# Supplementary material for: Improved Assessment of Globularity of Protein Structures and the Ellipsoid Profile of the Biological Assemblies from the PDB
Source: MDPI journal article supplement (doi:10.3390/biom13020385), 2023-02-17

**Figure S27. Asymmetric, 1 chain, 1 domain (A1o)**

**(a)  $r = 3$**

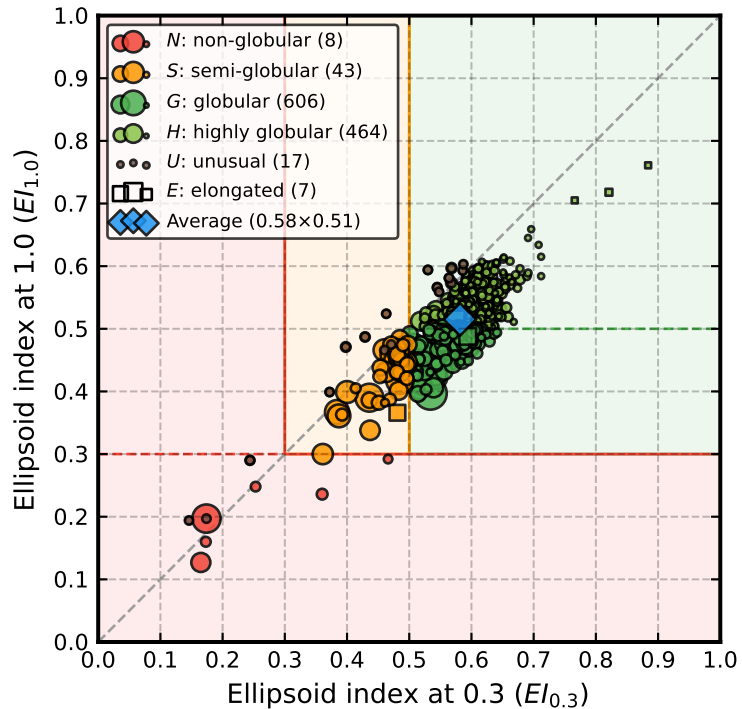

**(b)  $r = 0$**

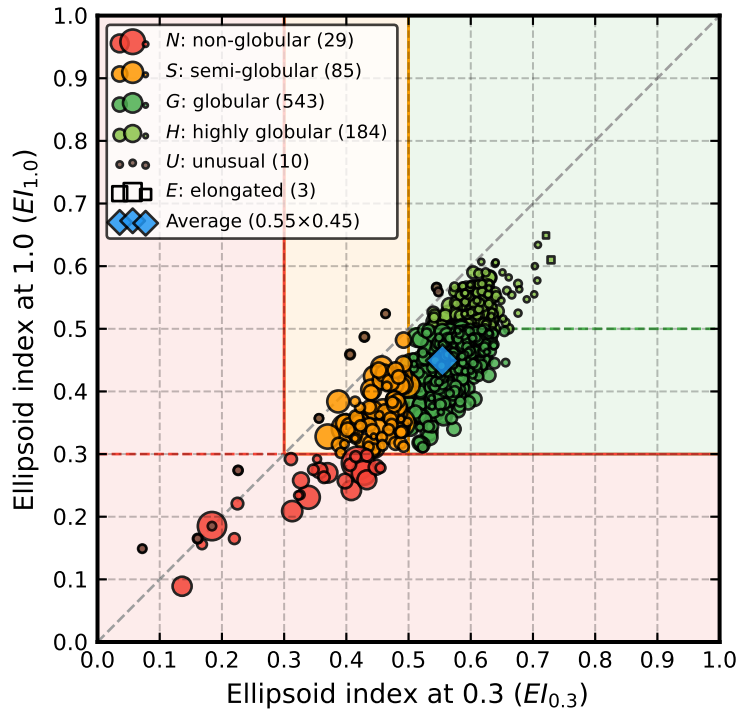

**Figure S28. Asymmetric, 1 chain, multiple domains (A1m)**

**(a)  $r = 3$**

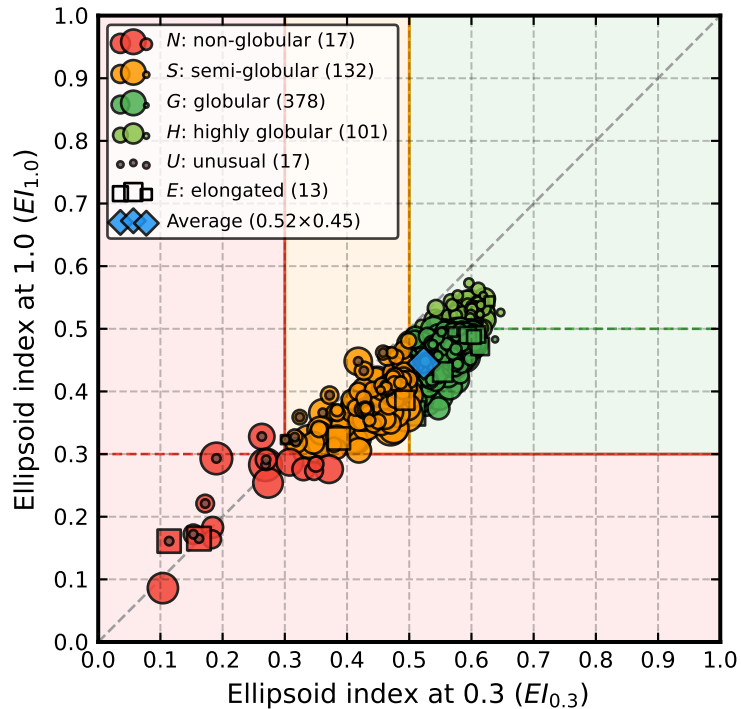

**(b)  $r = 0$**

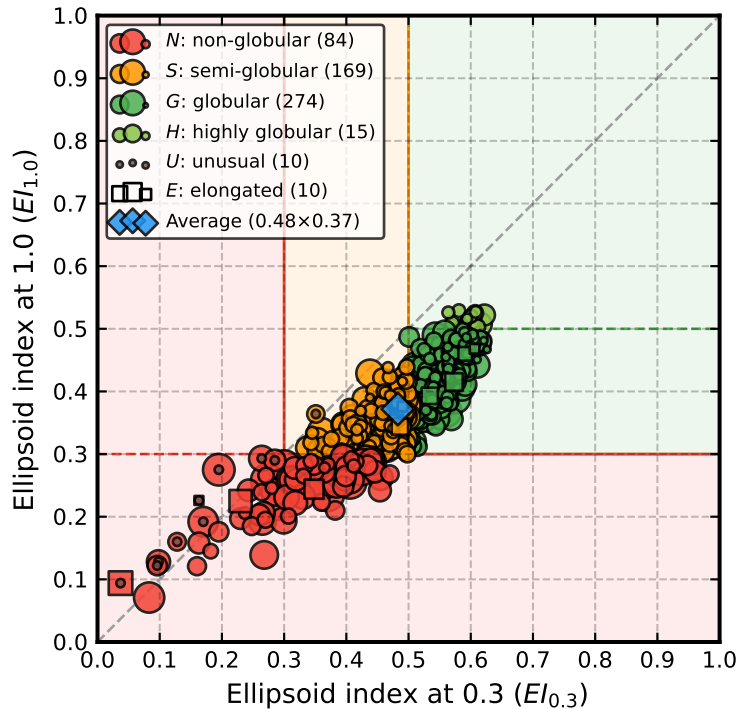

**Figure S29. Asymmetric, 2 chains, 1 or more domains per chain (A2)**

**(a)  $r = 3$**

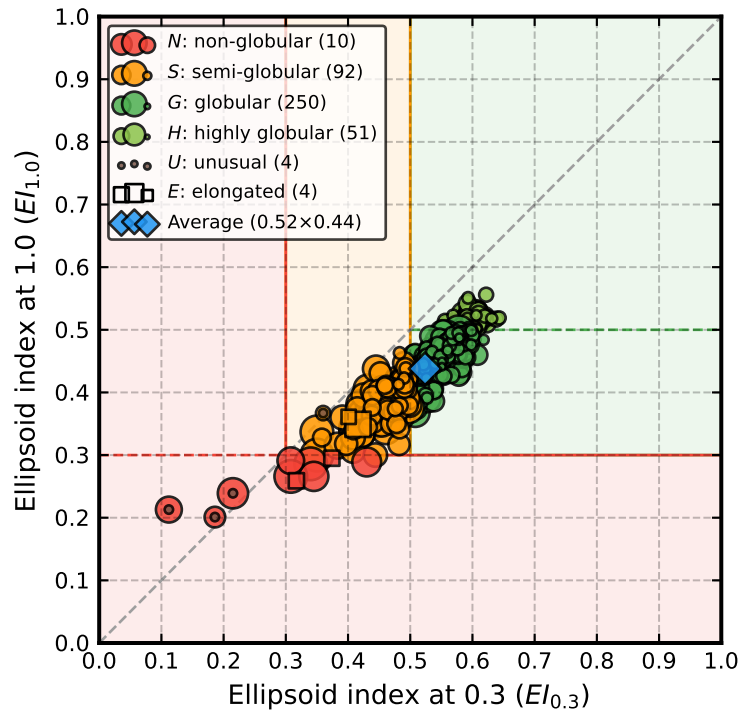

**(b)  $r = 0$**

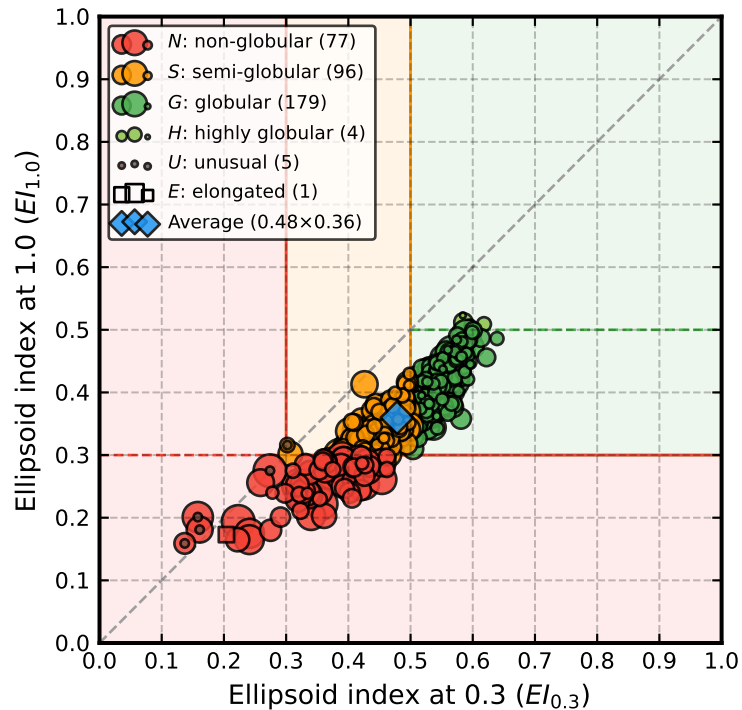

**Figure S30. Asymmetric, 3 chains, 1 or more domains per chain (A3)**

**(a)  $r = 3$**

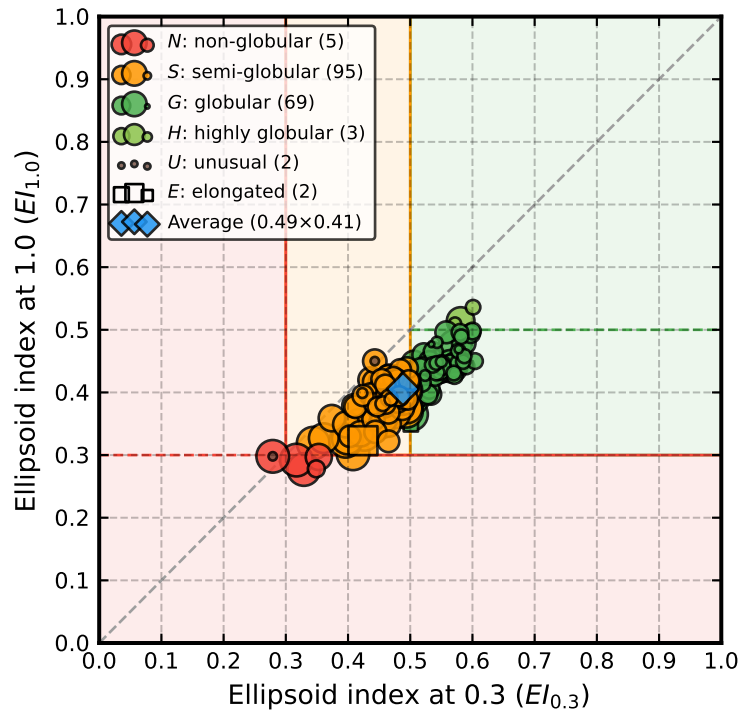

**(b)  $r = 0$**

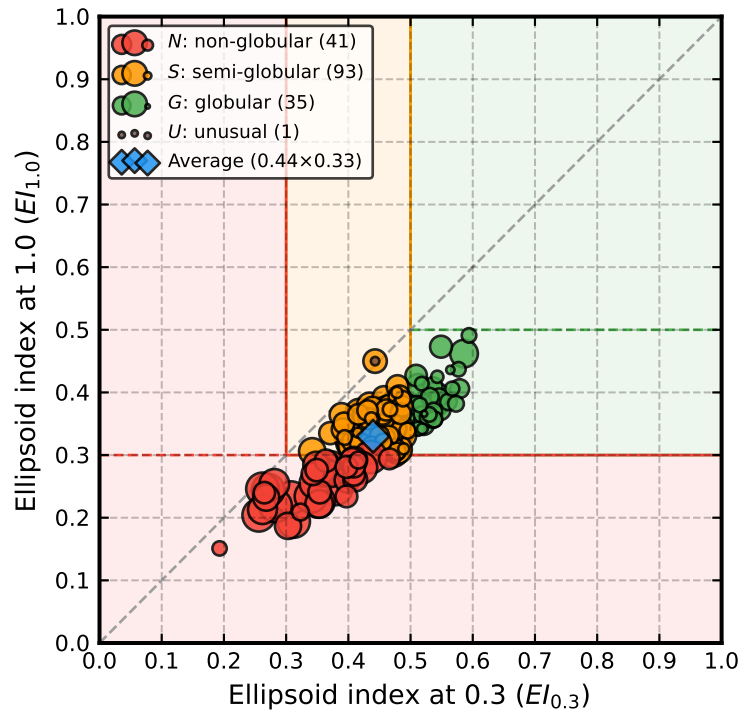

**Figure S31. Asymmetric, 4 or more chains, 1 or more domains per chain (A4+)**

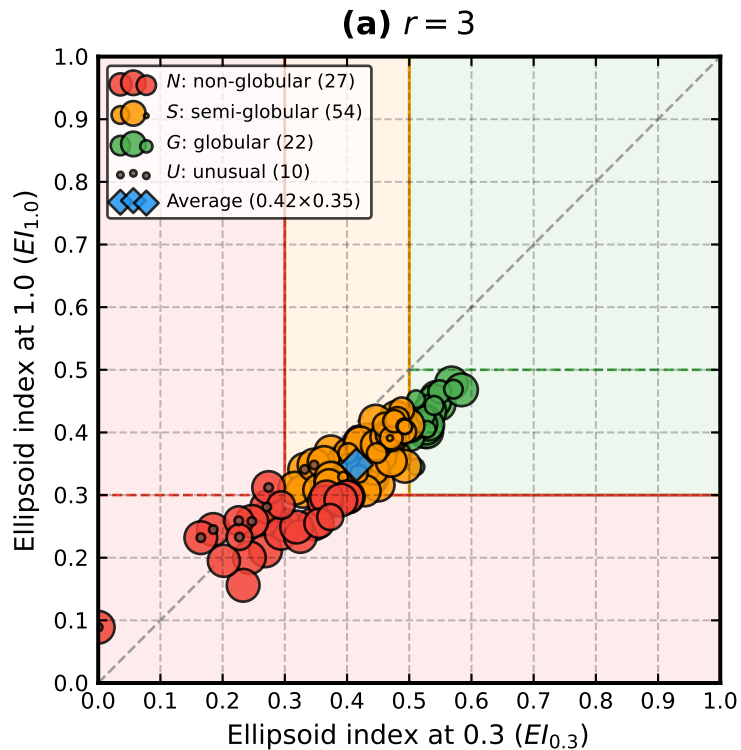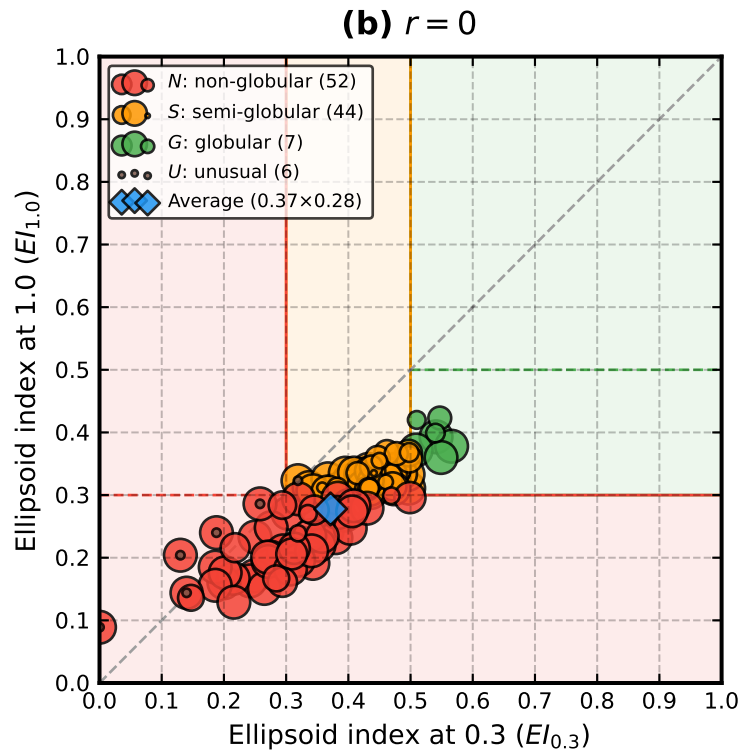

**Figure S32. C2 symmetry, 1 domain in every chain, homomeric (C2o=)**

**(a)  $r = 3$**

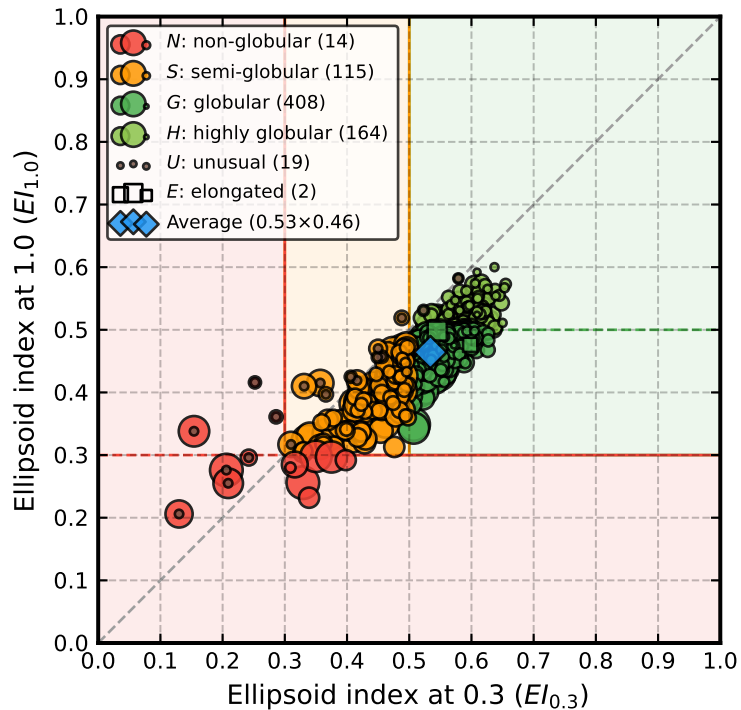

**(b)  $r = 0$**

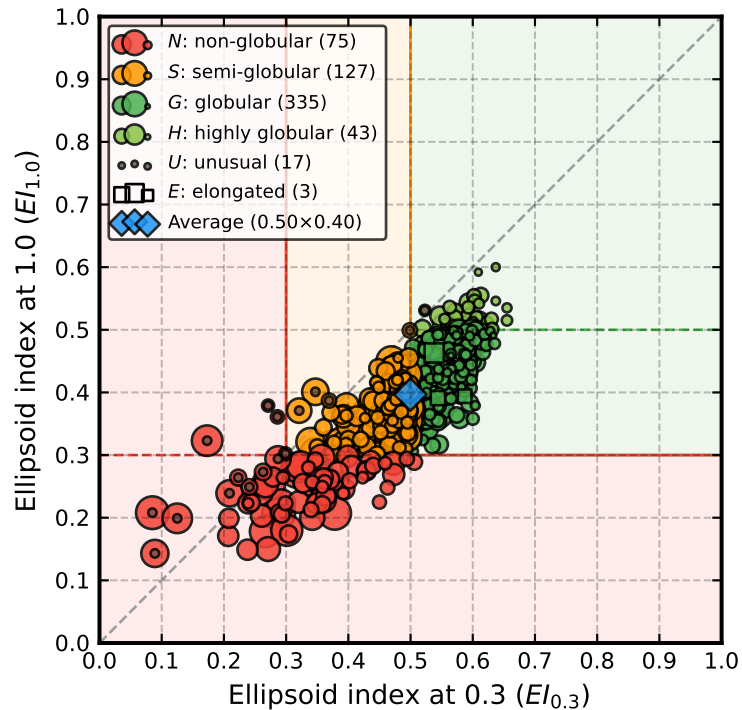

**Figure S33. C2 symmetry, multiple domains in some chains, homomeric (C2m=)**

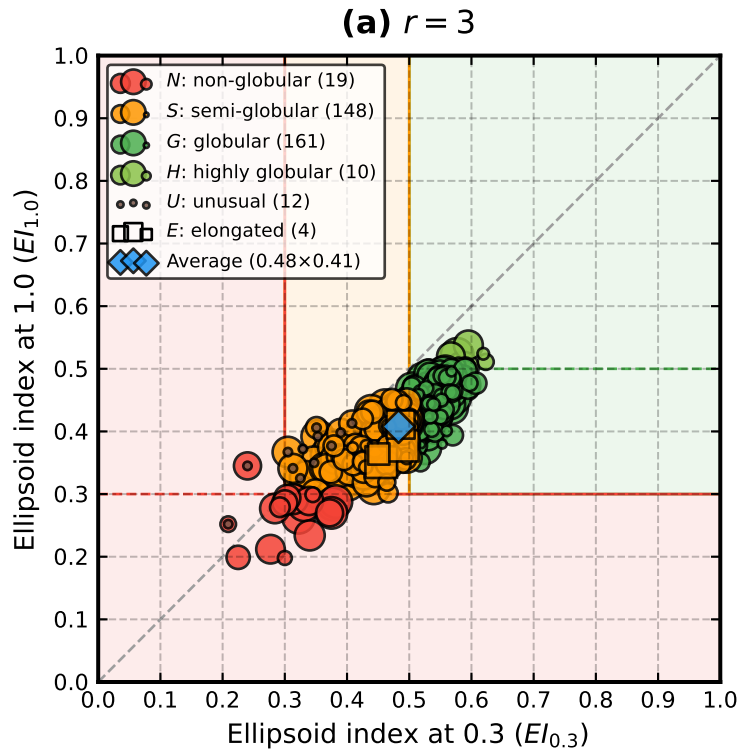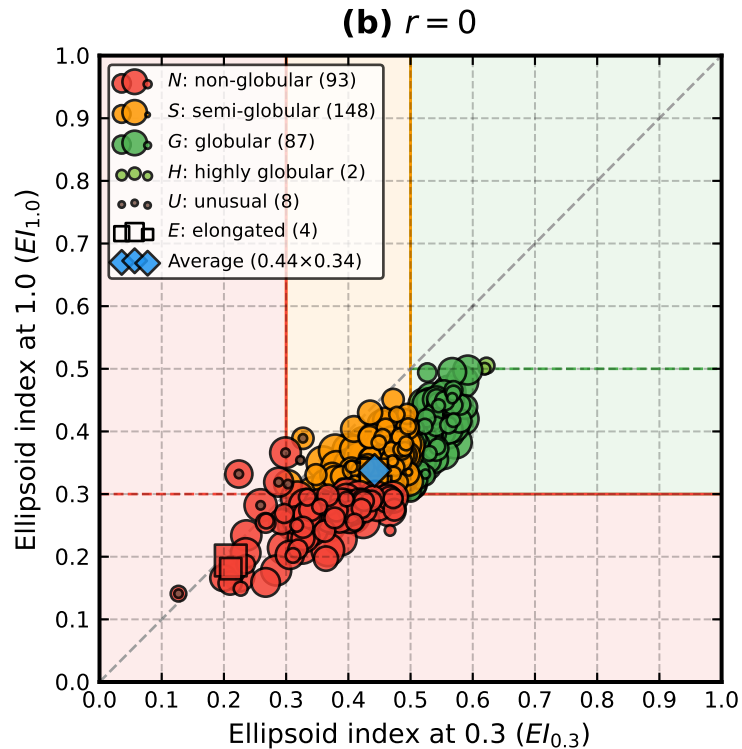

**Figure S34. C2 symmetry, 1 domain in every chain, heteromeric (C2o $\neq$ )**

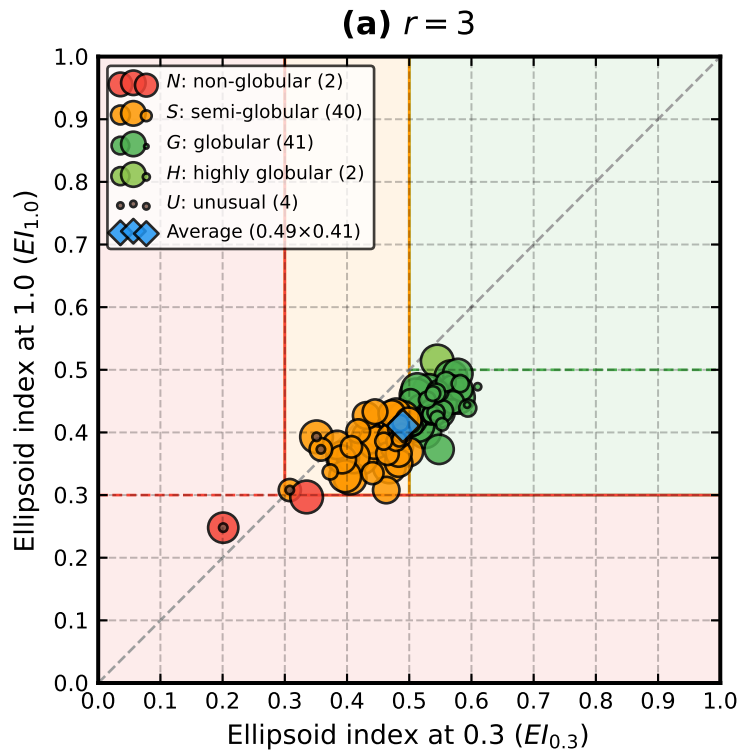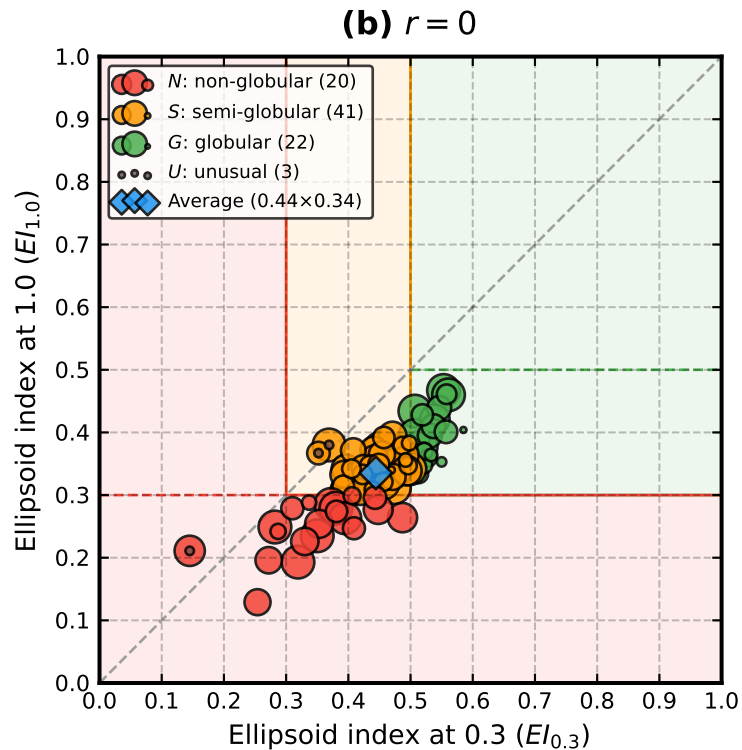



**Figure S35. C2 symmetry, multiple domains in some chains, heteromeric ( $C2m \neq$ )**

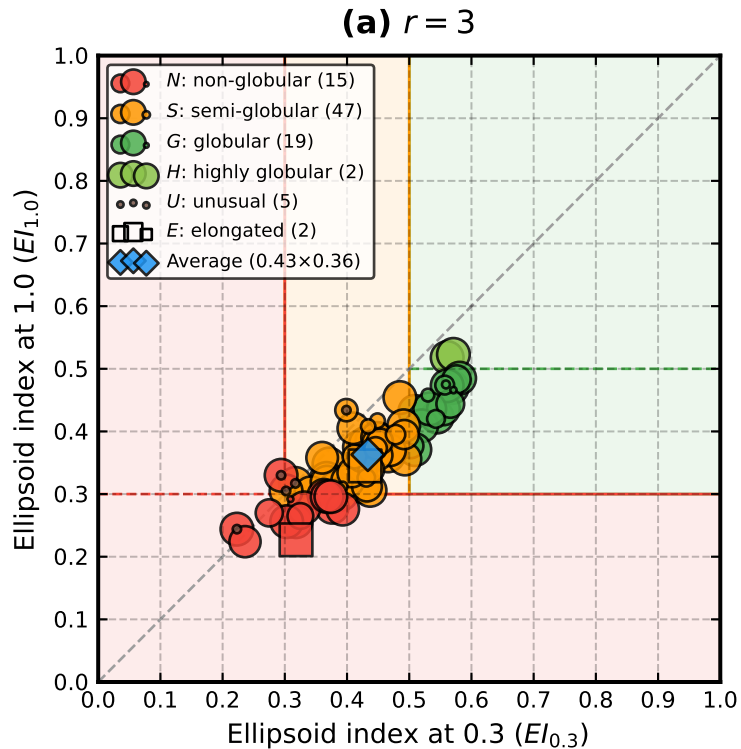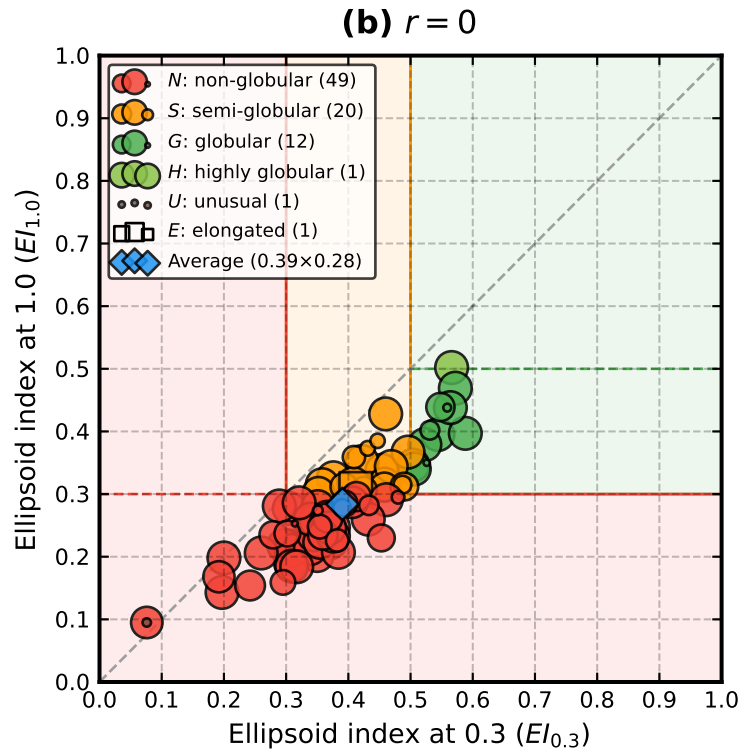

**Figure S36. C3 symmetry, 1 or more domains per chain (C3)**

**(a)  $r = 3$**

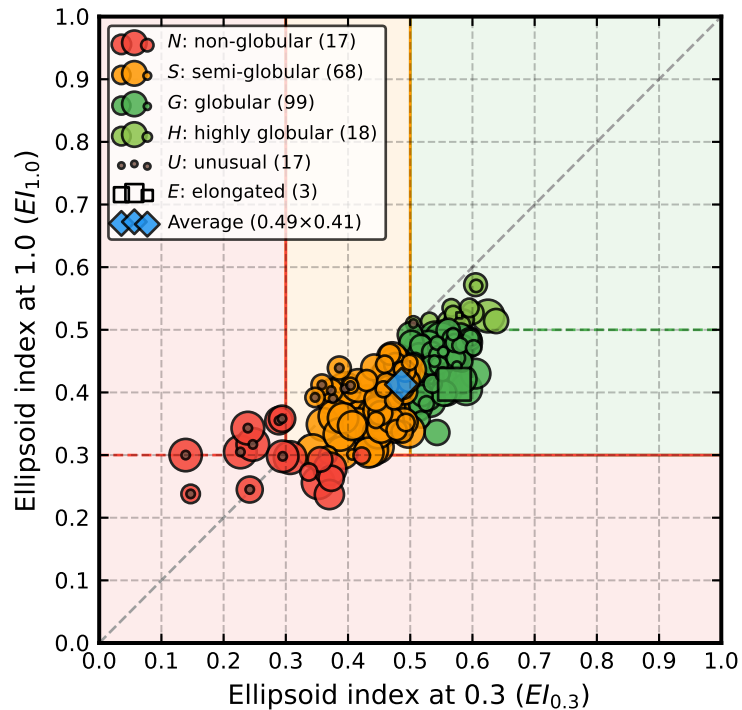

**(b)  $r = 0$**

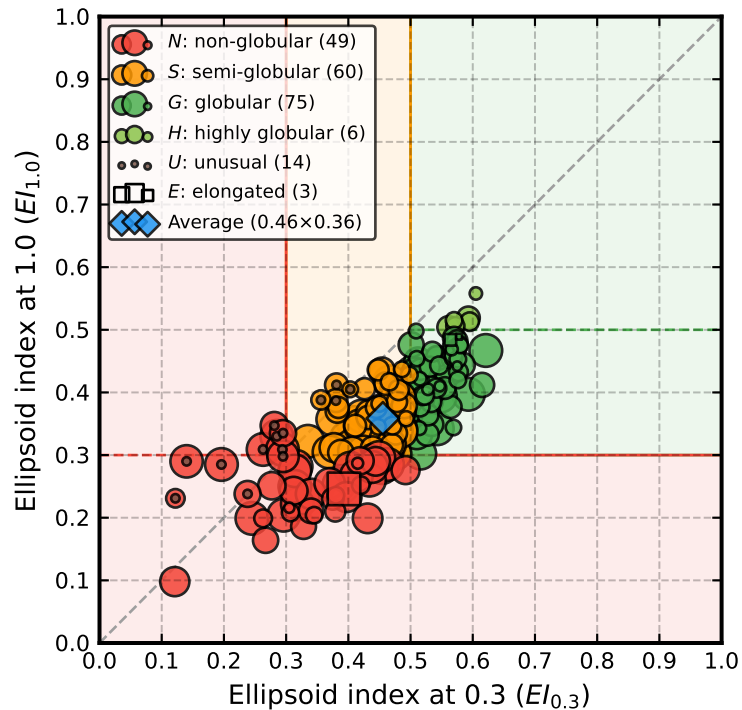

**Figure S37. C4 or higher symmetry, 1 or more domains per chain (C4+)**

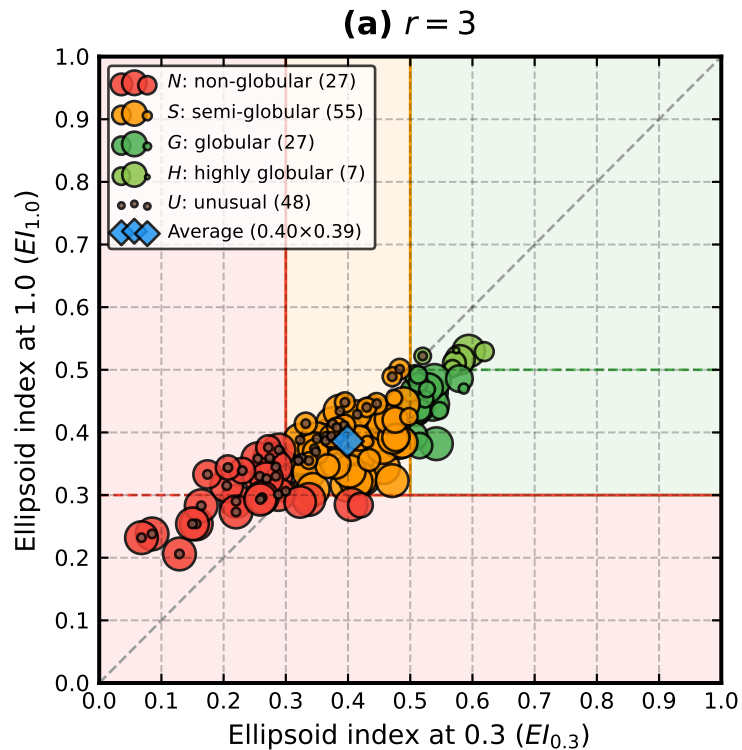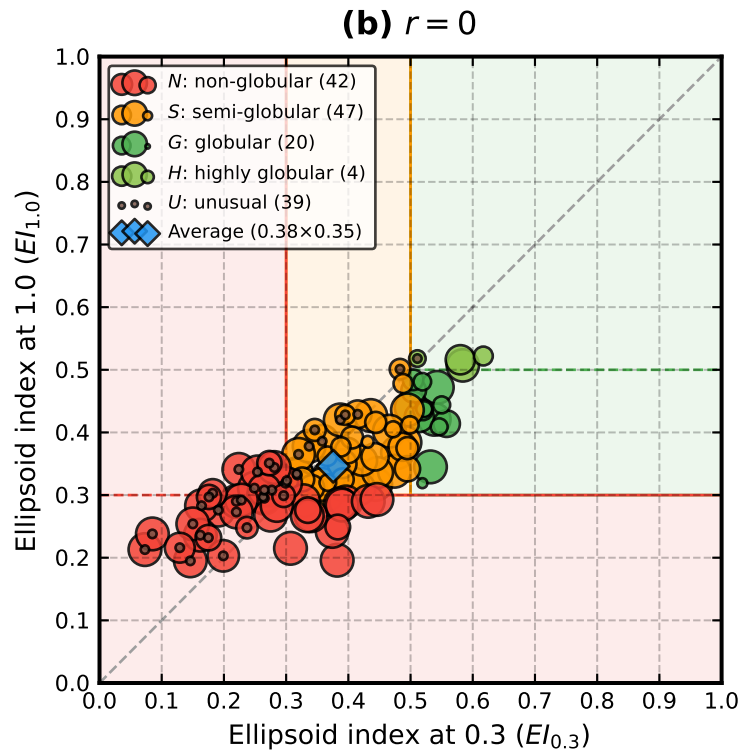

**Figure S38. D2 symmetry, 1 or more domains per chain (D2)**

**(a)  $r = 3$**

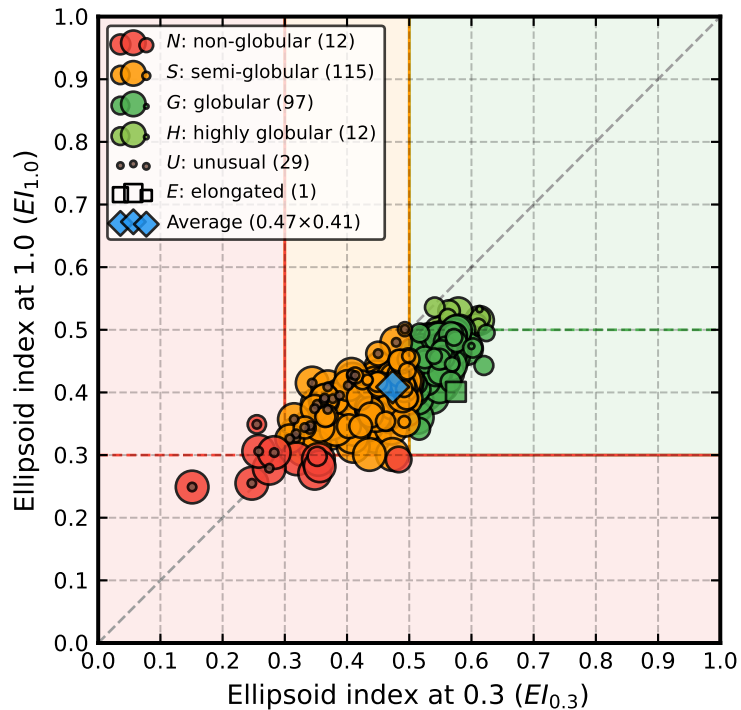

**(b)  $r = 0$**

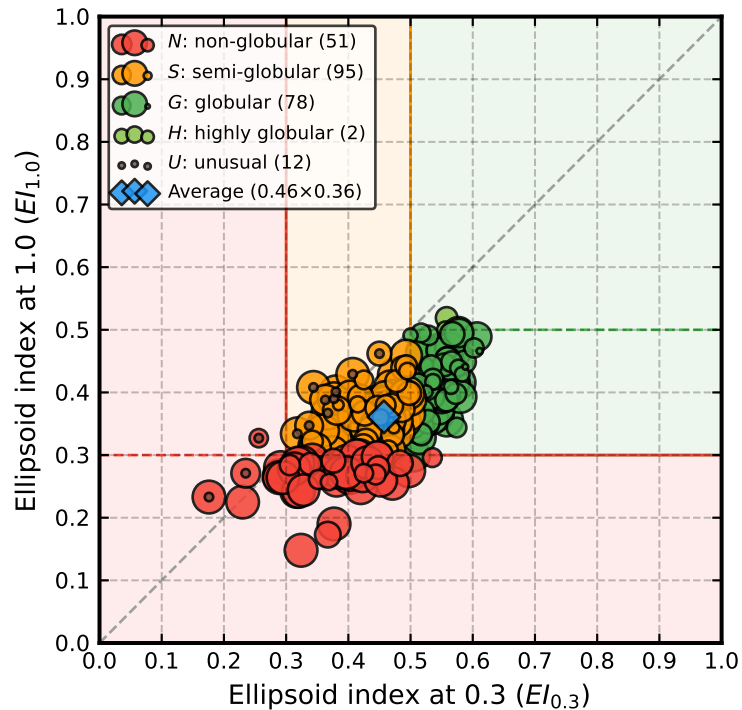

**Figure S39. D3 symmetry, 1 or more domains per chain (D3)**

**(a)  $r = 3$**

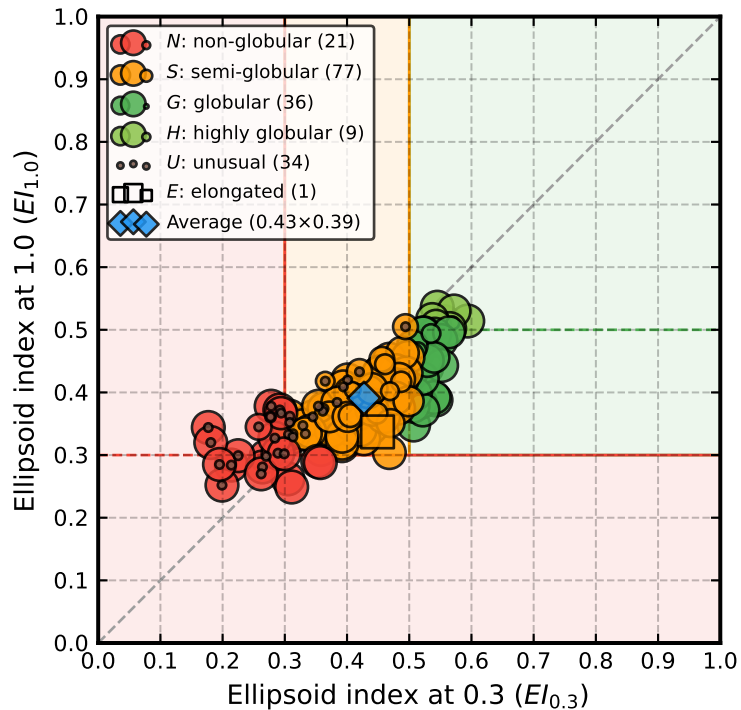

**(b)  $r = 0$**

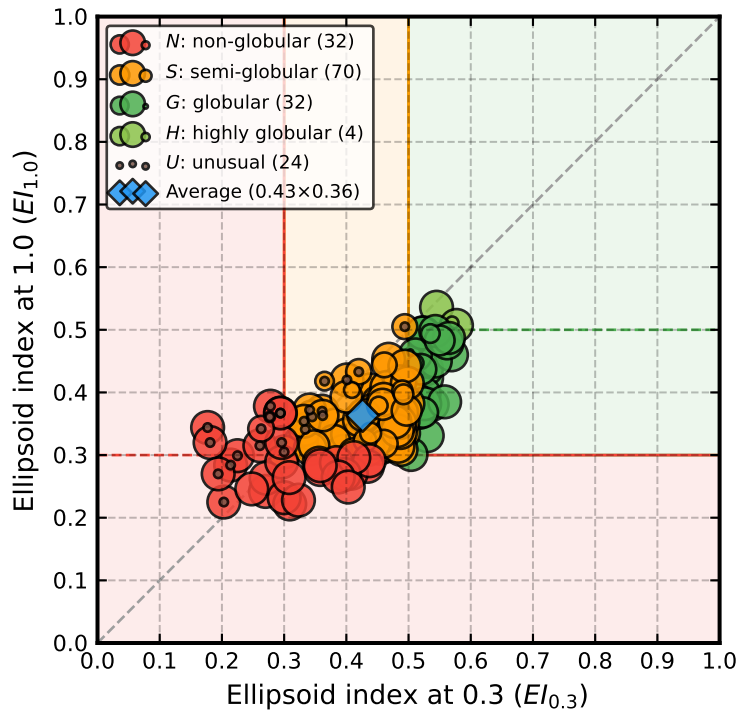

**Figure S40. D4 or higher symmetry, 1 or more domains per chain (D4+)**

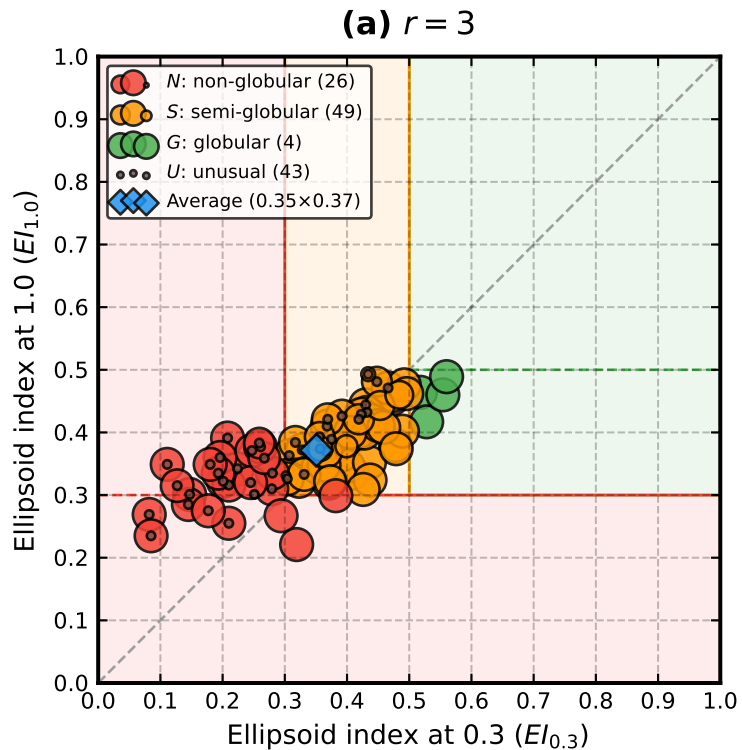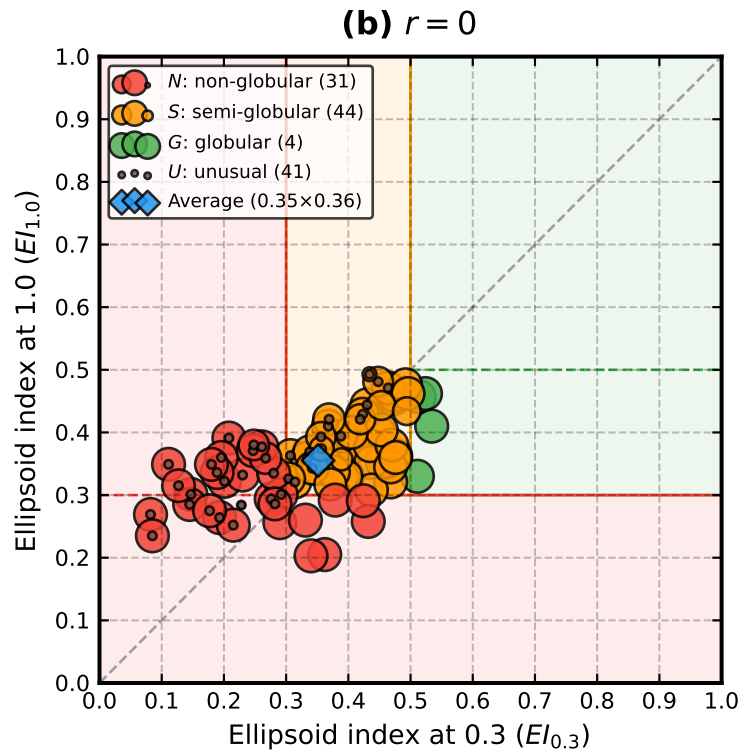

**Figure S41. Tetrahedral or octahedral or icosahedral symmetry (TOI)**

**(a)  $r = 3$**

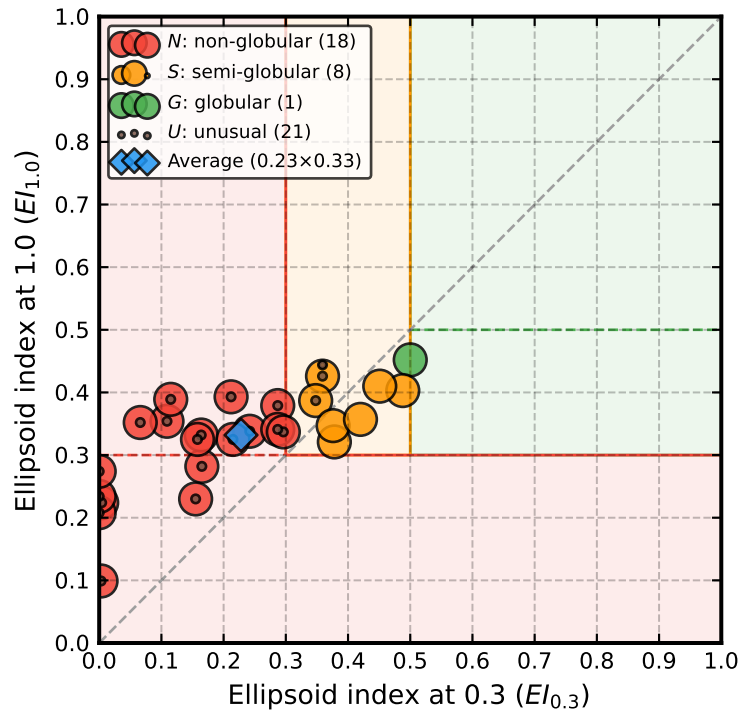

**(b)  $r = 0$**

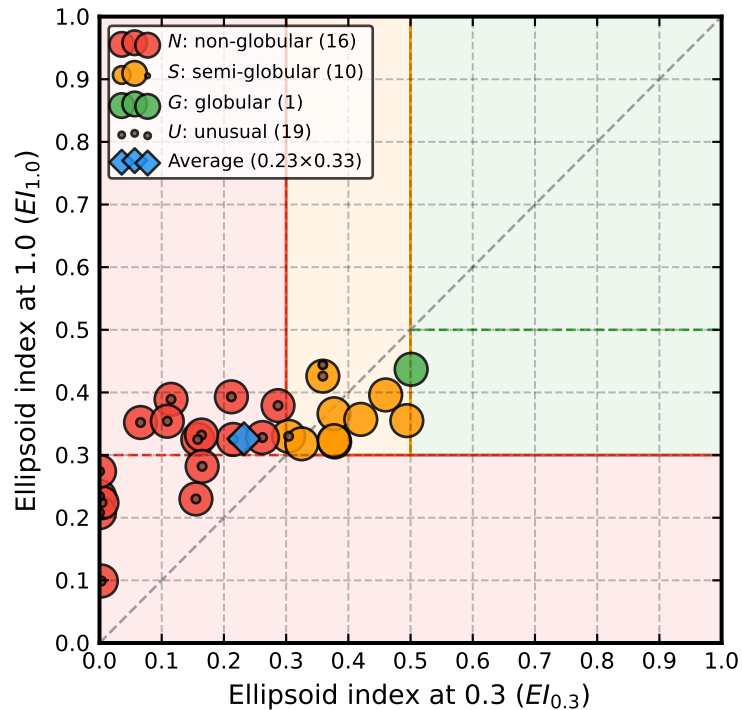

Supplement: s1 [file s1]
