# Supplementary material for: Improved Assessment of Globularity of Protein Structures and the Ellipsoid Profile of the Biological Assemblies from the PDB
Source: MDPI journal article supplement (doi:10.3390/biom13020385), 2023-02-17

**Figure S19. SCOP class a - all alpha proteins**

**(a)  $r = 3$**

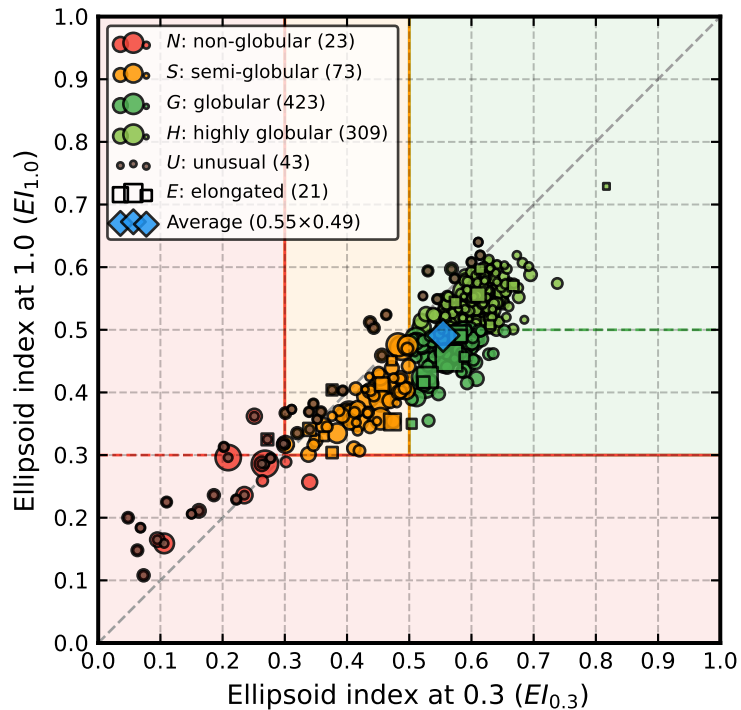

**(b)  $r = 0$**

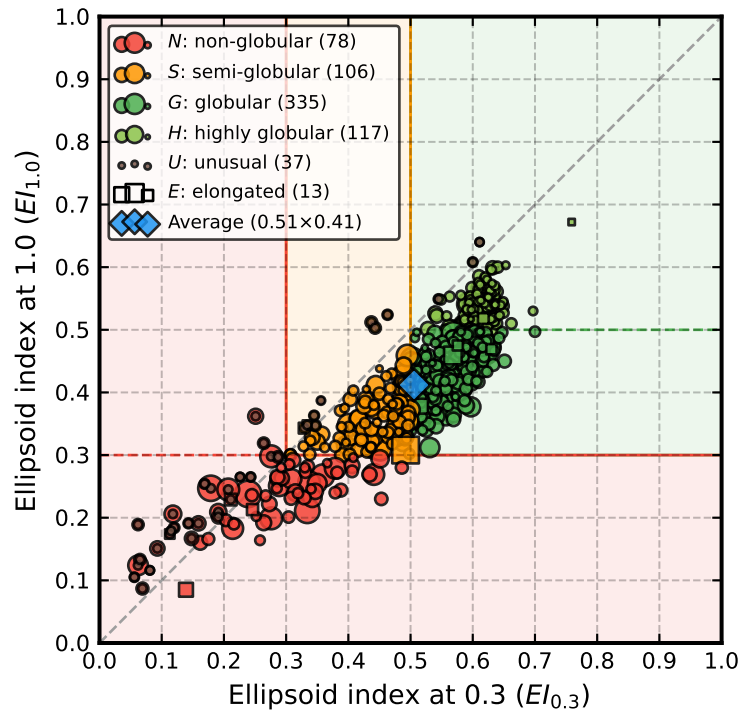

**Figure S20. SCOP class b - all beta proteins**

**(a)  $r = 3$**

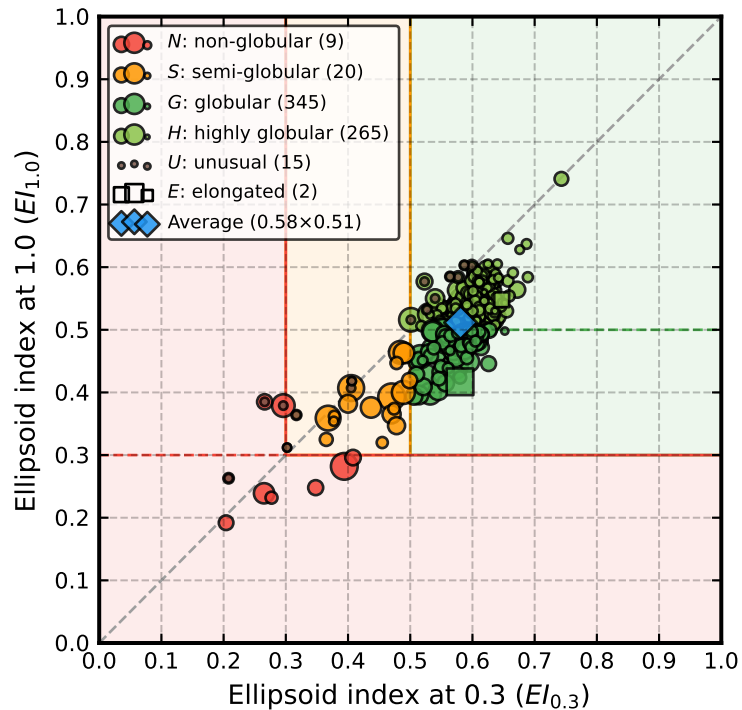

**(b)  $r = 0$**

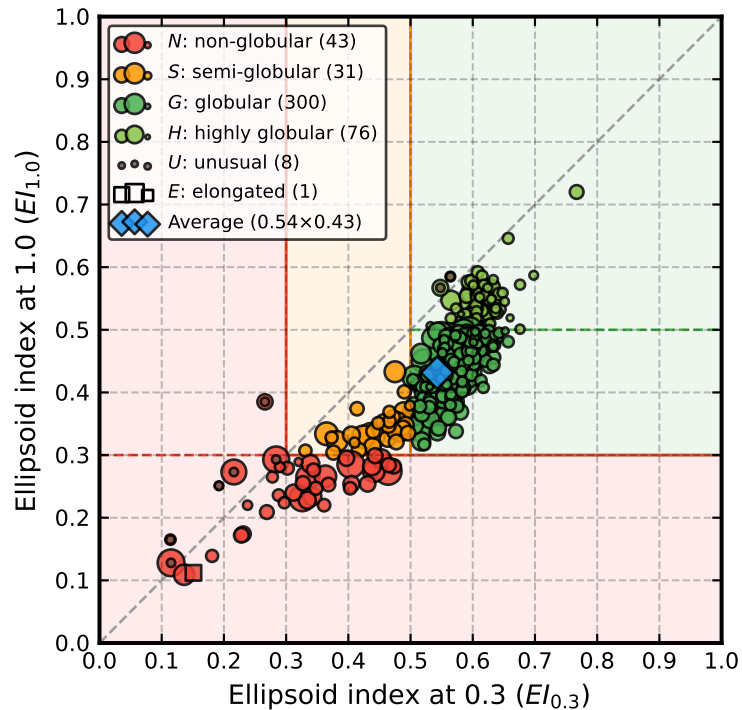

**Figure S21. SCOP class c - alpha and beta proteins (a/b)**

**(a)  $r = 3$**

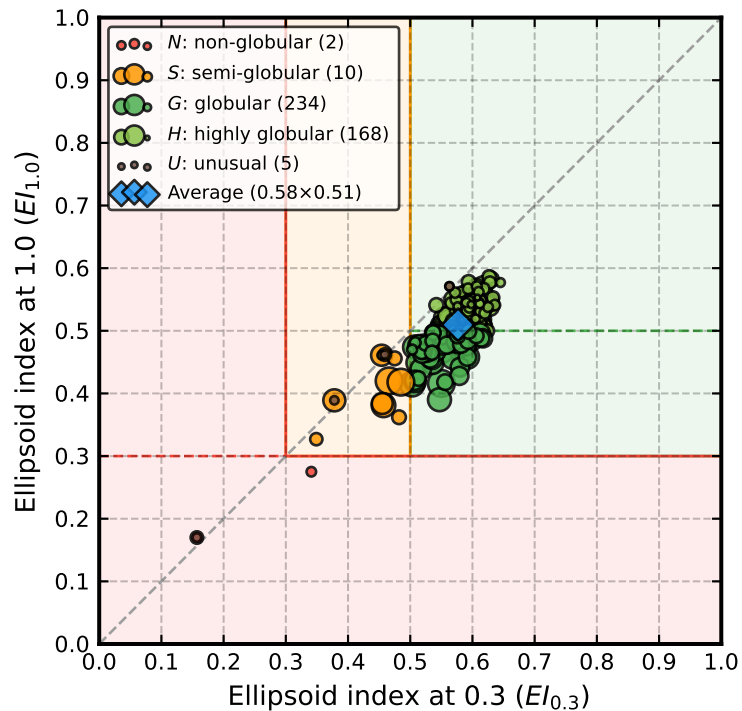

**(b)  $r = 0$**

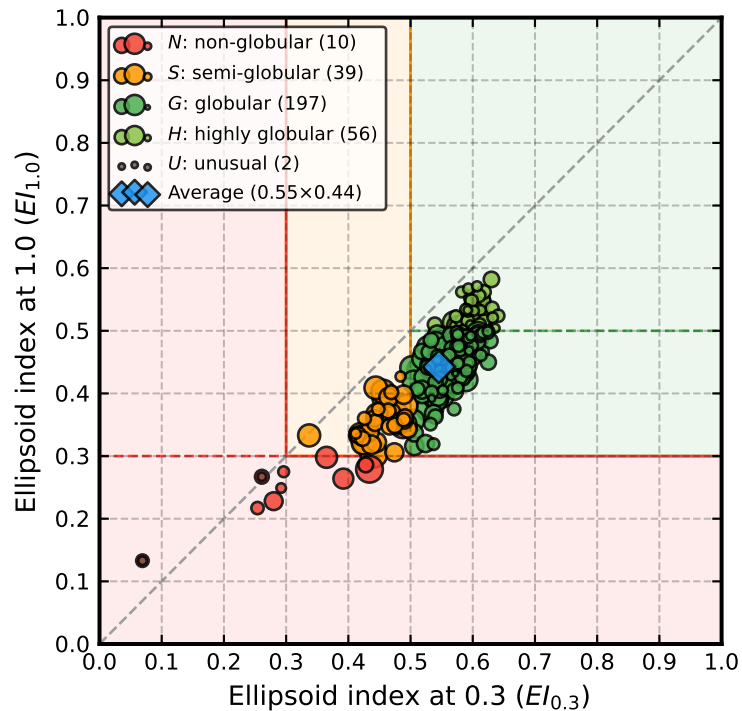

**Figure S22. SCOP class d - alpha and beta proteins (a+b)**

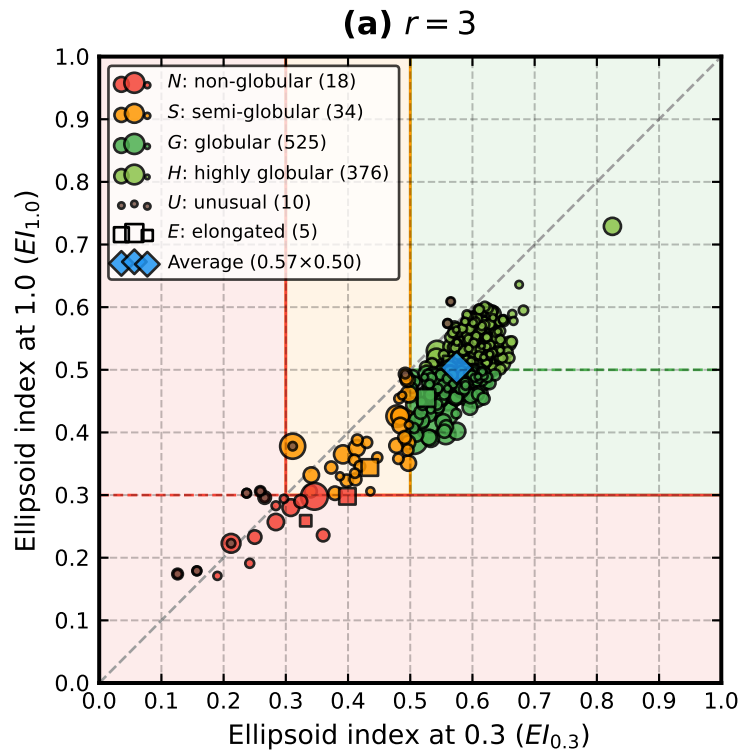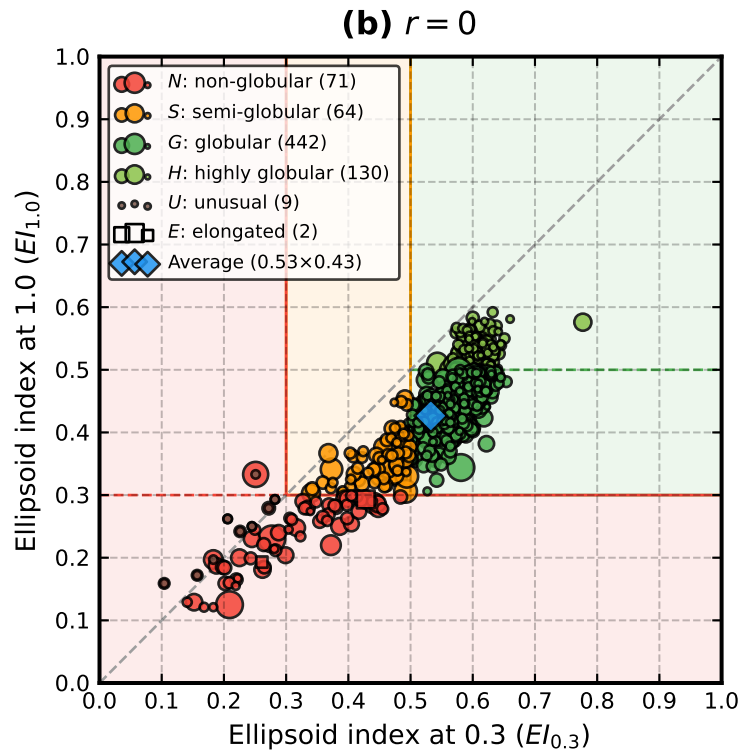

**Figure S23. SCOP class e - multi-domain proteins**

**(a)  $r = 3$**

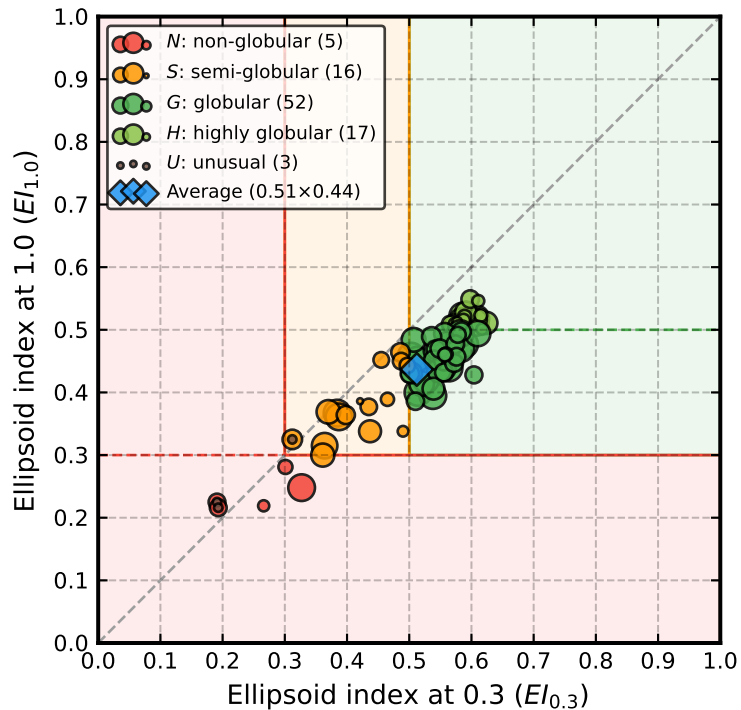

**(b)  $r = 0$**

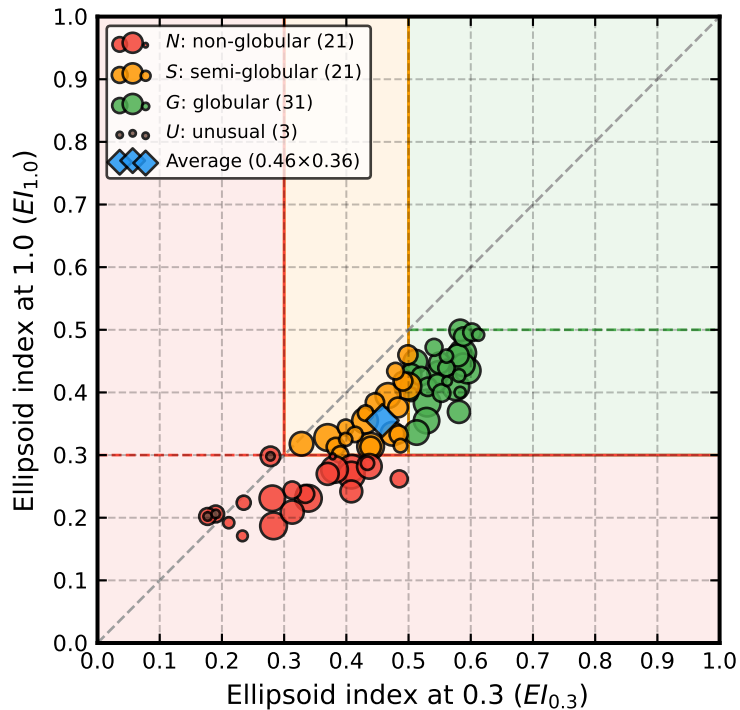

**Figure S24. SCOP class f - membrane and cell surface proteins**

**(a)  $r = 3$**

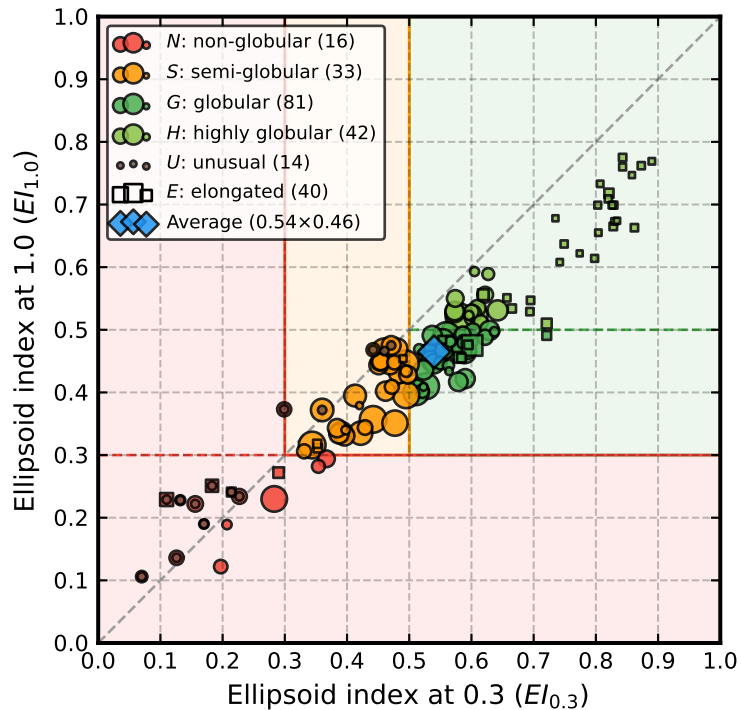

**(b)  $r = 0$**

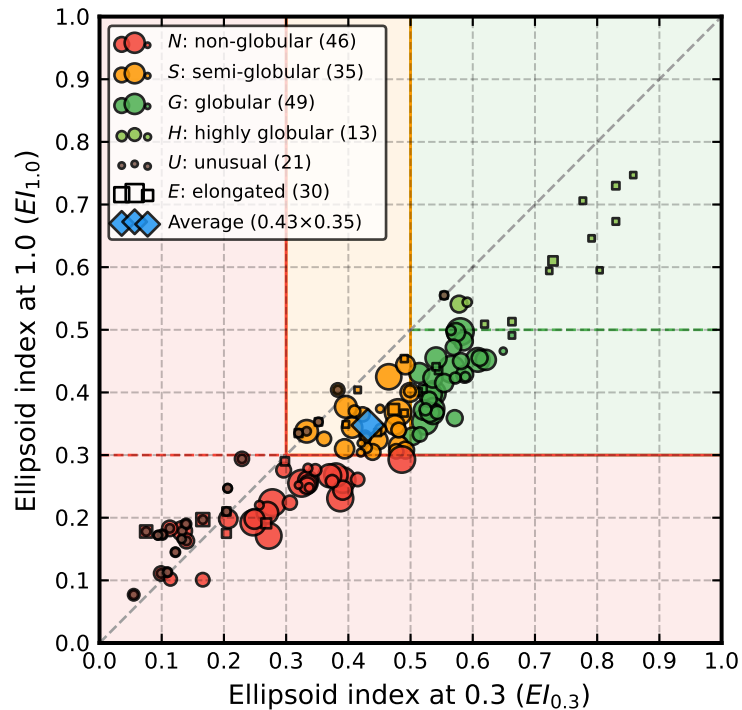

**Figure S25. SCOP class g - small proteins**

**(a)  $r = 3$**

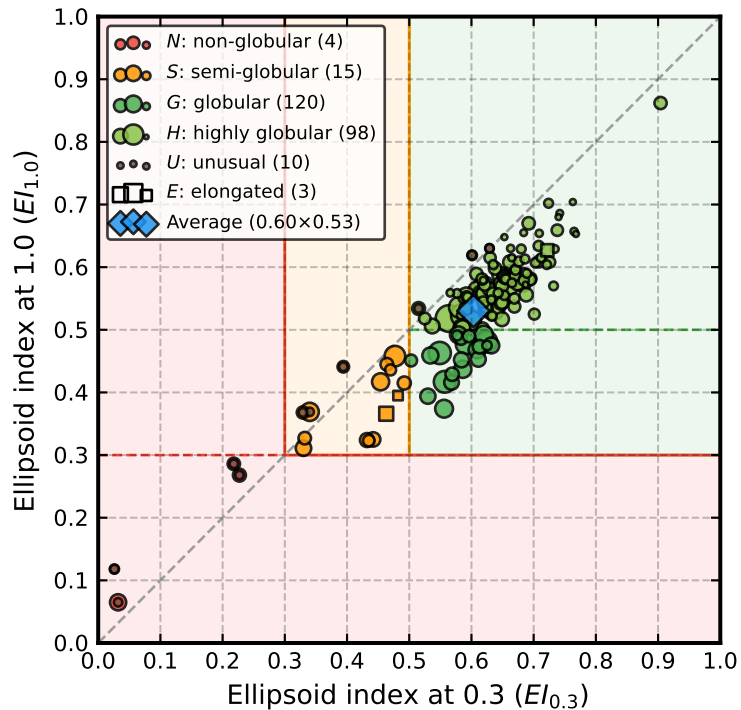

**(b)  $r = 0$**

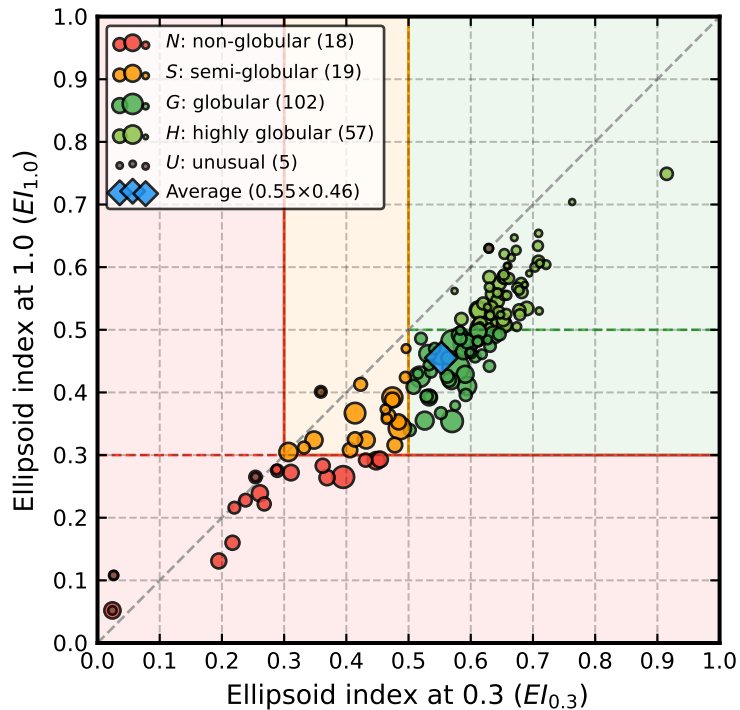

**Figure S26. SCOP class h - coiled coil proteins**

**(a)  $r = 3$**

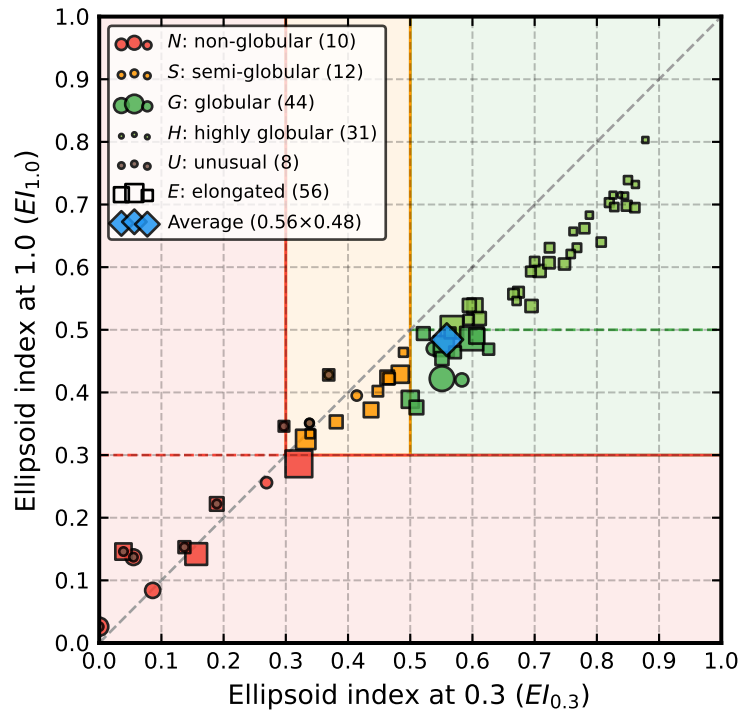

**(b)  $r = 0$**

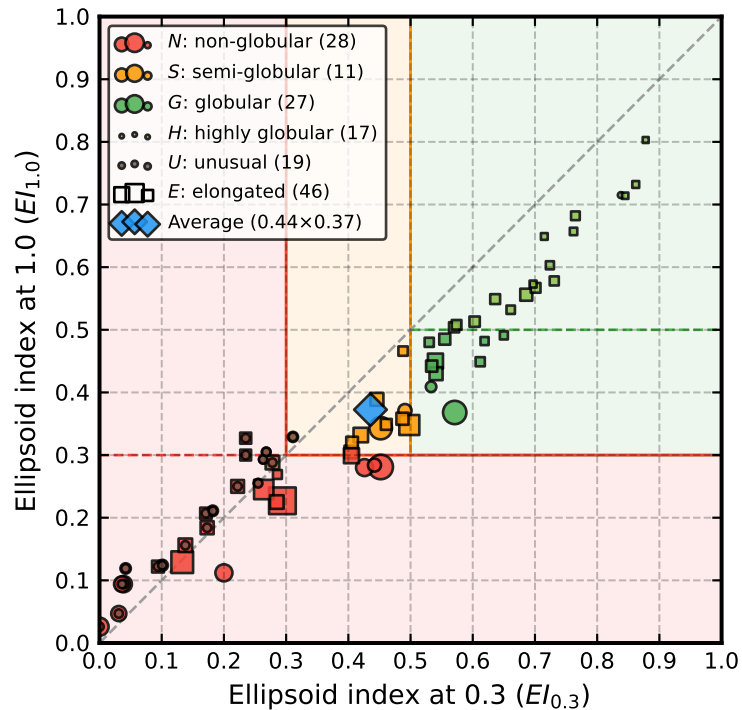

Supplement: s1 [file s1]
