# Supplementary material for: Improved Assessment of Globularity of Protein Structures and the Ellipsoid Profile of the Biological Assemblies from the PDB
Source: MDPI journal article supplement (doi:10.3390/biom13020385), 2023-02-17

**Figure S7. Endoglucanase A - 1IS9:A**

**(a)  $r = 3$**

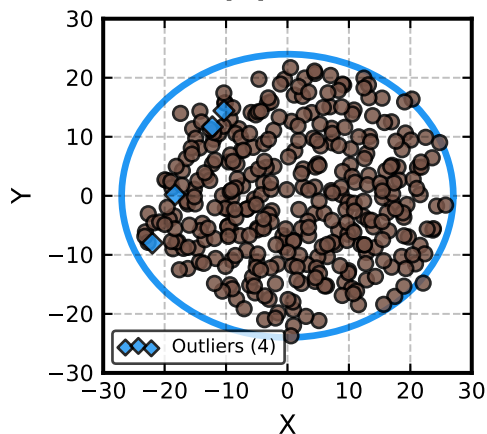

**(b)  $r = 3$**

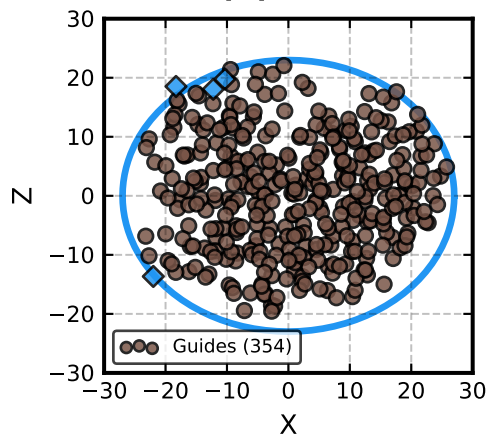

**(c)  $r = 3$**

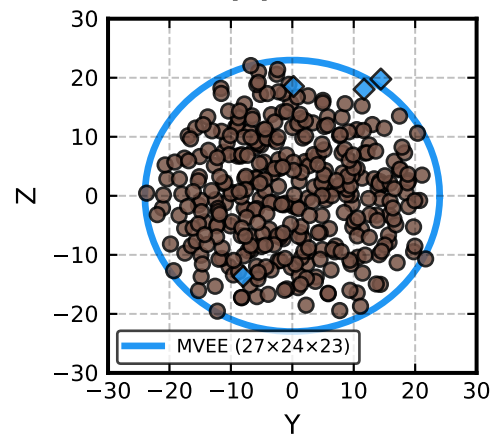

**(d)  $r = 0$**

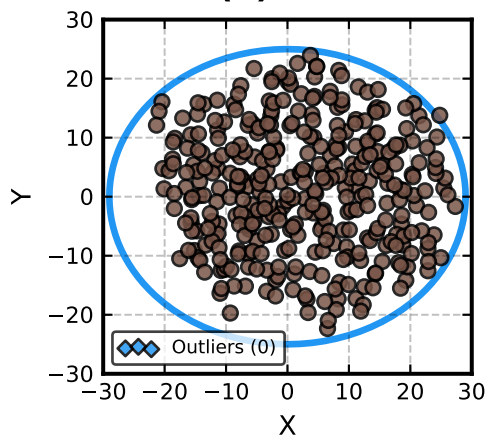

**(e)  $r = 0$**

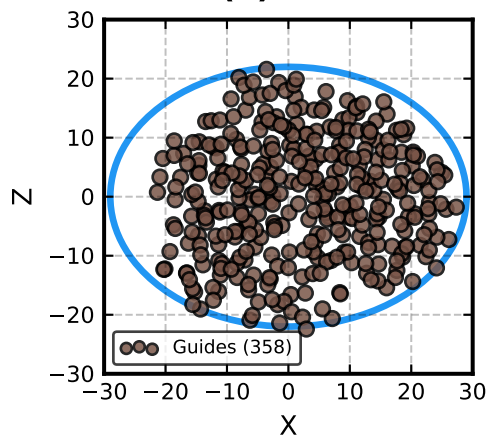

**(f)  $r = 0$**

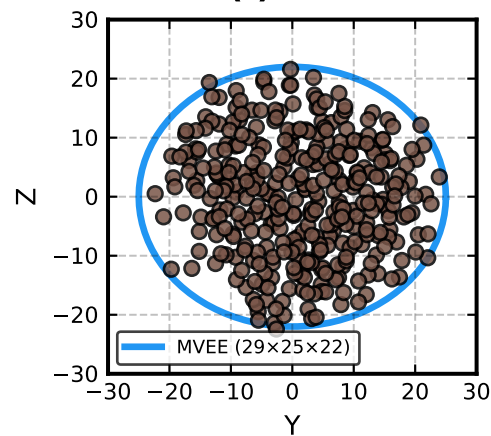

**Figure S8. Uncharacterized Protein - 3BPD:(A-G)**

**(a)  $r = 3$**

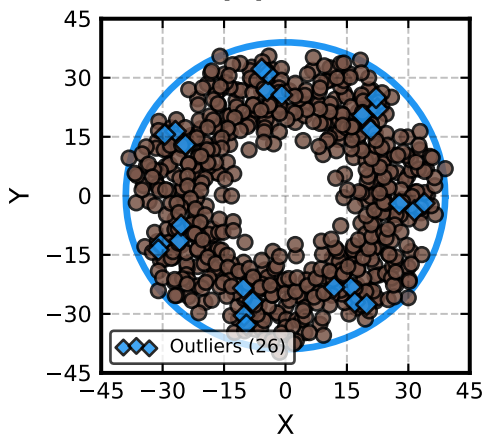

**(b)  $r = 3$**

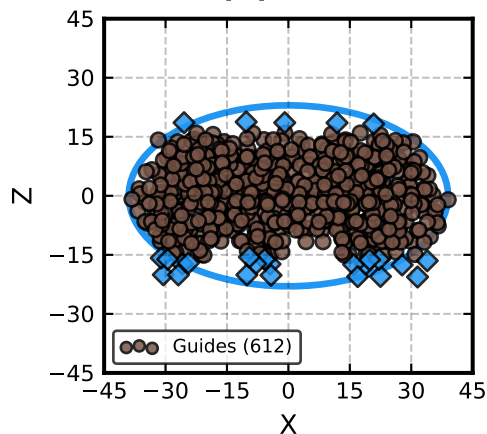

**(c)  $r = 3$**

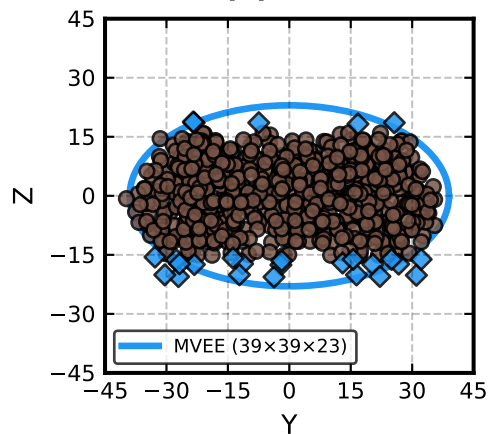

**(d)  $r = 0$**

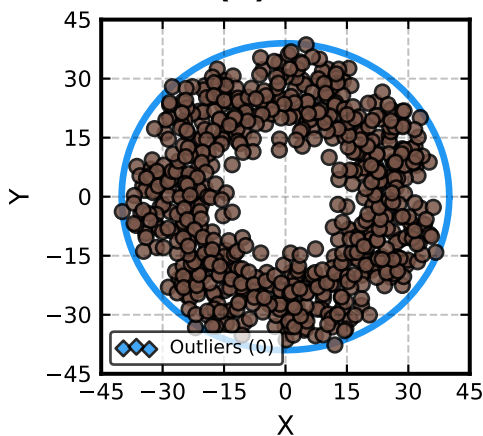

**(e)  $r = 0$**

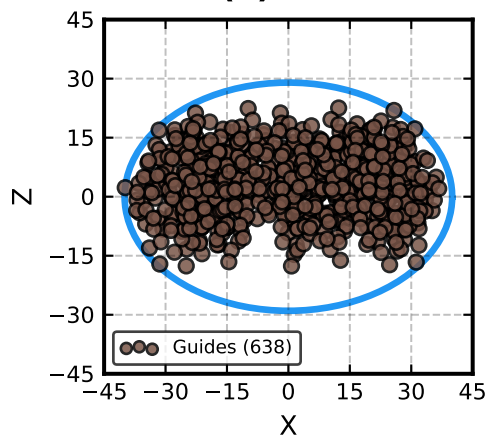

**(f)  $r = 0$**

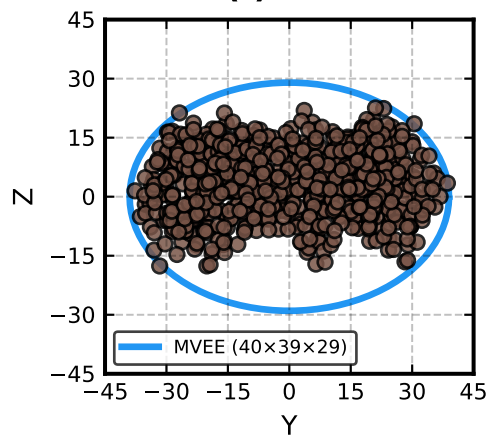

**Figure S9. dUTPase YncF - 4B0H:B**

**(a)  $r = 3$**

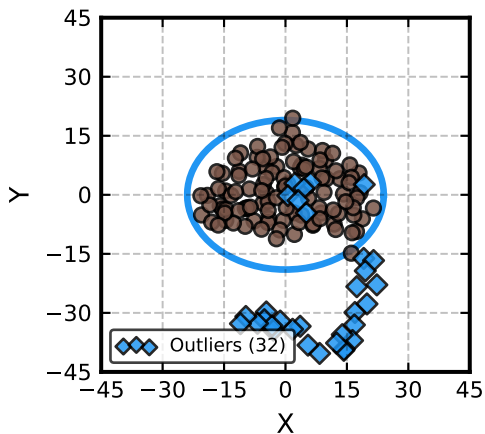

**(b)  $r = 3$**

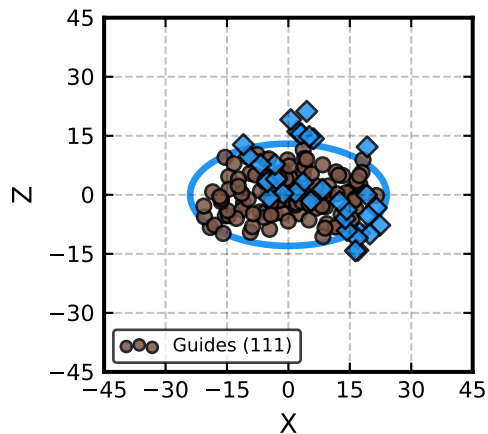

**(c)  $r = 3$**

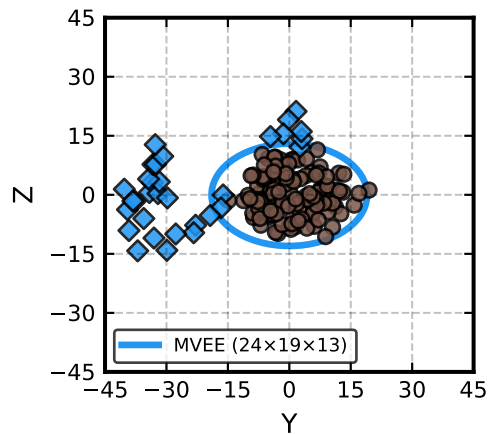

**(d)  $r = 0$**

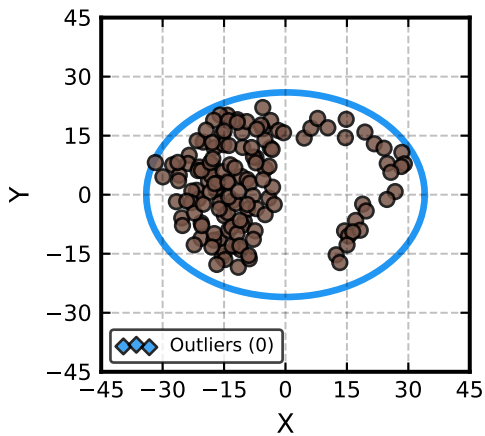

**(e)  $r = 0$**

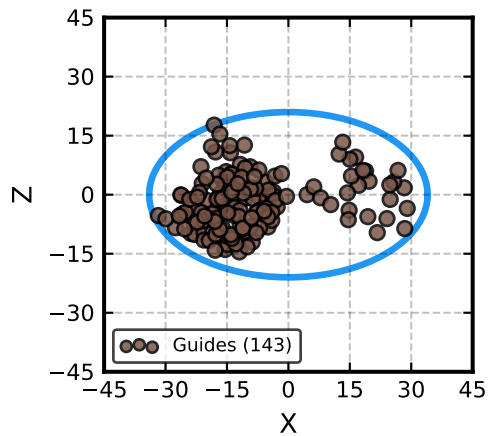

**(f)  $r = 0$**

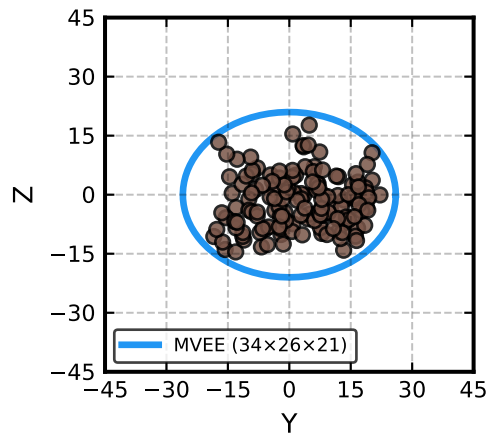

**Figure S10. HLA-DR Invariant Chain - 1IIE:(A-C)**

**(a)  $r = 3$**

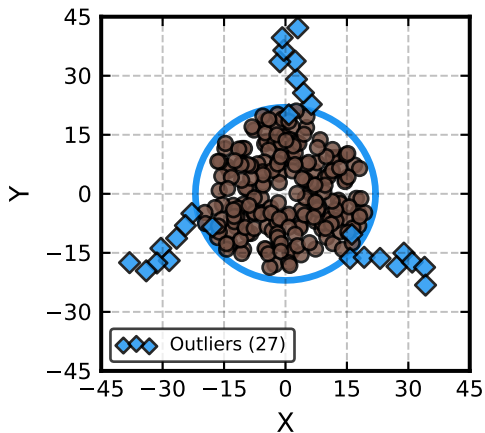

**(b)  $r = 3$**

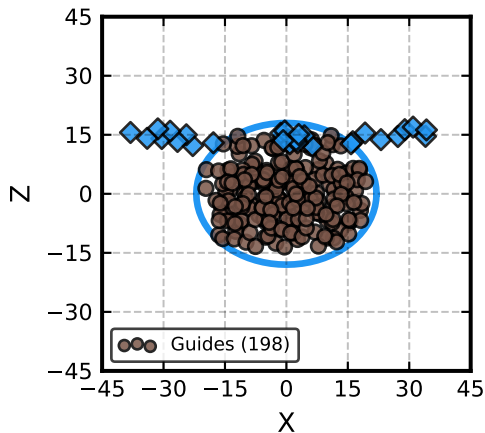

**(c)  $r = 3$**

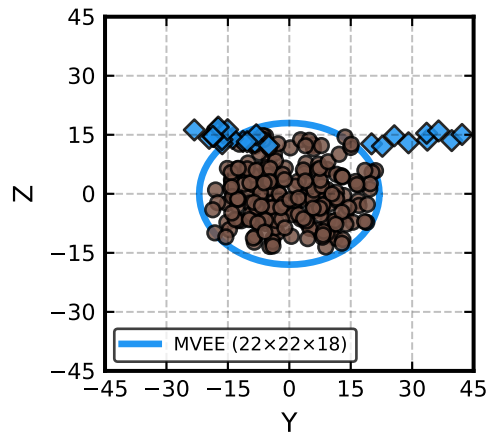

**(d)  $r = 0$**

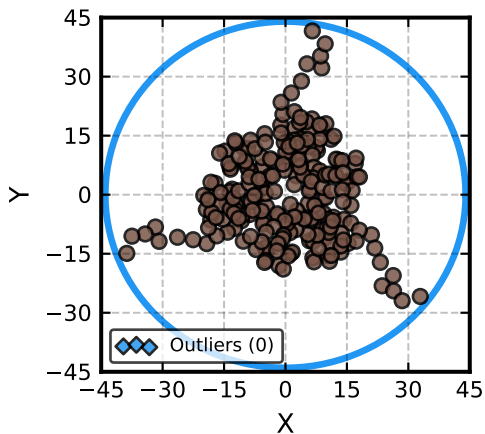

**(e)  $r = 0$**

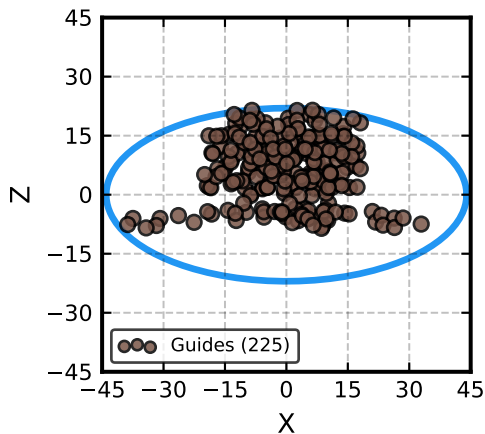

**(f)  $r = 0$**

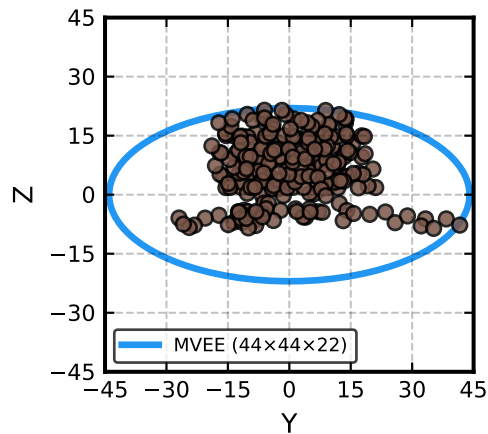

**Figure S11. Alpha Synuclein - 2KKW:A**

**(a)  $r = 3$**

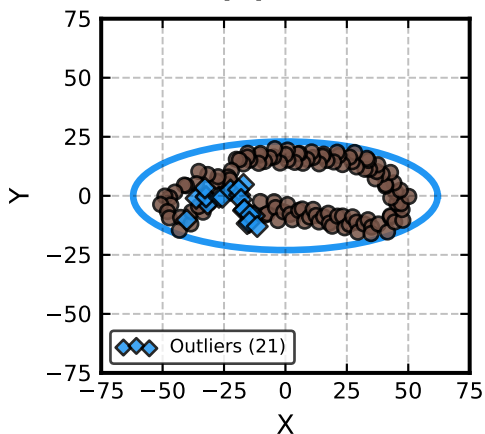

**(b)  $r = 3$**

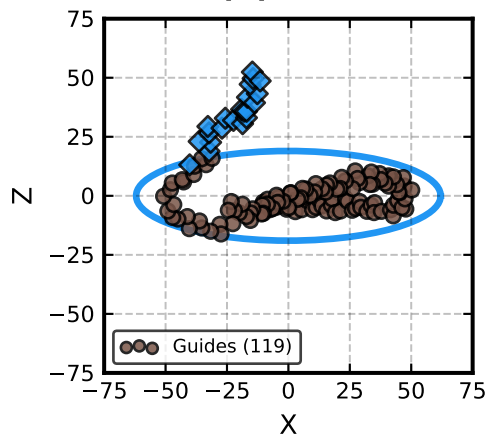

**(c)  $r = 3$**

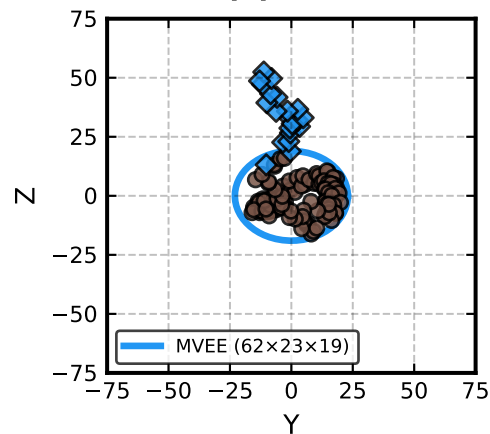

**(d)  $r = 0$**

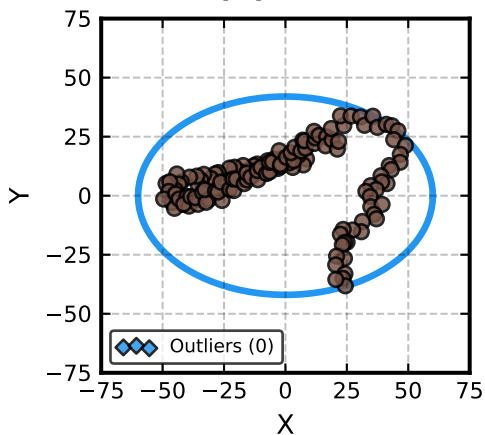

**(e)  $r = 0$**

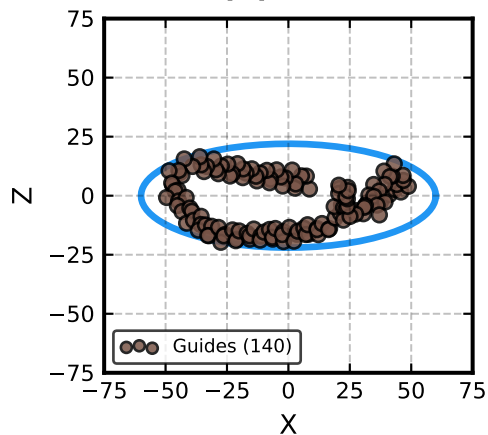

**(f)  $r = 0$**

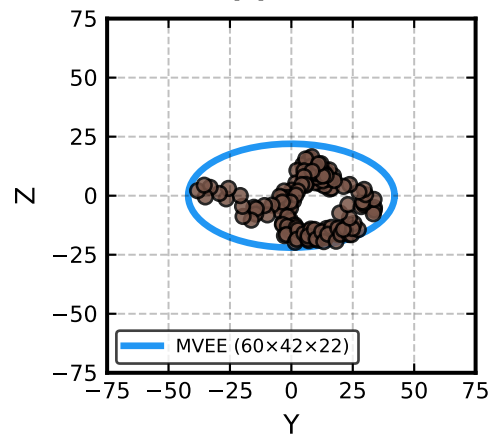

**Figure S12. Ribosomal Protein L9 - 1DIV:(A+B)**

**(a)  $r = 3$**

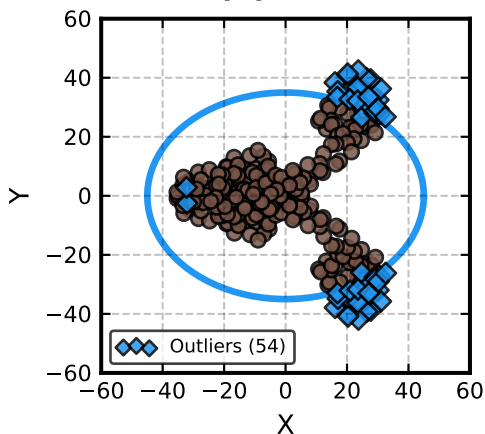

**(b)  $r = 3$**

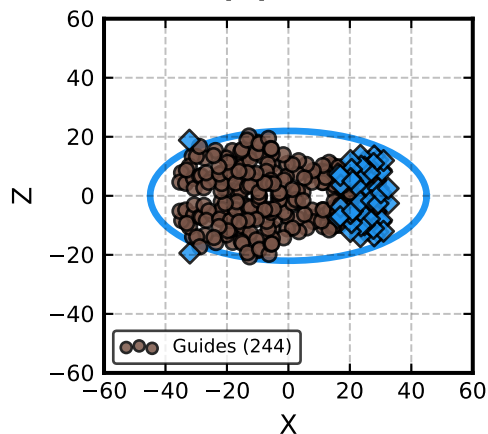

**(c)  $r = 3$**

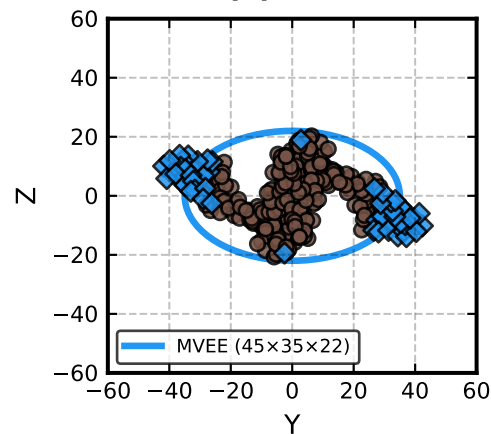

**(d)  $r = 0$**

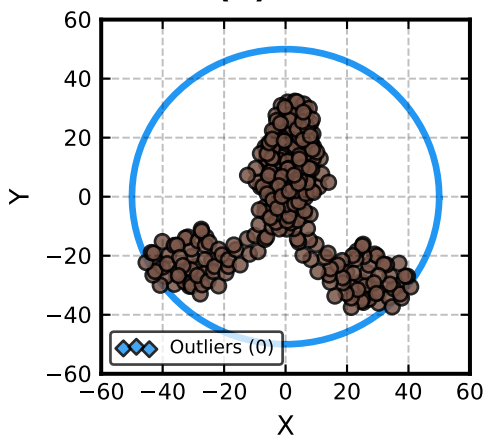

**(e)  $r = 0$**

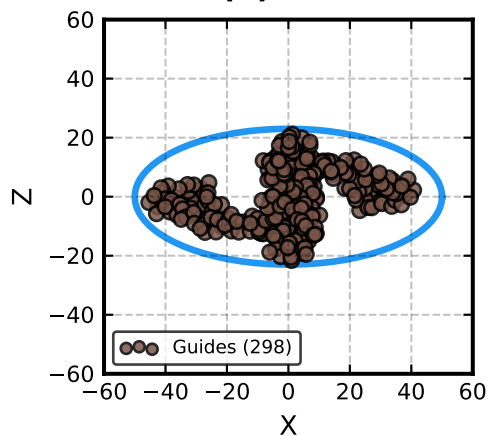

**(f)  $r = 0$**

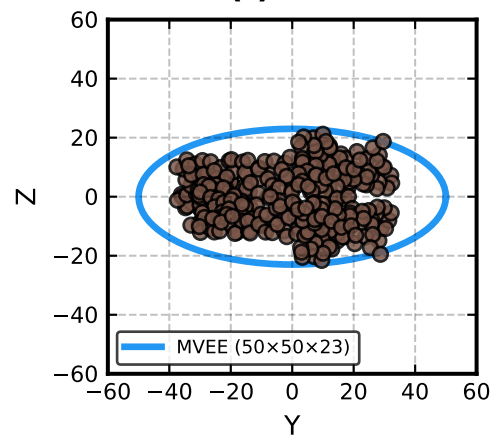

Supplement: s1 [file s1]
