# Supplementary material for: Improved Assessment of Globularity of Protein Structures and the Ellipsoid Profile of the Biological Assemblies from the PDB
Source: MDPI journal article supplement (doi:10.3390/biom13020385), 2023-02-17

**Figure S1. Endoglucanase A - 1IS9:A**

**(a)**

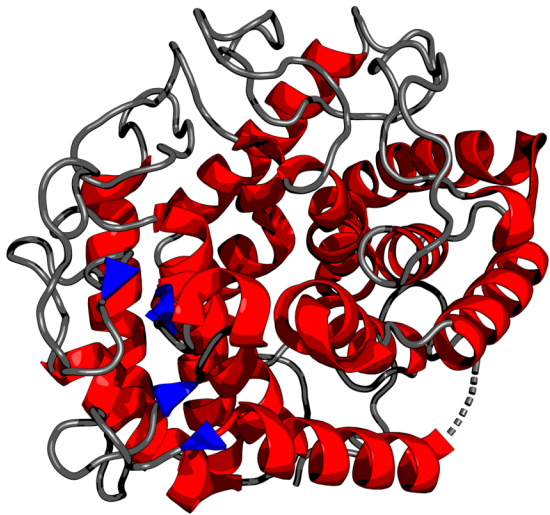

**(b)**

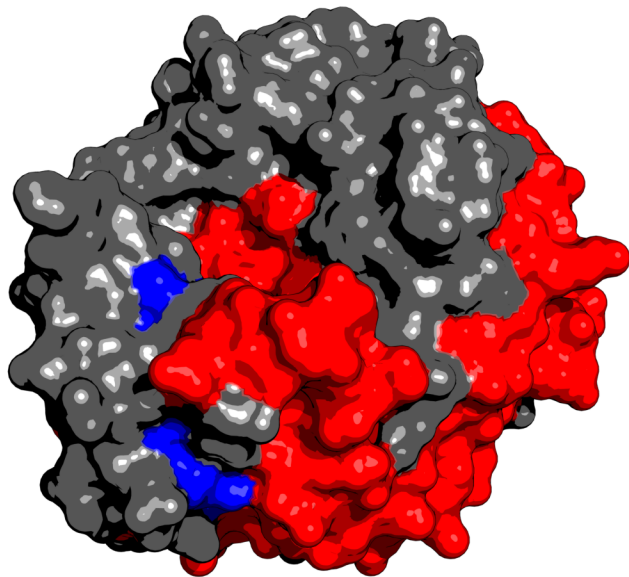

**Figure S2. Uncharacterized Protein - 3BPD:(A-G)**

**(a)**

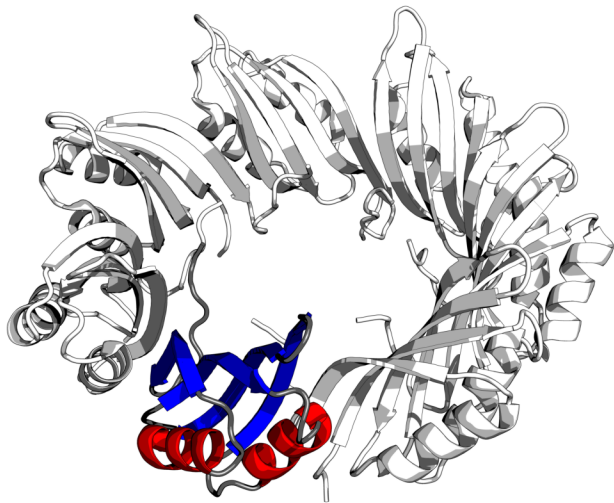

**(b)**

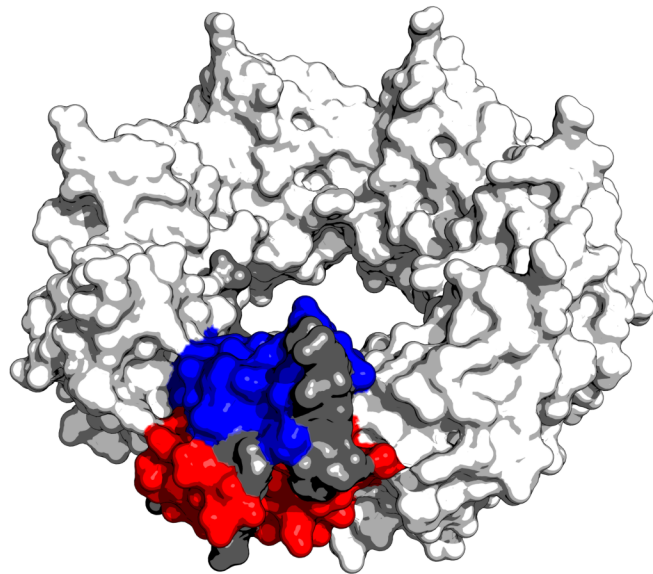

**Figure S3. dUTPase YncF - 4B0H:(A-C)**

**(a)**

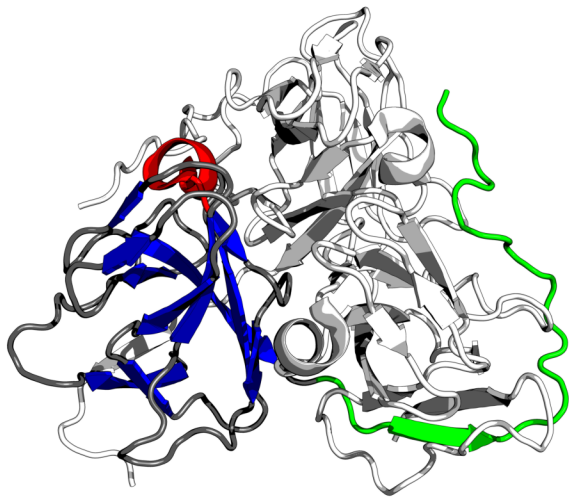

**(b)**

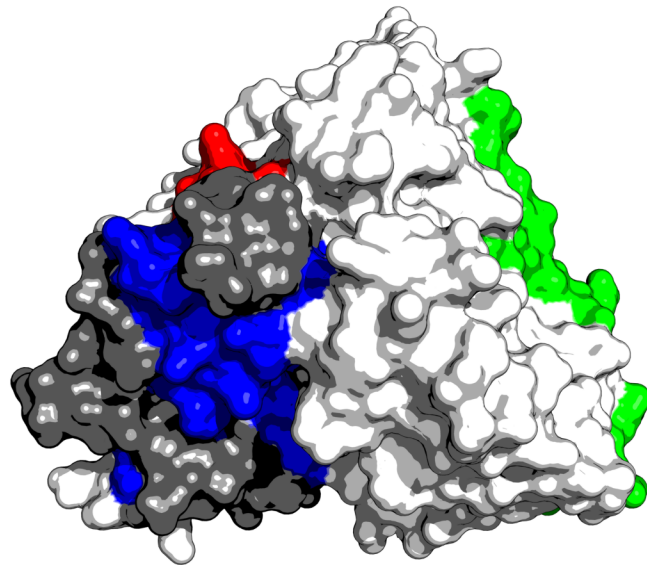

**Figure S4. HLA-DR Invariant Chain - 1IIE:(A-C)**

**(a)**

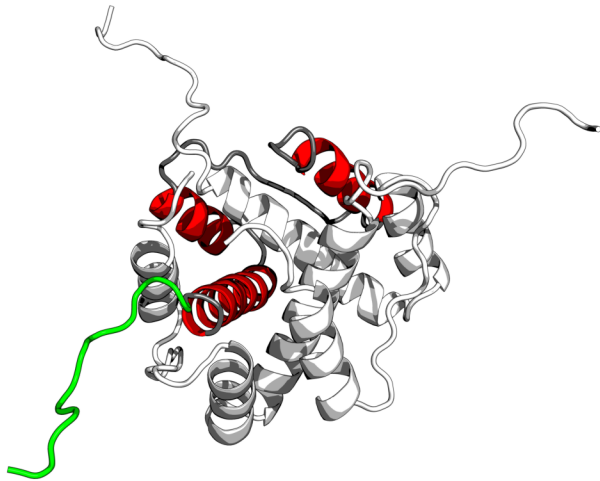

**(b)**

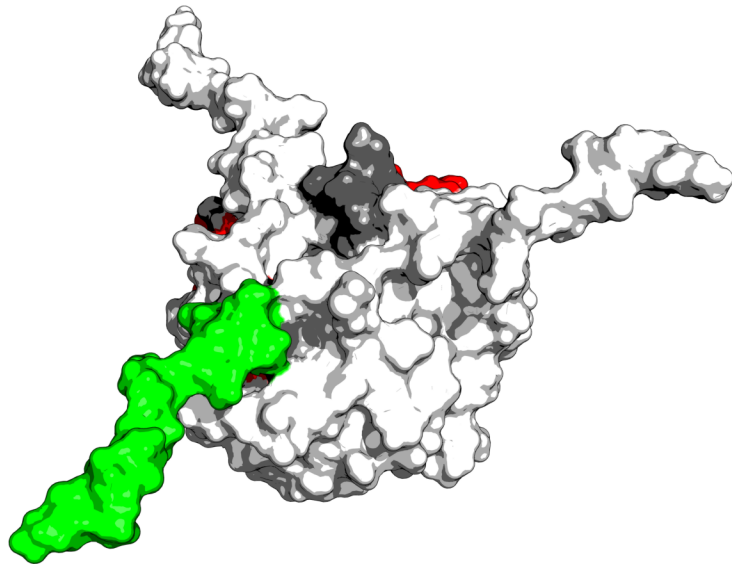

**Figure S5. Alpha Synuclein - 2KKW:A**

**(a)**

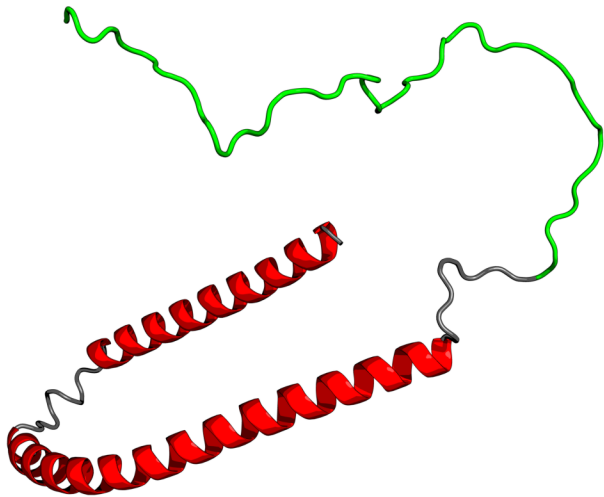

**(b)**

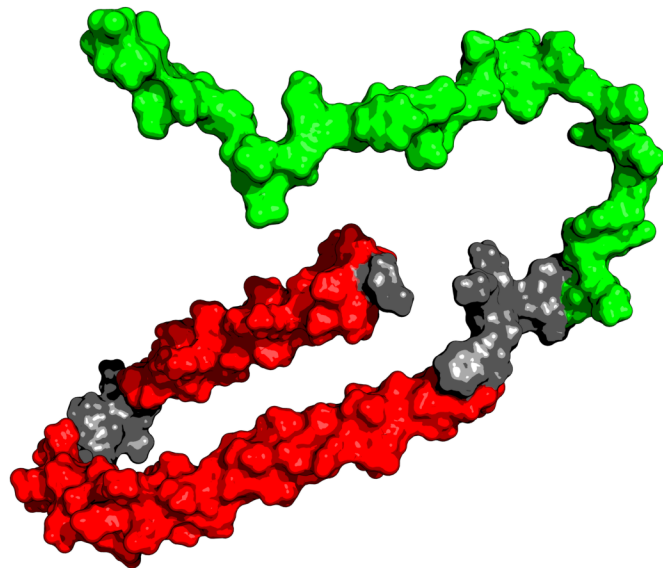

**Figure S6. Ribosomal Protein L9 - 1DIV:(A+B)**

**(a)**

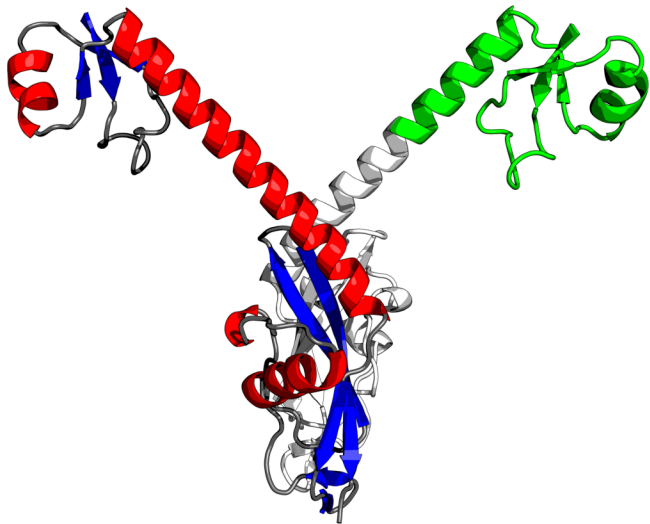

**(b)**

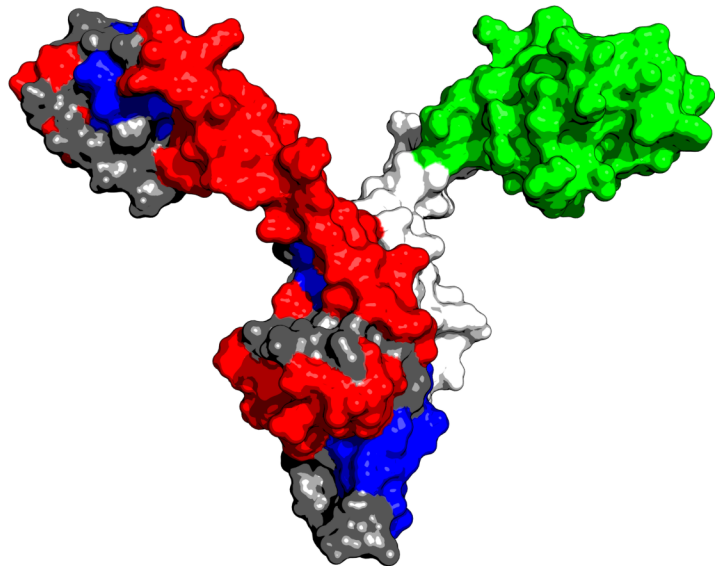

Supplement: s1 [file s1]
