# Supplementary material for: Improved Assessment of Globularity of Protein Structures and the Ellipsoid Profile of the Biological Assemblies from the PDB
Source: MDPI journal article supplement (doi:10.3390/biom13020385), 2023-02-17

**Figure S13. Endoglucanase A - 1IS9:A**

**(a)**  $r = 3$

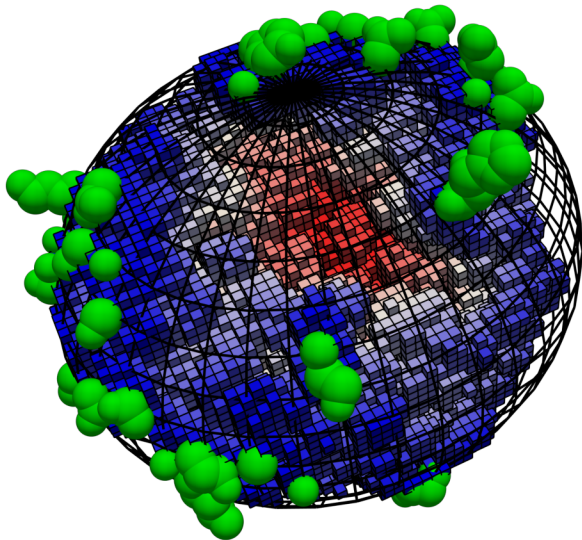

**(b)**  $r = 0$

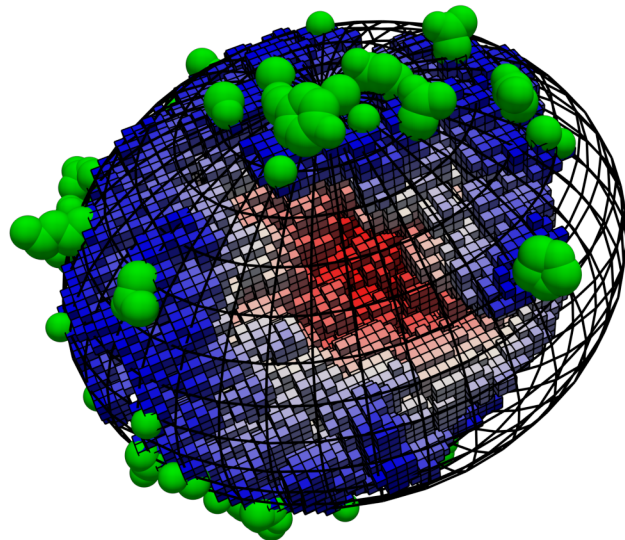

**Figure S14. Uncharacterized Protein - 3BPD:(A-G)**

**(a)**  $r = 3$

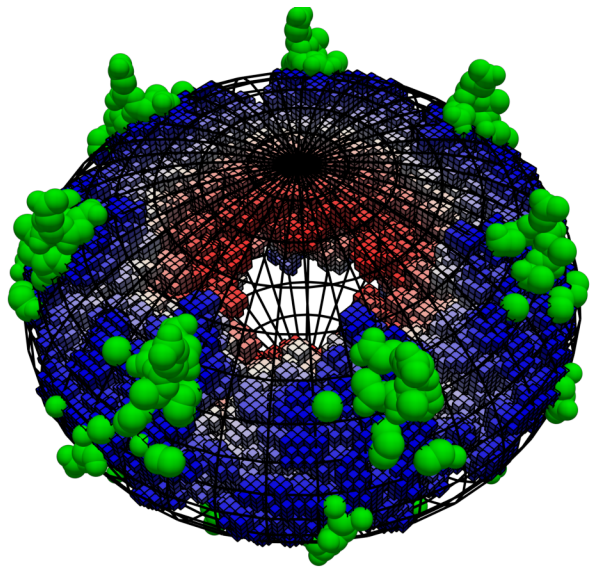

**(b)**  $r = 0$

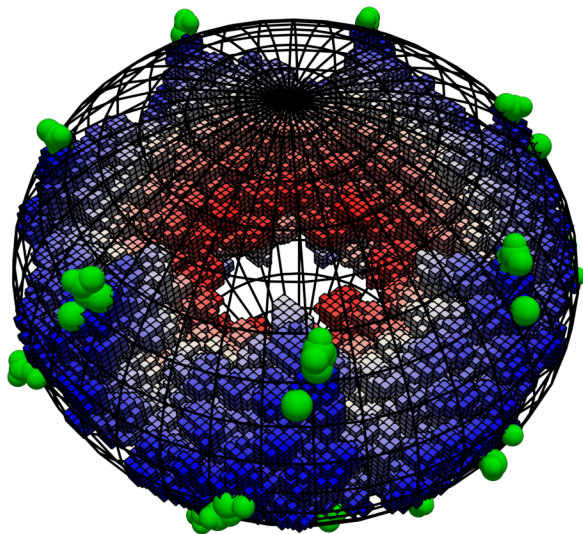

**Figure S15. dUTPase YncF - 4B0H:B**

**(a)**  $r = 3$

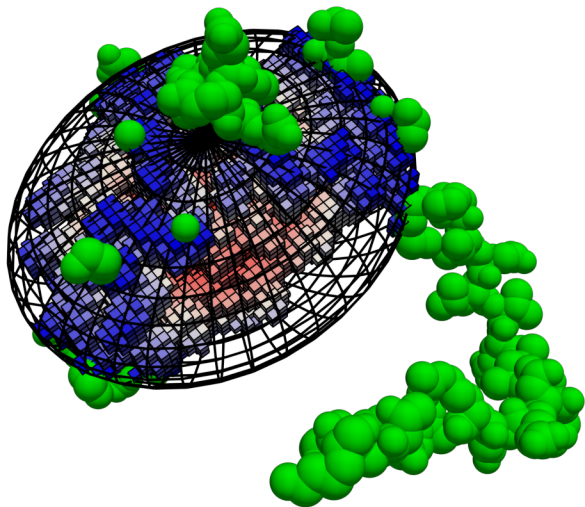

**(b)**  $r = 0$

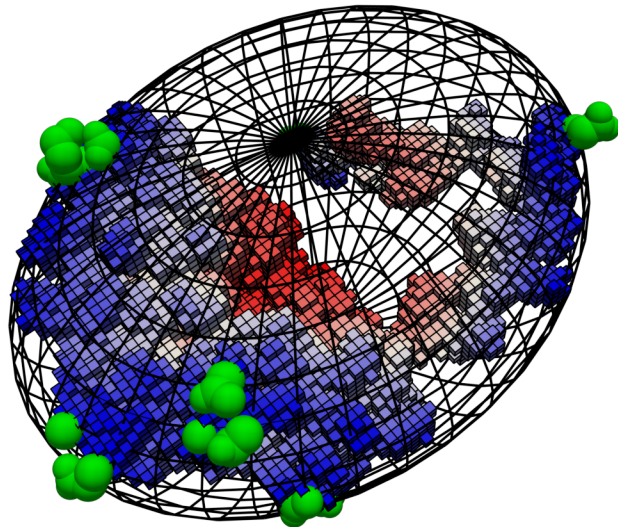

**Figure S16. HLA-DR Invariant Chain - 1IIE:(A-C)**

**(a)**  $r = 3$

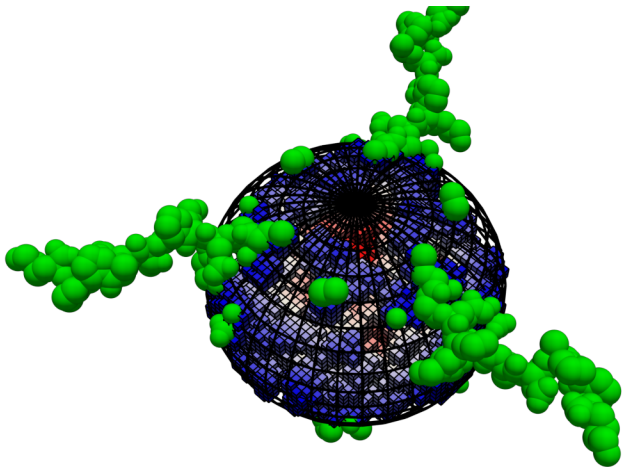

**(b)**  $r = 0$

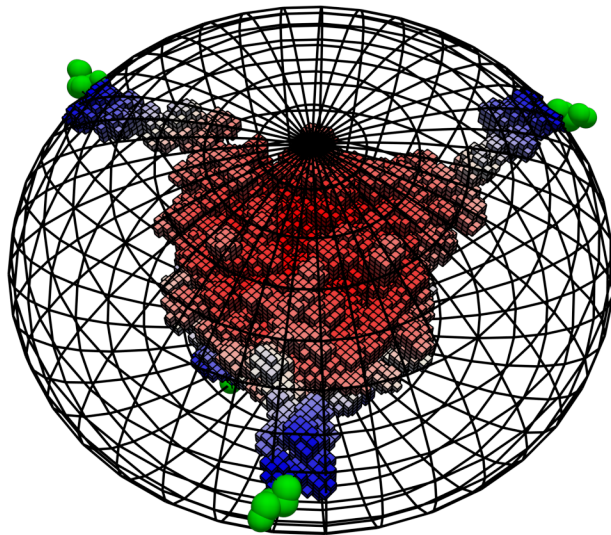



**Figure S17. Alpha Synuclein - 2KKW:A**

**(a)**  $r = 3$

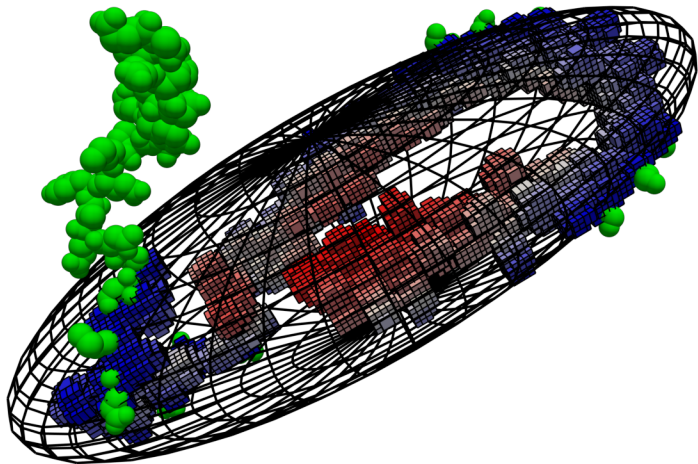

**(b)**  $r = 0$

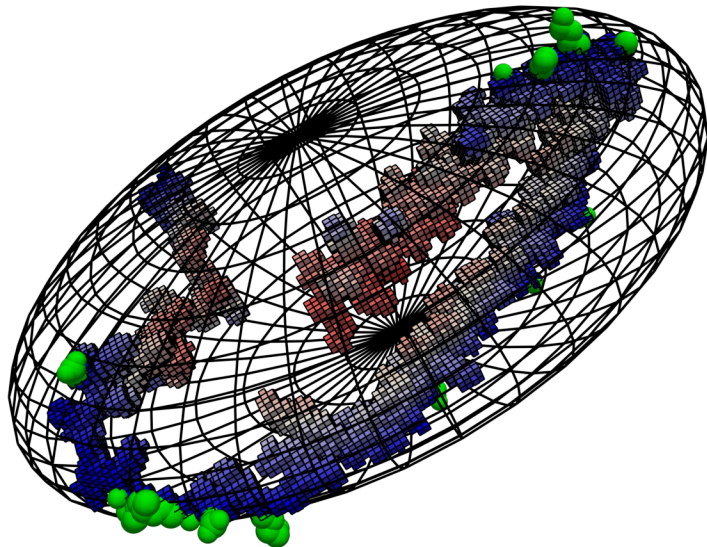

**Figure S18. Ribosomal Protein L9 - 1DIV:(A+B)**

**(a)**  $r = 3$

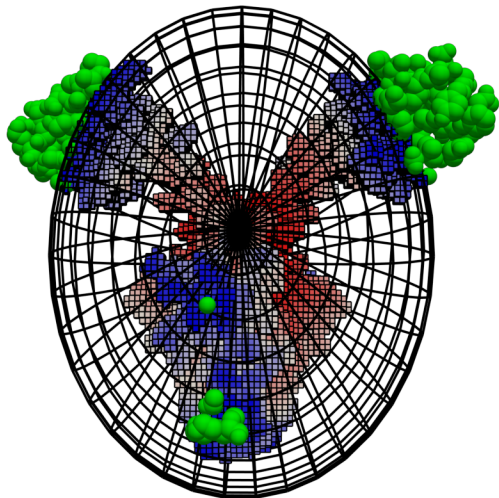

**(b)**  $r = 0$

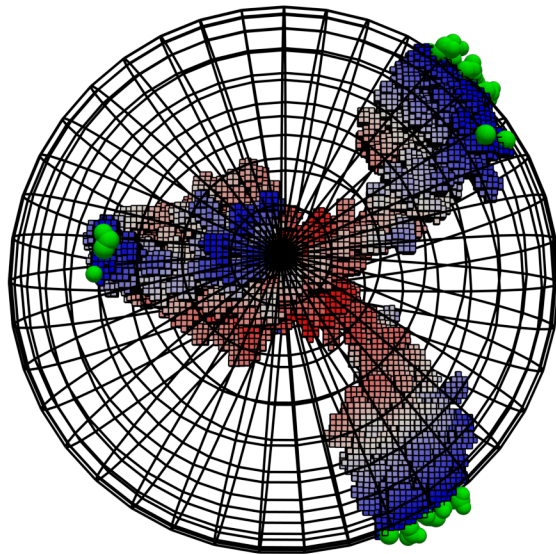

Supplement: s1 [file s1]
