# Supplementary material for: Improved Assessment of Globularity of Protein Structures and the Ellipsoid Profile of the Biological Assemblies from the PDB
Source: Biomolecules. 2023 Feb 17;13(2):385. doi: 10.3390/biom13020385 (PMC9953691; doi:10.3390/biom13020385)
Supplement: Supplementary file 1 [file biomolecules-13-00385-s001.zip]

Archive with 9 entries (9 files):
- s1.pdf
- s2.pdf
- s3.pdf
- s4.pdf
- s5.tsv
- s6.tsv
- s7.pdf
- s8.tsv
- s9.tsv
