# Supplementary material for: Improved Assessment of Globularity of Protein Structures and the Ellipsoid Profile of the Biological Assemblies from the PDB
Source: Biomolecules. 2023 Feb 17;13(2):385. doi: 10.3390/biom13020385 (PMC9953691; doi:10.3390/biom13020385)
Supplement: Supplementary file 1 [file biomolecules-13-00385-s001.zip › s5.tsv]

DOMAIN	EFFECTIVE	GUIDES	R_X	R_Y	R_Z	V	T	EI_0.3	EI_1.0	EP_0.1	EP_1.0	C_N	C_S	C_G	C_H	C_U	C_E	GROUP	FAMILY	SELECTION
d16vpa_	311	293	46	21	16	15.456	1.243	0.583	0.495	0.598	0.554	0	0	1	0	0	0	d	d.180.1.1	A
d1a02f_	53	52	52	6	5	1.560	4.727	0.807	0.640	0.848	0.739	0	0	1	1	0	1	h	h.1.3.1	F
d1a12a_	401	381	30	28	21	17.640	0.612	0.565	0.520	0.259	0.553	0	0	1	1	0	0	b	b.69.5.1	A
d1a1ia1	29	29	13	11	6	0.858	0.765	0.665	0.615	0.607	0.648	0	0	1	1	0	0	g	g.37.1.1	A(103-131)
d1a1xa_	106	99	21	18	12	4.536	0.700	0.634	0.523	0.439	0.578	0	0	1	1	0	0	b	b.63.1.1	A
d1a62a1	47	47	16	12	9	1.728	0.762	0.619	0.542	0.684	0.580	0	0	1	1	0	0	a	a.140.3.1	A(1-47)
d1a92a_	50	43	35	9	5	1.575	2.500	0.489	0.464	0.371	0.484	0	1	0	0	0	1	h	h.4.6.1	A
d1aa0a_	113	90	73	11	10	8.030	3.476	0.189	0.222	0.031	0.208	1	0	0	0	1	1	h	h.1.17.1	A
d1abva_	105	102	25	15	11	4.125	0.962	0.629	0.555	0.422	0.601	0	0	1	1	0	0	a	a.70.1.1	A
d1ad2a_	224	204	30	21	16	10.080	0.811	0.455	0.452	0.353	0.457	0	1	0	0	0	0	e	e.24.1.1	A
d1ae9a_	172	166	25	19	15	7.125	0.735	0.594	0.540	0.602	0.582	0	0	1	1	0	0	d	d.163.1.1	A
d1aepa_	153	149	33	15	12	5.940	1.222	0.571	0.543	0.550	0.567	0	0	1	1	0	0	a	a.63.1.1	A
d1af7a1	81	73	17	15	10	2.550	0.680	0.589	0.578	0.453	0.589	0	0	1	1	0	0	a	a.58.1.1	A(11-91)
d1afa12	32	32	32	5	4	0.640	3.556	0.862	0.732	0.849	0.816	0	0	1	1	0	1	h	h.1.1.1	1(73-104)
d1afpa_	51	51	18	11	8	1.584	0.947	0.709	0.609	0.724	0.663	0	0	1	1	0	0	g	g.26.1.1	A
d1aik.1	70	60	34	10	7	2.380	2.000	0.674	0.560	0.501	0.623	0	0	1	1	0	1	h	h.3.2.1	N+C
d1akya2	38	38	14	12	8	1.344	0.700	0.653	0.555	0.501	0.610	0	0	1	1	0	0	g	g.41.2.1	A(131-168)
d1ansa_	27	25	11	7	6	0.462	0.846	0.742	0.686	0.656	0.709	0	0	1	1	0	0	g	g.11.1.1	A
d1aola_	228	209	30	22	15	9.900	0.811	0.613	0.513	0.514	0.575	0	0	1	1	0	0	b	b.20.1.1	A
d1aq5a1	43	38	37	5	5	0.925	3.700	0.828	0.696	0.893	0.773	0	0	1	1	0	1	h	h.1.6.1	A(5-47)
d1auua_	55	50	16	11	9	1.584	0.800	0.642	0.583	0.626	0.617	0	0	1	1	0	0	b	b.35.2.1	A
d1av1a1	200	191	71	50	29	102.950	0.899	0.000	0.026	0.000	0.011	1	0	0	0	1	0	h	h.5.1.1	A(44-243)
d1ayoa_	130	127	25	16	14	5.600	0.833	0.605	0.518	0.425	0.567	0	0	1	1	0	0	b	b.1.29.1	A
d1b0na1	35	35	19	14	7	1.862	0.905	0.429	0.405	0.533	0.426	0	1	0	0	0	0	a	a.34.1.1	A(74-108)
d1b25a1	401	373	34	30	21	21.420	0.667	0.545	0.456	0.612	0.512	0	0	1	0	0	0	a	a.110.1.1	A(211-619)
d1b25a2	210	207	24	21	17	8.568	0.632	0.621	0.557	0.589	0.600	0	0	1	1	0	0	d	d.152.1.1	A(1-210)
d1b33n_	67	62	27	11	8	2.376	1.421	0.610	0.523	0.466	0.572	0	0	1	1	0	0	d	d.30.1.1	N
d1b67a_	68	67	27	12	9	2.916	1.286	0.346	0.382	0.137	0.360	0	1	0	0	1	0	a	a.22.1.2	A
d1b79a_	102	102	20	15	14	4.200	0.690	0.617	0.568	0.564	0.608	0	0	1	1	0	0	a	a.81.1.1	A
d1bbga_	40	39	14	10	6	0.840	0.875	0.601	0.619	0.898	0.620	0	0	1	1	1	0	g	g.6.1.1	A
d1bcoa1	80	76	20	15	10	3.000	0.800	0.611	0.531	0.477	0.577	0	0	1	1	0	0	b	b.48.1.1	A(481-560)
d1bg1a1	177	169	47	15	12	8.460	1.741	0.606	0.514	0.462	0.568	0	0	1	1	0	0	a	a.47.1.1	A(136-321)
d1bg8a_	76	67	17	13	12	2.652	0.680	0.627	0.560	0.482	0.604	0	0	1	1	0	0	a	a.57.1.1	A
d1bgfa_	124	113	23	19	12	5.244	0.742	0.586	0.512	0.654	0.556	0	0	1	1	0	0	a	a.90.1.1	A
d1bi6h1	24	24	11	8	6	0.528	0.786	0.763	0.704	0.300	0.726	0	0	1	1	0	0	g	g.3.12.1	H(8-31)
d1bkra_	108	106	18	17	14	4.284	0.581	0.613	0.576	0.652	0.611	0	0	1	1	0	0	a	a.40.1.1	A
d1bm8a_	99	99	18	16	13	3.744	0.621	0.596	0.566	0.716	0.593	0	0	1	1	0	0	d	d.34.1.1	A
d1boua_	132	119	27	20	11	5.940	0.871	0.472	0.439	0.412	0.461	0	1	0	0	0	0	a	a.88.1.1	A
d1boub_	298	293	26	23	22	13.156	0.578	0.606	0.534	0.627	0.583	0	0	1	1	0	0	c	c.56.6.1	B
d1bx7a_	51	47	25	10	6	1.500	1.562	0.623	0.536	0.670	0.585	0	0	1	1	0	0	g	g.3.15.1	A
d1byia_	224	212	27	21	18	10.206	0.692	0.581	0.495	0.550	0.550	0	0	1	0	0	0	c	c.37.1.10	A
d1c17m_	142	133	35	16	12	6.720	1.250	0.476	0.448	0.383	0.467	0	1	0	0	0	0	f	f.18.1.1	M
d1c1ga_	284	269	245	19	9	41.895	8.750	0.156	0.142	0.120	0.147	1	0	0	0	0	1	h	h.1.5.1	A
d1c1ka_	217	214	36	20	16	11.520	1.000	0.596	0.499	0.567	0.560	0	0	1	0	0	0	a	a.120.1.1	A
d1c5ea_	95	91	19	16	12	3.648	0.679	0.613	0.523	0.753	0.578	0	0	1	1	0	0	b	b.85.2.1	A
d1c75a_	71	71	14	13	12	2.184	0.560	0.463	0.524	0.222	0.492	0	1	0	0	1	0	a	a.3.1.1	A
d1ca4a2	16	16	16	4	3	0.192	2.286	0.878	0.803	0.815	0.841	0	0	1	1	0	1	h	h.1.2.1	A(334-349)
d1cbha_	36	33	14	9	4	0.504	1.077	0.724	0.702	0.878	0.721	0	0	1	1	0	0	g	g.3.8.1	A
d1cc7a_	72	71	20	12	10	2.400	0.909	0.560	0.574	0.362	0.580	0	0	1	1	1	0	d	d.58.17.1	A
d1ccwa_	137	130	20	18	14	5.040	0.625	0.566	0.544	0.635	0.566	0	0	1	1	0	0	c	c.23.6.1	A
d1cfza_	162	153	22	21	14	6.468	0.629	0.582	0.538	0.658	0.574	0	0	1	1	0	0	c	c.56.1.1	A
d1chda_	198	191	22	19	18	7.524	0.595	0.600	0.556	0.703	0.592	0	0	1	1	0	0	c	c.40.1.1	A
d1ciia2	428	385	132	18	14	33.264	4.125	0.321	0.286	0.122	0.305	1	0	0	0	0	1	h	h.4.3.1	A(23-450)
d1cipa1	121	118	25	16	11	4.400	0.926	0.595	0.562	0.612	0.588	0	0	1	1	0	0	a	a.66.1.1	A(61-181)
d1co4a_	42	36	16	10	9	1.440	0.842	0.577	0.491	0.487	0.533	0	0	1	0	0	0	g	g.47.1.1	A
d1cola_	197	196	24	18	18	7.776	0.667	0.574	0.550	0.508	0.575	0	0	1	1	0	0	f	f.1.1.1	A
d1cq3a_	224	206	29	20	15	8.700	0.829	0.596	0.532	0.606	0.578	0	0	1	1	0	0	b	b.27.1.1	A
d1crua_	448	438	33	29	22	21.054	0.647	0.564	0.511	0.593	0.552	0	0	1	1	0	0	b	b.68.2.1	A
d1cuka1	48	48	15	11	9	1.485	0.750	0.590	0.533	0.284	0.568	0	0	1	1	0	0	a	a.5.1.1	A(156-203)
d1cxzb_	86	80	36	12	7	3.024	1.895	0.600	0.561	0.647	0.592	0	0	1	1	0	0	a	a.2.6.1	B
d1d0qa_	102	99	27	14	10	3.780	1.125	0.610	0.563	0.533	0.603	0	0	1	1	0	0	g	g.41.3.2	A
d1d1ra1	81	78	20	16	12	3.840	0.714	0.518	0.449	0.512	0.495	0	0	1	0	0	0	d	d.64.1.1	A(29-109)
d1d3ya_	289	273	35	26	16	14.560	0.833	0.539	0.452	0.585	0.504	0	0	1	0	0	0	e	e.12.1.1	A
d1d6ga_	47	46	23	11	8	2.024	1.211	0.470	0.436	0.457	0.463	0	1	0	0	0	0	g	g.33.1.1	A
d1d7ma_	101	82	70	10	7	4.900	4.118	0.381	0.353	0.194	0.370	0	1	0	0	0	1	h	h.1.10.1	A
d1dcea2	109	99	23	13	13	3.887	0.885	0.624	0.562	0.571	0.603	0	0	1	1	0	0	b	b.7.4.1	A(242-350)
d1dcsa_	279	266	31	23	20	14.260	0.721	0.563	0.477	0.653	0.535	0	0	1	0	0	0	b	b.82.2.1	A
d1dd9a_	310	286	41	22	18	16.236	1.025	0.556	0.451	0.497	0.512	0	0	1	0	0	0	e	e.13.1.1	A
d1deba_	54	50	50	5	5	1.250	5.000	0.861	0.695	0.818	0.790	0	0	1	1	0	1	h	h.1.18.1	A
d1dfup_	94	89	19	17	11	3.553	0.679	0.606	0.545	0.569	0.587	0	0	1	1	0	0	b	b.53.1.1	P
d1di2a_	69	64	24	11	8	2.112	1.263	0.649	0.580	0.470	0.623	0	0	1	1	0	0	d	d.50.1.1	A
d1dipa_	77	61	43	17	7	5.117	1.792	0.269	0.256	0.123	0.263	1	0	0	0	0	0	h	h.1.12.1	A
d1diva1	94	92	27	13	11	3.861	1.125	0.585	0.530	0.485	0.564	0	0	1	1	0	0	d	d.99.1.1	A(56-149)
d1dj0a_	264	250	34	21	16	11.424	0.919	0.575	0.512	0.540	0.551	0	0	1	1	0	0	d	d.265.1.1	A
d1dk8a_	147	124	29	15	12	5.220	1.074	0.627	0.552	0.581	0.599	0	0	1	1	0	0	a	a.91.1.1	A
d1dkga1	59	59	23	9	8	1.656	1.353	0.633	0.580	0.582	0.611	0	0	1	1	0	0	b	b.73.1.1	A(139-197)
d1dkga2	99	79	65	9	5	2.925	4.643	0.521	0.494	0.614	0.518	0	0	1	0	0	1	h	h.1.9.1	A(34-138)
d1dl5a2	104	101	23	15	13	4.485	0.821	0.629	0.533	0.519	0.587	0	0	1	1	0	0	d	d.197.1.1	A(214-317)
d1dmga_	172	156	28	17	15	7.140	0.875	0.598	0.524	0.584	0.565	0	0	1	1	0	0	c	c.22.1.1	A
d1dpjb_	29	28	27	5	4	0.540	3.000	0.817	0.729	0.957	0.789	0	0	1	1	0	1	a	a.137.7.1	B
d1dqca_	73	69	20	13	10	2.600	0.870	0.648	0.544	0.727	0.603	0	0	1	1	0	0	g	g.31.1.1	A
d1dtdb_	61	61	17	13	10	2.210	0.739	0.635	0.557	0.769	0.601	0	0	1	1	0	0	g	g.30.1.1	B
d1dvka_	149	138	23	18	16	6.624	0.676	0.613	0.523	0.508	0.576	0	0	1	1	0	0	a	a.72.1.1	A
d1dvoa_	152	131	38	20	11	8.360	1.226	0.469	0.387	0.380	0.437	0	1	0	0	0	0	a	a.136.1.1	A
d1dzfa1	139	131	24	22	12	6.336	0.706	0.596	0.505	0.645	0.563	0	0	1	1	0	0	c	c.52.3.1	A(5-143)
d1dzfa2	72	70	20	15	10	3.000	0.800	0.611	0.486	0.663	0.550	0	0	1	0	0	0	d	d.78.1.1	A(144-215)
d1e19a_	313	290	31	26	20	16.120	0.674	0.517	0.439	0.545	0.483	0	0	1	0	0	0	c	c.73.1.1	A
d1e2aa_	102	95	30	12	10	3.600	1.364	0.594	0.545	0.473	0.578	0	0	1	1	0	0	a	a.7.2.1	A
d1e2wa1	187	175	34	18	14	8.568	1.062	0.586	0.505	0.644	0.554	0	0	1	1	0	0	b	b.2.6.1	A(1-168,233-251)
d1e44b_	96	86	19	15	13	3.705	0.679	0.599	0.498	0.743	0.558	0	0	1	0	0	0	b	b.101.1.1	B
d1e7la1	54	54	18	12	10	2.160	0.818	0.628	0.563	0.785	0.610	0	0	1	1	0	0	a	a.140.4.1	A(104-157)
d1e8pa_	46	43	12	11	10	1.320	0.571	0.726	0.608	0.853	0.671	0	0	1	1	0	0	g	g.55.1.1	A
d1e8ra1	49	43	13	11	8	1.144	0.684	0.738	0.659	0.809	0.715	0	0	1	1	0	0	g	g.29.1.1	A(21-69)
d1eb6a_	177	176	25	17	16	6.800	0.758	0.598	0.563	0.726	0.598	0	0	1	1	0	0	d	d.92.1.12	A
d1ecia_	37	35	15	10	8	1.200	0.833	0.579	0.533	0.662	0.557	0	0	1	1	0	0	a	a.33.1.1	A
d1ecwa_	114	104	19	16	14	4.256	0.633	0.591	0.540	0.786	0.581	0	0	1	1	0	0	a	a.61.1.1	A
d1ef1c_	90	78	33	23	7	5.313	1.100	0.420	0.307	0.480	0.366	0	1	0	0	0	0	a	a.137.5.1	C
d1egwa_	71	57	27	14	7	2.646	1.286	0.569	0.477	0.489	0.530	0	0	1	0	0	0	d	d.88.1.1	A
d1ehsa_	48	45	21	11	6	1.386	1.235	0.617	0.581	0.386	0.600	0	0	1	1	0	0	g	g.2.1.1	A
d1ei5a1	82	77	18	14	10	2.520	0.750	0.616	0.578	0.587	0.599	0	0	1	1	0	0	b	b.61.3.1	A(336-417)
d1eiwa_	111	108	19	18	14	4.788	0.594	0.503	0.470	0.666	0.500	0	0	1	0	0	0	c	c.23.3.1	A
d1ej5a_	107	87	20	16	11	3.520	0.741	0.645	0.548	0.645	0.605	0	0	1	1	0	0	a	a.68.1.1	A
d1el6a_	208	186	40	29	13	15.080	0.952	0.308	0.280	0.190	0.291	1	0	0	0	0	0	d	d.182.1.1	A
d1elka_	153	143	23	19	13	5.681	0.719	0.619	0.575	0.596	0.603	0	0	1	1	0	0	a	a.118.9.2	A
d1em8b_	110	102	21	14	13	3.822	0.778	0.595	0.537	0.672	0.577	0	0	1	1	0	0	c	c.126.1.1	B
d1enwa_	114	95	28	17	12	5.712	0.966	0.547	0.398	0.638	0.482	0	0	1	0	0	0	a	a.5.4.1	A
d1eo8b_	175	150	59	15	11	9.735	2.269	0.500	0.389	0.637	0.455	0	0	1	0	0	1	h	h.3.1.1	B
d1epwa4	328	297	64	18	14	16.128	2.000	0.599	0.486	0.672	0.555	0	0	1	0	0	1	h	h.4.2.1	A(534-861)
d1eq7a_	56	53	51	6	4	1.224	5.100	0.724	0.631	0.764	0.693	0	0	1	1	0	1	h	h.1.16.1	A
d1eu1a1	155	135	22	18	17	6.732	0.629	0.610	0.480	0.554	0.553	0	0	1	0	0	0	b	b.52.2.2	A(626-780)
d1eu1a2	612	598	44	33	24	34.848	0.772	0.466	0.420	0.427	0.450	0	1	0	0	0	0	c	c.81.1.1	A(4-625)
d1ewfa1	217	198	51	14	13	9.282	1.889	0.527	0.493	0.440	0.524	0	0	1	0	0	0	d	d.83.1.1	A(1-217)
d1eyfa_	92	77	25	14	12	4.200	0.962	0.586	0.437	0.748	0.517	0	0	1	0	0	0	g	g.48.1.1	A
d1ezga_	82	82	22	11	8	1.936	1.158	0.657	0.646	0.773	0.663	0	0	1	1	0	0	b	b.80.2.1	A
d1ezja_	114	93	66	15	6	5.940	3.143	0.510	0.376	0.650	0.454	0	0	1	0	0	1	h	h.1.14.1	A
d1f00i1	95	93	25	13	10	3.250	1.087	0.609	0.549	0.507	0.583	0	0	1	1	0	0	b	b.1.14.1	I(658-752)
d1f0la1	155	145	24	16	14	5.376	0.800	0.598	0.552	0.466	0.579	0	0	1	1	0	0	b	b.2.1.1	A(381-535)
d1f0la3	178	172	24	19	17	7.752	0.667	0.603	0.526	0.620	0.579	0	0	1	1	0	0	f	f.1.2.1	A(201-380)
d1f32a_	127	118	31	17	11	5.797	1.107	0.601	0.484	0.584	0.556	0	0	1	0	0	0	d	d.62.1.1	A
d1f35a_	162	153	31	19	13	7.657	0.969	0.596	0.483	0.589	0.543	0	0	1	0	0	0	b	b.94.1.1	A
d1f3ua_	118	109	33	20	12	7.920	1.031	0.365	0.325	0.117	0.346	0	1	0	0	0	0	b	b.65.1.1	A
d1f3va_	158	148	22	19	14	5.852	0.667	0.590	0.544	0.457	0.569	0	0	1	1	0	0	d	d.58.22.1	A
d1f44a1	110	102	23	16	14	5.152	0.767	0.613	0.499	0.565	0.563	0	0	1	0	0	0	a	a.60.9.1	A(20-129)
d1f46a_	139	134	26	20	12	6.240	0.812	0.618	0.519	0.643	0.581	0	0	1	1	0	0	d	d.129.4.1	A
d1f5na1	300	260	73	19	11	15.257	2.433	0.529	0.424	0.580	0.484	0	0	1	0	0	1	a	a.114.1.1	A(284-583)
d1f6va1	90	80	19	17	9	2.907	0.731	0.676	0.552	0.640	0.615	0	0	1	1	0	0	a	a.49.1.1	A(2-91)
d1f7ua3	134	122	25	16	13	5.200	0.862	0.632	0.539	0.609	0.593	0	0	1	1	0	0	d	d.67.2.1	A(2-135)
d1f86a_	115	109	25	15	12	4.500	0.926	0.592	0.543	0.543	0.574	0	0	1	1	0	0	b	b.3.4.1	A
d1fbma_	46	43	42	6	5	1.260	3.818	0.768	0.631	0.869	0.716	0	0	1	1	0	1	h	h.1.7.1	A
d1fdma_	50	40	25	12	7	2.100	1.316	0.338	0.351	0.046	0.338	0	1	0	0	1	0	h	h.1.4.1	A
d1fe6a1	49	47	45	6	4	1.080	4.500	0.820	0.703	0.832	0.770	0	0	1	1	0	1	h	h.1.19.1	A(3-51)
d1fjgc2	101	92	24	13	10	3.120	1.043	0.602	0.582	0.522	0.598	0	0	1	1	0	0	d	d.53.1.1	C(107-207)
d1fjgj_	98	92	39	12	10	4.680	1.773	0.555	0.461	0.661	0.524	0	0	1	0	0	0	d	d.58.15.1	J
d1fjgr_	73	66	17	14	11	2.618	0.680	0.636	0.542	0.670	0.592	0	0	1	1	0	0	a	a.4.8.1	R
d1fjgs_	84	70	19	16	11	3.344	0.704	0.592	0.506	0.599	0.556	0	0	1	1	0	0	d	d.28.1.1	S
d1fjgt_	99	94	35	12	10	4.200	1.591	0.583	0.490	0.482	0.541	0	0	1	0	0	0	a	a.7.6.1	T
d1fjra_	188	176	31	20	16	9.920	0.861	0.588	0.466	0.688	0.541	0	0	1	0	0	0	b	b.102.1.1	A
d1fk5a_	93	93	20	14	12	3.360	0.769	0.443	0.503	0.363	0.478	0	1	0	0	1	0	a	a.52.1.1	A
d1fm0d_	81	77	17	13	12	2.652	0.680	0.598	0.567	0.647	0.580	0	0	1	1	0	0	d	d.15.3.1	D
d1fm0e_	142	131	27	16	13	5.616	0.931	0.535	0.506	0.446	0.524	0	0	1	1	0	0	d	d.41.5.1	E
d1fn9a_	365	351	42	22	19	17.556	1.024	0.587	0.504	0.651	0.557	0	0	1	1	0	0	d	d.196.1.1	A
d1fpoa2	95	86	30	13	10	3.900	1.304	0.615	0.535	0.611	0.583	0	0	1	1	0	0	a	a.23.1.1	A(77-171)
d1fs1a1	41	40	14	11	8	1.232	0.737	0.621	0.578	0.670	0.595	0	0	1	1	0	0	a	a.158.1.1	A(109-149)
d1fs1b1	55	50	20	12	10	2.400	0.909	0.573	0.454	0.579	0.519	0	0	1	0	0	0	a	a.157.1.1	B(86-140)
d1fsga1	230	220	29	20	17	9.860	0.784	0.558	0.524	0.701	0.554	0	0	1	1	0	0	c	c.61.1.1	A(1-230)
d1ftra1	148	129	25	18	16	7.200	0.735	0.509	0.420	0.407	0.468	0	0	1	0	0	0	d	d.58.33.1	A(1-148)
d1fu1a2	61	59	57	5	5	1.425	5.700	0.848	0.698	0.836	0.782	0	0	1	1	0	1	h	h.1.11.1	A(118-178)
d1fxka_	107	95	44	11	9	4.356	2.200	0.583	0.490	0.639	0.539	0	0	1	0	0	1	a	a.2.5.1	A
d1fzaa_	85	71	42	12	7	3.528	2.211	0.572	0.464	0.510	0.527	0	0	1	0	0	1	h	h.1.8.1	A
d1g1ia_	43	42	41	6	5	1.230	3.727	0.758	0.621	0.834	0.707	0	0	1	1	0	1	h	h.1.13.1	A
d1g2ra_	94	85	19	15	13	3.705	0.679	0.616	0.520	0.625	0.576	0	0	1	1	0	0	d	d.192.1.1	A
d1g2ya_	31	28	18	11	4	0.792	1.200	0.588	0.553	0.673	0.583	0	0	1	1	0	0	a	a.34.2.1	A
d1g3pa1	65	56	18	12	7	1.512	0.947	0.687	0.637	0.745	0.669	0	0	1	1	0	0	b	b.37.1.1	A(1-65)
d1g4ia_	123	121	23	20	11	5.060	0.742	0.583	0.534	0.643	0.570	0	0	1	1	0	0	a	a.133.1.2	A
d1g5ga1	265	222	43	26	14	15.652	1.075	0.387	0.334	0.282	0.374	0	1	0	0	0	0	f	f.12.1.1	A(33-66,224-454)
d1g6xa_	58	56	19	12	9	2.052	0.905	0.652	0.586	0.572	0.631	0	0	1	1	0	0	g	g.8.1.1	A
d1g73a_	157	145	52	13	8	5.408	2.476	0.611	0.556	0.694	0.590	0	0	1	1	0	1	a	a.7.4.1	A
d1g7sa3	131	110	21	17	14	4.998	0.677	0.598	0.509	0.645	0.563	0	0	1	1	0	0	c	c.20.1.1	A(329-459)
d1g8ea_	98	85	26	21	14	7.644	0.743	0.186	0.236	0.029	0.210	1	0	0	0	1	0	a	a.145.1.1	A
d1gcia_	269	265	23	21	19	9.177	0.575	0.617	0.572	0.677	0.604	0	0	1	1	0	0	c	c.41.1.1	A
d1gd8a_	105	98	26	14	11	4.004	1.040	0.591	0.551	0.490	0.576	0	0	1	1	0	0	d	d.188.1.1	A
d1gh9a_	71	60	24	14	10	3.360	1.000	0.568	0.416	0.792	0.504	0	0	1	0	0	0	g	g.41.6.1	A
d1ghha_	81	80	22	16	11	3.872	0.815	0.482	0.454	0.327	0.475	0	1	0	0	0	0	d	d.57.1.1	A
d1gk4a_	79	69	70	6	5	2.100	6.364	0.723	0.607	0.869	0.682	0	0	1	1	0	1	h	h.1.20.1	A
d1gkma_	507	465	52	21	21	22.932	1.238	0.599	0.486	0.717	0.550	0	0	1	0	0	0	a	a.127.1.2	A
d1gl2a_	54	48	47	7	4	1.316	4.273	0.700	0.609	0.775	0.673	0	0	1	1	0	1	h	h.1.15.1	A
d1gm5a1	99	84	22	15	13	4.290	0.786	0.542	0.489	0.466	0.529	0	0	1	0	0	0	a	a.24.21.1	A(7-105)
d1gmja_	65	61	56	7	6	2.352	4.308	0.594	0.516	0.619	0.568	0	0	1	1	0	1	h	h.4.8.1	A
d1gmua1	70	70	15	14	13	2.730	0.556	0.573	0.534	0.640	0.563	0	0	1	1	0	0	b	b.107.1.1	A(1-70)
d1gmua2	68	64	15	14	11	2.310	0.600	0.615	0.570	0.439	0.605	0	0	1	1	0	0	d	d.58.38.1	A(71-138)
d1gmxa_	108	104	20	16	13	4.160	0.690	0.610	0.562	0.625	0.597	0	0	1	1	0	0	c	c.46.1.3	A
d1go3e2	78	72	25	11	10	2.750	1.190	0.572	0.535	0.618	0.561	0	0	1	1	0	0	d	d.230.1.1	E(1-78)
d1go4e_	87	74	68	16	11	11.968	2.519	0.137	0.153	0.137	0.152	1	0	0	0	1	1	h	h.1.22.1	E
d1goia1	52	51	16	10	9	1.440	0.842	0.676	0.628	0.858	0.666	0	0	1	1	0	0	b	b.72.2.1	A(447-498)
d1gpja1	97	90	44	14	8	4.928	2.000	0.523	0.416	0.695	0.477	0	0	1	0	0	1	a	a.151.1.1	A(303-404)
d1gpja3	143	138	20	19	16	6.080	0.571	0.595	0.533	0.591	0.581	0	0	1	1	0	0	d	d.58.39.1	A(1-143)
d1gqea_	362	305	36	30	18	19.440	0.750	0.539	0.406	0.538	0.482	0	0	1	0	0	0	e	e.38.1.1	A
d1gqia2	147	137	22	18	15	5.940	0.667	0.603	0.540	0.536	0.585	0	0	1	1	0	0	d	d.92.2.2	A(5-151)
d1gs9a_	144	139	37	15	11	6.105	1.423	0.602	0.545	0.600	0.584	0	0	1	1	0	0	a	a.24.1.1	A
d1gvna_	88	85	29	13	10	3.770	1.261	0.608	0.531	0.630	0.580	0	0	1	1	0	0	a	a.8.2.1	A
d1gwea_	498	412	36	28	22	22.176	0.720	0.563	0.476	0.448	0.530	0	0	1	0	0	0	e	e.5.1.1	A
d1gxma1	323	311	31	24	20	14.880	0.705	0.511	0.486	0.599	0.513	0	0	1	0	0	0	a	a.102.5.1	A(327-649)
d1gxua_	88	88	21	14	11	3.234	0.840	0.628	0.573	0.695	0.608	0	0	1	1	0	0	d	d.58.10.1	A
d1gzsb_	165	151	28	23	13	8.372	0.778	0.538	0.445	0.383	0.501	0	0	1	0	0	0	a	a.168.1.1	B
d1h03p1	62	59	21	12	8	2.016	1.050	0.629	0.565	0.493	0.600	0	0	1	1	0	0	g	g.18.1.1	P(5-66)
d1h2sb_	60	56	29	10	5	1.450	1.933	0.605	0.593	0.673	0.605	0	0	1	1	0	0	f	f.17.4.1	B
d1h4xa_	111	110	19	17	14	4.522	0.613	0.606	0.545	0.742	0.584	0	0	1	1	0	0	c	c.13.2.1	A
d1h5wa_	250	193	57	17	13	12.597	1.900	0.604	0.428	0.651	0.525	0	0	1	0	0	0	e	e.27.1.1	A
d1h7ca_	103	98	39	11	10	4.290	1.857	0.580	0.516	0.606	0.556	0	0	1	1	0	0	a	a.7.5.1	A
d1h99a1	115	103	20	17	14	4.760	0.645	0.610	0.520	0.624	0.575	0	0	1	1	0	0	a	a.142.1.1	A(54-168)
d1ha8a_	51	51	14	12	9	1.512	0.667	0.652	0.584	0.700	0.629	0	0	1	1	0	0	g	g.58.1.1	A
d1hc7a3	74	71	16	14	12	2.688	0.615	0.620	0.572	0.636	0.612	0	0	1	1	0	0	d	d.68.5.1	A(404-477)
d1he1a1	134	126	28	14	12	4.704	1.077	0.589	0.540	0.507	0.571	0	0	1	1	0	0	a	a.24.11.1	A(96-229)
d1hf2a1	107	105	20	16	12	3.840	0.714	0.611	0.562	0.523	0.596	0	0	1	1	0	0	b	b.80.3.1	A(100-206)
d1hf2a2	89	86	18	16	12	3.456	0.643	0.576	0.539	0.565	0.567	0	0	1	1	0	0	c	c.102.1.1	A(1-99)
d1hfes_	88	85	36	25	8	7.200	1.091	0.048	0.200	0.000	0.133	1	0	0	0	1	0	a	a.137.4.1	S
d1hi9a_	274	268	29	22	18	11.484	0.725	0.581	0.537	0.631	0.574	0	0	1	1	0	0	c	c.99.1.1	A
d1hp1a1	188	184	26	17	16	7.072	0.788	0.606	0.554	0.676	0.593	0	0	1	1	0	0	d	d.114.1.1	A(363-550)
d1hq1a_	76	72	16	15	12	2.880	0.593	0.617	0.553	0.552	0.588	0	0	1	1	0	0	a	a.36.1.1	A
d1hufa_	123	119	22	17	12	4.488	0.759	0.594	0.559	0.629	0.590	0	0	1	1	0	0	d	d.195.1.1	A
d1hw1a2	152	148	25	18	15	6.750	0.758	0.596	0.523	0.593	0.561	0	0	1	1	0	0	a	a.78.1.1	A(79-230)
d1hxna_	210	208	26	23	17	10.166	0.650	0.594	0.511	0.520	0.566	0	0	1	1	0	0	b	b.66.1.1	A
d1hy9a_	41	38	16	10	7	1.120	0.941	0.676	0.609	0.873	0.661	0	0	1	1	0	0	g	g.3.17.1	A
d1hyka_	46	41	18	12	6	1.296	1.000	0.701	0.525	0.702	0.614	0	0	1	1	0	0	g	g.3.5.1	A
d1hyoa1	118	112	20	17	15	5.100	0.625	0.609	0.511	0.585	0.563	0	0	1	1	0	0	b	b.34.8.1	A(1-118)
d1hyoa2	298	276	30	23	19	13.110	0.714	0.590	0.506	0.648	0.559	0	0	1	1	0	0	d	d.177.1.1	A(119-416)
d1i2ta_	61	58	17	12	10	2.040	0.773	0.610	0.575	0.566	0.601	0	0	1	1	0	0	a	a.144.1.1	A
d1i3ja_	96	94	45	21	12	11.340	1.364	0.126	0.174	0.027	0.150	1	0	0	0	1	0	d	d.285.1.1	A
d1i4ja_	110	95	31	13	9	3.627	1.409	0.570	0.536	0.491	0.561	0	0	1	1	0	0	d	d.55.1.1	A
d1i5pa2	209	185	27	21	16	9.072	0.730	0.593	0.498	0.624	0.557	0	0	1	0	0	0	b	b.77.2.1	A(264-472)
d1i5pa3	263	225	33	21	18	12.474	0.846	0.629	0.499	0.568	0.573	0	0	1	0	0	0	f	f.1.3.1	A(1-263)
d1i8xa_	30	29	14	11	6	0.924	0.824	0.566	0.559	0.138	0.563	0	0	1	1	0	0	g	g.3.16.1	A
d1ib8a1	74	69	17	14	11	2.618	0.680	0.527	0.532	0.274	0.529	0	0	1	1	1	0	b	b.38.2.1	A(91-164)
d1ib8a2	90	82	23	14	12	3.864	0.885	0.534	0.487	0.437	0.520	0	0	1	0	0	0	d	d.52.4.1	A(1-90)
d1ifra1	109	108	22	17	13	4.862	0.733	0.627	0.541	0.564	0.599	0	0	1	1	0	0	b	b.1.16.1	A(436-544)
d1ig3a1	85	83	18	14	12	3.024	0.692	0.606	0.554	0.584	0.588	0	0	1	1	0	0	b	b.82.6.1	A(179-263)
d1ig3a2	158	152	22	20	16	7.040	0.611	0.606	0.517	0.684	0.570	0	0	1	1	0	0	c	c.100.1.1	A(21-178)
d1iiba_	103	100	20	16	13	4.160	0.690	0.595	0.548	0.532	0.587	0	0	1	1	0	0	c	c.44.2.1	A
d1iiea_	75	68	27	15	13	5.265	0.964	0.302	0.289	0.090	0.298	1	0	0	0	0	0	a	a.109.1.1	A
d1iioa1	81	79	19	13	10	2.470	0.826	0.600	0.592	0.273	0.595	0	0	1	1	0	0	a	a.39.4.1	A(1-81)
d1ijqa1	258	256	25	23	18	10.350	0.610	0.576	0.563	0.296	0.576	0	0	1	1	0	0	b	b.68.5.1	A(377-642)
d1ijya_	122	118	23	17	13	5.083	0.767	0.597	0.538	0.732	0.584	0	0	1	1	0	0	a	a.141.1.1	A
d1ikpa3	143	122	25	18	12	5.400	0.833	0.615	0.512	0.509	0.578	0	0	1	1	0	0	f	f.1.5.1	A(252-394)
d1in0a1	88	76	21	14	12	3.528	0.808	0.503	0.471	0.518	0.498	0	0	1	0	0	0	d	d.58.49.1	A(2-89)
d1io0a_	166	156	25	18	12	5.400	0.833	0.594	0.578	0.655	0.595	0	0	1	1	0	0	c	c.10.1.1	A
d1io1a_	395	350	64	29	15	27.840	1.455	0.361	0.300	0.494	0.337	0	1	0	0	0	0	e	e.32.1.1	A
d1iqoa_	88	80	18	18	14	4.536	0.562	0.506	0.407	0.655	0.471	0	0	1	0	0	0	d	d.214.1.1	A
d1iqza_	81	78	16	14	11	2.464	0.640	0.611	0.596	0.499	0.613	0	0	1	1	0	0	d	d.58.1.4	A
d1irqa_	48	45	20	12	11	2.640	0.870	0.448	0.354	0.606	0.408	0	1	0	0	0	0	a	a.43.1.4	A
d1is9a_	358	354	27	24	23	14.904	0.574	0.589	0.561	0.541	0.590	0	0	1	1	0	0	a	a.102.1.2	A
d1itxa2	72	66	17	12	12	2.448	0.708	0.651	0.577	0.774	0.619	0	0	1	1	0	0	d	d.26.3.1	A(338-409)
d1iuqa1	355	329	37	25	18	16.650	0.860	0.573	0.496	0.586	0.546	0	0	1	0	0	0	c	c.112.1.1	A(4-368)
d1ivza1	119	113	25	16	13	5.200	0.862	0.605	0.526	0.590	0.577	0	0	1	1	0	0	d	d.58.41.1	A(8-126)
d1iwga1	97	94	23	14	12	3.864	0.885	0.599	0.527	0.522	0.573	0	0	1	1	0	0	d	d.58.44.1	A(38-134)
d1iwga5	92	76	35	15	9	4.725	1.458	0.481	0.358	0.508	0.423	0	1	0	0	0	0	d	d.225.1.1	A(182-273)
d1iwga7	199	190	32	19	16	9.728	0.914	0.594	0.467	0.608	0.539	0	0	1	0	0	0	f	f.35.1.1	A(7-37,331-498)
d1ix9a1	90	90	28	12	10	3.360	1.273	0.634	0.563	0.719	0.609	0	0	1	1	0	0	a	a.2.11.1	A(1-90)
d1ix9a2	115	112	22	19	12	5.016	0.710	0.622	0.529	0.629	0.589	0	0	1	1	0	0	d	d.44.1.1	A(91-205)
d1ixma_	168	141	24	21	15	7.560	0.667	0.530	0.429	0.558	0.488	0	0	1	0	0	0	d	d.123.1.1	A
d1iyjb1	196	186	31	25	12	9.300	0.838	0.578	0.469	0.695	0.537	0	0	1	0	0	0	a	a.170.1.1	B(2403-2598)
d1iyjb2	30	29	14	11	6	0.924	0.824	0.552	0.499	0.576	0.530	0	0	1	0	0	0	a	a.171.1.1	B(2761-2897)
d1iyra_	83	70	21	17	9	3.213	0.808	0.578	0.468	0.365	0.525	0	0	1	0	0	0	a	a.164.1.1	A
d1izma_	170	153	24	20	15	7.200	0.686	0.630	0.519	0.741	0.587	0	0	1	1	0	0	a	a.199.1.1	A
d1j09a1	163	150	30	17	15	7.650	0.938	0.581	0.494	0.556	0.549	0	0	1	0	0	0	a	a.97.1.1	A(306-468)
d1j0ta_	78	74	20	15	10	3.000	0.800	0.659	0.575	0.665	0.636	0	0	1	1	0	0	a	a.163.1.1	A
d1j1db_	70	59	42	15	5	3.150	2.100	0.297	0.346	0.092	0.325	1	0	0	0	1	1	h	h.1.25.1	B
d1j26a1	99	88	23	13	12	3.588	0.920	0.600	0.513	0.564	0.563	0	0	1	1	0	0	d	d.50.4.1	A(8-106)
d1j27a_	98	93	24	13	11	3.432	1.000	0.598	0.568	0.359	0.586	0	0	1	1	0	0	d	d.58.50.1	A
d1j2jb_	41	40	21	13	5	1.365	1.167	0.634	0.533	0.414	0.582	0	0	1	1	0	0	a	a.7.8.1	B
d1j2ma_	99	86	20	15	12	3.600	0.741	0.586	0.532	0.356	0.563	0	0	1	1	0	0	a	a.165.1.1	A
d1j3aa_	129	112	22	18	13	5.148	0.710	0.612	0.523	0.508	0.568	0	0	1	1	0	0	c	c.21.1.1	A
d1j3ma_	127	113	28	15	12	5.040	1.037	0.539	0.504	0.593	0.534	0	0	1	1	0	0	d	d.129.7.1	A
d1j3wa_	134	123	22	18	14	5.544	0.688	0.582	0.515	0.714	0.567	0	0	1	1	0	0	d	d.110.7.1	A
d1j5ua1	124	111	20	19	11	4.180	0.667	0.612	0.595	0.621	0.613	0	0	1	1	0	0	d	d.208.1.1	A(7-130)
d1j6qa_	100	93	19	15	12	3.420	0.704	0.604	0.537	0.561	0.571	0	0	1	1	0	0	b	b.40.9.1	A
d1j8ua_	307	294	30	25	20	15.000	0.667	0.571	0.512	0.625	0.556	0	0	1	1	0	0	d	d.178.1.1	A
d1j98a_	154	139	23	19	16	6.992	0.657	0.626	0.506	0.479	0.572	0	0	1	1	0	0	d	d.185.1.2	A
d1jada_	242	216	80	13	11	11.440	3.333	0.554	0.474	0.484	0.525	0	0	1	0	0	1	h	h.4.10.1	A
d1jb0k_	46	41	26	8	6	1.248	1.857	0.523	0.409	0.526	0.474	0	0	1	0	0	0	f	f.30.1.1	K
d1jb3a_	127	123	23	16	16	5.888	0.719	0.627	0.512	0.610	0.579	0	0	1	1	0	0	b	b.40.3.2	A
d1jbia_	100	98	19	15	11	3.135	0.731	0.632	0.594	0.636	0.624	0	0	1	1	0	0	d	d.209.1.1	A
d1jcha3	139	133	63	9	9	5.103	3.500	0.604	0.538	0.613	0.582	0	0	1	1	0	1	h	h.4.9.1	A(316-454)
d1jcla1	251	245	28	23	17	10.948	0.700	0.614	0.541	0.649	0.593	0	0	1	1	0	0	c	c.1.10.1	A(1-251)
d1jfba_	399	387	32	29	21	19.488	0.640	0.488	0.471	0.330	0.489	0	1	0	0	0	0	a	a.104.1.1	A
d1jfla1	115	103	26	15	13	5.070	0.929	0.577	0.494	0.682	0.554	0	0	1	0	0	0	c	c.78.2.1	A(1-115)
d1jg1a_	215	210	25	19	18	8.550	0.676	0.584	0.546	0.399	0.571	0	0	1	1	0	0	c	c.66.1.7	A
d1jida_	114	107	24	17	12	4.896	0.828	0.589	0.513	0.631	0.559	0	0	1	1	0	0	d	d.201.1.1	A
d1jjcb4	104	97	26	13	12	4.056	1.040	0.595	0.533	0.427	0.563	0	0	1	1	0	0	d	d.58.13.1	B(682-785)
d1jjcb6	209	200	25	20	18	9.000	0.658	0.572	0.529	0.535	0.562	0	0	1	1	0	0	b	b.153.1.1	B(191-399)
d1jkea_	145	129	23	17	14	5.474	0.742	0.613	0.529	0.636	0.582	0	0	1	1	0	0	c	c.110.1.1	A
d1jlya1	153	149	21	19	16	6.384	0.600	0.605	0.562	0.352	0.591	0	0	1	1	0	0	b	b.42.3.1	A(1-153)
d1jm1a_	202	200	23	22	17	8.602	0.590	0.617	0.539	0.684	0.593	0	0	1	1	0	0	b	b.33.1.1	A
d1joca2	59	53	54	6	5	1.620	4.909	0.694	0.593	0.692	0.652	0	0	1	1	0	1	h	h.1.21.1	A(1289-1347)
d1jofa_	365	348	27	25	23	15.525	0.562	0.550	0.529	0.552	0.548	0	0	1	1	0	0	b	b.69.10.1	A
d1josa_	100	94	24	14	11	3.696	0.960	0.584	0.549	0.541	0.577	0	0	1	1	0	0	d	d.52.7.1	A
d1jr8a_	105	98	21	16	13	4.368	0.724	0.594	0.520	0.657	0.565	0	0	1	1	0	0	a	a.24.15.1	A
d1js8a2	101	96	27	17	10	4.590	1.000	0.577	0.495	0.549	0.551	0	0	1	0	0	0	b	b.112.1.1	A(2792-2892)
d1jv2b3	85	82	20	19	11	4.180	0.667	0.615	0.497	0.482	0.568	0	0	1	0	0	0	d	d.200.1.1	B(606-690)
d1jw9b_	240	226	29	23	18	12.006	0.707	0.592	0.458	0.638	0.537	0	0	1	0	0	0	c	c.111.1.1	B
d1jx4a1	101	97	23	14	13	4.186	0.852	0.620	0.571	0.439	0.608	0	0	1	1	0	0	d	d.240.1.1	A(241-341)
d1k04a_	142	120	38	24	10	9.120	1.118	0.263	0.286	0.059	0.276	1	0	0	0	1	0	a	a.24.14.1	A
d1k0ra4	99	87	26	16	12	4.992	0.929	0.415	0.388	0.515	0.409	0	1	0	0	0	0	d	d.202.1.1	A(1-99)
d1k18a_	31	30	13	10	7	0.910	0.765	0.734	0.629	0.730	0.691	0	0	1	1	0	0	g	g.67.1.1	A
d1k1fa_	67	60	33	15	6	2.970	1.571	0.202	0.313	0.011	0.252	1	0	0	0	1	0	a	a.147.1.1	A
d1k20a_	310	304	31	24	19	14.136	0.721	0.559	0.508	0.454	0.540	0	0	1	1	0	0	c	c.107.1.1	A
d1k24a_	249	243	43	18	15	11.610	1.303	0.471	0.475	0.131	0.476	0	1	0	0	1	0	f	f.4.4.2	A
d1k2aa_	136	127	24	17	14	5.712	0.774	0.586	0.521	0.675	0.567	0	0	1	1	0	0	d	d.5.1.1	A
d1k2yx1	150	150	20	19	15	5.700	0.588	0.610	0.556	0.531	0.595	0	0	1	1	0	0	c	c.84.1.1	X(5-154)
d1k2yx4	96	90	20	14	12	3.360	0.769	0.629	0.573	0.640	0.604	0	0	1	1	0	0	d	d.129.2.1	X(368-463)
d1k32a2	281	268	26	25	20	13.000	0.578	0.557	0.511	0.329	0.541	0	0	1	1	0	0	b	b.68.7.1	A(39-319)
d1k32a3	360	318	32	25	21	16.800	0.696	0.484	0.464	0.120	0.476	0	1	0	0	0	0	b	b.69.9.1	A(320-679)
d1k3xa1	89	85	17	15	12	3.060	0.630	0.590	0.581	0.614	0.599	0	0	1	1	0	0	a	a.156.1.2	A(125-213)
d1k3xa2	124	121	21	17	14	4.998	0.677	0.603	0.549	0.427	0.586	0	0	1	1	0	0	b	b.113.1.1	A(1-124)
d1k3xa3	40	35	16	10	8	1.280	0.889	0.594	0.552	0.569	0.589	0	0	1	1	0	0	g	g.39.1.8	A(223-262)
d1k4ia_	216	191	26	20	16	8.320	0.722	0.638	0.542	0.717	0.598	0	0	1	1	0	0	d	d.115.1.2	A
d1k4ta1	72	69	35	11	7	2.695	1.944	0.655	0.560	0.455	0.616	0	0	1	1	0	0	a	a.2.8.1	A(641-712)
d1k4za_	157	130	23	18	13	5.382	0.742	0.596	0.547	0.563	0.586	0	0	1	1	0	0	b	b.80.5.1	A
d1k5ca_	333	324	34	23	18	14.076	0.829	0.576	0.505	0.665	0.551	0	0	1	1	0	0	b	b.80.1.3	A
d1k5na2	181	172	28	22	13	8.008	0.800	0.554	0.506	0.656	0.544	0	0	1	1	0	0	d	d.19.1.1	A(1-181)
d1k6ka_	142	133	23	19	13	5.681	0.719	0.571	0.509	0.622	0.545	0	0	1	1	0	0	a	a.174.1.1	A
d1k8kd1	120	114	24	15	14	5.040	0.828	0.610	0.529	0.475	0.578	0	0	1	1	0	0	d	d.198.2.1	D(1-120)
d1k8ke_	174	168	28	19	16	8.512	0.800	0.601	0.505	0.621	0.569	0	0	1	1	0	0	a	a.148.1.1	E
d1k8kg_	139	117	24	17	13	5.304	0.800	0.581	0.489	0.520	0.548	0	0	1	0	0	0	a	a.118.13.1	G
d1k8ta_	498	438	50	29	22	31.900	0.980	0.387	0.361	0.238	0.383	0	1	0	0	0	0	e	e.41.1.1	A
d1k91a1	36	36	26	10	6	1.560	1.625	0.652	0.498	0.762	0.589	0	0	1	0	0	0	b	b.104.1.1	A(221-256)
d1k92a2	256	234	37	29	22	23.606	0.725	0.212	0.223	0.095	0.221	1	0	0	0	1	0	d	d.210.1.1	A(189-444)
d1ka1a_	354	349	33	23	21	15.939	0.750	0.591	0.528	0.637	0.572	0	0	1	1	0	0	e	e.7.1.1	A
d1kafa_	108	106	19	16	15	4.560	0.613	0.606	0.543	0.668	0.589	0	0	1	1	0	0	d	d.199.1.1	A
d1kb0a2	573	560	38	27	25	25.650	0.731	0.595	0.539	0.580	0.577	0	0	1	1	0	0	b	b.70.1.1	A(1-573)
d1kbla2	133	122	18	17	15	4.590	0.562	0.618	0.567	0.560	0.607	0	0	1	1	0	0	c	c.8.1.1	A(377-509)
d1kful2	159	147	24	19	14	6.384	0.727	0.629	0.550	0.646	0.602	0	0	1	1	0	0	b	b.14.1.1	L(356-514)
d1kg1a_	60	50	21	12	9	2.268	1.000	0.492	0.415	0.829	0.466	0	1	0	0	0	0	g	g.70.1.1	A
d1kjna_	152	149	24	18	16	6.912	0.706	0.602	0.519	0.567	0.572	0	0	1	1	0	0	c	c.115.1.1	A
d1kjqa1	74	74	23	13	10	2.990	1.000	0.636	0.528	0.638	0.586	0	0	1	1	0	0	b	b.84.2.1	A(319-392)
d1kjqa2	111	104	20	16	13	4.160	0.690	0.610	0.545	0.699	0.598	0	0	1	1	0	0	c	c.30.1.1	A(2-112)
d1kjqa3	203	202	30	19	18	10.260	0.811	0.498	0.461	0.564	0.492	0	1	0	0	0	0	d	d.142.1.2	A(113-318)
d1kl9a1	94	82	21	15	13	4.095	0.750	0.618	0.512	0.619	0.575	0	0	1	1	0	0	a	a.60.14.1	A(89-182)
d1kmiz_	177	126	73	10	9	6.570	3.842	0.484	0.429	0.382	0.464	0	1	0	0	0	1	h	h.4.11.1	Z
d1knla_	126	123	17	17	14	4.046	0.548	0.601	0.597	0.496	0.607	0	0	1	1	0	0	b	b.42.2.1	A
d1knza_	154	141	33	30	15	14.850	0.733	0.266	0.219	0.511	0.256	1	0	0	0	0	0	e	e.34.1.1	A
d1kp6a_	79	76	19	12	11	2.508	0.826	0.682	0.595	0.597	0.648	0	0	1	1	0	0	d	d.58.25.1	A
d1kpta_	105	103	20	15	13	3.900	0.714	0.640	0.543	0.654	0.592	0	0	1	1	0	0	d	d.70.1.1	A
d1kq6a_	140	134	27	21	13	7.371	0.794	0.596	0.482	0.430	0.551	0	0	1	0	0	0	d	d.189.1.1	A
d1kqfb2	45	38	37	7	4	1.036	3.364	0.553	0.484	0.647	0.528	0	0	1	0	0	1	f	f.23.22.1	B(246-290)
d1kqfc_	216	192	40	18	17	12.240	1.143	0.498	0.428	0.267	0.466	0	1	0	0	0	0	f	f.21.1.1	C
d1kqpa_	271	247	27	26	19	13.338	0.600	0.529	0.469	0.535	0.509	0	0	1	0	0	0	c	c.26.2.1	A
d1kx9a_	108	106	21	16	14	4.704	0.700	0.583	0.529	0.493	0.565	0	0	1	1	0	0	a	a.118.21.1	A
d1kzqa1	129	127	22	16	14	4.928	0.733	0.609	0.553	0.480	0.589	0	0	1	1	0	0	b	b.6.2.1	A(3-131)
d1l0qa1	90	89	27	13	10	3.510	1.174	0.611	0.545	0.513	0.589	0	0	1	1	0	0	b	b.1.3.1	A(302-391)
d1l0sa_	88	87	18	14	12	3.024	0.692	0.613	0.567	0.618	0.595	0	0	1	1	0	0	b	b.81.2.1	A
d1l0wa2	120	118	20	18	13	4.680	0.645	0.593	0.546	0.724	0.580	0	0	1	1	0	0	d	d.74.4.1	A(295-414)
d1l1la_	717	680	43	35	28	42.140	0.683	0.485	0.418	0.352	0.463	0	1	0	0	0	0	c	c.7.1.4	A
d1l2pa_	61	57	58	5	4	1.160	6.444	0.821	0.718	0.918	0.785	0	0	1	1	0	1	f	f.23.21.1	A
d1l3ka1	84	76	20	14	10	2.800	0.833	0.625	0.598	0.500	0.621	0	0	1	1	0	0	d	d.58.7.1	A(8-91)
d1l3la2	168	165	23	20	16	7.360	0.639	0.581	0.526	0.613	0.566	0	0	1	1	0	0	d	d.110.5.1	A(2-169)
d1l5ja1	160	138	31	15	13	6.045	1.107	0.589	0.521	0.574	0.566	0	0	1	1	0	0	a	a.118.15.1	A(1-160)
d1l6pa_	121	119	31	15	12	5.580	1.148	0.611	0.524	0.581	0.581	0	0	1	1	0	0	b	b.1.17.1	A
d1l8da_	103	90	43	9	9	3.483	2.389	0.595	0.539	0.612	0.572	0	0	1	1	0	1	h	h.4.12.1	A
d1l8wa_	271	254	38	19	16	11.552	1.086	0.605	0.503	0.460	0.563	0	0	1	1	0	0	a	a.154.1.1	A
d1l9la_	74	72	18	16	10	2.880	0.692	0.629	0.561	0.620	0.600	0	0	1	1	0	0	a	a.64.1.1	A
d1l9na2	114	109	29	14	10	4.060	1.208	0.592	0.559	0.418	0.582	0	0	1	1	0	0	b	b.1.5.1	A(480-593)
d1lc0a2	118	111	27	16	12	5.184	0.964	0.593	0.503	0.511	0.552	0	0	1	1	0	0	d	d.81.1.4	A(129-246)
d1ldja3	276	257	35	28	18	17.640	0.761	0.398	0.364	0.226	0.389	0	1	0	0	0	0	e	e.40.1.1	A(411-686)
d1lfpa_	243	240	30	25	17	12.750	0.714	0.487	0.450	0.313	0.472	0	1	0	0	0	0	e	e.39.1.1	A
d1lg7a_	164	155	27	18	14	6.804	0.844	0.621	0.553	0.781	0.601	0	0	1	1	0	0	d	d.213.1.1	A
d1lkka_	105	98	23	15	13	4.485	0.821	0.615	0.535	0.643	0.587	0	0	1	1	0	0	d	d.93.1.1	A
d1lkta_	104	91	20	16	13	4.160	0.690	0.568	0.501	0.524	0.551	0	0	1	1	0	0	b	b.90.1.1	A
d1llaa1	99	97	21	15	14	4.410	0.724	0.623	0.533	0.552	0.588	0	0	1	1	0	0	a	a.85.1.1	A(2-109)
d1lm5a_	189	184	27	20	15	8.100	0.771	0.628	0.546	0.729	0.604	0	0	1	1	0	0	d	d.211.2.1	A
d1lmia1	130	125	24	18	11	4.752	0.828	0.607	0.555	0.674	0.595	0	0	1	1	0	0	b	b.1.19.1	A(2-131)
d1ln4a1	97	93	22	15	11	3.630	0.846	0.607	0.555	0.678	0.585	0	0	1	1	0	0	d	d.68.4.1	A(1-97)
d1lnsa1	145	144	21	20	16	6.720	0.583	0.598	0.531	0.543	0.576	0	0	1	1	0	0	a	a.40.2.1	A(1-145)
d1lpba1	39	37	14	13	7	1.274	0.700	0.633	0.522	0.789	0.594	0	0	1	1	0	0	g	g.3.10.1	A(6-44)
d1lpva_	52	43	16	13	10	2.080	0.696	0.503	0.451	0.324	0.486	0	0	1	0	0	0	g	g.62.1.1	A
d1lqbc_	150	136	32	17	12	6.528	1.103	0.577	0.503	0.742	0.555	0	0	1	1	0	0	b	b.3.3.1	C
d1lqua2	238	227	31	21	18	11.718	0.795	0.576	0.478	0.683	0.538	0	0	1	0	0	0	c	c.4.1.1	A(2-108,325-456)
d1lrza1	65	61	31	11	7	2.387	1.722	0.652	0.585	0.547	0.629	0	0	1	1	0	0	a	a.2.7.4	A(245-309)
d1ls1a1	88	83	20	13	11	2.860	0.833	0.552	0.548	0.329	0.555	0	0	1	1	0	0	a	a.24.13.1	A(1-88)
d1lsha1	336	306	47	24	17	19.176	1.146	0.434	0.394	0.337	0.424	0	1	0	0	0	0	a	a.118.4.1	A(285-620)
d1lsha2	268	245	31	24	18	13.392	0.738	0.523	0.436	0.491	0.484	0	0	1	0	0	0	f	f.7.1.1	A(17-284)
d1lsla1	54	51	28	9	5	1.260	2.000	0.722	0.627	0.663	0.681	0	0	1	1	0	1	g	g.60.1.1	A(416-469)
d1lu0a_	29	27	11	9	6	0.594	0.733	0.619	0.579	0.718	0.608	0	0	1	1	0	0	g	g.3.2.1	A
d1luca_	326	321	31	23	22	15.686	0.689	0.542	0.490	0.552	0.527	0	0	1	0	0	0	c	c.1.16.1	A
d1m1ca_	651	620	57	28	22	35.112	1.140	0.589	0.477	0.580	0.544	0	0	1	0	0	0	e	e.42.1.1	A
d1m1eb_	65	47	41	12	6	2.952	2.278	0.504	0.350	0.760	0.436	0	0	1	0	0	1	a	a.161.1.1	B
d1m1ha1	81	80	19	14	11	2.926	0.760	0.609	0.577	0.499	0.601	0	0	1	1	0	0	b	b.114.1.1	A(51-131)
d1m1ha2	101	90	20	15	12	3.600	0.741	0.565	0.552	0.621	0.580	0	0	1	1	0	0	d	d.58.42.1	A(5-50,132-186)
d1m40a_	263	253	27	22	18	10.692	0.675	0.598	0.549	0.648	0.590	0	0	1	1	0	0	e	e.3.1.1	A
d1m55a_	193	178	27	22	14	8.316	0.750	0.631	0.540	0.540	0.594	0	0	1	1	0	0	d	d.89.1.3	A
d1m56d_	42	35	38	6	4	0.912	3.800	0.828	0.665	0.946	0.762	0	0	1	1	0	1	f	f.23.8.1	D
d1m5ia_	105	93	46	10	9	4.140	2.421	0.611	0.518	0.563	0.571	0	0	1	1	0	1	h	h.4.13.1	A
d1m5wa_	242	229	25	23	16	9.200	0.641	0.569	0.550	0.447	0.571	0	0	1	1	0	0	c	c.1.24.1	A
d1m65a_	234	234	25	22	18	9.900	0.625	0.614	0.548	0.563	0.592	0	0	1	1	0	0	c	c.6.3.1	A
d1mf7a1	192	188	22	19	18	7.524	0.595	0.606	0.571	0.695	0.601	0	0	1	1	0	0	c	c.62.1.1	A(128-319)
d1mg4a_	101	99	20	17	14	4.760	0.645	0.634	0.502	0.710	0.575	0	0	1	1	0	0	d	d.15.11.1	A
d1miwa1	265	244	47	19	14	12.502	1.424	0.536	0.459	0.580	0.512	0	0	1	0	0	0	a	a.173.1.1	A(140-404)
d1mk0a_	97	97	20	16	12	3.840	0.714	0.573	0.559	0.637	0.581	0	0	1	1	0	0	d	d.226.1.1	A
d1mkca_	43	41	15	11	8	1.320	0.789	0.684	0.579	0.846	0.641	0	0	1	1	0	0	g	g.5.1.2	A
d1mkfa_	371	343	40	22	21	18.480	0.930	0.575	0.463	0.646	0.533	0	0	1	0	0	0	b	b.116.1.1	A
d1mkya3	81	80	19	14	12	3.192	0.731	0.591	0.556	0.469	0.583	0	0	1	1	0	0	d	d.52.5.1	A(359-439)
d1mlaa1	235	228	24	22	18	9.504	0.600	0.599	0.537	0.578	0.580	0	0	1	1	0	0	c	c.19.1.1	A(3-127,198-307)
d1mlaa2	70	70	17	14	10	2.380	0.708	0.606	0.554	0.622	0.590	0	0	1	1	0	0	d	d.58.23.1	A(128-197)
d1mp1a1	108	101	20	17	12	4.080	0.690	0.695	0.588	0.595	0.649	0	0	1	1	0	0	a	a.188.1.1	A(27-134)
d1mpga2	99	90	25	16	12	4.800	0.893	0.587	0.469	0.671	0.541	0	0	1	0	0	0	d	d.129.1.2	A(1-99)
d1muna_	225	217	31	18	17	9.486	0.886	0.520	0.504	0.341	0.520	0	0	1	1	0	0	a	a.96.1.2	A
d1mv8a3	136	136	24	17	14	5.712	0.774	0.592	0.532	0.705	0.576	0	0	1	1	0	0	c	c.26.3.1	A(301-436)
d1mvfd_	44	40	15	13	11	2.145	0.625	0.302	0.312	0.495	0.307	0	1	0	0	1	0	b	b.129.1.1	D
d1mw5a1	154	142	33	15	14	6.930	1.138	0.586	0.492	0.580	0.545	0	0	1	0	0	0	d	d.259.1.1	A(3-156)
d1mw9x_	556	535	53	37	18	35.298	0.964	0.384	0.367	0.573	0.387	0	1	0	0	0	0	e	e.10.1.1	X
d1mwqa_	100	93	23	14	12	3.864	0.885	0.569	0.513	0.287	0.543	0	0	1	1	0	0	d	d.58.4.7	A
d1n2xa1	101	98	21	15	13	4.095	0.750	0.609	0.565	0.478	0.599	0	0	1	1	0	0	a	a.60.13.1	A(115-215)
d1n3la_	332	307	36	25	20	18.000	0.800	0.536	0.448	0.618	0.502	0	0	1	0	0	0	c	c.26.1.1	A
d1n4ka1	150	135	29	19	14	7.714	0.879	0.595	0.444	0.532	0.521	0	0	1	0	0	0	a	a.118.22.1	A(436-602)
d1n4wa1	367	345	35	26	21	19.110	0.745	0.512	0.449	0.409	0.489	0	0	1	0	0	0	c	c.3.1.2	A(9-318,451-507)
d1n4wa2	132	111	25	18	13	5.850	0.806	0.574	0.456	0.584	0.526	0	0	1	0	0	0	d	d.16.1.1	A(319-450)
d1n55a_	249	239	25	22	19	10.450	0.610	0.589	0.534	0.547	0.576	0	0	1	1	0	0	c	c.1.1.1	A
d1n62a1	82	76	18	13	11	2.574	0.750	0.617	0.571	0.600	0.602	0	0	1	1	0	0	a	a.56.1.1	A(82-163)
d1n62b1	141	123	45	20	13	11.700	1.364	0.250	0.233	0.097	0.242	1	0	0	0	0	0	d	d.41.1.1	B(6-146)
d1n62b2	663	576	45	32	23	33.120	0.818	0.603	0.461	0.630	0.544	0	0	1	0	0	0	d	d.133.1.1	B(147-809)
d1n62c1	109	101	22	13	11	3.146	0.917	0.618	0.594	0.415	0.615	0	0	1	1	0	0	d	d.87.2.1	C(178-286)
d1n62c2	177	174	26	19	15	7.410	0.765	0.552	0.501	0.559	0.528	0	0	1	1	0	0	d	d.145.1.3	C(1-177)
d1n6za_	105	101	32	15	11	5.280	1.231	0.578	0.473	0.515	0.536	0	0	1	0	0	0	d	d.263.1.1	A
d1n7va_	533	469	86	21	16	28.896	2.324	0.580	0.417	0.665	0.510	0	0	1	0	0	1	b	b.126.1.1	A
d1n7za_	328	284	43	23	20	19.780	1.000	0.532	0.398	0.661	0.477	0	0	1	0	0	0	b	b.127.1.1	A
d1n81a_	186	167	30	19	14	7.980	0.909	0.628	0.539	0.563	0.591	0	0	1	1	0	0	a	a.185.1.1	A
d1n91a1	100	96	20	15	14	4.200	0.690	0.529	0.492	0.475	0.520	0	0	1	0	0	0	d	d.206.1.1	A(1-100)
d1n93x_	335	281	44	24	17	17.952	1.073	0.454	0.387	0.627	0.432	0	1	0	0	0	0	a	a.206.1.1	X
d1na6a1	172	160	26	20	15	7.800	0.743	0.606	0.507	0.599	0.568	0	0	1	1	0	0	b	b.142.1.1	A(4-178)
d1nc7a1	114	104	24	14	12	4.032	0.923	0.599	0.547	0.694	0.586	0	0	1	1	0	0	b	b.123.1.1	A(1-114)
d1neia_	60	52	23	12	8	2.208	1.150	0.616	0.497	0.752	0.571	0	0	1	0	0	0	d	d.253.1.1	A
d1ng6a_	148	127	32	18	12	6.912	1.067	0.554	0.464	0.435	0.516	0	0	1	0	0	0	a	a.182.1.1	A
d1ng7a1	59	56	19	13	12	2.964	0.760	0.352	0.357	0.409	0.361	0	1	0	0	1	0	a	a.178.1.1	A(2-60)
d1nh1a_	290	279	34	22	19	14.212	0.829	0.543	0.468	0.454	0.511	0	0	1	0	0	0	e	e.45.1.1	A
d1nh2b_	46	44	22	12	6	1.584	1.222	0.604	0.553	0.542	0.591	0	0	1	1	0	0	a	a.32.1.1	B
d1nh2c_	50	45	20	15	7	2.100	0.909	0.406	0.418	0.340	0.419	0	1	0	0	1	0	b	b.56.1.1	C
d1njha1	106	101	21	16	13	4.368	0.724	0.576	0.512	0.625	0.554	0	0	1	1	0	0	b	b.128.1.1	A(1-116)
d1nkda_	59	57	27	10	7	1.890	1.588	0.657	0.597	0.591	0.632	0	0	1	1	0	0	a	a.30.1.1	A
d1nkia_	134	119	26	16	16	6.656	0.812	0.517	0.432	0.575	0.489	0	0	1	0	0	0	d	d.32.1.2	A
d1nkna_	74	63	61	8	5	2.440	4.692	0.564	0.495	0.511	0.536	0	0	1	0	0	1	h	h.1.26.1	A
d1nkza_	53	39	35	8	6	1.680	2.500	0.595	0.476	0.814	0.556	0	0	1	0	0	1	f	f.3.1.1	A
d1nlqa_	105	103	26	14	12	4.368	1.000	0.616	0.553	0.542	0.594	0	0	1	1	0	0	b	b.121.3.1	A
d1nlsa_	237	227	28	21	18	10.584	0.718	0.607	0.529	0.684	0.580	0	0	1	1	0	0	b	b.29.1.1	A
d1nlta3	74	62	30	12	8	2.880	1.500	0.584	0.452	0.697	0.529	0	0	1	0	0	0	g	g.54.1.1	A(139-212)
d1nnva_	107	95	25	15	12	4.500	0.926	0.626	0.501	0.737	0.573	0	0	1	1	0	0	d	d.17.7.1	A
d1nnxa_	93	86	18	15	14	3.780	0.621	0.628	0.527	0.552	0.584	0	0	1	1	0	0	b	b.40.10.1	A
d1no1a1	66	66	16	15	9	2.160	0.667	0.545	0.549	0.344	0.553	0	0	1	1	1	0	a	a.179.1.1	A(2-67)
d1no4a_	77	65	48	9	6	2.592	3.200	0.369	0.428	0.324	0.403	0	1	0	0	1	1	h	h.1.24.1	A
d1no7a_	542	513	38	29	24	26.448	0.717	0.582	0.494	0.519	0.554	0	0	1	0	0	0	e	e.48.1.1	A
d1nqua_	154	144	25	17	13	5.525	0.833	0.594	0.533	0.660	0.572	0	0	1	1	0	0	c	c.16.1.1	A
d1nr3a_	122	118	24	17	13	5.304	0.800	0.494	0.486	0.573	0.500	0	1	0	0	0	0	d	d.236.1.1	A
d1nrja_	147	137	27	17	16	7.344	0.818	0.586	0.480	0.661	0.544	0	0	1	0	0	0	d	d.110.4.4	A
d1ntha_	457	442	32	29	21	19.488	0.640	0.596	0.541	0.638	0.583	0	0	1	1	0	0	c	c.1.25.1	A
d1ntya1	184	172	32	19	14	8.512	0.970	0.603	0.521	0.662	0.575	0	0	1	1	0	0	a	a.87.1.1	A(1231-1414)
d1nu9c1	145	129	39	16	12	7.488	1.393	0.556	0.446	0.577	0.506	0	0	1	0	0	0	a	a.8.6.1	C(1-145)
d1nwza_	125	125	20	18	14	5.040	0.625	0.618	0.546	0.551	0.588	0	0	1	1	0	0	d	d.110.3.1	A
d1nxha_	124	114	37	13	12	5.772	1.480	0.456	0.459	0.183	0.465	0	1	0	0	1	0	a	a.200.1.1	A
d1nxia1	124	109	25	18	14	6.300	0.781	0.550	0.451	0.591	0.517	0	0	1	0	0	0	d	d.58.47.1	A(1-124)
d1nxja_	156	154	25	16	15	6.000	0.806	0.603	0.547	0.639	0.585	0	0	1	1	0	0	c	c.8.7.1	A
d1ny9a_	94	87	17	17	13	3.757	0.567	0.497	0.470	0.368	0.499	0	1	0	0	0	0	a	a.181.1.1	A
d1nyca1	109	100	21	16	15	5.040	0.677	0.591	0.496	0.457	0.549	0	0	1	0	0	0	b	b.61.2.2	A(1-109)
d1nyha_	76	69	67	6	5	2.010	6.091	0.748	0.605	0.860	0.692	0	0	1	1	0	1	h	h.1.23.1	A
d1nzea_	112	104	24	13	11	3.432	1.000	0.568	0.597	0.494	0.591	0	0	1	1	1	0	a	a.24.18.1	A
d1nzia1	114	103	24	13	12	3.744	0.960	0.631	0.593	0.487	0.614	0	0	1	1	0	0	b	b.23.1.1	A(1-117)
d1o22a_	149	125	32	19	14	8.512	0.970	0.497	0.384	0.695	0.456	0	1	0	0	0	0	d	d.238.1.1	A
d1o5ha_	200	171	34	18	12	7.344	1.133	0.622	0.541	0.666	0.595	0	0	1	1	0	0	a	a.191.1.1	A
d1o6aa_	87	72	31	15	11	5.115	1.192	0.455	0.320	0.676	0.395	0	1	0	0	0	0	b	b.139.1.1	A
d1o70a1	140	136	24	17	15	6.120	0.750	0.613	0.532	0.667	0.583	0	0	1	1	0	0	b	b.118.1.1	A(328-467)
d1o75a1	126	121	25	16	14	5.600	0.833	0.598	0.524	0.394	0.567	0	0	1	1	0	0	b	b.1.20.1	A(207-332)
d1o75a3	191	167	37	19	15	10.545	1.088	0.557	0.415	0.642	0.495	0	0	1	0	0	0	b	b.120.1.1	A(7-206)
d1o7ja_	325	310	36	21	19	14.364	0.900	0.576	0.506	0.665	0.553	0	0	1	1	0	0	c	c.88.1.1	A
d1o8ba1	96	87	21	14	12	3.528	0.808	0.605	0.519	0.583	0.580	0	0	1	1	0	0	c	c.124.1.4	A(23-126,199-218)
d1o8ba2	72	70	18	12	12	2.592	0.750	0.605	0.548	0.603	0.588	0	0	1	1	0	0	d	d.58.40.1	A(127-198)
d1o8ra_	94	94	20	16	13	4.160	0.690	0.584	0.491	0.625	0.549	0	0	1	0	0	0	d	d.234.1.1	A
d1o98a1	234	226	24	21	19	9.576	0.600	0.605	0.561	0.715	0.600	0	0	1	1	0	0	c	c.105.1.1	A(77-310)
d1oaca4	86	79	19	14	13	3.458	0.704	0.577	0.524	0.556	0.558	0	0	1	1	0	0	d	d.82.1.1	A(5-90)
d1oaia_	59	56	17	12	8	1.632	0.850	0.620	0.601	0.586	0.620	0	0	1	1	0	0	a	a.5.2.3	A
d1oc0b_	37	37	12	11	9	1.188	0.600	0.643	0.559	0.836	0.617	0	0	1	1	0	0	g	g.64.1.1	B
d1ocya_	198	170	50	19	16	15.200	1.429	0.284	0.257	0.190	0.279	1	0	0	0	0	0	d	d.231.1.1	A
d1odha_	158	142	30	17	14	7.140	0.968	0.592	0.492	0.547	0.553	0	0	1	0	0	0	d	d.239.1.1	A
d1oeda_	127	120	31	15	11	5.115	1.192	0.442	0.468	0.512	0.465	0	1	0	0	1	0	f	f.36.1.1	A
d1ofcx3	87	84	22	16	11	3.872	0.815	0.523	0.483	0.633	0.522	0	0	1	0	0	0	a	a.187.1.1	X(697-798)
d1ofda1	268	253	32	20	18	11.520	0.842	0.609	0.507	0.633	0.568	0	0	1	1	0	0	b	b.80.4.1	A(1240-1507)
d1ogmx1	199	185	33	23	15	11.385	0.868	0.521	0.409	0.652	0.478	0	0	1	0	0	0	b	b.133.1.1	X(3-201)
d1oh0a_	125	125	24	17	14	5.712	0.774	0.529	0.488	0.300	0.510	0	0	1	0	0	0	d	d.17.4.3	A
d1oi7a2	149	148	20	17	16	5.440	0.606	0.603	0.549	0.622	0.585	0	0	1	1	0	0	c	c.23.4.1	A(122-288)
d1oiga_	24	23	11	7	6	0.462	0.846	0.740	0.680	0.354	0.706	0	0	1	1	0	0	g	g.3.18.1	A
d1oisa_	221	194	39	17	16	10.608	1.182	0.497	0.443	0.584	0.480	0	1	0	0	0	0	e	e.15.1.1	A
d1ojha_	52	48	28	16	5	2.240	1.333	0.311	0.373	0.059	0.343	0	1	0	0	1	0	a	a.214.1.1	A
d1ok0a_	74	74	19	14	10	2.660	0.792	0.618	0.572	0.573	0.603	0	0	1	1	0	0	b	b.5.1.1	A
d1okca_	292	262	32	23	20	14.720	0.744	0.484	0.431	0.261	0.462	0	1	0	0	0	0	f	f.42.1.1	A
d1oksa1	49	48	16	12	9	1.728	0.762	0.593	0.564	0.456	0.588	0	0	1	1	0	0	a	a.8.5.1	A(2-50)
d1olza2	474	434	35	30	23	24.150	0.660	0.539	0.467	0.556	0.511	0	0	1	0	0	0	b	b.69.12.1	A(3-480)
d1olza3	56	53	15	11	10	1.650	0.714	0.674	0.573	0.470	0.624	0	0	1	1	0	0	g	g.16.2.1	A(481-536)
d1om2a_	95	86	33	14	13	6.006	1.222	0.531	0.355	0.602	0.449	0	0	1	0	0	0	a	a.23.4.1	A
d1on2a2	74	66	24	14	9	3.024	1.043	0.615	0.498	0.602	0.568	0	0	1	0	0	0	a	a.76.1.1	A(63-136)
d1oo0a_	144	138	25	22	12	6.600	0.735	0.568	0.505	0.573	0.544	0	0	1	1	0	0	d	d.232.1.1	A
d1oqja_	90	87	19	15	13	3.705	0.679	0.627	0.551	0.437	0.597	0	0	1	1	0	0	d	d.217.1.1	A
d1or7a2	111	97	33	14	11	5.082	1.320	0.592	0.459	0.497	0.535	0	0	1	0	0	0	a	a.177.1.1	A(1-111)
d1or7c_	66	60	22	14	10	3.080	0.917	0.393	0.403	0.383	0.411	0	1	0	0	1	0	a	a.180.1.1	C
d1orda3	161	152	37	19	11	7.733	1.233	0.588	0.471	0.416	0.535	0	0	1	0	0	0	d	d.125.1.1	A(570-730)
d1orua_	182	167	26	19	16	7.904	0.743	0.563	0.514	0.531	0.555	0	0	1	1	0	0	b	b.58.1.2	A
d1osya_	114	98	23	16	14	5.152	0.767	0.595	0.481	0.517	0.551	0	0	1	0	0	0	b	b.1.21.1	A
d1ou8a_	106	104	21	17	14	4.998	0.677	0.604	0.501	0.640	0.562	0	0	1	1	0	0	b	b.136.1.1	A
d1ouva1	263	239	44	24	16	16.896	1.100	0.384	0.335	0.221	0.362	0	1	0	0	0	0	a	a.118.18.1	A(28-290)
d1ov9a_	45	39	25	13	6	1.950	1.316	0.436	0.425	0.329	0.439	0	1	0	0	0	0	a	a.155.1.1	A
d1ow1a_	167	150	20	18	17	6.120	0.571	0.597	0.540	0.648	0.579	0	0	1	1	0	0	b	b.131.1.3	A
d1owla1	271	251	30	26	17	13.260	0.698	0.514	0.472	0.648	0.501	0	0	1	0	0	0	a	a.99.1.1	A(205-475)
d1owla2	202	176	27	23	17	10.557	0.675	0.556	0.418	0.582	0.496	0	0	1	0	0	0	c	c.28.1.1	A(3-204)
d1oxxk1	110	102	23	14	12	3.864	0.885	0.596	0.557	0.462	0.579	0	0	1	1	0	0	b	b.40.6.3	K(243-352)
d1p0ya1	172	155	39	18	12	8.424	1.300	0.568	0.460	0.494	0.527	0	0	1	0	0	0	a	a.166.1.1	A(311-482)
d1p35a_	299	266	31	24	20	14.880	0.705	0.569	0.468	0.578	0.529	0	0	1	0	0	0	b	b.28.1.1	A
d1p3da1	96	90	18	15	12	3.240	0.667	0.645	0.577	0.785	0.631	0	0	1	1	0	0	c	c.5.1.1	A(11-106)
d1p3da2	152	150	23	18	16	6.624	0.676	0.600	0.543	0.680	0.594	0	0	1	1	0	0	c	c.59.1.1	A(322-473)
d1p3da3	215	202	25	22	16	8.800	0.658	0.629	0.548	0.560	0.602	0	0	1	1	0	0	c	c.72.2.1	A(107-321)
d1p6oa_	156	153	24	16	15	5.760	0.774	0.620	0.566	0.582	0.599	0	0	1	1	0	0	c	c.97.1.2	A
d1p90a_	123	117	22	16	14	4.928	0.733	0.613	0.531	0.646	0.585	0	0	1	1	0	0	c	c.55.5.2	A
d1p9ga_	41	41	12	11	8	1.056	0.632	0.708	0.634	0.823	0.681	0	0	1	1	0	0	g	g.3.1.1	A
d1p9ha_	179	132	35	15	9	4.725	1.458	0.672	0.564	0.581	0.631	0	0	1	1	0	0	b	b.81.3.1	A
d1p9ya_	117	103	34	14	11	5.236	1.360	0.609	0.461	0.649	0.541	0	0	1	0	0	0	d	d.241.2.1	A
d1pb5a_	35	35	14	10	6	0.840	0.875	0.721	0.604	0.726	0.667	0	0	1	1	0	0	g	g.65.1.1	A
d1pbua_	162	158	24	20	15	7.200	0.686	0.620	0.545	0.598	0.590	0	0	1	1	0	0	d	d.58.46.1	A
d1pbya5	108	103	23	15	12	4.140	0.852	0.607	0.550	0.467	0.590	0	0	1	1	0	0	b	b.61.4.1	A(166-273)
d1pbyc_	79	69	20	15	11	3.300	0.769	0.554	0.485	0.713	0.532	0	0	1	0	0	0	a	a.137.9.1	C
d1pc6a_	141	114	31	21	14	9.114	0.886	0.379	0.303	0.532	0.353	0	1	0	0	0	0	d	d.262.1.1	A
d1pd0a1	102	95	27	16	11	4.752	1.000	0.611	0.502	0.555	0.570	0	0	1	1	0	0	a	a.71.2.1	A(647-753)
d1pd0a2	177	148	30	17	14	7.140	0.968	0.601	0.505	0.550	0.560	0	0	1	1	0	0	b	b.2.8.1	A(133-215,553-646)
d1pd0a4	155	128	25	17	13	5.525	0.833	0.598	0.522	0.603	0.569	0	0	1	1	0	0	d	d.109.2.1	A(754-926)
d1pd0a5	80	69	19	15	11	3.135	0.731	0.584	0.504	0.528	0.552	0	0	1	1	0	0	g	g.41.10.1	A(216-300)
d1pd3a_	54	51	25	12	6	1.800	1.389	0.641	0.604	0.416	0.630	0	0	1	1	0	0	a	a.30.3.1	A
d1pfoa1	361	336	46	27	13	16.146	1.150	0.554	0.483	0.541	0.524	0	0	1	0	0	0	f	f.69.1.1	A(30-390)
d1pfoa2	110	99	28	15	11	4.620	1.077	0.602	0.532	0.406	0.579	0	0	1	1	0	0	b	b.183.1.1	A(391-500)
d1pfva1	162	143	27	17	13	5.967	0.900	0.615	0.539	0.730	0.595	0	0	1	1	0	0	a	a.27.1.1	A(389-550)
d1pfva3	35	35	12	9	8	0.864	0.706	0.629	0.630	0.530	0.628	0	0	1	1	1	0	g	g.41.1.1	A(141-175)
d1pi1a1	184	166	26	23	15	8.970	0.684	0.635	0.507	0.638	0.580	0	0	1	1	0	0	a	a.29.7.1	A(12-195)
d1pm4a_	117	111	23	15	13	4.485	0.821	0.616	0.551	0.674	0.589	0	0	1	1	0	0	b	b.135.1.1	A
d1pp0a_	191	184	31	18	15	8.370	0.939	0.594	0.533	0.673	0.579	0	0	1	1	0	0	d	d.103.1.1	A
d1pprm1	156	156	24	21	17	8.568	0.632	0.251	0.362	0.020	0.310	1	0	0	0	1	0	a	a.131.1.1	M(1-156)
d1pu1a_	91	83	28	13	10	3.640	1.217	0.555	0.501	0.563	0.542	0	0	1	1	0	0	d	d.266.1.1	A
d1puca_	101	85	21	17	14	4.998	0.677	0.430	0.384	0.266	0.407	0	1	0	0	0	0	d	d.97.1.1	A
d1pv5a_	261	254	36	20	17	12.240	0.973	0.609	0.510	0.588	0.569	0	0	1	1	0	0	d	d.251.1.1	A
d1pvma3	36	32	19	8	6	0.912	1.357	0.686	0.613	0.764	0.663	0	0	1	1	0	0	g	g.41.13.1	A(143-178)
d1px5a1	146	140	28	19	13	6.916	0.875	0.615	0.509	0.626	0.573	0	0	1	1	0	0	a	a.160.1.2	A(201-346)
d1pxea_	48	45	14	10	8	1.120	0.778	0.695	0.580	0.851	0.648	0	0	1	1	0	0	g	g.73.1.1	A
d1pyya1	61	59	19	10	10	1.900	0.950	0.588	0.577	0.410	0.592	0	0	1	1	0	0	d	d.11.1.1	A(632-692)
d1pz4a1	110	109	21	17	14	4.998	0.677	0.525	0.504	0.496	0.522	0	0	1	1	0	0	d	d.106.1.1	A(1-110)
d1pzqa1	58	46	27	13	7	2.457	1.350	0.433	0.367	0.171	0.399	0	1	0	0	0	0	a	a.34.3.1	A(3-60)
d1pzra_	60	48	28	11	7	2.156	1.556	0.475	0.423	0.614	0.455	0	1	0	0	0	0	a	a.38.2.1	A
d1q16c_	224	193	32	21	15	10.080	0.889	0.453	0.449	0.210	0.459	0	1	0	0	0	0	f	f.21.3.1	C
d1q1va1	67	59	21	11	10	2.310	1.000	0.648	0.568	0.686	0.623	0	0	1	1	0	0	a	a.159.4.1	A(309-375)
d1q2ha_	63	55	26	13	11	3.718	1.083	0.417	0.339	0.600	0.388	0	1	0	0	0	0	a	a.34.4.1	A
d1q2za_	120	116	25	20	11	5.500	0.806	0.537	0.482	0.552	0.519	0	0	1	0	0	0	a	a.118.19.1	A
d1q3qa1	258	230	29	23	16	10.672	0.744	0.591	0.502	0.688	0.554	0	0	1	1	0	0	a	a.129.1.2	A(9-145,406-526)
d1q3qa3	107	107	25	15	11	4.125	0.962	0.598	0.561	0.534	0.592	0	0	1	1	0	0	d	d.56.1.2	A(146-216,370-405)
d1q5ya_	84	81	23	12	11	3.036	1.000	0.575	0.542	0.413	0.565	0	0	1	1	0	0	d	d.58.18.4	A
d1q5za_	145	137	23	20	14	6.440	0.676	0.617	0.509	0.486	0.570	0	0	1	1	0	0	a	a.196.1.1	A
d1q88a_	189	171	24	19	17	7.752	0.667	0.589	0.521	0.679	0.564	0	0	1	1	0	0	e	e.47.1.1	A
d1q8da_	100	94	22	16	12	4.224	0.786	0.613	0.511	0.620	0.576	0	0	1	1	0	0	a	a.228.1.1	A
d1q90a3	39	38	36	5	4	0.720	4.000	0.873	0.762	0.960	0.826	0	0	1	1	0	1	f	f.23.23.1	A(248-286)
d1qd1a1	179	176	23	21	13	6.279	0.676	0.633	0.589	0.575	0.622	0	0	1	1	0	0	d	d.58.34.1	A(2-180)
d1qd5a_	257	239	31	22	18	12.276	0.775	0.537	0.491	0.298	0.518	0	0	1	0	0	0	f	f.4.2.1	A
d1qexa_	288	247	45	25	22	24.750	0.957	0.265	0.239	0.106	0.256	1	0	0	0	0	0	b	b.32.1.1	A
d1qeya_	31	28	27	5	4	0.540	3.000	0.826	0.715	0.870	0.789	0	0	1	1	0	1	h	h.2.1.1	A
d1qf8a_	167	162	31	17	14	7.378	1.000	0.634	0.536	0.642	0.597	0	0	1	1	0	0	g	g.41.4.1	A
d1qhda1	213	202	33	18	17	10.098	0.943	0.626	0.508	0.571	0.578	0	0	1	1	0	0	a	a.115.1.2	A(1-148,333-397)
d1qksa2	432	410	33	28	21	19.404	0.673	0.571	0.529	0.372	0.562	0	0	1	1	0	0	b	b.70.2.1	A(136-567)
d1qmha1	95	88	24	12	12	3.456	1.000	0.612	0.543	0.727	0.590	0	0	1	1	0	0	c	c.47.2.1	A(185-279)
d1qoja_	46	46	22	9	6	1.188	1.467	0.611	0.640	0.572	0.629	0	0	1	1	1	0	a	a.2.9.1	A
d1qoya_	303	260	61	16	13	12.688	2.103	0.567	0.504	0.630	0.549	0	0	1	1	0	1	h	h.4.4.1	A
d1qsaa1	450	413	47	39	18	32.994	0.825	0.209	0.296	0.001	0.251	1	0	0	0	1	0	a	a.118.5.1	A(1-450)
d1qtsa1	133	124	26	15	14	5.460	0.897	0.602	0.527	0.557	0.571	0	0	1	1	0	0	b	b.1.10.1	A(692-824)
d1qtsa2	114	110	21	16	15	5.040	0.677	0.586	0.513	0.633	0.557	0	0	1	1	0	0	d	d.105.1.1	A(825-938)
d1qu7a_	227	198	104	15	8	12.480	4.522	0.332	0.325	0.073	0.331	0	1	0	0	0	1	h	h.4.5.1	A
d1qw2a1	95	92	18	16	12	3.456	0.643	0.602	0.551	0.726	0.589	0	0	1	1	0	0	d	d.249.1.1	A(20-114)
d1qwga_	251	238	28	24	16	10.752	0.700	0.602	0.531	0.509	0.581	0	0	1	1	0	0	c	c.1.27.1	A
d1qwya_	234	226	29	20	19	11.020	0.744	0.579	0.484	0.691	0.546	0	0	1	0	0	0	b	b.84.3.2	A
d1qwza1	214	204	26	22	18	10.296	0.650	0.616	0.522	0.589	0.577	0	0	1	1	0	0	b	b.100.1.1	A(31-244)
d1r0da_	194	183	37	17	12	7.548	1.276	0.591	0.535	0.466	0.576	0	0	1	1	0	0	a	a.216.1.1	A
d1r0ri_	51	47	14	14	8	1.568	0.636	0.695	0.582	0.659	0.636	0	0	1	1	0	0	g	g.68.1.1	I
d1r0va1	78	73	19	17	11	3.553	0.679	0.598	0.508	0.629	0.567	0	0	1	1	0	0	c	c.52.2.1	A(62-139)
d1r0va3	75	69	18	14	11	2.772	0.720	0.624	0.550	0.586	0.591	0	0	1	1	0	0	d	d.75.1.1	A(140-214)
d1r1ra1	218	209	35	22	16	12.320	0.921	0.585	0.462	0.459	0.531	0	0	1	0	0	0	a	a.98.1.1	A(4-221)
d1r29a_	122	104	22	17	13	4.862	0.733	0.618	0.503	0.582	0.569	0	0	1	1	0	0	d	d.42.1.1	A
d1r3ra_	356	347	31	24	22	16.368	0.674	0.556	0.520	0.587	0.550	0	0	1	1	0	0	c	c.1.22.1	A
d1r48a_	33	30	27	5	5	0.675	2.700	0.788	0.683	0.794	0.746	0	0	1	1	0	1	h	h.4.15.1	A
d1r5la1	66	61	19	14	10	2.660	0.792	0.573	0.500	0.662	0.547	0	0	1	1	0	0	a	a.5.3.1	A(25-90)
d1r5la2	185	180	22	21	20	9.240	0.537	0.537	0.497	0.633	0.535	0	0	1	0	0	0	c	c.13.1.1	A(91-275)
d1r5sa1	128	113	60	26	14	21.840	1.500	0.197	0.122	0.458	0.165	1	0	0	0	0	0	f	f.50.1.1	A(5-132)
d1r6ja1	77	76	18	13	12	2.808	0.720	0.573	0.542	0.548	0.566	0	0	1	1	0	0	b	b.36.1.1	A(197-273)
d1r75a_	110	102	22	16	12	4.224	0.786	0.636	0.563	0.717	0.604	0	0	1	1	0	0	b	b.134.1.1	A
d1r7la1	96	91	26	15	10	3.900	1.040	0.663	0.545	0.639	0.615	0	0	1	1	0	0	d	d.277.1.1	A(1-96)
d1r89a3	180	165	38	21	13	10.374	1.118	0.553	0.417	0.585	0.494	0	0	1	0	0	0	d	d.58.16.2	A(258-437)
d1r8ia_	187	176	39	17	13	8.619	1.300	0.576	0.471	0.627	0.534	0	0	1	0	0	0	a	a.8.7.1	A
d1r9fa1	119	111	28	14	12	4.704	1.077	0.630	0.530	0.654	0.593	0	0	1	1	0	0	d	d.255.1.1	A(27-148)
d1ra0a1	103	91	21	16	14	4.704	0.700	0.549	0.442	0.489	0.504	0	0	1	0	0	0	b	b.92.1.2	A(4-55,376-426)
d1ra0a2	320	303	26	23	22	13.156	0.578	0.618	0.552	0.629	0.595	0	0	1	1	0	0	c	c.1.9.5	A(56-375)
d1rcqa1	131	126	23	17	12	4.692	0.793	0.612	0.546	0.516	0.588	0	0	1	1	0	0	b	b.49.2.2	A(1-7,234-357)
d1rcqa2	226	225	27	23	15	9.315	0.711	0.601	0.550	0.576	0.584	0	0	1	1	0	0	c	c.1.6.1	A(8-233)
d1regx_	122	114	21	19	14	5.586	0.636	0.582	0.509	0.451	0.558	0	0	1	1	0	0	d	d.58.27.1	X
d1rf8b1	98	84	27	16	12	5.184	0.964	0.320	0.335	0.130	0.331	0	1	0	0	1	0	a	a.210.1.1	B(217-314)
d1rg8a1	137	137	19	18	16	5.472	0.559	0.590	0.554	0.380	0.577	0	0	1	1	0	0	b	b.42.1.1	A(1-137)
d1rh1a1	291	276	34	24	18	14.688	0.810	0.579	0.474	0.616	0.537	0	0	1	0	0	0	b	b.110.1.1	A(10-312)
d1rh5b_	56	46	42	15	6	3.780	2.000	0.214	0.241	0.157	0.232	1	0	0	0	1	1	f	f.23.28.1	B
d1rh5c_	32	24	24	5	3	0.360	3.000	0.890	0.769	0.789	0.834	0	0	1	1	0	1	f	f.17.6.1	C
d1ri6a1	330	322	26	25	21	13.650	0.565	0.530	0.525	0.250	0.531	0	0	1	1	0	0	b	b.69.11.1	A(4-333)
d1rjuv_	36	35	13	9	9	1.053	0.722	0.665	0.575	0.603	0.629	0	0	1	1	0	0	g	g.46.1.1	V
d1rk8c_	33	27	20	8	6	0.960	1.429	0.636	0.530	0.796	0.590	0	0	1	1	0	0	b	b.72.3.1	C
d1rkia1	98	91	22	16	11	3.872	0.815	0.594	0.544	0.587	0.587	0	0	1	1	0	0	d	d.308.1.2	A(1-98)
d1ro2a_	210	198	29	20	18	10.440	0.763	0.564	0.494	0.584	0.548	0	0	1	0	0	0	d	d.264.1.2	A
d1roca1	153	150	33	15	13	6.435	1.179	0.588	0.532	0.530	0.570	0	0	1	1	0	0	b	b.1.22.1	A(2-154)
d1rp3b_	77	69	39	15	8	4.680	1.696	0.110	0.225	0.000	0.166	1	0	0	0	1	0	a	a.137.11.1	B
d1rq6a_	62	56	16	13	11	2.288	0.667	0.548	0.493	0.399	0.527	0	0	1	0	0	0	a	a.4.15.1	A
d1rrza_	66	62	19	13	11	2.717	0.792	0.607	0.510	0.723	0.575	0	0	1	1	0	0	a	a.7.10.1	A
d1rssa_	140	119	26	16	13	5.408	0.897	0.629	0.523	0.602	0.586	0	0	1	1	0	0	a	a.75.1.1	A
d1rtqa_	291	291	27	24	19	12.312	0.628	0.606	0.549	0.606	0.589	0	0	1	1	0	0	c	c.56.5.4	A
d1rwaa1	369	363	31	27	21	17.577	0.646	0.482	0.476	0.173	0.482	0	1	0	0	0	0	a	a.102.3.2	A(4-372)
d1rwaa2	113	103	19	16	12	3.648	0.679	0.596	0.526	0.503	0.563	0	0	1	1	0	0	b	b.24.1.1	A(645-757)
d1ryla_	157	154	27	18	14	6.804	0.844	0.595	0.552	0.465	0.584	0	0	1	1	0	0	d	d.276.1.1	A
d1ryqa1	59	59	19	12	9	2.052	0.905	0.646	0.574	0.770	0.623	0	0	1	1	0	0	g	g.41.9.3	A(3-61)
d1s0pa_	176	175	32	17	15	8.160	1.000	0.587	0.525	0.589	0.571	0	0	1	1	0	0	a	a.192.1.1	A
d1s1cx1	67	65	64	7	5	2.240	5.333	0.666	0.557	0.759	0.622	0	0	1	1	0	1	h	h.1.27.1	X(947-1013)
d1s1da_	317	309	28	24	21	14.112	0.622	0.585	0.525	0.536	0.568	0	0	1	1	0	0	b	b.67.3.1	A
d1s2xa1	179	173	41	16	12	7.872	1.464	0.566	0.489	0.687	0.537	0	0	1	0	0	0	a	a.47.3.1	A(1-179)
d1s7ma_	158	129	44	25	11	12.100	1.222	0.348	0.248	0.474	0.305	1	0	0	0	0	0	b	b.144.1.1	A
d1s7za_	106	101	27	15	12	4.860	1.000	0.631	0.513	0.579	0.580	0	0	1	1	0	0	a	a.159.3.1	A
d1s99a_	186	172	27	21	15	8.505	0.750	0.631	0.502	0.589	0.573	0	0	1	1	0	0	d	d.58.48.2	A
d1saua_	114	114	23	15	14	4.830	0.793	0.610	0.569	0.691	0.606	0	0	1	1	0	0	d	d.203.1.1	A
d1sbxa1	103	95	21	15	13	4.095	0.750	0.613	0.517	0.587	0.571	0	0	1	1	0	0	a	a.6.1.4	A(90-192)
d1sdia1	212	198	24	22	18	9.504	0.600	0.601	0.502	0.542	0.564	0	0	1	1	0	0	a	a.198.1.1	A(2-213)
d1seda_	112	99	31	14	11	4.774	1.240	0.622	0.514	0.570	0.574	0	0	1	1	0	0	a	a.219.1.1	A
d1seia_	130	118	23	16	14	5.152	0.767	0.592	0.529	0.416	0.564	0	0	1	1	0	0	d	d.140.1.1	A
d1sf8a1	114	109	27	17	13	5.967	0.900	0.532	0.460	0.651	0.515	0	0	1	0	0	0	d	d.271.1.1	A(511-624)
d1sf9a1	104	94	23	19	10	4.370	0.793	0.478	0.447	0.615	0.472	0	1	0	0	0	0	b	b.34.15.1	A(25-128)
d1sg2a_	141	124	45	13	11	6.435	1.875	0.299	0.373	0.102	0.336	1	0	0	0	1	0	f	f.48.1.1	A
d1sg4a1	249	247	30	20	20	12.000	0.750	0.590	0.495	0.677	0.551	0	0	1	0	0	0	c	c.14.1.3	A(2-250)
d1sg7a1	75	69	22	13	10	2.860	0.957	0.738	0.574	0.784	0.665	0	0	1	1	0	0	a	a.239.1.1	A(22-96)
d1sgoa_	139	98	24	18	15	6.480	0.727	0.558	0.409	0.430	0.491	0	0	1	0	0	0	d	d.82.3.1	A
d1sj7a1	167	167	39	14	12	6.552	1.500	0.583	0.510	0.609	0.553	0	0	1	1	0	0	a	a.215.1.1	A(488-654)
d1sknp_	74	64	27	14	8	3.024	1.227	0.560	0.461	0.541	0.519	0	0	1	0	0	0	a	a.37.1.1	P
d1skva1	62	59	30	10	7	2.100	1.765	0.668	0.574	0.512	0.620	0	0	1	1	0	0	a	a.30.5.1	A(2-63)
d1slqa_	270	230	44	20	14	12.320	1.294	0.535	0.451	0.530	0.506	0	0	1	0	0	0	f	f.47.1.1	A
d1slua_	131	112	31	19	12	7.068	1.000	0.546	0.422	0.607	0.496	0	0	1	0	0	0	b	b.16.1.1	A
d1smba_	149	144	26	16	15	6.240	0.839	0.594	0.529	0.612	0.575	0	0	1	1	0	0	d	d.111.1.1	A
d1so9a_	131	125	30	15	11	4.950	1.154	0.577	0.541	0.574	0.568	0	0	1	1	0	0	b	b.146.1.1	A
d1sopa_	24	24	11	9	7	0.693	0.688	0.687	0.572	0.819	0.636	0	0	1	1	0	0	g	g.71.1.1	A
d1sr8a_	282	269	36	25	15	13.500	0.900	0.486	0.464	0.263	0.487	0	1	0	0	0	0	e	e.54.1.1	A
d1sr9a3	115	101	20	16	14	4.480	0.667	0.575	0.490	0.549	0.546	0	0	1	0	0	0	d	d.270.1.1	A(492-643)
d1srqa_	330	297	45	22	18	17.820	1.125	0.504	0.431	0.503	0.478	0	0	1	0	0	0	e	e.55.1.1	A
d1ss3a_	50	43	24	16	8	3.072	1.000	0.435	0.323	0.497	0.385	0	1	0	0	0	0	g	g.2.3.1	A
d1ss6a1	100	88	23	18	11	4.554	0.793	0.581	0.470	0.550	0.549	0	0	1	0	0	0	d	d.245.1.1	A(3-102)
d1syxb_	62	61	17	14	9	2.142	0.739	0.666	0.578	0.430	0.625	0	0	1	1	0	0	d	d.76.1.1	B
d1sz7a_	159	153	26	17	16	7.072	0.788	0.539	0.501	0.643	0.538	0	0	1	1	0	0	d	d.278.1.2	A
d1szha1	146	136	29	16	15	6.960	0.935	0.615	0.485	0.716	0.563	0	0	1	0	0	0	a	a.226.1.1	A(19-164)
d1szia_	194	174	39	17	13	8.619	1.300	0.519	0.477	0.485	0.503	0	0	1	0	0	0	a	a.24.23.1	A
d1t07a1	79	77	23	14	12	3.864	0.885	0.572	0.500	0.565	0.555	0	0	1	1	0	0	d	d.279.1.1	A(1-79)
d1t15a1	109	105	21	16	14	4.704	0.700	0.625	0.538	0.659	0.594	0	0	1	1	0	0	c	c.15.1.3	A(1649-1757)
d1t1ea2	179	149	31	21	15	9.765	0.861	0.341	0.332	0.471	0.346	0	1	0	0	0	0	d	d.58.3.2	A(12-190)
d1t1ua1	382	340	38	28	22	23.408	0.760	0.547	0.390	0.633	0.478	0	0	1	0	0	0	c	c.43.1.3	A(20-401)
d1t2da2	165	148	26	19	17	8.398	0.722	0.519	0.419	0.541	0.474	0	0	1	0	0	0	d	d.162.1.1	A(151-315)
d1t36a1	153	135	29	21	13	7.917	0.853	0.437	0.403	0.319	0.429	0	1	0	0	0	0	a	a.92.1.1	A(403-555)
d1t36b1	151	143	24	16	14	5.376	0.800	0.605	0.562	0.662	0.587	0	0	1	1	0	0	c	c.8.3.1	B(2-152)
d1t3ja_	62	56	58	6	4	1.392	5.800	0.780	0.662	0.829	0.734	0	0	1	1	0	1	h	h.4.16.1	A
d1t3ta1	68	60	18	12	11	2.376	0.783	0.570	0.526	0.368	0.552	0	0	1	1	0	0	a	a.5.10.1	A(153-220)
d1t50a_	58	55	16	13	8	1.664	0.762	0.515	0.534	0.552	0.532	0	0	1	1	1	0	g	g.63.1.1	A
d1t6aa_	124	110	49	19	13	12.103	1.531	0.360	0.236	0.408	0.305	1	0	0	0	0	0	d	d.129.8.1	A
d1t6fa_	37	37	37	5	5	0.925	3.700	0.762	0.657	0.818	0.728	0	0	1	1	0	1	h	h.1.28.1	A
d1t6ua_	117	106	29	12	11	3.828	1.261	0.590	0.586	0.391	0.592	0	0	1	1	0	0	a	a.24.22.1	A
d1t77a1	304	274	29	25	22	15.950	0.617	0.573	0.461	0.533	0.531	0	0	1	0	0	0	a	a.169.1.1	A(2186-2489)
d1t8ka_	77	76	17	15	11	2.805	0.654	0.601	0.569	0.383	0.589	0	0	1	1	0	0	a	a.28.1.1	A
d1t95a1	75	69	25	12	11	3.300	1.087	0.552	0.468	0.448	0.519	0	0	1	0	0	0	a	a.5.8.1	A(87-161)
d1t95a2	76	75	20	14	12	3.360	0.769	0.615	0.523	0.621	0.580	0	0	1	1	0	0	d	d.235.1.2	A(11-86)
d1t98a2	163	156	42	14	12	7.056	1.615	0.561	0.524	0.487	0.551	0	0	1	1	0	0	a	a.47.6.1	A(119-281)
d1tbaa_	67	59	25	13	8	2.600	1.190	0.556	0.471	0.672	0.531	0	0	1	0	0	0	a	a.15.1.1	A
d1tbfa_	326	299	30	23	23	15.870	0.652	0.553	0.489	0.598	0.539	0	0	1	0	0	0	a	a.211.1.2	A
d1td6a_	286	268	29	26	18	13.572	0.659	0.498	0.475	0.244	0.486	0	1	0	0	0	0	a	a.234.1.1	A
d1tf5a1	122	111	27	16	11	4.752	1.000	0.625	0.539	0.689	0.591	0	0	1	1	0	0	a	a.162.1.1	A(227-348)
d1tf5a2	210	182	44	24	12	12.672	1.222	0.512	0.392	0.727	0.470	0	0	1	0	0	0	a	a.172.1.1	A(571-780)
d1tfea_	142	124	34	15	13	6.630	1.214	0.579	0.470	0.744	0.539	0	0	1	0	0	0	d	d.43.1.1	A
d1tifa_	76	69	19	15	12	3.420	0.704	0.599	0.492	0.613	0.560	0	0	1	0	0	0	d	d.15.8.1	A
d1tiga_	88	86	23	14	10	3.220	0.958	0.602	0.547	0.482	0.573	0	0	1	1	0	0	d	d.68.1.1	A
d1tj2a1	100	90	50	25	12	15.000	1.351	0.073	0.108	0.008	0.092	1	0	0	0	1	0	a	a.176.1.1	A(89-261)
d1tjla1	104	102	41	15	10	6.150	1.640	0.493	0.407	0.584	0.458	0	1	0	0	0	0	a	a.2.14.1	A(7-110)
d1tjxa1	149	146	28	17	13	6.188	0.933	0.593	0.543	0.612	0.582	0	0	1	1	0	0	b	b.7.1.2	A(271-419)
d1tkea1	62	62	16	13	11	2.288	0.667	0.594	0.534	0.577	0.569	0	0	1	1	0	0	d	d.15.10.1	A(1-62)
d1tkea2	162	151	23	19	14	6.118	0.697	0.602	0.558	0.627	0.589	0	0	1	1	0	0	d	d.67.1.1	A(63-224)
d1tl2a_	235	233	27	26	14	9.828	0.675	0.540	0.550	0.210	0.550	0	0	1	1	1	0	b	b.67.1.1	A
d1tlha_	89	87	19	16	12	3.648	0.679	0.558	0.518	0.326	0.540	0	0	1	1	0	0	a	a.150.1.1	A
d1tlja_	189	180	35	17	15	8.925	1.094	0.504	0.461	0.460	0.492	0	0	1	0	0	0	d	d.282.1.1	A
d1tlwa1	248	230	34	22	17	12.716	0.872	0.451	0.444	0.226	0.454	0	1	0	0	0	0	f	f.4.6.1	A(9-272)
d1tm9a_	137	125	23	17	15	5.865	0.719	0.595	0.513	0.763	0.564	0	0	1	1	0	0	a	a.225.1.1	A
d1ts9a_	98	93	26	14	11	4.004	1.040	0.596	0.519	0.663	0.569	0	0	1	1	0	0	b	b.137.1.1	A
d1tt8a_	164	162	22	20	17	7.480	0.595	0.565	0.537	0.566	0.563	0	0	1	1	0	0	d	d.190.1.1	A
d1tula_	102	97	25	14	13	4.550	0.926	0.607	0.531	0.621	0.579	0	0	1	1	0	0	b	b.85.5.1	A
d1tv8a_	327	311	32	24	22	16.896	0.696	0.454	0.461	0.232	0.467	0	1	0	0	1	0	c	c.1.28.3	A
d1twda_	234	215	25	22	16	8.800	0.658	0.598	0.545	0.478	0.582	0	0	1	1	0	0	c	c.1.30.1	A
d1twfa_	1419	1244	68	57	35	135.660	0.739	0.327	0.248	0.528	0.300	1	0	0	0	0	0	e	e.29.1.2	A
d1twfc2	131	123	28	15	14	5.880	0.966	0.599	0.495	0.413	0.552	0	0	1	0	0	0	d	d.181.1.1	C(42-172)
d1twff_	84	78	27	14	9	3.402	1.174	0.592	0.499	0.536	0.554	0	0	1	0	0	0	a	a.143.1.2	F
d1twfj_	65	58	17	15	10	2.550	0.680	0.592	0.513	0.749	0.561	0	0	1	1	0	0	a	a.4.11.1	J
d1tx4a_	196	184	27	22	15	8.910	0.730	0.603	0.522	0.581	0.575	0	0	1	1	0	0	a	a.116.1.1	A
d1tx9a1	138	126	21	16	16	5.376	0.656	0.584	0.525	0.680	0.568	0	0	1	1	0	0	a	a.84.1.1	A(7-144)
d1tzpa_	240	229	31	22	16	10.912	0.816	0.601	0.513	0.680	0.571	0	0	1	1	0	0	d	d.65.1.3	A
d1tzva_	141	133	24	17	15	6.120	0.750	0.612	0.541	0.653	0.590	0	0	1	1	0	0	a	a.79.1.1	A
d1u07a_	90	81	24	11	10	2.640	1.143	0.598	0.577	0.517	0.595	0	0	1	1	0	0	d	d.212.1.2	A
d1u0sa_	86	86	21	13	12	3.276	0.840	0.580	0.560	0.372	0.576	0	0	1	1	0	0	d	d.58.24.1	A
d1u2ha_	96	88	25	11	10	2.750	1.190	0.603	0.585	0.688	0.596	0	0	1	1	0	0	b	b.1.1.0	A
d1u5ka2	157	150	27	18	14	6.804	0.844	0.586	0.523	0.625	0.568	0	0	1	1	0	0	g	g.45.1.2	A(81-237)
d1u5pa1	110	109	37	11	10	4.070	1.762	0.622	0.563	0.564	0.603	0	0	1	1	0	0	a	a.7.1.1	A(1662-1771)
d1u61a_	127	112	21	17	14	4.998	0.677	0.591	0.510	0.572	0.563	0	0	1	1	0	0	a	a.149.1.1	A
d1u6ka_	282	265	29	29	16	13.456	0.644	0.570	0.482	0.553	0.538	0	0	1	0	0	0	c	c.127.1.1	A
d1u7la_	364	333	70	25	15	26.250	1.750	0.437	0.338	0.501	0.393	0	1	0	0	0	0	e	e.57.1.1	A
d1u84a_	81	81	20	15	11	3.300	0.769	0.612	0.571	0.464	0.604	0	0	1	1	0	0	a	a.230.1.1	A
d1u94a2	60	59	18	12	9	1.944	0.857	0.601	0.575	0.370	0.589	0	0	1	1	0	0	d	d.48.1.1	A(269-328)
d1u9la_	68	66	17	14	9	2.142	0.739	0.608	0.586	0.481	0.599	0	0	1	1	0	0	a	a.60.4.2	A
d1uc4a_	551	510	39	27	23	24.219	0.780	0.605	0.512	0.671	0.572	0	0	1	1	0	0	c	c.1.19.3	A
d1uc4b_	178	170	23	20	15	6.900	0.657	0.608	0.548	0.645	0.587	0	0	1	1	0	0	c	c.51.3.1	B
d1uc4g_	137	124	31	20	12	7.440	0.969	0.483	0.400	0.562	0.449	0	1	0	0	0	0	a	a.23.2.1	G
d1ucda_	190	180	26	18	16	7.488	0.765	0.633	0.561	0.715	0.609	0	0	1	1	0	0	d	d.124.1.1	A
d1ucsa_	64	63	17	11	10	1.870	0.810	0.587	0.603	0.530	0.601	0	0	1	1	1	0	b	b.85.1.1	A
d1ud9a1	119	114	21	17	14	4.998	0.677	0.535	0.509	0.279	0.520	0	0	1	1	0	0	d	d.131.1.2	A(1-119)
d1udxa1	156	126	43	11	10	4.730	2.048	0.647	0.548	0.628	0.614	0	0	1	1	0	1	b	b.117.1.1	A(1-156)
d1udxa3	76	74	21	14	12	3.528	0.808	0.531	0.477	0.514	0.519	0	0	1	0	0	0	d	d.242.1.1	A(341-416)
d1ueba1	63	62	22	12	9	2.376	1.048	0.628	0.569	0.495	0.613	0	0	1	1	0	0	b	b.34.5.2	A(1-63)
d1ufia1	46	41	19	13	5	1.235	1.056	0.673	0.619	0.682	0.653	0	0	1	1	0	0	a	a.30.4.1	A(5-50)
d1ufya_	121	112	22	18	11	4.356	0.759	0.602	0.559	0.566	0.589	0	0	1	1	0	0	d	d.79.1.2	A
d1ufza1	70	61	26	12	11	3.432	1.130	0.535	0.420	0.618	0.490	0	0	1	0	0	0	a	a.5.9.1	A(8-77)
d1ug7a1	115	107	25	15	13	4.875	0.893	0.650	0.543	0.462	0.606	0	0	1	1	0	0	a	a.24.24.1	A(8-122)
d1ugia_	83	82	20	16	10	3.200	0.769	0.593	0.534	0.782	0.579	0	0	1	1	0	0	d	d.17.5.1	A
d1uj8a1	64	64	16	14	11	2.464	0.640	0.620	0.584	0.567	0.612	0	0	1	1	0	0	a	a.159.5.1	A(13-76)
d1um0a_	365	319	36	26	20	18.720	0.783	0.559	0.430	0.717	0.504	0	0	1	0	0	0	d	d.258.1.1	A
d1uoya_	64	61	15	12	9	1.620	0.714	0.662	0.608	0.642	0.649	0	0	1	1	0	0	g	g.3.19.1	A
d1uptb_	58	56	23	15	6	2.070	1.095	0.582	0.533	0.576	0.572	0	0	1	1	0	0	a	a.193.1.1	B
d1urja_	1029	880	53	35	32	59.360	0.791	0.538	0.395	0.567	0.473	0	0	1	0	0	0	e	e.58.1.1	A
d1us0a_	314	299	29	25	20	14.500	0.644	0.597	0.526	0.605	0.576	0	0	1	1	0	0	c	c.1.7.1	A
d1us6a_	91	81	31	13	9	3.627	1.409	0.602	0.488	0.515	0.553	0	0	1	0	0	0	a	a.2.13.1	A
d1us7b_	194	168	60	17	12	12.240	2.069	0.473	0.353	0.715	0.424	0	1	0	0	0	1	a	a.205.1.1	B
d1usda_	42	37	39	5	4	0.780	4.333	0.850	0.739	0.874	0.811	0	0	1	1	0	1	h	h.1.29.1	A
d1usma_	77	73	20	13	11	2.860	0.833	0.650	0.580	0.709	0.626	0	0	1	1	0	0	d	d.74.1.1	A
d1usub_	132	131	34	13	12	5.304	1.360	0.576	0.558	0.514	0.580	0	0	1	1	0	0	d	d.83.2.1	B
d1ut7a1	144	124	26	18	13	6.084	0.839	0.605	0.510	0.701	0.568	0	0	1	1	0	0	b	b.143.1.1	A(1-163)
d1utga_	70	64	19	15	9	2.565	0.792	0.533	0.490	0.579	0.528	0	0	1	0	0	0	a	a.101.1.1	A
d1utya_	153	133	32	18	14	8.064	1.000	0.626	0.446	0.548	0.544	0	0	1	0	0	0	b	b.147.1.1	A
d1uuja_	76	64	29	13	9	3.393	1.318	0.438	0.403	0.448	0.429	0	1	0	0	0	0	a	a.221.1.1	A
d1uuya_	161	156	21	19	15	5.985	0.618	0.584	0.537	0.558	0.571	0	0	1	1	0	0	c	c.57.1.1	A
d1uv7a_	76	76	20	13	11	2.860	0.833	0.584	0.566	0.476	0.579	0	0	1	1	0	0	d	d.67.4.1	A
d1uwka_	554	533	35	29	25	25.375	0.648	0.586	0.522	0.415	0.565	0	0	1	1	0	0	e	e.51.1.1	A
d1ux6a2	124	112	31	15	10	4.650	1.240	0.477	0.458	0.631	0.480	0	1	0	0	0	0	g	g.75.1.1	A(813-936)
d1uxya2	142	116	25	16	13	5.200	0.862	0.591	0.508	0.569	0.563	0	0	1	1	0	0	d	d.146.1.1	A(201-342)
d1uynx_	279	270	41	18	16	11.808	1.206	0.481	0.470	0.707	0.495	0	1	0	0	0	0	f	f.4.5.1	X
d1uz3a_	102	81	32	14	11	4.928	1.280	0.593	0.415	0.745	0.512	0	0	1	0	0	0	a	a.283.1.1	A
d1uzka3	66	63	19	14	9	2.394	0.826	0.649	0.517	0.705	0.593	0	0	1	1	0	0	g	g.23.1.1	A(1529-1604)
d1v0wa1	256	218	26	23	19	11.362	0.619	0.582	0.467	0.611	0.533	0	0	1	0	0	0	d	d.136.1.2	A(6-263)
d1v2za1	105	94	26	16	10	4.160	1.000	0.607	0.536	0.608	0.579	0	0	1	1	0	0	a	a.186.1.1	A(174-278)
d1v30a1	110	109	21	16	13	4.368	0.724	0.571	0.568	0.473	0.582	0	0	1	1	0	0	d	d.269.1.1	A(7-116)
d1v37a_	171	169	24	20	15	7.200	0.686	0.542	0.541	0.688	0.558	0	0	1	1	0	0	c	c.60.1.1	A
d1v58a2	60	53	16	13	9	1.872	0.727	0.623	0.537	0.754	0.578	0	0	1	1	0	0	d	d.17.3.1	A(2-61)
d1v5ra1	84	75	18	15	13	3.510	0.643	0.595	0.482	0.421	0.537	0	0	1	0	0	0	d	d.82.4.1	A(8-91)
d1v65a1	51	38	29	11	7	2.233	1.611	0.415	0.352	0.535	0.394	0	1	0	0	0	0	a	a.212.1.1	A(8-58)
d1v6pa_	62	60	20	14	8	2.240	0.909	0.688	0.556	0.699	0.635	0	0	1	1	0	0	g	g.7.1.1	A
d1v74b_	87	81	24	13	11	3.432	1.000	0.610	0.543	0.427	0.587	0	0	1	1	0	0	a	a.24.20.1	B
d1v7za_	257	231	32	22	16	11.264	0.842	0.608	0.514	0.610	0.572	0	0	1	1	0	0	c	c.125.1.1	A
d1v8ca2	78	75	23	13	12	3.588	0.920	0.622	0.525	0.458	0.584	0	0	1	1	0	0	d	d.129.5.1	A(88-165)
d1v9da_	308	258	57	21	15	17.955	1.583	0.417	0.355	0.211	0.386	0	1	0	0	0	0	a	a.207.1.1	A
d1v9ja1	86	76	21	14	12	3.528	0.808	0.575	0.505	0.394	0.543	0	0	1	1	0	0	d	d.52.6.1	A(28-113)
d1v9ma_	312	310	29	25	23	16.675	0.604	0.532	0.461	0.516	0.502	0	0	1	0	0	0	f	f.40.1.1	A
d1vaja1	203	200	29	20	17	9.860	0.784	0.569	0.486	0.643	0.536	0	0	1	0	0	0	d	d.309.1.1	A(3-205)
d1vbwa_	68	66	20	14	8	2.240	0.909	0.605	0.577	0.732	0.603	0	0	1	1	0	0	d	d.40.1.1	A
d1vcca_	77	76	19	17	10	3.230	0.704	0.602	0.533	0.630	0.575	0	0	1	1	0	0	d	d.121.1.1	A
d1vcta1	99	94	33	12	10	3.960	1.500	0.621	0.539	0.481	0.589	0	0	1	1	0	0	a	a.7.12.1	A(9-107)
d1vd6a_	218	207	28	22	15	9.240	0.757	0.619	0.537	0.533	0.587	0	0	1	1	0	0	c	c.1.18.3	A
d1vdza2	77	72	20	13	10	2.600	0.870	0.551	0.534	0.373	0.552	0	0	1	1	0	0	b	b.84.5.1	A(114-190)
d1vf6a_	58	51	29	12	9	3.132	1.381	0.376	0.362	0.480	0.383	0	1	0	0	0	0	a	a.194.1.1	A
d1vf7a_	237	196	47	21	13	12.831	1.382	0.384	0.343	0.457	0.368	0	1	0	0	0	0	f	f.46.1.1	A
d1vfia1	91	77	28	12	10	3.360	1.273	0.454	0.417	0.516	0.434	0	1	0	0	0	0	g	g.84.1.1	A(5-95)
d1vh4a_	410	378	29	28	25	20.300	0.547	0.595	0.485	0.578	0.552	0	0	1	0	0	0	b	b.80.6.1	A
d1vi6a_	193	183	27	21	14	7.938	0.771	0.626	0.544	0.557	0.595	0	0	1	1	0	0	c	c.23.15.1	A
d1viba_	55	52	25	9	6	1.350	1.667	0.692	0.670	0.646	0.694	0	0	1	1	0	0	g	g.2.2.1	A
d1vioa2	56	55	16	11	10	1.760	0.762	0.633	0.583	0.493	0.613	0	0	1	1	0	0	d	d.66.1.5	A(2-57)
d1vjfa_	168	159	22	19	17	7.106	0.611	0.586	0.517	0.572	0.566	0	0	1	1	0	0	d	d.116.1.1	A
d1vjla1	142	130	27	20	13	7.020	0.818	0.616	0.477	0.624	0.550	0	0	1	0	0	0	d	d.257.1.1	A(1-150)
d1vk1a_	232	221	30	21	17	10.710	0.789	0.552	0.494	0.454	0.528	0	0	1	0	0	0	d	d.268.1.2	A
d1vkea_	117	109	24	18	15	6.480	0.727	0.486	0.401	0.693	0.459	0	1	0	0	0	0	a	a.152.1.2	A
d1vkfa_	172	168	25	22	13	7.150	0.714	0.603	0.545	0.533	0.586	0	0	1	1	0	0	c	c.1.29.1	A
d1vkma1	284	279	27	23	20	12.420	0.628	0.574	0.519	0.528	0.554	0	0	1	1	0	0	c	c.138.1.1	A(1-284)
d1vkya_	280	261	38	21	19	15.162	0.950	0.501	0.430	0.527	0.476	0	0	1	0	0	0	e	e.53.1.1	A
d1vlra2	101	88	29	16	12	5.568	1.036	0.410	0.356	0.541	0.391	0	1	0	0	0	0	d	d.246.1.1	A(39-145)
d1vlya1	82	74	17	15	12	3.060	0.630	0.598	0.527	0.565	0.571	0	0	1	1	0	0	b	b.44.2.1	A(244-325)
d1vlya2	241	231	30	21	16	10.080	0.811	0.586	0.531	0.450	0.566	0	0	1	1	0	0	d	d.250.1.1	A(3-243)
d1vmba_	107	95	23	15	12	4.140	0.852	0.614	0.561	0.530	0.606	0	0	1	1	0	0	d	d.58.14.1	A
d1vmha_	129	123	27	16	12	5.184	0.964	0.614	0.523	0.715	0.583	0	0	1	1	0	0	d	d.273.1.1	A
d1vmoa_	163	153	26	16	15	6.240	0.839	0.601	0.553	0.511	0.586	0	0	1	1	0	0	b	b.77.1.1	A
d1vnsa_	574	560	38	29	25	27.550	0.704	0.615	0.516	0.574	0.576	0	0	1	1	0	0	a	a.111.1.3	A
d1vp7a_	68	62	37	10	8	2.960	2.056	0.589	0.457	0.642	0.538	0	0	1	0	0	1	a	a.7.13.1	A
d1vp8a1	189	178	23	22	17	8.602	0.590	0.576	0.492	0.646	0.544	0	0	1	0	0	0	c	c.49.1.2	A(1-189)
d1vpqa1	259	253	26	23	20	11.960	0.605	0.577	0.532	0.629	0.568	0	0	1	1	0	0	c	c.1.32.1	A(1-259)
d1vq0a1	230	221	27	21	18	10.206	0.692	0.582	0.516	0.594	0.565	0	0	1	1	0	0	d	d.193.1.1	A(1-230)
d1vq0a2	57	57	20	13	9	2.340	0.909	0.583	0.486	0.667	0.532	0	0	1	0	0	0	g	g.81.1.1	A(231-287)
d1vq811	56	47	24	12	9	2.592	1.143	0.332	0.327	0.506	0.336	0	1	0	0	0	0	g	g.41.8.2	1(1-56)
d1vq821	46	42	28	11	7	2.156	1.556	0.480	0.383	0.718	0.446	0	1	0	0	0	0	a	a.137.1.1	2(1-49)
d1vq8e1	79	77	21	13	12	3.276	0.840	0.626	0.528	0.667	0.584	0	0	1	1	0	0	d	d.141.1.1	E(1-79)
d1vq8h1	152	138	32	16	12	6.144	1.143	0.602	0.522	0.611	0.571	0	0	1	1	0	0	d	d.41.4.1	H(1-163)
d1vq8l1	145	131	51	21	15	16.065	1.417	0.157	0.170	0.034	0.164	1	0	0	0	1	0	c	c.12.1.1	L(1-150)
d1vq8n1	186	155	29	19	14	7.714	0.879	0.606	0.492	0.667	0.562	0	0	1	0	0	0	c	c.55.4.1	N(1-186)
d1vq8p1	143	131	57	20	14	15.960	1.676	0.095	0.165	0.001	0.132	1	0	0	0	1	0	a	a.94.1.1	P(1-143)
d1vq8v1	65	65	24	11	9	2.376	1.200	0.592	0.531	0.585	0.565	0	0	1	1	0	0	a	a.2.2.1	V(1-65)
d1vq8w1	154	146	25	16	15	6.000	0.806	0.575	0.539	0.662	0.571	0	0	1	1	0	0	d	d.59.1.1	W(1-154)
d1vq8x1	82	80	22	12	11	2.904	0.957	0.610	0.556	0.700	0.583	0	0	1	1	0	0	d	d.29.1.1	X(7-88)
d1vq8y1	142	123	38	21	11	8.778	1.188	0.349	0.327	0.158	0.344	0	1	0	0	0	0	c	c.9.2.1	Y(95-236)
d1vr0a1	235	228	26	21	17	9.282	0.684	0.610	0.556	0.577	0.591	0	0	1	1	0	0	c	c.148.1.1	A(1-235)
d1vr4a1	103	87	27	15	10	4.050	1.080	0.550	0.452	0.488	0.501	0	0	1	0	0	0	d	d.230.5.1	A(1-103)
d1vr7a_	120	109	24	15	12	4.320	0.889	0.607	0.566	0.508	0.596	0	0	1	1	0	0	d	d.156.1.2	A
d1vr8a1	127	126	21	18	16	6.048	0.618	0.621	0.528	0.656	0.586	0	0	1	1	0	0	d	d.312.1.1	A(25-154)
d1vrma1	309	290	32	26	18	14.976	0.727	0.546	0.475	0.572	0.523	0	0	1	0	0	0	d	d.96.2.1	A(44-352)
d1vsga_	362	301	62	19	15	17.670	1.824	0.551	0.422	0.386	0.493	0	0	1	0	0	0	h	h.4.1.1	A
d1vyia_	111	104	25	15	12	4.500	0.926	0.621	0.553	0.717	0.600	0	0	1	1	0	0	d	d.293.1.1	A
d1vyra_	363	361	30	26	20	15.600	0.652	0.576	0.532	0.597	0.564	0	0	1	1	0	0	c	c.1.4.1	A
d1w0na_	120	119	22	15	13	4.290	0.786	0.611	0.566	0.442	0.591	0	0	1	1	0	0	b	b.18.1.28	A
d1w26a1	185	177	31	25	22	17.050	0.660	0.235	0.236	0.027	0.234	1	0	0	0	1	0	a	a.223.1.1	A(248-432)
d1w41a1	99	96	17	15	12	3.060	0.630	0.607	0.582	0.617	0.610	0	0	1	1	0	0	d	d.79.3.1	A(1-99)
d1w66a1	216	213	27	21	16	9.072	0.730	0.578	0.521	0.569	0.556	0	0	1	1	0	0	d	d.104.1.3	A(1-216)
d1w7ca1	464	376	35	31	21	22.785	0.673	0.572	0.442	0.562	0.518	0	0	1	0	0	0	b	b.30.2.1	A(316-779)
d1w7ca2	127	108	30	16	11	5.280	1.111	0.594	0.493	0.698	0.554	0	0	1	0	0	0	d	d.17.2.1	A(43-169)
d1w7ja1	61	60	18	14	10	2.520	0.750	0.564	0.467	0.422	0.519	0	0	1	0	0	0	b	b.34.3.1	A(2-62)
d1wb9a1	297	249	54	19	16	16.416	1.543	0.400	0.365	0.627	0.396	0	1	0	0	0	0	a	a.113.1.1	A(270-566)
d1wb9a3	153	137	20	18	15	5.400	0.606	0.621	0.562	0.594	0.604	0	0	1	1	0	0	c	c.55.6.1	A(117-269)
d1wb9a4	115	107	23	17	13	5.083	0.767	0.612	0.509	0.525	0.572	0	0	1	1	0	0	d	d.75.2.1	A(2-116)
d1wcwa1	252	240	38	19	17	12.274	1.056	0.519	0.463	0.321	0.496	0	0	1	0	0	0	c	c.113.1.1	A(10-261)
d1wdda1	325	311	28	27	19	14.364	0.609	0.613	0.518	0.654	0.575	0	0	1	1	0	0	c	c.1.14.1	A(151-475)
d1wdda2	140	126	24	20	13	6.240	0.727	0.614	0.491	0.568	0.562	0	0	1	0	0	0	d	d.58.9.1	A(11-150)
d1wdds_	122	101	20	17	15	5.100	0.625	0.554	0.475	0.700	0.529	0	0	1	0	0	0	d	d.73.1.1	S
d1wdfa_	91	79	48	11	6	3.168	2.824	0.695	0.538	0.540	0.623	0	0	1	1	0	1	h	h.3.3.1	A
d1wfea1	73	51	29	12	8	2.784	1.450	0.611	0.453	0.676	0.549	0	0	1	0	0	0	g	g.80.1.1	A(8-80)
d1whia_	122	116	24	16	13	4.992	0.828	0.603	0.525	0.701	0.574	0	0	1	1	0	0	b	b.39.1.1	A
d1whua1	91	74	22	14	10	3.080	0.917	0.611	0.548	0.492	0.589	0	0	1	1	0	0	a	a.4.9.1	A(274-364)
d1whza_	70	69	16	15	10	2.400	0.640	0.591	0.588	0.420	0.592	0	0	1	1	0	0	d	d.50.3.2	A
d1wina1	130	124	32	13	12	4.992	1.280	0.591	0.525	0.586	0.568	0	0	1	1	0	0	d	d.43.2.1	A(8-137)
d1wixa1	151	149	22	18	17	6.732	0.629	0.647	0.547	0.607	0.609	0	0	1	1	0	0	a	a.40.3.1	A(8-158)
d1wj0a_	58	57	18	13	9	2.106	0.818	0.649	0.570	0.609	0.619	0	0	1	1	0	0	g	g.72.1.1	A
d1wjta1	90	78	19	16	11	3.344	0.704	0.654	0.563	0.772	0.629	0	0	1	1	0	0	a	a.48.3.1	A(8-97)
d1wjxa_	112	106	21	17	13	4.641	0.700	0.599	0.528	0.547	0.572	0	0	1	1	0	0	b	b.111.1.1	A
d1wl6a1	176	151	24	20	16	7.680	0.667	0.591	0.506	0.690	0.564	0	0	1	1	0	0	c	c.55.2.1	A(1-176)
d1wlga_	293	276	56	21	15	17.640	1.556	0.437	0.376	0.317	0.415	0	1	0	0	0	0	b	b.152.1.1	A
d1wmib1	61	53	27	18	10	4.860	0.964	0.068	0.184	0.000	0.128	1	0	0	0	1	0	a	a.137.13.1	B(7-67)
d1wn2a_	118	115	23	16	13	4.784	0.793	0.636	0.541	0.640	0.601	0	0	1	1	0	0	c	c.131.1.0	A
d1wnaa_	127	125	18	18	14	4.536	0.562	0.595	0.571	0.553	0.591	0	0	1	1	0	0	d	d.319.1.1	A
d1wnya_	180	176	26	19	16	7.904	0.743	0.592	0.530	0.566	0.575	0	0	1	1	0	0	b	b.51.1.1	A
d1wola_	122	117	24	17	13	5.304	0.800	0.602	0.522	0.575	0.577	0	0	1	1	0	0	a	a.24.16.0	A
d1wpaa1	107	96	42	13	9	4.914	1.909	0.537	0.470	0.605	0.516	0	0	1	0	0	0	h	h.4.17.1	A(416-522)
d1wpba_	168	156	43	17	14	10.234	1.387	0.417	0.374	0.301	0.397	0	1	0	0	0	0	a	a.233.1.1	A
d1wqga_	184	168	43	19	12	9.804	1.387	0.484	0.411	0.699	0.463	0	1	0	0	0	0	d	d.67.3.1	A
d1wrva_	297	290	32	25	17	13.600	0.762	0.536	0.489	0.336	0.519	0	0	1	0	0	0	e	e.17.1.0	A
d1wtja_	332	306	29	26	23	17.342	0.592	0.508	0.419	0.403	0.468	0	0	1	0	0	0	c	c.122.1.0	A
d1wuba_	176	170	33	18	15	8.910	1.000	0.514	0.452	0.226	0.482	0	0	1	0	0	0	b	b.61.6.1	A
d1wvka1	77	75	36	14	9	4.536	1.565	0.330	0.311	0.164	0.318	0	1	0	0	0	0	g	g.82.1.1	A(10-86)
d1wvqa_	163	141	27	20	14	7.560	0.794	0.573	0.455	0.686	0.521	0	0	1	0	0	0	d	d.256.1.0	A
d1wy5a2	95	85	25	14	12	4.200	0.962	0.549	0.492	0.739	0.536	0	0	1	0	0	0	d	d.229.1.1	A(217-311)
d1wy6a_	159	154	36	16	12	6.912	1.286	0.608	0.542	0.632	0.584	0	0	1	1	0	0	a	a.118.20.1	A
d1x0ga_	102	97	21	18	11	4.158	0.724	0.580	0.527	0.428	0.561	0	0	1	1	0	0	b	b.124.1.0	A
d1x2ia1	68	61	19	12	10	2.280	0.864	0.596	0.561	0.360	0.579	0	0	1	1	0	0	a	a.60.2.5	A(2-69)
d1x3la_	436	410	45	28	19	23.940	0.957	0.503	0.415	0.545	0.465	0	0	1	0	0	0	c	c.118.1.0	A
d1x60a_	79	71	18	17	9	2.754	0.692	0.645	0.548	0.659	0.610	0	0	1	1	0	0	d	d.58.52.0	A
d1x6ia1	88	82	17	15	13	3.315	0.607	0.592	0.560	0.364	0.583	0	0	1	1	0	0	a	a.218.1.0	A(1-88)
d1x6za2	116	114	27	16	9	3.888	1.080	0.583	0.559	0.558	0.584	0	0	1	1	0	0	d	d.24.1.1	A(29-144)
d1x91a_	149	143	32	16	12	6.144	1.143	0.603	0.530	0.562	0.580	0	0	1	1	0	0	a	a.29.6.1	A
d1x9ba_	53	50	17	12	9	1.836	0.810	0.625	0.584	0.649	0.605	0	0	1	1	0	0	a	a.10.2.1	A
d1x9da_	452	444	30	29	24	20.880	0.566	0.566	0.528	0.369	0.556	0	0	1	1	0	0	a	a.102.2.1	A
d1x9la1	145	125	27	18	13	6.318	0.871	0.533	0.458	0.395	0.501	0	0	1	0	0	0	b	b.2.10.1	A(1-145)
d1x9na1	264	251	35	20	18	12.600	0.921	0.593	0.483	0.555	0.547	0	0	1	0	0	0	a	a.235.1.1	A(262-533)
d1x9za_	182	165	36	15	14	7.560	1.241	0.559	0.502	0.695	0.541	0	0	1	1	0	0	d	d.292.1.1	A
d1xaka_	68	65	21	13	10	2.730	0.913	0.591	0.540	0.723	0.584	0	0	1	1	0	0	b	b.1.24.1	A
d1xdna_	265	255	30	28	16	13.440	0.682	0.567	0.482	0.681	0.538	0	0	1	0	0	0	d	d.142.2.4	A
d1xeoa_	165	157	27	20	14	7.560	0.794	0.600	0.517	0.665	0.571	0	0	1	1	0	0	d	d.167.1.1	A
d1xg0a_	76	67	33	19	11	6.897	1.100	0.157	0.179	0.019	0.162	1	0	0	0	1	0	d	d.184.1.1	A
d1xkpb1	121	115	25	17	12	5.100	0.862	0.605	0.517	0.520	0.568	0	0	1	1	0	0	d	d.198.1.1	B(2-122)
d1xkra_	205	198	27	21	16	9.072	0.730	0.571	0.515	0.623	0.555	0	0	1	1	0	0	d	d.252.1.1	A
d1xksa_	374	359	34	29	20	19.720	0.694	0.516	0.457	0.248	0.494	0	0	1	0	0	0	b	b.69.14.1	A
d1xlya_	224	205	40	18	15	10.800	1.212	0.609	0.505	0.532	0.567	0	0	1	1	0	0	a	a.232.1.1	A
d1xm3a_	244	224	24	22	17	8.976	0.615	0.581	0.540	0.623	0.574	0	0	1	1	0	0	c	c.1.31.1	A
d1xn8a_	131	119	31	18	12	6.696	1.033	0.606	0.448	0.617	0.530	0	0	1	0	0	0	a	a.229.1.1	A
d1xo8a_	151	139	36	13	13	6.084	1.385	0.594	0.522	0.468	0.566	0	0	1	1	0	0	b	b.1.25.1	A
d1xoua_	72	68	38	15	6	3.420	1.810	0.486	0.422	0.358	0.461	0	1	0	0	0	0	a	a.231.1.1	A
d1xpna1	150	141	28	23	11	7.084	0.824	0.529	0.465	0.606	0.512	0	0	1	0	0	0	b	b.3.7.1	A(21-170)
d1xppa_	99	82	25	17	10	4.250	0.926	0.543	0.445	0.529	0.496	0	0	1	0	0	0	d	d.74.3.2	A
d1xqba_	186	154	31	19	14	8.246	0.939	0.557	0.460	0.553	0.522	0	0	1	0	0	0	e	e.56.1.1	A
d1xrsb2	52	50	19	10	7	1.330	1.118	0.565	0.609	0.395	0.602	0	0	1	1	1	0	d	d.230.4.1	B(33-84)
d1xsva_	106	98	36	13	10	4.680	1.565	0.610	0.520	0.624	0.576	0	0	1	1	0	0	a	a.4.13.3	A
d1xsza1	196	186	34	17	15	8.670	1.062	0.599	0.511	0.636	0.563	0	0	1	1	0	0	a	a.118.3.1	A(2-197)
d1xsza2	156	142	24	17	16	6.528	0.727	0.612	0.498	0.630	0.560	0	0	1	0	0	0	d	d.129.9.1	A(198-353)
d1xtaa2	57	55	24	10	9	2.160	1.263	0.464	0.445	0.621	0.462	0	1	0	0	0	0	g	g.19.1.0	A(165-221)
d1xu1r_	38	36	14	11	7	1.078	0.778	0.655	0.581	0.767	0.630	0	0	1	1	0	0	g	g.24.1.2	R
d1xu6a1	75	62	30	13	9	3.510	1.364	0.530	0.394	0.658	0.475	0	0	1	0	0	0	g	g.16.3.1	A(359-433)
d1xuba1	128	113	21	16	13	4.368	0.724	0.621	0.549	0.650	0.592	0	0	1	1	0	0	d	d.21.1.2	A(1-128)
d1xvsa_	124	118	29	15	12	5.220	1.074	0.579	0.524	0.554	0.561	0	0	1	1	0	0	b	b.1.23.1	A
d1xzpa1	173	161	36	17	12	7.344	1.241	0.590	0.521	0.526	0.567	0	0	1	1	0	0	a	a.24.25.1	A(118-211,372-450)
d1y02a1	44	43	15	13	10	1.950	0.652	0.586	0.519	0.478	0.570	0	0	1	1	0	0	a	a.140.2.1	A(71-114)
d1y0na1	69	65	20	14	10	2.800	0.833	0.598	0.513	0.575	0.567	0	0	1	1	0	0	d	d.291.1.1	A(1-76)
d1y0pa3	146	142	21	18	15	5.670	0.636	0.607	0.547	0.663	0.592	0	0	1	1	0	0	d	d.168.1.1	A(360-505)
d1y0ya1	78	76	18	16	11	3.168	0.667	0.592	0.535	0.544	0.572	0	0	1	1	0	0	b	b.49.3.1	A(73-163)
d1y6xa1	87	75	23	15	11	3.795	0.885	0.628	0.461	0.768	0.552	0	0	1	0	0	0	a	a.204.1.4	A(7-93)
d1y71a1	109	98	25	14	11	3.850	1.000	0.606	0.560	0.638	0.594	0	0	1	1	0	0	b	b.34.16.1	A(4-127)
d1y9ia_	159	151	29	16	14	6.496	0.967	0.610	0.545	0.815	0.595	0	0	1	1	0	0	a	a.195.1.1	A
d1yaro_	218	192	45	17	13	9.945	1.500	0.599	0.488	0.498	0.553	0	0	1	0	0	0	a	a.24.8.1	O
d1yb3a1	166	161	26	21	14	7.644	0.743	0.573	0.527	0.638	0.563	0	0	1	1	0	0	d	d.296.1.2	A(2-167)
d1ydua1	169	137	37	22	15	12.210	1.000	0.408	0.296	0.534	0.363	1	0	0	0	0	0	b	b.162.1.1	A(2-170)
d1yfqa1	341	314	29	27	20	15.660	0.617	0.556	0.506	0.476	0.544	0	0	1	1	0	0	b	b.69.4.2	A(1-341)
d1yfsa1	208	192	32	22	14	9.856	0.889	0.593	0.484	0.568	0.549	0	0	1	0	0	0	a	a.203.1.1	A(237-453)
d1yhnb1	65	62	35	16	6	3.360	1.591	0.414	0.395	0.207	0.409	0	1	0	0	0	0	h	h.1.34.1	B(244-308)
d1yiba1	61	53	40	9	6	2.160	2.667	0.472	0.451	0.347	0.465	0	1	0	0	0	1	a	a.245.1.1	A(190-250)
d1ykha_	95	80	48	14	8	5.376	2.182	0.272	0.325	0.063	0.304	1	0	0	0	1	1	a	a.252.1.2	A
d1ylxa1	100	97	24	15	12	4.320	0.889	0.616	0.538	0.627	0.590	0	0	1	1	0	0	d	d.82.5.1	A(1-100)
d1yoza1	111	111	26	17	11	4.862	0.929	0.594	0.528	0.511	0.571	0	0	1	1	0	0	a	a.253.1.1	A(11-124)
d1yt3a1	101	97	19	16	14	4.256	0.633	0.642	0.543	0.676	0.603	0	0	1	1	0	0	a	a.60.8.3	A(194-294)
d1yu0a1	166	151	47	16	11	8.272	1.741	0.499	0.419	0.529	0.468	0	1	0	0	0	0	b	b.163.1.1	A(5-170)
d1yu5x_	67	63	18	14	10	2.520	0.750	0.585	0.539	0.454	0.571	0	0	1	1	0	0	a	a.14.1.1	X
d1yvra1	346	315	40	30	16	19.200	0.870	0.452	0.407	0.223	0.427	0	1	0	0	0	0	a	a.118.25.1	A(5-363)
d1ywwa_	65	63	14	13	11	2.002	0.583	0.573	0.582	0.575	0.583	0	0	1	1	1	0	a	a.60.11.0	A
d1ywya1	74	70	19	15	10	2.850	0.760	0.628	0.534	0.597	0.579	0	0	1	1	0	0	b	b.55.2.1	A(23-96)
d1z0jb1	51	46	22	10	7	1.540	1.294	0.692	0.601	0.543	0.645	0	0	1	1	0	0	a	a.2.19.1	B(734-784)
d1z0pa1	73	62	28	14	8	3.136	1.273	0.667	0.501	0.679	0.594	0	0	1	1	0	0	a	a.2.18.1	A(1-77)
d1z0sa_	249	241	35	19	17	11.305	0.972	0.566	0.509	0.571	0.544	0	0	1	1	0	0	e	e.52.1.1	A
d1z0wa_	203	193	26	20	17	8.840	0.703	0.606	0.527	0.719	0.581	0	0	1	1	0	0	d	d.14.1.0	A
d1z1aa1	117	117	26	15	13	5.070	0.929	0.607	0.513	0.617	0.561	0	0	1	1	0	0	d	d.339.1.1	A(484-611)
d1z21a1	96	87	24	13	11	3.432	1.000	0.609	0.584	0.427	0.607	0	0	1	1	0	0	a	a.243.1.2	A(42-145)
d1z2ua1	147	142	28	17	12	5.712	0.966	0.611	0.558	0.481	0.590	0	0	1	1	0	0	d	d.20.1.1	A(1-147)
d1z3eb1	67	67	18	13	11	2.574	0.750	0.563	0.553	0.514	0.565	0	0	1	1	0	0	a	a.60.3.1	B(245-311)
d1z3xa2	148	144	23	18	16	6.624	0.676	0.567	0.531	0.488	0.561	0	0	1	1	0	0	a	a.261.1.1	A(88-235)
d1z67a1	127	107	19	16	14	4.256	0.633	0.574	0.518	0.463	0.549	0	0	1	1	0	0	a	a.259.1.1	A(3-131)
d1z8ga2	110	97	18	17	13	3.978	0.600	0.613	0.531	0.528	0.578	0	0	1	1	0	0	d	d.170.1.2	A(50-159)
d1z8ua_	90	89	29	12	11	3.828	1.261	0.616	0.545	0.548	0.587	0	0	1	1	0	0	a	a.7.11.1	A
d1zata2	122	112	30	13	11	4.290	1.250	0.615	0.545	0.561	0.582	0	0	1	1	0	0	d	d.335.1.1	A(217-338)
d1zava1	177	154	41	19	15	11.685	1.206	0.497	0.351	0.548	0.433	0	1	0	0	0	0	d	d.58.62.1	A(1-177)
d1zavu1	30	28	15	12	5	0.900	0.882	0.548	0.507	0.701	0.533	0	0	1	1	0	0	a	a.108.1.1	U(1-30)
d1zbpa1	264	249	33	21	20	13.860	0.805	0.576	0.457	0.609	0.523	0	0	1	0	0	0	e	e.61.1.1	A(2-265)
d1zd0a1	138	126	21	17	16	5.712	0.636	0.632	0.505	0.447	0.570	0	0	1	1	0	0	d	d.329.1.1	A(7-144)
d1zdya_	301	297	27	25	19	12.825	0.614	0.543	0.530	0.284	0.537	0	0	1	1	0	0	d	d.313.1.1	A
d1ze3d1	116	107	32	14	11	4.928	1.280	0.538	0.471	0.409	0.518	0	0	1	0	0	0	b	b.167.1.1	D(1-125)
d1zela2	209	192	27	19	17	8.721	0.750	0.619	0.523	0.629	0.579	0	0	1	1	0	0	d	d.377.1.1	A(83-294)
d1zgka1	288	275	24	24	21	12.096	0.533	0.545	0.533	0.223	0.547	0	0	1	1	0	0	b	b.68.11.1	A(322-609)
d1zhqa1	56	56	22	11	8	1.936	1.158	0.641	0.561	0.741	0.606	0	0	1	1	0	0	d	d.230.7.1	A(1-56)
d1zhxa2	433	405	36	28	24	24.192	0.692	0.560	0.455	0.359	0.516	0	0	1	0	0	0	d	d.338.1.1	A(2-434)
d1zjca1	413	400	32	28	23	20.608	0.627	0.507	0.484	0.287	0.504	0	0	1	0	0	0	e	e.60.1.1	A(3-415)
d1zkea1	79	72	27	15	8	3.240	1.174	0.565	0.505	0.495	0.540	0	0	1	1	0	0	a	a.30.6.1	A(1-79)
d1zl0a1	138	130	22	16	15	5.280	0.710	0.588	0.541	0.557	0.578	0	0	1	1	0	0	c	c.8.10.1	A(170-307)
d1zmec1	36	32	12	10	8	0.960	0.667	0.689	0.590	0.853	0.648	0	0	1	1	0	0	g	g.38.1.1	C(31-66)
d1zn6a1	210	193	25	21	18	9.450	0.641	0.605	0.507	0.566	0.567	0	0	1	1	0	0	d	d.303.1.1	A(2-219)
d1zpsa1	124	112	23	16	14	5.152	0.767	0.595	0.503	0.520	0.557	0	0	1	1	0	0	b	b.168.1.1	A(8-131)
d1zq1a1	74	63	18	13	10	2.340	0.783	0.518	0.506	0.476	0.512	0	0	1	1	0	0	b	b.38.3.1	A(2-75)
d1zroa1	273	247	37	22	18	14.652	0.925	0.557	0.447	0.617	0.514	0	0	1	0	0	0	a	a.264.1.1	A(8-282)
d1zt2b1	207	191	35	18	15	9.450	1.061	0.587	0.499	0.605	0.553	0	0	1	0	0	0	a	a.262.1.1	B(3-209)
d1zt5a_	80	73	23	19	9	3.933	0.821	0.632	0.475	0.673	0.561	0	0	1	0	0	0	g	g.28.1.1	A
d1zyma1	123	109	29	15	11	4.785	1.115	0.562	0.503	0.379	0.537	0	0	1	1	0	0	a	a.60.10.1	A(22-144)
d1zzka2	79	76	22	15	12	3.960	0.815	0.607	0.481	0.473	0.554	0	0	1	0	0	0	d	d.51.1.0	A(11-89)
d2a1va1	131	130	23	18	15	6.210	0.697	0.601	0.498	0.538	0.558	0	0	1	0	0	0	d	d.198.3.1	A(4-134)
d2a26a1	47	44	22	10	6	1.320	1.375	0.631	0.598	0.402	0.624	0	0	1	1	0	0	a	a.2.16.1	A(1-47)
d2a2la1	142	123	21	20	12	5.040	0.656	0.659	0.542	0.681	0.610	0	0	1	1	0	0	d	d.110.9.1	A(4-145)
d2a73a6	66	57	36	9	9	2.916	2.000	0.463	0.366	0.300	0.413	0	1	0	0	0	1	g	g.94.1.1	A(578-643)
d2a73b6	113	102	29	13	12	4.524	1.160	0.548	0.508	0.498	0.551	0	0	1	1	0	0	b	b.23.4.1	B(912-962,1269-1330)
d2a90a1	80	73	21	14	12	3.528	0.808	0.588	0.480	0.586	0.547	0	0	1	0	0	0	d	d.289.1.1	A(43-131)
d2a9da2	246	227	28	24	18	12.096	0.667	0.585	0.479	0.576	0.536	0	0	1	0	0	0	d	d.176.1.1	A(95-343)
d2a9sa1	167	159	25	18	13	5.850	0.806	0.616	0.562	0.596	0.594	0	0	1	1	0	0	c	c.51.5.1	A(1-167)
d2a9ua1	134	101	38	15	13	7.410	1.357	0.474	0.354	0.701	0.425	0	1	0	0	0	0	a	a.118.23.1	A(6-139)
d2absa1	340	331	31	25	21	16.275	0.674	0.514	0.476	0.438	0.508	0	0	1	0	0	0	c	c.72.1.1	A(10-359)
d2ad6b_	69	61	42	16	8	5.376	1.750	0.222	0.229	0.125	0.230	1	0	0	0	1	0	a	a.137.2.1	B
d2aefa2	89	79	20	13	12	3.120	0.800	0.591	0.515	0.480	0.555	0	0	1	1	0	0	d	d.286.1.1	A(245-336)
d2aexa_	336	320	36	23	19	15.732	0.857	0.578	0.507	0.678	0.551	0	0	1	1	0	0	d	d.248.1.0	A
d2ag4a2	162	162	26	21	16	8.736	0.703	0.266	0.385	0.039	0.334	1	0	0	0	1	0	b	b.95.1.1	A(3-164)
d2agyd_	109	104	21	15	11	3.465	0.808	0.667	0.589	0.687	0.630	0	0	1	1	0	0	g	g.21.1.0	D
d2ahma1	73	68	21	15	10	3.150	0.840	0.549	0.464	0.503	0.510	0	0	1	0	0	0	a	a.8.9.1	A(6-78)
d2aiba_	98	98	20	15	12	3.600	0.741	0.437	0.512	0.060	0.472	0	1	0	0	1	0	a	a.134.1.1	A
d2aj7a1	148	140	25	21	14	7.350	0.714	0.607	0.478	0.520	0.550	0	0	1	0	0	0	b	b.158.1.1	A(1-148)
d2ajaa1	342	300	51	22	15	16.830	1.378	0.563	0.457	0.648	0.523	0	0	1	0	0	0	a	a.118.24.1	A(3-348)
d2ap3a1	181	175	45	14	12	7.560	1.731	0.510	0.481	0.594	0.504	0	0	1	0	0	0	a	a.24.27.1	A(12-196)
d2apla1	149	139	34	17	12	6.936	1.172	0.592	0.480	0.658	0.546	0	0	1	0	0	0	a	a.258.1.1	A(2-150)
d2apob_	55	53	25	17	8	3.400	1.000	0.218	0.286	0.008	0.249	1	0	0	0	1	0	g	g.41.16.1	B
d2arca_	161	156	23	19	18	7.866	0.622	0.607	0.526	0.683	0.585	0	0	1	1	0	0	b	b.82.4.1	A
d2asba2	79	76	19	13	10	2.470	0.826	0.599	0.583	0.449	0.600	0	0	1	1	0	0	d	d.52.3.1	A(184-262)
d2aska_	101	91	34	14	10	4.760	1.417	0.340	0.369	0.128	0.351	0	1	0	0	1	0	g	g.17.1.0	A
d2au5a1	128	112	23	19	13	5.681	0.719	0.601	0.479	0.660	0.549	0	0	1	0	0	0	a	a.244.1.1	A(1-132)
d2au7a_	175	170	23	20	17	7.820	0.622	0.577	0.516	0.683	0.556	0	0	1	1	0	0	b	b.40.5.1	A
d2auwa2	84	79	20	14	12	3.360	0.769	0.609	0.558	0.402	0.594	0	0	1	1	0	0	d	d.331.1.1	A(4-87)
d2avue1	156	142	29	16	15	6.960	0.935	0.617	0.501	0.640	0.568	0	0	1	1	0	0	e	e.64.1.1	E(5-160)
d2axwa1	121	112	25	16	13	5.200	0.862	0.629	0.501	0.460	0.567	0	0	1	1	0	0	b	b.2.3.2	A(1-121)
d2ayda_	76	74	21	14	11	3.234	0.840	0.586	0.503	0.592	0.554	0	0	1	1	0	0	g	g.79.1.0	A
d2az0a1	70	63	35	11	5	1.925	2.188	0.614	0.597	0.300	0.609	0	0	1	1	0	1	a	a.30.8.1	A(2-71)
d2azea1	148	108	31	23	12	8.556	0.886	0.490	0.338	0.504	0.425	0	1	0	0	0	0	e	e.63.1.1	A(199-346)
d2b0aa1	185	170	23	20	18	8.280	0.605	0.615	0.523	0.692	0.584	0	0	1	1	0	0	c	c.8.8.1	A(1-185)
d2b1ea_	532	474	92	18	17	28.152	2.629	0.564	0.455	0.597	0.519	0	0	1	0	0	1	a	a.118.17.2	A
d2b1ya1	101	87	39	18	13	9.126	1.258	0.277	0.232	0.186	0.252	1	0	0	0	0	0	b	b.156.1.1	A(4-104)
d2b2ha_	391	372	32	26	21	17.472	0.681	0.607	0.523	0.587	0.582	0	0	1	1	0	0	f	f.44.1.0	A
d2b3wa1	160	156	26	19	16	7.904	0.743	0.537	0.493	0.443	0.526	0	0	1	0	0	0	d	d.336.1.1	A(1-160)
d2b3ya1	259	246	29	23	17	11.339	0.725	0.569	0.505	0.640	0.549	0	0	1	1	0	0	c	c.8.2.1	A(631-889)
d2b3ya2	629	580	44	28	25	30.800	0.830	0.596	0.489	0.664	0.554	0	0	1	0	0	0	c	c.83.1.1	A(2-630)
d2b5la3	97	86	24	16	11	4.224	0.889	0.540	0.457	0.741	0.513	0	0	1	0	0	0	a	a.297.1.1	A(1044-1140)
d2b5lc_	174	159	25	17	16	6.800	0.758	0.600	0.488	0.719	0.553	0	0	1	0	0	0	d	d.384.1.1	C
d2b7cb_	90	89	25	13	11	3.575	1.042	0.608	0.555	0.365	0.586	0	0	1	1	0	0	d	d.58.12.1	B
d2b97a_	70	69	14	13	11	2.002	0.583	0.689	0.584	0.703	0.638	0	0	1	1	0	0	b	b.138.1.1	A
d2b9da1	50	46	18	12	7	1.512	0.947	0.525	0.518	0.270	0.526	0	0	1	1	0	0	g	g.91.1.1	A(44-93)
d2ba2a1	81	62	61	9	5	2.745	4.357	0.466	0.422	0.325	0.450	0	1	0	0	0	1	h	h.1.30.1	A(5-85)
d2baia1	32	30	22	7	7	1.078	1.571	0.583	0.523	0.522	0.571	0	0	1	1	0	0	g	g.87.1.1	A(1-32)
d2basa1	257	244	32	22	19	13.376	0.780	0.527	0.465	0.578	0.506	0	0	1	0	0	0	c	c.1.33.1	A(2-262)
d2baya_	56	53	15	12	10	1.800	0.682	0.638	0.598	0.799	0.626	0	0	1	1	0	0	g	g.44.1.2	A
d2bbha1	223	193	30	21	17	10.710	0.789	0.564	0.462	0.568	0.523	0	0	1	0	0	0	d	d.328.1.1	A(13-244)
d2bjqa1	170	159	22	20	15	6.600	0.629	0.634	0.541	0.560	0.592	0	0	1	1	0	0	b	b.169.1.1	A(175-344)
d2bkya_	89	79	24	13	10	3.120	1.043	0.605	0.531	0.625	0.570	0	0	1	1	0	0	d	d.68.6.1	A
d2bl8a1	93	89	20	17	11	3.740	0.714	0.566	0.511	0.382	0.545	0	0	1	1	0	0	a	a.29.8.2	A(4-103)
d2blna1	101	97	19	15	11	3.135	0.731	0.618	0.588	0.457	0.607	0	0	1	1	0	0	b	b.46.1.1	A(204-304)
d2blna2	197	193	28	19	18	9.576	0.757	0.588	0.504	0.606	0.565	0	0	1	1	0	0	c	c.65.1.1	A(1-203)
d2bnka_	64	50	20	11	9	1.980	1.000	0.611	0.551	0.634	0.591	0	0	1	1	0	0	a	a.251.1.1	A
d2bogx_	280	278	30	22	20	13.200	0.714	0.572	0.500	0.631	0.552	0	0	1	1	0	0	c	c.6.1.1	X
d2brfa1	100	95	20	14	11	3.080	0.800	0.577	0.584	0.352	0.585	0	0	1	1	1	0	b	b.26.1.2	A(8-108)
d2bs2a1	198	167	46	19	14	12.236	1.394	0.301	0.317	0.069	0.308	0	1	0	0	1	0	a	a.7.3.1	A(458-655)
d2bs2b1	134	114	22	16	14	4.928	0.733	0.571	0.523	0.726	0.561	0	0	1	1	0	0	a	a.1.2.1	B(107-240)
d2bs2c_	255	201	37	21	15	11.655	1.028	0.469	0.444	0.381	0.464	0	1	0	0	0	0	f	f.21.2.1	C
d2btia_	59	52	26	16	7	2.912	1.130	0.377	0.354	0.125	0.370	0	1	0	0	0	0	b	b.151.1.1	A
d2btva_	845	746	82	34	17	47.396	1.608	0.564	0.439	0.622	0.511	0	0	1	0	0	0	e	e.28.1.1	A
d2bvca1	101	100	24	16	13	4.992	0.828	0.615	0.483	0.588	0.557	0	0	1	0	0	0	d	d.15.9.0	A(4-104)
d2bw3a1	84	75	25	16	15	6.000	0.806	0.264	0.259	0.408	0.272	1	0	0	0	0	0	a	a.270.1.1	A(79-162)
d2bz1a_	174	172	28	18	17	8.568	0.800	0.535	0.465	0.643	0.510	0	0	1	0	0	0	c	c.144.1.1	A
d2bzva1	147	146	25	18	14	6.300	0.781	0.609	0.527	0.559	0.575	0	0	1	1	0	0	b	b.21.1.0	A(229-387)
d2c0ga1	106	103	23	19	11	4.807	0.767	0.627	0.538	0.566	0.602	0	0	1	1	0	0	a	a.71.1.0	A(1146-1251)
d2c0sa1	57	55	26	13	7	2.366	1.300	0.660	0.537	0.605	0.608	0	0	1	1	0	0	a	a.30.7.1	A(1-57)
d2c1ia2	187	179	41	17	13	9.061	1.367	0.549	0.466	0.635	0.515	0	0	1	0	0	0	d	d.341.1.1	A(46-267)
d2c2ua_	178	166	34	16	12	6.528	1.214	0.603	0.562	0.502	0.593	0	0	1	1	0	0	a	a.25.1.0	A
d2c42a4	253	217	32	22	19	13.376	0.780	0.579	0.428	0.634	0.510	0	0	1	0	0	0	c	c.64.1.1	A(416-668)
d2c60a1	80	79	18	14	12	3.024	0.692	0.601	0.548	0.551	0.576	0	0	1	1	0	0	d	d.15.2.2	A(43-122)
d2c61a2	107	93	28	15	10	4.200	1.120	0.617	0.532	0.597	0.585	0	0	1	1	0	0	a	a.69.1.0	A(351-457)
d2c6qa1	327	309	29	23	22	14.674	0.644	0.568	0.488	0.657	0.538	0	0	1	0	0	0	c	c.1.5.0	A(10-336)
d2c9wa1	50	46	20	11	8	1.760	1.053	0.577	0.505	0.570	0.549	0	0	1	1	0	0	a	a.271.1.1	A(149-198)
d2ca5a1	59	55	34	12	5	2.040	2.000	0.630	0.508	0.865	0.584	0	0	1	1	0	1	a	a.2.20.1	A(20-78)
d2cara1	194	192	32	19	15	9.120	0.941	0.536	0.497	0.572	0.533	0	0	1	0	0	0	c	c.51.4.1	A(1-194)
d2cb8a_	86	84	22	16	10	3.520	0.846	0.606	0.535	0.792	0.581	0	0	1	1	0	0	a	a.11.1.1	A
d2cboa_	115	108	24	16	10	3.840	0.923	0.572	0.537	0.652	0.569	0	0	1	1	0	0	b	b.1.7.1	A
d2cc6a_	64	60	24	10	8	1.920	1.333	0.664	0.589	0.588	0.625	0	0	1	1	0	0	d	d.230.2.1	A
d2ccqa1	99	98	20	15	12	3.600	0.741	0.619	0.576	0.478	0.604	0	0	1	1	0	0	d	d.314.1.1	A(11-109)
d2ccva1	99	93	28	13	10	3.640	1.217	0.612	0.564	0.647	0.602	0	0	1	1	0	0	b	b.154.1.1	A(1-99)
d2cg7a1	43	41	17	10	9	1.530	0.895	0.669	0.550	0.749	0.608	0	0	1	1	0	0	g	g.27.1.1	A(109-151)
d2chha_	113	105	23	14	12	3.864	0.885	0.604	0.541	0.436	0.578	0	0	1	1	0	0	b	b.115.1.1	A
d2choa1	154	141	28	18	14	7.056	0.875	0.607	0.489	0.573	0.551	0	0	1	0	0	0	a	a.246.1.1	A(437-590)
d2ci1a_	275	273	25	25	21	13.125	0.543	0.570	0.513	0.486	0.551	0	0	1	1	0	0	d	d.126.1.0	A
d2ciwa1	120	103	25	16	13	5.200	0.862	0.564	0.461	0.559	0.520	0	0	1	0	0	0	a	a.39.3.1	A(0-119)
d2ckaa1	58	52	18	13	9	2.106	0.818	0.627	0.522	0.673	0.579	0	0	1	1	0	0	d	d.76.2.1	A(2028-2085)
d2clya1	105	86	72	15	6	6.480	3.429	0.183	0.251	0.015	0.218	1	0	0	0	1	1	f	f.52.1.1	A(79-183)
d2clyb1	120	106	53	13	12	8.268	2.120	0.110	0.229	0.001	0.170	1	0	0	0	1	1	f	f.53.1.1	B(4-123)
d2clyc_	66	53	40	14	10	5.600	1.667	0.170	0.190	0.023	0.180	1	0	0	0	1	0	f	f.45.1.1	C
d2cmyb1	21	20	10	8	5	0.400	0.769	0.768	0.653	0.626	0.711	0	0	1	1	0	0	g	g.2.4.1	B(7-29)
d2cnqa_	301	295	31	25	20	15.500	0.689	0.556	0.488	0.519	0.535	0	0	1	0	0	0	d	d.143.1.1	A
d2cona1	66	50	24	18	9	3.888	0.889	0.432	0.324	0.700	0.386	0	1	0	0	0	0	g	g.41.15.1	A(8-73)
d2cr9a1	126	117	28	16	13	5.824	0.966	0.627	0.479	0.707	0.559	0	0	1	0	0	0	d	d.297.1.1	A(8-133)
d2crua1	105	95	32	15	14	6.720	1.103	0.437	0.345	0.443	0.402	0	1	0	0	0	0	a	a.5.6.1	A(8-112)
d2cs7a1	55	53	16	14	10	2.240	0.667	0.628	0.525	0.422	0.582	0	0	1	1	0	0	d	d.9.2.1	A(0-54)
d2csba5	291	283	30	26	20	15.600	0.652	0.597	0.486	0.598	0.548	0	0	1	0	0	0	a	a.267.1.1	A(3-293)
d2cu2a1	67	62	21	15	9	2.835	0.875	0.520	0.451	0.715	0.504	0	0	1	0	0	0	b	b.81.4.1	A(269-335)
d2cvea2	67	67	21	14	11	3.234	0.840	0.622	0.511	0.606	0.573	0	0	1	1	0	0	d	d.58.11.2	A(125-191)
d2cwya1	94	94	20	14	13	3.640	0.741	0.599	0.567	0.702	0.597	0	0	1	1	0	0	a	a.246.2.1	A(1-94)
d2cx1a2	90	87	23	17	12	4.692	0.793	0.520	0.444	0.680	0.491	0	0	1	0	0	0	d	d.17.6.4	A(1-90)
d2cxya_	114	103	20	19	12	4.560	0.645	0.621	0.535	0.661	0.588	0	0	1	1	0	0	a	a.4.3.1	A
d2cyja1	118	118	20	18	13	4.680	0.645	0.593	0.567	0.687	0.586	0	0	1	1	0	0	c	c.103.1.1	A(1-118)
d2cz9a2	168	157	31	20	13	8.060	0.939	0.565	0.477	0.572	0.531	0	0	1	0	0	0	d	d.58.26.0	A(179-350)
d2czra1	218	195	38	21	13	10.374	1.118	0.582	0.478	0.701	0.537	0	0	1	0	0	0	c	c.52.4.1	A(1-218)
d2czvc1	118	107	21	19	11	4.389	0.700	0.605	0.559	0.628	0.590	0	0	1	1	0	0	d	d.58.59.1	C(3-120)
d2d00a1	104	100	45	16	11	7.920	1.667	0.341	0.275	0.453	0.324	1	0	0	0	0	0	c	c.149.1.1	A(6-109)
d2d0oa1	162	159	25	19	16	7.600	0.714	0.615	0.504	0.523	0.570	0	0	1	1	0	0	c	c.8.6.1	A(93-254)
d2d1sa_	539	519	40	27	26	28.080	0.755	0.503	0.458	0.499	0.493	0	0	1	0	0	0	e	e.23.1.1	A
d2d28c1	144	133	28	15	14	5.880	0.966	0.561	0.510	0.712	0.550	0	0	1	1	0	0	d	d.52.10.1	C(1-149)
d2d74b1	101	90	24	16	11	4.224	0.889	0.505	0.480	0.632	0.503	0	0	1	0	0	0	d	d.241.1.0	B(3-103)
d2d74b2	36	35	16	8	7	0.896	1.067	0.680	0.629	0.934	0.671	0	0	1	1	0	0	g	g.59.1.0	B(104-139)
d2d7cc1	42	36	31	8	5	1.240	2.385	0.671	0.546	0.675	0.616	0	0	1	1	0	1	h	h.1.31.1	C(715-756)
d2d8da1	80	77	32	15	9	4.320	1.333	0.358	0.369	0.341	0.372	0	1	0	0	1	0	a	a.130.1.1	A(3-82)
d2d9ba1	96	79	21	13	12	3.276	0.840	0.606	0.526	0.631	0.570	0	0	1	1	0	0	d	d.288.1.0	A(8-103)
d2d9ra1	85	82	19	15	11	3.135	0.731	0.604	0.546	0.560	0.581	0	0	1	1	0	0	b	b.129.2.1	A(20-104)
d2db7a1	55	49	27	11	5	1.485	1.688	0.623	0.564	0.587	0.599	0	0	1	1	0	0	a	a.273.1.1	A(3-57)
d2dbsa1	80	77	19	17	10	3.230	0.704	0.566	0.500	0.599	0.552	0	0	1	1	0	0	d	d.374.1.1	A(7-86)
d2diia1	48	38	15	11	8	1.320	0.789	0.620	0.569	0.552	0.604	0	0	1	1	0	0	a	a.240.1.1	A(8-55)
d2dk4a1	63	58	19	14	10	2.660	0.792	0.574	0.485	0.484	0.540	0	0	1	0	0	0	a	a.140.6.1	A(8-70)
d2dkja_	402	382	35	28	19	18.620	0.745	0.551	0.491	0.557	0.532	0	0	1	0	0	0	c	c.67.1.4	A
d2dlba1	70	59	26	12	10	3.120	1.182	0.317	0.364	0.084	0.346	0	1	0	0	1	0	b	b.174.1.1	A(2002-2071)
d2dm9a1	118	106	23	17	13	5.083	0.767	0.584	0.489	0.620	0.546	0	0	1	0	0	0	d	d.81.4.1	A(81-198)
d2dpla2	119	112	25	17	13	5.525	0.833	0.619	0.495	0.558	0.568	0	0	1	0	0	0	d	d.52.2.0	A(190-308)
d2dsma1	64	50	27	14	11	4.158	1.080	0.436	0.306	0.748	0.386	0	1	0	0	0	0	d	d.372.1.1	A(1-64)
d2dsya1	80	76	24	13	11	3.432	1.000	0.641	0.530	0.546	0.591	0	0	1	1	0	0	d	d.304.1.2	A(3-82)
d2dt6a1	63	62	17	13	10	2.210	0.739	0.655	0.573	0.763	0.621	0	0	1	1	0	0	a	a.217.1.1	A(48-110)
d2dwka_	162	153	25	21	14	7.350	0.714	0.602	0.529	0.550	0.579	0	0	1	1	0	0	a	a.256.1.1	A
d2dxua2	43	42	15	12	10	1.800	0.682	0.607	0.515	0.388	0.570	0	0	1	1	0	0	b	b.34.1.1	A(189-235)
d2e0aa1	165	150	29	16	15	6.960	0.935	0.596	0.531	0.425	0.570	0	0	1	1	0	0	a	a.29.5.0	A(20-187)
d2e3ha1	71	69	17	14	10	2.380	0.708	0.637	0.589	0.713	0.621	0	0	1	1	0	0	b	b.34.10.1	A(212-282)
d2e5fa_	325	319	32	23	20	14.720	0.744	0.609	0.521	0.537	0.569	0	0	1	1	0	0	c	c.80.1.0	A
d2e7sa1	114	96	84	9	6	4.536	5.600	0.463	0.424	0.370	0.449	0	1	0	0	0	1	h	h.1.33.1	A(31-144)
d2ebfx1	300	276	43	26	15	16.770	1.049	0.521	0.424	0.645	0.485	0	0	1	0	0	0	a	a.296.1.1	X(575-874)
d2ebfx2	219	204	26	23	15	8.970	0.684	0.600	0.528	0.523	0.574	0	0	1	1	0	0	c	c.150.1.2	X(875-1093)
d2ecsa_	60	53	16	11	10	1.760	0.762	0.610	0.555	0.674	0.580	0	0	1	1	0	0	a	a.35.1.2	A
d2ed6a1	170	151	30	18	15	8.100	0.909	0.612	0.482	0.512	0.554	0	0	1	0	0	0	b	b.170.1.1	A(32-201)
d2egha1	97	82	24	16	10	3.840	0.923	0.640	0.500	0.505	0.576	0	0	1	1	0	0	a	a.69.3.1	A(301-397)
d2enda_	137	124	27	17	11	5.049	0.964	0.610	0.557	0.584	0.588	0	0	1	1	0	0	a	a.18.1.1	A
d2eq9c_	40	39	14	10	8	1.120	0.778	0.630	0.598	0.648	0.617	0	0	1	1	0	0	a	a.9.1.0	C
d2es4d1	270	242	46	31	24	34.224	0.836	0.106	0.159	0.001	0.135	1	0	0	0	1	0	a	a.137.15.1	D(53-332)
d2es9a1	97	93	17	16	13	3.536	0.586	0.593	0.550	0.427	0.580	0	0	1	1	0	0	a	a.247.1.1	A(11-107)
d2etda1	139	138	38	14	11	5.852	1.520	0.575	0.528	0.581	0.565	0	0	1	1	0	0	a	a.29.9.1	A(35-183)
d2euca1	108	105	20	16	13	4.160	0.690	0.586	0.547	0.742	0.583	0	0	1	1	0	0	a	a.249.1.1	A(1-113)
d2ew0a1	175	164	28	17	16	7.616	0.848	0.606	0.522	0.520	0.576	0	0	1	1	0	0	d	d.310.1.1	A(5-179)
d2ewka_	107	104	22	18	15	5.940	0.667	0.414	0.406	0.405	0.417	0	1	0	0	0	0	a	a.138.1.1	A
d2ex3b1	162	140	38	21	12	9.576	1.152	0.362	0.347	0.095	0.355	0	1	0	0	0	0	a	a.263.1.1	B(71-259)
d2exda1	72	59	19	11	10	2.090	0.905	0.601	0.562	0.470	0.598	0	0	1	1	0	0	b	b.40.12.1	A(72-143)
d2exna1	120	111	20	17	13	4.420	0.667	0.611	0.535	0.499	0.585	0	0	1	1	0	0	b	b.165.1.1	A(1-120)
d2eyqa1	80	77	22	16	11	3.872	0.815	0.561	0.439	0.495	0.510	0	0	1	0	0	0	b	b.34.18.1	A(466-545)
d2eyqa6	158	147	29	17	14	6.902	0.935	0.564	0.495	0.564	0.536	0	0	1	0	0	0	d	d.315.1.1	A(990-1147)
d2f01a_	121	107	26	14	12	4.368	1.000	0.624	0.511	0.724	0.577	0	0	1	1	0	0	b	b.61.1.1	A
d2f09a1	82	80	17	17	12	3.468	0.586	0.612	0.522	0.665	0.574	0	0	1	1	0	0	b	b.61.8.1	A(1-82)
d2f22a1	141	130	25	17	14	5.950	0.806	0.627	0.531	0.499	0.576	0	0	1	1	0	0	a	a.213.1.2	A(1-141)
d2f23a1	75	72	36	10	9	3.240	1.895	0.628	0.519	0.520	0.586	0	0	1	1	0	0	a	a.2.1.1	A(3-77)
d2f2ba_	245	234	30	20	16	9.600	0.833	0.573	0.527	0.448	0.560	0	0	1	1	0	0	f	f.19.1.0	A
d2f4ia1	176	171	27	23	13	8.073	0.750	0.588	0.513	0.640	0.561	0	0	1	1	0	0	b	b.40.11.1	A(39-214)
d2f4mb2	60	60	14	14	12	2.352	0.538	0.558	0.522	0.476	0.542	0	0	1	1	0	0	a	a.189.1.1	B(273-332)
d2f5ga_	130	125	37	14	12	6.216	1.423	0.602	0.506	0.647	0.565	0	0	1	1	0	0	d	d.58.57.1	A
d2f5tx1	92	88	20	15	12	3.600	0.741	0.634	0.558	0.576	0.605	0	0	1	1	0	0	b	b.38.5.1	X(247-338)
d2f69a1	78	73	19	15	11	3.135	0.731	0.633	0.522	0.699	0.588	0	0	1	1	0	0	b	b.76.2.1	A(116-193)
d2f69a2	166	160	22	21	16	7.392	0.595	0.554	0.494	0.412	0.526	0	0	1	0	0	0	b	b.85.7.1	A(194-364)
d2f6ma2	64	53	24	12	7	2.016	1.263	0.675	0.567	0.469	0.625	0	0	1	1	0	0	a	a.2.17.1	A(322-385)
d2f9ha1	121	114	18	17	15	4.590	0.562	0.584	0.552	0.555	0.578	0	0	1	1	0	0	b	b.161.1.1	A(3-123)
d2fb5a1	201	172	29	19	17	9.367	0.806	0.540	0.438	0.545	0.495	0	0	1	0	0	0	d	d.320.1.1	A(5-205)
d2fcja1	114	110	21	17	12	4.284	0.724	0.572	0.561	0.485	0.580	0	0	1	1	0	0	c	c.136.1.1	A(1-114)
d2fcla1	156	152	23	22	16	8.096	0.605	0.539	0.490	0.577	0.527	0	0	1	0	0	0	d	d.218.1.11	A(2-157)
d2fcoa_	154	143	23	18	15	6.210	0.697	0.613	0.549	0.666	0.597	0	0	1	1	0	0	c	c.52.1.28	A
d2fcwa1	105	100	40	11	10	4.400	1.905	0.612	0.512	0.667	0.572	0	0	1	1	0	0	a	a.13.1.1	A(216-320)
d2fcwb1	39	35	15	10	7	1.050	0.882	0.703	0.607	0.545	0.665	0	0	1	1	0	0	g	g.12.1.1	B(86-124)
d2fdoa1	92	85	27	18	12	5.832	0.900	0.259	0.306	0.506	0.288	1	0	0	0	1	0	d	d.337.1.1	A(1-92)
d2fefa1	124	118	30	14	12	5.040	1.154	0.624	0.536	0.510	0.588	0	0	1	1	0	0	a	a.29.11.1	A(6-129)
d2fefa2	157	147	22	21	16	7.392	0.595	0.614	0.510	0.608	0.579	0	0	1	1	0	0	a	a.254.1.1	A(135-293)
d2ffga1	78	71	19	15	12	3.420	0.704	0.632	0.527	0.561	0.582	0	0	1	1	0	0	d	d.317.1.1	A(2-79)
d2ffma_	83	80	19	14	12	3.192	0.731	0.585	0.531	0.536	0.571	0	0	1	1	0	0	d	d.267.1.1	A
d2ffta1	83	72	52	25	13	16.900	1.368	0.032	0.065	0.000	0.045	1	0	0	0	1	0	g	g.88.1.1	A(2-84)
d2fgga1	84	69	30	11	8	2.640	1.579	0.648	0.519	0.602	0.587	0	0	1	1	0	0	d	d.50.5.1	A(4-87)
d2fgra_	332	326	32	28	21	18.816	0.653	0.413	0.395	0.289	0.414	0	1	0	0	0	0	f	f.4.3.1	A
d2fhza1	83	80	23	13	11	3.289	0.958	0.616	0.554	0.608	0.598	0	0	1	1	0	0	d	d.311.1.1	A(27-109)
d2fhzb_	93	88	20	16	12	3.840	0.714	0.508	0.481	0.648	0.506	0	0	1	0	0	0	d	d.243.1.2	B
d2fi0a1	79	74	16	12	11	2.112	0.696	0.530	0.594	0.543	0.572	0	0	1	1	1	0	a	a.248.1.1	A(3-81)
d2fiya1	285	277	30	25	18	13.500	0.698	0.584	0.497	0.538	0.550	0	0	1	0	0	0	e	e.59.1.1	A(19-308)
d2fj8a1	59	54	19	12	9	2.052	0.905	0.591	0.534	0.580	0.568	0	0	1	1	0	0	g	g.3.13.1	A(65-123)
d2fk4a1	65	59	16	13	11	2.288	0.667	0.619	0.558	0.597	0.590	0	0	1	1	0	0	g	g.90.1.1	A(3-67)
d2fm9a1	201	186	25	24	14	8.400	0.658	0.575	0.507	0.714	0.551	0	0	1	1	0	0	a	a.257.1.1	A(49-263)
d2fmaa1	57	55	21	9	9	1.701	1.167	0.675	0.636	0.561	0.667	0	0	1	1	0	0	d	d.230.3.1	A(133-189)
d2fmpa1	82	80	21	14	10	2.940	0.875	0.597	0.541	0.585	0.577	0	0	1	1	0	0	a	a.60.6.1	A(10-91)
d2fmpa2	57	56	17	12	11	2.244	0.739	0.600	0.551	0.420	0.577	0	0	1	1	0	0	a	a.60.12.1	A(92-148)
d2fn3a1	160	155	22	19	16	6.688	0.629	0.586	0.515	0.686	0.560	0	0	1	1	0	0	c	c.31.1.3	A(182-341)
d2fn3a2	180	174	22	21	16	7.392	0.595	0.587	0.548	0.610	0.585	0	0	1	1	0	0	c	c.36.1.0	A(2-181)
d2fo1d1	63	53	48	13	5	3.120	2.667	0.363	0.330	0.226	0.347	0	1	0	0	0	1	a	a.137.14.1	D(52-114)
d2fpna1	205	182	61	16	14	13.664	2.033	0.435	0.344	0.554	0.402	0	1	0	0	0	1	d	d.129.10.1	A(1-214)
d2fqma1	65	59	20	18	11	3.960	0.690	0.297	0.294	0.215	0.299	1	0	0	0	0	0	d	d.378.1.1	A(107-171)
d2fsya1	280	225	41	28	13	14.924	1.000	0.557	0.397	0.514	0.481	0	0	1	0	0	0	d	d.183.1.1	A(104-383)
d2ftxa1	89	82	20	14	13	3.640	0.741	0.624	0.517	0.542	0.579	0	0	1	1	0	0	d	d.300.1.1	A(133-221)
d2fupa1	128	128	34	13	12	5.304	1.360	0.542	0.522	0.415	0.542	0	0	1	1	0	0	a	a.47.5.1	A(1-130)
d2fvya_	305	300	38	20	19	14.440	0.974	0.604	0.508	0.428	0.563	0	0	1	1	0	0	c	c.93.1.1	A
d2fyuk_	53	47	36	10	8	2.880	2.000	0.353	0.311	0.409	0.345	0	1	0	0	0	1	f	f.23.15.1	K
d2fzpa1	125	122	21	17	15	5.355	0.656	0.603	0.543	0.580	0.585	0	0	1	1	0	0	d	d.345.1.1	A(193-317)
d2fzta1	78	71	34	12	8	3.264	1.700	0.511	0.456	0.470	0.489	0	0	1	0	0	0	a	a.46.3.1	A(1-78)
d2g0da_	404	396	34	27	22	20.196	0.694	0.611	0.512	0.565	0.570	0	0	1	1	0	0	a	a.102.6.1	A
d2g5fa1	435	420	33	28	23	21.252	0.647	0.568	0.476	0.542	0.535	0	0	1	0	0	0	d	d.161.1.1	A(15-449)
d2g6fx1	54	52	14	12	10	1.680	0.636	0.625	0.605	0.518	0.634	0	0	1	1	0	0	b	b.34.2.1	X(10-63)
d2g6ta1	305	279	40	24	16	15.360	1.000	0.535	0.455	0.493	0.502	0	0	1	0	0	0	c	c.147.1.1	A(1-305)
d2g77a1	197	187	27	22	18	10.692	0.675	0.582	0.458	0.682	0.531	0	0	1	0	0	0	a	a.69.2.1	A(246-442)
d2g7oa1	68	56	27	16	6	2.592	1.227	0.339	0.369	0.100	0.352	0	1	0	0	1	0	a	a.241.1.1	A(60-127)
d2gb5a2	29	25	14	9	6	0.756	0.933	0.663	0.630	0.884	0.666	0	0	1	1	0	0	g	g.41.14.1	A(97-125)
d2gboa1	82	74	60	10	5	3.000	4.000	0.376	0.404	0.354	0.395	0	1	0	0	1	1	a	a.23.6.1	A(1-82)
d2geca1	138	116	21	16	15	5.040	0.677	0.642	0.521	0.766	0.586	0	0	1	1	0	0	b	b.148.1.1	A(23-160)
d2gf4a1	89	76	36	11	10	3.960	1.714	0.603	0.452	0.591	0.531	0	0	1	0	0	0	a	a.8.10.1	A(1-89)
d2gfqa1	286	272	33	22	18	13.068	0.825	0.627	0.539	0.655	0.595	0	0	1	1	0	0	c	c.56.7.1	A(-11-274)
d2ggca_	263	255	26	23	18	10.764	0.634	0.602	0.552	0.658	0.586	0	0	1	1	0	0	d	d.127.1.1	A
d2gk6a2	84	79	19	15	12	3.420	0.704	0.629	0.541	0.539	0.587	0	0	1	1	0	0	b	b.49.4.1	A(325-415)
d2gkga_	122	119	20	17	14	4.760	0.645	0.620	0.528	0.673	0.579	0	0	1	1	0	0	c	c.23.1.0	A
d2gkpa1	164	161	23	22	15	7.590	0.622	0.561	0.504	0.471	0.546	0	0	1	1	0	0	d	d.351.1.1	A(1-164)
d2glza1	149	140	28	17	14	6.664	0.903	0.598	0.510	0.493	0.566	0	0	1	1	0	0	d	d.81.3.1	A(3-151)
d2gnxa1	147	123	29	18	12	6.264	0.967	0.589	0.493	0.550	0.554	0	0	1	0	0	0	a	a.246.3.1	A(123-294)
d2gnxa2	120	113	21	17	14	4.998	0.677	0.590	0.538	0.725	0.579	0	0	1	1	0	0	d	d.109.3.1	A(295-440)
d2goma1	61	60	21	12	8	2.016	1.050	0.628	0.612	0.450	0.631	0	0	1	1	0	0	a	a.7.17.1	A(105-165)
d2gp4a2	332	317	30	25	20	15.000	0.667	0.558	0.488	0.660	0.532	0	0	1	0	0	0	d	d.334.1.1	A(1-418)
d2gpia1	90	84	21	13	11	3.003	0.875	0.630	0.588	0.715	0.614	0	0	1	1	0	0	d	d.354.1.1	A(1-90)
d2gqba1	130	116	31	15	14	6.510	1.069	0.524	0.413	0.447	0.472	0	0	1	0	0	0	a	a.282.1.1	A(1-130)
d2grga1	97	93	19	16	12	3.648	0.679	0.617	0.548	0.743	0.598	0	0	1	1	0	0	d	d.110.10.1	A(2-98)
d2gria1	112	103	30	16	12	5.760	1.071	0.545	0.440	0.411	0.496	0	0	1	0	0	0	d	d.15.14.1	A(1-112)
d2grrb_	157	148	21	18	16	6.048	0.618	0.602	0.543	0.659	0.584	0	0	1	1	0	0	a	a.118.12.1	B
d2gsva1	67	63	22	12	10	2.640	1.000	0.617	0.541	0.560	0.586	0	0	1	1	0	0	a	a.23.7.1	A(3-69)
d2gtlm1	124	119	24	17	13	5.304	0.800	0.604	0.520	0.511	0.574	0	0	1	1	0	0	b	b.61.7.1	M(102-225)
d2gtlm3	51	46	44	10	6	2.640	2.750	0.339	0.334	0.251	0.346	0	1	0	0	0	1	h	h.1.32.1	M(9-59)
d2guda1	121	106	21	14	12	3.528	0.808	0.585	0.567	0.435	0.579	0	0	1	1	0	0	b	b.77.3.1	A(1-121)
d2guka1	111	105	23	17	13	5.083	0.767	0.528	0.480	0.607	0.517	0	0	1	0	0	0	d	d.360.1.1	A(4-114)
d2h1ta1	186	168	25	20	17	8.500	0.676	0.571	0.490	0.641	0.541	0	0	1	0	0	0	b	b.178.1.1	A(2-187)
d2h1va_	309	287	34	24	17	13.872	0.829	0.569	0.514	0.464	0.553	0	0	1	1	0	0	c	c.92.1.1	A
d2h4oa1	62	45	20	13	12	3.120	0.800	0.387	0.330	0.186	0.360	0	1	0	0	0	0	d	d.368.1.1	A(2-63)
d2h5na1	132	120	19	16	16	4.864	0.594	0.629	0.539	0.555	0.588	0	0	1	1	0	0	a	a.287.1.2	A(1-132)
d2h6fb1	401	371	33	26	21	18.018	0.702	0.626	0.516	0.617	0.575	0	0	1	1	0	0	a	a.102.4.3	B(521-921)
d2h7aa1	108	79	24	18	12	5.184	0.800	0.496	0.372	0.722	0.453	0	1	0	0	0	0	d	d.350.1.1	A(3-110)
d2h8ea_	120	106	24	16	12	4.608	0.857	0.618	0.532	0.471	0.574	0	0	1	1	0	0	d	d.79.6.1	A
d2h9ec_	52	43	20	10	7	1.400	1.176	0.669	0.537	0.379	0.599	0	0	1	1	0	0	g	g.22.1.1	C
d2hbaa1	52	49	18	12	8	1.728	0.900	0.575	0.544	0.724	0.580	0	0	1	1	0	0	d	d.100.1.1	A(1-52)
d2hbwa1	73	70	17	12	11	2.244	0.739	0.632	0.578	0.526	0.607	0	0	1	1	0	0	b	b.34.11.0	A(14-86)
d2hc5a1	108	97	22	18	13	5.148	0.710	0.585	0.484	0.652	0.548	0	0	1	0	0	0	d	d.352.1.1	A(2-109)
d2heqa1	65	60	16	13	11	2.288	0.667	0.611	0.575	0.609	0.613	0	0	1	1	0	0	b	b.34.20.1	A(7-71)
d2hf1a1	59	54	18	12	9	1.944	0.857	0.648	0.543	0.502	0.592	0	0	1	1	0	0	b	b.171.1.1	A(2-60)
d2hfqa1	85	84	22	14	12	3.696	0.846	0.615	0.528	0.734	0.583	0	0	1	1	0	0	d	d.375.1.1	A(1-85)
d2hg4a1	28	28	25	5	5	0.625	2.500	0.845	0.714	0.793	0.786	0	0	1	1	0	1	h	h.1.38.1	A(9-36)
d2hg4a4	84	79	18	14	11	2.772	0.720	0.554	0.524	0.471	0.543	0	0	1	1	0	0	d	d.390.1.1	A(466-549)
d2hg6a1	106	96	25	17	11	4.675	0.893	0.577	0.484	0.392	0.535	0	0	1	0	0	0	d	d.364.1.1	A(1-106)
d2hg7a1	60	55	17	15	11	2.805	0.654	0.603	0.487	0.709	0.551	0	0	1	0	0	0	d	d.186.2.1	A(1-60)
d2hgka1	109	107	24	19	14	6.384	0.727	0.561	0.440	0.489	0.507	0	0	1	0	0	0	a	a.29.17.1	A(1-109)
d2hh8a1	127	122	20	17	15	5.100	0.625	0.589	0.553	0.593	0.580	0	0	1	1	0	0	d	d.358.1.1	A(7-133)
d2hi7b1	134	122	26	18	15	7.020	0.788	0.486	0.423	0.739	0.468	0	1	0	0	0	0	a	a.29.15.1	B(14-162)
d2hiya1	179	176	27	18	17	8.262	0.771	0.580	0.511	0.606	0.557	0	0	1	1	0	0	d	d.356.1.1	A(1-180)
d2hmza_	113	112	23	16	13	4.784	0.793	0.633	0.582	0.345	0.618	0	0	1	1	0	0	a	a.24.4.1	A
d2hnga1	124	111	35	15	10	5.250	1.400	0.627	0.512	0.619	0.575	0	0	1	1	0	0	d	d.33.1.2	A(5-128)
d2hnua_	81	77	18	14	11	2.772	0.720	0.611	0.536	0.739	0.593	0	0	1	1	0	0	b	b.9.1.1	A
d2hp8a_	68	64	19	14	8	2.128	0.864	0.617	0.588	0.579	0.609	0	0	1	1	0	0	a	a.17.1.1	A
d2hq4a1	149	146	29	17	13	6.409	0.967	0.623	0.558	0.625	0.604	0	0	1	1	0	0	d	d.342.1.1	A(1-152)
d2hqsa1	270	264	25	24	21	12.600	0.556	0.536	0.497	0.185	0.523	0	0	1	0	0	0	b	b.68.4.1	A(163-432)
d2hqsa2	139	124	25	15	14	5.250	0.862	0.593	0.525	0.598	0.577	0	0	1	1	0	0	c	c.51.2.1	A(24-162)
d2hqsc2	106	104	25	15	11	4.125	0.962	0.623	0.564	0.641	0.612	0	0	1	1	0	0	d	d.79.7.1	C(68-173)
d2hs1a_	99	93	21	17	11	3.927	0.750	0.599	0.493	0.721	0.549	0	0	1	0	0	0	b	b.50.1.1	A
d2huha1	147	137	27	17	14	6.426	0.871	0.609	0.532	0.676	0.585	0	0	1	1	0	0	b	b.7.5.1	A(81-227)
d2hw4a1	110	108	23	16	13	4.784	0.793	0.640	0.544	0.586	0.608	0	0	1	1	0	0	d	d.322.1.1	A(5-122)
d2hy5a1	130	123	23	18	13	5.382	0.742	0.617	0.535	0.616	0.591	0	0	1	1	0	0	c	c.114.1.1	A(1-130)
d2i06a_	305	298	39	27	21	22.113	0.812	0.312	0.325	0.082	0.320	0	1	0	0	1	0	e	e.2.1.1	A
d2i0za2	165	158	32	16	13	6.656	1.103	0.611	0.546	0.492	0.584	0	0	1	1	0	0	e	e.74.1.1	A(193-361)
d2i15a1	122	106	35	20	12	8.400	1.094	0.411	0.311	0.484	0.374	0	1	0	0	0	0	a	a.291.1.1	A(1-129)
d2i1sa1	178	164	34	18	13	7.956	1.097	0.613	0.520	0.487	0.576	0	0	1	1	0	0	d	d.343.1.1	A(4-188)
d2i53a1	144	142	25	19	14	6.650	0.758	0.618	0.534	0.707	0.593	0	0	1	1	0	0	a	a.74.1.1	A(14-157)
d2i5ha1	178	166	36	17	13	7.956	1.200	0.615	0.523	0.545	0.583	0	0	1	1	0	0	e	e.71.1.1	A(16-195)
d2i5ua1	74	74	17	15	11	2.805	0.654	0.620	0.580	0.498	0.611	0	0	1	1	0	0	a	a.275.1.1	A(2-75)
d2i5vo_	246	225	46	23	13	13.754	1.278	0.514	0.396	0.540	0.461	0	0	1	0	0	0	b	b.76.1.1	O
d2i71a1	368	337	46	24	15	16.560	1.179	0.624	0.511	0.670	0.577	0	0	1	1	0	0	e	e.72.1.1	A(1-377)
d2i8da1	121	114	31	18	17	9.486	0.886	0.340	0.306	0.305	0.337	0	1	0	0	0	0	d	d.198.4.1	A(2-122)
d2i9ia1	221	199	46	16	14	10.304	1.533	0.617	0.508	0.417	0.566	0	0	1	1	0	0	c	c.51.6.1	A(51-271)
d2i9wa2	39	33	23	9	7	1.449	1.438	0.625	0.475	0.729	0.562	0	0	1	0	0	0	g	g.74.1.1	A(1-39)
d2i9xa1	84	74	20	16	12	3.840	0.714	0.624	0.488	0.472	0.563	0	0	1	0	0	0	d	d.366.1.1	A(1-84)
d2ia1a1	164	157	26	23	16	9.568	0.667	0.616	0.484	0.696	0.569	0	0	1	0	0	0	d	d.359.1.1	A(2-166)
d2ia7a1	111	99	24	16	12	4.608	0.857	0.595	0.507	0.550	0.558	0	0	1	1	0	0	d	d.373.1.1	A(23-133)
d2iafa1	140	135	20	19	15	5.700	0.588	0.626	0.562	0.546	0.604	0	0	1	1	0	0	d	d.81.2.1	A(4-148)
d2iaya1	113	106	22	16	14	4.928	0.733	0.592	0.517	0.463	0.567	0	0	1	1	0	0	d	d.376.1.1	A(1-113)
d2icha1	320	312	29	25	22	15.950	0.617	0.581	0.504	0.593	0.559	0	0	1	1	0	0	b	b.176.1.1	A(24-351)
d2icwg_	213	201	36	23	16	13.248	0.923	0.495	0.403	0.623	0.458	0	1	0	0	0	0	a	a.202.1.1	G
d2idla1	112	106	25	15	12	4.500	0.926	0.607	0.534	0.552	0.575	0	0	1	1	0	0	d	d.64.2.1	A(1-112)
d2idob_	75	66	24	14	10	3.360	1.000	0.584	0.463	0.771	0.534	0	0	1	0	0	0	a	a.237.1.1	B
d2igda_	61	58	20	12	9	2.160	0.952	0.637	0.559	0.592	0.607	0	0	1	1	0	0	d	d.15.7.1	A
d2ih2a2	170	162	31	17	14	7.378	1.000	0.617	0.551	0.681	0.598	0	0	1	1	0	0	d	d.287.1.1	A(244-413)
d2ih3c_	98	87	33	12	9	3.564	1.571	0.563	0.502	0.530	0.544	0	0	1	1	0	0	f	f.14.1.1	C
d2ijra1	280	263	42	20	17	14.280	1.135	0.549	0.470	0.545	0.526	0	0	1	0	0	0	e	e.66.1.1	A(3-282)
d2ilka_	155	139	40	20	18	14.400	1.053	0.340	0.257	0.473	0.310	1	0	0	0	0	0	a	a.26.1.3	A
d2im8a_	123	118	29	14	13	5.278	1.074	0.627	0.538	0.542	0.592	0	0	1	1	0	0	a	a.24.26.1	A
d2imqx_	280	271	30	23	20	13.800	0.698	0.600	0.503	0.625	0.562	0	0	1	1	0	0	d	d.151.1.2	X
d2in5a1	194	185	27	23	14	8.694	0.730	0.593	0.515	0.584	0.562	0	0	1	1	0	0	b	b.177.1.1	A(3-199)
d2inwa1	117	100	21	15	13	4.095	0.750	0.593	0.541	0.584	0.578	0	0	1	1	0	0	d	d.110.8.1	A(4-120)
d2ioja1	120	120	18	17	14	4.284	0.581	0.582	0.562	0.595	0.579	0	0	1	1	0	0	c	c.98.2.2	A(206-325)
d2isba2	180	171	24	20	15	7.200	0.686	0.592	0.564	0.702	0.594	0	0	1	1	0	0	c	c.8.9.1	A(1-180)
d2iw5b2	68	49	44	10	5	2.200	2.933	0.448	0.402	0.432	0.433	0	1	0	0	0	1	h	h.1.35.1	B(308-375)
d2ixma1	300	278	30	22	21	13.860	0.698	0.596	0.518	0.586	0.572	0	0	1	1	0	0	a	a.268.1.1	A(23-322)
d2izxa_	39	33	14	12	8	1.344	0.700	0.685	0.516	0.628	0.604	0	0	1	1	0	0	a	a.31.1.1	A
d2j4wd1	34	32	17	8	8	1.088	1.062	0.632	0.548	0.779	0.595	0	0	1	1	0	0	g	g.61.1.1	D(421-454)
d2j6ba1	109	102	21	16	12	4.032	0.750	0.568	0.520	0.559	0.559	0	0	1	1	0	0	d	d.321.1.1	A(1-109)
d2j8ga1	149	128	36	14	12	6.048	1.385	0.632	0.523	0.550	0.583	0	0	1	1	0	0	b	b.109.1.1	A(191-339)
d2j8ka1	174	173	33	13	13	5.577	1.269	0.523	0.577	0.264	0.563	0	0	1	1	1	0	b	b.80.8.1	A(2-175)
d2j9wa1	98	96	24	14	13	4.368	0.889	0.635	0.564	0.556	0.609	0	0	1	1	0	0	a	a.24.28.0	A(123-220)
d2jdig_	184	165	46	17	12	9.384	1.586	0.513	0.424	0.556	0.480	0	0	1	0	0	0	c	c.49.2.1	G
d2jdih1	45	42	22	9	6	1.188	1.467	0.639	0.591	0.523	0.625	0	0	1	1	0	0	a	a.2.10.1	H(101-145)
d2jdih2	43	42	14	11	10	1.540	0.667	0.532	0.524	0.745	0.539	0	0	1	1	0	0	b	b.93.1.1	H(17-100)
d2jdii_	25	25	19	8	6	0.912	1.357	0.597	0.517	0.278	0.553	0	0	1	1	0	0	a	a.137.8.1	I
d2je6a2	84	77	25	13	10	3.250	1.087	0.585	0.502	0.579	0.554	0	0	1	1	0	0	d	d.101.1.1	A(192-275)
d2je6i2	59	57	16	12	9	1.728	0.762	0.611	0.576	0.443	0.600	0	0	1	1	0	0	b	b.84.4.2	I(7-65)
d2jeka1	140	137	22	18	14	5.544	0.688	0.624	0.574	0.567	0.615	0	0	1	1	0	0	a	a.255.1.1	A(6-145)
d2jfra_	234	218	25	22	16	8.800	0.658	0.586	0.521	0.543	0.565	0	0	1	1	0	0	d	d.219.1.0	A
d2jlia_	100	92	18	16	12	3.456	0.643	0.637	0.561	0.752	0.609	0	0	1	1	0	0	d	d.367.1.0	A
d2jn4a1	66	66	15	12	11	1.980	0.652	0.564	0.585	0.328	0.570	0	0	1	1	1	0	b	b.173.1.1	A(1-66)
d2jn9a1	95	87	20	16	11	3.520	0.741	0.568	0.536	0.688	0.562	0	0	1	1	0	0	b	b.45.3.1	A(3-97)
d2jnaa1	96	79	27	18	10	4.860	0.964	0.419	0.346	0.327	0.388	0	1	0	0	0	0	d	d.230.6.1	A(1-96)
d2jnea1	71	64	24	11	9	2.376	1.200	0.537	0.506	0.676	0.533	0	0	1	1	0	0	g	g.41.18.1	A(1-71)
d2joda1	101	92	26	15	11	4.290	1.000	0.620	0.492	0.738	0.560	0	0	1	0	0	0	g	g.76.1.1	A(22-122)
d2joea1	130	126	25	16	13	5.200	0.862	0.492	0.493	0.335	0.498	0	1	0	0	1	0	d	d.371.1.1	A(2-131)
d2joqa1	86	75	23	13	10	2.990	1.000	0.608	0.563	0.485	0.594	0	0	1	1	0	0	d	d.58.54.2	A(4-89)
d2jova1	77	74	23	12	10	2.760	1.045	0.594	0.549	0.376	0.576	0	0	1	1	0	0	d	d.349.1.1	A(1-77)
d2jw6a_	42	41	15	11	8	1.320	0.789	0.671	0.596	0.635	0.643	0	0	1	1	0	0	g	g.85.1.1	A
d2jxta1	78	74	22	14	11	3.388	0.880	0.562	0.512	0.618	0.549	0	0	1	1	0	0	d	d.355.1.1	A(1-78)
d2k2ca1	82	69	19	16	11	3.344	0.704	0.534	0.459	0.687	0.505	0	0	1	0	0	0	g	g.89.1.1	A(1-82)
d2k2ca2	55	50	22	14	6	1.848	1.100	0.608	0.589	0.394	0.605	0	0	1	1	0	0	g	g.93.1.0	A(83-137)
d2k5wa1	108	85	24	18	11	4.752	0.828	0.591	0.455	0.599	0.531	0	0	1	0	0	0	b	b.40.13.1	A(2-109)
d2khla_	93	86	26	15	10	3.900	1.040	0.645	0.501	0.743	0.583	0	0	1	1	0	0	d	d.247.1.1	A
d2kkwa_	140	119	62	23	19	27.094	1.476	0.086	0.084	0.107	0.087	1	0	0	0	0	0	h	h.7.1.1	A
d2l4la_	45	39	17	11	7	1.309	0.944	0.592	0.553	0.768	0.583	0	0	1	1	0	0	g	g.40.1.1	A
d2l6qa_	62	52	21	11	10	2.310	1.000	0.487	0.459	0.312	0.481	0	1	0	0	0	0	d	d.186.1.1	A
d2l9va_	49	47	17	12	10	2.040	0.773	0.656	0.520	0.406	0.589	0	0	1	1	0	0	a	a.159.2.1	A
d2lrra_	70	66	21	14	10	2.940	0.875	0.623	0.511	0.509	0.570	0	0	1	1	0	0	d	d.68.7.1	A
d2m9xa1	101	99	23	15	12	4.140	0.852	0.569	0.535	0.409	0.557	0	0	1	1	0	0	a	a.29.10.1	A(12-112)
d2n29a_	54	47	22	17	6	2.244	0.957	0.329	0.368	0.016	0.341	0	1	0	0	1	0	g	g.34.1.1	A
d2naca2	186	173	27	20	14	7.560	0.794	0.596	0.534	0.574	0.578	0	0	1	1	0	0	c	c.23.12.1	A(1-147,336-374)
d2nlsa_	36	35	15	11	5	0.825	0.938	0.712	0.615	0.851	0.672	0	0	1	1	0	0	g	g.9.1.1	A
d2nlva1	111	98	25	14	13	4.550	0.926	0.631	0.534	0.599	0.596	0	0	1	1	0	0	d	d.326.1.1	A(1-111)
d2nmla1	100	88	23	16	11	4.048	0.852	0.613	0.511	0.587	0.568	0	0	1	1	0	0	d	d.330.1.1	A(2-101)
d2nn4a1	61	61	18	13	10	2.340	0.783	0.607	0.557	0.539	0.591	0	0	1	1	0	0	a	a.272.1.1	A(2-62)
d2nnua2	200	181	41	21	14	12.054	1.171	0.506	0.394	0.677	0.461	0	0	1	0	0	0	b	b.91.1.1	A(1-200)
d2nr5a1	60	59	31	12	5	1.860	1.824	0.682	0.607	0.598	0.652	0	0	1	1	0	0	a	a.25.6.1	A(1-64)
d2nsza1	129	123	21	17	14	4.998	0.677	0.599	0.563	0.566	0.593	0	0	1	1	0	0	a	a.118.1.14	A(322-450)
d2ntka2	202	191	23	20	17	7.820	0.622	0.628	0.572	0.601	0.615	0	0	1	1	0	0	d	d.153.2.1	A(1-202)
d2nw8a_	266	246	36	20	19	13.680	0.923	0.525	0.464	0.573	0.505	0	0	1	0	0	0	a	a.266.1.0	A
d2nxpa1	149	145	24	17	16	6.528	0.727	0.598	0.548	0.726	0.587	0	0	1	1	0	0	d	d.379.1.1	A(195-343)
d2nxya1	304	267	31	29	17	15.283	0.674	0.573	0.461	0.590	0.528	0	0	1	0	0	0	d	d.172.1.1	A(83-491)
d2nyda1	298	237	33	23	16	12.144	0.846	0.612	0.496	0.619	0.564	0	0	1	0	0	0	c	c.135.1.0	A(1-366)
d2o2ka_	332	313	38	25	20	19.000	0.844	0.479	0.426	0.427	0.465	0	1	0	0	0	0	d	d.173.1.0	A
d2o3bb2	134	131	24	22	11	5.808	0.727	0.571	0.504	0.534	0.548	0	0	1	1	0	0	d	d.221.1.1	B(2-135)
d2o3ia1	376	364	33	25	20	16.500	0.733	0.574	0.507	0.523	0.551	0	0	1	1	0	0	e	e.73.1.1	A(2-390)
d2o4ta1	90	78	22	16	11	3.872	0.815	0.530	0.442	0.801	0.506	0	0	1	0	0	0	a	a.69.4.1	A(16-105)
d2o5ha1	125	117	22	17	14	5.236	0.710	0.634	0.553	0.536	0.603	0	0	1	1	0	0	d	d.363.1.1	A(1-131)
d2o6ka1	70	67	15	13	12	2.340	0.600	0.627	0.607	0.590	0.622	0	0	1	1	0	0	a	a.60.15.1	A(4-73)
d2o70a1	165	162	31	19	13	7.657	0.969	0.573	0.514	0.372	0.549	0	0	1	1	0	0	a	a.288.1.1	A(2-166)
d2o8ra1	94	85	30	12	10	3.600	1.364	0.573	0.533	0.610	0.563	0	0	1	1	0	0	a	a.7.15.1	A(4-112)
d2o8sa1	220	213	31	23	15	10.695	0.816	0.556	0.469	0.536	0.516	0	0	1	0	0	0	a	a.295.1.1	A(54-278)
d2o9ux_	96	90	23	15	12	4.140	0.852	0.626	0.533	0.478	0.586	0	0	1	1	0	0	d	d.17.1.1	X
d2oa5a2	88	76	39	12	10	4.680	1.773	0.447	0.360	0.696	0.417	0	1	0	0	0	0	d	d.362.1.1	A(6-102)
d2oara1	118	85	38	17	11	7.106	1.357	0.354	0.282	0.446	0.325	1	0	0	0	0	0	f	f.16.1.1	A(1-118)
d2ob5a1	147	141	20	19	15	5.700	0.588	0.613	0.548	0.618	0.594	0	0	1	1	0	0	c	c.133.1.1	A(1-147)
d2od0a1	103	95	18	17	15	4.590	0.562	0.595	0.490	0.743	0.556	0	0	1	0	0	0	d	d.198.5.2	A(3-105)
d2odka1	51	49	20	13	8	2.080	0.952	0.609	0.489	0.666	0.563	0	0	1	0	0	0	d	d.306.1.1	A(1-51)
d2oeba1	152	146	23	19	14	6.118	0.697	0.613	0.560	0.505	0.603	0	0	1	1	0	0	a	a.70.2.1	A(2-153)
d2oeea1	92	77	29	16	10	4.640	1.115	0.443	0.395	0.427	0.430	0	1	0	0	0	0	a	a.281.1.2	A(3-112)
d2oeza1	240	216	35	28	14	13.720	0.833	0.435	0.377	0.470	0.410	0	1	0	0	0	0	e	e.68.1.1	A(2-245)
d2ofca_	141	139	22	18	14	5.544	0.688	0.623	0.573	0.692	0.607	0	0	1	1	0	0	b	b.97.1.2	A
d2ogfa1	119	106	29	14	11	4.466	1.160	0.626	0.546	0.484	0.590	0	0	1	1	0	0	d	d.316.1.0	A(2-120)
d2ohwa1	128	126	20	17	15	5.100	0.625	0.604	0.545	0.575	0.584	0	0	1	1	0	0	d	d.79.8.1	A(3-130)
d2oj5b1	20	19	11	9	4	0.396	0.846	0.619	0.560	0.885	0.602	0	0	1	1	0	0	b	b.83.1.0	B(293-312)
d2okua1	122	119	32	15	11	5.280	1.231	0.602	0.543	0.559	0.586	0	0	1	1	0	0	a	a.48.5.1	A(443-564)
d2ot3a_	253	236	42	23	13	12.558	1.167	0.595	0.482	0.537	0.553	0	0	1	0	0	0	a	a.222.1.1	A
d2otaa1	62	55	23	13	13	3.887	0.885	0.277	0.295	0.145	0.290	1	0	0	0	1	0	a	a.284.1.1	A(7-68)
d2ouxa1	130	125	29	15	13	5.655	1.036	0.608	0.546	0.640	0.588	0	0	1	1	0	0	a	a.118.26.1	A(6-135)
d2ox7a1	142	114	31	16	12	5.952	1.107	0.615	0.492	0.618	0.570	0	0	1	0	0	0	b	b.172.1.1	A(4-145)
d2oy9a1	85	78	21	13	13	3.549	0.808	0.602	0.534	0.622	0.580	0	0	1	1	0	0	a	a.276.1.1	A(6-90)
d2p02a1	110	97	27	13	11	3.861	1.125	0.582	0.497	0.540	0.548	0	0	1	0	0	0	d	d.130.1.1	A(38-147)
d2p0ta1	148	133	43	17	12	8.772	1.483	0.392	0.363	0.266	0.384	0	1	0	0	0	0	a	a.290.1.1	A(22-169)
d2p12a1	165	156	22	20	18	7.920	0.579	0.561	0.484	0.637	0.536	0	0	1	0	0	0	b	b.175.1.1	A(8-172)
d2p2ua1	150	129	54	35	9	17.010	1.227	0.055	0.137	0.000	0.098	1	0	0	0	1	0	h	h.4.18.1	A(9-161)
d2p3pa1	197	190	36	23	13	10.764	1.000	0.588	0.457	0.610	0.533	0	0	1	0	0	0	d	d.383.1.1	A(66-262)
d2p5ka_	63	63	19	12	10	2.280	0.864	0.609	0.564	0.534	0.591	0	0	1	1	0	0	a	a.4.5.3	A
d2p5ma_	82	79	17	14	10	2.380	0.708	0.620	0.601	0.690	0.616	0	0	1	1	0	0	d	d.74.2.1	A
d2p5zx1	71	62	19	12	11	2.508	0.826	0.606	0.514	0.488	0.559	0	0	1	1	0	0	b	b.40.8.1	X(378-468)
d2p62a1	241	227	35	20	17	11.900	0.946	0.576	0.507	0.528	0.557	0	0	1	1	0	0	e	e.67.1.1	A(1-241)
d2p6va1	97	91	20	15	13	3.900	0.714	0.598	0.526	0.601	0.568	0	0	1	1	0	0	a	a.277.1.1	A(582-678)
d2p8ia2	116	112	21	20	13	5.460	0.636	0.619	0.523	0.671	0.584	0	0	1	1	0	0	d	d.58.55.1	A(1-116)
d2p8qb_	39	35	34	8	6	1.632	2.429	0.482	0.395	0.525	0.448	0	1	0	0	0	1	g	g.88.2.1	B
d2p90a1	269	238	32	22	20	14.080	0.762	0.580	0.442	0.615	0.523	0	0	1	0	0	0	c	c.56.8.1	A(6-274)
d2pbka_	228	219	25	22	19	10.450	0.610	0.584	0.495	0.587	0.549	0	0	1	0	0	0	b	b.57.1.1	A
d2pefa_	366	350	36	23	21	17.388	0.818	0.607	0.516	0.697	0.575	0	0	1	1	0	0	e	e.1.1.0	A
d2phcb2	84	79	21	14	10	2.940	0.875	0.602	0.553	0.512	0.582	0	0	1	1	0	0	d	d.74.5.1	B(2-85)
d2phna_	248	227	30	23	15	10.350	0.789	0.561	0.490	0.526	0.531	0	0	1	0	0	0	d	d.340.1.1	A
d2pifa1	252	247	28	23	16	10.304	0.718	0.542	0.519	0.422	0.537	0	0	1	1	0	0	d	d.382.1.1	A(7-262)
d2pjua1	186	177	30	19	15	8.550	0.882	0.525	0.480	0.582	0.513	0	0	1	0	0	0	c	c.92.3.1	A(11-196)
d2pk8a_	94	93	25	14	12	4.200	0.962	0.623	0.531	0.524	0.585	0	0	1	1	0	0	d	d.274.1.1	A
d2pkgc1	80	74	17	16	12	3.264	0.607	0.638	0.529	0.639	0.591	0	0	1	1	0	0	g	g.92.1.1	C(91-170)
d2pmra1	75	74	24	13	10	3.120	1.043	0.604	0.552	0.526	0.589	0	0	1	1	0	0	a	a.8.11.1	A(3-77)
d2pmsc1	105	94	43	13	10	5.590	1.870	0.583	0.420	0.707	0.511	0	0	1	0	0	0	h	h.4.19.1	C(168-288)
d2prva1	152	139	23	19	14	6.118	0.697	0.602	0.532	0.574	0.580	0	0	1	1	0	0	d	d.369.1.1	A(1-152)
d2psba1	290	278	27	24	21	13.608	0.600	0.599	0.516	0.691	0.571	0	0	1	1	0	0	c	c.153.1.1	A(13-308)
d2pv4a1	144	133	29	17	13	6.409	0.967	0.586	0.493	0.735	0.556	0	0	1	0	0	0	a	a.286.1.1	A(1-144)
d2pvba_	107	107	18	16	14	4.032	0.600	0.608	0.567	0.556	0.595	0	0	1	1	0	0	a	a.39.1.4	A
d2pwwa1	113	105	24	16	12	4.608	0.857	0.611	0.542	0.667	0.584	0	0	1	1	0	0	d	d.129.11.1	A(2-114)
d2pyqa1	113	113	21	17	14	4.998	0.677	0.613	0.517	0.810	0.577	0	0	1	1	0	0	a	a.279.1.1	A(1-113)
d2q03a1	133	129	29	15	12	5.220	1.074	0.543	0.507	0.486	0.531	0	0	1	1	0	0	b	b.159.2.1	A(5-137)
d2q22a1	130	120	22	16	13	4.576	0.759	0.598	0.562	0.570	0.590	0	0	1	1	0	0	d	d.365.1.1	A(8-138)
d2q2ga1	83	77	27	12	10	3.240	1.227	0.558	0.513	0.572	0.539	0	0	1	1	0	0	b	b.4.1.0	A(4-86)
d2q3ta_	121	111	26	17	11	4.862	0.929	0.630	0.565	0.603	0.612	0	0	1	1	0	0	a	a.220.1.1	A
d2q40a_	343	326	33	24	21	16.632	0.733	0.557	0.494	0.639	0.539	0	0	1	0	0	0	e	e.50.1.1	A
d2q43a2	102	93	24	13	10	3.120	1.043	0.603	0.573	0.559	0.598	0	0	1	1	0	0	d	d.58.19.1	A(195-313)
d2q4ia_	174	172	28	20	16	8.960	0.778	0.589	0.491	0.506	0.549	0	0	1	0	0	0	b	b.159.1.1	A
d2q4ma_	162	159	22	19	17	7.106	0.611	0.590	0.541	0.694	0.583	0	0	1	1	0	0	d	d.23.1.2	A
d2q6ka1	163	161	20	17	17	5.780	0.588	0.627	0.586	0.641	0.615	0	0	1	1	0	0	c	c.132.1.0	A(1-163)
d2q6ka2	86	83	18	15	13	3.510	0.643	0.595	0.540	0.723	0.584	0	0	1	1	0	0	b	b.141.1.0	A(177-271)
d2q9qa1	114	109	36	16	10	5.760	1.385	0.557	0.475	0.532	0.527	0	0	1	0	0	0	a	a.278.1.2	A(62-175)
d2q9qa2	61	58	22	13	8	2.288	1.048	0.595	0.503	0.618	0.562	0	0	1	1	0	0	d	d.344.1.0	A(1-61)
d2qdla1	146	138	26	17	15	6.630	0.812	0.605	0.513	0.575	0.571	0	0	1	1	0	0	b	b.40.7.0	A(10-155)
d2qdva_	105	103	18	15	14	3.780	0.621	0.639	0.578	0.726	0.616	0	0	1	1	0	0	b	b.6.1.1	A
d2qfaa_	137	118	25	23	13	7.475	0.694	0.557	0.417	0.781	0.504	0	0	1	0	0	0	g	g.52.1.1	A
d2qi9a_	324	289	33	26	17	14.586	0.767	0.579	0.467	0.600	0.529	0	0	1	0	0	0	f	f.22.1.1	A
d2qklb_	90	88	24	13	11	3.432	1.000	0.600	0.564	0.486	0.590	0	0	1	1	0	0	a	a.242.1.1	B
d2qkwa1	101	96	32	12	11	4.224	1.391	0.616	0.525	0.618	0.578	0	0	1	1	0	0	a	a.8.8.1	A(29-129)
d2qn6b_	90	89	23	14	11	3.542	0.920	0.583	0.546	0.419	0.568	0	0	1	1	0	0	d	d.58.51.1	B
d2qp2a2	148	141	23	18	17	7.038	0.657	0.610	0.497	0.441	0.562	0	0	1	0	0	0	b	b.77.4.1	A(358-509)
d2qsba1	85	81	22	13	11	3.146	0.917	0.584	0.557	0.480	0.583	0	0	1	1	0	0	a	a.29.14.1	A(2-86)
d2quda1	122	110	28	20	14	7.840	0.824	0.398	0.323	0.476	0.372	0	1	0	0	0	0	d	d.85.1.1	A(0-127)
d2qupa_	119	113	33	15	10	4.950	1.320	0.592	0.531	0.544	0.576	0	0	1	1	0	0	a	a.24.29.0	A
d2qvja_	421	359	48	25	20	24.000	1.067	0.464	0.402	0.302	0.442	0	1	0	0	0	0	a	a.260.1.1	A
d2qyfa_	197	183	29	21	16	9.744	0.784	0.596	0.485	0.538	0.549	0	0	1	0	0	0	d	d.135.1.1	A
d2r31a2	235	212	37	21	13	10.101	1.088	0.593	0.488	0.596	0.547	0	0	1	0	0	0	d	d.381.1.1	A(4-238)
d2r7ja1	165	149	26	20	16	8.320	0.722	0.583	0.462	0.675	0.533	0	0	1	0	0	0	d	d.13.2.1	A(144-312)
d2r7ja2	142	130	26	18	12	5.616	0.867	0.609	0.528	0.564	0.581	0	0	1	1	0	0	d	d.216.1.1	A(2-143)
d2rbka_	261	260	29	20	19	11.020	0.744	0.608	0.540	0.641	0.577	0	0	1	1	0	0	c	c.108.1.10	A
d2rd0b_	139	127	65	11	9	6.435	3.250	0.607	0.490	0.490	0.556	0	0	1	0	0	1	h	h.4.21.1	B
d2rh2a_	58	51	16	11	9	1.584	0.800	0.640	0.605	0.632	0.633	0	0	1	1	0	0	b	b.34.4.1	A
d2rk3a_	187	177	22	21	17	7.854	0.579	0.602	0.528	0.693	0.581	0	0	1	1	0	0	c	c.23.16.2	A
d2rlda1	113	110	29	14	12	4.872	1.115	0.607	0.537	0.464	0.583	0	0	1	1	0	0	a	a.29.16.1	A(1-115)
d2rr4a1	62	57	22	14	10	3.080	0.917	0.569	0.429	0.704	0.512	0	0	1	0	0	0	g	g.50.2.1	A(246-307)
d2saka_	121	107	28	14	13	5.096	1.037	0.581	0.511	0.489	0.558	0	0	1	1	0	0	d	d.15.5.1	A
d2tpsa1	222	220	25	22	17	9.350	0.641	0.589	0.531	0.540	0.576	0	0	1	1	0	0	c	c.1.3.1	A(14-235)
d2uv4a1	143	130	27	16	14	6.048	0.900	0.572	0.502	0.599	0.550	0	0	1	1	0	0	d	d.37.1.0	A(182-324)
d2v1ya_	90	86	20	14	12	3.360	0.769	0.585	0.556	0.541	0.579	0	0	1	1	0	0	d	d.15.15.1	A
d2v2ba_	272	265	36	20	18	12.960	0.947	0.616	0.508	0.589	0.573	0	0	1	1	0	0	c	c.74.1.1	A
d2v8qb1	73	60	35	18	11	6.930	1.207	0.242	0.191	0.426	0.219	1	0	0	0	0	0	d	d.353.1.1	B(190-272)
d2v94a1	93	89	22	15	11	3.630	0.846	0.613	0.561	0.652	0.597	0	0	1	1	0	0	d	d.12.1.3	A(1-93)
d2vb1a_	129	126	22	14	14	4.312	0.786	0.602	0.583	0.640	0.597	0	0	1	1	0	0	d	d.2.1.2	A
d2vboa_	153	144	28	17	15	7.140	0.875	0.543	0.484	0.536	0.529	0	0	1	0	0	0	d	d.95.2.1	A
d2vbua_	131	127	23	17	15	5.865	0.719	0.556	0.514	0.690	0.548	0	0	1	1	0	0	b	b.43.5.2	A
d2vfra1	238	219	28	22	20	12.320	0.667	0.484	0.426	0.497	0.464	0	1	0	0	0	0	d	d.58.32.6	A(180-417)
d2vgha_	55	47	26	11	7	2.002	1.444	0.596	0.490	0.753	0.550	0	0	1	0	0	0	g	g.25.1.1	A
d2vgna1	122	115	23	18	13	5.382	0.742	0.628	0.522	0.580	0.577	0	0	1	1	0	0	b	b.38.4.1	A(1-135)
d2vn6b_	64	63	17	13	12	2.652	0.680	0.597	0.530	0.279	0.575	0	0	1	1	0	0	a	a.139.1.0	B
d2vpaa_	204	166	44	17	17	12.716	1.294	0.478	0.347	0.627	0.422	0	1	0	0	0	0	b	b.45.1.1	A
d2vv5a2	101	90	24	14	12	4.032	0.923	0.600	0.524	0.410	0.572	0	0	1	1	0	0	d	d.58.43.1	A(180-280)
d2vv5a3	86	74	29	15	7	3.045	1.318	0.586	0.479	0.790	0.542	0	0	1	0	0	0	f	f.34.1.1	A(27-112)
d2vy6a2	56	55	17	12	11	2.244	0.739	0.645	0.531	0.728	0.600	0	0	1	1	0	0	d	d.361.1.0	A(686-741)
d2vy8a_	152	143	23	20	15	6.900	0.657	0.596	0.509	0.697	0.570	0	0	1	1	0	0	d	d.396.1.1	A
d2w1va_	274	250	27	22	19	11.286	0.659	0.606	0.551	0.557	0.595	0	0	1	1	0	0	d	d.160.1.0	A
d2w6ka1	139	133	21	17	14	4.998	0.677	0.607	0.544	0.722	0.584	0	0	1	1	0	0	c	c.151.1.1	A(1-139)
d2w9ja_	71	70	22	14	9	2.772	0.957	0.612	0.532	0.619	0.575	0	0	1	1	0	0	d	d.49.1.0	A
d2wb0x1	89	80	23	14	12	3.864	0.885	0.587	0.494	0.617	0.549	0	0	1	0	0	0	a	a.54.1.1	X(177-265)
d2wb0x2	89	79	25	17	9	3.825	0.962	0.609	0.468	0.586	0.547	0	0	1	0	0	0	g	g.51.1.1	X(266-385)
d2wdsa_	123	112	23	16	13	4.784	0.793	0.604	0.509	0.638	0.564	0	0	1	1	0	0	d	d.150.1.0	A
d2wfia_	172	170	21	20	17	7.140	0.568	0.617	0.556	0.682	0.599	0	0	1	1	0	0	b	b.62.1.1	A
d2wkxa1	82	79	19	15	11	3.135	0.731	0.628	0.556	0.584	0.607	0	0	1	1	0	0	a	a.20.1.1	A(180-261)
d2wlva_	144	138	29	18	11	5.742	1.000	0.647	0.556	0.621	0.610	0	0	1	1	0	0	a	a.73.1.1	A
d2wnpf_	217	217	29	21	16	9.744	0.784	0.623	0.548	0.658	0.593	0	0	1	1	0	0	d	d.171.1.0	F
d2wnya_	137	129	25	16	15	6.000	0.806	0.582	0.518	0.651	0.560	0	0	1	1	0	0	d	d.77.1.0	A
d2woea_	291	285	26	23	20	11.960	0.605	0.612	0.551	0.539	0.595	0	0	1	1	0	0	a	a.209.1.0	A
d2wqka_	248	207	27	21	18	10.206	0.692	0.594	0.503	0.558	0.563	0	0	1	1	0	0	c	c.106.1.0	A
d2wzba_	405	395	37	25	21	19.425	0.804	0.522	0.475	0.356	0.507	0	0	1	0	0	0	c	c.86.1.1	A
d2x41a3	122	115	31	14	10	4.340	1.292	0.579	0.543	0.563	0.568	0	0	1	1	0	0	b	b.1.31.0	A(600-721)
d2x63a_	258	255	29	24	19	13.224	0.674	0.548	0.509	0.587	0.545	0	0	1	1	0	0	c	c.130.1.1	A
d2xaua4	114	102	29	15	12	5.220	1.074	0.616	0.505	0.632	0.575	0	0	1	1	0	0	a	a.289.1.0	A(521-634)
d2xiwa_	64	62	17	14	12	2.856	0.654	0.637	0.508	0.549	0.582	0	0	1	1	0	0	b	b.34.13.1	A
d2xjpa1	249	236	34	18	17	10.404	0.971	0.613	0.516	0.612	0.572	0	0	1	1	0	0	b	b.179.1.2	A(23-271)
d2xola1	166	153	24	22	14	7.392	0.667	0.634	0.531	0.548	0.591	0	0	1	1	0	0	a	a.184.1.1	A(1-166)
d2xova_	181	168	27	17	16	7.344	0.818	0.610	0.535	0.702	0.579	0	0	1	1	0	0	f	f.51.1.1	A
d2xu3a_	220	218	29	19	16	8.816	0.829	0.613	0.557	0.652	0.597	0	0	1	1	0	0	d	d.3.1.0	A
d2xw6a1	128	127	21	17	14	4.998	0.677	0.574	0.550	0.601	0.583	0	0	1	1	0	0	c	c.24.1.2	A(1-128)
d2xysa_	205	189	36	20	15	10.800	1.029	0.574	0.454	0.603	0.522	0	0	1	0	0	0	b	b.96.1.0	A
d2xzga1	330	300	30	25	20	15.000	0.667	0.536	0.498	0.327	0.524	0	0	1	0	0	0	b	b.69.6.1	A(1-330)
d2y0ta_	52	51	21	12	8	2.016	1.050	0.626	0.562	0.465	0.607	0	0	1	1	0	0	a	a.274.1.1	A
d2y5fl_	54	47	25	10	7	1.750	1.471	0.618	0.502	0.457	0.559	0	0	1	1	0	0	g	g.3.11.1	L
d2y8ya1	82	78	19	15	10	2.850	0.760	0.609	0.562	0.563	0.587	0	0	1	1	0	0	d	d.58.53.0	A(1-87)
d2ygsa_	92	92	19	14	13	3.458	0.704	0.610	0.586	0.629	0.601	0	0	1	1	0	0	a	a.77.1.3	A
d2yima_	355	340	44	25	18	19.800	1.023	0.378	0.389	0.353	0.392	0	1	0	0	1	0	c	c.123.1.1	A
d2yivx_	635	594	35	30	29	30.450	0.593	0.583	0.470	0.595	0.534	0	0	1	0	0	0	e	e.26.1.2	X
d2ykza_	127	119	27	15	12	4.860	1.000	0.539	0.524	0.442	0.542	0	0	1	1	0	0	a	a.24.3.2	A
d2ylba_	65	62	16	13	12	2.496	0.640	0.543	0.524	0.376	0.542	0	0	1	1	0	0	b	b.38.1.2	A
d2yvea2	101	92	23	20	11	5.060	0.742	0.451	0.431	0.321	0.454	0	1	0	0	0	0	a	a.121.1.1	A(75-175)
d2z0aa_	72	66	22	14	9	2.772	0.957	0.644	0.513	0.740	0.593	0	0	1	1	0	0	a	a.16.1.1	A
d2z16a1	149	148	22	17	16	5.984	0.667	0.619	0.555	0.526	0.594	0	0	1	1	0	0	a	a.95.1.1	A(2-158)
d2z1ea1	113	105	27	14	12	4.536	1.038	0.599	0.511	0.534	0.567	0	0	1	1	0	0	d	d.79.4.1	A(43-155)
d2z1ea2	179	170	25	21	13	6.825	0.735	0.596	0.534	0.488	0.576	0	0	1	1	0	0	d	d.139.1.1	A(156-334)
d2z48a3	149	145	29	17	14	6.902	0.935	0.589	0.499	0.672	0.563	0	0	1	0	0	0	d	d.281.1.1	A(284-432)
d2z4ua_	261	255	31	22	18	12.276	0.775	0.602	0.515	0.674	0.570	0	0	1	1	0	0	d	d.165.1.1	A
d2z51a1	82	78	19	14	10	2.660	0.792	0.588	0.571	0.484	0.578	0	0	1	1	0	0	d	d.52.8.0	A(1-82)
d2z6ra_	264	253	36	21	18	13.608	0.923	0.532	0.456	0.402	0.501	0	0	1	0	0	0	c	c.90.1.1	A
d2z7fi_	50	44	18	14	6	1.512	0.900	0.619	0.544	0.782	0.598	0	0	1	1	0	0	g	g.3.14.0	I
d2zhja_	315	298	39	22	18	15.444	0.975	0.562	0.483	0.509	0.534	0	0	1	0	0	0	a	a.65.1.1	A
d2zjr31	63	55	26	12	6	1.872	1.444	0.190	0.171	0.400	0.191	1	0	0	0	0	0	d	d.301.1.1	3(2-64)
d2zjr41	37	36	15	9	8	1.080	0.882	0.635	0.604	0.812	0.627	0	0	1	1	0	0	g	g.42.1.1	4(1-37)
d2zjrn1	117	101	49	13	10	6.370	2.130	0.340	0.341	0.311	0.349	0	1	0	0	1	1	a	a.144.2.1	N(2-118)
d2zjro1	94	80	31	15	11	5.115	1.192	0.474	0.374	0.494	0.427	0	1	0	0	0	0	b	b.155.1.1	O(5-98)
d2zjru1	72	66	36	13	8	3.744	1.714	0.237	0.303	0.055	0.272	1	0	0	0	1	0	d	d.325.1.1	U(8-79)
d2znra1	173	162	22	21	17	7.854	0.579	0.606	0.506	0.628	0.568	0	0	1	1	0	0	c	c.97.3.1	A(264-436)
d2zw2a_	85	73	29	15	8	3.480	1.261	0.544	0.470	0.745	0.518	0	0	1	0	0	0	d	d.284.1.0	A
d2zxeb1	41	32	32	4	4	0.512	4.000	0.843	0.775	0.828	0.821	0	0	1	1	0	1	f	f.23.42.1	B(28-68)
d2zxeb2	224	207	32	21	16	10.752	0.865	0.567	0.485	0.558	0.541	0	0	1	0	0	0	b	b.1.32.1	B(69-305)
d2zxeg_	39	32	39	6	4	0.936	3.900	0.657	0.551	0.836	0.610	0	0	1	1	0	1	f	f.23.43.1	G
d2zy9a3	174	152	30	19	12	6.840	0.968	0.602	0.498	0.462	0.556	0	0	1	0	0	0	f	f.57.1.1	A(276-449)
d3a02a_	51	50	15	12	10	1.800	0.682	0.622	0.586	0.709	0.615	0	0	1	1	0	0	a	a.4.1.1	A
d3a0hy_	28	25	24	5	4	0.480	2.667	0.735	0.678	0.772	0.717	0	0	1	1	0	1	f	f.23.41.1	Y
d3a5cg_	129	122	64	9	8	4.608	3.765	0.437	0.372	0.403	0.413	0	1	0	0	0	1	h	h.4.20.1	G
d3a9sa1	359	319	52	19	17	16.796	1.444	0.580	0.477	0.588	0.538	0	0	1	0	0	0	c	c.85.1.0	A(2-360)
d3a9sa2	230	196	32	20	16	10.240	0.889	0.588	0.472	0.657	0.539	0	0	1	0	0	0	b	b.43.2.0	A(361-590)
d3aa0a_	270	218	32	25	16	12.800	0.780	0.572	0.447	0.637	0.520	0	0	1	0	0	0	e	e.43.1.1	A
d3agna_	114	109	20	17	14	4.760	0.645	0.645	0.522	0.631	0.595	0	0	1	1	0	0	d	d.1.1.4	A
d3aiaa1	199	194	25	21	18	9.450	0.641	0.611	0.527	0.596	0.584	0	0	1	1	0	0	c	c.116.1.0	A(2-200)
d3amra_	352	344	29	23	22	14.674	0.644	0.582	0.548	0.376	0.577	0	0	1	1	0	0	b	b.68.3.1	A
d3ar4a1	472	393	44	29	20	25.520	0.898	0.527	0.410	0.513	0.479	0	0	1	0	0	0	f	f.33.1.1	A(1-124,240-343,751-994)
d3ar4a2	115	102	23	16	12	4.416	0.821	0.595	0.526	0.632	0.573	0	0	1	1	0	0	b	b.82.7.1	A(125-239)
d3ar4a4	239	211	27	22	18	10.692	0.675	0.608	0.506	0.593	0.574	0	0	1	1	0	0	d	d.220.1.1	A(361-599)
d3awua1	272	269	29	21	19	11.571	0.725	0.628	0.559	0.664	0.604	0	0	1	1	0	0	a	a.86.1.3	A(2-273)
d3awub_	78	77	18	14	12	3.024	0.692	0.601	0.528	0.513	0.568	0	0	1	1	0	0	d	d.386.1.1	B
d3axja1	221	194	35	19	15	9.975	1.029	0.584	0.498	0.704	0.559	0	0	1	0	0	0	a	a.118.16.0	A(1-221)
d3b0ga1	157	140	28	20	14	7.840	0.824	0.597	0.458	0.717	0.533	0	0	1	0	0	0	d	d.58.36.0	A(18-174)
d3b0ga2	171	160	25	19	15	7.125	0.735	0.619	0.538	0.656	0.594	0	0	1	1	0	0	d	d.134.1.0	A(175-345)
d3b64a_	112	98	21	16	12	4.032	0.750	0.581	0.530	0.549	0.563	0	0	1	1	0	0	d	d.80.1.0	A
d3bbba_	151	146	24	20	15	7.200	0.686	0.590	0.510	0.634	0.565	0	0	1	1	0	0	d	d.58.6.1	A
d3beca1	93	92	28	13	10	3.640	1.217	0.613	0.536	0.675	0.578	0	0	1	1	0	0	b	b.105.1.1	A(263-355)
d3bgea1	163	141	35	19	14	9.310	1.061	0.405	0.353	0.441	0.386	0	1	0	0	0	0	a	a.80.1.2	A(251-434)
d3bhda_	211	207	29	21	17	10.353	0.763	0.541	0.481	0.388	0.513	0	0	1	0	0	0	d	d.63.1.2	A
d3bhpa_	52	43	26	9	7	1.638	1.625	0.586	0.539	0.544	0.574	0	0	1	1	0	0	a	a.2.21.1	A
d3bida1	56	46	21	14	8	2.352	0.955	0.560	0.470	0.712	0.533	0	0	1	0	0	0	d	d.348.1.1	A(1-56)
d3blda_	348	327	33	26	21	18.018	0.702	0.533	0.461	0.631	0.513	0	0	1	0	0	0	c	c.1.20.1	A
d3bmva2	105	98	22	16	11	3.872	0.815	0.637	0.582	0.704	0.620	0	0	1	1	0	0	b	b.3.1.1	A(579-683)
d3bn0a1	95	89	24	15	12	4.320	0.889	0.614	0.530	0.457	0.574	0	0	1	1	0	0	d	d.27.1.1	A(2-102)
d3boea_	209	207	25	19	18	8.550	0.676	0.585	0.555	0.712	0.582	0	0	1	1	0	0	c	c.154.1.1	A
d3bofa1	260	251	26	23	19	11.362	0.619	0.551	0.510	0.542	0.542	0	0	1	1	0	0	c	c.1.21.2	A(301-560)
d3bofa2	300	286	25	24	20	12.000	0.568	0.597	0.553	0.625	0.584	0	0	1	1	0	0	c	c.1.26.1	A(1-300)
d3boya_	147	132	27	17	13	5.967	0.900	0.609	0.510	0.673	0.573	0	0	1	1	0	0	d	d.275.1.1	A
d3bp3a_	81	73	15	14	11	2.310	0.600	0.591	0.579	0.587	0.595	0	0	1	1	0	0	d	d.95.1.1	A
d3bpda1	89	86	24	14	11	3.696	0.960	0.593	0.547	0.448	0.586	0	0	1	1	0	0	d	d.58.61.1	A(2-90)
d3bq9a1	132	123	27	18	16	7.776	0.794	0.491	0.392	0.592	0.454	0	1	0	0	0	0	d	d.58.65.0	A(3-138)
d3bq9a3	101	90	22	18	12	4.752	0.733	0.578	0.470	0.400	0.531	0	0	1	0	0	0	f	f.68.2.0	A(350-450)
d3bqoa_	202	183	32	18	15	8.640	0.970	0.614	0.517	0.723	0.572	0	0	1	1	0	0	a	a.146.1.1	A
d3brfa3	158	144	21	20	15	6.300	0.600	0.608	0.539	0.614	0.581	0	0	1	1	0	0	b	b.42.7.1	A(381-541)
d3bula1	90	83	23	13	12	3.588	0.920	0.627	0.534	0.601	0.586	0	0	1	1	0	0	a	a.46.1.1	A(651-740)
d3bvxa1	111	106	37	13	10	4.810	1.609	0.622	0.524	0.643	0.584	0	0	1	1	0	0	a	a.8.3.1	A(412-522)
d3bvxa2	522	461	38	36	21	28.728	0.667	0.523	0.424	0.504	0.485	0	0	1	0	0	0	b	b.30.5.6	A(523-1044)
d3bvxa3	381	361	32	29	21	19.488	0.640	0.611	0.508	0.566	0.572	0	0	1	1	0	0	c	c.6.2.1	A(31-411)
d3bypa1	82	81	22	13	11	3.146	0.917	0.576	0.540	0.531	0.570	0	0	1	1	0	0	d	d.52.9.1	A(6-87)
d3byqa1	191	179	29	18	15	7.830	0.879	0.638	0.521	0.687	0.585	0	0	1	1	0	0	d	d.79.9.1	A(2-192)
d3bzca3	324	290	48	27	16	20.736	1.116	0.454	0.358	0.443	0.412	0	1	0	0	0	0	a	a.294.1.1	A(1-324)
d3c3da1	303	290	30	23	21	14.490	0.682	0.542	0.493	0.613	0.536	0	0	1	0	0	0	c	c.143.1.1	A(1-303)
d3c8ga1	165	157	34	16	14	7.616	1.133	0.596	0.511	0.542	0.563	0	0	1	1	0	0	a	a.285.1.1	A(1-168)
d3c8wa1	250	228	29	22	20	12.760	0.690	0.563	0.471	0.503	0.529	0	0	1	0	0	0	d	d.347.1.1	A(5-254)
d3c98a_	556	505	42	30	27	34.020	0.737	0.514	0.400	0.544	0.465	0	0	1	0	0	0	e	e.25.1.1	A
d3ccda_	85	85	19	13	12	2.964	0.760	0.574	0.567	0.529	0.580	0	0	1	1	0	0	d	d.94.1.1	A
d3ci0k1	64	64	17	13	12	2.652	0.680	0.587	0.516	0.390	0.554	0	0	1	1	0	0	a	a.60.16.1	K(204-274)
d3ci3a1	187	160	32	16	15	7.680	1.032	0.625	0.525	0.566	0.585	0	0	1	1	0	0	a	a.25.2.0	A(2-188)
d3cima1	89	85	21	17	8	2.856	0.840	0.636	0.551	0.468	0.598	0	0	1	1	0	0	d	d.58.56.1	A(3-91)
d3cjrb1	48	48	17	11	9	1.683	0.850	0.507	0.487	0.551	0.496	0	0	1	0	0	0	a	a.4.7.1	B(71-137)
d3cjsb1	70	69	20	13	10	2.600	0.870	0.623	0.552	0.685	0.599	0	0	1	1	0	0	d	d.47.1.1	B(1-70)
d3cr3a1	192	188	28	18	15	7.560	0.848	0.595	0.556	0.504	0.585	0	0	1	1	0	0	a	a.208.1.1	A(1-192)
d3ct6a1	123	119	22	15	15	4.950	0.733	0.605	0.545	0.700	0.592	0	0	1	1	0	0	c	c.54.1.2	A(1-123)
d3cu9a_	314	304	27	25	21	14.175	0.587	0.601	0.544	0.430	0.589	0	0	1	1	0	0	b	b.67.2.1	A
d3cwca1	368	353	42	21	19	16.758	1.050	0.527	0.467	0.571	0.503	0	0	1	0	0	0	c	c.141.1.0	A(1-380)
d3cx5c1	124	107	36	14	11	5.544	1.440	0.587	0.481	0.615	0.544	0	0	1	0	0	0	f	f.32.1.0	C(262-385)
d3cx5d2	49	37	43	8	4	1.376	3.583	0.665	0.534	0.665	0.608	0	0	1	1	0	1	f	f.23.11.1	D(261-309)
d3cx5e2	56	41	43	8	5	1.720	3.308	0.721	0.491	0.836	0.618	0	0	1	0	0	1	f	f.23.12.1	E(31-86)
d3cx5f_	74	63	30	11	9	2.970	1.500	0.516	0.469	0.489	0.504	0	0	1	0	0	0	f	f.28.1.1	F
d3cx5g_	126	108	27	23	11	6.831	0.794	0.521	0.402	0.447	0.464	0	0	1	0	0	0	f	f.27.1.1	G
d3cx5h_	93	82	53	25	12	15.900	1.432	0.070	0.106	0.076	0.088	1	0	0	0	1	0	f	f.23.13.1	H
d3cx5i_	57	48	37	13	7	3.367	1.850	0.398	0.340	0.500	0.382	0	1	0	0	0	0	f	f.23.14.1	I
d3cy4a_	151	139	24	19	15	6.840	0.706	0.633	0.510	0.479	0.581	0	0	1	1	0	0	b	b.64.1.1	A
d3czza_	101	100	26	13	9	3.042	1.182	0.599	0.602	0.523	0.613	0	0	1	1	1	0	b	b.89.1.1	A
d3d06a_	179	170	25	21	15	7.875	0.694	0.599	0.522	0.540	0.571	0	0	1	1	0	0	b	b.2.5.2	A
d3d36c_	42	40	15	11	9	1.485	0.750	0.641	0.576	0.688	0.615	0	0	1	1	0	0	a	a.2.12.1	C
d3d3ra1	76	64	31	14	11	4.774	1.240	0.208	0.263	0.055	0.238	1	0	0	0	1	0	b	b.40.14.1	A(1-76)
d3db7a1	126	117	25	16	13	5.200	0.862	0.620	0.525	0.706	0.578	0	0	1	1	0	0	d	d.98.2.1	A(20-145)
d3dbya1	121	121	29	15	10	4.350	1.160	0.632	0.599	0.573	0.625	0	0	1	1	0	0	a	a.29.13.1	A(5-125)
d3ddta1	45	41	16	11	8	1.408	0.842	0.670	0.586	0.802	0.643	0	0	1	1	0	0	g	g.43.1.1	A(1-45)
d3dgpb_	63	62	23	12	10	2.760	1.045	0.618	0.490	0.625	0.556	0	0	1	0	0	0	d	d.295.1.0	B
d3dk9a3	115	109	25	16	13	5.200	0.862	0.600	0.481	0.463	0.546	0	0	1	0	0	0	d	d.87.1.1	A(364-478)
d3dkma1	70	67	16	13	11	2.288	0.667	0.665	0.591	0.686	0.631	0	0	1	1	0	0	b	b.34.19.1	A(1273-1342)
d3dnfa_	281	265	39	32	13	16.224	0.867	0.507	0.421	0.265	0.468	0	0	1	0	0	0	c	c.155.1.1	A
d3dnja_	80	77	19	15	12	3.420	0.704	0.606	0.548	0.583	0.590	0	0	1	1	0	0	d	d.45.1.2	A
d3dxra_	69	68	33	16	9	4.752	1.320	0.442	0.325	0.687	0.390	0	1	0	0	0	0	g	g.83.1.0	A
d3e1za_	109	102	22	16	12	4.224	0.786	0.625	0.538	0.509	0.586	0	0	1	1	0	0	b	b.1.26.1	A
d3e4ha_	29	29	12	8	6	0.576	0.857	0.709	0.654	0.867	0.687	0	0	1	1	0	0	g	g.3.3.1	A
d3e9va1	120	111	21	16	13	4.368	0.724	0.581	0.542	0.401	0.573	0	0	1	1	0	0	d	d.370.1.1	A(9-128)
d3ea6a1	84	75	23	13	12	3.588	0.920	0.605	0.482	0.507	0.549	0	0	1	0	0	0	b	b.40.2.0	A(3-86)
d3ea6a2	131	114	26	15	14	5.460	0.897	0.615	0.532	0.621	0.583	0	0	1	1	0	0	d	d.15.6.1	A(87-217)
d3eeqa2	194	194	36	17	16	9.792	1.091	0.518	0.467	0.273	0.502	0	0	1	0	0	0	c	c.152.1.1	A(10-214)
d3eera_	140	122	31	17	13	6.851	1.033	0.510	0.396	0.746	0.469	0	0	1	0	0	0	d	d.227.1.0	A
d3eipa_	84	83	23	14	12	3.864	0.885	0.602	0.523	0.576	0.578	0	0	1	1	0	0	d	d.26.2.1	A
d3eoja_	359	346	40	26	21	21.840	0.851	0.296	0.379	0.021	0.344	1	0	0	0	1	0	b	b.75.1.1	A
d3er9b_	445	420	47	26	20	24.440	1.022	0.513	0.453	0.509	0.493	0	0	1	0	0	0	e	e.69.1.1	B
d3eyea_	153	146	22	18	17	6.732	0.629	0.609	0.523	0.664	0.578	0	0	1	1	0	0	c	c.38.1.0	A
d3f0da_	155	145	25	17	12	5.100	0.862	0.604	0.564	0.767	0.593	0	0	1	1	0	0	d	d.79.5.0	A
d3f0pa2	128	113	22	16	13	4.576	0.759	0.595	0.532	0.580	0.581	0	0	1	1	0	0	d	d.357.1.2	A(81-208)
d3f1la_	245	237	26	21	20	10.920	0.634	0.547	0.505	0.576	0.542	0	0	1	1	0	0	c	c.2.1.0	A
d3f42a1	92	86	39	11	8	3.432	2.053	0.561	0.514	0.630	0.551	0	0	1	1	0	1	d	d.222.1.0	A(1-92)
d3f6ya_	235	217	31	24	16	11.904	0.775	0.559	0.477	0.576	0.534	0	0	1	0	0	0	c	c.23.14.3	A
d3f7la_	151	144	21	18	16	6.048	0.618	0.596	0.524	0.641	0.577	0	0	1	1	0	0	b	b.1.8.1	A
d3faua1	70	69	20	13	11	2.860	0.833	0.602	0.543	0.345	0.579	0	0	1	1	0	0	d	d.68.8.1	A(11-89)
d3fkea_	123	120	23	17	14	5.474	0.742	0.599	0.517	0.722	0.569	0	0	1	1	0	0	d	d.388.1.1	A
d3fmua_	319	303	33	22	19	13.794	0.805	0.573	0.511	0.423	0.551	0	0	1	1	0	0	a	a.93.1.0	A
d3fsoa1	108	108	27	13	11	3.861	1.125	0.598	0.578	0.486	0.596	0	0	1	1	0	0	b	b.1.27.0	A(989-1105)
d3fsta_	286	270	30	24	20	14.400	0.682	0.541	0.467	0.586	0.514	0	0	1	0	0	0	c	c.1.23.1	A
d3ft1a1	97	96	22	15	13	4.290	0.786	0.634	0.548	0.617	0.597	0	0	1	1	0	0	b	b.7.3.0	A(1-97)
d3fx7a1	82	73	38	10	8	3.040	2.111	0.574	0.544	0.350	0.562	0	0	1	1	0	1	a	a.25.5.1	A(5-86)
d3fxka2	68	65	22	13	10	2.860	0.957	0.572	0.485	0.638	0.535	0	0	1	0	0	0	a	a.159.1.0	A(297-368)
d3fyba1	97	86	28	15	13	5.460	1.000	0.504	0.389	0.564	0.457	0	0	1	0	0	0	a	a.293.1.0	A(1-97)
d3fz2a1	128	124	27	16	13	5.616	0.931	0.611	0.521	0.604	0.578	0	0	1	1	0	0	d	d.323.1.1	A(4-134)
d3g21a_	77	77	20	16	10	3.200	0.769	0.608	0.531	0.672	0.583	0	0	1	1	0	0	a	a.28.3.1	A
d3ge3c_	83	78	19	13	11	2.717	0.792	0.582	0.563	0.539	0.580	0	0	1	1	0	0	d	d.15.12.0	C
d3ge3e_	102	94	21	16	11	3.696	0.778	0.600	0.535	0.682	0.579	0	0	1	1	0	0	d	d.137.1.1	E
d3giua_	212	200	23	22	17	8.602	0.590	0.590	0.541	0.671	0.581	0	0	1	1	0	0	c	c.56.4.0	A
d3gj3b_	27	26	11	8	7	0.616	0.733	0.684	0.655	0.506	0.673	0	0	1	1	0	0	g	g.41.11.1	B
d3glaa_	97	92	30	13	10	3.900	1.304	0.645	0.538	0.625	0.599	0	0	1	1	0	0	b	b.15.1.0	A
d3gmxa_	154	145	26	19	11	5.434	0.867	0.601	0.562	0.734	0.588	0	0	1	1	0	0	d	d.98.1.0	A
d3gp6a1	154	136	25	19	15	7.125	0.735	0.564	0.479	0.268	0.526	0	0	1	0	0	0	f	f.4.1.2	A(0-161)
d3h0na_	184	165	27	21	15	8.505	0.750	0.575	0.477	0.696	0.543	0	0	1	0	0	0	d	d.380.1.1	A
d3h1da1	369	328	38	30	20	22.800	0.760	0.528	0.408	0.452	0.474	0	0	1	0	0	0	d	d.148.1.0	A(3993-4366)
d3h43a1	17	17	17	5	4	0.340	1.889	0.838	0.715	0.794	0.783	0	0	1	1	0	0	h	h.1.39.1	A(74-90)
d3h43a2	59	57	14	11	11	1.694	0.636	0.608	0.594	0.588	0.610	0	0	1	1	0	0	b	b.40.17.1	A(91-149)
d3h4ta1	382	366	37	23	20	17.020	0.860	0.507	0.474	0.439	0.495	0	0	1	0	0	0	c	c.87.1.5	A(2-383)
d3h63a_	315	309	30	22	20	13.200	0.714	0.627	0.568	0.625	0.607	0	0	1	1	0	0	d	d.159.1.3	A
d3h7ia1	177	165	30	18	15	8.100	0.909	0.536	0.484	0.698	0.526	0	0	1	0	0	0	c	c.120.1.2	A(4-180)
d3h7ia2	125	108	37	17	16	10.064	1.121	0.162	0.211	0.016	0.183	1	0	0	0	1	0	a	a.60.7.1	A(181-305)
d3h90a1	201	178	35	19	13	8.645	1.094	0.454	0.449	0.472	0.463	0	1	0	0	0	0	f	f.59.1.1	A(8-208)
d3h9va1	51	48	14	11	9	1.386	0.700	0.618	0.520	0.744	0.574	0	0	1	1	0	0	d	d.230.8.1	A(116-167)
d3h9va2	222	188	37	19	14	9.842	1.121	0.589	0.469	0.587	0.537	0	0	1	0	0	0	b	b.184.1.1	A(59-115,168-332)
d3h9va3	56	55	25	10	8	2.000	1.389	0.523	0.488	0.502	0.510	0	0	1	0	0	0	d	d.230.9.1	A(32-58,333-361)
d3hhta_	202	179	34	22	16	11.968	0.895	0.533	0.390	0.572	0.470	0	0	1	0	0	0	d	d.149.1.1	A
d3hhya_	256	243	37	25	17	15.725	0.881	0.545	0.403	0.591	0.483	0	0	1	0	0	0	b	b.3.6.0	A
d3hlxa1	250	230	31	21	20	13.020	0.756	0.572	0.484	0.345	0.534	0	0	1	0	0	0	a	a.132.1.4	A(2-251)
d3hmsa_	91	87	17	16	13	3.536	0.586	0.662	0.570	0.761	0.625	0	0	1	1	0	0	g	g.10.1.1	A
d3hola3	107	83	32	19	8	4.864	1.185	0.580	0.424	0.769	0.519	0	0	1	0	0	0	b	b.181.1.1	A(24-130)
d3hpwa_	101	95	21	16	13	4.368	0.724	0.622	0.530	0.622	0.592	0	0	1	1	0	0	b	b.34.6.1	A
d3i33a1	184	172	29	20	14	8.120	0.853	0.594	0.499	0.478	0.549	0	0	1	0	0	0	c	c.55.1.1	A(6-189)
d3i94a_	243	238	28	23	18	11.592	0.683	0.578	0.518	0.640	0.563	0	0	1	1	0	0	d	d.248.2.1	A
d3iam5_	196	165	30	23	15	10.350	0.789	0.414	0.375	0.543	0.404	0	1	0	0	0	0	d	d.307.1.1	5
d3ieza_	94	93	20	17	11	3.740	0.714	0.583	0.542	0.446	0.567	0	0	1	1	0	0	d	d.332.1.1	A
d3im6a_	175	164	24	19	17	7.752	0.667	0.604	0.511	0.448	0.565	0	0	1	1	0	0	b	b.42.6.2	A
d3imka1	157	152	22	18	16	6.336	0.647	0.583	0.546	0.684	0.582	0	0	1	1	0	0	c	c.129.1.5	A(1-157)
d3ip0a_	158	151	21	20	15	6.300	0.600	0.576	0.538	0.605	0.562	0	0	1	1	0	0	d	d.58.30.1	A
d3ip4c_	92	89	34	28	11	10.472	0.872	0.063	0.148	0.004	0.106	1	0	0	0	1	0	a	a.137.12.1	C
d3ivva1	138	133	26	16	14	5.824	0.867	0.625	0.540	0.588	0.590	0	0	1	1	0	0	b	b.8.1.1	A(28-165)
d3j9tg2	90	88	86	6	5	2.580	7.818	0.708	0.594	0.775	0.662	0	0	1	1	0	1	h	h.1.36.1	G(8-97)
d3j9th_	105	89	93	7	6	3.906	7.154	0.551	0.454	0.651	0.513	0	0	1	0	0	1	h	h.1.37.1	H
d3jb9a5	640	509	47	31	26	37.882	0.825	0.506	0.387	0.546	0.457	0	0	1	0	0	0	d	d.394.1.1	A(47-697)
d3jb9i_	161	137	75	26	9	17.550	2.143	0.039	0.146	0.000	0.103	1	0	0	0	1	1	h	h.1.41.1	i
d3jb9s2	75	60	66	7	6	2.772	5.077	0.626	0.469	0.590	0.556	0	0	1	0	0	1	h	h.1.40.1	S(58-132)
d3jcla3	183	169	41	18	14	10.332	1.281	0.465	0.389	0.420	0.433	0	1	0	0	0	0	e	e.83.1.1	A(285-323,573-716)
d3jqka_	143	132	31	15	11	5.115	1.192	0.632	0.544	0.664	0.597	0	0	1	1	0	0	d	d.58.21.0	A
d3ju4a2	150	143	45	21	17	16.065	1.184	0.204	0.192	0.173	0.206	1	0	0	0	0	0	b	b.108.1.0	A(761-910)
d3jv1a_	182	158	36	18	16	10.368	1.059	0.530	0.392	0.574	0.465	0	0	1	0	0	0	d	d.25.1.0	A
d3k2za2	126	120	23	18	15	6.210	0.697	0.582	0.475	0.587	0.538	0	0	1	0	0	0	b	b.87.1.0	A(72-197)
d3k34a_	258	251	26	22	20	11.440	0.619	0.591	0.528	0.684	0.574	0	0	1	1	0	0	b	b.74.1.1	A
d3k6ia1	98	94	24	13	11	3.432	1.000	0.613	0.550	0.397	0.582	0	0	1	1	0	0	b	b.1.6.0	A(2-99)
d3kdse2	189	161	32	18	15	8.640	0.970	0.579	0.470	0.712	0.535	0	0	1	0	0	0	a	a.269.1.1	E(403-603)
d3kg2a3	140	125	39	21	10	8.190	1.258	0.331	0.306	0.160	0.326	0	1	0	0	0	0	f	f.14.2.1	A(508-632,774-817)
d3ki2a1	194	179	27	21	16	9.072	0.730	0.575	0.480	0.672	0.533	0	0	1	0	0	0	d	d.166.1.0	A(427-628)
d3ku3a1	323	275	54	20	15	16.200	1.543	0.553	0.432	0.615	0.503	0	0	1	0	0	0	b	b.19.1.2	A(10-326)
d3kwda_	166	163	24	20	14	6.720	0.706	0.615	0.547	0.531	0.592	0	0	1	1	0	0	b	b.81.1.0	A
d3kyga1	117	109	24	16	13	4.992	0.828	0.585	0.507	0.491	0.556	0	0	1	1	0	0	b	b.45.2.2	A(21-137)
d3l00a1	69	62	18	16	8	2.304	0.750	0.608	0.553	0.656	0.591	0	0	1	1	0	0	c	c.55.7.0	A(5-91)
d3l00a2	88	88	19	13	11	2.717	0.792	0.640	0.600	0.742	0.626	0	0	1	1	0	0	a	a.4.2.0	A(92-179)
d3l51b1	158	146	29	17	14	6.902	0.935	0.556	0.473	0.580	0.521	0	0	1	0	0	0	d	d.215.1.0	B(595-752)
d3l5oa1	244	237	29	20	18	10.440	0.763	0.561	0.520	0.669	0.555	0	0	1	1	0	0	c	c.67.3.1	A(1-251)
d3l81a_	250	220	44	18	15	11.880	1.333	0.581	0.476	0.543	0.542	0	0	1	0	0	0	b	b.2.7.0	A
d3lasa_	166	136	28	21	16	9.408	0.757	0.482	0.362	0.603	0.439	0	1	0	0	0	0	c	c.53.2.0	A
d3ldqb1	110	109	37	12	10	4.440	1.682	0.603	0.547	0.646	0.581	0	0	1	1	0	0	a	a.7.7.1	B(151-260)
d3llpa1	129	119	18	17	15	4.590	0.562	0.598	0.557	0.426	0.583	0	0	1	1	0	0	b	b.42.5.1	A(7-140)
d3lmna_	132	108	24	18	14	6.048	0.750	0.621	0.480	0.530	0.562	0	0	1	0	0	0	d	d.324.1.1	A
d3lvjc_	77	76	17	14	12	2.856	0.654	0.568	0.559	0.537	0.582	0	0	1	1	0	0	d	d.68.3.3	C
d3lyea_	285	251	27	23	20	12.420	0.628	0.590	0.476	0.656	0.540	0	0	1	0	0	0	c	c.1.12.0	A
d3lzla_	157	149	32	15	14	6.720	1.103	0.617	0.520	0.584	0.578	0	0	1	1	0	0	b	b.1.33.0	A
d3m31a1	352	334	32	25	23	18.400	0.667	0.570	0.478	0.637	0.538	0	0	1	0	0	0	a	a.227.1.1	A(56-424)
d3m4ia_	190	177	34	19	15	9.690	1.000	0.559	0.461	0.568	0.520	0	0	1	0	0	0	e	e.78.1.1	A
d3mhra1	231	208	29	26	17	12.818	0.674	0.532	0.414	0.422	0.478	0	0	1	0	0	0	a	a.118.7.1	A(1-231)
d3mhsb_	91	85	28	16	11	4.928	1.037	0.301	0.367	0.063	0.335	0	1	0	0	1	0	a	a.301.1.1	B
d3mmha_	167	161	22	21	14	6.468	0.629	0.598	0.549	0.647	0.586	0	0	1	1	0	0	d	d.110.2.0	A
d3mwpa2	321	297	32	24	20	15.360	0.727	0.512	0.478	0.382	0.504	0	0	1	0	0	0	a	a.300.1.1	A(7-338)
d3n6wa1	95	91	22	16	10	3.520	0.846	0.618	0.558	0.557	0.595	0	0	1	1	0	0	d	d.392.1.1	A(1-95)
d3ndva_	367	357	35	26	16	14.560	0.833	0.632	0.544	0.582	0.598	0	0	1	1	0	0	d	d.154.1.0	A
d3nfta_	262	249	48	20	12	11.520	1.500	0.591	0.517	0.406	0.564	0	0	1	1	0	0	a	a.250.1.1	A
d3nira_	46	46	15	11	9	1.485	0.750	0.661	0.582	0.422	0.637	0	0	1	1	0	0	g	g.13.1.1	A
d3nkea_	183	176	29	21	13	7.917	0.853	0.587	0.515	0.693	0.557	0	0	1	1	0	0	e	e.79.1.1	A
d3nuhb2	168	161	34	19	13	8.398	1.062	0.547	0.453	0.606	0.508	0	0	1	0	0	0	d	d.385.1.1	B(562-732)
d3nvia_	247	213	43	21	16	14.448	1.162	0.407	0.366	0.259	0.389	0	1	0	0	0	0	a	a.183.1.0	A
d3nvsa_	426	420	35	23	22	17.710	0.778	0.582	0.532	0.337	0.559	0	0	1	1	0	0	d	d.68.2.2	A
d3o4pa_	314	303	25	25	21	13.125	0.543	0.594	0.556	0.524	0.590	0	0	1	1	0	0	b	b.68.6.1	A
d3og2a3	97	84	19	15	14	3.990	0.655	0.598	0.472	0.579	0.545	0	0	1	0	0	0	b	b.149.1.0	A(572-668)
d3omya_	51	42	18	14	9	2.268	0.783	0.502	0.402	0.499	0.461	0	0	1	0	0	0	a	a.55.1.0	A
d3ooia1	231	217	35	23	14	11.270	0.946	0.556	0.467	0.580	0.521	0	0	1	0	0	0	f	f.54.1.2	A(1-231)
d3orsa1	160	142	24	20	14	6.720	0.706	0.624	0.500	0.654	0.569	0	0	1	1	0	0	c	c.23.8.0	A(1-160)
d3osea_	100	97	23	13	12	3.588	0.920	0.625	0.567	0.696	0.608	0	0	1	1	0	0	d	d.129.6.1	A
d3osxa1	186	176	26	19	16	7.904	0.743	0.605	0.510	0.529	0.562	0	0	1	1	0	0	c	c.8.5.1	A(191-376)
d3ov9a_	245	207	29	21	17	10.353	0.763	0.556	0.477	0.674	0.525	0	0	1	0	0	0	a	a.299.1.1	A
d3oxpa1	147	146	19	19	16	5.776	0.543	0.583	0.537	0.682	0.571	0	0	1	1	0	0	d	d.112.1.0	A(1-147)
d3p0ya2	23	22	10	8	6	0.480	0.714	0.653	0.648	0.850	0.661	0	0	1	1	0	0	g	g.3.9.1	A(481-503)
d3p54a1	299	274	69	16	13	14.352	2.379	0.601	0.475	0.625	0.547	0	0	1	0	0	1	f	f.10.1.0	A(1-299)
d3phsa1	120	112	21	17	14	4.998	0.677	0.626	0.522	0.619	0.583	0	0	1	1	0	0	b	b.3.5.1	A(31-150)
d3pkza_	124	120	22	18	15	5.940	0.667	0.584	0.506	0.535	0.557	0	0	1	1	0	0	c	c.53.1.0	A
d3pmea2	193	189	26	21	18	9.828	0.667	0.594	0.509	0.488	0.562	0	0	1	1	0	0	b	b.42.4.0	A(1086-1280)
d3pmsa1	137	126	26	17	11	4.862	0.929	0.610	0.569	0.475	0.596	0	0	1	1	0	0	b	b.121.1.1	A(4-140)
d3ppma_	546	525	35	31	24	26.040	0.636	0.595	0.511	0.699	0.571	0	0	1	1	0	0	c	c.117.1.1	A
d3proc1	80	75	28	12	10	3.360	1.273	0.594	0.495	0.621	0.555	0	0	1	0	0	0	d	d.52.1.1	C(6-85)
d3psma_	47	45	15	12	8	1.440	0.750	0.670	0.593	0.795	0.651	0	0	1	1	0	0	g	g.3.7.5	A
d3pt6a1	50	48	18	12	8	1.728	0.900	0.394	0.441	0.480	0.419	0	1	0	0	1	0	g	g.95.1.1	A(651-700)
d3pzwa1	130	122	24	17	13	5.304	0.800	0.609	0.530	0.549	0.578	0	0	1	1	0	0	b	b.12.1.1	A(6-149)
d3pzwa2	690	657	43	34	26	38.012	0.717	0.568	0.469	0.617	0.529	0	0	1	0	0	0	a	a.119.1.1	A(150-839)
d3q20a_	114	93	29	16	15	6.960	0.935	0.350	0.323	0.597	0.349	0	1	0	0	0	0	a	a.280.1.0	A
d3qm9a_	145	143	22	21	13	6.006	0.647	0.519	0.514	0.253	0.519	0	0	1	1	0	0	a	a.1.1.2	A
d3qpaa_	197	197	25	17	17	7.225	0.735	0.630	0.582	0.665	0.618	0	0	1	1	0	0	c	c.69.1.30	A
d3qq8a2	80	80	22	13	10	2.860	0.957	0.596	0.565	0.517	0.589	0	0	1	1	0	0	d	d.31.1.1	A(107-186)
d3qsvd_	125	121	19	17	16	5.168	0.576	0.597	0.538	0.562	0.575	0	0	1	1	0	0	d	d.164.1.0	D
d3qvea1	128	123	20	17	14	4.760	0.645	0.610	0.550	0.661	0.589	0	0	1	1	0	0	b	b.145.1.0	A(206-342)
d3qzba1	131	112	32	15	12	5.760	1.185	0.606	0.487	0.483	0.553	0	0	1	0	0	0	b	b.1.13.0	A(1-131)
d3qzma1	123	121	27	18	13	6.318	0.871	0.603	0.499	0.380	0.566	0	0	1	0	0	0	b	b.1.28.1	A(62-184)
d3r87a_	132	124	27	15	14	5.670	0.931	0.595	0.507	0.732	0.563	0	0	1	1	0	0	d	d.38.1.0	A
d3r8ja_	180	166	28	20	14	7.840	0.824	0.611	0.525	0.583	0.582	0	0	1	1	0	0	d	d.60.1.0	A
d3rbba_	137	122	38	18	12	8.208	1.267	0.555	0.402	0.683	0.485	0	0	1	0	0	0	d	d.102.1.1	A
d3rf3a1	127	123	31	17	11	5.797	1.107	0.499	0.442	0.640	0.480	0	1	0	0	0	0	a	a.24.9.1	A(2-128)
d3rkoa_	95	88	32	24	6	4.608	1.067	0.495	0.434	0.560	0.477	0	1	0	0	0	0	f	f.73.3.1	A
d3rkoc_	504	494	38	28	23	24.472	0.745	0.580	0.521	0.651	0.568	0	0	1	1	0	0	f	f.72.1.1	C
d3rkog_	100	87	31	15	6	2.790	1.476	0.627	0.589	0.760	0.621	0	0	1	1	0	0	f	f.73.1.1	G
d3rkoj_	168	157	32	26	17	14.144	0.744	0.156	0.222	0.041	0.189	1	0	0	0	1	0	f	f.73.2.1	J
d3rlff1	247	230	50	32	14	22.400	1.087	0.191	0.225	0.082	0.210	1	0	0	0	1	0	e	e.70.1.1	F(10-260)
d3rlff2	243	213	39	23	15	13.455	1.026	0.579	0.417	0.595	0.504	0	0	1	0	0	0	f	f.58.1.1	F(261-503)
d3rq7a1	125	122	34	18	14	8.568	1.062	0.266	0.296	0.196	0.283	1	0	0	0	1	0	d	d.223.1.2	A(373-500)
d3rssa1	211	204	25	21	17	8.925	0.658	0.570	0.515	0.583	0.555	0	0	1	1	0	0	c	c.104.1.1	A(1-211)
d3rvca_	118	112	23	15	13	4.485	0.821	0.617	0.535	0.704	0.590	0	0	1	1	0	0	d	d.299.1.1	A
d3ryce1	135	95	95	8	6	4.560	6.786	0.456	0.413	0.466	0.445	0	1	0	0	0	1	a	a.137.10.1	E(5-145)
d3s2ra_	64	61	21	16	8	2.688	0.875	0.613	0.473	0.706	0.554	0	0	1	0	0	0	g	g.97.1.0	A
d3s4ea1	142	137	24	17	14	5.712	0.774	0.628	0.577	0.594	0.619	0	0	1	1	0	0	c	c.45.1.0	A(65-206)
d3s8gc_	31	30	28	5	4	0.560	3.111	0.807	0.733	0.912	0.786	0	0	1	1	0	1	f	f.23.9.1	C
d3sila_	379	369	30	25	23	17.250	0.625	0.591	0.526	0.618	0.570	0	0	1	1	0	0	b	b.68.1.1	A
d3sjld_	376	339	31	27	19	15.903	0.674	0.570	0.530	0.347	0.562	0	0	1	1	0	0	b	b.69.2.0	D
d3sk7a1	105	102	22	15	12	3.960	0.815	0.616	0.566	0.633	0.604	0	0	1	1	0	0	d	d.228.1.1	A(69-177)
d3sqza1	167	156	33	16	13	6.864	1.138	0.475	0.456	0.521	0.476	0	1	0	0	0	0	c	c.95.1.0	A(1-167)
d3ssaa1	55	55	16	12	10	1.920	0.727	0.624	0.567	0.527	0.599	0	0	1	1	0	0	b	b.49.1.0	A(12-75)
d3sxua_	146	142	21	19	15	5.985	0.618	0.596	0.539	0.560	0.576	0	0	1	1	0	0	c	c.128.1.1	A
d3szva1	355	333	33	27	24	21.384	0.647	0.360	0.372	0.402	0.378	0	1	0	0	1	0	f	f.4.7.2	A(1-384)
d3t0ha_	209	195	25	22	19	10.450	0.610	0.576	0.482	0.407	0.537	0	0	1	0	0	0	d	d.122.1.1	A
d3t2ca_	389	353	29	28	21	17.052	0.592	0.601	0.517	0.596	0.573	0	0	1	1	0	0	d	d.280.1.1	A
d3t3la_	121	118	24	15	13	4.680	0.857	0.602	0.566	0.473	0.592	0	0	1	1	0	0	d	d.82.2.1	A
d3t6eh1	36	32	32	6	5	0.960	2.909	0.798	0.614	0.828	0.718	0	0	1	1	0	1	f	f.23.10.1	H(1-36)
d3t6eh2	222	202	35	25	13	11.375	0.921	0.400	0.382	0.480	0.403	0	1	0	0	0	0	b	b.41.1.1	H(37-258)
d3t6el_	273	235	37	33	15	18.315	0.771	0.396	0.331	0.371	0.367	0	1	0	0	0	0	f	f.26.1.1	L
d3t7la_	74	70	20	12	11	2.640	0.870	0.683	0.573	0.761	0.644	0	0	1	1	0	0	g	g.50.1.0	A
d3tewa1	490	441	46	32	20	29.440	0.885	0.495	0.396	0.352	0.453	0	1	0	0	0	0	f	f.60.1.1	A(226-735)
d3tg0a_	440	409	34	27	22	20.196	0.694	0.584	0.469	0.636	0.534	0	0	1	0	0	0	c	c.76.1.1	A
d3tg2a_	205	197	24	20	18	8.640	0.632	0.602	0.547	0.612	0.592	0	0	1	1	0	0	c	c.33.1.0	A
d3tg7a1	579	467	60	31	24	44.640	1.091	0.394	0.282	0.597	0.349	1	0	0	0	0	0	b	b.121.2.2	A(7-636)
d3tkka1	299	280	32	24	18	13.824	0.762	0.608	0.490	0.526	0.558	0	0	1	0	0	0	b	b.23.3.0	A(1-299)
d3tvji_	35	32	17	8	6	0.816	1.214	0.577	0.558	0.481	0.569	0	0	1	1	0	0	g	g.4.1.1	I
d3u1la1	119	110	22	19	13	5.434	0.688	0.591	0.477	0.774	0.543	0	0	1	0	0	0	g	g.66.1.2	A(3-121)
d3u1ua_	131	128	25	17	13	5.525	0.833	0.598	0.536	0.663	0.583	0	0	1	1	0	0	b	b.34.21.1	A
d3u3ha_	386	333	35	27	20	18.900	0.745	0.592	0.458	0.664	0.535	0	0	1	0	0	0	c	c.1.15.3	A
d3u9wa1	206	199	29	20	17	9.860	0.784	0.595	0.496	0.563	0.550	0	0	1	0	0	0	b	b.98.1.1	A(1003-1208)
d3ui4a1	96	95	18	16	12	3.456	0.643	0.623	0.594	0.596	0.629	0	0	1	1	0	0	d	d.26.1.1	A(36-131)
d3ulja_	87	80	18	15	11	2.970	0.692	0.657	0.578	0.592	0.622	0	0	1	1	0	0	b	b.40.4.0	A
d3umha_	180	171	53	16	11	9.328	1.963	0.453	0.424	0.520	0.448	0	1	0	0	0	0	a	a.47.4.1	A
d3uqza1	71	68	19	15	11	3.135	0.731	0.629	0.516	0.659	0.577	0	0	1	1	0	0	a	a.60.17.1	A(1-71)
d3v5wg_	57	55	41	18	6	4.428	1.708	0.150	0.206	0.002	0.175	1	0	0	0	1	0	a	a.137.3.1	G
d3v6ta_	491	453	39	35	27	36.855	0.629	0.268	0.286	0.030	0.276	1	0	0	0	1	0	a	a.298.1.1	A
d3v7ba_	147	144	22	18	15	5.940	0.667	0.591	0.542	0.665	0.579	0	0	1	1	0	0	d	d.107.1.4	A
d3vb9a_	460	414	38	29	20	22.040	0.776	0.610	0.494	0.606	0.561	0	0	1	0	0	0	e	e.65.1.1	A
d3vdpa_	197	171	37	22	18	14.652	0.925	0.301	0.281	0.297	0.297	1	0	0	0	0	0	e	e.49.1.1	A
d3vhva1	253	238	29	22	17	10.846	0.744	0.563	0.531	0.710	0.563	0	0	1	1	0	0	a	a.123.1.1	A(727-984)
d3vrna1	117	116	29	14	12	4.872	1.115	0.587	0.510	0.544	0.555	0	0	1	1	0	0	a	a.48.1.0	A(12-147)
d3vxva_	65	56	31	13	7	2.821	1.550	0.498	0.412	0.708	0.465	0	1	0	0	0	0	d	d.10.1.0	A
d3vypa2	157	142	22	18	16	6.336	0.647	0.560	0.502	0.575	0.543	0	0	1	1	0	0	b	b.160.1.1	A(252-408)
d3w07a_	215	209	26	22	15	8.580	0.703	0.589	0.548	0.496	0.583	0	0	1	1	0	0	c	c.1.2.3	A
d3w2wa2	78	76	17	15	12	3.060	0.630	0.588	0.538	0.446	0.578	0	0	1	1	0	0	a	a.24.30.1	A(504-592)
d3w5ha1	125	111	28	15	13	5.460	1.000	0.617	0.510	0.541	0.573	0	0	1	1	0	0	b	b.43.4.2	A(1001-1125)
d3w5ha2	147	136	24	19	13	5.928	0.750	0.612	0.548	0.725	0.594	0	0	1	1	0	0	c	c.25.1.1	A(1126-1272)
d3wcqa_	97	96	18	15	13	3.510	0.643	0.590	0.558	0.526	0.586	0	0	1	1	0	0	d	d.15.4.1	A
d3wdna_	125	119	21	20	12	5.040	0.656	0.586	0.535	0.518	0.577	0	0	1	1	0	0	b	b.84.1.0	A
d3weoa4	127	115	27	14	14	5.292	0.964	0.597	0.517	0.606	0.565	0	0	1	1	0	0	b	b.150.1.1	A(757-909)
d3wlia2	214	200	26	21	18	9.828	0.667	0.593	0.484	0.670	0.548	0	0	1	0	0	0	c	c.23.11.0	A(389-602)
d3wtsb_	130	117	26	16	12	4.992	0.929	0.600	0.540	0.607	0.577	0	0	1	1	0	0	b	b.54.1.1	B
d3x0ia_	159	143	27	19	15	7.695	0.794	0.505	0.444	0.417	0.482	0	0	1	0	0	0	d	d.113.1.1	A
d3x34a_	87	86	19	17	13	4.199	0.633	0.562	0.508	0.608	0.556	0	0	1	1	0	0	d	d.120.1.1	A
d3ze3a_	116	96	33	17	9	5.049	1.269	0.550	0.447	0.545	0.510	0	0	1	0	0	0	f	f.62.1.1	A
d3zhoa_	194	186	23	22	15	7.590	0.622	0.612	0.537	0.687	0.588	0	0	1	1	0	0	c	c.23.5.8	A
d3ziwa1	162	146	39	16	12	7.488	1.393	0.622	0.488	0.576	0.570	0	0	1	0	0	0	f	f.8.1.3	A(38-199)
d3zqua_	207	191	23	21	19	9.177	0.575	0.606	0.501	0.601	0.566	0	0	1	1	0	0	c	c.34.1.0	A
d3zqxa1	145	143	24	17	14	5.712	0.774	0.626	0.579	0.530	0.614	0	0	1	1	0	0	b	b.2.2.0	A(1-145)
d3zzsa_	65	61	19	14	9	2.394	0.826	0.548	0.515	0.498	0.535	0	0	1	1	0	0	b	b.82.5.1	A
d4a02a_	166	166	21	19	16	6.384	0.600	0.610	0.567	0.665	0.601	0	0	1	1	0	0	b	b.1.18.0	A
d4a2va_	122	113	21	19	14	5.586	0.636	0.619	0.525	0.524	0.587	0	0	1	1	0	0	b	b.88.2.0	A
d4a5sa1	469	419	36	33	23	27.324	0.643	0.405	0.407	0.083	0.407	0	1	0	0	1	0	b	b.70.3.1	A(40-508)
d4a8ta1	147	138	27	17	15	6.885	0.844	0.459	0.462	0.535	0.476	0	1	0	0	1	0	c	c.78.1.0	A(1-148)
d4a8ua_	159	153	27	19	15	7.695	0.794	0.496	0.484	0.249	0.499	0	1	0	0	0	0	d	d.129.3.1	A
d4adya2	304	274	57	17	15	14.535	1.781	0.594	0.474	0.615	0.540	0	0	1	0	0	0	a	a.118.28.1	A(4-308)
d4adya3	100	89	22	16	13	4.576	0.759	0.595	0.478	0.625	0.543	0	0	1	0	0	0	b	b.3.8.1	A(754-925)
d4af1a1	138	127	24	19	12	5.472	0.774	0.598	0.543	0.672	0.589	0	0	1	1	0	0	d	d.91.1.0	A(7-144)
d4affa1	106	92	24	15	12	4.320	0.889	0.551	0.452	0.537	0.508	0	0	1	0	0	0	d	d.58.5.1	A(1-112)
d4agha_	80	75	27	19	10	5.130	0.931	0.411	0.335	0.537	0.380	0	1	0	0	0	0	d	d.18.1.0	A
d4al0a_	146	124	34	14	11	5.236	1.360	0.600	0.529	0.624	0.579	0	0	1	1	0	0	f	f.56.1.0	A
d4am1a1	94	88	19	15	11	3.135	0.731	0.626	0.567	0.621	0.602	0	0	1	1	0	0	a	a.83.1.0	A(2-95)
d4am1a2	250	236	32	20	19	12.160	0.821	0.537	0.488	0.668	0.530	0	0	1	0	0	0	d	d.128.1.2	A(96-356)
d4an8a_	468	429	44	31	20	27.280	0.863	0.527	0.420	0.586	0.486	0	0	1	0	0	0	e	e.81.1.1	A
d4atma_	221	214	70	15	10	10.500	2.800	0.578	0.493	0.605	0.546	0	0	1	0	0	1	a	a.238.1.0	A
d4au1a_	208	189	27	18	16	7.776	0.794	0.628	0.544	0.601	0.597	0	0	1	1	0	0	c	c.23.17.1	A
d4axoa_	126	120	26	16	14	5.824	0.867	0.552	0.479	0.715	0.532	0	0	1	0	0	0	b	b.82.1.0	A
d4ay0a1	104	94	26	13	11	3.718	1.083	0.569	0.522	0.539	0.554	0	0	1	1	0	0	b	b.1.11.0	A(13-130)
d4ay0a2	84	84	21	13	10	2.730	0.913	0.615	0.586	0.530	0.604	0	0	1	1	0	0	b	b.7.2.0	A(131-217)
d4b0ha_	130	108	24	16	12	4.608	0.857	0.610	0.550	0.553	0.586	0	0	1	1	0	0	b	b.85.4.0	A
d4b4ua1	121	107	26	16	11	4.576	0.963	0.508	0.481	0.528	0.503	0	0	1	0	0	0	c	c.58.1.0	A(1-121)
d4bcda1	430	370	36	31	25	27.900	0.643	0.368	0.359	0.036	0.363	0	1	0	0	0	0	b	b.69.7.1	A(1-430)
d4bcta_	201	187	24	21	15	7.560	0.667	0.634	0.547	0.626	0.603	0	0	1	1	0	0	b	b.25.1.1	A
d4bt7a_	236	235	27	21	18	10.206	0.692	0.577	0.547	0.574	0.577	0	0	1	1	0	0	d	d.290.1.0	A
d4c3hd_	59	54	23	19	9	3.933	0.821	0.227	0.268	0.076	0.253	1	0	0	0	1	0	g	g.98.1.1	D
d4cdpa1	331	319	35	23	21	16.905	0.795	0.540	0.466	0.641	0.515	0	0	1	0	0	0	e	e.62.1.1	A(1-337)
d4cr2x_	127	127	23	18	15	6.210	0.697	0.557	0.490	0.512	0.531	0	0	1	0	0	0	b	b.55.3.1	X
d4cvka1	99	92	18	15	13	3.510	0.643	0.590	0.545	0.663	0.579	0	0	1	1	0	0	c	c.98.1.0	A(1-100)
d4cz5a_	29	26	19	11	5	1.045	1.188	0.509	0.463	0.491	0.492	0	0	1	0	0	0	a	a.53.1.0	A
d4d6ga2	165	147	38	16	14	8.512	1.267	0.510	0.429	0.547	0.477	0	0	1	0	0	0	b	b.24.2.0	A(839-1003)
d4dnda_	95	91	32	11	10	3.520	1.524	0.585	0.548	0.465	0.570	0	0	1	1	0	0	a	a.47.2.1	A
d4doia_	221	204	27	20	18	9.720	0.711	0.600	0.516	0.509	0.570	0	0	1	1	0	0	d	d.36.1.0	A
d4dqqa2	408	392	37	33	22	26.862	0.673	0.370	0.369	0.124	0.374	0	1	0	0	0	0	e	e.8.1.1	A(469-876)
d4drib1	88	88	23	15	12	4.140	0.852	0.596	0.513	0.585	0.566	0	0	1	1	0	0	a	a.24.7.1	B(2025-2112)
d4duia1	157	153	31	16	12	5.952	1.107	0.608	0.559	0.656	0.601	0	0	1	1	0	0	d	d.211.1.1	A(13-169)
d4dwra1	480	462	34	28	23	21.896	0.667	0.597	0.532	0.670	0.579	0	0	1	1	0	0	d	d.261.1.1	A(2-481)
d4dxha1	198	176	24	19	18	8.208	0.649	0.600	0.513	0.714	0.568	0	0	1	1	0	0	b	b.35.1.2	A(1-163,340-374)
d4dyna_	437	393	41	27	22	24.354	0.837	0.520	0.414	0.504	0.480	0	0	1	0	0	0	e	e.75.1.1	A
d4e29a_	233	212	69	13	11	9.867	2.875	0.526	0.455	0.511	0.498	0	0	1	0	0	1	d	d.58.60.1	A
d4e3xa1	541	487	37	29	24	25.752	0.698	0.550	0.470	0.471	0.516	0	0	1	0	0	0	c	c.82.1.0	A(22-562)
d4e3ya_	240	237	28	20	19	10.640	0.718	0.606	0.536	0.646	0.586	0	0	1	1	0	0	d	d.4.1.2	A
d4eada1	69	62	16	14	10	2.240	0.667	0.561	0.554	0.209	0.563	0	0	1	1	0	0	a	a.46.2.1	A(2-70)
d4eada2	265	254	27	22	20	11.880	0.643	0.567	0.503	0.550	0.551	0	0	1	1	0	0	c	c.27.1.1	A(71-335)
d4eada3	105	89	24	14	10	3.360	1.000	0.602	0.542	0.553	0.581	0	0	1	1	0	0	d	d.41.3.1	A(336-440)
d4egua1	116	105	22	17	14	5.236	0.710	0.588	0.482	0.690	0.551	0	0	1	0	0	0	d	d.13.1.0	A(4-119)
d4elya_	135	122	27	16	13	5.616	0.931	0.577	0.513	0.730	0.564	0	0	1	1	0	0	e	e.11.1.1	A
d4emta1	174	158	27	20	14	7.560	0.794	0.593	0.508	0.634	0.563	0	0	1	1	0	0	d	d.387.1.1	A(155-337)
d4enea_	444	391	33	29	21	20.097	0.660	0.590	0.484	0.657	0.549	0	0	1	0	0	0	f	f.20.1.1	A
d4eo7a1	140	135	21	19	17	6.783	0.583	0.589	0.517	0.656	0.569	0	0	1	1	0	0	c	c.23.2.0	A(157-296)
d4eqpa_	129	124	22	17	14	5.236	0.710	0.630	0.553	0.508	0.598	0	0	1	1	0	0	b	b.40.1.1	A
d4etna1	147	144	21	18	16	6.048	0.618	0.633	0.553	0.657	0.608	0	0	1	1	0	0	c	c.44.1.0	A(1-147)
d4ez8a_	287	281	28	26	19	13.832	0.622	0.561	0.499	0.466	0.540	0	0	1	0	0	0	d	d.117.1.1	A
d4f01a1	118	111	24	15	11	3.960	0.923	0.575	0.528	0.647	0.556	0	0	1	1	0	0	b	b.130.1.1	A(389-506)
d4f01a2	96	81	35	12	9	3.780	1.667	0.653	0.498	0.618	0.582	0	0	1	0	0	0	a	a.8.4.1	A(507-602)
d4f19a1	370	356	35	21	20	14.700	0.854	0.601	0.537	0.587	0.578	0	0	1	1	0	0	c	c.94.1.1	A(1001-1370)
d4fhrb1	206	191	42	17	15	10.710	1.312	0.528	0.451	0.676	0.504	0	0	1	0	0	0	a	a.118.14.1	B(115-327)
d4fkda1	50	50	16	11	10	1.760	0.762	0.655	0.582	0.670	0.637	0	0	1	1	0	0	g	g.49.1.1	A(10-59)
d4fvya_	407	384	38	31	19	22.382	0.760	0.529	0.456	0.300	0.499	0	0	1	0	0	0	d	d.174.1.1	A
d4fywb1	91	88	20	16	13	4.160	0.690	0.568	0.492	0.663	0.538	0	0	1	0	0	0	d	d.58.2.1	B(10-100)
d4fywb2	53	50	18	11	9	1.782	0.900	0.621	0.572	0.650	0.603	0	0	1	1	0	0	g	g.41.7.1	B(101-153)
d4g0xa1	146	139	21	18	16	6.048	0.618	0.588	0.513	0.673	0.562	0	0	1	1	0	0	c	c.44.3.0	A(2-147)
d4g26a2	89	84	25	17	9	3.825	0.962	0.579	0.492	0.477	0.551	0	0	1	0	0	0	g	g.103.1.1	A(300-352,535-570)
d4g3na_	302	290	30	27	19	15.390	0.652	0.490	0.463	0.190	0.481	0	1	0	0	0	0	b	b.68.10.0	A
d4g78a1	144	134	34	14	13	6.188	1.259	0.609	0.517	0.561	0.567	0	0	1	1	0	0	a	a.24.10.0	A(1-144)
d4gh0a_	200	196	32	21	16	10.752	0.865	0.521	0.475	0.637	0.513	0	0	1	0	0	0	a	a.224.1.1	A
d4gmua1	257	229	27	23	19	11.799	0.643	0.617	0.488	0.600	0.563	0	0	1	0	0	0	c	c.109.1.1	A(3-259)
d4gmua2	353	324	33	25	23	18.975	0.688	0.568	0.457	0.657	0.525	0	0	1	0	0	0	c	c.91.1.1	A(260-622)
d4gq4a1	209	196	30	21	17	10.710	0.789	0.530	0.447	0.609	0.499	0	0	1	0	0	0	d	d.389.1.1	A(2-230)
d4gq4a2	260	229	35	23	16	12.880	0.897	0.579	0.467	0.590	0.534	0	0	1	0	0	0	a	a.118.8.1	A(231-588)
d4gt9a1	213	190	40	20	13	10.400	1.212	0.647	0.511	0.550	0.586	0	0	1	1	0	0	d	d.207.1.1	A(1-216)
d4gv2a1	141	122	40	13	13	6.760	1.538	0.578	0.467	0.615	0.539	0	0	1	0	0	0	a	a.41.1.0	A(178-321)
d4gvqa_	315	296	31	23	18	12.834	0.756	0.603	0.541	0.636	0.579	0	0	1	1	0	0	d	d.147.1.0	A
d4gwba_	164	158	23	18	17	7.038	0.657	0.629	0.548	0.581	0.595	0	0	1	1	0	0	d	d.58.28.1	A
d4h27a_	318	310	31	23	20	14.260	0.721	0.575	0.506	0.626	0.548	0	0	1	1	0	0	c	c.79.1.1	A
d4h8ea_	235	211	25	23	20	11.500	0.581	0.572	0.483	0.666	0.543	0	0	1	0	0	0	c	c.101.1.1	A
d4hdra_	335	310	31	22	20	13.640	0.738	0.608	0.532	0.534	0.584	0	0	1	1	0	0	c	c.39.1.0	A
d4heia_	92	92	26	14	11	4.004	1.040	0.577	0.540	0.416	0.572	0	0	1	1	0	0	d	d.204.1.0	A
d4hlsa_	97	93	21	17	12	4.284	0.724	0.656	0.528	0.740	0.598	0	0	1	1	0	0	d	d.6.1.1	A
d4hs1a1	78	75	19	13	11	2.717	0.792	0.598	0.542	0.586	0.581	0	0	1	1	0	0	c	c.47.1.1	A(2-79)
d4htga2	80	69	21	12	10	2.520	0.955	0.645	0.562	0.704	0.612	0	0	1	1	0	0	d	d.50.2.0	A(232-311)
d4hwsa2	110	110	20	16	13	4.160	0.690	0.607	0.571	0.613	0.603	0	0	1	1	0	0	c	c.51.1.0	A(533-642)
d4i0ua2	64	59	30	15	6	2.700	1.429	0.637	0.497	0.622	0.574	0	0	1	0	0	0	f	f.17.3.1	A(286-349)
d4i6ya1	264	244	32	22	17	11.968	0.821	0.616	0.489	0.651	0.559	0	0	1	0	0	0	d	d.179.1.1	A(3-110,221-376)
d4i6ya2	110	105	22	14	11	3.388	0.880	0.617	0.578	0.546	0.596	0	0	1	1	0	0	d	d.58.20.1	A(111-220)
d4i71a1	322	317	28	24	20	13.440	0.636	0.606	0.556	0.653	0.595	0	0	1	1	0	0	c	c.70.1.1	A(1-327)
d4i8ha_	223	222	25	22	16	8.800	0.658	0.612	0.551	0.650	0.593	0	0	1	1	0	0	b	b.47.1.2	A
d4i9oa_	78	77	26	13	9	3.042	1.182	0.594	0.510	0.564	0.563	0	0	1	1	0	0	a	a.12.1.1	A
d4iaua_	161	157	28	16	12	5.376	1.000	0.622	0.598	0.581	0.623	0	0	1	1	0	0	b	b.11.1.0	A
d4icgc_	67	64	18	13	11	2.574	0.750	0.608	0.515	0.648	0.571	0	0	1	1	0	0	a	a.23.5.1	C
d4ikva_	492	441	35	31	23	24.955	0.648	0.494	0.446	0.209	0.477	0	1	0	0	0	0	f	f.38.1.3	A
d4inwa_	140	139	22	18	16	6.336	0.647	0.527	0.525	0.171	0.529	0	0	1	1	0	0	a	a.39.2.1	A
d4iuja_	408	375	41	27	20	22.140	0.872	0.548	0.435	0.636	0.501	0	0	1	0	0	0	e	e.77.1.1	A
d4ixna2	95	93	21	13	13	3.549	0.808	0.590	0.546	0.679	0.579	0	0	1	1	0	0	d	d.237.1.1	A(224-318)
d4iyaa_	283	270	46	19	15	13.110	1.353	0.642	0.531	0.573	0.598	0	0	1	1	0	0	f	f.6.1.0	A
d4j42a_	80	70	35	13	9	4.095	1.591	0.412	0.368	0.291	0.395	0	1	0	0	0	0	a	a.25.3.0	A
d4j9yb1	84	68	39	10	9	3.510	2.053	0.580	0.456	0.674	0.523	0	0	1	0	0	1	f	f.15.1.1	B(396-487)
d4jbua1	273	249	49	21	14	14.406	1.400	0.556	0.432	0.597	0.503	0	0	1	0	0	0	e	e.46.1.1	A(28-319)
d4jcca_	284	281	36	23	16	13.248	0.923	0.540	0.496	0.343	0.524	0	0	1	0	0	0	c	c.92.2.0	A
d4jera_	181	168	27	19	15	7.695	0.794	0.605	0.517	0.535	0.569	0	0	1	1	0	0	d	d.35.1.0	A
d4jk8a_	220	201	32	21	16	10.752	0.865	0.614	0.488	0.574	0.556	0	0	1	0	0	0	c	c.55.3.14	A
d4jw0a_	95	90	26	13	11	3.718	1.083	0.607	0.509	0.499	0.566	0	0	1	1	0	0	b	b.40.15.1	A
d4jxqa_	185	173	26	19	17	8.398	0.722	0.533	0.472	0.594	0.519	0	0	1	0	0	0	d	d.108.1.0	A
d4k8ga1	111	93	21	16	12	4.032	0.750	0.601	0.533	0.662	0.578	0	0	1	1	0	0	d	d.54.1.0	A(1-111)
d4k8ga2	274	245	30	23	19	13.110	0.714	0.552	0.477	0.553	0.534	0	0	1	0	0	0	c	c.1.11.0	A(112-402)
d4kefa1	132	127	22	17	13	4.862	0.733	0.629	0.571	0.700	0.611	0	0	1	1	0	0	d	d.109.1.2	A(2-139)
d4kfna1	147	135	30	16	14	6.720	1.000	0.561	0.486	0.659	0.536	0	0	1	0	0	0	d	d.41.2.0	A(8-163)
d4kfna2	326	300	48	23	18	19.872	1.171	0.455	0.384	0.590	0.435	0	1	0	0	0	0	c	c.1.17.2	A(164-489)
d4krea1	373	333	48	31	15	22.320	1.043	0.489	0.400	0.333	0.451	0	1	0	0	0	0	b	b.34.14.0	A(18-410)
d4kuia_	202	186	35	19	16	10.640	1.000	0.597	0.478	0.724	0.552	0	0	1	0	0	0	b	b.34.12.0	A
d4l9pa_	335	296	48	24	18	20.736	1.143	0.403	0.368	0.360	0.396	0	1	0	0	0	0	a	a.118.6.0	A
d4ld8a1	150	137	28	16	14	6.272	0.933	0.596	0.522	0.499	0.567	0	0	1	1	0	0	b	b.31.1.1	A(44-193)
d4lrsa2	52	51	16	11	9	1.584	0.800	0.620	0.588	0.603	0.612	0	0	1	1	0	0	a	a.5.7.0	A(295-346)
d4lwua_	85	82	21	13	12	3.276	0.840	0.560	0.541	0.576	0.558	0	0	1	1	0	0	a	a.42.1.1	A
d4maka_	73	67	20	12	11	2.640	0.870	0.614	0.564	0.507	0.600	0	0	1	1	0	0	d	d.58.58.1	A
d4mf5a2	131	113	28	14	14	5.488	1.000	0.624	0.525	0.530	0.588	0	0	1	1	0	0	a	a.45.1.0	A(104-234)
d4n2ka2	164	150	27	18	16	7.776	0.794	0.614	0.472	0.628	0.548	0	0	1	0	0	0	b	b.2.9.0	A(116-294)
d4n7fa1	33	31	16	10	7	1.120	0.941	0.652	0.543	0.801	0.602	0	0	1	1	0	0	b	b.72.1.0	A(422-454)
d4n7ta2	119	119	22	15	14	4.620	0.759	0.600	0.583	0.673	0.601	0	0	1	1	0	0	d	d.327.1.1	A(108-226)
d4n9sa1	136	128	37	14	12	6.216	1.423	0.601	0.544	0.478	0.585	0	0	1	1	0	0	d	d.96.1.4	A(1-136)
d4npda_	58	58	24	12	9	2.592	1.143	0.633	0.520	0.612	0.585	0	0	1	1	0	0	a	a.8.1.1	A
d4o5ja_	370	307	50	21	16	16.800	1.351	0.589	0.465	0.617	0.540	0	0	1	0	0	0	f	f.70.1.1	A
d4ogqf_	32	32	31	6	4	0.744	3.100	0.830	0.673	0.825	0.760	0	0	1	1	0	1	f	f.23.25.1	F
d4ogqh_	29	28	27	6	4	0.648	2.700	0.834	0.674	0.756	0.754	0	0	1	1	0	1	f	f.23.27.1	H
d4oo8a3	649	579	61	35	24	51.240	1.034	0.346	0.298	0.196	0.325	1	0	0	0	0	0	d	d.393.1.1	A(59-713)
d4oo8a4	258	207	42	20	16	13.440	1.167	0.510	0.386	0.610	0.459	0	0	1	0	0	0	e	e.80.1.1	A(1103-1366)
d4ooxa1	306	278	35	20	18	12.600	0.921	0.609	0.526	0.541	0.578	0	0	1	1	0	0	b	b.121.4.0	A(225-530)
d4oq9a_	144	122	30	16	12	5.760	1.071	0.615	0.516	0.460	0.576	0	0	1	1	0	0	b	b.121.7.1	A
d4p1ma_	106	87	56	17	9	8.568	2.154	0.332	0.259	0.232	0.296	1	0	0	0	0	1	d	d.244.1.0	A
d4p3aa1	68	66	19	16	8	2.432	0.792	0.656	0.574	0.674	0.634	0	0	1	1	0	0	a	a.50.1.1	A(679-746)
d4p79a1	177	150	38	13	12	5.928	1.520	0.622	0.556	0.482	0.597	0	0	1	1	0	0	f	f.63.1.1	A(2-186)
d4pqda_	105	94	21	15	15	4.725	0.700	0.636	0.492	0.689	0.575	0	0	1	0	0	0	d	d.170.2.1	A
d4ps6a1	129	120	24	17	13	5.304	0.800	0.598	0.524	0.744	0.575	0	0	1	1	0	0	d	d.233.1.1	A(25-153)
d4psya_	159	152	27	18	15	7.290	0.818	0.570	0.507	0.618	0.549	0	0	1	1	0	0	c	c.71.1.1	A
d4pv1e_	28	28	26	5	4	0.520	2.889	0.858	0.747	0.868	0.814	0	0	1	1	0	1	f	f.23.24.1	E
d4pv1g_	37	31	33	5	4	0.660	3.667	0.829	0.699	0.829	0.780	0	0	1	1	0	1	f	f.23.26.1	G
d4qa8a_	210	197	29	21	15	9.135	0.806	0.556	0.490	0.277	0.528	0	0	1	0	0	0	b	b.125.1.0	A
d4qb0a_	95	90	27	15	11	4.455	1.038	0.659	0.519	0.515	0.597	0	0	1	1	0	0	d	d.399.1.1	A
d4qi3a1	207	203	23	19	18	7.866	0.622	0.613	0.551	0.444	0.585	0	0	1	1	0	0	b	b.1.9.0	A(2-208)
d4qmea3	101	94	31	12	10	3.720	1.409	0.576	0.533	0.311	0.555	0	0	1	1	0	0	b	b.1.30.1	A(439-539)
d4qqwa4	122	110	22	20	13	5.720	0.667	0.579	0.473	0.647	0.540	0	0	1	0	0	0	d	d.401.1.1	A(823-944)
d4r5ra_	68	59	22	12	8	2.112	1.100	0.623	0.533	0.588	0.593	0	0	1	1	0	0	g	g.20.1.1	A
d4rd4a2	114	96	18	17	12	3.672	0.621	0.612	0.558	0.440	0.591	0	0	1	1	0	0	b	b.43.3.0	A(207-320)
d4rd4a3	95	92	25	14	11	3.850	1.000	0.573	0.512	0.480	0.551	0	0	1	1	0	0	b	b.44.1.0	A(321-415)
d4rgda_	70	69	16	14	11	2.464	0.640	0.594	0.577	0.510	0.595	0	0	1	1	0	0	a	a.64.2.1	A
d4rj2a_	237	230	26	22	17	9.724	0.667	0.599	0.530	0.661	0.577	0	0	1	1	0	0	c	c.56.2.1	A
d4rwua_	81	75	21	15	10	3.150	0.840	0.641	0.543	0.714	0.602	0	0	1	1	0	0	a	a.2.3.0	A
d4rz9a_	179	168	23	20	17	7.820	0.622	0.603	0.534	0.512	0.583	0	0	1	1	0	0	a	a.118.30.1	A
d4sgbi_	51	48	17	12	7	1.428	0.895	0.684	0.589	0.707	0.632	0	0	1	1	0	0	g	g.69.1.1	I
d4tkca_	118	118	20	19	12	4.560	0.645	0.633	0.569	0.585	0.611	0	0	1	1	0	0	b	b.78.1.0	A
d4u12a_	80	80	26	19	10	4.940	0.897	0.387	0.371	0.128	0.381	0	1	0	0	0	0	a	a.292.1.1	A
d4u60a_	271	247	38	26	14	13.832	0.950	0.595	0.449	0.614	0.525	0	0	1	0	0	0	b	b.121.6.1	A
d4u9hl_	533	511	37	32	21	24.864	0.698	0.607	0.518	0.587	0.576	0	0	1	1	0	0	e	e.18.1.1	L
d4u9hs_	265	245	34	23	16	12.512	0.872	0.574	0.477	0.690	0.538	0	0	1	0	0	0	e	e.19.1.1	S
d4ue8a1	159	153	21	19	17	6.783	0.583	0.608	0.530	0.600	0.581	0	0	1	1	0	0	d	d.86.1.0	A(69-234)
d4uhta_	102	98	21	16	12	4.032	0.750	0.602	0.538	0.474	0.575	0	0	1	1	0	0	a	a.4.6.0	A
d4uw2a5	68	60	19	16	9	2.736	0.760	0.533	0.437	0.773	0.495	0	0	1	0	0	0	d	d.402.1.1	A(425-497)
d4uyba3	126	112	26	19	11	5.434	0.867	0.620	0.506	0.611	0.574	0	0	1	1	0	0	b	b.132.1.0	A(275-400)
d4w4ka_	82	79	38	12	6	2.736	2.111	0.667	0.570	0.562	0.626	0	0	1	1	0	1	a	a.25.4.1	A
d4w64a1	167	134	23	21	13	6.279	0.676	0.637	0.515	0.590	0.581	0	0	1	1	0	0	b	b.157.1.0	A(1-167)
d4wd8a_	268	246	59	17	14	14.042	1.903	0.540	0.446	0.594	0.507	0	0	1	0	0	0	f	f.67.1.1	A
d4wiqa2	125	120	22	18	15	5.940	0.667	0.587	0.477	0.699	0.544	0	0	1	0	0	0	d	d.272.1.1	A(179-303)
d4wisa1	452	388	39	27	25	26.325	0.750	0.511	0.400	0.627	0.467	0	0	1	0	0	0	f	f.68.1.1	A(151-628)
d4wisa2	202	153	68	15	13	13.260	2.429	0.399	0.298	0.581	0.360	1	0	0	0	0	1	d	d.58.64.1	A(19-150,629-719)
d4wjka_	452	424	34	27	22	20.196	0.694	0.553	0.497	0.358	0.535	0	0	1	0	0	0	b	b.69.8.0	A
d4wpka1	227	223	27	22	17	10.098	0.692	0.589	0.524	0.599	0.566	0	0	1	1	0	0	c	c.18.1.0	A(1-227)
d4wsbc6	247	243	40	31	21	26.040	0.769	0.193	0.216	0.168	0.212	1	0	0	0	1	0	e	e.82.1.1	C(1-247)
d4wwxb3	167	162	30	18	15	8.100	0.909	0.586	0.493	0.641	0.545	0	0	1	0	0	0	f	f.66.1.1	B(791-957)
d4x9xa_	268	266	31	25	17	13.175	0.738	0.574	0.495	0.666	0.546	0	0	1	0	0	0	c	c.119.1.0	A
d4xb6b_	194	186	26	19	16	7.904	0.743	0.576	0.533	0.603	0.570	0	0	1	1	0	0	c	c.67.2.1	B
d4xdxa_	70	64	20	13	13	3.380	0.769	0.589	0.475	0.549	0.541	0	0	1	0	0	0	d	d.9.1.1	A
d4xfma_	400	368	50	23	20	23.000	1.163	0.457	0.381	0.467	0.424	0	1	0	0	0	0	c	c.146.1.0	A
d4xgab1	91	81	25	13	10	3.250	1.087	0.589	0.566	0.321	0.587	0	0	1	1	0	0	d	d.391.1.0	B(175-265)
d4xmra1	241	229	44	17	16	11.968	1.333	0.597	0.485	0.480	0.545	0	0	1	0	0	0	d	d.110.6.4	A(41-285)
d4ypoa2	145	137	31	22	16	10.912	0.816	0.338	0.301	0.557	0.331	0	1	0	0	0	0	a	a.100.1.0	A(181-325)
d4z9ha_	165	151	40	14	12	6.720	1.538	0.611	0.529	0.620	0.583	0	0	1	1	0	0	a	a.24.2.0	A
d4zdsa1	131	120	21	17	16	5.712	0.636	0.606	0.526	0.643	0.579	0	0	1	1	0	0	a	a.140.5.1	A(174-304)
d4zeya1	83	79	32	12	8	3.072	1.600	0.644	0.559	0.584	0.611	0	0	1	1	0	0	a	a.7.16.1	A(4-86)
d4zh7a2	81	74	30	13	10	3.900	1.304	0.574	0.430	0.723	0.512	0	0	1	0	0	0	d	d.403.1.1	A(177-257)
d5ae0a_	217	202	29	18	18	9.396	0.806	0.825	0.729	0.879	0.788	0	0	1	1	0	0	d	d.61.1.3	A
d5ax2a_	78	74	20	14	11	3.080	0.800	0.619	0.556	0.565	0.603	0	0	1	1	0	0	g	g.41.17.1	A
d5azpa_	446	351	65	24	17	26.520	1.585	0.477	0.351	0.538	0.422	0	1	0	0	0	0	f	f.5.1.0	A
d5b1na_	59	57	28	11	5	1.540	1.750	0.614	0.619	0.447	0.621	0	0	1	1	1	0	a	a.30.2.1	A
d5b5eb_	501	449	57	25	23	32.775	1.188	0.442	0.357	0.605	0.414	0	1	0	0	0	0	f	f.55.1.1	b
d5b5ee_	79	63	43	12	9	4.644	2.048	0.290	0.272	0.346	0.288	1	0	0	0	0	1	f	f.23.38.1	e
d5b5eh_	63	55	40	21	7	5.880	1.429	0.207	0.189	0.129	0.200	1	0	0	0	0	0	f	f.23.33.1	H
d5b5ei_	35	31	29	5	4	0.580	3.222	0.803	0.699	0.760	0.762	0	0	1	1	0	1	f	f.23.37.1	I
d5b5ej_	40	32	31	6	4	0.744	3.100	0.862	0.663	0.829	0.770	0	0	1	1	0	1	f	f.23.32.1	j
d5b5ek_	37	37	34	8	5	1.360	2.615	0.490	0.454	0.574	0.474	0	1	0	0	0	1	f	f.23.36.1	K
d5b5el_	37	28	28	12	4	1.344	1.750	0.420	0.379	0.382	0.405	0	1	0	0	0	0	f	f.23.31.1	L
d5b5em_	34	31	28	6	4	0.672	2.800	0.826	0.699	0.862	0.767	0	0	1	1	0	1	f	f.23.35.1	M
d5b5et_	30	28	27	6	5	0.810	2.455	0.742	0.608	0.916	0.687	0	0	1	1	0	1	f	f.23.34.1	T
d5b5ex_	38	33	31	5	4	0.620	3.444	0.820	0.709	0.906	0.776	0	0	1	1	0	1	f	f.23.40.1	X
d5b5ez_	62	60	29	10	8	2.320	1.611	0.596	0.523	0.551	0.568	0	0	1	1	0	0	f	f.17.5.1	Z
d5bq9a2	134	124	20	18	15	5.400	0.606	0.602	0.540	0.452	0.579	0	0	1	1	0	0	d	d.400.1.1	A(1-134)
d5br4a1	383	372	35	25	20	17.500	0.778	0.583	0.516	0.535	0.561	0	0	1	1	0	0	e	e.22.1.2	A(1-383)
d5c6na_	446	439	34	31	21	22.134	0.654	0.460	0.466	0.132	0.464	0	1	0	0	1	0	f	f.61.1.1	A
d5ckla1	180	177	22	20	18	7.920	0.579	0.578	0.531	0.666	0.569	0	0	1	1	0	0	a	a.265.1.1	A(11-190)
d5d7wa2	225	204	33	18	14	8.316	1.031	0.623	0.527	0.589	0.581	0	0	1	1	0	0	b	b.80.7.0	A(247-471)
d5d8va_	83	80	17	16	11	2.992	0.630	0.616	0.558	0.489	0.592	0	0	1	1	0	0	g	g.35.1.1	A
d5em0a1	132	129	22	17	14	5.236	0.710	0.621	0.551	0.680	0.600	0	0	1	1	0	0	d	d.110.1.1	A(2-133)
d5fbfa_	267	255	32	22	17	11.968	0.821	0.622	0.538	0.697	0.598	0	0	1	1	0	0	a	a.124.1.0	A
d5ffga2	155	144	38	15	13	7.410	1.357	0.620	0.506	0.581	0.569	0	0	1	1	0	0	b	b.1.15.0	A(440-594)
d5fvka_	82	76	30	12	8	2.880	1.500	0.611	0.550	0.392	0.592	0	0	1	1	0	0	a	a.7.14.0	A
d5fyza2	131	128	28	16	12	5.376	1.000	0.581	0.536	0.681	0.569	0	0	1	1	0	0	g	g.102.1.0	A(623-753)
d5gmkf_	115	94	32	17	12	6.528	1.103	0.412	0.325	0.604	0.372	0	1	0	0	0	0	d	d.395.1.1	F
d5gmkh_	95	90	29	21	11	6.699	0.906	0.346	0.316	0.102	0.328	0	1	0	0	0	0	a	a.2.15.1	H
d5gmza_	143	124	27	22	13	7.722	0.771	0.608	0.422	0.709	0.522	0	0	1	0	0	0	a	a.62.1.1	A
d5gv0a1	161	153	30	16	14	6.720	1.000	0.590	0.521	0.409	0.562	0	0	1	1	0	0	b	b.180.1.0	A(208-368)
d5i1mv_	458	402	48	35	13	21.840	1.000	0.283	0.230	0.180	0.265	1	0	0	0	0	0	f	f.65.1.1	V
d5id6a2	116	102	19	18	14	4.788	0.594	0.504	0.490	0.221	0.494	0	0	1	0	0	0	d	d.398.1.1	A(1011-1136)
d5id6a3	230	194	32	24	19	14.592	0.744	0.470	0.365	0.635	0.432	0	1	0	0	0	0	b	b.111.2.1	A(0-34,515-583,678-808)
d5id6a4	91	89	19	17	12	3.876	0.655	0.629	0.554	0.600	0.600	0	0	1	1	0	0	a	a.302.1.1	A(584-677)
d5id6a5	464	419	40	32	28	35.840	0.667	0.364	0.315	0.236	0.343	0	1	0	0	0	0	e	e.84.1.1	A(35-514)
d5ig6a1	107	106	24	17	12	4.896	0.828	0.576	0.522	0.561	0.557	0	0	1	1	0	0	a	a.29.2.0	A(348-454)
d5ii8a_	131	123	33	15	12	5.940	1.222	0.626	0.520	0.584	0.589	0	0	1	1	0	0	a	a.19.1.1	A
d5k2la_	49	47	14	11	10	1.540	0.667	0.574	0.564	0.374	0.574	0	0	1	1	0	0	d	d.7.1.0	A
d5ktna1	300	285	30	27	17	13.770	0.682	0.597	0.519	0.418	0.570	0	0	1	1	0	0	c	c.145.1.1	A(1-300)
d5lj3n2	135	116	25	21	11	5.775	0.781	0.624	0.481	0.738	0.559	0	0	1	0	0	0	g	g.100.1.1	N(6-144)
d5m0yb1	95	89	25	13	11	3.575	1.042	0.606	0.551	0.651	0.585	0	0	1	1	0	0	b	b.3.2.0	B(8-102)
d5m17a_	349	330	31	23	22	15.686	0.689	0.598	0.529	0.636	0.577	0	0	1	1	0	0	c	c.1.34.0	A
d5m1ea2	167	143	28	19	16	8.512	0.800	0.596	0.440	0.665	0.525	0	0	1	0	0	0	d	d.333.1.0	A(326-492)
d5m33a1	89	85	21	16	12	4.032	0.750	0.630	0.505	0.632	0.579	0	0	1	1	0	0	a	a.135.1.1	A(113-201)
d5mawe_	112	98	25	14	12	4.200	0.962	0.608	0.534	0.533	0.577	0	0	1	1	0	0	a	a.24.19.0	E
d5muxa_	469	447	40	27	21	22.680	0.833	0.607	0.511	0.642	0.567	0	0	1	1	0	0	e	e.44.1.1	A
d5ncga1	111	102	19	16	15	4.560	0.613	0.632	0.529	0.474	0.585	0	0	1	1	0	0	b	b.55.1.4	A(1-111)
d5njcb_	443	424	41	30	20	24.600	0.820	0.311	0.378	0.042	0.348	0	1	0	0	1	0	d	d.283.1.0	B
d5nw3a_	54	50	13	12	9	1.404	0.619	0.904	0.862	0.785	0.891	0	0	1	1	0	0	g	g.41.5.1	A
d5o5ta2	233	187	26	22	16	9.152	0.684	0.615	0.510	0.693	0.576	0	0	1	1	0	0	c	c.8.4.1	A(118-350)
d5o5ta3	157	147	34	17	12	6.936	1.172	0.612	0.516	0.516	0.571	0	0	1	1	0	0	a	a.48.2.1	A(594-750)
d5o9ma1	151	140	24	19	15	6.840	0.706	0.587	0.512	0.538	0.560	0	0	1	1	0	0	b	b.88.1.2	A(1-172)
d5olla_	35	33	15	11	7	1.155	0.833	0.732	0.570	0.793	0.656	0	0	1	1	0	0	g	g.3.4.1	A
d5r0db1	152	135	22	20	16	7.040	0.611	0.627	0.499	0.630	0.571	0	0	1	0	0	0	b	b.182.1.1	B(1-152)
d5r0db2	148	137	24	18	14	6.048	0.750	0.593	0.539	0.745	0.584	0	0	1	1	0	0	a	a.118.29.1	B(170-317)
d5ryoa2	106	106	23	17	11	4.301	0.821	0.587	0.541	0.593	0.576	0	0	1	1	0	0	a	a.11.2.0	A(191-296)
d5syba_	90	80	17	15	11	2.805	0.654	0.592	0.554	0.419	0.572	0	0	1	1	0	0	g	g.101.1.1	A
d5tifa1	180	176	23	21	16	7.728	0.622	0.582	0.534	0.531	0.572	0	0	1	1	0	0	c	c.23.10.5	A(2-181)
d5u3aa2	93	86	21	16	9	3.024	0.840	0.633	0.573	0.450	0.611	0	0	1	1	0	0	b	b.71.1.1	A(404-496)
d5vfba_	724	696	46	33	29	44.022	0.742	0.550	0.416	0.578	0.495	0	0	1	0	0	0	c	c.1.13.1	A
d5wopa_	159	156	25	19	16	7.600	0.714	0.618	0.511	0.716	0.574	0	0	1	1	0	0	d	d.397.1.1	A
d5xbxa1	178	178	27	19	15	7.695	0.794	0.635	0.547	0.669	0.606	0	0	1	1	0	0	b	b.52.1.0	A(1-178)
d5xvta3	146	125	21	18	15	5.670	0.636	0.612	0.513	0.617	0.573	0	0	1	1	0	0	c	c.48.1.0	A(532-677)
d5xz7a1	318	298	43	19	17	13.889	1.194	0.587	0.495	0.692	0.549	0	0	1	0	0	0	c	c.89.1.1	A(1-322)
d5ycqa_	77	73	20	13	12	3.120	0.800	0.639	0.551	0.598	0.611	0	0	1	1	0	0	b	b.34.17.1	A
d5yxma_	194	184	32	18	14	8.064	1.000	0.596	0.530	0.727	0.577	0	0	1	1	0	0	c	c.10.3.1	A
d5yzpa1	105	97	22	15	14	4.620	0.759	0.611	0.497	0.456	0.558	0	0	1	0	0	0	b	b.40.16.0	A(221-325)
d5z1fa2	162	150	32	21	13	8.736	0.941	0.478	0.379	0.503	0.439	0	1	0	0	0	0	d	d.58.63.1	A(185-354,671-696)
d5zioa_	228	222	24	20	19	9.120	0.615	0.603	0.548	0.609	0.589	0	0	1	1	0	0	d	d.157.1.0	A
d5zrta_	160	153	35	14	14	6.860	1.250	0.609	0.536	0.520	0.578	0	0	1	1	0	0	b	b.166.1.0	A
d5zw7a1	230	207	30	23	15	10.350	0.789	0.578	0.492	0.615	0.548	0	0	1	0	0	0	e	e.6.1.0	A(1-230)
d5zw7a2	153	134	37	14	11	5.698	1.480	0.614	0.532	0.492	0.584	0	0	1	1	0	0	a	a.29.3.0	A(231-383)
d6ao9a_	171	161	27	19	15	7.695	0.794	0.635	0.515	0.699	0.582	0	0	1	1	0	0	d	d.58.29.0	A
d6av8a_	29	27	12	9	6	0.648	0.800	0.765	0.657	0.798	0.714	0	0	1	1	0	0	g	g.3.6.2	A
d6bpla1	325	262	49	24	16	18.816	1.225	0.391	0.336	0.480	0.380	0	1	0	0	0	0	f	f.37.1.1	A(4-328)
d6bxda_	192	187	29	17	16	7.888	0.879	0.593	0.533	0.540	0.574	0	0	1	1	0	0	c	c.10.2.0	A
d6cbra1	139	127	33	17	13	7.293	1.100	0.588	0.435	0.626	0.515	0	0	1	0	0	0	a	a.236.1.1	A(443-581)
d6dcma_	85	80	18	16	10	2.880	0.692	0.647	0.587	0.693	0.629	0	0	1	1	0	0	g	g.14.1.0	A
d6e36a_	395	343	36	28	18	18.144	0.783	0.557	0.481	0.578	0.533	0	0	1	0	0	0	b	b.30.6.1	A
d6e6oa_	40	40	15	9	8	1.080	0.882	0.653	0.603	0.737	0.637	0	0	1	1	0	0	a	a.10.1.1	A
d6e85a1	328	325	39	22	19	16.302	0.951	0.547	0.480	0.538	0.523	0	0	1	0	0	0	c	c.77.1.0	A(1-328)
d6ea3a_	70	63	27	12	8	2.592	1.350	0.629	0.540	0.648	0.597	0	0	1	1	0	0	d	d.100.2.0	A
d6enia_	104	90	27	16	15	6.480	0.871	0.298	0.318	0.042	0.305	1	0	0	0	1	0	a	a.4.12.1	A
d6fgca1	180	151	45	13	12	7.020	1.800	0.510	0.449	0.564	0.486	0	0	1	0	0	0	b	b.103.1.1	A(319-498)
d6fgca3	77	67	23	12	10	2.760	1.045	0.600	0.530	0.580	0.567	0	0	1	1	0	0	b	b.85.6.0	A(654-736)
d6frea1	150	142	20	19	15	5.700	0.588	0.616	0.572	0.673	0.602	0	0	1	1	0	0	b	b.86.1.2	A(-6-159)
d6ftfb1	145	138	26	20	13	6.760	0.788	0.595	0.497	0.585	0.557	0	0	1	0	0	0	b	b.82.3.0	B(211-355)
d6g6ka1	87	72	50	14	8	5.600	2.273	0.376	0.304	0.213	0.335	0	1	0	0	0	1	a	a.38.1.0	A(898-984)
d6gkea_	309	299	26	23	23	13.754	0.565	0.561	0.521	0.260	0.549	0	0	1	1	0	0	b	b.68.8.1	A
d6gkxa_	134	112	27	17	12	5.508	0.931	0.615	0.493	0.380	0.560	0	0	1	0	0	0	b	b.106.1.0	A
d6gx2a1	291	270	28	25	20	14.000	0.622	0.588	0.517	0.624	0.565	0	0	1	1	0	0	c	c.68.1.9	A(64-354)
[truncated: 125 more rows]
