# Supplementary material for: Improved Assessment of Globularity of Protein Structures and the Ellipsoid Profile of the Biological Assemblies from the PDB
Source: Biomolecules. 2023 Feb 17;13(2):385. doi: 10.3390/biom13020385 (PMC9953691; doi:10.3390/biom13020385)
Supplement: Supplementary file 1 [file biomolecules-13-00385-s001.zip › s6.tsv]

DOMAIN	EFFECTIVE	GUIDES	R_X	R_Y	R_Z	V	T	EI_0.3	EI_1.0	EP_0.1	EP_1.0	C_N	C_S	C_G	C_H	C_U	C_E	GROUP	FAMILY	SELECTION
d16vpa_	311	311	48	23	18	19.872	1.171	0.554	0.432	0.621	0.508	0	0	1	0	0	0	d	d.180.1.1	A
d1a02f_	53	53	52	7	5	1.820	4.333	0.731	0.578	0.836	0.669	0	0	1	1	0	1	h	h.1.3.1	F
d1a12a_	401	401	34	29	27	26.622	0.607	0.558	0.424	0.298	0.501	0	0	1	0	0	0	b	b.69.5.1	A
d1a1ia1	29	29	13	11	6	0.858	0.765	0.665	0.615	0.607	0.648	0	0	1	1	0	0	g	g.37.1.1	A(103-131)
d1a1xa_	106	106	22	21	15	6.930	0.611	0.598	0.428	0.504	0.520	0	0	1	0	0	0	b	b.63.1.1	A
d1a62a1	47	47	16	12	9	1.728	0.762	0.619	0.542	0.684	0.580	0	0	1	1	0	0	a	a.140.3.1	A(1-47)
d1a92a_	50	50	39	14	6	3.276	1.950	0.268	0.305	0.107	0.289	1	0	0	0	1	0	h	h.4.6.1	A
d1aa0a_	113	113	80	15	13	15.600	2.857	0.138	0.156	0.011	0.148	1	0	0	0	1	1	h	h.1.17.1	A
d1abva_	105	105	26	15	12	4.680	0.963	0.630	0.521	0.515	0.581	0	0	1	1	0	0	a	a.70.1.1	A
d1ad2a_	224	224	30	26	19	14.820	0.667	0.431	0.367	0.370	0.402	0	1	0	0	0	0	e	e.24.1.1	A
d1ae9a_	172	172	28	21	16	9.408	0.757	0.588	0.478	0.618	0.548	0	0	1	0	0	0	d	d.163.1.1	A
d1aepa_	153	153	37	15	13	7.215	1.321	0.588	0.503	0.528	0.556	0	0	1	1	0	0	a	a.63.1.1	A
d1af7a1	81	81	31	15	13	6.045	1.107	0.472	0.362	0.669	0.429	0	1	0	0	0	0	a	a.58.1.1	A(11-91)
d1afa12	32	32	32	5	4	0.640	3.556	0.862	0.732	0.849	0.816	0	0	1	1	0	1	h	h.1.1.1	1(73-104)
d1afpa_	51	51	18	11	8	1.584	0.947	0.709	0.609	0.724	0.663	0	0	1	1	0	0	g	g.26.1.1	A
d1aik.1	70	70	39	13	9	4.563	1.773	0.533	0.409	0.589	0.480	0	0	1	0	0	0	h	h.3.2.1	N+C
d1akya2	38	38	14	12	8	1.344	0.700	0.653	0.555	0.501	0.610	0	0	1	1	0	0	g	g.41.2.1	A(131-168)
d1ansa_	27	27	11	8	7	0.616	0.733	0.660	0.602	0.795	0.635	0	0	1	1	0	0	g	g.11.1.1	A
d1aola_	228	228	33	29	17	16.269	0.717	0.537	0.390	0.643	0.478	0	0	1	0	0	0	b	b.20.1.1	A
d1aq5a1	43	43	43	7	6	1.806	3.308	0.619	0.482	0.555	0.563	0	0	1	0	0	1	h	h.1.6.1	A(5-47)
d1auua_	55	55	24	11	10	2.640	1.143	0.604	0.497	0.655	0.569	0	0	1	0	0	0	b	b.35.2.1	A
d1av1a1	200	200	70	51	33	117.810	0.833	0.000	0.026	0.000	0.012	1	0	0	0	1	0	h	h.5.1.1	A(44-243)
d1ayoa_	130	130	27	17	15	6.885	0.844	0.607	0.483	0.466	0.549	0	0	1	0	0	0	b	b.1.29.1	A
d1b0na1	35	35	19	14	7	1.862	0.905	0.429	0.405	0.533	0.426	0	1	0	0	0	0	a	a.34.1.1	A(74-108)
d1b25a1	401	401	36	30	27	29.160	0.632	0.444	0.377	0.548	0.424	0	1	0	0	0	0	a	a.110.1.1	A(211-619)
d1b25a2	210	210	25	22	17	9.350	0.641	0.620	0.538	0.588	0.589	0	0	1	1	0	0	d	d.152.1.1	A(1-210)
d1b33n_	67	67	26	12	11	3.432	1.130	0.564	0.445	0.457	0.513	0	0	1	0	0	0	d	d.30.1.1	N
d1b67a_	68	68	26	13	10	3.380	1.130	0.345	0.363	0.166	0.350	0	1	0	0	1	0	a	a.22.1.2	A
d1b79a_	102	102	20	15	14	4.200	0.690	0.617	0.568	0.564	0.608	0	0	1	1	0	0	a	a.81.1.1	A
d1bbga_	40	40	14	10	7	0.980	0.824	0.654	0.621	0.930	0.649	0	0	1	1	0	0	g	g.6.1.1	A
d1bcoa1	80	80	20	18	11	3.960	0.690	0.621	0.484	0.519	0.559	0	0	1	0	0	0	b	b.48.1.1	A(481-560)
d1bg1a1	177	177	49	17	13	10.829	1.633	0.609	0.453	0.522	0.535	0	0	1	0	0	0	a	a.47.1.1	A(136-321)
d1bg8a_	76	76	21	15	13	4.095	0.750	0.543	0.443	0.595	0.513	0	0	1	0	0	0	a	a.57.1.1	A
d1bgfa_	124	124	29	22	14	8.932	0.806	0.540	0.388	0.700	0.477	0	0	1	0	0	0	a	a.90.1.1	A
d1bi6h1	24	24	11	8	6	0.528	0.786	0.763	0.704	0.300	0.726	0	0	1	1	0	0	g	g.3.12.1	H(8-31)
d1bkra_	108	108	20	17	14	4.760	0.645	0.627	0.557	0.583	0.604	0	0	1	1	0	0	a	a.40.1.1	A
d1bm8a_	99	99	18	16	13	3.744	0.621	0.596	0.566	0.716	0.593	0	0	1	1	0	0	d	d.34.1.1	A
d1boua_	132	132	30	25	15	11.250	0.750	0.439	0.322	0.322	0.388	0	1	0	0	0	0	a	a.88.1.1	A
d1boub_	298	298	27	25	22	14.850	0.574	0.587	0.503	0.651	0.562	0	0	1	1	0	0	c	c.56.6.1	B
d1bx7a_	51	51	27	13	10	3.510	1.174	0.552	0.367	0.442	0.467	0	0	1	0	0	0	g	g.3.15.1	A
d1byia_	224	224	29	23	19	12.673	0.690	0.538	0.441	0.627	0.504	0	0	1	0	0	0	c	c.37.1.10	A
d1c17m_	142	142	38	21	12	9.576	1.152	0.423	0.365	0.477	0.401	0	1	0	0	0	0	f	f.18.1.1	M
d1c1ga_	284	284	246	19	11	51.414	8.200	0.133	0.129	0.091	0.130	1	0	0	0	0	1	h	h.1.5.1	A
d1c1ka_	217	217	37	21	16	12.432	1.000	0.601	0.481	0.541	0.550	0	0	1	0	0	0	a	a.120.1.1	A
d1c5ea_	95	95	22	16	12	4.224	0.786	0.595	0.481	0.740	0.548	0	0	1	0	0	0	b	b.85.2.1	A
d1c75a_	71	71	14	13	12	2.184	0.560	0.463	0.524	0.222	0.492	0	1	0	0	1	0	a	a.3.1.1	A
d1ca4a2	16	16	16	4	3	0.192	2.286	0.878	0.803	0.815	0.841	0	0	1	1	0	1	h	h.1.2.1	A(334-349)
d1cbha_	36	36	16	10	6	0.960	1.000	0.673	0.627	0.723	0.673	0	0	1	1	0	0	g	g.3.8.1	A
d1cc7a_	72	72	20	13	11	2.860	0.833	0.591	0.563	0.477	0.593	0	0	1	1	0	0	d	d.58.17.1	A
d1ccwa_	137	137	21	19	16	6.384	0.600	0.574	0.498	0.650	0.549	0	0	1	0	0	0	c	c.23.6.1	A
d1cfza_	162	162	27	23	14	8.694	0.730	0.580	0.470	0.621	0.537	0	0	1	0	0	0	c	c.56.1.1	A
d1chda_	198	198	26	20	19	9.880	0.667	0.578	0.493	0.604	0.553	0	0	1	0	0	0	c	c.40.1.1	A
d1ciia2	428	428	138	21	18	52.164	3.538	0.294	0.227	0.158	0.265	1	0	0	0	0	1	h	h.4.3.1	A(23-450)
d1cipa1	121	121	24	19	12	5.472	0.774	0.582	0.496	0.712	0.545	0	0	1	0	0	0	a	a.66.1.1	A(61-181)
d1co4a_	42	42	22	14	9	2.772	0.957	0.465	0.358	0.733	0.430	0	1	0	0	0	0	g	g.47.1.1	A
d1cola_	197	197	24	19	18	8.208	0.649	0.578	0.541	0.556	0.574	0	0	1	1	0	0	f	f.1.1.1	A
d1cq3a_	224	224	31	24	20	14.880	0.705	0.506	0.378	0.560	0.455	0	0	1	0	0	0	b	b.27.1.1	A
d1crua_	448	448	35	29	23	23.345	0.673	0.562	0.488	0.583	0.539	0	0	1	0	0	0	b	b.68.2.1	A
d1cuka1	48	48	15	11	9	1.485	0.750	0.590	0.533	0.284	0.568	0	0	1	1	0	0	a	a.5.1.1	A(156-203)
d1cxzb_	86	86	35	12	9	3.780	1.667	0.584	0.511	0.650	0.561	0	0	1	1	0	0	a	a.2.6.1	B
d1d0qa_	102	102	28	14	11	4.312	1.120	0.613	0.531	0.534	0.584	0	0	1	1	0	0	g	g.41.3.2	A
d1d1ra1	81	81	25	16	13	5.200	0.862	0.536	0.400	0.374	0.474	0	0	1	0	0	0	d	d.64.1.1	A(29-109)
d1d3ya_	289	289	39	28	17	18.564	0.867	0.502	0.411	0.587	0.466	0	0	1	0	0	0	e	e.12.1.1	A
d1d6ga_	47	47	25	11	8	2.200	1.316	0.495	0.424	0.560	0.467	0	1	0	0	0	0	g	g.33.1.1	A
d1d7ma_	101	101	92	11	8	8.096	4.842	0.222	0.250	0.101	0.239	1	0	0	0	1	1	h	h.1.10.1	A
d1dcea2	109	109	24	20	13	6.240	0.727	0.633	0.444	0.632	0.544	0	0	1	0	0	0	b	b.7.4.1	A(242-350)
d1dcsa_	279	279	33	26	21	18.018	0.702	0.529	0.416	0.525	0.487	0	0	1	0	0	0	b	b.82.2.1	A
d1dd9a_	310	310	45	25	20	22.500	1.000	0.483	0.376	0.412	0.440	0	1	0	0	0	0	e	e.13.1.1	A
d1deba_	54	54	55	9	5	2.475	3.929	0.612	0.449	0.631	0.536	0	0	1	0	0	1	h	h.1.18.1	A
d1dfup_	94	94	23	17	12	4.692	0.793	0.607	0.486	0.533	0.553	0	0	1	0	0	0	b	b.53.1.1	P
d1di2a_	69	69	24	13	11	3.432	1.000	0.645	0.488	0.651	0.576	0	0	1	0	0	0	d	d.50.1.1	A
d1dipa_	77	77	47	25	11	12.925	1.306	0.101	0.124	0.017	0.114	1	0	0	0	1	0	h	h.1.12.1	A
d1diva1	94	94	31	13	10	4.030	1.348	0.568	0.518	0.464	0.554	0	0	1	1	0	0	d	d.99.1.1	A(56-149)
d1dj0a_	264	264	34	23	18	14.076	0.829	0.571	0.467	0.487	0.523	0	0	1	0	0	0	d	d.265.1.1	A
d1dk8a_	147	147	42	23	19	18.354	1.000	0.273	0.222	0.373	0.259	1	0	0	0	0	0	a	a.91.1.1	A
d1dkga1	59	59	23	9	8	1.656	1.353	0.633	0.580	0.582	0.611	0	0	1	1	0	0	b	b.73.1.1	A(139-197)
d1dkga2	99	99	77	11	9	7.623	3.850	0.404	0.305	0.386	0.359	0	1	0	0	0	1	h	h.1.9.1	A(34-138)
d1dl5a2	104	104	23	17	14	5.474	0.742	0.611	0.494	0.619	0.565	0	0	1	0	0	0	d	d.197.1.1	A(214-317)
d1dmga_	172	172	28	21	18	10.584	0.718	0.511	0.407	0.543	0.469	0	0	1	0	0	0	c	c.22.1.1	A
d1dpjb_	29	29	27	6	4	0.648	2.700	0.759	0.672	0.859	0.733	0	0	1	1	0	1	a	a.137.7.1	B
d1dqca_	73	73	21	15	10	3.150	0.840	0.588	0.465	0.745	0.527	0	0	1	0	0	0	g	g.31.1.1	A
d1dtdb_	61	61	17	13	10	2.210	0.739	0.635	0.557	0.769	0.601	0	0	1	1	0	0	g	g.30.1.1	B
d1dvka_	149	149	26	19	17	8.398	0.722	0.625	0.474	0.482	0.553	0	0	1	0	0	0	a	a.72.1.1	A
d1dvoa_	152	152	52	22	13	14.872	1.486	0.406	0.283	0.278	0.350	1	0	0	0	0	0	a	a.136.1.1	A
d1dzfa1	139	139	26	20	16	8.320	0.722	0.590	0.436	0.655	0.517	0	0	1	0	0	0	c	c.52.3.1	A(5-143)
d1dzfa2	72	72	21	16	11	3.696	0.778	0.560	0.451	0.653	0.519	0	0	1	0	0	0	d	d.78.1.1	A(144-215)
d1e19a_	313	313	35	30	24	25.200	0.648	0.479	0.351	0.375	0.420	0	1	0	0	0	0	c	c.73.1.1	A
d1e2aa_	102	102	33	14	10	4.620	1.375	0.551	0.481	0.513	0.527	0	0	1	0	0	0	a	a.7.2.1	A
d1e2wa1	187	187	35	20	15	10.500	1.000	0.594	0.467	0.555	0.542	0	0	1	0	0	0	b	b.2.6.1	A(1-168,233-251)
d1e44b_	96	96	24	17	13	5.304	0.800	0.553	0.424	0.680	0.498	0	0	1	0	0	0	b	b.101.1.1	B
d1e7la1	54	54	18	12	10	2.160	0.818	0.628	0.563	0.785	0.610	0	0	1	1	0	0	a	a.140.4.1	A(104-157)
d1e8pa_	46	46	15	13	10	1.950	0.652	0.679	0.524	0.788	0.611	0	0	1	1	0	0	g	g.55.1.1	A
d1e8ra1	49	49	16	14	10	2.240	0.667	0.631	0.474	0.690	0.567	0	0	1	0	0	0	g	g.29.1.1	A(21-69)
d1eb6a_	177	177	24	18	17	7.344	0.686	0.594	0.542	0.706	0.583	0	0	1	1	0	0	d	d.92.1.12	A
d1ecia_	37	37	15	11	10	1.650	0.714	0.554	0.453	0.626	0.511	0	0	1	0	0	0	a	a.33.1.1	A
d1ecwa_	114	114	24	18	14	6.048	0.750	0.575	0.466	0.733	0.535	0	0	1	0	0	0	a	a.61.1.1	A
d1ef1c_	90	90	46	26	9	10.764	1.314	0.304	0.201	0.468	0.260	1	0	0	0	0	0	a	a.137.5.1	C
d1egwa_	71	71	28	16	11	4.928	1.037	0.282	0.293	0.366	0.290	1	0	0	0	1	0	d	d.88.1.1	A
d1ehsa_	48	48	23	11	8	2.024	1.211	0.542	0.470	0.541	0.521	0	0	1	0	0	0	g	g.2.1.1	A
d1ei5a1	82	82	18	16	12	3.456	0.643	0.600	0.495	0.567	0.554	0	0	1	0	0	0	b	b.61.3.1	A(336-417)
d1eiwa_	111	111	23	18	14	5.796	0.719	0.484	0.427	0.481	0.468	0	1	0	0	0	0	c	c.23.3.1	A
d1ej5a_	107	107	35	25	17	14.875	0.833	0.453	0.230	0.617	0.350	1	0	0	0	0	0	a	a.68.1.1	A
d1el6a_	208	208	48	30	17	24.480	1.021	0.225	0.200	0.146	0.214	1	0	0	0	0	0	d	d.182.1.1	A
d1elka_	153	153	23	22	18	9.108	0.575	0.585	0.448	0.524	0.526	0	0	1	0	0	0	a	a.118.9.2	A
d1em8b_	110	110	27	20	13	7.020	0.818	0.552	0.405	0.644	0.490	0	0	1	0	0	0	c	c.126.1.1	B
d1enwa_	114	114	40	19	17	12.920	1.111	0.388	0.244	0.500	0.327	1	0	0	0	0	0	a	a.5.4.1	A
d1eo8b_	175	175	64	18	16	18.432	1.882	0.426	0.280	0.623	0.363	1	0	0	0	0	0	h	h.3.1.1	B
d1epwa4	328	328	66	21	20	27.720	1.610	0.571	0.368	0.626	0.477	0	0	1	0	0	0	h	h.4.2.1	A(534-861)
d1eq7a_	56	56	52	8	4	1.664	4.333	0.488	0.466	0.460	0.486	0	1	0	0	0	1	h	h.1.16.1	A
d1eu1a1	155	155	29	24	16	11.136	0.725	0.474	0.338	0.632	0.415	0	1	0	0	0	0	b	b.52.2.2	A(626-780)
d1eu1a2	612	612	46	34	26	40.664	0.767	0.460	0.394	0.427	0.435	0	1	0	0	0	0	c	c.81.1.1	A(4-625)
d1ewfa1	217	217	56	21	15	17.640	1.556	0.463	0.341	0.382	0.415	0	1	0	0	0	0	d	d.83.1.1	A(1-217)
d1eyfa_	92	92	39	16	13	8.112	1.345	0.448	0.291	0.637	0.378	1	0	0	0	0	0	g	g.48.1.1	A
d1ezga_	82	82	22	11	8	1.936	1.158	0.657	0.646	0.773	0.663	0	0	1	1	0	0	b	b.80.2.1	A
d1ezja_	114	114	69	16	12	13.248	2.464	0.285	0.225	0.171	0.255	1	0	0	0	0	1	h	h.1.14.1	A
d1f00i1	95	95	27	13	11	3.861	1.125	0.604	0.525	0.449	0.573	0	0	1	1	0	0	b	b.1.14.1	I(658-752)
d1f0la1	155	155	29	19	16	8.816	0.829	0.564	0.426	0.621	0.503	0	0	1	0	0	0	b	b.2.1.1	A(381-535)
d1f0la3	178	178	26	20	17	8.840	0.703	0.581	0.450	0.507	0.518	0	0	1	0	0	0	f	f.1.2.1	A(201-380)
d1f32a_	127	127	33	21	12	8.316	1.000	0.555	0.412	0.568	0.498	0	0	1	0	0	0	d	d.62.1.1	A
d1f35a_	162	162	33	24	13	10.296	0.892	0.582	0.425	0.621	0.509	0	0	1	0	0	0	b	b.94.1.1	A
d1f3ua_	118	118	31	28	15	13.020	0.721	0.348	0.247	0.123	0.295	1	0	0	0	0	0	b	b.65.1.1	A
d1f3va_	158	158	28	21	15	8.820	0.778	0.565	0.456	0.435	0.522	0	0	1	0	0	0	d	d.58.22.1	A
d1f44a1	110	110	25	19	14	6.650	0.758	0.585	0.444	0.638	0.525	0	0	1	0	0	0	a	a.60.9.1	A(20-129)
d1f46a_	139	139	25	20	14	7.000	0.735	0.602	0.484	0.698	0.557	0	0	1	0	0	0	d	d.129.4.1	A
d1f5na1	300	300	78	25	17	33.150	1.857	0.441	0.269	0.531	0.358	1	0	0	0	0	0	a	a.114.1.1	A(284-583)
d1f6va1	90	90	26	21	13	7.098	0.765	0.464	0.336	0.410	0.405	0	1	0	0	0	0	a	a.49.1.1	A(2-91)
d1f7ua3	134	134	27	18	17	8.262	0.771	0.568	0.435	0.725	0.516	0	0	1	0	0	0	d	d.67.2.1	A(2-135)
d1f86a_	115	115	26	20	12	6.240	0.812	0.601	0.473	0.565	0.545	0	0	1	0	0	0	b	b.3.4.1	A
d1fbma_	46	46	44	7	5	1.540	3.667	0.661	0.532	0.679	0.603	0	0	1	1	0	1	h	h.1.7.1	A
d1fdma_	50	50	28	18	8	4.032	1.077	0.255	0.255	0.016	0.254	1	0	0	0	1	0	h	h.1.4.1	A
d1fe6a1	49	49	45	6	4	1.080	4.500	0.765	0.682	0.855	0.739	0	0	1	1	0	1	h	h.1.19.1	A(3-51)
d1fjgc2	101	101	25	17	12	5.100	0.862	0.619	0.469	0.514	0.551	0	0	1	0	0	0	d	d.53.1.1	C(107-207)
d1fjgj_	98	98	41	12	11	5.412	1.783	0.518	0.416	0.714	0.480	0	0	1	0	0	0	d	d.58.15.1	J
d1fjgr_	73	73	22	16	11	3.872	0.815	0.566	0.444	0.684	0.515	0	0	1	0	0	0	a	a.4.8.1	R
d1fjgs_	84	84	32	19	12	7.296	1.032	0.428	0.300	0.563	0.380	0	1	0	0	0	0	d	d.28.1.1	S
d1fjgt_	99	99	42	13	10	5.460	1.826	0.485	0.417	0.454	0.468	0	1	0	0	0	0	a	a.7.6.1	T
d1fjra_	188	188	32	21	21	14.112	0.762	0.565	0.398	0.598	0.494	0	0	1	0	0	0	b	b.102.1.1	A
d1fk5a_	93	93	20	14	12	3.360	0.769	0.443	0.503	0.363	0.478	0	1	0	0	1	0	a	a.52.1.1	A
d1fm0d_	81	81	22	17	12	4.488	0.759	0.569	0.453	0.706	0.526	0	0	1	0	0	0	d	d.15.3.1	D
d1fm0e_	142	142	30	17	16	8.160	0.909	0.506	0.443	0.410	0.489	0	0	1	0	0	0	d	d.41.5.1	E
d1fn9a_	365	365	42	23	22	21.252	0.933	0.577	0.460	0.658	0.534	0	0	1	0	0	0	d	d.196.1.1	A
d1fpoa2	95	95	32	16	12	6.144	1.143	0.520	0.409	0.690	0.482	0	0	1	0	0	0	a	a.23.1.1	A(77-171)
d1fs1a1	41	41	15	11	10	1.650	0.714	0.636	0.540	0.564	0.588	0	0	1	1	0	0	a	a.158.1.1	A(109-149)
d1fs1b1	55	55	20	14	9	2.520	0.870	0.525	0.436	0.466	0.494	0	0	1	0	0	0	a	a.157.1.1	B(86-140)
d1fsga1	230	230	31	23	19	13.547	0.738	0.567	0.456	0.623	0.524	0	0	1	0	0	0	c	c.61.1.1	A(1-230)
d1ftra1	148	148	33	20	17	11.220	0.892	0.335	0.280	0.423	0.311	1	0	0	0	0	0	d	d.58.33.1	A(1-148)
d1fu1a2	61	61	60	7	5	2.100	5.000	0.701	0.567	0.847	0.649	0	0	1	1	0	1	h	h.1.11.1	A(118-178)
d1fxka_	107	107	45	17	10	7.650	1.667	0.463	0.368	0.483	0.425	0	1	0	0	0	0	a	a.2.5.1	A
d1fzaa_	85	85	54	15	8	6.480	2.348	0.406	0.320	0.427	0.373	0	1	0	0	0	1	h	h.1.8.1	A
d1g1ia_	43	43	43	6	5	1.290	3.909	0.724	0.603	0.833	0.681	0	0	1	1	0	1	h	h.1.13.1	A
d1g2ra_	94	94	23	19	14	6.118	0.697	0.543	0.416	0.709	0.495	0	0	1	0	0	0	d	d.192.1.1	A
d1g2ya_	31	31	18	11	6	1.188	1.059	0.535	0.447	0.777	0.508	0	0	1	0	0	0	a	a.34.2.1	A
d1g3pa1	65	65	21	14	11	3.234	0.840	0.632	0.477	0.693	0.568	0	0	1	0	0	0	b	b.37.1.1	A(1-65)
d1g4ia_	123	123	23	22	11	5.566	0.697	0.562	0.506	0.474	0.544	0	0	1	1	0	0	a	a.133.1.2	A
d1g5ga1	265	265	54	33	18	32.076	1.059	0.133	0.179	0.004	0.158	1	0	0	0	1	0	f	f.12.1.1	A(33-66,224-454)
d1g6xa_	58	58	19	13	11	2.717	0.792	0.652	0.516	0.661	0.595	0	0	1	1	0	0	g	g.8.1.1	A
d1g73a_	157	157	58	20	9	10.440	2.000	0.516	0.378	0.584	0.456	0	0	1	0	0	1	a	a.7.4.1	A
d1g7sa3	131	131	38	20	16	12.160	1.056	0.537	0.319	0.590	0.438	0	0	1	0	0	0	c	c.20.1.1	A(329-459)
d1g8ea_	98	98	25	22	19	10.450	0.610	0.203	0.196	0.040	0.193	1	0	0	0	0	0	a	a.145.1.1	A
d1gcia_	269	269	24	23	21	11.592	0.545	0.610	0.526	0.627	0.586	0	0	1	1	0	0	c	c.41.1.1	A
d1gd8a_	105	105	25	17	13	5.525	0.833	0.594	0.483	0.594	0.548	0	0	1	0	0	0	d	d.188.1.1	A
d1gh9a_	71	71	24	16	15	5.760	0.774	0.478	0.316	0.742	0.406	0	1	0	0	0	0	g	g.41.6.1	A
d1ghha_	81	81	23	17	12	4.692	0.793	0.512	0.416	0.563	0.466	0	0	1	0	0	0	d	d.57.1.1	A
d1gk4a_	79	79	76	8	7	4.256	5.067	0.534	0.442	0.631	0.504	0	0	1	0	0	1	h	h.1.20.1	A
d1gkma_	507	507	50	29	25	36.250	0.926	0.557	0.384	0.674	0.477	0	0	1	0	0	0	a	a.127.1.2	A
d1gl2a_	54	54	50	8	5	2.000	3.846	0.530	0.480	0.528	0.515	0	0	1	0	0	1	h	h.1.15.1	A
d1gm5a1	99	99	27	26	15	10.530	0.659	0.382	0.272	0.702	0.341	1	0	0	0	0	0	a	a.24.21.1	A(7-105)
d1gmja_	65	65	58	7	6	2.436	4.462	0.570	0.504	0.552	0.551	0	0	1	1	0	1	h	h.4.8.1	A
d1gmua1	70	70	15	14	13	2.730	0.556	0.573	0.534	0.640	0.563	0	0	1	1	0	0	b	b.107.1.1	A(1-70)
d1gmua2	68	68	17	14	12	2.856	0.654	0.624	0.527	0.583	0.584	0	0	1	1	0	0	d	d.58.38.1	A(71-138)
d1gmxa_	108	108	20	17	14	4.760	0.645	0.602	0.532	0.712	0.580	0	0	1	1	0	0	c	c.46.1.3	A
d1go3e2	78	78	26	14	10	3.640	1.083	0.541	0.458	0.630	0.507	0	0	1	0	0	0	d	d.230.1.1	E(1-78)
d1go4e_	87	87	73	18	13	17.082	2.355	0.094	0.122	0.038	0.114	1	0	0	0	1	1	h	h.1.22.1	E
d1goia1	52	52	18	10	10	1.800	0.900	0.698	0.587	0.829	0.654	0	0	1	1	0	0	b	b.72.2.1	A(447-498)
d1gpja1	97	97	44	17	10	7.480	1.630	0.496	0.347	0.641	0.430	0	1	0	0	0	0	a	a.151.1.1	A(303-404)
d1gpja3	143	143	25	19	16	7.600	0.714	0.598	0.484	0.531	0.558	0	0	1	0	0	0	d	d.58.39.1	A(1-143)
d1gqea_	362	362	45	34	31	47.430	0.692	0.408	0.242	0.601	0.336	1	0	0	0	0	0	e	e.38.1.1	A
d1gqia2	147	147	25	21	17	8.925	0.658	0.578	0.438	0.650	0.518	0	0	1	0	0	0	d	d.92.2.2	A(5-151)
d1gs9a_	144	144	37	16	12	7.104	1.321	0.602	0.502	0.596	0.563	0	0	1	1	0	0	a	a.24.1.1	A
d1gvna_	88	88	29	14	12	4.872	1.115	0.626	0.483	0.612	0.560	0	0	1	0	0	0	a	a.8.2.1	A
d1gwea_	498	498	46	42	26	50.232	0.676	0.381	0.277	0.516	0.341	1	0	0	0	0	0	e	e.5.1.1	A
d1gxma1	323	323	31	25	21	16.275	0.674	0.495	0.459	0.535	0.486	0	1	0	0	0	0	a	a.102.5.1	A(327-649)
d1gxua_	88	88	21	14	11	3.234	0.840	0.628	0.573	0.695	0.608	0	0	1	1	0	0	d	d.58.10.1	A
d1gzsb_	165	165	33	26	16	13.728	0.786	0.481	0.347	0.451	0.429	0	1	0	0	0	0	a	a.168.1.1	B
d1h03p1	62	62	22	13	9	2.574	1.000	0.615	0.510	0.496	0.567	0	0	1	1	0	0	g	g.18.1.1	P(5-66)
d1h2sb_	60	60	29	11	6	1.914	1.706	0.591	0.544	0.547	0.578	0	0	1	1	0	0	f	f.17.4.1	B
d1h4xa_	111	111	19	17	15	4.845	0.594	0.613	0.533	0.743	0.581	0	0	1	1	0	0	c	c.13.2.1	A
d1h5wa_	250	250	67	23	20	30.820	1.558	0.485	0.262	0.595	0.380	1	0	0	0	0	0	e	e.27.1.1	A
d1h7ca_	103	103	42	12	10	5.040	1.909	0.580	0.490	0.539	0.544	0	0	1	0	0	0	a	a.7.5.1	A
d1h99a1	115	115	24	21	15	7.560	0.667	0.477	0.380	0.600	0.438	0	1	0	0	0	0	a	a.142.1.1	A(54-168)
d1ha8a_	51	51	14	12	9	1.512	0.667	0.652	0.584	0.700	0.629	0	0	1	1	0	0	g	g.58.1.1	A
d1hc7a3	74	74	16	15	13	3.120	0.571	0.606	0.495	0.744	0.557	0	0	1	0	0	0	d	d.68.5.1	A(404-477)
d1he1a1	134	134	32	17	12	6.528	1.103	0.527	0.447	0.715	0.499	0	0	1	0	0	0	a	a.24.11.1	A(96-229)
d1hf2a1	107	107	21	16	12	4.032	0.750	0.607	0.552	0.540	0.589	0	0	1	1	0	0	b	b.80.3.1	A(100-206)
d1hf2a2	89	89	18	16	14	4.032	0.600	0.596	0.510	0.537	0.560	0	0	1	1	0	0	c	c.102.1.1	A(1-99)
d1hfes_	88	88	36	27	9	8.748	1.000	0.062	0.189	0.000	0.132	1	0	0	0	1	0	a	a.137.4.1	S
d1hi9a_	274	274	30	23	19	13.110	0.714	0.574	0.508	0.531	0.555	0	0	1	1	0	0	c	c.99.1.1	A
d1hp1a1	188	188	27	19	16	8.208	0.771	0.617	0.529	0.653	0.583	0	0	1	1	0	0	d	d.114.1.1	A(363-550)
d1hq1a_	76	76	19	16	12	3.648	0.679	0.615	0.506	0.557	0.566	0	0	1	1	0	0	a	a.36.1.1	A
d1hufa_	123	123	23	17	15	5.865	0.719	0.596	0.507	0.622	0.573	0	0	1	1	0	0	d	d.195.1.1	A
d1hw1a2	152	152	25	19	16	7.600	0.714	0.601	0.496	0.555	0.551	0	0	1	0	0	0	a	a.78.1.1	A(79-230)
d1hxna_	210	210	26	24	19	11.856	0.605	0.584	0.477	0.540	0.546	0	0	1	0	0	0	b	b.66.1.1	A
d1hy9a_	41	41	16	15	8	1.920	0.696	0.515	0.430	0.638	0.482	0	0	1	0	0	0	g	g.3.17.1	A
d1hyka_	46	46	20	14	8	2.240	0.909	0.600	0.463	0.812	0.552	0	0	1	0	0	0	g	g.3.5.1	A
d1hyoa1	118	118	21	18	16	6.048	0.618	0.601	0.468	0.548	0.540	0	0	1	0	0	0	b	b.34.8.1	A(1-118)
d1hyoa2	298	298	33	28	22	20.328	0.660	0.584	0.421	0.612	0.514	0	0	1	0	0	0	d	d.177.1.1	A(119-416)
d1i2ta_	61	61	19	12	10	2.280	0.864	0.610	0.545	0.589	0.587	0	0	1	1	0	0	a	a.144.1.1	A
d1i3ja_	96	96	44	22	13	12.584	1.257	0.104	0.159	0.011	0.133	1	0	0	0	1	0	d	d.285.1.1	A
d1i4ja_	110	110	35	17	13	7.735	1.167	0.590	0.411	0.544	0.511	0	0	1	0	0	0	d	d.55.1.1	A
d1i5pa2	209	209	41	21	19	16.359	1.025	0.506	0.347	0.666	0.442	0	0	1	0	0	0	b	b.77.2.1	A(264-472)
d1i5pa3	263	263	40	31	21	26.040	0.769	0.481	0.315	0.566	0.409	0	1	0	0	0	0	f	f.1.3.1	A(1-263)
d1i8xa_	30	30	16	12	6	1.152	0.889	0.615	0.506	0.290	0.556	0	0	1	1	0	0	g	g.3.16.1	A
d1ib8a1	74	74	21	16	13	4.368	0.724	0.556	0.434	0.452	0.505	0	0	1	0	0	0	b	b.38.2.1	A(91-164)
d1ib8a2	90	90	24	16	15	5.760	0.774	0.500	0.371	0.582	0.446	0	0	1	0	0	0	d	d.52.4.1	A(1-90)
d1ifra1	109	109	22	17	14	5.236	0.710	0.625	0.524	0.476	0.590	0	0	1	1	0	0	b	b.1.16.1	A(436-544)
d1ig3a1	85	85	21	14	12	3.528	0.808	0.606	0.529	0.605	0.578	0	0	1	1	0	0	b	b.82.6.1	A(179-263)
d1ig3a2	158	158	26	22	16	9.152	0.684	0.578	0.442	0.582	0.521	0	0	1	0	0	0	c	c.100.1.1	A(21-178)
d1iiba_	103	103	20	18	14	5.040	0.625	0.597	0.492	0.533	0.550	0	0	1	0	0	0	c	c.44.2.1	A
d1iiea_	75	75	40	15	13	7.800	1.429	0.319	0.239	0.484	0.287	1	0	0	0	0	0	a	a.109.1.1	A
d1iioa1	81	81	21	15	10	3.150	0.840	0.628	0.539	0.530	0.584	0	0	1	1	0	0	a	a.39.4.1	A(1-81)
d1ijqa1	258	258	24	22	21	11.088	0.558	0.565	0.547	0.271	0.563	0	0	1	1	0	0	b	b.68.5.1	A(377-642)
d1ijya_	122	122	24	18	13	5.616	0.774	0.597	0.520	0.671	0.571	0	0	1	1	0	0	a	a.141.1.1	A
d1ikpa3	143	143	29	24	17	11.832	0.707	0.515	0.333	0.511	0.437	0	0	1	0	0	0	f	f.1.5.1	A(252-394)
d1in0a1	88	88	36	15	13	7.020	1.286	0.391	0.306	0.244	0.353	0	1	0	0	0	0	d	d.58.49.1	A(2-89)
d1io0a_	166	166	26	23	14	8.372	0.703	0.544	0.459	0.709	0.515	0	0	1	0	0	0	c	c.10.1.1	A
d1io1a_	395	395	78	38	18	53.352	1.393	0.313	0.209	0.333	0.262	1	0	0	0	0	0	e	e.32.1.1	A
d1iqoa_	88	88	23	19	15	6.555	0.676	0.479	0.339	0.595	0.418	0	1	0	0	0	0	d	d.214.1.1	A
d1iqza_	81	81	18	15	12	3.240	0.667	0.629	0.540	0.559	0.597	0	0	1	1	0	0	d	d.58.1.4	A
d1irqa_	48	48	21	14	13	3.822	0.778	0.366	0.287	0.604	0.340	1	0	0	0	0	0	a	a.43.1.4	A
d1is9a_	358	358	29	25	22	15.950	0.617	0.593	0.541	0.587	0.581	0	0	1	1	0	0	a	a.102.1.2	A
d1itxa2	72	72	18	14	12	3.024	0.692	0.636	0.531	0.750	0.595	0	0	1	1	0	0	d	d.26.3.1	A(338-409)
d1iuqa1	355	355	37	26	24	23.088	0.740	0.536	0.415	0.496	0.482	0	0	1	0	0	0	c	c.112.1.1	A(4-368)
d1ivza1	119	119	27	19	15	7.695	0.794	0.539	0.400	0.713	0.486	0	0	1	0	0	0	d	d.58.41.1	A(8-126)
d1iwga1	97	97	25	14	12	4.200	0.962	0.580	0.499	0.543	0.553	0	0	1	0	0	0	d	d.58.44.1	A(38-134)
d1iwga5	92	92	37	22	11	8.954	1.121	0.366	0.259	0.402	0.319	1	0	0	0	0	0	d	d.225.1.1	A(182-273)
d1iwga7	199	199	35	20	17	11.900	0.946	0.587	0.429	0.581	0.516	0	0	1	0	0	0	f	f.35.1.1	A(7-37,331-498)
d1ix9a1	90	90	28	12	10	3.360	1.273	0.634	0.563	0.719	0.609	0	0	1	1	0	0	a	a.2.11.1	A(1-90)
d1ix9a2	115	115	23	19	13	5.681	0.719	0.611	0.494	0.634	0.565	0	0	1	0	0	0	d	d.44.1.1	A(91-205)
d1ixma_	168	168	31	30	21	19.530	0.608	0.405	0.254	0.426	0.337	1	0	0	0	0	0	d	d.123.1.1	A
d1iyjb1	196	196	29	26	17	12.818	0.674	0.570	0.409	0.684	0.498	0	0	1	0	0	0	a	a.170.1.1	B(2403-2598)
d1iyjb2	30	30	14	10	8	1.120	0.778	0.523	0.471	0.768	0.509	0	0	1	0	0	0	a	a.171.1.1	B(2761-2897)
d1iyra_	83	83	32	18	11	6.336	1.103	0.494	0.327	0.718	0.420	0	1	0	0	0	0	a	a.164.1.1	A
d1izma_	170	170	27	23	20	12.420	0.628	0.582	0.401	0.727	0.508	0	0	1	0	0	0	a	a.199.1.1	A
d1j09a1	163	163	33	19	16	10.032	0.943	0.544	0.428	0.527	0.497	0	0	1	0	0	0	a	a.97.1.1	A(306-468)
d1j0ta_	78	78	18	16	14	4.032	0.600	0.662	0.510	0.608	0.602	0	0	1	1	0	0	a	a.163.1.1	A
d1j1db_	70	70	44	21	8	7.392	1.517	0.182	0.211	0.003	0.191	1	0	0	0	1	0	h	h.1.25.1	B
d1j26a1	99	99	28	18	12	6.048	0.933	0.561	0.406	0.563	0.491	0	0	1	0	0	0	d	d.50.4.1	A(8-106)
d1j27a_	98	98	26	14	12	4.368	1.000	0.571	0.506	0.588	0.542	0	0	1	1	0	0	d	d.58.50.1	A
d1j2jb_	41	41	22	11	6	1.452	1.294	0.598	0.532	0.493	0.570	0	0	1	1	0	0	a	a.7.8.1	B
d1j2ma_	99	99	26	20	17	8.840	0.703	0.491	0.325	0.564	0.413	0	1	0	0	0	0	a	a.165.1.1	A
d1j3aa_	129	129	24	21	17	8.568	0.632	0.576	0.409	0.447	0.500	0	0	1	0	0	0	c	c.21.1.1	A
d1j3ma_	127	127	28	19	15	7.980	0.824	0.462	0.388	0.574	0.437	0	1	0	0	0	0	d	d.129.7.1	A
d1j3wa_	134	134	24	23	14	7.728	0.649	0.570	0.436	0.706	0.516	0	0	1	0	0	0	d	d.110.7.1	A
d1j5ua1	124	124	35	23	12	9.660	1.000	0.564	0.370	0.609	0.474	0	0	1	0	0	0	d	d.208.1.1	A(7-130)
d1j6qa_	100	100	22	16	15	5.280	0.710	0.603	0.455	0.465	0.533	0	0	1	0	0	0	b	b.40.9.1	A
d1j8ua_	307	307	32	26	22	18.304	0.667	0.561	0.464	0.604	0.524	0	0	1	0	0	0	d	d.178.1.1	A
d1j98a_	154	154	27	24	16	10.368	0.675	0.551	0.395	0.533	0.480	0	0	1	0	0	0	d	d.185.1.2	A
d1jada_	242	242	84	17	14	19.992	2.710	0.498	0.348	0.680	0.434	0	1	0	0	0	1	h	h.4.10.1	A
d1jb0k_	46	46	25	10	6	1.500	1.562	0.451	0.374	0.612	0.415	0	1	0	0	0	0	f	f.30.1.1	K
d1jb3a_	127	127	27	17	16	7.344	0.818	0.574	0.444	0.590	0.522	0	0	1	0	0	0	b	b.40.3.2	A
d1jbia_	100	100	22	18	10	3.960	0.786	0.616	0.543	0.524	0.593	0	0	1	1	0	0	d	d.209.1.1	A
d1jcha3	139	139	67	10	10	6.700	3.350	0.540	0.450	0.758	0.509	0	0	1	0	0	1	h	h.4.9.1	A(316-454)
d1jcla1	251	251	29	23	18	12.006	0.707	0.613	0.513	0.639	0.578	0	0	1	1	0	0	c	c.1.10.1	A(1-251)
d1jfba_	399	399	34	32	23	25.024	0.618	0.489	0.425	0.413	0.467	0	1	0	0	0	0	a	a.104.1.1	A
d1jfla1	115	115	27	22	15	8.910	0.730	0.412	0.336	0.354	0.387	0	1	0	0	0	0	c	c.78.2.1	A(1-115)
d1jg1a_	215	215	28	21	18	10.584	0.718	0.589	0.504	0.517	0.554	0	0	1	1	0	0	c	c.66.1.7	A
d1jida_	114	114	25	20	15	7.500	0.714	0.571	0.423	0.622	0.512	0	0	1	0	0	0	d	d.201.1.1	A
d1jjcb4	104	104	30	16	13	6.240	1.034	0.512	0.398	0.469	0.465	0	0	1	0	0	0	d	d.58.13.1	B(682-785)
d1jjcb6	209	209	26	22	20	11.440	0.619	0.596	0.461	0.664	0.536	0	0	1	0	0	0	b	b.153.1.1	B(191-399)
d1jkea_	145	145	28	23	18	11.592	0.683	0.532	0.351	0.638	0.457	0	0	1	0	0	0	c	c.110.1.1	A
d1jlya1	153	153	22	19	18	7.524	0.595	0.601	0.529	0.381	0.575	0	0	1	1	0	0	b	b.42.3.1	A(1-153)
d1jm1a_	202	202	23	22	18	9.108	0.575	0.618	0.527	0.700	0.586	0	0	1	1	0	0	b	b.33.1.1	A
d1joca2	59	59	56	8	5	2.240	4.308	0.574	0.508	0.492	0.550	0	0	1	1	0	1	h	h.1.21.1	A(1289-1347)
d1jofa_	365	365	30	29	23	20.010	0.577	0.547	0.464	0.539	0.515	0	0	1	0	0	0	b	b.69.10.1	A
d1josa_	100	100	27	16	14	6.048	0.900	0.564	0.425	0.550	0.507	0	0	1	0	0	0	d	d.52.7.1	A
d1jr8a_	105	105	24	17	15	6.120	0.750	0.552	0.443	0.696	0.509	0	0	1	0	0	0	a	a.24.15.1	A
d1js8a2	101	101	27	18	11	5.346	0.931	0.592	0.466	0.622	0.540	0	0	1	0	0	0	b	b.112.1.1	A(2792-2892)
d1jv2b3	85	85	25	19	12	5.700	0.806	0.583	0.422	0.602	0.519	0	0	1	0	0	0	d	d.200.1.1	B(606-690)
d1jw9b_	240	240	29	24	22	15.312	0.630	0.547	0.407	0.585	0.493	0	0	1	0	0	0	c	c.111.1.1	B
d1jx4a1	101	101	25	14	13	4.550	0.926	0.611	0.538	0.700	0.588	0	0	1	1	0	0	d	d.240.1.1	A(241-341)
d1k04a_	142	142	42	31	13	16.926	0.955	0.159	0.191	0.012	0.175	1	0	0	0	1	0	a	a.24.14.1	A
d1k0ra4	99	99	30	20	15	9.000	0.857	0.348	0.289	0.594	0.336	1	0	0	0	0	0	d	d.202.1.1	A(1-99)
d1k18a_	31	31	14	10	7	0.980	0.824	0.711	0.606	0.767	0.671	0	0	1	1	0	0	g	g.67.1.1	A
d1k1fa_	67	67	35	13	10	4.550	1.522	0.169	0.254	0.017	0.212	1	0	0	0	1	0	a	a.147.1.1	A
d1k20a_	310	310	31	25	20	15.500	0.689	0.554	0.490	0.475	0.533	0	0	1	0	0	0	c	c.107.1.1	A
d1k24a_	249	249	44	20	16	14.080	1.222	0.492	0.444	0.141	0.472	0	1	0	0	0	0	f	f.4.4.2	A
d1k2aa_	136	136	24	20	17	8.160	0.649	0.542	0.431	0.428	0.492	0	0	1	0	0	0	d	d.5.1.1	A
d1k2yx1	150	150	20	19	15	5.700	0.588	0.610	0.556	0.531	0.595	0	0	1	1	0	0	c	c.84.1.1	X(5-154)
d1k2yx4	96	96	23	16	12	4.416	0.821	0.623	0.504	0.625	0.564	0	0	1	1	0	0	d	d.129.2.1	X(368-463)
d1k32a2	281	281	32	25	23	18.400	0.667	0.517	0.413	0.459	0.474	0	0	1	0	0	0	b	b.68.7.1	A(39-319)
d1k32a3	360	360	36	33	26	30.888	0.610	0.424	0.329	0.236	0.380	0	1	0	0	0	0	b	b.69.9.1	A(320-679)
d1k3xa1	89	89	21	15	12	3.780	0.778	0.595	0.523	0.552	0.568	0	0	1	1	0	0	a	a.156.1.2	A(125-213)
d1k3xa2	124	124	21	17	15	5.355	0.656	0.613	0.531	0.549	0.579	0	0	1	1	0	0	b	b.113.1.1	A(1-124)
d1k3xa3	40	40	20	12	11	2.640	0.870	0.463	0.373	0.685	0.433	0	1	0	0	0	0	g	g.39.1.8	A(223-262)
d1k4ia_	216	216	32	25	21	16.800	0.696	0.480	0.346	0.626	0.425	0	1	0	0	0	0	d	d.115.1.2	A
d1k4ta1	72	72	39	10	9	3.510	2.053	0.576	0.475	0.558	0.538	0	0	1	0	0	1	a	a.2.8.1	A(641-712)
d1k4za_	157	157	36	24	17	14.688	0.878	0.443	0.299	0.490	0.381	1	0	0	0	0	0	b	b.80.5.1	A
d1k5ca_	333	333	34	24	19	15.504	0.791	0.572	0.483	0.665	0.539	0	0	1	0	0	0	b	b.80.1.3	A
d1k5na2	181	181	31	22	16	10.912	0.816	0.539	0.438	0.563	0.499	0	0	1	0	0	0	d	d.19.1.1	A(1-181)
d1k6ka_	142	142	28	18	15	7.560	0.848	0.585	0.472	0.661	0.539	0	0	1	0	0	0	a	a.174.1.1	A
d1k8kd1	120	120	26	20	14	7.280	0.765	0.565	0.414	0.608	0.496	0	0	1	0	0	0	d	d.198.2.1	D(1-120)
d1k8ke_	174	174	26	20	18	9.360	0.684	0.603	0.482	0.582	0.553	0	0	1	0	0	0	a	a.148.1.1	E
d1k8kg_	139	139	38	18	18	12.312	1.056	0.286	0.265	0.149	0.281	1	0	0	0	0	0	a	a.118.13.1	G
d1k8ta_	498	498	62	35	31	67.270	0.939	0.339	0.231	0.536	0.294	1	0	0	0	0	0	e	e.41.1.1	A
d1k91a1	36	36	26	10	6	1.560	1.625	0.652	0.498	0.762	0.589	0	0	1	0	0	0	b	b.104.1.1	A(221-256)
d1k92a2	256	256	40	31	25	31.000	0.714	0.183	0.197	0.058	0.194	1	0	0	0	1	0	d	d.210.1.1	A(189-444)
d1ka1a_	354	354	33	24	23	18.216	0.702	0.583	0.499	0.615	0.557	0	0	1	0	0	0	e	e.7.1.1	A
d1kafa_	108	108	20	17	15	5.100	0.625	0.587	0.506	0.691	0.557	0	0	1	1	0	0	d	d.199.1.1	A
d1kb0a2	573	573	38	30	27	30.780	0.667	0.594	0.499	0.566	0.561	0	0	1	0	0	0	b	b.70.1.1	A(1-573)
d1kbla2	133	133	22	18	17	6.732	0.629	0.599	0.476	0.618	0.557	0	0	1	0	0	0	c	c.8.1.1	A(377-509)
d1kful2	159	159	31	23	14	9.982	0.838	0.627	0.443	0.523	0.541	0	0	1	0	0	0	b	b.14.1.1	L(356-514)
d1kg1a_	60	60	25	17	13	5.525	0.833	0.431	0.292	0.699	0.376	1	0	0	0	0	0	g	g.70.1.1	A
d1kjna_	152	152	23	19	16	6.992	0.657	0.608	0.520	0.537	0.575	0	0	1	1	0	0	c	c.115.1.1	A
d1kjqa1	74	74	23	13	10	2.990	1.000	0.636	0.528	0.638	0.586	0	0	1	1	0	0	b	b.84.2.1	A(319-392)
d1kjqa2	111	111	21	17	15	5.355	0.656	0.593	0.488	0.687	0.557	0	0	1	0	0	0	c	c.30.1.1	A(2-112)
d1kjqa3	203	203	30	20	18	10.800	0.789	0.491	0.454	0.498	0.485	0	1	0	0	0	0	d	d.142.1.2	A(113-318)
d1kl9a1	94	94	25	17	13	5.525	0.833	0.566	0.420	0.547	0.496	0	0	1	0	0	0	a	a.60.14.1	A(89-182)
d1kmiz_	177	177	75	41	16	49.200	1.316	0.200	0.112	0.210	0.159	1	0	0	0	0	0	h	h.4.11.1	Z
d1knla_	126	126	17	17	15	4.335	0.531	0.593	0.576	0.457	0.598	0	0	1	1	0	0	b	b.42.2.1	A
d1knza_	154	154	35	33	16	18.480	0.714	0.211	0.192	0.328	0.209	1	0	0	0	0	0	e	e.34.1.1	A
d1kp6a_	79	79	20	15	13	3.900	0.714	0.642	0.478	0.721	0.567	0	0	1	0	0	0	d	d.58.25.1	A
d1kpta_	105	105	21	15	14	4.410	0.724	0.634	0.526	0.574	0.585	0	0	1	1	0	0	d	d.70.1.1	A
d1kq6a_	140	140	32	22	14	9.856	0.889	0.587	0.420	0.543	0.514	0	0	1	0	0	0	d	d.189.1.1	A
d1kqfb2	45	45	41	10	6	2.460	2.562	0.320	0.335	0.364	0.331	0	1	0	0	1	1	f	f.23.22.1	B(246-290)
d1kqfc_	216	216	44	23	20	20.240	1.023	0.503	0.330	0.289	0.419	0	0	1	0	0	0	f	f.21.1.1	C
d1kqpa_	271	271	32	29	23	21.344	0.615	0.434	0.339	0.409	0.399	0	1	0	0	0	0	c	c.26.2.1	A
d1kx9a_	108	108	21	17	15	5.355	0.656	0.582	0.510	0.484	0.558	0	0	1	1	0	0	a	a.118.21.1	A
d1kzqa1	129	129	22	17	15	5.610	0.688	0.616	0.524	0.430	0.581	0	0	1	1	0	0	b	b.6.2.1	A(3-131)
d1l0qa1	90	90	26	15	10	3.900	1.040	0.581	0.487	0.506	0.538	0	0	1	0	0	0	b	b.1.3.1	A(302-391)
d1l0sa_	88	88	19	14	12	3.192	0.731	0.610	0.558	0.552	0.593	0	0	1	1	0	0	b	b.81.2.1	A
d1l0wa2	120	120	23	19	13	5.681	0.719	0.589	0.494	0.696	0.554	0	0	1	0	0	0	d	d.74.4.1	A(295-414)
d1l1la_	717	717	46	40	33	60.720	0.630	0.488	0.350	0.368	0.428	0	1	0	0	0	0	c	c.7.1.4	A
d1l2pa_	61	61	60	6	5	1.800	5.455	0.729	0.610	0.874	0.691	0	0	1	1	0	1	f	f.23.21.1	A
d1l3ka1	84	84	22	17	12	4.488	0.759	0.560	0.450	0.708	0.522	0	0	1	0	0	0	d	d.58.7.1	A(8-91)
d1l3la2	168	168	24	21	16	8.064	0.649	0.583	0.505	0.491	0.555	0	0	1	1	0	0	d	d.110.5.1	A(2-169)
d1l5ja1	160	160	31	21	15	9.765	0.861	0.425	0.378	0.480	0.414	0	1	0	0	0	0	a	a.118.15.1	A(1-160)
d1l6pa_	121	121	33	17	12	6.732	1.138	0.609	0.477	0.658	0.554	0	0	1	0	0	0	b	b.1.17.1	A
d1l8da_	103	103	50	12	11	6.600	2.174	0.446	0.389	0.376	0.430	0	1	0	0	0	1	h	h.4.12.1	A
d1l8wa_	271	271	38	22	18	15.048	0.950	0.522	0.418	0.611	0.486	0	0	1	0	0	0	a	a.154.1.1	A
d1l9la_	74	74	18	17	12	3.672	0.621	0.624	0.507	0.614	0.574	0	0	1	1	0	0	a	a.64.1.1	A
d1l9na2	114	114	30	15	12	5.400	1.111	0.587	0.493	0.657	0.546	0	0	1	0	0	0	b	b.1.5.1	A(480-593)
d1lc0a2	118	118	28	19	13	6.916	0.875	0.548	0.437	0.597	0.500	0	0	1	0	0	0	d	d.81.1.4	A(129-246)
d1ldja3	276	276	33	30	24	23.760	0.611	0.383	0.313	0.257	0.351	0	1	0	0	0	0	e	e.40.1.1	A(411-686)
d1lfpa_	243	243	29	25	19	13.775	0.659	0.479	0.434	0.276	0.461	0	1	0	0	0	0	e	e.39.1.1	A
d1lg7a_	164	164	28	19	17	9.044	0.778	0.611	0.474	0.740	0.554	0	0	1	0	0	0	d	d.213.1.1	A
d1lkka_	105	105	24	17	14	5.712	0.774	0.612	0.466	0.653	0.540	0	0	1	0	0	0	d	d.93.1.1	A
d1lkta_	104	104	26	19	16	7.904	0.743	0.331	0.307	0.197	0.324	0	1	0	0	0	0	b	b.90.1.1	A
d1llaa1	99	99	20	17	15	5.100	0.625	0.621	0.495	0.549	0.566	0	0	1	0	0	0	a	a.85.1.1	A(2-109)
d1lm5a_	189	189	26	21	18	9.828	0.667	0.637	0.492	0.690	0.575	0	0	1	0	0	0	d	d.211.2.1	A
d1lmia1	130	130	23	18	14	5.796	0.719	0.597	0.506	0.665	0.564	0	0	1	1	0	0	b	b.1.19.1	A(2-131)
d1ln4a1	97	97	21	16	14	4.704	0.700	0.613	0.516	0.689	0.578	0	0	1	1	0	0	d	d.68.4.1	A(1-97)
d1lnsa1	145	145	22	21	17	7.854	0.579	0.599	0.500	0.570	0.563	0	0	1	1	0	0	a	a.40.2.1	A(1-145)
d1lpba1	39	39	16	14	7	1.568	0.762	0.618	0.461	0.558	0.554	0	0	1	0	0	0	g	g.3.10.1	A(6-44)
d1lpva_	52	52	20	17	10	3.400	0.741	0.332	0.312	0.435	0.325	0	1	0	0	0	0	g	g.62.1.1	A
d1lqbc_	150	150	36	22	15	11.880	0.973	0.464	0.347	0.465	0.413	0	1	0	0	0	0	b	b.3.3.1	C
d1lqua2	238	238	30	26	20	15.600	0.652	0.550	0.414	0.649	0.496	0	0	1	0	0	0	c	c.4.1.1	A(2-108,325-456)
d1lrza1	65	65	33	10	9	2.970	1.737	0.638	0.541	0.572	0.603	0	0	1	1	0	0	a	a.2.7.4	A(245-309)
d1ls1a1	88	88	21	15	13	4.095	0.750	0.529	0.485	0.403	0.519	0	0	1	0	0	0	a	a.24.13.1	A(1-88)
d1lsha1	336	336	46	28	22	28.336	0.920	0.276	0.298	0.055	0.293	1	0	0	0	1	0	a	a.118.4.1	A(285-620)
d1lsha2	268	268	37	25	23	21.275	0.771	0.475	0.348	0.292	0.416	0	1	0	0	0	0	f	f.7.1.1	A(17-284)
d1lsla1	54	54	31	9	8	2.232	1.824	0.678	0.531	0.628	0.619	0	0	1	1	0	0	g	g.60.1.1	A(416-469)
d1lu0a_	29	29	12	10	8	0.960	0.667	0.648	0.524	0.679	0.595	0	0	1	1	0	0	g	g.3.2.1	A
d1luca_	326	326	30	25	22	16.500	0.638	0.540	0.479	0.521	0.521	0	0	1	0	0	0	c	c.1.16.1	A
d1m1ca_	651	651	59	31	26	47.554	1.035	0.576	0.409	0.626	0.503	0	0	1	0	0	0	e	e.42.1.1	A
d1m1eb_	65	65	52	15	13	10.140	1.857	0.258	0.164	0.171	0.210	1	0	0	0	0	0	a	a.161.1.1	B
d1m1ha1	81	81	20	14	12	3.360	0.769	0.613	0.552	0.472	0.590	0	0	1	1	0	0	b	b.114.1.1	A(51-131)
d1m1ha2	101	101	23	20	16	7.360	0.639	0.558	0.387	0.690	0.487	0	0	1	0	0	0	d	d.58.42.1	A(5-50,132-186)
d1m40a_	263	263	29	23	20	13.340	0.674	0.602	0.496	0.655	0.562	0	0	1	0	0	0	e	e.3.1.1	A
d1m55a_	193	193	28	22	20	12.320	0.667	0.607	0.448	0.566	0.538	0	0	1	0	0	0	d	d.89.1.3	A
d1m56d_	42	42	43	9	5	1.935	3.071	0.520	0.406	0.661	0.473	0	0	1	0	0	1	f	f.23.8.1	D
d1m5ia_	105	105	46	13	10	5.980	2.000	0.541	0.430	0.534	0.498	0	0	1	0	0	1	h	h.4.13.1	A
d1m5wa_	242	242	26	26	19	12.844	0.578	0.560	0.470	0.336	0.522	0	0	1	0	0	0	c	c.1.24.1	A
d1m65a_	234	234	25	22	18	9.900	0.625	0.614	0.548	0.563	0.592	0	0	1	1	0	0	c	c.6.3.1	A
d1mf7a1	192	192	25	19	18	8.550	0.676	0.616	0.548	0.717	0.593	0	0	1	1	0	0	c	c.62.1.1	A(128-319)
d1mg4a_	101	101	21	18	15	5.670	0.636	0.623	0.468	0.701	0.557	0	0	1	0	0	0	d	d.15.11.1	A
d1miwa1	265	265	50	21	19	19.950	1.250	0.421	0.343	0.376	0.389	0	1	0	0	0	0	a	a.173.1.1	A(140-404)
d1mk0a_	97	97	20	16	12	3.840	0.714	0.573	0.559	0.637	0.581	0	0	1	1	0	0	d	d.226.1.1	A
d1mkca_	43	43	16	11	8	1.408	0.842	0.675	0.567	0.775	0.636	0	0	1	1	0	0	g	g.5.1.2	A
d1mkfa_	371	371	41	31	25	31.775	0.732	0.516	0.340	0.641	0.438	0	0	1	0	0	0	b	b.116.1.1	A
d1mkya3	81	81	20	15	13	3.900	0.714	0.613	0.524	0.638	0.577	0	0	1	1	0	0	d	d.52.5.1	A(359-439)
d1mlaa1	235	235	26	23	20	11.960	0.605	0.553	0.476	0.646	0.530	0	0	1	0	0	0	c	c.19.1.1	A(3-127,198-307)
d1mlaa2	70	70	17	14	10	2.380	0.708	0.606	0.554	0.622	0.590	0	0	1	1	0	0	d	d.58.23.1	A(128-197)
d1mp1a1	108	108	21	20	15	6.300	0.600	0.635	0.471	0.746	0.569	0	0	1	0	0	0	a	a.188.1.1	A(27-134)
d1mpga2	99	99	28	15	14	5.880	0.966	0.522	0.413	0.709	0.480	0	0	1	0	0	0	d	d.129.1.2	A(1-99)
d1muna_	225	225	31	25	18	13.950	0.721	0.444	0.412	0.282	0.438	0	1	0	0	0	0	a	a.96.1.2	A
d1mv8a3	136	136	24	17	14	5.712	0.774	0.592	0.532	0.705	0.576	0	0	1	1	0	0	c	c.26.3.1	A(301-436)
d1mvfd_	44	44	17	15	12	3.060	0.630	0.320	0.289	0.487	0.305	1	0	0	0	0	0	b	b.129.1.1	D
d1mw5a1	154	154	35	18	16	10.080	1.029	0.543	0.401	0.629	0.479	0	0	1	0	0	0	d	d.259.1.1	A(3-156)
d1mw9x_	556	556	52	39	22	44.616	0.852	0.370	0.328	0.569	0.363	0	1	0	0	0	0	e	e.10.1.1	X
d1mwqa_	100	100	22	17	13	4.862	0.733	0.532	0.451	0.586	0.497	0	0	1	0	0	0	d	d.58.4.7	A
d1n2xa1	101	101	22	16	13	4.576	0.759	0.602	0.539	0.458	0.582	0	0	1	1	0	0	a	a.60.13.1	A(115-215)
d1n3la_	332	332	37	29	25	26.825	0.685	0.505	0.357	0.612	0.437	0	0	1	0	0	0	c	c.26.1.1	A
d1n4ka1	150	150	33	19	17	10.659	0.917	0.496	0.367	0.700	0.442	0	1	0	0	0	0	a	a.118.22.1	A(436-602)
d1n4wa1	367	367	38	26	22	21.736	0.792	0.444	0.409	0.341	0.437	0	1	0	0	0	0	c	c.3.1.2	A(9-318,451-507)
d1n4wa2	132	132	31	21	15	9.765	0.861	0.441	0.341	0.663	0.406	0	1	0	0	0	0	d	d.16.1.1	A(319-450)
d1n55a_	249	249	28	25	20	14.000	0.622	0.588	0.471	0.550	0.544	0	0	1	0	0	0	c	c.1.1.1	A
d1n62a1	82	82	20	16	12	3.840	0.714	0.609	0.478	0.584	0.552	0	0	1	0	0	0	a	a.56.1.1	A(82-163)
d1n62b1	141	141	51	23	16	18.768	1.308	0.201	0.184	0.037	0.192	1	0	0	0	0	0	d	d.41.1.1	B(6-146)
d1n62b2	663	663	52	41	28	59.696	0.754	0.581	0.344	0.588	0.466	0	0	1	0	0	0	d	d.133.1.1	B(147-809)
d1n62c1	109	109	23	16	12	4.416	0.821	0.630	0.526	0.602	0.584	0	0	1	1	0	0	d	d.87.2.1	C(178-286)
d1n62c2	177	177	27	19	16	8.208	0.771	0.552	0.489	0.473	0.528	0	0	1	0	0	0	d	d.145.1.3	C(1-177)
d1n6za_	105	105	33	16	12	6.336	1.179	0.556	0.439	0.606	0.510	0	0	1	0	0	0	d	d.263.1.1	A
d1n7va_	533	533	91	30	22	60.060	1.750	0.464	0.274	0.582	0.380	1	0	0	0	0	0	b	b.126.1.1	A
d1n7za_	328	328	44	31	26	35.464	0.772	0.363	0.266	0.526	0.322	1	0	0	0	0	0	b	b.127.1.1	A
d1n81a_	186	186	37	29	14	15.022	0.860	0.518	0.362	0.540	0.450	0	0	1	0	0	0	a	a.185.1.1	A
d1n91a1	100	100	21	18	14	5.292	0.656	0.503	0.428	0.541	0.480	0	0	1	0	0	0	d	d.206.1.1	A(1-100)
d1n93x_	335	335	50	39	25	48.750	0.781	0.276	0.199	0.236	0.242	1	0	0	0	0	0	a	a.206.1.1	X
d1na6a1	172	172	27	21	20	11.340	0.659	0.523	0.390	0.574	0.469	0	0	1	0	0	0	b	b.142.1.1	A(4-178)
d1nc7a1	114	114	28	20	12	6.720	0.875	0.591	0.453	0.642	0.536	0	0	1	0	0	0	b	b.123.1.1	A(1-114)
d1neia_	60	60	25	16	13	5.200	0.862	0.527	0.306	0.616	0.428	0	0	1	0	0	0	d	d.253.1.1	A
d1ng6a_	148	148	32	25	17	13.600	0.762	0.487	0.318	0.656	0.412	0	1	0	0	0	0	a	a.182.1.1	A
d1ng7a1	59	59	18	17	13	3.978	0.600	0.362	0.312	0.266	0.340	0	1	0	0	0	0	a	a.178.1.1	A(2-60)
d1nh1a_	290	290	34	27	19	17.442	0.739	0.491	0.418	0.344	0.460	0	1	0	0	0	0	e	e.45.1.1	A
d1nh2b_	46	46	23	13	7	2.093	1.150	0.581	0.497	0.375	0.551	0	0	1	0	0	0	a	a.32.1.1	B
d1nh2c_	50	50	22	17	10	3.740	0.815	0.192	0.251	0.001	0.216	1	0	0	0	1	0	b	b.56.1.1	C
d1njha1	106	106	20	17	17	5.780	0.588	0.542	0.445	0.628	0.504	0	0	1	0	0	0	b	b.128.1.1	A(1-116)
d1nkda_	59	59	29	10	9	2.610	1.526	0.603	0.522	0.480	0.569	0	0	1	1	0	0	a	a.30.1.1	A
d1nkia_	134	134	27	23	17	10.557	0.675	0.342	0.310	0.425	0.336	0	1	0	0	0	0	d	d.32.1.2	A
d1nkna_	74	74	67	12	6	4.824	3.722	0.235	0.300	0.075	0.274	1	0	0	0	1	1	h	h.1.26.1	A
d1nkza_	53	53	40	13	11	5.720	1.667	0.257	0.220	0.084	0.243	1	0	0	0	0	0	f	f.3.1.1	A
d1nlqa_	105	105	25	16	13	5.200	0.862	0.624	0.506	0.562	0.573	0	0	1	1	0	0	b	b.121.3.1	A
d1nlsa_	237	237	32	23	20	14.720	0.744	0.577	0.430	0.554	0.514	0	0	1	0	0	0	b	b.29.1.1	A
d1nlta3	74	74	32	17	9	4.896	1.231	0.484	0.353	0.548	0.421	0	1	0	0	0	0	g	g.54.1.1	A(139-212)
d1nnva_	107	107	27	20	14	7.560	0.794	0.579	0.398	0.751	0.500	0	0	1	0	0	0	d	d.17.7.1	A
d1nnxa_	93	93	23	17	15	5.865	0.719	0.613	0.419	0.627	0.516	0	0	1	0	0	0	b	b.40.10.1	A
d1no1a1	66	66	16	15	9	2.160	0.667	0.545	0.549	0.344	0.553	0	0	1	1	1	0	a	a.179.1.1	A(2-67)
d1no4a_	77	77	53	11	7	4.081	2.944	0.235	0.327	0.163	0.289	1	0	0	0	1	1	h	h.1.24.1	A
d1no7a_	542	542	47	29	24	32.712	0.887	0.585	0.450	0.579	0.532	0	0	1	0	0	0	e	e.48.1.1	A
d1nqua_	154	154	29	21	17	10.353	0.763	0.426	0.360	0.440	0.403	0	1	0	0	0	0	c	c.16.1.1	A
d1nr3a_	122	122	25	18	15	6.750	0.758	0.505	0.418	0.750	0.473	0	0	1	0	0	0	d	d.236.1.1	A
d1nrja_	147	147	29	19	17	9.367	0.806	0.555	0.417	0.639	0.496	0	0	1	0	0	0	d	d.110.4.4	A
d1ntha_	457	457	34	29	23	22.678	0.654	0.590	0.509	0.693	0.566	0	0	1	1	0	0	c	c.1.25.1	A
d1ntya1	184	184	32	27	14	12.096	0.780	0.591	0.424	0.652	0.515	0	0	1	0	0	0	a	a.87.1.1	A(1231-1414)
d1nu9c1	145	145	40	18	16	11.520	1.176	0.505	0.369	0.482	0.444	0	0	1	0	0	0	a	a.8.6.1	C(1-145)
d1nwza_	125	125	20	18	14	5.040	0.625	0.618	0.546	0.551	0.588	0	0	1	1	0	0	d	d.110.3.1	A
d1nxha_	124	124	36	15	14	7.560	1.241	0.403	0.389	0.155	0.398	0	1	0	0	0	0	a	a.200.1.1	A
d1nxia1	124	124	28	21	16	9.408	0.757	0.359	0.320	0.557	0.352	0	1	0	0	0	0	d	d.58.47.1	A(1-124)
d1nxja_	156	156	26	16	16	6.656	0.812	0.605	0.535	0.635	0.583	0	0	1	1	0	0	c	c.8.7.1	A
d1ny9a_	94	94	22	17	16	5.984	0.667	0.478	0.382	0.382	0.437	0	1	0	0	0	0	a	a.181.1.1	A
d1nyca1	109	109	22	21	16	7.392	0.595	0.583	0.402	0.503	0.496	0	0	1	0	0	0	b	b.61.2.2	A(1-109)
d1nyha_	76	76	74	8	5	2.960	5.692	0.555	0.485	0.440	0.528	0	0	1	0	0	1	h	h.1.23.1	A
d1nzea_	112	112	27	15	12	4.860	1.000	0.599	0.531	0.551	0.573	0	0	1	1	0	0	a	a.24.18.1	A
d1nzia1	114	114	25	18	15	6.750	0.758	0.634	0.456	0.601	0.549	0	0	1	0	0	0	b	b.23.1.1	A(1-117)
d1o22a_	149	149	33	28	16	14.784	0.750	0.380	0.281	0.532	0.342	1	0	0	0	0	0	d	d.238.1.1	A
d1o5ha_	200	200	36	22	18	14.256	0.900	0.569	0.380	0.621	0.486	0	0	1	0	0	0	a	a.191.1.1	A
d1o6aa_	87	87	33	20	15	9.900	0.943	0.297	0.224	0.565	0.267	1	0	0	0	0	0	b	b.139.1.1	A
d1o70a1	140	140	24	18	16	6.912	0.706	0.618	0.505	0.617	0.571	0	0	1	1	0	0	b	b.118.1.1	A(328-467)
d1o75a1	126	126	24	19	14	6.384	0.727	0.592	0.494	0.450	0.551	0	0	1	0	0	0	b	b.1.20.1	A(207-332)
d1o75a3	191	191	36	23	20	16.560	0.837	0.439	0.314	0.691	0.392	0	1	0	0	0	0	b	b.120.1.1	A(7-206)
d1o7ja_	325	325	36	26	20	18.720	0.783	0.542	0.451	0.656	0.516	0	0	1	0	0	0	c	c.88.1.1	A
d1o8ba1	96	96	26	16	13	5.408	0.897	0.565	0.428	0.621	0.514	0	0	1	0	0	0	c	c.124.1.4	A(23-126,199-218)
d1o8ba2	72	72	18	13	13	3.042	0.692	0.595	0.514	0.646	0.567	0	0	1	1	0	0	d	d.58.40.1	A(127-198)
d1o8ra_	94	94	20	16	13	4.160	0.690	0.584	0.491	0.625	0.549	0	0	1	0	0	0	d	d.234.1.1	A
d1o98a1	234	234	28	24	20	13.440	0.636	0.611	0.489	0.689	0.565	0	0	1	0	0	0	c	c.105.1.1	A(77-310)
d1oaca4	86	86	26	17	12	5.304	0.897	0.554	0.413	0.588	0.491	0	0	1	0	0	0	d	d.82.1.1	A(5-90)
d1oaia_	59	59	18	14	10	2.520	0.750	0.635	0.513	0.751	0.580	0	0	1	1	0	0	a	a.5.2.3	A
d1oc0b_	37	37	12	11	9	1.188	0.600	0.643	0.559	0.836	0.617	0	0	1	1	0	0	g	g.64.1.1	B
d1ocya_	198	198	53	26	22	30.316	1.104	0.262	0.181	0.253	0.224	1	0	0	0	0	0	d	d.231.1.1	A
d1odha_	158	158	34	20	16	10.880	0.944	0.548	0.390	0.660	0.475	0	0	1	0	0	0	d	d.239.1.1	A
d1oeda_	127	127	35	17	12	7.140	1.207	0.383	0.404	0.394	0.400	0	1	0	0	1	0	f	f.36.1.1	A
d1ofcx3	87	87	24	17	12	4.896	0.828	0.501	0.437	0.613	0.487	0	0	1	0	0	0	a	a.187.1.1	X(697-798)
d1ofda1	268	268	35	24	21	17.640	0.778	0.591	0.412	0.567	0.511	0	0	1	0	0	0	b	b.80.4.1	A(1240-1507)
d1ogmx1	199	199	31	25	19	14.725	0.705	0.479	0.355	0.642	0.430	0	1	0	0	0	0	b	b.133.1.1	X(3-201)
d1oh0a_	125	125	24	17	14	5.712	0.774	0.529	0.488	0.300	0.510	0	0	1	0	0	0	d	d.17.4.3	A
d1oi7a2	149	149	21	18	15	5.670	0.636	0.598	0.548	0.700	0.585	0	0	1	1	0	0	c	c.23.4.1	A(122-288)
d1oiga_	24	24	15	8	6	0.720	1.071	0.694	0.590	0.800	0.651	0	0	1	1	0	0	g	g.3.18.1	A
d1oisa_	221	221	36	25	21	18.900	0.783	0.414	0.333	0.533	0.385	0	1	0	0	0	0	e	e.15.1.1	A
d1ojha_	52	52	25	18	9	4.050	0.926	0.226	0.265	0.005	0.242	1	0	0	0	1	0	a	a.214.1.1	A
d1ok0a_	74	74	19	14	10	2.660	0.792	0.618	0.572	0.573	0.603	0	0	1	1	0	0	b	b.5.1.1	A
d1okca_	292	292	38	25	23	21.850	0.792	0.406	0.344	0.061	0.368	0	1	0	0	0	0	f	f.42.1.1	A
d1oksa1	49	49	17	12	9	1.836	0.810	0.594	0.543	0.448	0.575	0	0	1	1	0	0	a	a.8.5.1	A(2-50)
d1olza2	474	474	39	34	28	37.128	0.629	0.529	0.376	0.602	0.459	0	0	1	0	0	0	b	b.69.12.1	A(3-480)
d1olza3	56	56	16	14	11	2.464	0.640	0.646	0.493	0.502	0.579	0	0	1	0	0	0	g	g.16.2.1	A(481-536)
d1om2a_	95	95	38	17	15	9.690	1.188	0.406	0.274	0.639	0.351	1	0	0	0	0	0	a	a.23.4.1	A
d1on2a2	74	74	27	16	11	4.752	1.000	0.606	0.418	0.733	0.517	0	0	1	0	0	0	a	a.76.1.1	A(63-136)
d1oo0a_	144	144	25	24	14	8.400	0.658	0.558	0.458	0.623	0.516	0	0	1	0	0	0	d	d.232.1.1	A
d1oqja_	90	90	20	19	12	4.560	0.645	0.629	0.491	0.519	0.567	0	0	1	0	0	0	d	d.217.1.1	A
d1or7a2	111	111	40	16	14	8.960	1.333	0.421	0.324	0.699	0.391	0	1	0	0	0	0	a	a.177.1.1	A(1-111)
d1or7c_	66	66	22	19	12	5.016	0.710	0.328	0.314	0.140	0.325	0	1	0	0	0	0	a	a.180.1.1	C
d1orda3	161	161	38	21	12	9.576	1.152	0.565	0.430	0.442	0.500	0	0	1	0	0	0	d	d.125.1.1	A(570-730)
d1orua_	182	182	28	22	17	10.472	0.718	0.536	0.423	0.471	0.487	0	0	1	0	0	0	b	b.58.1.2	A
d1osya_	114	114	25	18	17	7.650	0.714	0.515	0.378	0.496	0.450	0	0	1	0	0	0	b	b.1.21.1	A
d1ou8a_	106	106	22	17	15	5.610	0.688	0.602	0.471	0.616	0.544	0	0	1	0	0	0	b	b.136.1.1	A
d1ouva1	263	263	49	27	20	26.460	1.043	0.309	0.262	0.105	0.289	1	0	0	0	0	0	a	a.118.18.1	A(28-290)
d1ov9a_	45	45	24	16	9	3.456	0.960	0.396	0.320	0.380	0.360	0	1	0	0	0	0	a	a.155.1.1	A
d1ow1a_	167	167	28	26	19	13.832	0.622	0.580	0.369	0.626	0.484	0	0	1	0	0	0	b	b.131.1.3	A
d1owla1	271	271	37	29	20	21.460	0.755	0.499	0.372	0.617	0.444	0	1	0	0	0	0	a	a.99.1.1	A(205-475)
d1owla2	202	202	30	27	19	15.390	0.652	0.466	0.347	0.472	0.416	0	1	0	0	0	0	c	c.28.1.1	A(3-204)
d1oxxk1	110	110	24	16	14	5.376	0.800	0.577	0.489	0.419	0.547	0	0	1	0	0	0	b	b.40.6.3	K(243-352)
d1p0ya1	172	172	50	22	13	14.300	1.429	0.492	0.329	0.568	0.420	0	1	0	0	0	0	a	a.166.1.1	A(311-482)
d1p35a_	299	299	40	29	21	24.360	0.800	0.504	0.368	0.599	0.447	0	0	1	0	0	0	b	b.28.1.1	A
d1p3da1	96	96	20	18	12	4.320	0.667	0.636	0.504	0.746	0.586	0	0	1	1	0	0	c	c.5.1.1	A(11-106)
d1p3da2	152	152	24	19	16	7.296	0.686	0.592	0.516	0.666	0.581	0	0	1	1	0	0	c	c.59.1.1	A(322-473)
d1p3da3	215	215	27	22	19	11.286	0.659	0.606	0.489	0.536	0.563	0	0	1	0	0	0	c	c.72.2.1	A(107-321)
d1p6oa_	156	156	24	18	16	6.912	0.706	0.631	0.536	0.512	0.593	0	0	1	1	0	0	c	c.97.1.2	A
d1p90a_	123	123	23	18	14	5.796	0.719	0.613	0.494	0.584	0.566	0	0	1	0	0	0	c	c.55.5.2	A
d1p9ga_	41	41	12	11	8	1.056	0.632	0.708	0.634	0.823	0.681	0	0	1	1	0	0	g	g.3.1.1	A
d1p9ha_	179	179	53	21	16	17.808	1.432	0.405	0.254	0.603	0.341	1	0	0	0	0	0	b	b.81.3.1	A
d1p9ya_	117	117	45	18	12	9.720	1.500	0.457	0.327	0.746	0.409	0	1	0	0	0	0	d	d.241.2.1	A
d1pb5a_	35	35	14	10	6	0.840	0.875	0.721	0.604	0.726	0.667	0	0	1	1	0	0	g	g.65.1.1	A
d1pbua_	162	162	27	21	16	9.072	0.730	0.621	0.485	0.589	0.565	0	0	1	0	0	0	d	d.58.46.1	A
d1pbya5	108	108	25	16	14	5.600	0.833	0.622	0.484	0.532	0.563	0	0	1	0	0	0	b	b.61.4.1	A(166-273)
d1pbyc_	79	79	20	19	14	5.320	0.606	0.427	0.351	0.432	0.393	0	1	0	0	0	0	a	a.137.9.1	C
d1pc6a_	141	141	33	30	18	17.820	0.688	0.198	0.185	0.062	0.194	1	0	0	0	0	0	d	d.262.1.1	A
d1pd0a1	102	102	30	17	14	7.140	0.968	0.557	0.405	0.693	0.497	0	0	1	0	0	0	a	a.71.2.1	A(647-753)
d1pd0a2	177	177	32	23	20	14.720	0.744	0.463	0.326	0.560	0.404	0	1	0	0	0	0	b	b.2.8.1	A(133-215,553-646)
d1pd0a4	155	155	36	24	18	15.552	0.857	0.427	0.290	0.518	0.370	1	0	0	0	0	0	d	d.109.2.1	A(754-926)
d1pd0a5	80	80	26	20	15	7.800	0.743	0.454	0.293	0.695	0.383	1	0	0	0	0	0	g	g.41.10.1	A(216-300)
d1pd3a_	54	54	26	13	7	2.366	1.300	0.649	0.545	0.455	0.605	0	0	1	1	0	0	a	a.30.3.1	A
d1pfoa1	361	361	44	33	17	24.684	0.880	0.532	0.397	0.510	0.472	0	0	1	0	0	0	f	f.69.1.1	A(30-390)
d1pfoa2	110	110	33	17	11	6.171	1.179	0.594	0.462	0.511	0.543	0	0	1	0	0	0	b	b.183.1.1	A(391-500)
d1pfva1	162	162	36	23	14	11.592	0.973	0.404	0.328	0.419	0.377	0	1	0	0	0	0	a	a.27.1.1	A(389-550)
d1pfva3	35	35	12	9	8	0.864	0.706	0.629	0.630	0.530	0.628	0	0	1	1	1	0	g	g.41.1.1	A(141-175)
d1pi1a1	184	184	33	27	17	15.147	0.750	0.589	0.379	0.603	0.493	0	0	1	0	0	0	a	a.29.7.1	A(12-195)
d1pm4a_	117	117	23	19	13	5.681	0.719	0.622	0.493	0.622	0.564	0	0	1	0	0	0	b	b.135.1.1	A
d1pp0a_	191	191	29	20	17	9.860	0.784	0.592	0.493	0.691	0.554	0	0	1	0	0	0	d	d.103.1.1	A
d1pprm1	156	156	24	21	17	8.568	0.632	0.251	0.362	0.020	0.310	1	0	0	0	1	0	a	a.131.1.1	M(1-156)
d1pu1a_	91	91	30	15	13	5.850	1.071	0.543	0.407	0.453	0.478	0	0	1	0	0	0	d	d.266.1.1	A
d1puca_	101	101	33	21	15	10.395	0.917	0.306	0.263	0.274	0.291	1	0	0	0	0	0	d	d.97.1.1	A
d1pv5a_	261	261	35	23	19	15.295	0.833	0.595	0.471	0.673	0.546	0	0	1	0	0	0	d	d.251.1.1	A
d1pvma3	36	36	18	10	8	1.440	1.000	0.631	0.523	0.592	0.589	0	0	1	1	0	0	g	g.41.13.1	A(143-178)
d1px5a1	146	146	30	21	14	8.820	0.857	0.624	0.457	0.539	0.549	0	0	1	0	0	0	a	a.160.1.2	A(201-346)
d1pxea_	48	48	15	13	9	1.755	0.682	0.630	0.442	0.589	0.536	0	0	1	0	0	0	g	g.73.1.1	A
d1pyya1	61	61	22	10	10	2.200	1.100	0.604	0.553	0.438	0.587	0	0	1	1	0	0	d	d.11.1.1	A(632-692)
d1pz4a1	110	110	23	17	14	5.474	0.742	0.528	0.493	0.457	0.518	0	0	1	0	0	0	d	d.106.1.1	A(1-110)
d1pzqa1	58	58	30	17	12	6.120	1.034	0.252	0.202	0.157	0.231	1	0	0	0	0	0	a	a.34.3.1	A(3-60)
d1pzra_	60	60	28	17	12	5.712	0.966	0.340	0.246	0.505	0.302	1	0	0	0	0	0	a	a.38.2.1	A
d1q16c_	224	224	40	28	24	26.880	0.769	0.336	0.254	0.386	0.305	1	0	0	0	0	0	f	f.21.3.1	C
d1q1va1	67	67	30	14	11	4.620	1.200	0.517	0.383	0.712	0.466	0	0	1	0	0	0	a	a.159.4.1	A(309-375)
d1q2ha_	63	63	31	16	11	5.456	1.148	0.330	0.280	0.403	0.317	1	0	0	0	0	0	a	a.34.4.1	A
d1q2za_	120	120	31	20	13	8.060	0.939	0.556	0.411	0.587	0.491	0	0	1	0	0	0	a	a.118.19.1	A
d1q3qa1	258	258	40	26	19	19.760	0.889	0.531	0.366	0.584	0.463	0	0	1	0	0	0	a	a.129.1.2	A(9-145,406-526)
d1q3qa3	107	107	25	15	11	4.125	0.962	0.598	0.561	0.534	0.592	0	0	1	1	0	0	d	d.56.1.2	A(146-216,370-405)
d1q5ya_	84	84	28	12	12	4.032	1.167	0.585	0.494	0.490	0.555	0	0	1	0	0	0	d	d.58.18.4	A
d1q5za_	145	145	25	21	17	8.925	0.658	0.594	0.436	0.488	0.523	0	0	1	0	0	0	a	a.196.1.1	A
d1q88a_	189	189	37	24	20	17.760	0.841	0.487	0.315	0.622	0.413	0	1	0	0	0	0	e	e.47.1.1	A
d1q8da_	100	100	22	18	15	5.940	0.667	0.590	0.433	0.634	0.523	0	0	1	0	0	0	a	a.228.1.1	A
d1q90a3	39	39	39	5	4	0.780	4.333	0.830	0.730	0.829	0.791	0	0	1	1	0	1	f	f.23.23.1	A(248-286)
d1qd1a1	179	179	24	22	14	7.392	0.667	0.622	0.558	0.612	0.606	0	0	1	1	0	0	d	d.58.34.1	A(2-180)
d1qd5a_	257	257	32	25	21	16.800	0.696	0.536	0.423	0.419	0.482	0	0	1	0	0	0	f	f.4.2.1	A
d1qexa_	288	288	78	32	27	67.392	1.322	0.136	0.109	0.012	0.118	1	0	0	0	0	0	b	b.32.1.1	A
d1qeya_	31	31	29	5	4	0.580	3.222	0.715	0.649	0.868	0.698	0	0	1	1	0	1	h	h.2.1.1	A
d1qf8a_	167	167	32	18	15	8.640	0.970	0.619	0.501	0.649	0.572	0	0	1	1	0	0	g	g.41.4.1	A
d1qhda1	213	213	32	22	19	13.376	0.780	0.593	0.432	0.691	0.521	0	0	1	0	0	0	a	a.115.1.2	A(1-148,333-397)
d1qksa2	432	432	33	31	25	25.575	0.589	0.567	0.470	0.381	0.533	0	0	1	0	0	0	b	b.70.2.1	A(136-567)
d1qmha1	95	95	29	14	12	4.872	1.115	0.594	0.468	0.752	0.541	0	0	1	0	0	0	c	c.47.2.1	A(185-279)
d1qoja_	46	46	22	9	6	1.188	1.467	0.611	0.640	0.572	0.629	0	0	1	1	1	0	a	a.2.9.1	A
d1qoya_	303	303	68	20	18	24.480	1.789	0.452	0.343	0.629	0.409	0	1	0	0	0	0	h	h.4.4.1	A
d1qsaa1	450	450	48	38	24	43.776	0.774	0.179	0.247	0.003	0.214	1	0	0	0	1	0	a	a.118.5.1	A(1-450)
d1qtsa1	133	133	26	19	15	7.410	0.765	0.526	0.432	0.561	0.495	0	0	1	0	0	0	b	b.1.10.1	A(692-824)
d1qtsa2	114	114	25	17	15	6.375	0.781	0.580	0.464	0.633	0.534	0	0	1	0	0	0	d	d.105.1.1	A(825-938)
d1qu7a_	227	227	116	18	10	20.880	4.143	0.264	0.245	0.063	0.254	1	0	0	0	0	1	h	h.4.5.1	A
d1qw2a1	95	95	20	18	13	4.680	0.645	0.591	0.486	0.720	0.553	0	0	1	0	0	0	d	d.249.1.1	A(20-114)
d1qwga_	251	251	31	25	19	14.725	0.705	0.598	0.457	0.624	0.536	0	0	1	0	0	0	c	c.1.27.1	A
d1qwya_	234	234	31	22	19	12.958	0.756	0.571	0.454	0.601	0.525	0	0	1	0	0	0	b	b.84.3.2	A
d1qwza1	214	214	27	23	19	11.799	0.643	0.593	0.486	0.618	0.553	0	0	1	0	0	0	b	b.100.1.1	A(31-244)
d1r0da_	194	194	44	20	14	12.320	1.294	0.615	0.437	0.569	0.534	0	0	1	0	0	0	a	a.216.1.1	A
d1r0ri_	51	51	14	13	9	1.638	0.636	0.682	0.560	0.847	0.625	0	0	1	1	0	0	g	g.68.1.1	I
d1r0va1	78	78	27	17	12	5.508	0.931	0.534	0.392	0.685	0.475	0	0	1	0	0	0	c	c.52.2.1	A(62-139)
d1r0va3	75	75	22	17	13	4.862	0.733	0.478	0.384	0.716	0.448	0	1	0	0	0	0	d	d.75.1.1	A(140-214)
d1r1ra1	218	218	38	25	18	17.100	0.884	0.554	0.382	0.439	0.473	0	0	1	0	0	0	a	a.98.1.1	A(4-221)
d1r29a_	122	122	27	26	18	12.636	0.614	0.378	0.283	0.454	0.341	1	0	0	0	0	0	d	d.42.1.1	A
d1r3ra_	356	356	34	25	24	20.400	0.694	0.562	0.477	0.585	0.535	0	0	1	0	0	0	c	c.1.22.1	A
d1r48a_	33	33	34	7	4	0.952	3.091	0.697	0.573	0.742	0.646	0	0	1	1	0	1	h	h.4.15.1	A
d1r5la1	66	66	24	14	11	3.696	0.960	0.498	0.421	0.655	0.477	0	1	0	0	0	0	a	a.5.3.1	A(25-90)
d1r5la2	185	185	23	21	20	9.660	0.561	0.533	0.485	0.584	0.522	0	0	1	0	0	0	c	c.13.1.1	A(91-275)
d1r5sa1	128	128	60	26	20	31.200	1.304	0.166	0.101	0.384	0.141	1	0	0	0	0	0	f	f.50.1.1	A(5-132)
d1r6ja1	77	77	19	15	11	3.135	0.731	0.565	0.518	0.443	0.553	0	0	1	1	0	0	b	b.36.1.1	A(197-273)
d1r75a_	110	110	29	19	12	6.612	0.935	0.590	0.445	0.535	0.530	0	0	1	0	0	0	b	b.134.1.1	A
d1r7la1	96	96	26	18	11	5.148	0.897	0.654	0.481	0.652	0.579	0	0	1	0	0	0	d	d.277.1.1	A(1-96)
d1r89a3	180	180	40	22	16	14.080	1.053	0.492	0.356	0.630	0.433	0	1	0	0	0	0	d	d.58.16.2	A(258-437)
d1r8ia_	187	187	47	19	14	12.502	1.424	0.518	0.380	0.720	0.462	0	0	1	0	0	0	a	a.8.7.1	A
d1r9fa1	119	119	29	18	12	6.264	0.967	0.594	0.467	0.697	0.543	0	0	1	0	0	0	d	d.255.1.1	A(27-148)
d1ra0a1	103	103	29	16	16	7.424	0.906	0.373	0.328	0.284	0.357	0	1	0	0	0	0	b	b.92.1.2	A(4-55,376-426)
d1ra0a2	320	320	29	27	24	18.792	0.569	0.609	0.467	0.596	0.549	0	0	1	0	0	0	c	c.1.9.5	A(56-375)
d1rcqa1	131	131	26	19	13	6.422	0.812	0.592	0.475	0.625	0.544	0	0	1	0	0	0	b	b.49.2.2	A(1-7,234-357)
d1rcqa2	226	226	27	22	16	9.504	0.711	0.600	0.540	0.550	0.578	0	0	1	1	0	0	c	c.1.6.1	A(8-233)
d1regx_	122	122	22	21	16	7.392	0.595	0.584	0.448	0.594	0.523	0	0	1	0	0	0	d	d.58.27.1	X
d1rf8b1	98	98	37	25	15	13.875	0.925	0.175	0.166	0.072	0.175	1	0	0	0	0	0	a	a.210.1.1	B(217-314)
d1rg8a1	137	137	19	18	16	5.472	0.559	0.590	0.554	0.380	0.577	0	0	1	1	0	0	b	b.42.1.1	A(1-137)
d1rh1a1	291	291	37	25	20	18.500	0.822	0.550	0.411	0.537	0.493	0	0	1	0	0	0	b	b.110.1.1	A(10-312)
d1rh5b_	56	56	41	22	7	6.314	1.414	0.094	0.172	0.023	0.139	1	0	0	0	1	0	f	f.23.28.1	B
d1rh5c_	32	32	32	9	6	1.728	2.133	0.396	0.349	0.125	0.369	0	1	0	0	0	1	f	f.17.6.1	C
d1ri6a1	330	330	29	26	22	16.588	0.604	0.550	0.495	0.430	0.535	0	0	1	0	0	0	b	b.69.11.1	A(4-333)
d1rjuv_	36	36	13	9	9	1.053	0.722	0.678	0.563	0.721	0.630	0	0	1	1	0	0	g	g.46.1.1	V
d1rk8c_	33	33	20	12	7	1.680	1.053	0.531	0.409	0.832	0.485	0	0	1	0	0	0	b	b.72.3.1	C
d1rkia1	98	98	25	17	13	5.525	0.833	0.620	0.477	0.637	0.560	0	0	1	0	0	0	d	d.308.1.2	A(1-98)
d1ro2a_	210	210	29	24	18	12.528	0.690	0.534	0.449	0.611	0.507	0	0	1	0	0	0	d	d.264.1.2	A
d1roca1	153	153	32	16	14	7.168	1.067	0.594	0.515	0.620	0.563	0	0	1	1	0	0	b	b.1.22.1	A(2-154)
d1rp3b_	77	77	40	15	12	7.200	1.481	0.120	0.184	0.001	0.151	1	0	0	0	1	0	a	a.137.11.1	B
d1rq6a_	62	62	23	16	11	4.048	0.852	0.389	0.345	0.498	0.378	0	1	0	0	0	0	a	a.4.15.1	A
d1rrza_	66	66	18	16	11	3.168	0.667	0.579	0.463	0.525	0.531	0	0	1	0	0	0	a	a.7.10.1	A
d1rssa_	140	140	36	20	16	11.520	1.000	0.473	0.347	0.700	0.425	0	1	0	0	0	0	a	a.75.1.1	A
d1rtqa_	291	291	27	24	19	12.312	0.628	0.606	0.549	0.606	0.589	0	0	1	1	0	0	c	c.56.5.4	A
d1rwaa1	369	369	33	27	23	20.493	0.660	0.503	0.453	0.262	0.489	0	0	1	0	0	0	a	a.102.3.2	A(4-372)
d1rwaa2	113	113	21	18	16	6.048	0.618	0.577	0.428	0.488	0.509	0	0	1	0	0	0	b	b.24.1.1	A(645-757)
d1ryla_	157	157	27	19	17	8.721	0.750	0.603	0.488	0.541	0.558	0	0	1	0	0	0	d	d.276.1.1	A
d1ryqa1	59	59	19	12	9	2.052	0.905	0.646	0.574	0.770	0.623	0	0	1	1	0	0	g	g.41.9.3	A(3-61)
d1s0pa_	176	176	32	17	16	8.704	0.970	0.596	0.511	0.582	0.566	0	0	1	1	0	0	a	a.192.1.1	A
d1s1cx1	67	67	64	8	5	2.560	4.923	0.603	0.513	0.671	0.568	0	0	1	1	0	1	h	h.1.27.1	X(947-1013)
d1s1da_	317	317	31	29	23	20.677	0.596	0.577	0.429	0.647	0.515	0	0	1	0	0	0	b	b.67.3.1	A
d1s2xa1	179	179	41	18	13	9.594	1.323	0.547	0.449	0.738	0.510	0	0	1	0	0	0	a	a.47.3.1	A(1-179)
d1s7ma_	158	158	44	28	18	22.176	0.957	0.231	0.174	0.255	0.206	1	0	0	0	0	0	b	b.144.1.1	A
d1s7za_	106	106	34	16	12	6.528	1.214	0.617	0.451	0.550	0.544	0	0	1	0	0	0	a	a.159.3.1	A
d1s99a_	186	186	29	22	18	11.484	0.725	0.609	0.436	0.520	0.532	0	0	1	0	0	0	d	d.58.48.2	A
d1saua_	114	114	23	15	14	4.830	0.793	0.610	0.569	0.691	0.606	0	0	1	1	0	0	d	d.203.1.1	A
d1sbxa1	103	103	29	16	14	6.496	0.967	0.477	0.374	0.688	0.441	0	1	0	0	0	0	a	a.6.1.4	A(90-192)
d1sdia1	212	212	28	23	23	14.812	0.609	0.584	0.405	0.506	0.507	0	0	1	0	0	0	a	a.198.1.1	A(2-213)
d1seda_	112	112	38	16	14	8.512	1.267	0.533	0.386	0.609	0.475	0	0	1	0	0	0	a	a.219.1.1	A
d1seia_	130	130	25	23	16	9.200	0.641	0.598	0.405	0.492	0.502	0	0	1	0	0	0	d	d.140.1.1	A
d1sf8a1	114	114	27	19	14	7.182	0.818	0.536	0.422	0.712	0.494	0	0	1	0	0	0	d	d.271.1.1	A(511-624)
d1sf9a1	104	104	26	19	16	7.904	0.743	0.448	0.351	0.392	0.408	0	1	0	0	0	0	b	b.34.15.1	A(25-128)
d1sg2a_	141	141	49	17	12	9.996	1.690	0.229	0.294	0.049	0.268	1	0	0	0	1	0	f	f.48.1.1	A
d1sg4a1	249	249	30	21	20	12.600	0.732	0.575	0.481	0.698	0.538	0	0	1	0	0	0	c	c.14.1.3	A(2-250)
d1sg7a1	75	75	26	13	12	4.056	1.040	0.700	0.497	0.740	0.613	0	0	1	0	0	0	a	a.239.1.1	A(22-96)
d1sgoa_	139	139	45	31	17	23.715	0.938	0.202	0.159	0.355	0.190	1	0	0	0	0	0	d	d.82.3.1	A
d1sj7a1	167	167	39	14	12	6.552	1.500	0.583	0.510	0.609	0.553	0	0	1	1	0	0	a	a.215.1.1	A(488-654)
d1sknp_	74	74	31	19	11	6.479	1.033	0.437	0.312	0.510	0.389	0	1	0	0	0	0	a	a.37.1.1	P
d1skva1	62	62	32	10	8	2.560	1.778	0.647	0.542	0.506	0.600	0	0	1	1	0	0	a	a.30.5.1	A(2-63)
d1slqa_	270	270	54	30	18	29.160	1.125	0.335	0.259	0.259	0.304	1	0	0	0	0	0	f	f.47.1.1	A
d1slua_	131	131	34	30	17	17.340	0.723	0.269	0.209	0.439	0.248	1	0	0	0	0	0	b	b.16.1.1	A
d1smba_	149	149	27	17	15	6.885	0.844	0.593	0.507	0.704	0.565	0	0	1	1	0	0	d	d.111.1.1	A
d1so9a_	131	131	32	15	14	6.720	1.103	0.562	0.460	0.501	0.513	0	0	1	0	0	0	b	b.146.1.1	A
d1sopa_	24	24	11	9	7	0.693	0.688	0.687	0.572	0.819	0.636	0	0	1	1	0	0	g	g.71.1.1	A
d1sr8a_	282	282	35	26	19	17.290	0.778	0.520	0.426	0.465	0.481	0	0	1	0	0	0	e	e.54.1.1	A
d1sr9a3	115	115	26	18	16	7.488	0.765	0.492	0.368	0.603	0.446	0	1	0	0	0	0	d	d.270.1.1	A(492-643)
d1srqa_	330	330	49	30	21	30.870	0.961	0.439	0.313	0.517	0.384	0	1	0	0	0	0	e	e.55.1.1	A
d1ss3a_	50	50	36	15	9	4.860	1.500	0.220	0.216	0.072	0.221	1	0	0	0	0	0	g	g.2.3.1	A
d1ss6a1	100	100	23	20	15	6.900	0.657	0.531	0.371	0.638	0.459	0	0	1	0	0	0	d	d.245.1.1	A(3-102)
d1syxb_	62	62	18	14	11	2.772	0.720	0.645	0.541	0.562	0.607	0	0	1	1	0	0	d	d.76.1.1	B
d1sz7a_	159	159	25	21	16	8.400	0.676	0.534	0.458	0.530	0.510	0	0	1	0	0	0	d	d.278.1.2	A
d1szha1	146	146	28	20	17	9.520	0.757	0.520	0.401	0.605	0.472	0	0	1	0	0	0	a	a.226.1.1	A(19-164)
d1szia_	194	194	43	20	16	13.760	1.194	0.416	0.359	0.484	0.400	0	1	0	0	0	0	a	a.24.23.1	A
d1t07a1	79	79	25	15	13	4.875	0.893	0.586	0.455	0.538	0.539	0	0	1	0	0	0	d	d.279.1.1	A(1-79)
d1t15a1	109	109	24	16	14	5.376	0.800	0.624	0.499	0.596	0.567	0	0	1	0	0	0	c	c.15.1.3	A(1649-1757)
d1t1ea2	179	179	47	31	16	23.312	1.000	0.188	0.187	0.077	0.193	1	0	0	0	0	0	d	d.58.3.2	A(12-190)
d1t1ua1	382	382	45	30	24	32.400	0.833	0.424	0.321	0.602	0.385	0	1	0	0	0	0	c	c.43.1.3	A(20-401)
d1t2da2	165	165	27	22	20	11.880	0.643	0.478	0.360	0.542	0.431	0	1	0	0	0	0	d	d.162.1.1	A(151-315)
d1t36a1	153	153	30	24	15	10.800	0.769	0.342	0.328	0.134	0.333	0	1	0	0	0	0	a	a.92.1.1	A(403-555)
d1t36b1	151	151	26	19	15	7.410	0.765	0.604	0.500	0.664	0.562	0	0	1	1	0	0	c	c.8.3.1	B(2-152)
d1t3ja_	62	62	61	7	5	2.135	5.083	0.636	0.549	0.548	0.608	0	0	1	1	0	1	h	h.4.16.1	A
d1t3ta1	68	68	24	18	12	5.184	0.800	0.519	0.340	0.688	0.436	0	0	1	0	0	0	a	a.5.10.1	A(153-220)
d1t50a_	58	58	19	17	8	2.584	0.760	0.563	0.455	0.602	0.516	0	0	1	0	0	0	g	g.63.1.1	A
d1t6aa_	124	124	54	20	18	19.440	1.421	0.220	0.165	0.396	0.201	1	0	0	0	0	0	d	d.129.8.1	A
d1t6fa_	37	37	37	5	5	0.925	3.700	0.762	0.657	0.818	0.728	0	0	1	1	0	1	h	h.1.28.1	A
d1t6ua_	117	117	30	17	13	6.630	1.000	0.610	0.468	0.485	0.545	0	0	1	0	0	0	a	a.24.22.1	A
d1t77a1	304	304	33	29	25	23.925	0.611	0.516	0.368	0.581	0.455	0	0	1	0	0	0	a	a.169.1.1	A(2186-2489)
d1t8ka_	77	77	17	16	11	2.992	0.630	0.596	0.553	0.344	0.574	0	0	1	1	0	0	a	a.28.1.1	A
d1t95a1	75	75	27	15	12	4.860	1.000	0.536	0.393	0.494	0.469	0	0	1	0	0	0	a	a.5.8.1	A(87-161)
d1t95a2	76	76	20	15	12	3.600	0.741	0.625	0.508	0.671	0.575	0	0	1	1	0	0	d	d.235.1.2	A(11-86)
d1t98a2	163	163	44	16	12	8.448	1.571	0.568	0.487	0.425	0.536	0	0	1	0	0	0	a	a.47.6.1	A(119-281)
d1tbaa_	67	67	31	14	12	5.208	1.192	0.436	0.313	0.551	0.387	0	1	0	0	0	0	a	a.15.1.1	A
d1tbfa_	326	326	33	29	23	22.011	0.635	0.538	0.421	0.557	0.492	0	0	1	0	0	0	a	a.211.1.2	A
d1td6a_	286	286	34	25	21	17.850	0.739	0.488	0.409	0.225	0.449	0	1	0	0	0	0	a	a.234.1.1	A
d1tf5a1	122	122	25	22	13	7.150	0.714	0.586	0.439	0.599	0.525	0	0	1	0	0	0	a	a.162.1.1	A(227-348)
d1tf5a2	210	210	58	29	13	21.866	1.381	0.451	0.294	0.673	0.386	1	0	0	0	0	0	a	a.172.1.1	A(571-780)
d1tfea_	142	142	33	21	16	11.088	0.892	0.539	0.356	0.687	0.457	0	0	1	0	0	0	d	d.43.1.1	A
d1tifa_	76	76	27	15	12	4.860	1.000	0.562	0.430	0.597	0.514	0	0	1	0	0	0	d	d.15.8.1	A
d1tiga_	88	88	23	15	11	3.795	0.885	0.604	0.528	0.442	0.568	0	0	1	1	0	0	d	d.68.1.1	A
d1tj2a1	100	100	46	29	17	22.678	1.000	0.069	0.087	0.001	0.076	1	0	0	0	1	0	a	a.176.1.1	A(89-261)
d1tjla1	104	104	37	16	10	5.920	1.423	0.450	0.398	0.489	0.427	0	1	0	0	0	0	a	a.2.14.1	A(7-110)
d1tjxa1	149	149	28	17	16	7.616	0.848	0.575	0.493	0.695	0.550	0	0	1	0	0	0	b	b.7.1.2	A(271-419)
d1tkea1	62	62	16	13	11	2.288	0.667	0.594	0.534	0.577	0.569	0	0	1	1	0	0	d	d.15.10.1	A(1-62)
d1tkea2	162	162	26	22	16	9.152	0.684	0.591	0.474	0.583	0.542	0	0	1	0	0	0	d	d.67.1.1	A(63-224)
d1tl2a_	235	235	27	26	17	11.934	0.628	0.543	0.497	0.216	0.529	0	0	1	0	0	0	b	b.67.1.1	A
d1tlha_	89	89	18	18	15	4.860	0.545	0.547	0.464	0.264	0.511	0	0	1	0	0	0	a	a.150.1.1	A
d1tlja_	189	189	32	20	18	11.520	0.842	0.471	0.406	0.553	0.447	0	1	0	0	0	0	d	d.282.1.1	A
d1tlwa1	248	248	35	26	19	17.290	0.778	0.499	0.400	0.294	0.455	0	1	0	0	0	0	f	f.4.6.1	A(9-272)
d1tm9a_	137	137	25	22	18	9.900	0.625	0.577	0.397	0.680	0.495	0	0	1	0	0	0	a	a.225.1.1	A
d1ts9a_	98	98	27	16	13	5.616	0.931	0.598	0.466	0.597	0.543	0	0	1	0	0	0	b	b.137.1.1	A
d1tt8a_	164	164	23	20	17	7.820	0.622	0.577	0.527	0.488	0.560	0	0	1	1	0	0	d	d.190.1.1	A
d1tula_	102	102	24	18	12	5.184	0.800	0.606	0.493	0.650	0.562	0	0	1	0	0	0	b	b.85.5.1	A
d1tv8a_	327	327	34	28	26	24.752	0.630	0.446	0.367	0.222	0.409	0	1	0	0	0	0	c	c.1.28.3	A
d1twda_	234	234	34	29	20	19.720	0.694	0.506	0.337	0.603	0.430	0	0	1	0	0	0	c	c.1.30.1	A
d1twfa_	1419	1419	75	69	44	227.700	0.664	0.283	0.187	0.533	0.243	1	0	0	0	0	0	e	e.29.1.2	A
d1twfc2	131	131	29	18	16	8.352	0.853	0.588	0.414	0.447	0.507	0	0	1	0	0	0	d	d.181.1.1	C(42-172)
d1twff_	84	84	28	14	12	4.704	1.077	0.584	0.458	0.524	0.528	0	0	1	0	0	0	a	a.143.1.2	F
d1twfj_	65	65	25	17	9	3.825	0.962	0.555	0.418	0.610	0.492	0	0	1	0	0	0	a	a.4.11.1	J
d1tx4a_	196	196	27	22	20	11.880	0.643	0.607	0.449	0.491	0.532	0	0	1	0	0	0	a	a.116.1.1	A
d1tx9a1	138	138	22	19	17	7.106	0.611	0.543	0.452	0.594	0.514	0	0	1	0	0	0	a	a.84.1.1	A(7-144)
d1tzpa_	240	240	33	22	20	14.520	0.786	0.578	0.450	0.686	0.527	0	0	1	0	0	0	d	d.65.1.3	A
d1tzva_	141	141	23	23	17	8.993	0.575	0.594	0.459	0.583	0.544	0	0	1	0	0	0	a	a.79.1.1	A
d1u07a_	90	90	33	18	12	7.128	1.100	0.372	0.311	0.241	0.348	0	1	0	0	0	0	d	d.212.1.2	A
d1u0sa_	86	86	21	13	12	3.276	0.840	0.580	0.560	0.372	0.576	0	0	1	1	0	0	d	d.58.24.1	A
d1u2ha_	96	96	25	14	12	4.200	0.962	0.596	0.508	0.623	0.560	0	0	1	1	0	0	b	b.1.1.0	A
d1u5ka2	157	157	28	19	16	8.512	0.800	0.591	0.477	0.591	0.543	0	0	1	0	0	0	g	g.45.1.2	A(81-237)
d1u5pa1	110	110	40	12	10	4.800	1.818	0.601	0.529	0.627	0.582	0	0	1	1	0	0	a	a.7.1.1	A(1662-1771)
d1u61a_	127	127	24	18	18	7.776	0.667	0.547	0.418	0.621	0.493	0	0	1	0	0	0	a	a.149.1.1	A
d1u6ka_	282	282	34	31	17	17.918	0.708	0.559	0.427	0.603	0.507	0	0	1	0	0	0	c	c.127.1.1	A
d1u7la_	364	364	72	26	20	37.440	1.565	0.370	0.270	0.490	0.325	1	0	0	0	0	0	e	e.57.1.1	A
d1u84a_	81	81	20	15	11	3.300	0.769	0.612	0.571	0.464	0.604	0	0	1	1	0	0	a	a.230.1.1	A
d1u94a2	60	60	18	12	11	2.376	0.783	0.594	0.549	0.411	0.582	0	0	1	1	0	0	d	d.48.1.1	A(269-328)
d1u9la_	68	68	19	16	9	2.736	0.760	0.601	0.533	0.419	0.571	0	0	1	1	0	0	a	a.60.4.2	A
d1uc4a_	551	551	49	39	31	59.241	0.700	0.434	0.279	0.638	0.371	1	0	0	0	0	0	c	c.1.19.3	A
d1uc4b_	178	178	25	20	16	8.000	0.694	0.593	0.506	0.714	0.560	0	0	1	1	0	0	c	c.51.3.1	B
d1uc4g_	137	137	34	23	16	12.512	0.872	0.390	0.300	0.229	0.348	0	1	0	0	0	0	a	a.23.2.1	G
d1ucda_	190	190	26	21	19	10.374	0.650	0.579	0.482	0.622	0.549	0	0	1	0	0	0	d	d.124.1.1	A
d1ucsa_	64	64	16	13	11	2.288	0.667	0.601	0.571	0.641	0.598	0	0	1	1	0	0	b	b.85.1.1	A
d1ud9a1	119	119	24	17	15	6.120	0.750	0.546	0.480	0.363	0.516	0	0	1	0	0	0	d	d.131.1.2	A(1-119)
d1udxa1	156	156	46	18	15	12.420	1.394	0.545	0.343	0.705	0.452	0	0	1	0	0	0	b	b.117.1.1	A(1-156)
d1udxa3	76	76	21	17	13	4.641	0.700	0.547	0.435	0.467	0.505	0	0	1	0	0	0	d	d.242.1.1	A(341-416)
d1ueba1	63	63	23	12	10	2.760	1.045	0.637	0.534	0.482	0.597	0	0	1	1	0	0	b	b.34.5.2	A(1-63)
d1ufia1	46	46	19	15	9	2.565	0.792	0.499	0.419	0.646	0.466	0	1	0	0	0	0	a	a.30.4.1	A(5-50)
d1ufya_	121	121	23	22	14	7.084	0.639	0.568	0.434	0.705	0.513	0	0	1	0	0	0	d	d.79.1.2	A
d1ufza1	70	70	29	15	11	4.785	1.115	0.339	0.323	0.477	0.342	0	1	0	0	0	0	a	a.5.9.1	A(8-77)
d1ug7a1	115	115	28	17	16	7.616	0.848	0.651	0.450	0.628	0.561	0	0	1	0	0	0	a	a.24.24.1	A(8-122)
d1ugia_	83	83	19	16	12	3.648	0.679	0.571	0.504	0.678	0.550	0	0	1	1	0	0	d	d.17.5.1	A
d1uj8a1	64	64	16	14	11	2.464	0.640	0.620	0.584	0.567	0.612	0	0	1	1	0	0	a	a.159.5.1	A(13-76)
d1um0a_	365	365	42	30	25	31.500	0.764	0.494	0.330	0.555	0.420	0	1	0	0	0	0	d	d.258.1.1	A
d1uoya_	64	64	16	14	11	2.464	0.640	0.634	0.527	0.578	0.596	0	0	1	1	0	0	g	g.3.19.1	A
d1uptb_	58	58	26	15	7	2.730	1.182	0.540	0.479	0.521	0.528	0	0	1	0	0	0	a	a.193.1.1	B
d1urja_	1029	1029	56	50	38	106.400	0.636	0.409	0.279	0.572	0.358	1	0	0	0	0	0	e	e.58.1.1	A
d1us0a_	314	314	32	28	24	21.504	0.615	0.588	0.438	0.506	0.529	0	0	1	0	0	0	c	c.1.7.1	A
d1us6a_	91	91	32	18	10	5.760	1.143	0.540	0.389	0.698	0.475	0	0	1	0	0	0	a	a.2.13.1	A
d1us7b_	194	194	62	22	17	23.188	1.590	0.315	0.240	0.446	0.288	1	0	0	0	0	0	a	a.205.1.1	B
d1usda_	42	42	43	7	6	1.806	3.308	0.650	0.491	0.806	0.580	0	0	1	0	0	1	h	h.1.29.1	A
d1usma_	77	77	20	13	13	3.380	0.769	0.646	0.539	0.632	0.603	0	0	1	1	0	0	d	d.74.1.1	A
d1usub_	132	132	35	14	12	5.880	1.346	0.585	0.537	0.394	0.572	0	0	1	1	0	0	d	d.83.2.1	B
d1ut7a1	144	144	34	25	20	17.000	0.756	0.473	0.282	0.615	0.389	1	0	0	0	0	0	b	b.143.1.1	A(1-163)
d1utga_	70	70	21	17	10	3.570	0.778	0.408	0.403	0.289	0.421	0	1	0	0	0	0	a	a.101.1.1	A
d1utya_	153	153	38	19	18	12.996	1.027	0.477	0.321	0.569	0.406	0	1	0	0	0	0	b	b.147.1.1	A
d1uuja_	76	76	33	16	12	6.336	1.179	0.305	0.285	0.345	0.295	1	0	0	0	0	0	a	a.221.1.1	A
d1uuya_	161	161	22	20	17	7.480	0.595	0.577	0.491	0.572	0.546	0	0	1	0	0	0	c	c.57.1.1	A
d1uv7a_	76	76	20	13	11	2.860	0.833	0.584	0.566	0.476	0.579	0	0	1	1	0	0	d	d.67.4.1	A
d1uwka_	554	554	38	30	28	31.920	0.655	0.587	0.463	0.452	0.537	0	0	1	0	0	0	e	e.51.1.1	A
d1ux6a2	124	124	31	18	14	7.812	0.969	0.414	0.367	0.340	0.401	0	1	0	0	0	0	g	g.75.1.1	A(813-936)
d1uxya2	142	142	30	25	17	12.750	0.714	0.369	0.284	0.501	0.337	1	0	0	0	0	0	d	d.146.1.1	A(201-342)
d1uynx_	279	279	43	19	18	14.706	1.162	0.514	0.431	0.565	0.484	0	0	1	0	0	0	f	f.4.5.1	X
d1uz3a_	102	102	46	18	13	10.764	1.484	0.486	0.280	0.667	0.390	1	0	0	0	0	0	a	a.283.1.1	A
d1uzka3	66	66	19	15	10	2.850	0.760	0.595	0.481	0.642	0.555	0	0	1	0	0	0	g	g.23.1.1	A(1529-1604)
d1v0wa1	256	256	31	28	24	20.832	0.596	0.474	0.333	0.520	0.412	0	1	0	0	0	0	d	d.136.1.2	A(6-263)
d1v2za1	105	105	27	19	14	7.182	0.818	0.609	0.417	0.593	0.520	0	0	1	0	0	0	a	a.186.1.1	A(174-278)
d1v30a1	110	110	20	16	14	4.480	0.667	0.589	0.560	0.609	0.582	0	0	1	1	0	0	d	d.269.1.1	A(7-116)
d1v37a_	171	171	23	20	17	7.820	0.622	0.539	0.510	0.683	0.535	0	0	1	1	0	0	c	c.60.1.1	A
d1v58a2	60	60	20	17	9	3.060	0.769	0.523	0.435	0.706	0.498	0	0	1	0	0	0	d	d.17.3.1	A(2-61)
d1v5ra1	84	84	20	19	15	5.700	0.588	0.541	0.386	0.600	0.472	0	0	1	0	0	0	d	d.82.4.1	A(8-91)
d1v65a1	51	51	34	18	17	10.404	0.971	0.081	0.116	0.005	0.100	1	0	0	0	1	0	a	a.212.1.1	A(8-58)
d1v6pa_	62	62	23	14	8	2.576	1.045	0.690	0.534	0.611	0.621	0	0	1	1	0	0	g	g.7.1.1	A
d1v74b_	87	87	25	15	13	4.875	0.893	0.621	0.481	0.563	0.564	0	0	1	0	0	0	a	a.24.20.1	B
d1v7za_	257	257	34	24	19	15.504	0.791	0.581	0.444	0.652	0.525	0	0	1	0	0	0	c	c.125.1.1	A
d1v8ca2	78	78	24	13	12	3.744	0.960	0.567	0.487	0.476	0.541	0	0	1	0	0	0	d	d.129.5.1	A(88-165)
d1v9da_	308	308	75	32	20	48.000	1.442	0.214	0.183	0.037	0.198	1	0	0	0	0	0	a	a.207.1.1	A
d1v9ja1	86	86	23	18	13	5.382	0.742	0.503	0.387	0.646	0.450	0	0	1	0	0	0	d	d.52.6.1	A(28-113)
d1v9ma_	312	312	29	25	24	17.400	0.592	0.541	0.455	0.483	0.504	0	0	1	0	0	0	f	f.40.1.1	A
d1vaja1	203	203	29	21	18	10.962	0.744	0.563	0.470	0.617	0.528	0	0	1	0	0	0	d	d.309.1.1	A(3-205)
d1vbwa_	68	68	19	16	9	2.736	0.760	0.616	0.542	0.630	0.595	0	0	1	1	0	0	d	d.40.1.1	A
d1vcca_	77	77	19	18	11	3.762	0.655	0.626	0.509	0.667	0.575	0	0	1	1	0	0	d	d.121.1.1	A
d1vcta1	99	99	35	17	10	5.950	1.296	0.633	0.444	0.653	0.546	0	0	1	0	0	0	a	a.7.12.1	A(9-107)
d1vd6a_	218	218	27	21	19	10.773	0.675	0.609	0.496	0.569	0.558	0	0	1	0	0	0	c	c.1.18.3	A
d1vdza2	77	77	24	13	12	3.744	0.960	0.572	0.491	0.461	0.543	0	0	1	0	0	0	b	b.84.5.1	A(114-190)
d1vf6a_	58	58	35	14	10	4.900	1.458	0.292	0.280	0.121	0.290	1	0	0	0	0	0	a	a.194.1.1	A
d1vf7a_	237	237	56	27	19	28.728	1.217	0.207	0.198	0.024	0.201	1	0	0	0	0	0	f	f.46.1.1	A
d1vfia1	91	91	32	15	13	6.240	1.143	0.348	0.324	0.434	0.344	0	1	0	0	0	0	g	g.84.1.1	A(5-95)
d1vh4a_	410	410	38	30	27	30.780	0.667	0.566	0.385	0.510	0.484	0	0	1	0	0	0	b	b.80.6.1	A
d1vi6a_	193	193	31	22	18	12.276	0.775	0.625	0.450	0.599	0.546	0	0	1	0	0	0	c	c.23.15.1	A
d1viba_	55	55	26	9	7	1.638	1.625	0.630	0.584	0.763	0.620	0	0	1	1	0	0	g	g.2.2.1	A
d1vioa2	56	56	15	12	10	1.800	0.682	0.619	0.577	0.524	0.605	0	0	1	1	0	0	d	d.66.1.5	A(2-57)
d1vjfa_	168	168	23	22	17	8.602	0.590	0.526	0.461	0.642	0.511	0	0	1	0	0	0	d	d.116.1.1	A
d1vjla1	142	142	29	22	16	10.208	0.763	0.584	0.396	0.646	0.496	0	0	1	0	0	0	d	d.257.1.1	A(1-150)
d1vk1a_	232	232	30	22	20	13.200	0.714	0.526	0.449	0.435	0.498	0	0	1	0	0	0	d	d.268.1.2	A
d1vkea_	117	117	24	21	20	10.080	0.585	0.479	0.326	0.704	0.419	0	1	0	0	0	0	a	a.152.1.2	A
d1vkfa_	172	172	26	21	14	7.644	0.743	0.595	0.522	0.499	0.572	0	0	1	1	0	0	c	c.1.29.1	A
d1vkma1	284	284	28	24	21	14.112	0.622	0.573	0.491	0.487	0.540	0	0	1	0	0	0	c	c.138.1.1	A(1-284)
d1vkya_	280	280	39	25	20	19.500	0.867	0.446	0.384	0.559	0.431	0	1	0	0	0	0	e	e.53.1.1	A
d1vlra2	101	101	35	19	15	9.975	1.029	0.309	0.261	0.363	0.292	1	0	0	0	0	0	d	d.246.1.1	A(39-145)
d1vlya1	82	82	21	20	12	5.040	0.656	0.582	0.434	0.617	0.524	0	0	1	0	0	0	b	b.44.2.1	A(244-325)
d1vlya2	241	241	32	25	18	14.400	0.744	0.582	0.449	0.651	0.524	0	0	1	0	0	0	d	d.250.1.1	A(3-243)
d1vmba_	107	107	30	19	15	8.550	0.882	0.573	0.393	0.592	0.492	0	0	1	0	0	0	d	d.58.14.1	A
d1vmha_	129	129	29	17	13	6.409	0.967	0.620	0.484	0.697	0.565	0	0	1	0	0	0	d	d.273.1.1	A
d1vmoa_	163	163	27	20	16	8.640	0.750	0.577	0.473	0.474	0.541	0	0	1	0	0	0	b	b.77.1.1	A
d1vnsa_	574	574	37	33	27	32.967	0.617	0.600	0.477	0.587	0.553	0	0	1	0	0	0	a	a.111.1.3	A
d1vp7a_	68	68	38	13	8	3.952	1.810	0.522	0.388	0.599	0.471	0	0	1	0	0	0	a	a.7.13.1	A
d1vp8a1	189	189	28	23	18	11.592	0.683	0.571	0.437	0.653	0.515	0	0	1	0	0	0	c	c.49.1.2	A(1-189)
d1vpqa1	259	259	29	22	21	13.398	0.674	0.577	0.504	0.611	0.553	0	0	1	1	0	0	c	c.1.32.1	A(1-259)
d1vq0a1	230	230	29	25	18	13.050	0.674	0.579	0.453	0.530	0.525	0	0	1	0	0	0	d	d.193.1.1	A(1-230)
d1vq0a2	57	57	20	13	9	2.340	0.909	0.583	0.486	0.667	0.532	0	0	1	0	0	0	g	g.81.1.1	A(231-287)
d1vq811	56	56	29	18	10	5.220	1.036	0.238	0.228	0.097	0.235	1	0	0	0	0	0	g	g.41.8.2	1(1-56)
d1vq821	46	46	26	15	8	3.120	1.130	0.481	0.337	0.418	0.414	0	1	0	0	0	0	a	a.137.1.1	2(1-49)
d1vq8e1	79	79	21	14	11	3.234	0.840	0.608	0.522	0.598	0.571	0	0	1	1	0	0	d	d.141.1.1	E(1-79)
d1vq8h1	152	152	34	17	16	9.248	1.030	0.568	0.428	0.529	0.510	0	0	1	0	0	0	d	d.41.4.1	H(1-163)
d1vq8l1	145	145	48	27	17	22.032	1.091	0.069	0.133	0.000	0.102	1	0	0	0	1	0	c	c.12.1.1	L(1-150)
d1vq8n1	186	186	41	25	18	18.450	0.953	0.428	0.286	0.459	0.364	1	0	0	0	0	0	c	c.55.4.1	N(1-186)
d1vq8p1	143	143	58	22	15	19.140	1.568	0.093	0.151	0.001	0.123	1	0	0	0	1	0	a	a.94.1.1	P(1-143)
d1vq8v1	65	65	24	11	9	2.376	1.200	0.592	0.531	0.585	0.565	0	0	1	1	0	0	a	a.2.2.1	V(1-65)
d1vq8w1	154	154	25	19	16	7.600	0.714	0.569	0.489	0.642	0.544	0	0	1	0	0	0	d	d.59.1.1	W(1-154)
d1vq8x1	82	82	23	13	11	3.289	0.958	0.602	0.526	0.663	0.569	0	0	1	1	0	0	d	d.29.1.1	X(7-88)
d1vq8y1	142	142	39	23	19	17.043	0.929	0.254	0.217	0.166	0.241	1	0	0	0	0	0	c	c.9.2.1	Y(95-236)
d1vr0a1	235	235	31	20	18	11.160	0.816	0.614	0.523	0.651	0.582	0	0	1	1	0	0	c	c.148.1.1	A(1-235)
d1vr4a1	103	103	30	20	12	7.200	0.938	0.415	0.343	0.444	0.385	0	1	0	0	0	0	d	d.230.5.1	A(1-103)
d1vr7a_	120	120	29	15	14	6.090	1.000	0.591	0.477	0.620	0.545	0	0	1	0	0	0	d	d.156.1.2	A
d1vr8a1	127	127	21	19	16	6.384	0.600	0.614	0.519	0.585	0.580	0	0	1	1	0	0	d	d.312.1.1	A(25-154)
d1vrma1	309	309	32	29	22	20.416	0.627	0.515	0.402	0.585	0.468	0	0	1	0	0	0	d	d.96.2.1	A(44-352)
d1vsga_	362	362	68	29	19	37.468	1.417	0.452	0.281	0.618	0.380	1	0	0	0	0	0	h	h.4.1.1	A
d1vyia_	111	111	30	16	13	6.240	1.034	0.608	0.464	0.530	0.545	0	0	1	0	0	0	d	d.293.1.1	A
d1vyra_	363	363	29	28	21	17.052	0.592	0.570	0.513	0.568	0.553	0	0	1	1	0	0	c	c.1.4.1	A
d1w0na_	120	120	23	14	14	4.508	0.821	0.607	0.558	0.484	0.587	0	0	1	1	0	0	b	b.18.1.28	A
d1w26a1	185	185	33	28	23	21.252	0.647	0.191	0.209	0.003	0.196	1	0	0	0	1	0	a	a.223.1.1	A(248-432)
d1w41a1	99	99	18	16	13	3.744	0.621	0.604	0.535	0.633	0.582	0	0	1	1	0	0	d	d.79.3.1	A(1-99)
d1w66a1	216	216	28	21	18	10.584	0.718	0.560	0.479	0.574	0.528	0	0	1	0	0	0	d	d.104.1.3	A(1-216)
d1w7ca1	464	464	53	36	31	59.148	0.791	0.326	0.231	0.293	0.282	1	0	0	0	0	0	b	b.30.2.1	A(316-779)
d1w7ca2	127	127	45	24	18	19.440	1.071	0.265	0.185	0.399	0.232	1	0	0	0	0	0	d	d.17.2.1	A(43-169)
d1w7ja1	61	61	18	14	10	2.520	0.750	0.551	0.463	0.402	0.512	0	0	1	0	0	0	b	b.34.3.1	A(2-62)
d1wb9a1	297	297	58	26	19	28.652	1.289	0.289	0.251	0.290	0.274	1	0	0	0	0	0	a	a.113.1.1	A(270-566)
d1wb9a3	153	153	24	21	18	9.072	0.615	0.596	0.444	0.657	0.528	0	0	1	0	0	0	c	c.55.6.1	A(117-269)
d1wb9a4	115	115	25	21	13	6.825	0.735	0.588	0.437	0.504	0.524	0	0	1	0	0	0	d	d.75.2.1	A(2-116)
d1wcwa1	252	252	40	21	20	16.800	0.976	0.518	0.406	0.421	0.470	0	0	1	0	0	0	c	c.113.1.1	A(10-261)
d1wdda1	325	325	30	27	22	17.820	0.612	0.602	0.469	0.682	0.543	0	0	1	0	0	0	c	c.1.14.1	A(151-475)
d1wdda2	140	140	27	24	15	9.720	0.692	0.600	0.403	0.616	0.512	0	0	1	0	0	0	d	d.58.9.1	A(11-150)
d1wdds_	122	122	30	23	19	13.110	0.714	0.368	0.269	0.332	0.326	1	0	0	0	0	0	d	d.73.1.1	S
d1wdfa_	91	91	53	12	10	6.360	2.409	0.487	0.358	0.585	0.429	0	1	0	0	0	1	h	h.3.3.1	A
d1wfea1	73	73	52	24	12	14.976	1.444	0.195	0.131	0.105	0.161	1	0	0	0	0	0	g	g.80.1.1	A(8-80)
d1whia_	122	122	25	18	14	6.300	0.781	0.560	0.461	0.683	0.524	0	0	1	0	0	0	b	b.39.1.1	A
d1whua1	91	91	31	22	17	11.594	0.795	0.379	0.240	0.700	0.323	1	0	0	0	0	0	a	a.4.9.1	A(274-364)
d1whza_	70	70	20	15	10	3.000	0.800	0.595	0.554	0.402	0.581	0	0	1	1	0	0	d	d.50.3.2	A
d1wina1	130	130	43	17	12	8.772	1.483	0.578	0.418	0.541	0.508	0	0	1	0	0	0	d	d.43.2.1	A(8-137)
d1wixa1	151	151	24	18	16	6.912	0.706	0.646	0.538	0.619	0.604	0	0	1	1	0	0	a	a.40.3.1	A(8-158)
d1wj0a_	58	58	19	13	10	2.470	0.826	0.643	0.546	0.548	0.607	0	0	1	1	0	0	g	g.72.1.1	A
d1wjta1	90	90	30	20	13	7.800	0.909	0.471	0.318	0.796	0.411	0	1	0	0	0	0	a	a.48.3.1	A(8-97)
d1wjxa_	112	112	22	18	16	6.336	0.647	0.599	0.469	0.511	0.543	0	0	1	0	0	0	b	b.111.1.1	A
d1wl6a1	176	176	30	26	18	14.040	0.682	0.540	0.363	0.681	0.460	0	0	1	0	0	0	c	c.55.2.1	A(1-176)
d1wlga_	293	293	57	25	16	22.800	1.390	0.382	0.322	0.189	0.361	0	1	0	0	0	0	b	b.152.1.1	A
d1wmib1	61	61	26	23	17	10.166	0.650	0.056	0.105	0.013	0.081	1	0	0	0	1	0	a	a.137.13.1	B(7-67)
d1wn2a_	118	118	24	15	15	5.400	0.800	0.632	0.521	0.652	0.588	0	0	1	1	0	0	c	c.131.1.0	A
d1wnaa_	127	127	20	17	15	5.100	0.625	0.605	0.550	0.510	0.582	0	0	1	1	0	0	d	d.319.1.1	A
d1wnya_	180	180	26	20	16	8.320	0.722	0.607	0.523	0.583	0.577	0	0	1	1	0	0	b	b.51.1.1	A
d1wola_	122	122	24	18	16	6.912	0.706	0.578	0.457	0.715	0.529	0	0	1	0	0	0	a	a.24.16.0	A
d1wpaa1	107	107	46	16	11	8.096	1.704	0.491	0.371	0.518	0.440	0	1	0	0	0	0	h	h.4.17.1	A(416-522)
d1wpba_	168	168	42	18	16	12.096	1.235	0.357	0.333	0.225	0.348	0	1	0	0	0	0	a	a.233.1.1	A
d1wqga_	184	184	41	23	15	14.145	1.079	0.446	0.341	0.575	0.406	0	1	0	0	0	0	d	d.67.3.1	A
d1wrva_	297	297	32	25	19	15.200	0.727	0.499	0.460	0.304	0.487	0	1	0	0	0	0	e	e.17.1.0	A
d1wtja_	332	332	32	27	26	22.464	0.604	0.467	0.368	0.432	0.425	0	1	0	0	0	0	c	c.122.1.0	A
d1wuba_	176	176	36	20	16	11.520	1.000	0.520	0.398	0.304	0.458	0	0	1	0	0	0	b	b.61.6.1	A
d1wvka1	77	77	36	14	12	6.048	1.385	0.311	0.272	0.129	0.291	1	0	0	0	0	0	g	g.82.1.1	A(10-86)
d1wvqa_	163	163	33	23	15	11.385	0.868	0.445	0.364	0.608	0.413	0	1	0	0	0	0	d	d.256.1.0	A
d1wy5a2	95	95	36	16	13	7.488	1.241	0.422	0.360	0.588	0.403	0	1	0	0	0	0	d	d.229.1.1	A(217-311)
d1wy6a_	159	159	35	16	13	7.280	1.207	0.602	0.521	0.561	0.568	0	0	1	1	0	0	a	a.118.20.1	A
d1x0ga_	102	102	24	20	12	5.760	0.750	0.565	0.452	0.493	0.520	0	0	1	0	0	0	b	b.124.1.0	A
d1x2ia1	68	68	20	19	10	3.800	0.690	0.441	0.380	0.421	0.413	0	1	0	0	0	0	a	a.60.2.5	A(2-69)
d1x3la_	436	436	45	33	21	31.185	0.833	0.476	0.367	0.521	0.431	0	1	0	0	0	0	c	c.118.1.0	A
d1x60a_	79	79	26	18	11	5.148	0.897	0.375	0.320	0.538	0.352	0	1	0	0	0	0	d	d.58.52.0	A
d1x6ia1	88	88	25	16	13	5.200	0.862	0.507	0.425	0.403	0.476	0	0	1	0	0	0	a	a.218.1.0	A(1-88)
d1x6za2	116	116	26	18	10	4.680	0.929	0.595	0.523	0.567	0.569	0	0	1	1	0	0	d	d.24.1.1	A(29-144)
d1x91a_	149	149	35	16	14	7.840	1.167	0.612	0.477	0.587	0.557	0	0	1	0	0	0	a	a.29.6.1	A
d1x9ba_	53	53	19	14	8	2.128	0.864	0.643	0.523	0.658	0.583	0	0	1	1	0	0	a	a.10.2.1	A
d1x9da_	452	452	34	28	25	23.800	0.642	0.569	0.492	0.441	0.541	0	0	1	0	0	0	a	a.102.2.1	A
d1x9la1	145	145	41	20	14	11.480	1.206	0.417	0.308	0.598	0.371	0	1	0	0	0	0	b	b.2.10.1	A(1-145)
d1x9na1	264	264	37	23	21	17.871	0.841	0.585	0.413	0.570	0.507	0	0	1	0	0	0	a	a.235.1.1	A(262-533)
d1x9za_	182	182	46	18	15	12.420	1.394	0.526	0.387	0.682	0.467	0	0	1	0	0	0	d	d.292.1.1	A
d1xaka_	68	68	21	15	11	3.465	0.808	0.603	0.485	0.546	0.557	0	0	1	0	0	0	b	b.1.24.1	A
d1xdna_	265	265	33	28	19	17.556	0.702	0.552	0.424	0.664	0.499	0	0	1	0	0	0	d	d.142.2.4	A
d1xeoa_	165	165	25	21	19	9.975	0.625	0.569	0.442	0.456	0.514	0	0	1	0	0	0	d	d.167.1.1	A
d1xg0a_	76	76	34	21	16	11.424	0.919	0.141	0.129	0.016	0.126	1	0	0	0	0	0	d	d.184.1.1	A
d1xkpb1	121	121	26	20	13	6.760	0.788	0.605	0.463	0.578	0.544	0	0	1	0	0	0	d	d.198.1.1	B(2-122)
d1xkra_	205	205	29	22	17	10.846	0.744	0.564	0.482	0.550	0.540	0	0	1	0	0	0	d	d.252.1.1	A
d1xksa_	374	374	37	27	23	22.977	0.740	0.506	0.424	0.278	0.473	0	0	1	0	0	0	b	b.69.14.1	A
d1xlya_	224	224	39	26	17	17.238	0.907	0.565	0.393	0.517	0.489	0	0	1	0	0	0	a	a.232.1.1	A
d1xm3a_	244	244	34	24	19	15.504	0.791	0.544	0.394	0.616	0.474	0	0	1	0	0	0	c	c.1.31.1	A
d1xn8a_	131	131	37	18	16	10.656	1.088	0.480	0.326	0.546	0.408	0	1	0	0	0	0	a	a.229.1.1	A
d1xo8a_	151	151	40	15	15	9.000	1.333	0.604	0.447	0.551	0.535	0	0	1	0	0	0	b	b.1.25.1	A
d1xoua_	72	72	40	15	7	4.200	1.818	0.464	0.389	0.447	0.432	0	1	0	0	0	0	a	a.231.1.1	A
d1xpna1	150	150	34	24	12	9.792	0.944	0.543	0.401	0.590	0.484	0	0	1	0	0	0	b	b.3.7.1	A(21-170)
d1xppa_	99	99	34	21	12	8.568	1.030	0.405	0.299	0.298	0.353	1	0	0	0	0	0	d	d.74.3.2	A
d1xqba_	186	186	36	27	19	18.468	0.783	0.434	0.287	0.580	0.366	1	0	0	0	0	0	e	e.56.1.1	A
d1xrsb2	52	52	20	10	9	1.800	1.053	0.599	0.577	0.588	0.605	0	0	1	1	0	0	d	d.230.4.1	B(33-84)
d1xsva_	106	106	37	14	12	6.216	1.423	0.577	0.452	0.668	0.526	0	0	1	0	0	0	a	a.4.13.3	A
d1xsza1	196	196	35	21	15	11.025	0.972	0.582	0.459	0.599	0.531	0	0	1	0	0	0	a	a.118.3.1	A(2-197)
d1xsza2	156	156	32	21	19	12.768	0.800	0.561	0.361	0.650	0.470	0	0	1	0	0	0	d	d.129.9.1	A(198-353)
d1xtaa2	57	57	23	11	10	2.530	1.095	0.423	0.413	0.557	0.424	0	1	0	0	0	0	g	g.19.1.0	A(165-221)
d1xu1r_	38	38	16	12	8	1.536	0.800	0.630	0.503	0.819	0.581	0	0	1	1	0	0	g	g.24.1.2	R
d1xu6a1	75	75	34	16	13	7.072	1.172	0.369	0.264	0.595	0.327	1	0	0	0	0	0	g	g.16.3.1	A(359-433)
d1xuba1	128	128	30	20	17	10.200	0.811	0.461	0.316	0.563	0.397	0	1	0	0	0	0	d	d.21.1.2	A(1-128)
d1xvsa_	124	124	33	17	14	7.854	1.065	0.535	0.410	0.462	0.481	0	0	1	0	0	0	b	b.1.23.1	A
d1xzpa1	173	173	37	23	14	11.914	1.000	0.589	0.424	0.594	0.517	0	0	1	0	0	0	a	a.24.25.1	A(118-211,372-450)
d1y02a1	44	44	16	13	10	2.080	0.696	0.612	0.497	0.652	0.568	0	0	1	0	0	0	a	a.140.2.1	A(71-114)
d1y0na1	69	69	22	15	12	3.960	0.815	0.586	0.446	0.693	0.526	0	0	1	0	0	0	d	d.291.1.1	A(1-76)
d1y0pa3	146	146	28	19	15	7.980	0.824	0.612	0.463	0.550	0.545	0	0	1	0	0	0	d	d.168.1.1	A(360-505)
d1y0ya1	78	78	18	17	11	3.366	0.643	0.606	0.518	0.497	0.568	0	0	1	1	0	0	b	b.49.3.1	A(73-163)
d1y6xa1	87	87	22	19	15	6.270	0.647	0.504	0.350	0.775	0.441	0	0	1	0	0	0	a	a.204.1.4	A(7-93)
d1y71a1	109	109	29	17	15	7.395	0.906	0.568	0.423	0.669	0.510	0	0	1	0	0	0	b	b.34.16.1	A(4-127)
d1y9ia_	159	159	29	21	14	8.526	0.829	0.601	0.479	0.692	0.556	0	0	1	0	0	0	a	a.195.1.1	A
d1yaro_	218	218	53	20	17	18.020	1.432	0.466	0.332	0.609	0.415	0	1	0	0	0	0	a	a.24.8.1	O
d1yb3a1	166	166	28	21	14	8.232	0.800	0.575	0.506	0.613	0.551	0	0	1	1	0	0	d	d.296.1.2	A(2-167)
d1ydua1	169	169	93	24	17	37.944	2.268	0.151	0.112	0.026	0.129	1	0	0	0	0	1	b	b.162.1.1	A(2-170)
d1yfqa1	341	341	32	28	25	22.400	0.604	0.545	0.422	0.413	0.494	0	0	1	0	0	0	b	b.69.4.2	A(1-341)
d1yfsa1	208	208	33	25	15	12.375	0.825	0.574	0.433	0.560	0.510	0	0	1	0	0	0	a	a.203.1.1	A(237-453)
d1yhnb1	65	65	37	15	8	4.440	1.609	0.311	0.329	0.077	0.321	0	1	0	0	1	0	h	h.1.34.1	B(244-308)
d1yiba1	61	61	42	12	7	3.528	2.211	0.334	0.348	0.174	0.342	0	1	0	0	1	1	a	a.245.1.1	A(190-250)
d1ykha_	95	95	54	17	10	9.180	2.000	0.211	0.229	0.040	0.219	1	0	0	0	1	1	a	a.252.1.2	A
d1ylxa1	100	100	25	16	13	5.200	0.862	0.606	0.498	0.663	0.566	0	0	1	0	0	0	d	d.82.5.1	A(1-100)
d1yoza1	111	111	26	17	11	4.862	0.929	0.594	0.528	0.511	0.571	0	0	1	1	0	0	a	a.253.1.1	A(11-124)
d1yt3a1	101	101	22	17	13	4.862	0.733	0.632	0.518	0.727	0.589	0	0	1	1	0	0	a	a.60.8.3	A(194-294)
d1yu0a1	166	166	49	21	14	14.406	1.400	0.397	0.295	0.368	0.354	1	0	0	0	0	0	b	b.163.1.1	A(5-170)
d1yu5x_	67	67	19	16	12	3.648	0.679	0.586	0.456	0.774	0.532	0	0	1	0	0	0	a	a.14.1.1	X
d1yvra1	346	346	46	31	19	27.094	0.920	0.401	0.348	0.236	0.383	0	1	0	0	0	0	a	a.118.25.1	A(5-363)
d1ywwa_	65	65	16	14	11	2.464	0.640	0.549	0.548	0.643	0.560	0	0	1	1	0	0	a	a.60.11.0	A
d1ywya1	74	74	20	18	11	3.960	0.690	0.593	0.451	0.678	0.532	0	0	1	0	0	0	b	b.55.2.1	A(23-96)
d1z0jb1	51	51	24	13	7	2.184	1.200	0.697	0.530	0.638	0.619	0	0	1	1	0	0	a	a.2.19.1	B(734-784)
d1z0pa1	73	73	31	16	11	5.456	1.148	0.560	0.378	0.763	0.482	0	0	1	0	0	0	a	a.2.18.1	A(1-77)
d1z0sa_	249	249	35	19	19	12.635	0.921	0.541	0.472	0.602	0.517	0	0	1	0	0	0	e	e.52.1.1	A
d1z0wa_	203	203	30	23	17	11.730	0.750	0.603	0.464	0.636	0.549	0	0	1	0	0	0	d	d.14.1.0	A
d1z1aa1	117	117	26	15	13	5.070	0.929	0.607	0.513	0.617	0.561	0	0	1	1	0	0	d	d.339.1.1	A(484-611)
d1z21a1	96	96	25	18	12	5.400	0.833	0.624	0.476	0.611	0.557	0	0	1	0	0	0	a	a.243.1.2	A(42-145)
d1z2ua1	147	147	29	17	14	6.902	0.935	0.615	0.507	0.509	0.564	0	0	1	1	0	0	d	d.20.1.1	A(1-147)
d1z3eb1	67	67	18	13	11	2.574	0.750	0.563	0.553	0.514	0.565	0	0	1	1	0	0	a	a.60.3.1	B(245-311)
d1z3xa2	148	148	23	19	18	7.866	0.622	0.539	0.495	0.410	0.530	0	0	1	0	0	0	a	a.261.1.1	A(88-235)
d1z67a1	127	127	31	20	15	9.300	0.886	0.468	0.339	0.522	0.412	0	1	0	0	0	0	a	a.259.1.1	A(3-131)
d1z8ga2	110	110	28	19	15	7.980	0.824	0.501	0.358	0.649	0.441	0	0	1	0	0	0	d	d.170.1.2	A(50-159)
d1z8ua_	90	90	31	12	12	4.464	1.292	0.617	0.514	0.597	0.576	0	0	1	1	0	0	a	a.7.11.1	A
d1zata2	122	122	37	14	12	6.216	1.423	0.551	0.465	0.551	0.519	0	0	1	0	0	0	d	d.335.1.1	A(217-338)
d1zava1	177	177	54	20	17	18.360	1.459	0.288	0.240	0.322	0.269	1	0	0	0	0	0	d	d.58.62.1	A(1-177)
d1zavu1	30	30	16	13	6	1.248	0.842	0.450	0.438	0.393	0.456	0	1	0	0	0	0	a	a.108.1.1	U(1-30)
d1zbpa1	264	264	38	26	19	18.772	0.844	0.553	0.399	0.599	0.487	0	0	1	0	0	0	e	e.61.1.1	A(2-265)
d1zd0a1	138	138	32	20	17	10.880	0.865	0.521	0.347	0.654	0.446	0	0	1	0	0	0	d	d.329.1.1	A(7-144)
d1zdya_	301	301	27	26	20	14.040	0.587	0.543	0.511	0.218	0.532	0	0	1	1	0	0	d	d.313.1.1	A
d1ze3d1	116	116	38	16	13	7.904	1.310	0.530	0.376	0.594	0.459	0	0	1	0	0	0	b	b.167.1.1	D(1-125)
d1zela2	209	209	30	24	20	14.400	0.682	0.618	0.423	0.579	0.527	0	0	1	0	0	0	d	d.377.1.1	A(83-294)
d1zgka1	288	288	26	24	23	14.352	0.553	0.535	0.487	0.258	0.520	0	0	1	0	0	0	b	b.68.11.1	A(322-609)
d1zhqa1	56	56	22	11	8	1.936	1.158	0.641	0.561	0.741	0.606	0	0	1	1	0	0	d	d.230.7.1	A(1-56)
d1zhxa2	433	433	37	31	26	29.822	0.649	0.545	0.409	0.365	0.486	0	0	1	0	0	0	d	d.338.1.1	A(2-434)
d1zjca1	413	413	35	27	26	24.570	0.660	0.511	0.449	0.243	0.485	0	0	1	0	0	0	e	e.60.1.1	A(3-415)
d1zkea1	79	79	32	16	9	4.608	1.280	0.488	0.416	0.468	0.465	0	1	0	0	0	0	a	a.30.6.1	A(1-79)
d1zl0a1	138	138	24	20	17	8.160	0.649	0.576	0.448	0.663	0.526	0	0	1	0	0	0	c	c.8.10.1	A(170-307)
d1zmec1	36	36	15	11	9	1.485	0.750	0.627	0.484	0.845	0.559	0	0	1	0	0	0	g	g.38.1.1	C(31-66)
d1zn6a1	210	210	28	25	19	13.300	0.636	0.578	0.432	0.573	0.516	0	0	1	0	0	0	d	d.303.1.1	A(2-219)
d1zpsa1	124	124	25	19	16	7.600	0.714	0.414	0.374	0.597	0.406	0	1	0	0	0	0	b	b.168.1.1	A(8-131)
d1zq1a1	74	74	20	15	14	4.200	0.690	0.524	0.409	0.594	0.477	0	0	1	0	0	0	b	b.38.3.1	A(2-75)
d1zroa1	273	273	41	26	21	22.386	0.872	0.534	0.373	0.631	0.467	0	0	1	0	0	0	a	a.264.1.1	A(8-282)
d1zt2b1	207	207	41	20	16	13.120	1.139	0.534	0.420	0.601	0.490	0	0	1	0	0	0	a	a.262.1.1	B(3-209)
d1zt5a_	80	80	23	18	12	4.968	0.767	0.569	0.418	0.704	0.503	0	0	1	0	0	0	g	g.28.1.1	A
d1zyma1	123	123	28	21	15	8.820	0.778	0.538	0.383	0.594	0.469	0	0	1	0	0	0	a	a.60.10.1	A(22-144)
d1zzka2	79	79	23	14	13	4.186	0.852	0.563	0.452	0.583	0.519	0	0	1	0	0	0	d	d.51.1.0	A(11-89)
d2a1va1	131	131	23	21	15	7.245	0.639	0.593	0.466	0.627	0.543	0	0	1	0	0	0	d	d.198.3.1	A(4-134)
d2a26a1	47	47	22	11	8	1.936	1.158	0.645	0.539	0.464	0.603	0	0	1	1	0	0	a	a.2.16.1	A(1-47)
d2a2la1	142	142	30	25	14	10.500	0.769	0.535	0.362	0.679	0.460	0	0	1	0	0	0	d	d.110.9.1	A(4-145)
d2a73a6	66	66	39	13	10	5.070	1.696	0.362	0.283	0.319	0.328	1	0	0	0	0	0	g	g.94.1.1	A(578-643)
d2a73b6	113	113	30	17	17	8.670	0.882	0.575	0.378	0.585	0.482	0	0	1	0	0	0	b	b.23.4.1	B(912-962,1269-1330)
d2a90a1	80	80	20	16	14	4.480	0.667	0.565	0.427	0.675	0.511	0	0	1	0	0	0	d	d.289.1.1	A(43-131)
d2a9da2	246	246	29	27	20	15.660	0.617	0.564	0.414	0.422	0.494	0	0	1	0	0	0	d	d.176.1.1	A(95-343)
d2a9sa1	167	167	25	21	17	8.925	0.658	0.609	0.482	0.562	0.561	0	0	1	0	0	0	c	c.51.5.1	A(1-167)
d2a9ua1	134	134	49	28	16	21.952	1.114	0.162	0.160	0.031	0.164	1	0	0	0	0	0	a	a.118.23.1	A(6-139)
d2absa1	340	340	32	26	22	18.304	0.667	0.520	0.456	0.447	0.499	0	0	1	0	0	0	c	c.72.1.1	A(10-359)
d2ad6b_	69	69	42	17	9	6.426	1.615	0.143	0.191	0.004	0.164	1	0	0	0	1	0	a	a.137.2.1	B
d2aefa2	89	89	24	16	13	4.992	0.828	0.489	0.398	0.683	0.454	0	1	0	0	0	0	d	d.286.1.1	A(245-336)
d2aexa_	336	336	38	28	22	23.408	0.760	0.572	0.420	0.649	0.505	0	0	1	0	0	0	d	d.248.1.0	A
d2ag4a2	162	162	26	21	16	8.736	0.703	0.266	0.385	0.039	0.334	1	0	0	0	1	0	b	b.95.1.1	A(3-164)
d2agyd_	109	109	23	19	12	5.244	0.742	0.648	0.510	0.681	0.591	0	0	1	1	0	0	g	g.21.1.0	D
d2ahma1	73	73	21	17	10	3.570	0.778	0.470	0.430	0.575	0.459	0	1	0	0	0	0	a	a.8.9.1	A(6-78)
d2aiba_	98	98	20	15	12	3.600	0.741	0.437	0.512	0.060	0.472	0	1	0	0	1	0	a	a.134.1.1	A
d2aj7a1	148	148	33	22	15	10.890	0.892	0.571	0.383	0.642	0.483	0	0	1	0	0	0	b	b.158.1.1	A(1-148)
d2ajaa1	342	342	50	27	23	31.050	1.000	0.451	0.309	0.617	0.389	0	1	0	0	0	0	a	a.118.24.1	A(3-348)
d2ap3a1	181	181	45	16	14	10.080	1.500	0.489	0.443	0.541	0.476	0	1	0	0	0	0	a	a.24.27.1	A(12-196)
d2apla1	149	149	37	17	15	9.435	1.156	0.535	0.416	0.639	0.491	0	0	1	0	0	0	a	a.258.1.1	A(2-150)
d2apob_	55	55	25	20	8	4.000	0.893	0.254	0.265	0.052	0.258	1	0	0	0	1	0	g	g.41.16.1	B
d2arca_	161	161	25	20	18	9.000	0.658	0.613	0.495	0.655	0.569	0	0	1	0	0	0	b	b.82.4.1	A
d2asba2	79	79	19	17	12	3.876	0.655	0.629	0.498	0.559	0.574	0	0	1	0	0	0	d	d.52.3.1	A(184-262)
d2aska_	101	101	33	18	12	7.128	1.100	0.307	0.305	0.070	0.305	0	1	0	0	0	0	g	g.17.1.0	A
d2au5a1	128	128	28	24	16	10.752	0.700	0.569	0.357	0.587	0.469	0	0	1	0	0	0	a	a.244.1.1	A(1-132)
d2au7a_	175	175	24	21	17	8.568	0.632	0.563	0.491	0.645	0.537	0	0	1	0	0	0	b	b.40.5.1	A
d2auwa2	84	84	21	16	13	4.368	0.724	0.629	0.493	0.516	0.568	0	0	1	0	0	0	d	d.331.1.1	A(4-87)
d2avue1	156	156	30	21	17	10.710	0.789	0.583	0.400	0.513	0.498	0	0	1	0	0	0	e	e.64.1.1	E(5-160)
d2axwa1	121	121	30	17	14	7.140	0.968	0.576	0.413	0.632	0.501	0	0	1	0	0	0	b	b.2.3.2	A(1-121)
d2ayda_	76	76	21	14	11	3.234	0.840	0.582	0.492	0.574	0.544	0	0	1	0	0	0	g	g.79.1.0	A
d2az0a1	70	70	36	13	8	3.744	1.714	0.616	0.472	0.407	0.555	0	0	1	0	0	0	a	a.30.8.1	A(2-71)
d2azea1	148	148	45	29	18	23.490	0.957	0.233	0.171	0.279	0.207	1	0	0	0	0	0	e	e.63.1.1	A(199-346)
d2b0aa1	185	185	32	21	19	12.768	0.800	0.464	0.372	0.482	0.427	0	1	0	0	0	0	c	c.8.8.1	A(1-185)
d2b1ea_	532	532	100	26	21	54.600	2.128	0.492	0.308	0.561	0.409	0	1	0	0	0	1	a	a.118.17.2	A
d2b1ya1	101	101	40	27	16	17.280	0.930	0.181	0.139	0.275	0.170	1	0	0	0	0	0	b	b.156.1.1	A(4-104)
d2b2ha_	391	391	35	27	25	23.625	0.673	0.608	0.452	0.568	0.545	0	0	1	0	0	0	f	f.44.1.0	A
d2b3wa1	160	160	26	19	18	8.892	0.703	0.556	0.471	0.416	0.523	0	0	1	0	0	0	d	d.336.1.1	A(1-160)
d2b3ya1	259	259	32	28	17	15.232	0.711	0.554	0.446	0.665	0.513	0	0	1	0	0	0	c	c.8.2.1	A(631-889)
d2b3ya2	629	629	51	32	28	45.696	0.850	0.548	0.398	0.573	0.488	0	0	1	0	0	0	c	c.83.1.1	A(2-630)
d2b5la3	97	97	29	17	16	7.888	0.879	0.500	0.340	0.615	0.427	0	0	1	0	0	0	a	a.297.1.1	A(1044-1140)
d2b5lc_	174	174	33	19	18	11.286	0.892	0.526	0.389	0.647	0.472	0	0	1	0	0	0	d	d.384.1.1	C
d2b7cb_	90	90	26	13	11	3.718	1.083	0.602	0.545	0.416	0.580	0	0	1	1	0	0	d	d.58.12.1	B
d2b97a_	70	70	15	14	11	2.310	0.600	0.676	0.572	0.724	0.632	0	0	1	1	0	0	b	b.138.1.1	A
d2b9da1	50	50	19	12	8	1.824	0.950	0.520	0.486	0.500	0.513	0	0	1	0	0	0	g	g.91.1.1	A(44-93)
d2ba2a1	81	81	78	13	8	8.112	3.714	0.171	0.207	0.011	0.190	1	0	0	0	1	1	h	h.1.30.1	A(5-85)
d2baia1	32	32	22	8	8	1.408	1.375	0.599	0.464	0.887	0.548	0	0	1	0	0	0	g	g.87.1.1	A(1-32)
d2basa1	257	257	33	25	20	16.500	0.733	0.521	0.426	0.494	0.481	0	0	1	0	0	0	c	c.1.33.1	A(2-262)
d2baya_	56	56	18	12	11	2.376	0.783	0.633	0.536	0.578	0.599	0	0	1	1	0	0	g	g.44.1.2	A
d2bbha1	223	223	39	31	22	26.598	0.736	0.448	0.279	0.549	0.374	1	0	0	0	0	0	d	d.328.1.1	A(13-244)
d2bjqa1	170	170	28	21	17	9.996	0.737	0.612	0.455	0.614	0.544	0	0	1	0	0	0	b	b.169.1.1	A(175-344)
d2bkya_	89	89	28	13	12	4.368	1.120	0.475	0.407	0.536	0.447	0	1	0	0	0	0	d	d.68.6.1	A
d2bl8a1	93	93	21	19	12	4.788	0.677	0.523	0.462	0.435	0.506	0	0	1	0	0	0	a	a.29.8.2	A(4-103)
d2blna1	101	101	21	15	13	4.095	0.750	0.607	0.536	0.463	0.584	0	0	1	1	0	0	b	b.46.1.1	A(204-304)
d2blna2	197	197	28	21	19	11.172	0.700	0.567	0.472	0.487	0.531	0	0	1	0	0	0	c	c.65.1.1	A(1-203)
d2bnka_	64	64	30	14	11	4.620	1.200	0.455	0.337	0.496	0.402	0	1	0	0	0	0	a	a.251.1.1	A
d2bogx_	280	280	32	21	20	13.440	0.780	0.567	0.489	0.629	0.541	0	0	1	0	0	0	c	c.6.1.1	X
d2brfa1	100	100	22	16	12	4.224	0.786	0.605	0.539	0.449	0.580	0	0	1	1	0	0	b	b.26.1.2	A(8-108)
d2bs2a1	198	198	43	26	18	20.124	0.977	0.118	0.206	0.001	0.163	1	0	0	0	1	0	a	a.7.3.1	A(458-655)
d2bs2b1	134	134	27	22	16	9.504	0.711	0.515	0.373	0.721	0.453	0	0	1	0	0	0	a	a.1.2.1	B(107-240)
d2bs2c_	255	255	43	30	25	32.250	0.782	0.391	0.244	0.507	0.328	1	0	0	0	0	0	f	f.21.2.1	C
d2btia_	59	59	23	17	15	5.865	0.719	0.238	0.220	0.055	0.229	1	0	0	0	0	0	b	b.151.1.1	A
d2btva_	845	845	83	52	24	103.584	1.092	0.408	0.268	0.543	0.352	1	0	0	0	0	0	e	e.28.1.1	A
d2bvca1	101	101	25	16	13	5.200	0.862	0.607	0.476	0.645	0.554	0	0	1	0	0	0	d	d.15.9.0	A(4-104)
d2bw3a1	84	84	25	21	17	8.925	0.658	0.216	0.190	0.485	0.215	1	0	0	0	0	0	a	a.270.1.1	A(79-162)
d2bz1a_	174	174	28	19	17	9.044	0.778	0.554	0.457	0.644	0.513	0	0	1	0	0	0	c	c.144.1.1	A
d2bzva1	147	147	24	19	14	6.384	0.727	0.593	0.517	0.558	0.564	0	0	1	1	0	0	b	b.21.1.0	A(229-387)
d2c0ga1	106	106	23	21	12	5.796	0.697	0.615	0.468	0.664	0.551	0	0	1	0	0	0	a	a.71.1.0	A(1146-1251)
d2c0sa1	57	57	27	11	9	2.673	1.350	0.610	0.496	0.648	0.561	0	0	1	0	0	0	a	a.30.7.1	A(1-57)
d2c1ia2	187	187	41	20	15	12.300	1.171	0.551	0.415	0.621	0.492	0	0	1	0	0	0	d	d.341.1.1	A(46-267)
d2c2ua_	178	178	36	20	13	9.360	1.091	0.597	0.481	0.693	0.549	0	0	1	0	0	0	a	a.25.1.0	A
d2c42a4	253	253	35	27	25	23.625	0.673	0.474	0.306	0.579	0.397	0	1	0	0	0	0	c	c.64.1.1	A(416-668)
d2c60a1	80	80	18	16	12	3.456	0.643	0.608	0.517	0.547	0.560	0	0	1	1	0	0	d	d.15.2.2	A(43-122)
d2c61a2	107	107	27	21	16	9.072	0.730	0.529	0.350	0.607	0.446	0	0	1	0	0	0	a	a.69.1.0	A(351-457)
d2c6qa1	327	327	35	28	23	22.540	0.686	0.543	0.390	0.565	0.473	0	0	1	0	0	0	c	c.1.5.0	A(10-336)
d2c9wa1	50	50	24	15	8	2.880	1.043	0.471	0.381	0.540	0.443	0	1	0	0	0	0	a	a.271.1.1	A(149-198)
d2ca5a1	59	59	33	15	7	3.465	1.500	0.502	0.374	0.532	0.448	0	0	1	0	0	0	a	a.2.20.1	A(20-78)
d2cara1	194	194	33	19	17	10.659	0.917	0.549	0.457	0.676	0.522	0	0	1	0	0	0	c	c.51.4.1	A(1-194)
d2cb8a_	86	86	23	17	11	4.301	0.821	0.577	0.489	0.794	0.545	0	0	1	0	0	0	a	a.11.1.1	A
d2cboa_	115	115	26	19	13	6.422	0.812	0.552	0.422	0.643	0.496	0	0	1	0	0	0	b	b.1.7.1	A
d2cc6a_	64	64	25	10	9	2.250	1.316	0.633	0.536	0.700	0.585	0	0	1	1	0	0	d	d.230.2.1	A
d2ccqa1	99	99	22	16	13	4.576	0.759	0.634	0.534	0.624	0.594	0	0	1	1	0	0	d	d.314.1.1	A(11-109)
d2ccva1	99	99	28	16	11	4.928	1.037	0.628	0.495	0.666	0.572	0	0	1	0	0	0	b	b.154.1.1	A(1-99)
d2cg7a1	43	43	19	10	9	1.710	1.000	0.657	0.525	0.633	0.588	0	0	1	1	0	0	g	g.27.1.1	A(109-151)
d2chha_	113	113	23	17	14	5.474	0.742	0.580	0.461	0.512	0.529	0	0	1	0	0	0	b	b.115.1.1	A
d2choa1	154	154	34	19	17	10.982	0.944	0.536	0.385	0.569	0.468	0	0	1	0	0	0	a	a.246.1.1	A(437-590)
d2ci1a_	275	275	26	24	22	13.728	0.565	0.563	0.500	0.467	0.540	0	0	1	1	0	0	d	d.126.1.0	A
d2ciwa1	120	120	31	19	14	8.246	0.939	0.482	0.353	0.625	0.429	0	1	0	0	0	0	a	a.39.3.1	A(0-119)
d2ckaa1	58	58	26	13	11	3.718	1.083	0.579	0.402	0.552	0.496	0	0	1	0	0	0	d	d.76.2.1	A(2028-2085)
d2clya1	105	105	94	19	6	10.716	3.760	0.075	0.178	0.000	0.133	1	0	0	0	1	1	f	f.52.1.1	A(79-183)
d2clyb1	120	120	60	16	14	13.440	2.000	0.166	0.197	0.022	0.181	1	0	0	0	1	1	f	f.53.1.1	B(4-123)
d2clyc_	66	66	50	21	13	13.650	1.471	0.109	0.113	0.148	0.117	1	0	0	0	1	0	f	f.45.1.1	C
d2cmyb1	21	21	11	9	6	0.594	0.733	0.574	0.562	0.685	0.584	0	0	1	1	0	0	g	g.2.4.1	B(7-29)
d2cnqa_	301	301	31	26	21	16.926	0.660	0.561	0.469	0.550	0.526	0	0	1	0	0	0	d	d.143.1.1	A
d2cona1	66	66	41	20	12	9.840	1.281	0.217	0.160	0.083	0.187	1	0	0	0	0	0	g	g.41.15.1	A(8-73)
d2cr9a1	126	126	34	21	15	10.710	0.944	0.536	0.346	0.597	0.455	0	0	1	0	0	0	d	d.297.1.1	A(8-133)
d2crua1	105	105	33	19	14	8.778	1.000	0.335	0.282	0.321	0.315	1	0	0	0	0	0	a	a.5.6.1	A(8-112)
d2cs7a1	55	55	18	15	10	2.700	0.720	0.630	0.493	0.396	0.573	0	0	1	0	0	0	d	d.9.2.1	A(0-54)
d2csba5	291	291	32	26	22	18.304	0.667	0.579	0.450	0.584	0.526	0	0	1	0	0	0	a	a.267.1.1	A(3-293)
d2cu2a1	67	67	23	15	12	4.140	0.852	0.499	0.379	0.649	0.451	0	1	0	0	0	0	b	b.81.4.1	A(269-335)
d2cvea2	67	67	21	14	11	3.234	0.840	0.622	0.511	0.606	0.573	0	0	1	1	0	0	d	d.58.11.2	A(125-191)
d2cwya1	94	94	20	14	13	3.640	0.741	0.599	0.567	0.702	0.597	0	0	1	1	0	0	a	a.246.2.1	A(1-94)
d2cx1a2	90	90	23	16	15	5.520	0.742	0.522	0.417	0.643	0.478	0	0	1	0	0	0	d	d.17.6.4	A(1-90)
d2cxya_	114	114	26	19	17	8.398	0.722	0.551	0.385	0.692	0.482	0	0	1	0	0	0	a	a.4.3.1	A
d2cyja1	118	118	20	18	13	4.680	0.645	0.593	0.567	0.687	0.586	0	0	1	1	0	0	c	c.103.1.1	A(1-118)
d2cz9a2	168	168	30	25	19	14.250	0.682	0.327	0.290	0.187	0.310	1	0	0	0	0	0	d	d.58.26.0	A(179-350)
d2czra1	218	218	38	28	16	17.024	0.864	0.490	0.357	0.634	0.437	0	1	0	0	0	0	c	c.52.4.1	A(1-218)
d2czvc1	118	118	27	19	15	7.695	0.794	0.408	0.362	0.592	0.398	0	1	0	0	0	0	d	d.58.59.1	C(3-120)
d2d00a1	104	104	43	17	13	9.503	1.433	0.292	0.249	0.396	0.283	1	0	0	0	0	0	c	c.149.1.1	A(6-109)
d2d0oa1	162	162	24	20	16	7.680	0.667	0.624	0.498	0.569	0.569	0	0	1	0	0	0	c	c.8.6.1	A(93-254)
d2d1sa_	539	539	42	30	29	36.540	0.712	0.499	0.410	0.525	0.467	0	1	0	0	0	0	e	e.23.1.1	A
d2d28c1	144	144	26	21	17	9.282	0.684	0.549	0.405	0.694	0.486	0	0	1	0	0	0	d	d.52.10.1	C(1-149)
d2d74b1	101	101	27	19	13	6.669	0.844	0.403	0.367	0.459	0.393	0	1	0	0	0	0	d	d.241.1.0	B(3-103)
d2d74b2	36	36	17	10	7	1.190	1.000	0.658	0.555	0.752	0.612	0	0	1	1	0	0	g	g.59.1.0	B(104-139)
d2d7cc1	42	42	34	14	6	2.856	1.700	0.263	0.293	0.050	0.281	1	0	0	0	1	0	h	h.1.31.1	C(715-756)
d2d8da1	80	80	32	16	10	5.120	1.231	0.347	0.347	0.298	0.355	0	1	0	0	1	0	a	a.130.1.1	A(3-82)
d2d9ba1	96	96	26	20	15	7.800	0.743	0.403	0.313	0.375	0.372	0	1	0	0	0	0	d	d.288.1.0	A(8-103)
d2d9ra1	85	85	20	15	11	3.300	0.769	0.588	0.525	0.632	0.565	0	0	1	1	0	0	b	b.129.2.1	A(20-104)
d2db7a1	55	55	34	13	7	3.094	1.700	0.488	0.403	0.608	0.460	0	1	0	0	0	0	a	a.273.1.1	A(3-57)
d2dbsa1	80	80	23	17	10	3.910	0.852	0.549	0.457	0.707	0.516	0	0	1	0	0	0	d	d.374.1.1	A(7-86)
d2diia1	48	48	20	15	11	3.300	0.769	0.446	0.352	0.437	0.407	0	1	0	0	0	0	a	a.240.1.1	A(8-55)
d2dk4a1	63	63	21	19	10	3.990	0.724	0.541	0.403	0.725	0.484	0	0	1	0	0	0	a	a.140.6.1	A(8-70)
d2dkja_	402	402	35	32	22	24.640	0.648	0.456	0.403	0.457	0.436	0	1	0	0	0	0	c	c.67.1.4	A
d2dlba1	70	70	31	16	10	4.960	1.192	0.290	0.281	0.183	0.289	1	0	0	0	0	0	b	b.174.1.1	A(2002-2071)
d2dm9a1	118	118	30	19	15	8.550	0.882	0.450	0.359	0.545	0.414	0	1	0	0	0	0	d	d.81.4.1	A(81-198)
d2dpla2	119	119	28	17	14	6.664	0.903	0.630	0.456	0.579	0.547	0	0	1	0	0	0	d	d.52.2.0	A(190-308)
d2dsma1	64	64	37	19	15	10.545	1.088	0.222	0.167	0.171	0.202	1	0	0	0	0	0	d	d.372.1.1	A(1-64)
d2dsya1	80	80	25	15	11	4.125	0.962	0.622	0.465	0.608	0.550	0	0	1	0	0	0	d	d.304.1.2	A(3-82)
d2dt6a1	63	63	18	14	11	2.772	0.720	0.650	0.527	0.641	0.597	0	0	1	1	0	0	a	a.217.1.1	A(48-110)
d2dwka_	162	162	34	21	15	10.710	0.944	0.519	0.413	0.690	0.484	0	0	1	0	0	0	a	a.256.1.1	A
d2dxua2	43	43	16	14	10	2.240	0.667	0.601	0.480	0.402	0.552	0	0	1	0	0	0	b	b.34.1.1	A(189-235)
d2e0aa1	165	165	31	20	17	10.540	0.838	0.575	0.441	0.488	0.518	0	0	1	0	0	0	a	a.29.5.0	A(20-187)
d2e3ha1	71	71	17	15	11	2.805	0.654	0.619	0.555	0.607	0.602	0	0	1	1	0	0	b	b.34.10.1	A(212-282)
d2e5fa_	325	325	31	24	23	17.112	0.660	0.560	0.473	0.598	0.525	0	0	1	0	0	0	c	c.80.1.0	A
d2e7sa1	114	114	110	11	7	8.470	6.111	0.278	0.288	0.128	0.289	1	0	0	0	1	1	h	h.1.33.1	A(31-144)
d2ebfx1	300	300	40	35	18	25.200	0.755	0.441	0.332	0.636	0.399	0	1	0	0	0	0	a	a.296.1.1	X(575-874)
d2ebfx2	219	219	33	24	20	15.840	0.750	0.571	0.403	0.530	0.502	0	0	1	0	0	0	c	c.150.1.2	X(875-1093)
d2ecsa_	60	60	21	16	11	3.696	0.778	0.518	0.392	0.463	0.463	0	0	1	0	0	0	a	a.35.1.2	A
d2ed6a1	170	170	39	24	16	14.976	0.975	0.543	0.336	0.453	0.445	0	0	1	0	0	0	b	b.170.1.1	A(32-201)
d2egha1	97	97	31	21	13	8.463	0.912	0.331	0.273	0.188	0.304	1	0	0	0	0	0	a	a.69.3.1	A(301-397)
d2enda_	137	137	27	19	15	7.695	0.794	0.577	0.451	0.561	0.520	0	0	1	0	0	0	a	a.18.1.1	A
d2eq9c_	40	40	14	11	8	1.232	0.737	0.631	0.574	0.650	0.612	0	0	1	1	0	0	a	a.9.1.0	C
d2es4d1	270	270	44	36	29	45.936	0.677	0.062	0.124	0.000	0.097	1	0	0	0	1	0	a	a.137.15.1	D(53-332)
d2es9a1	97	97	18	17	13	3.978	0.600	0.593	0.526	0.500	0.568	0	0	1	1	0	0	a	a.247.1.1	A(11-107)
d2etda1	139	139	36	15	11	5.940	1.385	0.590	0.507	0.627	0.556	0	0	1	1	0	0	a	a.29.9.1	A(35-183)
d2euca1	108	108	21	16	14	4.704	0.700	0.599	0.527	0.730	0.574	0	0	1	1	0	0	a	a.249.1.1	A(1-113)
d2ew0a1	175	175	30	20	17	10.200	0.811	0.598	0.454	0.589	0.534	0	0	1	0	0	0	d	d.310.1.1	A(5-179)
d2ewka_	107	107	24	18	15	6.480	0.727	0.427	0.385	0.304	0.412	0	1	0	0	0	0	a	a.138.1.1	A
d2ex3b1	162	162	42	31	16	20.832	0.894	0.347	0.242	0.115	0.294	1	0	0	0	0	0	a	a.263.1.1	B(71-259)
d2exda1	72	72	28	18	10	5.040	1.000	0.410	0.320	0.469	0.378	0	1	0	0	0	0	b	b.40.12.1	A(72-143)
d2exna1	120	120	27	18	17	8.262	0.771	0.552	0.394	0.705	0.488	0	0	1	0	0	0	b	b.165.1.1	A(1-120)
d2eyqa1	80	80	23	18	11	4.554	0.793	0.554	0.411	0.564	0.487	0	0	1	0	0	0	b	b.34.18.1	A(466-545)
d2eyqa6	158	158	30	30	13	11.700	0.698	0.477	0.349	0.614	0.423	0	1	0	0	0	0	d	d.315.1.1	A(990-1147)
d2f01a_	121	121	30	18	15	8.100	0.909	0.565	0.383	0.659	0.485	0	0	1	0	0	0	b	b.61.1.1	A
d2f09a1	82	82	20	16	13	4.160	0.690	0.632	0.489	0.568	0.566	0	0	1	0	0	0	b	b.61.8.1	A(1-82)
d2f22a1	141	141	26	18	18	8.424	0.722	0.577	0.448	0.526	0.527	0	0	1	0	0	0	a	a.213.1.2	A(1-141)
d2f23a1	75	75	41	12	8	3.936	2.050	0.630	0.469	0.673	0.555	0	0	1	0	0	1	a	a.2.1.1	A(3-77)
d2f2ba_	245	245	32	22	17	11.968	0.821	0.585	0.482	0.403	0.541	0	0	1	0	0	0	f	f.19.1.0	A
d2f4ia1	176	176	27	23	16	9.936	0.692	0.582	0.470	0.577	0.540	0	0	1	0	0	0	b	b.40.11.1	A(39-214)
d2f4mb2	60	60	14	14	12	2.352	0.538	0.558	0.522	0.476	0.542	0	0	1	1	0	0	a	a.189.1.1	B(273-332)
d2f5ga_	130	130	38	15	13	7.410	1.357	0.574	0.468	0.521	0.538	0	0	1	0	0	0	d	d.58.57.1	A
d2f5tx1	92	92	22	19	12	5.016	0.710	0.635	0.476	0.535	0.565	0	0	1	0	0	0	b	b.38.5.1	X(247-338)
d2f69a1	78	78	21	16	14	4.704	0.700	0.583	0.417	0.646	0.510	0	0	1	0	0	0	b	b.76.2.1	A(116-193)
d2f69a2	166	166	24	21	16	8.064	0.649	0.549	0.475	0.472	0.516	0	0	1	0	0	0	b	b.85.7.1	A(194-364)
d2f6ma2	64	64	32	13	11	4.576	1.333	0.541	0.371	0.561	0.462	0	0	1	0	0	0	a	a.2.17.1	A(322-385)
d2f9ha1	121	121	20	18	16	5.760	0.588	0.577	0.497	0.507	0.545	0	0	1	0	0	0	b	b.161.1.1	A(3-123)
d2fb5a1	201	201	38	27	19	19.494	0.826	0.399	0.294	0.514	0.357	1	0	0	0	0	0	d	d.320.1.1	A(5-205)
d2fcja1	114	114	21	19	13	5.187	0.656	0.584	0.501	0.612	0.555	0	0	1	1	0	0	c	c.136.1.1	A(1-114)
d2fcla1	156	156	25	22	16	8.800	0.658	0.560	0.466	0.570	0.519	0	0	1	0	0	0	d	d.218.1.11	A(2-157)
d2fcoa_	154	154	27	22	18	10.692	0.675	0.534	0.402	0.638	0.482	0	0	1	0	0	0	c	c.52.1.28	A
d2fcwa1	105	105	42	14	12	7.056	1.615	0.589	0.406	0.707	0.506	0	0	1	0	0	0	a	a.13.1.1	A(216-320)
d2fcwb1	39	39	16	11	9	1.584	0.800	0.611	0.481	0.617	0.556	0	0	1	0	0	0	g	g.12.1.1	B(86-124)
d2fdoa1	92	92	30	19	14	7.980	0.909	0.250	0.245	0.215	0.247	1	0	0	0	0	0	d	d.337.1.1	A(1-92)
d2fefa1	124	124	33	14	14	6.468	1.179	0.613	0.481	0.531	0.556	0	0	1	0	0	0	a	a.29.11.1	A(6-129)
d2fefa2	157	157	28	22	16	9.856	0.737	0.599	0.432	0.512	0.526	0	0	1	0	0	0	a	a.254.1.1	A(135-293)
d2ffga1	78	78	21	17	12	4.284	0.724	0.621	0.466	0.646	0.546	0	0	1	0	0	0	d	d.317.1.1	A(2-79)
d2ffma_	83	83	19	16	13	3.952	0.655	0.598	0.496	0.463	0.561	0	0	1	0	0	0	d	d.267.1.1	A
d2ffta1	83	83	60	27	16	25.920	1.395	0.024	0.052	0.000	0.038	1	0	0	0	1	0	g	g.88.1.1	A(2-84)
d2fgga1	84	84	40	20	11	8.800	1.290	0.323	0.234	0.402	0.285	1	0	0	0	0	0	d	d.50.5.1	A(4-87)
d2fgra_	332	332	34	28	21	19.992	0.694	0.396	0.377	0.325	0.397	0	1	0	0	0	0	f	f.4.3.1	A
d2fhza1	83	83	25	13	13	4.225	0.962	0.628	0.509	0.480	0.580	0	0	1	1	0	0	d	d.311.1.1	A(27-109)
d2fhzb_	93	93	22	16	13	4.576	0.759	0.535	0.456	0.718	0.512	0	0	1	0	0	0	d	d.243.1.2	B
d2fi0a1	79	79	22	13	12	3.432	0.880	0.556	0.500	0.495	0.539	0	0	1	1	0	0	a	a.248.1.1	A(3-81)
d2fiya1	285	285	29	27	18	14.094	0.644	0.588	0.489	0.638	0.548	0	0	1	0	0	0	e	e.59.1.1	A(19-308)
d2fj8a1	59	59	19	13	13	3.211	0.731	0.562	0.426	0.667	0.501	0	0	1	0	0	0	g	g.3.13.1	A(65-123)
d2fk4a1	65	65	21	14	13	3.822	0.778	0.508	0.409	0.549	0.474	0	0	1	0	0	0	g	g.90.1.1	A(3-67)
d2fm9a1	201	201	32	23	18	13.248	0.780	0.539	0.397	0.625	0.476	0	0	1	0	0	0	a	a.257.1.1	A(49-263)
d2fmaa1	57	57	22	11	9	2.178	1.100	0.660	0.581	0.710	0.639	0	0	1	1	0	0	d	d.230.3.1	A(133-189)
d2fmpa1	82	82	20	15	11	3.300	0.769	0.588	0.513	0.585	0.561	0	0	1	1	0	0	a	a.60.6.1	A(10-91)
d2fmpa2	57	57	17	14	11	2.618	0.680	0.605	0.515	0.434	0.564	0	0	1	1	0	0	a	a.60.12.1	A(92-148)
d2fn3a1	160	160	25	20	16	8.000	0.694	0.588	0.487	0.667	0.550	0	0	1	0	0	0	c	c.31.1.3	A(182-341)
d2fn3a2	180	180	24	21	18	9.072	0.615	0.597	0.505	0.574	0.567	0	0	1	1	0	0	c	c.36.1.0	A(2-181)
d2fo1d1	63	63	59	17	7	7.021	2.458	0.113	0.174	0.001	0.146	1	0	0	0	1	1	a	a.137.14.1	D(52-114)
d2fpna1	205	205	58	23	18	24.012	1.415	0.317	0.248	0.498	0.293	1	0	0	0	0	0	d	d.129.10.1	A(1-214)
d2fqma1	65	65	26	23	11	6.578	0.765	0.304	0.245	0.308	0.281	1	0	0	0	0	0	d	d.378.1.1	A(107-171)
d2fsya1	280	280	64	35	17	38.080	1.231	0.372	0.220	0.467	0.305	1	0	0	0	0	0	d	d.183.1.1	A(104-383)
d2ftxa1	89	89	22	17	14	5.236	0.710	0.514	0.406	0.650	0.468	0	0	1	0	0	0	d	d.300.1.1	A(133-221)
d2fupa1	128	128	34	13	12	5.304	1.360	0.542	0.522	0.415	0.542	0	0	1	1	0	0	a	a.47.5.1	A(1-130)
d2fvya_	305	305	37	21	20	15.540	0.902	0.601	0.487	0.421	0.551	0	0	1	0	0	0	c	c.93.1.1	A
d2fyuk_	53	53	39	12	9	4.212	1.857	0.206	0.247	0.100	0.232	1	0	0	0	1	0	f	f.23.15.1	K
d2fzpa1	125	125	24	17	16	6.528	0.727	0.608	0.502	0.570	0.567	0	0	1	1	0	0	d	d.345.1.1	A(193-317)
d2fzta1	78	78	38	12	10	4.560	1.727	0.468	0.407	0.415	0.448	0	1	0	0	0	0	a	a.46.3.1	A(1-78)
d2g0da_	404	404	33	28	24	22.176	0.635	0.595	0.487	0.568	0.551	0	0	1	0	0	0	a	a.102.6.1	A
d2g5fa1	435	435	33	31	25	25.575	0.589	0.549	0.438	0.539	0.507	0	0	1	0	0	0	d	d.161.1.1	A(15-449)
d2g6fx1	54	54	16	14	10	2.240	0.667	0.651	0.545	0.688	0.606	0	0	1	1	0	0	b	b.34.2.1	X(10-63)
d2g6ta1	305	305	41	27	23	25.461	0.820	0.423	0.333	0.636	0.387	0	1	0	0	0	0	c	c.147.1.1	A(1-305)
d2g77a1	197	197	35	22	19	14.630	0.854	0.557	0.394	0.612	0.486	0	0	1	0	0	0	a	a.69.2.1	A(246-442)
d2g7oa1	68	68	32	24	8	6.144	1.000	0.285	0.247	0.036	0.266	1	0	0	0	0	0	a	a.241.1.1	A(60-127)
d2gb5a2	29	29	12	10	9	1.080	0.632	0.627	0.536	0.784	0.593	0	0	1	1	0	0	g	g.41.14.1	A(97-125)
d2gboa1	82	82	59	12	7	4.956	3.105	0.329	0.343	0.255	0.341	0	1	0	0	1	1	a	a.23.6.1	A(1-82)
d2geca1	138	138	29	23	17	11.339	0.725	0.376	0.304	0.332	0.350	0	1	0	0	0	0	b	b.148.1.1	A(23-160)
d2gf4a1	89	89	39	16	13	8.112	1.345	0.430	0.305	0.728	0.384	0	1	0	0	0	0	a	a.8.10.1	A(1-89)
d2gfqa1	286	286	32	25	19	15.200	0.727	0.617	0.501	0.654	0.569	0	0	1	1	0	0	c	c.56.7.1	A(-11-274)
d2ggca_	263	263	30	24	21	15.120	0.667	0.605	0.474	0.680	0.552	0	0	1	0	0	0	d	d.127.1.1	A
d2gk6a2	84	84	22	19	15	6.270	0.647	0.617	0.408	0.586	0.518	0	0	1	0	0	0	b	b.49.4.1	A(325-415)
d2gkga_	122	122	22	17	15	5.610	0.688	0.616	0.497	0.585	0.561	0	0	1	0	0	0	c	c.23.1.0	A
d2gkpa1	164	164	24	23	17	9.384	0.600	0.526	0.453	0.523	0.507	0	0	1	0	0	0	d	d.351.1.1	A(1-164)
d2glza1	149	149	28	23	17	10.948	0.700	0.574	0.393	0.645	0.494	0	0	1	0	0	0	d	d.81.3.1	A(3-151)
d2gnxa1	147	147	35	22	16	12.320	0.921	0.525	0.341	0.553	0.438	0	0	1	0	0	0	a	a.246.3.1	A(123-294)
d2gnxa2	120	120	28	18	15	7.560	0.848	0.560	0.423	0.609	0.502	0	0	1	0	0	0	d	d.109.3.1	A(295-440)
d2goma1	61	61	21	12	9	2.268	1.000	0.630	0.596	0.513	0.625	0	0	1	1	0	0	a	a.7.17.1	A(105-165)
d2gp4a2	332	332	30	28	25	21.000	0.566	0.535	0.409	0.617	0.480	0	0	1	0	0	0	d	d.334.1.1	A(1-418)
d2gpia1	90	90	23	15	12	4.140	0.852	0.633	0.522	0.667	0.583	0	0	1	1	0	0	d	d.354.1.1	A(1-90)
d2gqba1	130	130	37	16	14	8.288	1.233	0.437	0.341	0.468	0.389	0	1	0	0	0	0	a	a.282.1.1	A(1-130)
d2grga1	97	97	22	19	12	5.016	0.710	0.560	0.452	0.724	0.524	0	0	1	0	0	0	d	d.110.10.1	A(2-98)
d2gria1	112	112	31	21	12	7.812	0.939	0.520	0.375	0.408	0.455	0	0	1	0	0	0	d	d.15.14.1	A(1-112)
d2grrb_	157	157	26	19	18	8.892	0.703	0.594	0.466	0.602	0.548	0	0	1	0	0	0	a	a.118.12.1	B
d2gsva1	67	67	22	15	11	3.630	0.846	0.589	0.472	0.598	0.542	0	0	1	0	0	0	a	a.23.7.1	A(3-69)
d2gtlm1	124	124	28	17	14	6.664	0.903	0.610	0.476	0.511	0.553	0	0	1	0	0	0	b	b.61.7.1	M(102-225)
d2gtlm3	51	51	51	10	8	4.080	2.833	0.286	0.269	0.204	0.284	1	0	0	0	0	1	h	h.1.32.1	M(9-59)
d2guda1	121	121	27	17	15	6.885	0.844	0.490	0.401	0.496	0.455	0	1	0	0	0	0	b	b.77.3.1	A(1-121)
d2guka1	111	111	24	17	15	6.120	0.750	0.494	0.444	0.658	0.485	0	1	0	0	0	0	d	d.360.1.1	A(4-114)
d2h1ta1	186	186	34	22	19	14.212	0.829	0.492	0.348	0.571	0.430	0	1	0	0	0	0	b	b.178.1.1	A(2-187)
d2h1va_	309	309	36	30	21	22.680	0.706	0.565	0.412	0.445	0.498	0	0	1	0	0	0	c	c.92.1.1	A
d2h4oa1	62	62	32	21	16	10.752	0.865	0.219	0.155	0.154	0.189	1	0	0	0	0	0	d	d.368.1.1	A(2-63)
d2h5na1	132	132	32	21	16	10.752	0.865	0.415	0.308	0.524	0.367	0	1	0	0	0	0	a	a.287.1.2	A(1-132)
d2h6fb1	401	401	37	28	25	25.900	0.698	0.575	0.426	0.689	0.511	0	0	1	0	0	0	a	a.102.4.3	B(521-921)
d2h7aa1	108	108	47	21	18	17.766	1.205	0.209	0.160	0.047	0.184	1	0	0	0	0	0	d	d.350.1.1	A(3-110)
d2h8ea_	120	120	28	24	16	10.752	0.700	0.549	0.349	0.670	0.457	0	0	1	0	0	0	d	d.79.6.1	A
d2h9ec_	52	52	28	16	8	3.584	1.167	0.502	0.340	0.623	0.433	0	0	1	0	0	0	g	g.22.1.1	C
d2hbaa1	52	52	19	12	10	2.280	0.864	0.579	0.497	0.630	0.557	0	0	1	0	0	0	d	d.100.1.1	A(1-52)
d2hbwa1	73	73	22	13	11	3.146	0.917	0.628	0.510	0.630	0.571	0	0	1	1	0	0	b	b.34.11.0	A(14-86)
d2hc5a1	108	108	23	20	15	6.900	0.657	0.568	0.420	0.647	0.506	0	0	1	0	0	0	d	d.352.1.1	A(2-109)
d2heqa1	65	65	18	18	11	3.564	0.621	0.633	0.473	0.680	0.565	0	0	1	0	0	0	b	b.34.20.1	A(7-71)
d2hf1a1	59	59	23	14	10	3.220	0.958	0.548	0.422	0.640	0.493	0	0	1	0	0	0	b	b.171.1.1	A(2-60)
d2hfqa1	85	85	20	15	13	3.900	0.714	0.601	0.494	0.608	0.558	0	0	1	0	0	0	d	d.375.1.1	A(1-85)
d2hg4a1	28	28	25	5	5	0.625	2.500	0.845	0.714	0.793	0.786	0	0	1	1	0	1	h	h.1.38.1	A(9-36)
d2hg4a4	84	84	22	14	13	4.004	0.815	0.544	0.456	0.587	0.513	0	0	1	0	0	0	d	d.390.1.1	A(466-549)
d2hg6a1	106	106	29	24	11	7.656	0.829	0.470	0.363	0.654	0.434	0	1	0	0	0	0	d	d.364.1.1	A(1-106)
d2hg7a1	60	60	19	17	13	4.199	0.633	0.536	0.385	0.792	0.467	0	0	1	0	0	0	d	d.186.2.1	A(1-60)
d2hgka1	109	109	25	20	14	7.000	0.735	0.560	0.422	0.523	0.500	0	0	1	0	0	0	a	a.29.17.1	A(1-109)
d2hh8a1	127	127	22	18	16	6.336	0.647	0.588	0.502	0.552	0.553	0	0	1	1	0	0	d	d.358.1.1	A(7-133)
d2hi7b1	134	134	28	20	19	10.640	0.718	0.423	0.342	0.710	0.406	0	1	0	0	0	0	a	a.29.15.1	B(14-162)
d2hiya1	179	179	28	19	17	9.044	0.778	0.555	0.487	0.679	0.533	0	0	1	0	0	0	d	d.356.1.1	A(1-180)
d2hmza_	113	113	23	17	13	5.083	0.767	0.638	0.561	0.347	0.609	0	0	1	1	0	0	a	a.24.4.1	A
d2hnga1	124	124	39	19	12	8.892	1.258	0.553	0.396	0.593	0.488	0	0	1	0	0	0	d	d.33.1.2	A(5-128)
d2hnua_	81	81	19	15	11	3.135	0.731	0.587	0.506	0.737	0.564	0	0	1	1	0	0	b	b.9.1.1	A
d2hp8a_	68	68	21	15	10	3.150	0.840	0.623	0.518	0.704	0.579	0	0	1	1	0	0	a	a.17.1.1	A
d2hq4a1	149	149	29	17	15	7.395	0.906	0.635	0.530	0.588	0.595	0	0	1	1	0	0	d	d.342.1.1	A(1-152)
d2hqsa1	270	270	26	25	22	14.300	0.553	0.517	0.462	0.301	0.500	0	0	1	0	0	0	b	b.68.4.1	A(163-432)
d2hqsa2	139	139	25	20	16	8.000	0.694	0.581	0.425	0.632	0.513	0	0	1	0	0	0	c	c.51.2.1	A(24-162)
d2hqsc2	106	106	24	16	12	4.608	0.857	0.630	0.537	0.672	0.597	0	0	1	1	0	0	d	d.79.7.1	C(68-173)
d2hs1a_	99	99	24	18	12	5.184	0.800	0.504	0.420	0.686	0.474	0	0	1	0	0	0	b	b.50.1.1	A
d2huha1	147	147	28	22	14	8.624	0.778	0.608	0.459	0.636	0.539	0	0	1	0	0	0	b	b.7.5.1	A(81-227)
d2hw4a1	110	110	23	16	14	5.152	0.767	0.642	0.526	0.587	0.599	0	0	1	1	0	0	d	d.322.1.1	A(5-122)
d2hy5a1	130	130	24	21	15	7.560	0.667	0.613	0.461	0.613	0.552	0	0	1	0	0	0	c	c.114.1.1	A(1-130)
d2i06a_	305	305	38	27	24	24.624	0.745	0.278	0.298	0.046	0.286	1	0	0	0	1	0	e	e.2.1.1	A
d2i0za2	165	165	34	16	15	8.160	1.097	0.612	0.492	0.561	0.558	0	0	1	0	0	0	e	e.74.1.1	A(193-361)
d2i15a1	122	122	44	22	16	15.488	1.158	0.329	0.232	0.551	0.291	1	0	0	0	0	0	a	a.291.1.1	A(1-129)
d2i1sa1	178	178	37	26	16	15.392	0.881	0.622	0.382	0.570	0.507	0	0	1	0	0	0	d	d.343.1.1	A(4-188)
d2i53a1	144	144	24	20	15	7.200	0.686	0.612	0.504	0.714	0.572	0	0	1	1	0	0	a	a.74.1.1	A(14-157)
d2i5ha1	178	178	38	21	15	11.970	1.056	0.581	0.427	0.638	0.518	0	0	1	0	0	0	e	e.71.1.1	A(16-195)
d2i5ua1	74	74	17	15	11	2.805	0.654	0.620	0.580	0.498	0.611	0	0	1	1	0	0	a	a.275.1.1	A(2-75)
d2i5vo_	246	246	49	23	15	16.905	1.289	0.506	0.362	0.658	0.442	0	0	1	0	0	0	b	b.76.1.1	O
d2i71a1	368	368	50	30	21	31.500	0.980	0.581	0.369	0.627	0.483	0	0	1	0	0	0	e	e.72.1.1	A(1-377)
d2i8da1	121	121	29	21	19	11.571	0.725	0.330	0.279	0.215	0.316	1	0	0	0	0	0	d	d.198.4.1	A(2-122)
d2i9ia1	221	221	46	20	16	14.720	1.278	0.565	0.416	0.648	0.500	0	0	1	0	0	0	c	c.51.6.1	A(51-271)
d2i9wa2	39	39	24	12	9	2.592	1.143	0.575	0.379	0.767	0.494	0	0	1	0	0	0	g	g.74.1.1	A(1-39)
d2i9xa1	84	84	23	19	15	6.555	0.676	0.526	0.363	0.607	0.456	0	0	1	0	0	0	d	d.366.1.1	A(1-84)
d2ia1a1	164	164	26	23	18	10.764	0.634	0.615	0.456	0.648	0.548	0	0	1	0	0	0	d	d.359.1.1	A(2-166)
d2ia7a1	111	111	26	21	17	9.282	0.684	0.391	0.302	0.679	0.362	0	1	0	0	0	0	d	d.373.1.1	A(23-133)
d2iafa1	140	140	21	20	18	7.560	0.553	0.615	0.482	0.577	0.558	0	0	1	0	0	0	d	d.81.2.1	A(4-148)
d2iaya1	113	113	23	19	16	6.992	0.657	0.558	0.424	0.515	0.507	0	0	1	0	0	0	d	d.376.1.1	A(1-113)
d2icha1	320	320	30	27	23	18.630	0.600	0.576	0.460	0.569	0.526	0	0	1	0	0	0	b	b.176.1.1	A(24-351)
d2icwg_	213	213	34	25	19	16.150	0.773	0.416	0.357	0.509	0.397	0	1	0	0	0	0	a	a.202.1.1	G
d2idla1	112	112	24	17	15	6.120	0.750	0.612	0.469	0.545	0.547	0	0	1	0	0	0	d	d.64.2.1	A(1-112)
d2idob_	75	75	25	18	11	4.950	0.862	0.401	0.345	0.421	0.381	0	1	0	0	0	0	a	a.237.1.1	B
d2igda_	61	61	24	12	9	2.592	1.143	0.629	0.508	0.673	0.579	0	0	1	1	0	0	d	d.15.7.1	A
d2ih2a2	170	170	32	20	14	8.960	0.941	0.630	0.512	0.665	0.584	0	0	1	1	0	0	d	d.287.1.1	A(244-413)
d2ih3c_	98	98	35	14	12	5.880	1.346	0.499	0.402	0.388	0.458	0	1	0	0	0	0	f	f.14.1.1	C
d2ijra1	280	280	42	23	20	19.320	0.977	0.531	0.409	0.417	0.482	0	0	1	0	0	0	e	e.66.1.1	A(3-282)
d2ilka_	155	155	40	27	22	23.760	0.816	0.264	0.192	0.437	0.238	1	0	0	0	0	0	a	a.26.1.3	A
d2im8a_	123	123	32	16	13	6.656	1.103	0.621	0.490	0.582	0.566	0	0	1	0	0	0	a	a.24.26.1	A
d2imqx_	280	280	29	25	22	15.950	0.617	0.592	0.466	0.613	0.539	0	0	1	0	0	0	d	d.151.1.2	X
d2in5a1	194	194	32	25	15	12.000	0.800	0.552	0.420	0.560	0.496	0	0	1	0	0	0	b	b.177.1.1	A(3-199)
d2inwa1	117	117	31	24	13	9.672	0.838	0.458	0.314	0.563	0.395	0	1	0	0	0	0	d	d.110.8.1	A(4-120)
d2ioja1	120	120	18	17	14	4.284	0.581	0.582	0.562	0.595	0.579	0	0	1	1	0	0	c	c.98.2.2	A(206-325)
d2isba2	180	180	30	22	16	10.560	0.789	0.593	0.471	0.635	0.554	0	0	1	0	0	0	c	c.8.9.1	A(1-180)
d2iw5b2	68	68	52	20	10	10.400	1.733	0.042	0.119	0.000	0.085	1	0	0	0	1	0	h	h.1.35.1	B(308-375)
d2ixma1	300	300	30	29	24	20.880	0.566	0.577	0.427	0.614	0.518	0	0	1	0	0	0	a	a.268.1.1	A(23-322)
d2izxa_	39	39	18	13	10	2.340	0.783	0.572	0.393	0.699	0.490	0	0	1	0	0	0	a	a.31.1.1	A
d2j4wd1	34	34	19	9	7	1.197	1.188	0.583	0.499	0.701	0.550	0	0	1	0	0	0	g	g.61.1.1	D(421-454)
d2j6ba1	109	109	22	20	12	5.280	0.688	0.485	0.449	0.559	0.487	0	1	0	0	0	0	d	d.321.1.1	A(1-109)
d2j8ga1	149	149	34	23	17	13.294	0.850	0.496	0.335	0.589	0.426	0	1	0	0	0	0	b	b.109.1.1	A(191-339)
d2j8ka1	174	174	32	15	13	6.240	1.143	0.548	0.567	0.357	0.572	0	0	1	1	1	0	b	b.80.8.1	A(2-175)
d2j9wa1	98	98	25	14	13	4.550	0.926	0.634	0.553	0.583	0.605	0	0	1	1	0	0	a	a.24.28.0	A(123-220)
d2jdig_	184	184	61	19	13	15.067	1.906	0.423	0.328	0.288	0.378	0	1	0	0	0	0	c	c.49.2.1	G
d2jdih1	45	45	23	10	9	2.070	1.211	0.602	0.463	0.679	0.546	0	0	1	0	0	0	a	a.2.10.1	H(101-145)
d2jdih2	43	43	14	13	10	1.820	0.609	0.532	0.506	0.754	0.535	0	0	1	1	0	0	b	b.93.1.1	H(17-100)
d2jdii_	25	25	19	8	6	0.912	1.357	0.597	0.517	0.278	0.553	0	0	1	1	0	0	a	a.137.8.1	I
d2je6a2	84	84	28	15	12	5.040	1.037	0.469	0.391	0.671	0.446	0	1	0	0	0	0	d	d.101.1.1	A(192-275)
d2je6i2	59	59	18	13	9	2.106	0.818	0.630	0.549	0.583	0.604	0	0	1	1	0	0	b	b.84.4.2	I(7-65)
d2jeka1	140	140	23	17	16	6.256	0.697	0.632	0.547	0.658	0.603	0	0	1	1	0	0	a	a.255.1.1	A(6-145)
d2jfra_	234	234	30	23	19	13.110	0.714	0.564	0.442	0.631	0.516	0	0	1	0	0	0	d	d.219.1.0	A
d2jlia_	100	100	23	17	13	5.083	0.767	0.594	0.449	0.717	0.531	0	0	1	0	0	0	d	d.367.1.0	A
d2jn4a1	66	66	15	12	11	1.980	0.652	0.564	0.585	0.328	0.570	0	0	1	1	1	0	b	b.173.1.1	A(1-66)
d2jn9a1	95	95	23	18	13	5.382	0.742	0.558	0.427	0.607	0.499	0	0	1	0	0	0	b	b.45.3.1	A(3-97)
d2jnaa1	96	96	49	20	12	11.760	1.531	0.157	0.172	0.010	0.164	1	0	0	0	1	0	d	d.230.6.1	A(1-96)
d2jnea1	71	71	26	15	11	4.290	1.000	0.474	0.388	0.417	0.443	0	1	0	0	0	0	g	g.41.18.1	A(1-71)
d2joda1	101	101	27	16	14	6.048	0.900	0.594	0.410	0.692	0.503	0	0	1	0	0	0	g	g.76.1.1	A(22-122)
d2joea1	130	130	28	18	16	8.064	0.824	0.513	0.406	0.567	0.471	0	0	1	0	0	0	d	d.371.1.1	A(2-131)
d2joqa1	86	86	29	20	12	6.960	0.906	0.432	0.336	0.352	0.391	0	1	0	0	0	0	d	d.58.54.2	A(4-89)
d2jova1	77	77	26	15	10	3.900	1.040	0.593	0.473	0.548	0.546	0	0	1	0	0	0	d	d.349.1.1	A(1-77)
d2jw6a_	42	42	16	10	8	1.280	0.889	0.653	0.588	0.622	0.633	0	0	1	1	0	0	g	g.85.1.1	A
d2jxta1	78	78	25	15	12	4.500	0.926	0.553	0.441	0.664	0.506	0	0	1	0	0	0	d	d.355.1.1	A(1-78)
d2k2ca1	82	82	33	18	13	7.722	1.065	0.261	0.239	0.364	0.254	1	0	0	0	0	0	g	g.89.1.1	A(1-82)
d2k2ca2	55	55	23	13	8	2.392	1.095	0.585	0.517	0.316	0.557	0	0	1	1	0	0	g	g.93.1.0	A(83-137)
d2k5wa1	108	108	37	23	16	13.616	0.949	0.403	0.247	0.463	0.334	1	0	0	0	0	0	b	b.40.13.1	A(2-109)
d2khla_	93	93	29	18	11	5.742	1.000	0.497	0.395	0.752	0.458	0	1	0	0	0	0	d	d.247.1.1	A
d2kkwa_	140	140	60	42	22	55.440	0.938	0.031	0.047	0.004	0.039	1	0	0	0	1	0	h	h.7.1.1	A
d2l4la_	45	45	21	14	7	2.058	1.000	0.533	0.444	0.661	0.500	0	0	1	0	0	0	g	g.40.1.1	A
d2l6qa_	62	62	23	16	11	4.048	0.852	0.454	0.356	0.470	0.411	0	1	0	0	0	0	d	d.186.1.1	A
d2l9va_	49	49	17	13	9	1.989	0.773	0.629	0.517	0.448	0.577	0	0	1	1	0	0	a	a.159.2.1	A
d2lrra_	70	70	25	14	12	4.200	0.962	0.564	0.416	0.586	0.498	0	0	1	0	0	0	d	d.68.7.1	A
d2m9xa1	101	101	24	16	14	5.376	0.800	0.557	0.473	0.518	0.526	0	0	1	0	0	0	a	a.29.10.1	A(12-112)
d2n29a_	54	54	25	20	8	4.000	0.893	0.289	0.275	0.096	0.281	1	0	0	0	0	0	g	g.34.1.1	A
d2naca2	186	186	24	24	17	9.792	0.585	0.595	0.474	0.544	0.549	0	0	1	0	0	0	c	c.23.12.1	A(1-147,336-374)
d2nlsa_	36	36	15	11	6	0.990	0.882	0.703	0.600	0.855	0.659	0	0	1	1	0	0	g	g.9.1.1	A
d2nlva1	111	111	28	19	14	7.448	0.848	0.568	0.414	0.704	0.509	0	0	1	0	0	0	d	d.326.1.1	A(1-111)
d2nmla1	100	100	27	21	11	6.237	0.844	0.585	0.414	0.637	0.503	0	0	1	0	0	0	d	d.330.1.1	A(2-101)
d2nn4a1	61	61	18	13	10	2.340	0.783	0.607	0.557	0.539	0.591	0	0	1	1	0	0	a	a.272.1.1	A(2-62)
d2nnua2	200	200	40	23	18	16.560	0.976	0.405	0.332	0.607	0.383	0	1	0	0	0	0	b	b.91.1.1	A(1-200)
d2nr5a1	60	60	33	13	6	2.574	1.737	0.626	0.519	0.486	0.584	0	0	1	1	0	0	a	a.25.6.1	A(1-64)
d2nsza1	129	129	23	18	16	6.624	0.676	0.551	0.476	0.733	0.532	0	0	1	0	0	0	a	a.118.1.14	A(322-450)
d2ntka2	202	202	25	21	19	9.975	0.625	0.610	0.502	0.628	0.570	0	0	1	1	0	0	d	d.153.2.1	A(1-202)
d2nw8a_	266	266	38	28	21	22.344	0.776	0.497	0.355	0.560	0.438	0	1	0	0	0	0	a	a.266.1.0	A
d2nxpa1	149	149	24	19	17	7.752	0.667	0.593	0.509	0.632	0.561	0	0	1	1	0	0	d	d.379.1.1	A(195-343)
d2nxya1	304	304	35	31	29	31.465	0.583	0.441	0.287	0.482	0.370	1	0	0	0	0	0	d	d.172.1.1	A(83-491)
d2nyda1	298	298	42	32	25	33.600	0.737	0.392	0.264	0.628	0.337	1	0	0	0	0	0	c	c.135.1.0	A(1-366)
d2o2ka_	332	332	40	30	22	26.400	0.769	0.373	0.341	0.292	0.364	0	1	0	0	0	0	d	d.173.1.0	A
d2o3bb2	134	134	27	22	11	6.534	0.818	0.577	0.479	0.559	0.537	0	0	1	0	0	0	d	d.221.1.1	B(2-135)
d2o3ia1	376	376	34	30	22	22.440	0.654	0.548	0.432	0.546	0.504	0	0	1	0	0	0	e	e.73.1.1	A(2-390)
d2o4ta1	90	90	25	19	14	6.650	0.758	0.338	0.301	0.461	0.330	0	1	0	0	0	0	a	a.69.4.1	A(16-105)
d2o5ha1	125	125	27	21	15	8.505	0.750	0.605	0.437	0.652	0.529	0	0	1	0	0	0	d	d.363.1.1	A(1-131)
d2o6ka1	70	70	18	15	12	3.240	0.667	0.636	0.540	0.505	0.593	0	0	1	1	0	0	a	a.60.15.1	A(4-73)
d2o70a1	165	165	29	21	14	8.526	0.829	0.570	0.487	0.406	0.536	0	0	1	0	0	0	a	a.288.1.1	A(2-166)
d2o8ra1	94	94	34	19	11	7.106	1.133	0.517	0.361	0.603	0.450	0	0	1	0	0	0	a	a.7.15.1	A(4-112)
d2o8sa1	220	220	28	23	17	10.948	0.700	0.538	0.445	0.560	0.492	0	0	1	0	0	0	a	a.295.1.1	A(54-278)
d2o9ux_	96	96	27	15	13	5.265	0.964	0.612	0.482	0.553	0.558	0	0	1	0	0	0	d	d.17.1.1	X
d2oa5a2	88	88	37	16	13	7.696	1.276	0.438	0.290	0.540	0.369	1	0	0	0	0	0	d	d.362.1.1	A(6-102)
d2oara1	118	118	50	29	21	30.450	1.000	0.114	0.102	0.017	0.108	1	0	0	0	0	0	f	f.16.1.1	A(1-118)
d2ob5a1	147	147	25	19	15	7.125	0.735	0.612	0.492	0.585	0.561	0	0	1	0	0	0	c	c.133.1.1	A(1-147)
d2od0a1	103	103	22	19	17	7.106	0.611	0.573	0.395	0.630	0.498	0	0	1	0	0	0	d	d.198.5.2	A(3-105)
d2odka1	51	51	21	14	8	2.352	0.955	0.560	0.459	0.681	0.525	0	0	1	0	0	0	d	d.306.1.1	A(1-51)
d2oeba1	152	152	24	21	16	8.064	0.649	0.606	0.493	0.654	0.570	0	0	1	0	0	0	a	a.70.2.1	A(2-153)
d2oeea1	92	92	32	18	12	6.912	1.067	0.307	0.300	0.227	0.306	0	1	0	0	0	0	a	a.281.1.2	A(3-112)
d2oeza1	240	240	37	30	19	21.090	0.755	0.390	0.301	0.505	0.355	0	1	0	0	0	0	e	e.68.1.1	A(2-245)
d2ofca_	141	141	23	20	13	5.980	0.697	0.626	0.551	0.724	0.596	0	0	1	1	0	0	b	b.97.1.2	A
d2ogfa1	119	119	30	19	13	7.410	0.938	0.609	0.446	0.513	0.534	0	0	1	0	0	0	d	d.316.1.0	A(2-120)
d2ohwa1	128	128	20	17	15	5.100	0.625	0.600	0.538	0.557	0.580	0	0	1	1	0	0	d	d.79.8.1	A(3-130)
d2oj5b1	20	20	11	9	5	0.495	0.786	0.581	0.525	0.895	0.562	0	0	1	1	0	0	b	b.83.1.0	B(293-312)
d2okua1	122	122	31	16	12	5.952	1.107	0.603	0.506	0.682	0.564	0	0	1	1	0	0	a	a.48.5.1	A(443-564)
d2ot3a_	253	253	43	24	17	17.544	1.049	0.583	0.413	0.591	0.511	0	0	1	0	0	0	a	a.222.1.1	A
d2otaa1	62	62	23	16	13	4.784	0.793	0.243	0.265	0.072	0.254	1	0	0	0	1	0	a	a.284.1.1	A(7-68)
d2ouxa1	130	130	30	17	14	7.140	0.968	0.608	0.496	0.659	0.564	0	0	1	0	0	0	a	a.118.26.1	A(6-135)
d2ox7a1	142	142	39	22	18	15.444	0.975	0.465	0.284	0.634	0.386	1	0	0	0	0	0	b	b.172.1.1	A(4-145)
d2oy9a1	85	85	23	17	13	5.083	0.767	0.579	0.457	0.631	0.534	0	0	1	0	0	0	a	a.276.1.1	A(6-90)
d2p02a1	110	110	36	27	13	12.636	0.900	0.283	0.212	0.184	0.247	1	0	0	0	0	0	d	d.130.1.1	A(38-147)
d2p0ta1	148	148	43	20	15	12.900	1.229	0.311	0.292	0.108	0.306	1	0	0	0	0	0	a	a.290.1.1	A(22-169)
d2p12a1	165	165	25	23	20	11.500	0.581	0.529	0.410	0.512	0.482	0	0	1	0	0	0	b	b.175.1.1	A(8-172)
d2p2ua1	150	150	53	35	17	31.535	1.019	0.036	0.094	0.000	0.068	1	0	0	0	1	0	h	h.4.18.1	A(9-161)
d2p3pa1	197	197	36	22	17	13.464	0.923	0.550	0.406	0.574	0.492	0	0	1	0	0	0	d	d.383.1.1	A(66-262)
d2p5ka_	63	63	19	12	10	2.280	0.864	0.609	0.564	0.534	0.591	0	0	1	1	0	0	a	a.4.5.3	A
d2p5ma_	82	82	19	16	9	2.736	0.760	0.633	0.562	0.563	0.600	0	0	1	1	0	0	d	d.74.2.1	A
d2p5zx1	71	71	19	17	13	4.199	0.633	0.558	0.413	0.603	0.493	0	0	1	0	0	0	b	b.40.8.1	X(378-468)
d2p62a1	241	241	34	24	19	15.504	0.791	0.561	0.439	0.503	0.512	0	0	1	0	0	0	e	e.67.1.1	A(1-241)
d2p6va1	97	97	24	16	14	5.376	0.800	0.560	0.445	0.604	0.513	0	0	1	0	0	0	a	a.277.1.1	A(582-678)
d2p8ia2	116	116	25	19	14	6.650	0.758	0.604	0.476	0.618	0.557	0	0	1	0	0	0	d	d.58.55.1	A(1-116)
d2p8qb_	39	39	34	9	9	2.754	1.889	0.288	0.277	0.252	0.286	1	0	0	0	0	0	g	g.88.2.1	B
d2p90a1	269	269	33	33	21	22.869	0.611	0.437	0.318	0.585	0.387	0	1	0	0	0	0	c	c.56.8.1	A(6-274)
d2pbka_	228	228	27	23	20	12.420	0.628	0.588	0.462	0.555	0.531	0	0	1	0	0	0	b	b.57.1.1	A
d2pefa_	366	366	38	25	22	20.900	0.809	0.579	0.459	0.685	0.533	0	0	1	0	0	0	e	e.1.1.0	A
d2phcb2	84	84	22	16	10	3.520	0.846	0.575	0.505	0.478	0.547	0	0	1	1	0	0	d	d.74.5.1	B(2-85)
d2phna_	248	248	35	28	17	16.660	0.778	0.489	0.383	0.588	0.447	0	1	0	0	0	0	d	d.340.1.1	A
d2pifa1	252	252	30	24	17	12.240	0.732	0.525	0.484	0.409	0.516	0	0	1	0	0	0	d	d.382.1.1	A(7-262)
d2pjua1	186	186	32	21	16	10.752	0.865	0.528	0.442	0.635	0.499	0	0	1	0	0	0	c	c.92.3.1	A(11-196)
d2pk8a_	94	94	24	15	12	4.320	0.889	0.620	0.524	0.567	0.583	0	0	1	1	0	0	d	d.274.1.1	A
d2pkgc1	80	80	19	17	16	5.168	0.576	0.533	0.392	0.619	0.474	0	0	1	0	0	0	g	g.92.1.1	C(91-170)
d2pmra1	75	75	24	13	10	3.120	1.043	0.597	0.547	0.519	0.584	0	0	1	1	0	0	a	a.8.11.1	A(3-77)
d2pmsc1	105	105	46	19	12	10.488	1.484	0.442	0.284	0.580	0.373	1	0	0	0	0	0	h	h.4.19.1	C(168-288)
d2prva1	152	152	32	20	18	11.520	0.842	0.583	0.398	0.533	0.504	0	0	1	0	0	0	d	d.369.1.1	A(1-152)
d2psba1	290	290	30	26	22	17.160	0.625	0.587	0.466	0.674	0.542	0	0	1	0	0	0	c	c.153.1.1	A(13-308)
d2pv4a1	144	144	30	21	18	11.340	0.769	0.543	0.362	0.628	0.469	0	0	1	0	0	0	a	a.286.1.1	A(1-144)
d2pvba_	107	107	18	16	14	4.032	0.600	0.608	0.567	0.556	0.595	0	0	1	1	0	0	a	a.39.1.4	A
d2pwwa1	113	113	26	16	13	5.408	0.897	0.583	0.492	0.734	0.547	0	0	1	0	0	0	d	d.129.11.1	A(2-114)
d2pyqa1	113	113	21	17	14	4.998	0.677	0.613	0.517	0.810	0.577	0	0	1	1	0	0	a	a.279.1.1	A(1-113)
d2q03a1	133	133	33	16	12	6.336	1.179	0.555	0.468	0.520	0.517	0	0	1	0	0	0	b	b.159.2.1	A(5-137)
d2q22a1	130	130	25	19	15	7.125	0.735	0.611	0.486	0.588	0.561	0	0	1	0	0	0	d	d.365.1.1	A(8-138)
d2q2ga1	83	83	31	14	12	5.208	1.192	0.517	0.409	0.391	0.469	0	0	1	0	0	0	b	b.4.1.0	A(4-86)
d2q3ta_	121	121	29	21	12	7.308	0.879	0.629	0.459	0.653	0.552	0	0	1	0	0	0	a	a.220.1.1	A
d2q40a_	343	343	34	29	21	20.706	0.680	0.550	0.447	0.625	0.511	0	0	1	0	0	0	e	e.50.1.1	A
d2q43a2	102	102	27	17	10	4.590	1.000	0.611	0.496	0.575	0.564	0	0	1	0	0	0	d	d.58.19.1	A(195-313)
d2q4ia_	174	174	32	20	15	9.600	0.914	0.583	0.473	0.507	0.536	0	0	1	0	0	0	b	b.159.1.1	A
d2q4ma_	162	162	22	21	18	8.316	0.564	0.601	0.512	0.722	0.569	0	0	1	1	0	0	d	d.23.1.2	A
d2q6ka1	163	163	22	17	17	6.358	0.647	0.618	0.562	0.590	0.602	0	0	1	1	0	0	c	c.132.1.0	A(1-163)
d2q6ka2	86	86	18	16	14	4.032	0.600	0.599	0.511	0.719	0.566	0	0	1	1	0	0	b	b.141.1.0	A(177-271)
d2q9qa1	114	114	38	16	10	6.080	1.462	0.529	0.459	0.514	0.501	0	0	1	0	0	0	a	a.278.1.2	A(62-175)
d2q9qa2	61	61	21	15	9	2.835	0.875	0.579	0.466	0.650	0.539	0	0	1	0	0	0	d	d.344.1.0	A(1-61)
d2qdla1	146	146	25	21	17	8.925	0.658	0.601	0.453	0.496	0.539	0	0	1	0	0	0	b	b.40.7.0	A(10-155)
d2qdva_	105	105	20	16	13	4.160	0.690	0.642	0.557	0.678	0.608	0	0	1	1	0	0	b	b.6.1.1	A
d2qfaa_	137	137	42	22	16	14.784	1.105	0.395	0.265	0.502	0.332	1	0	0	0	0	0	g	g.52.1.1	A
d2qi9a_	324	324	37	31	21	24.087	0.712	0.537	0.374	0.631	0.471	0	0	1	0	0	0	f	f.22.1.1	A
d2qklb_	90	90	23	16	12	4.416	0.821	0.614	0.520	0.517	0.579	0	0	1	1	0	0	a	a.242.1.1	B
d2qkwa1	101	101	32	14	13	5.824	1.185	0.596	0.455	0.509	0.537	0	0	1	0	0	0	a	a.8.8.1	A(29-129)
d2qn6b_	90	90	24	16	11	4.224	0.889	0.599	0.507	0.448	0.555	0	0	1	1	0	0	d	d.58.51.1	B
d2qp2a2	148	148	27	19	18	9.234	0.730	0.584	0.426	0.482	0.513	0	0	1	0	0	0	b	b.77.4.1	A(358-509)
d2qsba1	85	85	24	15	12	4.320	0.889	0.591	0.492	0.572	0.554	0	0	1	0	0	0	a	a.29.14.1	A(2-86)
d2quda1	122	122	30	25	16	12.000	0.732	0.359	0.265	0.384	0.324	1	0	0	0	0	0	d	d.85.1.1	A(0-127)
d2qupa_	119	119	36	16	12	6.912	1.286	0.572	0.461	0.614	0.533	0	0	1	0	0	0	a	a.24.29.0	A
d2qvja_	421	421	52	43	26	58.136	0.754	0.334	0.211	0.493	0.279	1	0	0	0	0	0	a	a.260.1.1	A
d2qyfa_	197	197	32	22	20	14.080	0.762	0.592	0.414	0.502	0.509	0	0	1	0	0	0	d	d.135.1.1	A
d2r31a2	235	235	39	26	15	15.210	0.951	0.456	0.377	0.451	0.423	0	1	0	0	0	0	d	d.381.1.1	A(4-238)
d2r7ja1	165	165	29	24	19	13.224	0.674	0.546	0.364	0.661	0.462	0	0	1	0	0	0	d	d.13.2.1	A(144-312)
d2r7ja2	142	142	27	22	16	9.504	0.711	0.590	0.420	0.675	0.516	0	0	1	0	0	0	d	d.216.1.1	A(2-143)
d2rbka_	261	261	28	20	19	10.640	0.718	0.607	0.544	0.637	0.578	0	0	1	1	0	0	c	c.108.1.10	A
d2rd0b_	139	139	79	15	11	13.035	3.038	0.405	0.299	0.524	0.365	1	0	0	0	0	1	h	h.4.21.1	B
d2rh2a_	58	58	18	13	12	2.808	0.720	0.676	0.501	0.479	0.586	0	0	1	1	0	0	b	b.34.4.1	A
d2rk3a_	187	187	24	21	19	9.576	0.600	0.628	0.484	0.545	0.564	0	0	1	0	0	0	c	c.23.16.2	A
d2rlda1	113	113	31	14	13	5.642	1.148	0.619	0.517	0.465	0.580	0	0	1	1	0	0	a	a.29.16.1	A(1-115)
d2rr4a1	62	62	21	16	12	4.032	0.750	0.468	0.363	0.637	0.435	0	1	0	0	0	0	g	g.50.2.1	A(246-307)
d2saka_	121	121	30	21	15	9.450	0.833	0.502	0.357	0.653	0.442	0	0	1	0	0	0	d	d.15.5.1	A
d2tpsa1	222	222	25	23	18	10.350	0.610	0.603	0.502	0.636	0.564	0	0	1	1	0	0	c	c.1.3.1	A(14-235)
d2uv4a1	143	143	29	21	16	9.744	0.784	0.506	0.397	0.536	0.470	0	0	1	0	0	0	d	d.37.1.0	A(182-324)
d2v1ya_	90	90	20	17	12	4.080	0.690	0.579	0.513	0.641	0.558	0	0	1	1	0	0	d	d.15.15.1	A
d2v2ba_	272	272	36	21	20	15.120	0.878	0.576	0.454	0.627	0.527	0	0	1	0	0	0	c	c.74.1.1	A
d2v8qb1	73	73	48	21	14	14.112	1.371	0.168	0.121	0.225	0.148	1	0	0	0	0	0	d	d.353.1.1	B(190-272)
d2v94a1	93	93	25	15	12	4.500	0.926	0.612	0.516	0.628	0.577	0	0	1	1	0	0	d	d.12.1.3	A(1-93)
d2vb1a_	129	129	24	16	14	5.376	0.800	0.588	0.538	0.579	0.568	0	0	1	1	0	0	d	d.2.1.2	A
d2vboa_	153	153	29	21	16	9.744	0.784	0.515	0.424	0.656	0.487	0	0	1	0	0	0	d	d.95.2.1	A
d2vbua_	131	131	25	20	14	7.000	0.735	0.572	0.476	0.667	0.537	0	0	1	0	0	0	b	b.43.5.2	A
d2vfra1	238	238	31	23	20	14.260	0.721	0.368	0.367	0.352	0.371	0	1	0	0	0	0	d	d.58.32.6	A(180-417)
d2vgha_	55	55	29	14	8	3.248	1.318	0.535	0.393	0.737	0.477	0	0	1	0	0	0	g	g.25.1.1	A
d2vgna1	122	122	24	22	14	7.392	0.667	0.592	0.449	0.639	0.528	0	0	1	0	0	0	b	b.38.4.1	A(1-135)
d2vn6b_	64	64	17	14	12	2.856	0.654	0.594	0.503	0.288	0.556	0	0	1	1	0	0	a	a.139.1.0	B
d2vpaa_	204	204	46	29	18	24.012	0.979	0.334	0.228	0.414	0.288	1	0	0	0	0	0	b	b.45.1.1	A
d2vv5a2	101	101	41	20	13	10.660	1.242	0.398	0.284	0.510	0.352	1	0	0	0	0	0	d	d.58.43.1	A(180-280)
d2vv5a3	86	86	29	19	10	5.510	1.000	0.452	0.341	0.531	0.408	0	1	0	0	0	0	f	f.34.1.1	A(27-112)
d2vy6a2	56	56	17	14	11	2.618	0.680	0.641	0.502	0.656	0.582	0	0	1	1	0	0	d	d.361.1.0	A(686-741)
d2vy8a_	152	152	33	20	17	11.220	0.892	0.570	0.388	0.589	0.489	0	0	1	0	0	0	d	d.396.1.1	A
d2w1va_	274	274	30	27	22	17.820	0.612	0.573	0.426	0.607	0.514	0	0	1	0	0	0	d	d.160.1.0	A
d2w6ka1	139	139	28	17	15	7.140	0.875	0.595	0.450	0.705	0.532	0	0	1	0	0	0	c	c.151.1.1	A(1-139)
d2w9ja_	71	71	21	14	10	2.940	0.875	0.608	0.523	0.620	0.571	0	0	1	1	0	0	d	d.49.1.0	A
d2wb0x1	89	89	27	18	14	6.804	0.844	0.587	0.387	0.609	0.495	0	0	1	0	0	0	a	a.54.1.1	X(177-265)
d2wb0x2	89	89	29	18	13	6.786	0.935	0.432	0.324	0.472	0.385	0	1	0	0	0	0	g	g.51.1.1	X(266-385)
d2wdsa_	123	123	25	18	15	6.750	0.758	0.577	0.429	0.713	0.512	0	0	1	0	0	0	d	d.150.1.0	A
d2wfia_	172	172	21	20	19	7.980	0.538	0.613	0.532	0.694	0.588	0	0	1	1	0	0	b	b.62.1.1	A
d2wkxa1	82	82	20	17	12	4.080	0.690	0.647	0.496	0.628	0.574	0	0	1	0	0	0	a	a.20.1.1	A(180-261)
d2wlva_	144	144	28	21	12	7.056	0.848	0.633	0.502	0.735	0.581	0	0	1	1	0	0	a	a.73.1.1	A
d2wnpf_	217	217	29	21	16	9.744	0.784	0.623	0.548	0.658	0.593	0	0	1	1	0	0	d	d.171.1.0	F
d2wnya_	137	137	27	17	16	7.344	0.818	0.579	0.484	0.637	0.546	0	0	1	0	0	0	d	d.77.1.0	A
d2woea_	291	291	27	25	22	14.850	0.574	0.611	0.505	0.546	0.570	0	0	1	1	0	0	a	a.209.1.0	A
d2wqka_	248	248	36	33	24	28.512	0.632	0.280	0.228	0.429	0.260	1	0	0	0	0	0	c	c.106.1.0	A
d2wzba_	405	405	38	26	24	23.712	0.760	0.514	0.438	0.361	0.489	0	0	1	0	0	0	c	c.86.1.1	A
d2x41a3	122	122	31	14	13	5.642	1.148	0.558	0.478	0.562	0.528	0	0	1	0	0	0	b	b.1.31.0	A(600-721)
d2x63a_	258	258	30	25	19	14.250	0.682	0.543	0.494	0.561	0.537	0	0	1	0	0	0	c	c.130.1.1	A
d2xaua4	114	114	29	19	14	7.714	0.879	0.577	0.415	0.584	0.509	0	0	1	0	0	0	a	a.289.1.0	A(521-634)
d2xiwa_	64	64	17	14	12	2.856	0.654	0.620	0.494	0.727	0.570	0	0	1	0	0	0	b	b.34.13.1	A
d2xjpa1	249	249	36	21	20	15.120	0.878	0.553	0.423	0.551	0.499	0	0	1	0	0	0	b	b.179.1.2	A(23-271)
d2xola1	166	166	26	24	15	9.360	0.667	0.632	0.476	0.567	0.560	0	0	1	0	0	0	a	a.184.1.1	A(1-166)
d2xova_	181	181	28	20	20	11.200	0.700	0.611	0.455	0.602	0.542	0	0	1	0	0	0	f	f.51.1.1	A
d2xu3a_	220	220	31	19	16	9.424	0.886	0.615	0.540	0.641	0.591	0	0	1	1	0	0	d	d.3.1.0	A
d2xw6a1	128	128	22	17	14	5.236	0.710	0.589	0.534	0.634	0.579	0	0	1	1	0	0	c	c.24.1.2	A(1-128)
d2xysa_	205	205	41	24	14	13.776	1.079	0.534	0.398	0.571	0.478	0	0	1	0	0	0	b	b.96.1.0	A
d2xzga1	330	330	34	29	26	25.636	0.618	0.527	0.375	0.420	0.456	0	0	1	0	0	0	b	b.69.6.1	A(1-330)
d2y0ta_	52	52	20	12	8	1.920	1.000	0.636	0.570	0.474	0.612	0	0	1	1	0	0	a	a.274.1.1	A
d2y5fl_	54	54	24	13	10	3.120	1.043	0.529	0.394	0.563	0.470	0	0	1	0	0	0	g	g.3.11.1	L
d2y8ya1	82	82	19	16	13	3.952	0.655	0.611	0.501	0.502	0.559	0	0	1	1	0	0	d	d.58.53.0	A(1-87)
d2ygsa_	92	92	19	14	13	3.458	0.704	0.610	0.586	0.629	0.601	0	0	1	1	0	0	a	a.77.1.3	A
d2yima_	355	355	41	25	24	24.600	0.837	0.337	0.333	0.305	0.344	0	1	0	0	0	0	c	c.123.1.1	A
d2yivx_	635	635	42	37	30	46.620	0.627	0.530	0.383	0.566	0.471	0	0	1	0	0	0	e	e.26.1.2	X
d2ykza_	127	127	29	16	15	6.960	0.935	0.535	0.443	0.390	0.498	0	0	1	0	0	0	a	a.24.3.2	A
d2ylba_	65	65	17	15	12	3.060	0.630	0.555	0.472	0.503	0.519	0	0	1	0	0	0	b	b.38.1.2	A
d2yvea2	101	101	24	21	16	8.064	0.649	0.386	0.327	0.358	0.367	0	1	0	0	0	0	a	a.121.1.1	A(75-175)
d2z0aa_	72	72	22	17	11	4.114	0.786	0.531	0.406	0.745	0.479	0	0	1	0	0	0	a	a.16.1.1	A
d2z16a1	149	149	22	18	16	6.336	0.647	0.624	0.539	0.536	0.585	0	0	1	1	0	0	a	a.95.1.1	A(2-158)
d2z1ea1	113	113	29	17	12	5.916	1.000	0.609	0.449	0.625	0.537	0	0	1	0	0	0	d	d.79.4.1	A(43-155)
d2z1ea2	179	179	26	23	15	8.970	0.684	0.558	0.447	0.518	0.507	0	0	1	0	0	0	d	d.139.1.1	A(156-334)
d2z48a3	149	149	28	17	15	7.140	0.875	0.591	0.486	0.697	0.553	0	0	1	0	0	0	d	d.281.1.1	A(284-432)
d2z4ua_	261	261	33	23	19	14.421	0.786	0.598	0.485	0.640	0.554	0	0	1	0	0	0	d	d.165.1.1	A
d2z51a1	82	82	23	16	10	3.680	0.885	0.559	0.467	0.521	0.519	0	0	1	0	0	0	d	d.52.8.0	A(1-82)
d2z6ra_	264	264	37	24	20	17.760	0.841	0.489	0.398	0.357	0.450	0	1	0	0	0	0	c	c.90.1.1	A
d2z7fi_	50	50	21	14	9	2.646	0.913	0.536	0.433	0.803	0.507	0	0	1	0	0	0	g	g.3.14.0	I
d2zhja_	315	315	41	23	22	20.746	0.911	0.543	0.421	0.530	0.495	0	0	1	0	0	0	a	a.65.1.1	A
d2zjr31	63	63	26	14	10	3.640	1.083	0.183	0.121	0.153	0.150	1	0	0	0	0	0	d	d.301.1.1	3(2-64)
d2zjr41	37	37	17	10	8	1.360	0.944	0.630	0.568	0.720	0.617	0	0	1	1	0	0	g	g.42.1.1	4(1-37)
d2zjrn1	117	117	60	19	13	14.820	1.875	0.308	0.231	0.337	0.276	1	0	0	0	0	0	a	a.144.2.1	N(2-118)
d2zjro1	94	94	41	20	12	9.840	1.281	0.288	0.236	0.309	0.266	1	0	0	0	0	0	b	b.155.1.1	O(5-98)
d2zjru1	72	72	38	14	9	4.788	1.652	0.206	0.262	0.033	0.233	1	0	0	0	1	0	d	d.325.1.1	U(8-79)
d2znra1	173	173	24	22	19	10.032	0.585	0.589	0.452	0.603	0.530	0	0	1	0	0	0	c	c.97.3.1	A(264-436)
d2zw2a_	85	85	30	19	10	5.700	1.034	0.424	0.370	0.506	0.407	0	1	0	0	0	0	d	d.284.1.0	A
d2zxeb1	41	41	43	8	6	2.064	3.071	0.512	0.401	0.405	0.464	0	0	1	0	0	1	f	f.23.42.1	B(28-68)
d2zxeb2	224	224	31	26	20	16.120	0.674	0.557	0.392	0.573	0.481	0	0	1	0	0	0	b	b.1.32.1	B(69-305)
d2zxeg_	39	39	39	8	6	1.872	2.786	0.545	0.435	0.414	0.492	0	0	1	0	0	1	f	f.23.43.1	G
d2zy9a3	174	174	35	25	17	14.875	0.833	0.439	0.305	0.458	0.382	0	1	0	0	0	0	f	f.57.1.1	A(276-449)
d3a02a_	51	51	15	13	9	1.755	0.682	0.612	0.572	0.688	0.607	0	0	1	1	0	0	a	a.4.1.1	A
d3a0hy_	28	28	26	7	4	0.728	2.364	0.723	0.594	0.883	0.673	0	0	1	1	0	1	f	f.23.41.1	Y
d3a5cg_	129	129	67	10	9	6.030	3.526	0.420	0.332	0.689	0.392	0	1	0	0	0	1	h	h.4.20.1	G
d3a9sa1	359	359	54	26	20	28.080	1.174	0.485	0.355	0.601	0.431	0	1	0	0	0	0	c	c.85.1.0	A(2-360)
d3a9sa2	230	230	36	25	23	20.700	0.750	0.517	0.322	0.550	0.425	0	0	1	0	0	0	b	b.43.2.0	A(361-590)
d3aa0a_	270	270	49	32	22	34.496	0.907	0.334	0.238	0.360	0.296	1	0	0	0	0	0	e	e.43.1.1	A
d3agna_	114	114	24	17	15	6.120	0.750	0.632	0.464	0.673	0.557	0	0	1	0	0	0	d	d.1.1.4	A
d3aiaa1	199	199	27	24	17	11.016	0.659	0.612	0.487	0.635	0.565	0	0	1	0	0	0	c	c.116.1.0	A(2-200)
d3amra_	352	352	32	25	23	18.400	0.667	0.585	0.499	0.428	0.559	0	0	1	0	0	0	b	b.68.3.1	A
d3ar4a1	472	472	65	37	26	62.530	1.032	0.387	0.231	0.303	0.311	1	0	0	0	0	0	f	f.33.1.1	A(1-124,240-343,751-994)
d3ar4a2	115	115	24	19	15	6.840	0.706	0.589	0.427	0.698	0.520	0	0	1	0	0	0	b	b.82.7.1	A(125-239)
d3ar4a4	239	239	30	28	21	17.640	0.612	0.564	0.389	0.683	0.492	0	0	1	0	0	0	d	d.220.1.1	A(361-599)
d3awua1	272	272	29	22	20	12.760	0.690	0.629	0.540	0.656	0.594	0	0	1	1	0	0	a	a.86.1.3	A(2-273)
d3awub_	78	78	18	17	12	3.672	0.621	0.572	0.473	0.696	0.535	0	0	1	0	0	0	d	d.386.1.1	B
d3axja1	221	221	49	22	17	18.326	1.256	0.396	0.316	0.469	0.363	0	1	0	0	0	0	a	a.118.16.0	A(1-221)
d3b0ga1	157	157	33	23	17	12.903	0.825	0.409	0.334	0.545	0.382	0	1	0	0	0	0	d	d.58.36.0	A(18-174)
d3b0ga2	171	171	26	21	19	10.374	0.650	0.615	0.442	0.602	0.533	0	0	1	0	0	0	d	d.134.1.0	A(175-345)
d3b64a_	112	112	27	19	14	7.182	0.818	0.555	0.409	0.567	0.494	0	0	1	0	0	0	d	d.80.1.0	A
d3bbba_	151	151	27	20	16	8.640	0.750	0.593	0.472	0.682	0.543	0	0	1	0	0	0	d	d.58.6.1	A
d3beca1	93	93	27	13	10	3.510	1.174	0.596	0.526	0.536	0.567	0	0	1	1	0	0	b	b.105.1.1	A(263-355)
d3bgea1	163	163	41	20	19	15.580	1.051	0.287	0.262	0.154	0.280	1	0	0	0	0	0	a	a.80.1.2	A(251-434)
d3bhda_	211	211	30	23	17	11.730	0.750	0.522	0.447	0.389	0.490	0	0	1	0	0	0	d	d.63.1.2	A
d3bhpa_	52	52	27	11	10	2.970	1.286	0.394	0.375	0.432	0.395	0	1	0	0	0	0	a	a.2.21.1	A
d3bida1	56	56	21	17	13	4.641	0.700	0.339	0.274	0.487	0.313	1	0	0	0	0	0	d	d.348.1.1	A(1-56)
d3blda_	348	348	36	27	23	22.356	0.720	0.505	0.419	0.548	0.475	0	0	1	0	0	0	c	c.1.20.1	A
d3bmva2	105	105	22	17	13	4.862	0.733	0.643	0.533	0.635	0.601	0	0	1	1	0	0	b	b.3.1.1	A(579-683)
d3bn0a1	95	95	25	15	13	4.875	0.893	0.607	0.502	0.466	0.564	0	0	1	1	0	0	d	d.27.1.1	A(2-102)
d3boea_	209	209	24	20	18	8.640	0.632	0.599	0.553	0.708	0.584	0	0	1	1	0	0	c	c.154.1.1	A
d3bofa1	260	260	27	26	21	14.742	0.574	0.545	0.456	0.570	0.511	0	0	1	0	0	0	c	c.1.21.2	A(301-560)
d3bofa2	300	300	28	25	22	15.400	0.596	0.527	0.475	0.533	0.513	0	0	1	0	0	0	c	c.1.26.1	A(1-300)
d3boya_	147	147	27	21	18	10.206	0.692	0.589	0.395	0.645	0.498	0	0	1	0	0	0	d	d.275.1.1	A
d3bp3a_	81	81	19	15	14	3.990	0.655	0.587	0.446	0.491	0.522	0	0	1	0	0	0	d	d.95.1.1	A
d3bpda1	89	89	23	18	11	4.554	0.793	0.577	0.477	0.581	0.541	0	0	1	0	0	0	d	d.58.61.1	A(2-90)
d3bq9a1	132	132	28	20	17	9.520	0.757	0.498	0.363	0.650	0.442	0	1	0	0	0	0	d	d.58.65.0	A(3-138)
d3bq9a3	101	101	25	18	16	7.200	0.735	0.524	0.373	0.648	0.459	0	0	1	0	0	0	f	f.68.2.0	A(350-450)
d3bqoa_	202	202	41	24	16	15.744	1.025	0.557	0.361	0.581	0.463	0	0	1	0	0	0	a	a.146.1.1	A
d3brfa3	158	158	23	22	20	10.120	0.548	0.596	0.432	0.622	0.524	0	0	1	0	0	0	b	b.42.7.1	A(381-541)
d3bula1	90	90	26	20	11	5.720	0.839	0.593	0.421	0.664	0.516	0	0	1	0	0	0	a	a.46.1.1	A(651-740)
d3bvxa1	111	111	41	15	10	6.150	1.640	0.610	0.472	0.620	0.555	0	0	1	0	0	0	a	a.8.3.1	A(412-522)
d3bvxa2	522	522	43	36	29	44.892	0.662	0.437	0.330	0.471	0.395	0	1	0	0	0	0	b	b.30.5.6	A(523-1044)
d3bvxa3	381	381	37	30	25	27.750	0.673	0.589	0.422	0.611	0.517	0	0	1	0	0	0	c	c.6.2.1	A(31-411)
d3bypa1	82	82	22	13	12	3.432	0.880	0.586	0.532	0.609	0.570	0	0	1	1	0	0	d	d.52.9.1	A(6-87)
d3byqa1	191	191	32	21	16	10.752	0.865	0.603	0.450	0.717	0.535	0	0	1	0	0	0	d	d.79.9.1	A(2-192)
d3bzca3	324	324	51	32	22	35.904	0.944	0.337	0.257	0.457	0.305	1	0	0	0	0	0	a	a.294.1.1	A(1-324)
d3c3da1	303	303	34	25	21	17.850	0.739	0.532	0.444	0.469	0.495	0	0	1	0	0	0	c	c.143.1.1	A(1-303)
d3c8ga1	165	165	34	18	16	9.792	1.000	0.604	0.459	0.562	0.537	0	0	1	0	0	0	a	a.285.1.1	A(1-168)
d3c8wa1	250	250	35	29	20	20.300	0.714	0.451	0.330	0.660	0.405	0	1	0	0	0	0	d	d.347.1.1	A(5-254)
d3c98a_	556	556	42	39	32	52.416	0.592	0.439	0.314	0.416	0.387	0	1	0	0	0	0	e	e.25.1.1	A
d3ccda_	85	85	19	13	12	2.964	0.760	0.574	0.567	0.529	0.580	0	0	1	1	0	0	d	d.94.1.1	A
d3ci0k1	64	64	17	13	12	2.652	0.680	0.587	0.516	0.390	0.554	0	0	1	1	0	0	a	a.60.16.1	K(204-274)
d3ci3a1	187	187	36	21	19	14.364	0.900	0.502	0.352	0.654	0.438	0	0	1	0	0	0	a	a.25.2.0	A(2-188)
d3cima1	89	89	22	17	8	2.992	0.880	0.607	0.536	0.506	0.577	0	0	1	1	0	0	d	d.58.56.1	A(3-91)
d3cjrb1	48	48	17	11	9	1.683	0.850	0.507	0.487	0.551	0.496	0	0	1	0	0	0	a	a.4.7.1	B(71-137)
d3cjsb1	70	70	20	13	10	2.600	0.870	0.621	0.534	0.698	0.588	0	0	1	1	0	0	d	d.47.1.1	B(1-70)
d3cr3a1	192	192	27	20	15	8.100	0.771	0.597	0.544	0.503	0.582	0	0	1	1	0	0	a	a.208.1.1	A(1-192)
d3ct6a1	123	123	20	18	17	6.120	0.571	0.615	0.500	0.603	0.569	0	0	1	1	0	0	c	c.54.1.2	A(1-123)
d3cu9a_	314	314	29	26	23	17.342	0.592	0.606	0.504	0.462	0.573	0	0	1	1	0	0	b	b.67.2.1	A
d3cwca1	368	368	45	26	22	25.740	0.938	0.493	0.380	0.452	0.445	0	1	0	0	0	0	c	c.141.1.0	A(1-380)
d3cx5c1	124	124	42	16	14	9.408	1.400	0.543	0.368	0.692	0.465	0	0	1	0	0	0	f	f.32.1.0	C(262-385)
d3cx5d2	49	49	54	13	7	4.914	2.700	0.204	0.210	0.388	0.213	1	0	0	0	1	1	f	f.23.11.1	D(261-309)
d3cx5e2	56	56	50	15	9	6.750	2.083	0.204	0.175	0.064	0.189	1	0	0	0	0	1	f	f.23.12.1	E(31-86)
d3cx5f_	74	74	34	15	12	6.120	1.259	0.428	0.327	0.288	0.384	0	1	0	0	0	0	f	f.28.1.1	F
d3cx5g_	126	126	41	25	15	15.375	1.025	0.415	0.261	0.479	0.351	1	0	0	0	0	0	f	f.27.1.1	G
d3cx5h_	93	93	55	30	16	26.400	1.196	0.055	0.077	0.001	0.066	1	0	0	0	1	0	f	f.23.13.1	H
d3cx5i_	57	57	41	14	9	5.166	1.783	0.335	0.279	0.589	0.325	1	0	0	0	0	0	f	f.23.14.1	I
d3cy4a_	151	151	26	23	16	9.568	0.667	0.602	0.432	0.518	0.529	0	0	1	0	0	0	b	b.64.1.1	A
d3czza_	101	101	26	13	10	3.380	1.130	0.608	0.592	0.580	0.612	0	0	1	1	0	0	b	b.89.1.1	A
d3d06a_	179	179	27	24	17	11.016	0.659	0.604	0.448	0.508	0.536	0	0	1	0	0	0	b	b.2.5.2	A
d3d36c_	42	42	15	12	9	1.620	0.714	0.613	0.547	0.715	0.597	0	0	1	1	0	0	a	a.2.12.1	C
d3d3ra1	76	76	28	21	14	8.232	0.800	0.114	0.165	0.000	0.135	1	0	0	0	1	0	b	b.40.14.1	A(1-76)
d3db7a1	126	126	26	18	16	7.488	0.765	0.542	0.431	0.706	0.498	0	0	1	0	0	0	d	d.98.2.1	A(20-145)
d3dbya1	121	121	29	15	10	4.350	1.160	0.632	0.599	0.573	0.625	0	0	1	1	0	0	a	a.29.13.1	A(5-125)
d3ddta1	45	45	16	13	10	2.080	0.696	0.612	0.482	0.723	0.563	0	0	1	0	0	0	g	g.43.1.1	A(1-45)
d3dgpb_	63	63	25	12	10	3.000	1.136	0.609	0.478	0.589	0.551	0	0	1	0	0	0	d	d.295.1.0	B
d3dk9a3	115	115	30	18	16	8.640	0.882	0.567	0.384	0.523	0.486	0	0	1	0	0	0	d	d.87.1.1	A(364-478)
d3dkma1	70	70	16	15	11	2.640	0.615	0.648	0.559	0.639	0.609	0	0	1	1	0	0	b	b.34.19.1	A(1273-1342)
d3dnfa_	281	281	41	32	17	22.304	0.837	0.483	0.353	0.406	0.425	0	1	0	0	0	0	c	c.155.1.1	A
d3dnja_	80	80	19	15	13	3.705	0.679	0.607	0.529	0.439	0.582	0	0	1	1	0	0	d	d.45.1.2	A
d3dxra_	69	69	35	16	9	5.040	1.400	0.406	0.308	0.589	0.367	0	1	0	0	0	0	g	g.83.1.0	A
d3e1za_	109	109	27	18	12	5.832	0.900	0.603	0.455	0.519	0.542	0	0	1	0	0	0	b	b.1.26.1	A
d3e4ha_	29	29	12	8	6	0.576	0.857	0.709	0.654	0.867	0.687	0	0	1	1	0	0	g	g.3.3.1	A
d3e9va1	120	120	22	20	15	6.600	0.629	0.600	0.460	0.485	0.537	0	0	1	0	0	0	d	d.370.1.1	A(9-128)
d3ea6a1	84	84	27	16	14	6.048	0.900	0.564	0.380	0.582	0.480	0	0	1	0	0	0	b	b.40.2.0	A(3-86)
d3ea6a2	131	131	27	19	17	8.721	0.750	0.571	0.424	0.521	0.509	0	0	1	0	0	0	d	d.15.6.1	A(87-217)
d3eeqa2	194	194	36	17	16	9.792	1.091	0.518	0.467	0.273	0.502	0	0	1	0	0	0	c	c.152.1.1	A(10-214)
d3eera_	140	140	29	21	19	11.571	0.725	0.420	0.292	0.564	0.365	1	0	0	0	0	0	d	d.227.1.0	A
d3eipa_	84	84	23	15	12	4.140	0.852	0.614	0.510	0.635	0.578	0	0	1	1	0	0	d	d.26.2.1	A
d3eoja_	359	359	40	31	24	29.760	0.727	0.365	0.334	0.063	0.354	0	1	0	0	0	0	b	b.75.1.1	A
d3er9b_	445	445	49	30	22	32.340	0.942	0.467	0.395	0.540	0.444	0	1	0	0	0	0	e	e.69.1.1	B
d3eyea_	153	153	24	19	17	7.752	0.667	0.590	0.492	0.685	0.560	0	0	1	0	0	0	c	c.38.1.0	A
d3f0da_	155	155	26	20	14	7.280	0.765	0.599	0.483	0.566	0.550	0	0	1	0	0	0	d	d.79.5.0	A
d3f0pa2	128	128	24	22	13	6.864	0.686	0.513	0.424	0.708	0.481	0	0	1	0	0	0	d	d.357.1.2	A(81-208)
d3f1la_	245	245	29	24	20	13.920	0.659	0.560	0.460	0.490	0.521	0	0	1	0	0	0	c	c.2.1.0	A
d3f42a1	92	92	40	13	10	5.200	1.739	0.484	0.410	0.519	0.451	0	1	0	0	0	0	d	d.222.1.0	A(1-92)
d3f6ya_	235	235	35	29	20	20.300	0.714	0.496	0.343	0.351	0.424	0	1	0	0	0	0	c	c.23.14.3	A
d3f7la_	151	151	22	20	19	8.360	0.564	0.599	0.457	0.585	0.544	0	0	1	0	0	0	b	b.1.8.1	A
d3faua1	70	70	20	13	11	2.860	0.833	0.602	0.534	0.401	0.570	0	0	1	1	0	0	d	d.68.8.1	A(11-89)
d3fkea_	123	123	26	17	16	7.072	0.788	0.601	0.472	0.713	0.552	0	0	1	0	0	0	d	d.388.1.1	A
d3fmua_	319	319	34	26	22	19.448	0.708	0.585	0.441	0.545	0.522	0	0	1	0	0	0	a	a.93.1.0	A
d3fsoa1	108	108	27	13	11	3.861	1.125	0.598	0.578	0.486	0.596	0	0	1	1	0	0	b	b.1.27.0	A(989-1105)
d3fsta_	286	286	35	24	22	18.480	0.761	0.519	0.400	0.625	0.466	0	0	1	0	0	0	c	c.1.23.1	A
d3ft1a1	97	97	21	17	13	4.641	0.700	0.639	0.527	0.561	0.592	0	0	1	1	0	0	b	b.7.3.0	A(1-97)
d3fx7a1	82	82	37	12	10	4.440	1.682	0.525	0.457	0.357	0.503	0	0	1	0	0	0	a	a.25.5.1	A(5-86)
d3fxka2	68	68	25	14	10	3.500	1.042	0.562	0.447	0.467	0.515	0	0	1	0	0	0	a	a.159.1.0	A(297-368)
d3fyba1	97	97	29	20	15	8.700	0.829	0.402	0.301	0.520	0.360	0	1	0	0	0	0	a	a.293.1.0	A(1-97)
d3fz2a1	128	128	30	18	13	7.020	0.968	0.606	0.476	0.613	0.555	0	0	1	0	0	0	d	d.323.1.1	A(4-134)
d3g21a_	77	77	20	16	10	3.200	0.769	0.608	0.531	0.672	0.583	0	0	1	1	0	0	a	a.28.3.1	A
d3ge3c_	83	83	19	14	13	3.458	0.704	0.596	0.522	0.663	0.564	0	0	1	1	0	0	d	d.15.12.0	C
d3ge3e_	102	102	24	18	13	5.616	0.774	0.541	0.442	0.614	0.506	0	0	1	0	0	0	d	d.137.1.1	E
d3giua_	212	212	25	22	21	11.550	0.581	0.536	0.455	0.661	0.512	0	0	1	0	0	0	c	c.56.4.0	A
d3gj3b_	27	27	10	8	7	0.560	0.667	0.670	0.647	0.816	0.669	0	0	1	1	0	0	g	g.41.11.1	B
d3glaa_	97	97	30	15	11	4.950	1.154	0.612	0.482	0.606	0.559	0	0	1	0	0	0	b	b.15.1.0	A
d3gmxa_	154	154	26	19	14	6.916	0.788	0.565	0.510	0.703	0.547	0	0	1	1	0	0	d	d.98.1.0	A
d3gp6a1	154	154	27	24	19	12.312	0.628	0.481	0.340	0.638	0.422	0	1	0	0	0	0	f	f.4.1.2	A(0-161)
d3h0na_	184	184	36	21	19	14.364	0.900	0.506	0.357	0.598	0.440	0	0	1	0	0	0	d	d.380.1.1	A
d3h1da1	369	369	48	36	23	39.744	0.814	0.492	0.306	0.595	0.407	0	1	0	0	0	0	d	d.148.1.0	A(3993-4366)
d3h43a1	17	17	17	5	4	0.340	1.889	0.838	0.715	0.794	0.783	0	0	1	1	0	0	h	h.1.39.1	A(74-90)
d3h43a2	59	59	15	13	11	2.145	0.625	0.611	0.552	0.575	0.596	0	0	1	1	0	0	b	b.40.17.1	A(91-149)
d3h4ta1	382	382	35	25	23	20.125	0.729	0.502	0.441	0.436	0.476	0	0	1	0	0	0	c	c.87.1.5	A(2-383)
d3h63a_	315	315	30	26	20	15.600	0.652	0.622	0.524	0.613	0.585	0	0	1	1	0	0	d	d.159.1.3	A
d3h7ia1	177	177	33	23	16	12.144	0.846	0.540	0.418	0.643	0.491	0	0	1	0	0	0	c	c.120.1.2	A(4-180)
d3h7ia2	125	125	38	24	17	15.504	0.927	0.148	0.167	0.033	0.157	1	0	0	0	1	0	a	a.60.7.1	A(181-305)
d3h90a1	201	201	42	24	19	19.152	0.977	0.492	0.308	0.601	0.406	0	1	0	0	0	0	f	f.59.1.1	A(8-208)
d3h9va1	51	51	16	13	9	1.872	0.727	0.608	0.469	0.671	0.547	0	0	1	0	0	0	d	d.230.8.1	A(116-167)
d3h9va2	222	222	40	27	21	22.680	0.833	0.438	0.282	0.611	0.369	1	0	0	0	0	0	b	b.184.1.1	A(59-115,168-332)
d3h9va3	56	56	24	11	8	2.112	1.263	0.474	0.448	0.304	0.460	0	1	0	0	0	0	d	d.230.9.1	A(32-58,333-361)
d3hhta_	202	202	43	26	17	19.006	1.000	0.394	0.294	0.458	0.354	1	0	0	0	0	0	d	d.149.1.1	A
d3hhya_	256	256	39	26	18	18.252	0.886	0.489	0.369	0.610	0.444	0	1	0	0	0	0	b	b.3.6.0	A
d3hlxa1	250	250	35	25	22	19.250	0.745	0.571	0.400	0.446	0.494	0	0	1	0	0	0	a	a.132.1.4	A(2-251)
d3hmsa_	91	91	20	17	15	5.100	0.625	0.637	0.492	0.671	0.583	0	0	1	0	0	0	g	g.10.1.1	A
d3hola3	107	107	50	23	12	13.800	1.429	0.361	0.220	0.666	0.302	1	0	0	0	0	0	b	b.181.1.1	A(24-130)
d3hpwa_	101	101	22	21	14	6.468	0.629	0.602	0.445	0.607	0.538	0	0	1	0	0	0	b	b.34.6.1	A
d3i33a1	184	184	33	21	17	11.781	0.868	0.547	0.423	0.533	0.499	0	0	1	0	0	0	c	c.55.1.1	A(6-189)
d3i94a_	243	243	32	24	19	14.592	0.744	0.578	0.466	0.634	0.534	0	0	1	0	0	0	d	d.248.2.1	A
d3iam5_	196	196	40	25	22	22.000	0.851	0.245	0.230	0.025	0.234	1	0	0	0	0	0	d	d.307.1.1	5
d3ieza_	94	94	21	17	12	4.284	0.724	0.591	0.521	0.508	0.561	0	0	1	1	0	0	d	d.332.1.1	A
d3im6a_	175	175	29	22	18	11.484	0.725	0.595	0.421	0.527	0.517	0	0	1	0	0	0	b	b.42.6.2	A
d3imka1	157	157	25	18	17	7.650	0.714	0.591	0.502	0.657	0.557	0	0	1	1	0	0	c	c.129.1.5	A(1-157)
d3ip0a_	158	158	21	21	17	7.497	0.553	0.525	0.498	0.495	0.522	0	0	1	0	0	0	d	d.58.30.1	A
d3ip4c_	92	92	33	28	12	11.088	0.825	0.065	0.133	0.006	0.099	1	0	0	0	1	0	a	a.137.12.1	C
d3ivva1	138	138	26	20	15	7.800	0.743	0.623	0.479	0.505	0.557	0	0	1	0	0	0	b	b.8.1.1	A(28-165)
d3j9tg2	90	90	90	7	5	3.150	7.500	0.686	0.556	0.699	0.632	0	0	1	1	0	1	h	h.1.36.1	G(8-97)
d3j9th_	105	105	93	18	8	13.392	3.577	0.173	0.184	0.034	0.182	1	0	0	0	1	1	h	h.1.37.1	H
d3jb9a5	640	640	72	60	40	172.800	0.720	0.209	0.125	0.157	0.169	1	0	0	0	0	0	d	d.394.1.1	A(47-697)
d3jb9i_	161	161	79	26	17	34.918	1.837	0.039	0.094	0.000	0.070	1	0	0	0	1	0	h	h.1.41.1	i
d3jb9s2	75	75	70	10	7	4.900	4.118	0.461	0.349	0.427	0.409	0	1	0	0	0	1	h	h.1.40.1	S(58-132)
d3jcla3	183	183	39	22	16	13.728	1.026	0.399	0.325	0.511	0.370	0	1	0	0	0	0	e	e.83.1.1	A(285-323,573-716)
d3jqka_	143	143	32	19	14	8.512	0.970	0.506	0.401	0.697	0.464	0	0	1	0	0	0	d	d.58.21.0	A
d3ju4a2	150	150	55	23	17	21.505	1.375	0.228	0.172	0.117	0.199	1	0	0	0	0	0	b	b.108.1.0	A(761-910)
d3jv1a_	182	182	40	20	18	14.400	1.053	0.415	0.326	0.508	0.379	0	1	0	0	0	0	d	d.25.1.0	A
d3k2za2	126	126	25	21	15	7.875	0.694	0.552	0.417	0.630	0.495	0	0	1	0	0	0	b	b.87.1.0	A(72-197)
d3k34a_	258	258	28	23	21	13.524	0.636	0.590	0.493	0.687	0.555	0	0	1	0	0	0	b	b.74.1.1	A
d3k6ia1	98	98	25	15	13	4.875	0.893	0.597	0.482	0.471	0.551	0	0	1	0	0	0	b	b.1.6.0	A(2-99)
d3kdse2	189	189	33	23	19	14.421	0.786	0.479	0.352	0.417	0.425	0	1	0	0	0	0	a	a.269.1.1	E(403-603)
d3kg2a3	140	140	43	23	15	14.835	1.132	0.306	0.224	0.183	0.268	1	0	0	0	0	0	f	f.14.2.1	A(508-632,774-817)
d3ki2a1	194	194	30	24	17	12.240	0.732	0.486	0.399	0.443	0.454	0	1	0	0	0	0	d	d.166.1.0	A(427-628)
d3ku3a1	323	323	71	26	20	36.920	1.543	0.441	0.274	0.478	0.367	1	0	0	0	0	0	b	b.19.1.2	A(10-326)
d3kwda_	166	166	25	20	15	7.500	0.714	0.619	0.525	0.526	0.582	0	0	1	1	0	0	b	b.81.1.0	A
d3kyga1	117	117	27	19	13	6.669	0.844	0.581	0.456	0.562	0.528	0	0	1	0	0	0	b	b.45.2.2	A(21-137)
d3l00a1	69	69	23	15	12	4.140	0.852	0.572	0.432	0.597	0.512	0	0	1	0	0	0	c	c.55.7.0	A(5-91)
d3l00a2	88	88	19	13	11	2.717	0.792	0.640	0.600	0.742	0.626	0	0	1	1	0	0	a	a.4.2.0	A(92-179)
d3l51b1	158	158	32	19	17	10.336	0.889	0.506	0.400	0.594	0.466	0	0	1	0	0	0	d	d.215.1.0	B(595-752)
d3l5oa1	244	244	29	22	19	12.122	0.707	0.541	0.484	0.631	0.528	0	0	1	0	0	0	c	c.67.3.1	A(1-251)
d3l81a_	250	250	48	27	20	25.920	1.021	0.453	0.294	0.585	0.382	1	0	0	0	0	0	b	b.2.7.0	A
d3lasa_	166	166	27	26	20	14.040	0.587	0.261	0.267	0.298	0.275	1	0	0	0	1	0	c	c.53.2.0	A
d3ldqb1	110	110	39	12	10	4.680	1.773	0.607	0.543	0.648	0.585	0	0	1	1	0	0	a	a.7.7.1	B(151-260)
d3llpa1	129	129	24	19	17	7.752	0.667	0.538	0.416	0.551	0.486	0	0	1	0	0	0	b	b.42.5.1	A(7-140)
d3lmna_	132	132	41	25	14	14.350	1.051	0.354	0.258	0.292	0.311	1	0	0	0	0	0	d	d.324.1.1	A
d3lvjc_	77	77	17	15	12	3.060	0.630	0.594	0.555	0.561	0.586	0	0	1	1	0	0	d	d.68.3.3	C
d3lyea_	285	285	37	30	21	23.310	0.725	0.445	0.322	0.654	0.397	0	1	0	0	0	0	c	c.1.12.0	A
d3lzla_	157	157	34	18	14	8.568	1.062	0.615	0.468	0.570	0.553	0	0	1	0	0	0	b	b.1.33.0	A
d3m31a1	352	352	35	30	25	26.250	0.636	0.550	0.395	0.617	0.484	0	0	1	0	0	0	a	a.227.1.1	A(56-424)
d3m4ia_	190	190	34	23	16	12.512	0.872	0.504	0.397	0.522	0.459	0	0	1	0	0	0	e	e.78.1.1	A
d3mhra1	231	231	39	26	18	18.252	0.886	0.487	0.337	0.540	0.414	0	1	0	0	0	0	a	a.118.7.1	A(1-231)
d3mhsb_	91	91	31	17	13	6.851	1.033	0.264	0.319	0.007	0.293	1	0	0	0	1	0	a	a.301.1.1	B
d3mmha_	167	167	25	22	15	8.250	0.676	0.604	0.484	0.600	0.549	0	0	1	0	0	0	d	d.110.2.0	A
d3mwpa2	321	321	33	31	22	22.506	0.623	0.487	0.388	0.248	0.444	0	1	0	0	0	0	a	a.300.1.1	A(7-338)
d3n6wa1	95	95	23	17	11	4.301	0.821	0.585	0.508	0.649	0.563	0	0	1	1	0	0	d	d.392.1.1	A(1-95)
d3ndva_	367	367	36	31	17	18.972	0.750	0.620	0.490	0.635	0.570	0	0	1	0	0	0	d	d.154.1.0	A
d3nfta_	262	262	53	21	14	15.582	1.514	0.572	0.444	0.507	0.518	0	0	1	0	0	0	a	a.250.1.1	A
d3nira_	46	46	15	11	9	1.485	0.750	0.661	0.582	0.422	0.637	0	0	1	1	0	0	g	g.13.1.1	A
d3nkea_	183	183	28	23	16	10.304	0.718	0.561	0.458	0.623	0.519	0	0	1	0	0	0	e	e.79.1.1	A
d3nuhb2	168	168	34	21	14	9.996	0.971	0.527	0.419	0.672	0.481	0	0	1	0	0	0	d	d.385.1.1	B(562-732)
d3nvia_	247	247	43	27	23	26.703	0.860	0.350	0.255	0.197	0.299	1	0	0	0	0	0	a	a.183.1.0	A
d3nvsa_	426	426	35	24	22	18.480	0.761	0.585	0.521	0.361	0.554	0	0	1	1	0	0	d	d.68.2.2	A
d3o4pa_	314	314	30	28	23	19.320	0.588	0.594	0.465	0.395	0.543	0	0	1	0	0	0	b	b.68.6.1	A
d3og2a3	97	97	25	19	17	8.075	0.694	0.522	0.317	0.650	0.427	0	0	1	0	0	0	b	b.149.1.0	A(572-668)
d3omya_	51	51	21	15	14	4.410	0.724	0.408	0.296	0.454	0.364	1	0	0	0	0	0	a	a.55.1.0	A
d3ooia1	231	231	34	26	17	15.028	0.791	0.554	0.415	0.540	0.497	0	0	1	0	0	0	f	f.54.1.2	A(1-231)
d3orsa1	160	160	33	22	15	10.890	0.892	0.489	0.358	0.612	0.436	0	1	0	0	0	0	c	c.23.8.0	A(1-160)
d3osea_	100	100	24	15	13	4.680	0.857	0.610	0.522	0.656	0.578	0	0	1	1	0	0	d	d.129.6.1	A
d3osxa1	186	186	31	22	17	11.594	0.795	0.584	0.430	0.479	0.517	0	0	1	0	0	0	c	c.8.5.1	A(191-376)
d3ov9a_	245	245	46	27	25	31.050	0.885	0.342	0.232	0.382	0.291	1	0	0	0	0	0	a	a.299.1.1	A
d3oxpa1	147	147	20	19	16	6.080	0.571	0.584	0.535	0.700	0.573	0	0	1	1	0	0	d	d.112.1.0	A(1-147)
d3p0ya2	23	23	10	8	7	0.560	0.667	0.658	0.602	0.651	0.630	0	0	1	1	0	0	g	g.3.9.1	A(481-503)
d3p54a1	299	299	70	22	15	23.100	1.892	0.536	0.366	0.602	0.460	0	0	1	0	0	0	f	f.10.1.0	A(1-299)
d3phsa1	120	120	24	17	16	6.528	0.727	0.598	0.470	0.622	0.549	0	0	1	0	0	0	b	b.3.5.1	A(31-150)
d3pkza_	124	124	24	17	15	6.120	0.750	0.576	0.494	0.466	0.544	0	0	1	0	0	0	c	c.53.1.0	A
d3pmea2	193	193	26	21	20	10.920	0.634	0.597	0.489	0.480	0.554	0	0	1	0	0	0	b	b.42.4.0	A(1086-1280)
d3pmsa1	137	137	31	20	12	7.440	0.969	0.636	0.487	0.602	0.571	0	0	1	0	0	0	b	b.121.1.1	A(4-140)
d3ppma_	546	546	37	32	27	31.968	0.627	0.586	0.460	0.690	0.540	0	0	1	0	0	0	c	c.117.1.1	A
d3proc1	80	80	28	15	11	4.620	1.077	0.559	0.421	0.604	0.504	0	0	1	0	0	0	d	d.52.1.1	C(6-85)
d3psma_	47	47	16	12	8	1.536	0.800	0.681	0.574	0.778	0.632	0	0	1	1	0	0	g	g.3.7.5	A
d3pt6a1	50	50	20	14	8	2.240	0.909	0.359	0.401	0.249	0.383	0	1	0	0	1	0	g	g.95.1.1	A(651-700)
d3pzwa1	130	130	24	20	16	7.680	0.667	0.593	0.438	0.645	0.524	0	0	1	0	0	0	b	b.12.1.1	A(6-149)
d3pzwa2	690	690	45	36	31	50.220	0.672	0.554	0.410	0.597	0.495	0	0	1	0	0	0	a	a.119.1.1	A(150-839)
d3q20a_	114	114	36	23	17	14.076	0.900	0.191	0.201	0.083	0.201	1	0	0	0	1	0	a	a.280.1.0	A
d3qm9a_	145	145	23	20	14	6.440	0.676	0.528	0.501	0.255	0.517	0	0	1	1	0	0	a	a.1.1.2	A
d3qpaa_	197	197	25	17	17	7.225	0.735	0.630	0.582	0.665	0.618	0	0	1	1	0	0	c	c.69.1.30	A
d3qq8a2	80	80	22	13	10	2.860	0.957	0.596	0.565	0.517	0.589	0	0	1	1	0	0	d	d.31.1.1	A(107-186)
d3qsvd_	125	125	21	18	16	6.048	0.618	0.590	0.506	0.592	0.553	0	0	1	1	0	0	d	d.164.1.0	D
d3qvea1	128	128	22	18	15	5.940	0.667	0.615	0.498	0.671	0.562	0	0	1	0	0	0	b	b.145.1.0	A(206-342)
d3qzba1	131	131	31	22	17	11.594	0.795	0.573	0.338	0.639	0.462	0	0	1	0	0	0	b	b.1.13.0	A(1-131)
d3qzma1	123	123	25	20	13	6.500	0.758	0.594	0.484	0.406	0.553	0	0	1	0	0	0	b	b.1.28.1	A(62-184)
d3r87a_	132	132	29	19	13	7.163	0.906	0.504	0.444	0.664	0.490	0	0	1	0	0	0	d	d.38.1.0	A
d3r8ja_	180	180	27	25	17	11.475	0.643	0.577	0.437	0.620	0.524	0	0	1	0	0	0	d	d.60.1.0	A
d3rbba_	137	137	42	23	15	14.490	1.105	0.484	0.297	0.678	0.400	1	0	0	0	0	0	d	d.102.1.1	A
d3rf3a1	127	127	31	17	13	6.851	1.033	0.485	0.418	0.580	0.462	0	1	0	0	0	0	a	a.24.9.1	A(2-128)
d3rkoa_	95	95	32	23	8	5.888	1.032	0.410	0.370	0.371	0.400	0	1	0	0	0	0	f	f.73.3.1	A
d3rkoc_	504	504	39	29	24	27.144	0.736	0.580	0.497	0.639	0.556	0	0	1	0	0	0	f	f.72.1.1	C
d3rkog_	100	100	38	18	13	8.892	1.226	0.347	0.276	0.441	0.323	1	0	0	0	0	0	f	f.73.1.1	G
d3rkoj_	168	168	42	27	16	18.144	0.977	0.113	0.183	0.022	0.149	1	0	0	0	1	0	f	f.73.2.1	J
d3rlff1	247	247	53	34	15	27.030	1.082	0.177	0.202	0.033	0.188	1	0	0	0	1	0	e	e.70.1.1	F(10-260)
d3rlff2	243	243	41	28	18	20.664	0.891	0.448	0.324	0.558	0.400	0	1	0	0	0	0	f	f.58.1.1	F(261-503)
d3rq7a1	125	125	34	18	16	9.792	1.000	0.272	0.279	0.251	0.275	1	0	0	0	1	0	d	d.223.1.2	A(373-500)
d3rssa1	211	211	27	22	19	11.286	0.659	0.573	0.472	0.627	0.531	0	0	1	0	0	0	c	c.104.1.1	A(1-211)
d3rvca_	118	118	23	17	14	5.474	0.742	0.597	0.489	0.682	0.556	0	0	1	0	0	0	d	d.299.1.1	A
d3ryce1	135	135	129	21	17	46.053	3.395	0.139	0.085	0.109	0.112	1	0	0	0	0	1	a	a.137.10.1	E(5-145)
d3s2ra_	64	64	22	18	9	3.564	0.815	0.565	0.420	0.714	0.506	0	0	1	0	0	0	g	g.97.1.0	A
d3s4ea1	142	142	26	18	15	7.020	0.788	0.641	0.524	0.679	0.596	0	0	1	1	0	0	c	c.45.1.0	A(65-206)
d3s8gc_	31	31	29	5	4	0.580	3.222	0.777	0.706	0.937	0.761	0	0	1	1	0	1	f	f.23.9.1	C
d3sila_	379	379	29	27	24	18.792	0.569	0.586	0.505	0.551	0.557	0	0	1	1	0	0	b	b.68.1.1	A
d3sjld_	376	376	42	32	24	32.256	0.750	0.515	0.348	0.515	0.445	0	0	1	0	0	0	b	b.69.2.0	D
d3sk7a1	105	105	22	16	12	4.224	0.786	0.623	0.546	0.625	0.591	0	0	1	1	0	0	d	d.228.1.1	A(69-177)
d3sqza1	167	167	34	20	14	9.520	1.000	0.469	0.402	0.521	0.448	0	1	0	0	0	0	c	c.95.1.0	A(1-167)
d3ssaa1	55	55	16	12	10	1.920	0.727	0.624	0.567	0.527	0.599	0	0	1	1	0	0	b	b.49.1.0	A(12-75)
d3sxua_	146	146	24	20	15	7.200	0.686	0.611	0.510	0.581	0.575	0	0	1	1	0	0	c	c.128.1.1	A
d3szva1	355	355	35	29	27	27.405	0.625	0.333	0.338	0.251	0.351	0	1	0	0	1	0	f	f.4.7.2	A(1-384)
d3t0ha_	209	209	27	25	21	14.175	0.587	0.537	0.406	0.314	0.479	0	0	1	0	0	0	d	d.122.1.1	A
d3t2ca_	389	389	47	30	23	32.430	0.887	0.477	0.334	0.549	0.415	0	1	0	0	0	0	d	d.280.1.1	A
d3t3la_	121	121	24	16	16	6.144	0.750	0.634	0.494	0.527	0.568	0	0	1	0	0	0	d	d.82.2.1	A
d3t6eh1	36	36	28	10	6	1.680	1.750	0.649	0.466	0.764	0.571	0	0	1	0	0	0	f	f.23.10.1	H(1-36)
d3t6eh2	222	222	38	26	20	19.760	0.826	0.339	0.286	0.258	0.322	1	0	0	0	0	0	b	b.41.1.1	H(37-258)
d3t6el_	273	273	44	36	25	39.600	0.721	0.249	0.198	0.153	0.231	1	0	0	0	0	0	f	f.26.1.1	L
d3t7la_	74	74	24	13	11	3.432	1.000	0.654	0.508	0.712	0.591	0	0	1	1	0	0	g	g.50.1.0	A
d3tewa1	490	490	50	44	24	52.800	0.735	0.486	0.293	0.405	0.392	1	0	0	0	0	0	f	f.60.1.1	A(226-735)
d3tg0a_	440	440	37	30	26	28.860	0.661	0.541	0.394	0.638	0.480	0	0	1	0	0	0	c	c.76.1.1	A
d3tg2a_	205	205	23	22	20	10.120	0.548	0.595	0.507	0.691	0.568	0	0	1	1	0	0	c	c.33.1.0	A
d3tg7a1	579	579	75	44	35	115.500	0.949	0.115	0.128	0.006	0.121	1	0	0	0	1	0	b	b.121.2.2	A(7-636)
d3tkka1	299	299	33	28	21	19.404	0.673	0.576	0.415	0.555	0.506	0	0	1	0	0	0	b	b.23.3.0	A(1-299)
d3tvji_	35	35	15	10	8	1.200	0.833	0.496	0.470	0.442	0.494	0	1	0	0	0	0	g	g.4.1.1	I
d3u1la1	119	119	27	20	14	7.560	0.794	0.474	0.392	0.596	0.445	0	1	0	0	0	0	g	g.66.1.2	A(3-121)
d3u1ua_	131	131	24	21	14	7.056	0.686	0.598	0.480	0.669	0.553	0	0	1	0	0	0	b	b.34.21.1	A
d3u3ha_	386	386	43	30	25	32.250	0.782	0.427	0.322	0.560	0.386	0	1	0	0	0	0	c	c.1.15.3	A
d3u9wa1	206	206	30	21	19	11.970	0.750	0.596	0.459	0.597	0.535	0	0	1	0	0	0	b	b.98.1.1	A(1003-1208)
d3ui4a1	96	96	18	16	13	3.744	0.621	0.638	0.570	0.752	0.621	0	0	1	1	0	0	d	d.26.1.1	A(36-131)
d3ulja_	87	87	22	15	14	4.620	0.759	0.657	0.481	0.524	0.572	0	0	1	0	0	0	b	b.40.4.0	A
d3umha_	180	180	57	16	13	11.856	1.966	0.437	0.375	0.644	0.421	0	1	0	0	0	0	a	a.47.4.1	A
d3uqza1	71	71	22	16	11	3.872	0.815	0.635	0.466	0.739	0.553	0	0	1	0	0	0	a	a.60.17.1	A(1-71)
d3v5wg_	57	57	42	20	7	5.880	1.556	0.115	0.179	0.001	0.147	1	0	0	0	1	0	a	a.137.3.1	G
d3v6ta_	491	491	40	35	34	47.600	0.580	0.239	0.238	0.036	0.235	1	0	0	0	0	0	a	a.298.1.1	A
d3v7ba_	147	147	22	20	15	6.600	0.629	0.597	0.527	0.700	0.577	0	0	1	1	0	0	d	d.107.1.4	A
d3vb9a_	460	460	47	38	22	39.292	0.783	0.529	0.355	0.653	0.451	0	0	1	0	0	0	e	e.65.1.1	A
d3vdpa_	197	197	37	27	21	20.979	0.771	0.235	0.224	0.211	0.235	1	0	0	0	0	0	e	e.49.1.1	A
d3vhva1	253	253	34	26	23	20.332	0.694	0.555	0.377	0.570	0.473	0	0	1	0	0	0	a	a.123.1.1	A(727-984)
d3vrna1	117	117	30	14	13	5.460	1.111	0.587	0.486	0.599	0.544	0	0	1	0	0	0	a	a.48.1.0	A(12-147)
d3vxva_	65	65	38	20	11	8.360	1.226	0.281	0.214	0.463	0.262	1	0	0	0	0	0	d	d.10.1.0	A
d3vypa2	157	157	32	23	16	11.776	0.821	0.488	0.343	0.592	0.428	0	1	0	0	0	0	b	b.160.1.1	A(252-408)
d3w07a_	215	215	25	23	18	10.350	0.610	0.565	0.493	0.506	0.540	0	0	1	0	0	0	c	c.1.2.3	A
d3w2wa2	78	78	17	15	13	3.315	0.607	0.586	0.523	0.533	0.568	0	0	1	1	0	0	a	a.24.30.1	A(504-592)
d3w5ha1	125	125	29	19	16	8.816	0.829	0.472	0.361	0.554	0.421	0	1	0	0	0	0	b	b.43.4.2	A(1001-1125)
d3w5ha2	147	147	29	20	17	9.860	0.784	0.585	0.423	0.704	0.515	0	0	1	0	0	0	c	c.25.1.1	A(1126-1272)
d3wcqa_	97	97	18	16	13	3.744	0.621	0.583	0.553	0.523	0.581	0	0	1	1	0	0	d	d.15.4.1	A
d3wdna_	125	125	24	21	13	6.552	0.706	0.607	0.489	0.647	0.563	0	0	1	0	0	0	b	b.84.1.0	A
d3weoa4	127	127	29	21	15	9.135	0.806	0.531	0.383	0.601	0.471	0	0	1	0	0	0	b	b.150.1.1	A(757-909)
d3wlia2	214	214	30	23	19	13.110	0.714	0.578	0.426	0.644	0.516	0	0	1	0	0	0	c	c.23.11.0	A(389-602)
d3wtsb_	130	130	30	18	15	8.100	0.909	0.572	0.441	0.550	0.520	0	0	1	0	0	0	b	b.54.1.1	B
d3x0ia_	159	159	31	20	18	11.160	0.816	0.502	0.370	0.404	0.439	0	0	1	0	0	0	d	d.113.1.1	A
d3x34a_	87	87	18	17	14	4.284	0.581	0.577	0.486	0.663	0.548	0	0	1	0	0	0	d	d.120.1.1	A
d3ze3a_	116	116	32	25	15	12.000	0.800	0.374	0.258	0.662	0.328	1	0	0	0	0	0	f	f.62.1.1	A
d3zhoa_	194	194	27	23	15	9.315	0.711	0.607	0.494	0.677	0.567	0	0	1	0	0	0	c	c.23.5.8	A
d3ziwa1	162	162	36	18	16	10.368	1.059	0.530	0.389	0.655	0.471	0	0	1	0	0	0	f	f.8.1.3	A(38-199)
d3zqua_	207	207	33	22	21	15.246	0.767	0.491	0.362	0.593	0.441	0	1	0	0	0	0	c	c.34.1.0	A
d3zqxa1	145	145	24	17	15	6.120	0.750	0.629	0.558	0.561	0.607	0	0	1	1	0	0	b	b.2.2.0	A(1-145)
d3zzsa_	65	65	21	14	9	2.646	0.913	0.554	0.484	0.645	0.525	0	0	1	0	0	0	b	b.82.5.1	A
d4a02a_	166	166	21	19	16	6.384	0.600	0.610	0.567	0.665	0.601	0	0	1	1	0	0	b	b.1.18.0	A
d4a2va_	122	122	26	19	16	7.904	0.743	0.599	0.440	0.665	0.528	0	0	1	0	0	0	b	b.88.2.0	A
d4a5sa1	469	469	39	37	30	43.290	0.582	0.284	0.293	0.115	0.294	1	0	0	0	1	0	b	b.70.3.1	A(40-508)
d4a8ta1	147	147	33	18	17	10.098	0.943	0.448	0.375	0.163	0.411	0	1	0	0	0	0	c	c.78.1.0	A(1-148)
d4a8ua_	159	159	28	21	17	9.996	0.737	0.523	0.433	0.209	0.480	0	0	1	0	0	0	d	d.129.3.1	A
d4adya2	304	304	58	27	19	29.754	1.261	0.379	0.279	0.560	0.337	1	0	0	0	0	0	a	a.118.28.1	A(4-308)
d4adya3	100	100	25	21	13	6.825	0.735	0.466	0.369	0.661	0.434	0	1	0	0	0	0	b	b.3.8.1	A(754-925)
d4af1a1	138	138	29	19	14	7.714	0.879	0.610	0.465	0.705	0.551	0	0	1	0	0	0	d	d.91.1.0	A(7-144)
d4affa1	106	106	34	18	13	7.956	1.097	0.442	0.320	0.602	0.388	0	1	0	0	0	0	d	d.58.5.1	A(1-112)
d4agha_	80	80	26	19	12	5.928	0.839	0.404	0.325	0.492	0.374	0	1	0	0	0	0	d	d.18.1.0	A
d4al0a_	146	146	39	22	17	14.586	1.000	0.477	0.306	0.680	0.404	0	1	0	0	0	0	f	f.56.1.0	A
d4am1a1	94	94	20	18	12	4.320	0.667	0.638	0.510	0.573	0.585	0	0	1	1	0	0	a	a.83.1.0	A(2-95)
d4am1a2	250	250	31	26	20	16.120	0.674	0.502	0.409	0.535	0.465	0	0	1	0	0	0	d	d.128.1.2	A(96-356)
d4an8a_	468	468	44	32	25	35.200	0.772	0.430	0.355	0.590	0.407	0	1	0	0	0	0	e	e.81.1.1	A
d4atma_	221	221	70	16	11	12.320	2.593	0.568	0.459	0.645	0.525	0	0	1	0	0	1	a	a.238.1.0	A
d4au1a_	208	208	34	24	19	15.504	0.791	0.415	0.334	0.481	0.388	0	1	0	0	0	0	c	c.23.17.1	A
d4axoa_	126	126	27	17	15	6.885	0.844	0.527	0.427	0.451	0.479	0	0	1	0	0	0	b	b.82.1.0	A
d4ay0a1	104	104	26	17	13	5.746	0.867	0.513	0.413	0.589	0.472	0	0	1	0	0	0	b	b.1.11.0	A(13-130)
d4ay0a2	84	84	21	13	10	2.730	0.913	0.615	0.586	0.530	0.604	0	0	1	1	0	0	b	b.7.2.0	A(131-217)
d4b0ha_	130	130	34	23	19	14.858	0.810	0.368	0.253	0.564	0.320	1	0	0	0	0	0	b	b.85.4.0	A
d4b4ua1	121	121	31	25	14	10.850	0.795	0.296	0.275	0.103	0.289	1	0	0	0	0	0	c	c.58.1.0	A(1-121)
d4bcda1	430	430	42	34	27	38.556	0.689	0.216	0.273	0.014	0.245	1	0	0	0	1	0	b	b.69.7.1	A(1-430)
d4bcta_	201	201	27	24	17	11.016	0.659	0.600	0.471	0.692	0.553	0	0	1	0	0	0	b	b.25.1.1	A
d4bt7a_	236	236	26	22	18	10.296	0.650	0.589	0.542	0.595	0.579	0	0	1	1	0	0	d	d.290.1.0	A
d4c3hd_	59	59	23	19	14	6.118	0.697	0.268	0.222	0.127	0.242	1	0	0	0	0	0	g	g.98.1.1	D
d4cdpa1	331	331	35	25	23	20.125	0.729	0.504	0.429	0.535	0.481	0	0	1	0	0	0	e	e.62.1.1	A(1-337)
d4cr2x_	127	127	23	18	15	6.210	0.697	0.557	0.490	0.512	0.531	0	0	1	0	0	0	b	b.55.3.1	X
d4cvka1	99	99	21	17	14	4.998	0.677	0.543	0.453	0.642	0.511	0	0	1	0	0	0	c	c.98.1.0	A(1-100)
d4cz5a_	29	29	23	11	5	1.265	1.438	0.356	0.387	0.423	0.373	0	1	0	0	1	0	a	a.53.1.0	A
d4d6ga2	165	165	39	19	17	12.597	1.083	0.457	0.353	0.548	0.414	0	1	0	0	0	0	b	b.24.2.0	A(839-1003)
d4dnda_	95	95	32	13	11	4.576	1.333	0.598	0.501	0.550	0.556	0	0	1	1	0	0	a	a.47.2.1	A
d4doia_	221	221	30	24	20	14.400	0.682	0.582	0.418	0.514	0.507	0	0	1	0	0	0	d	d.36.1.0	A
d4dqqa2	408	408	37	32	29	34.336	0.607	0.328	0.318	0.072	0.321	0	1	0	0	0	0	e	e.8.1.1	A(469-876)
d4drib1	88	88	23	15	12	4.140	0.852	0.596	0.513	0.585	0.566	0	0	1	1	0	0	a	a.24.7.1	B(2025-2112)
d4duia1	157	157	32	16	12	6.144	1.143	0.614	0.549	0.700	0.594	0	0	1	1	0	0	d	d.211.1.1	A(13-169)
d4dwra1	480	480	34	28	26	24.752	0.630	0.577	0.498	0.618	0.548	0	0	1	0	0	0	d	d.261.1.1	A(2-481)
d4dxha1	198	198	26	23	20	11.960	0.605	0.539	0.423	0.570	0.495	0	0	1	0	0	0	b	b.35.1.2	A(1-163,340-374)
d4dyna_	437	437	49	37	26	47.138	0.778	0.437	0.282	0.372	0.370	1	0	0	0	0	0	e	e.75.1.1	A
d4e29a_	233	233	72	20	15	21.600	2.057	0.428	0.293	0.410	0.367	1	0	0	0	0	1	d	d.58.60.1	A
d4e3xa1	541	541	54	36	27	52.488	0.857	0.441	0.303	0.413	0.382	0	1	0	0	0	0	c	c.82.1.0	A(22-562)
d4e3ya_	240	240	29	21	19	11.571	0.725	0.613	0.521	0.659	0.583	0	0	1	1	0	0	d	d.4.1.2	A
d4eada1	69	69	20	15	12	3.600	0.741	0.511	0.435	0.515	0.488	0	0	1	0	0	0	a	a.46.2.1	A(2-70)
d4eada2	265	265	29	24	21	14.616	0.644	0.564	0.456	0.548	0.524	0	0	1	0	0	0	c	c.27.1.1	A(71-335)
d4eada3	105	105	31	26	13	10.478	0.795	0.226	0.242	0.051	0.241	1	0	0	0	1	0	d	d.41.3.1	A(336-440)
d4egua1	116	116	25	18	17	7.650	0.714	0.544	0.409	0.705	0.494	0	0	1	0	0	0	d	d.13.1.0	A(4-119)
d4elya_	135	135	31	19	15	8.835	0.912	0.562	0.418	0.540	0.504	0	0	1	0	0	0	e	e.11.1.1	A
d4emta1	174	174	31	24	17	12.648	0.756	0.576	0.411	0.666	0.508	0	0	1	0	0	0	d	d.387.1.1	A(155-337)
d4enea_	444	444	44	35	23	35.420	0.759	0.523	0.353	0.621	0.450	0	0	1	0	0	0	f	f.20.1.1	A
d4eo7a1	140	140	22	20	18	7.920	0.579	0.577	0.476	0.601	0.540	0	0	1	0	0	0	c	c.23.2.0	A(157-296)
d4eqpa_	129	129	23	19	16	6.992	0.657	0.606	0.484	0.512	0.557	0	0	1	0	0	0	b	b.40.1.1	A
d4etna1	147	147	21	20	17	7.140	0.568	0.618	0.516	0.650	0.586	0	0	1	1	0	0	c	c.44.1.0	A(1-147)
d4ez8a_	287	287	28	26	21	15.288	0.596	0.558	0.476	0.475	0.527	0	0	1	0	0	0	d	d.117.1.1	A
d4f01a1	118	118	28	19	13	6.916	0.875	0.585	0.407	0.641	0.499	0	0	1	0	0	0	b	b.130.1.1	A(389-506)
d4f01a2	96	96	42	13	10	5.460	1.826	0.457	0.363	0.795	0.422	0	1	0	0	0	0	a	a.8.4.1	A(507-602)
d4f19a1	370	370	36	24	21	18.144	0.800	0.608	0.496	0.586	0.562	0	0	1	0	0	0	c	c.94.1.1	A(1001-1370)
d4fhrb1	206	206	42	19	18	14.364	1.135	0.482	0.383	0.609	0.444	0	1	0	0	0	0	a	a.118.14.1	B(115-327)
d4fkda1	50	50	16	11	10	1.760	0.762	0.655	0.582	0.670	0.637	0	0	1	1	0	0	g	g.49.1.1	A(10-59)
d4fvya_	407	407	42	30	24	30.240	0.778	0.466	0.375	0.241	0.426	0	1	0	0	0	0	d	d.174.1.1	A
d4fywb1	91	91	20	17	14	4.760	0.645	0.550	0.463	0.655	0.521	0	0	1	0	0	0	d	d.58.2.1	B(10-100)
d4fywb2	53	53	19	12	10	2.280	0.864	0.620	0.542	0.675	0.593	0	0	1	1	0	0	g	g.41.7.1	B(101-153)
d4g0xa1	146	146	26	20	16	8.320	0.722	0.566	0.441	0.666	0.517	0	0	1	0	0	0	c	c.44.3.0	A(2-147)
d4g26a2	89	89	25	17	12	5.100	0.862	0.591	0.429	0.532	0.513	0	0	1	0	0	0	g	g.103.1.1	A(300-352,535-570)
d4g3na_	302	302	29	28	21	17.052	0.592	0.475	0.433	0.213	0.458	0	1	0	0	0	0	b	b.68.10.0	A
d4g78a1	144	144	38	16	15	9.120	1.226	0.561	0.427	0.536	0.506	0	0	1	0	0	0	a	a.24.10.0	A(1-144)
d4gh0a_	200	200	31	24	16	11.904	0.775	0.501	0.451	0.554	0.493	0	0	1	0	0	0	a	a.224.1.1	A
d4gmua1	257	257	34	33	23	25.806	0.607	0.506	0.316	0.650	0.426	0	0	1	0	0	0	c	c.109.1.1	A(3-259)
d4gmua2	353	353	38	26	24	23.712	0.760	0.526	0.407	0.612	0.478	0	0	1	0	0	0	c	c.91.1.1	A(260-622)
d4gq4a1	209	209	31	23	19	13.547	0.738	0.511	0.400	0.611	0.471	0	0	1	0	0	0	d	d.389.1.1	A(2-230)
d4gq4a2	260	260	40	27	24	25.920	0.784	0.531	0.312	0.593	0.424	0	0	1	0	0	0	a	a.118.8.1	A(231-588)
d4gt9a1	213	213	42	27	14	15.876	1.024	0.598	0.408	0.639	0.512	0	0	1	0	0	0	d	d.207.1.1	A(1-216)
d4gv2a1	141	141	40	19	16	12.160	1.143	0.541	0.346	0.536	0.451	0	0	1	0	0	0	a	a.41.1.0	A(178-321)
d4gvqa_	315	315	32	30	20	19.200	0.640	0.587	0.441	0.656	0.524	0	0	1	0	0	0	d	d.147.1.0	A
d4gwba_	164	164	24	20	19	9.120	0.615	0.610	0.485	0.490	0.559	0	0	1	0	0	0	d	d.58.28.1	A
d4h27a_	318	318	31	26	21	16.926	0.660	0.558	0.466	0.603	0.523	0	0	1	0	0	0	c	c.79.1.1	A
d4h8ea_	235	235	36	26	21	19.656	0.766	0.537	0.368	0.594	0.467	0	0	1	0	0	0	c	c.101.1.1	A
d4hdra_	335	335	38	25	22	20.900	0.809	0.585	0.434	0.624	0.524	0	0	1	0	0	0	c	c.39.1.0	A
d4heia_	92	92	26	14	11	4.004	1.040	0.577	0.540	0.416	0.572	0	0	1	1	0	0	d	d.204.1.0	A
d4hlsa_	97	97	24	18	12	5.184	0.800	0.638	0.497	0.677	0.577	0	0	1	0	0	0	d	d.6.1.1	A
d4hs1a1	78	78	24	14	12	4.032	0.923	0.528	0.439	0.651	0.505	0	0	1	0	0	0	c	c.47.1.1	A(2-79)
d4htga2	80	80	25	14	13	4.550	0.926	0.607	0.442	0.609	0.536	0	0	1	0	0	0	d	d.50.2.0	A(232-311)
d4hwsa2	110	110	20	16	13	4.160	0.690	0.607	0.571	0.613	0.603	0	0	1	1	0	0	c	c.51.1.0	A(533-642)
d4i0ua2	64	64	37	14	8	4.144	1.682	0.588	0.425	0.586	0.518	0	0	1	0	0	0	f	f.17.3.1	A(286-349)
d4i6ya1	264	264	35	24	20	16.800	0.795	0.548	0.406	0.666	0.491	0	0	1	0	0	0	d	d.179.1.1	A(3-110,221-376)
d4i6ya2	110	110	23	17	12	4.692	0.793	0.601	0.511	0.559	0.561	0	0	1	1	0	0	d	d.58.20.1	A(111-220)
d4i71a1	322	322	28	25	21	14.700	0.609	0.607	0.537	0.638	0.586	0	0	1	1	0	0	c	c.70.1.1	A(1-327)
d4i8ha_	223	223	24	23	17	9.384	0.600	0.609	0.539	0.670	0.587	0	0	1	1	0	0	b	b.47.1.2	A
d4i9oa_	78	78	26	15	10	3.900	1.040	0.572	0.456	0.570	0.521	0	0	1	0	0	0	a	a.12.1.1	A
d4iaua_	161	161	28	17	13	6.188	0.933	0.627	0.569	0.534	0.608	0	0	1	1	0	0	b	b.11.1.0	A
d4icgc_	67	67	18	13	12	2.808	0.720	0.569	0.481	0.754	0.535	0	0	1	0	0	0	a	a.23.5.1	C
d4ikva_	492	492	36	34	30	36.720	0.562	0.480	0.368	0.275	0.432	0	1	0	0	0	0	f	f.38.1.3	A
d4inwa_	140	140	21	19	16	6.384	0.600	0.540	0.526	0.197	0.536	0	0	1	1	0	0	a	a.39.2.1	A
d4iuja_	408	408	42	29	28	34.104	0.737	0.474	0.334	0.640	0.414	0	1	0	0	0	0	e	e.77.1.1	A
d4ixna2	95	95	24	14	12	4.032	0.923	0.592	0.515	0.655	0.563	0	0	1	1	0	0	d	d.237.1.1	A(224-318)
d4iyaa_	283	283	49	22	17	18.326	1.256	0.621	0.452	0.646	0.552	0	0	1	0	0	0	f	f.6.1.0	A
d4j42a_	80	80	40	13	11	5.720	1.667	0.307	0.301	0.250	0.313	0	1	0	0	0	0	a	a.25.3.0	A
d4j9yb1	84	84	42	16	11	7.392	1.556	0.429	0.312	0.388	0.380	0	1	0	0	0	0	f	f.15.1.1	B(396-487)
d4jbua1	273	273	52	28	17	24.752	1.156	0.484	0.333	0.581	0.423	0	1	0	0	0	0	e	e.46.1.1	A(28-319)
d4jcca_	284	284	36	23	17	14.076	0.900	0.549	0.484	0.284	0.520	0	0	1	0	0	0	c	c.92.2.0	A
d4jera_	181	181	28	22	17	10.472	0.718	0.577	0.440	0.504	0.517	0	0	1	0	0	0	d	d.35.1.0	A
d4jk8a_	220	220	32	30	17	16.320	0.681	0.442	0.360	0.599	0.415	0	1	0	0	0	0	c	c.55.3.14	A
d4jw0a_	95	95	27	16	12	5.184	0.964	0.586	0.445	0.622	0.527	0	0	1	0	0	0	b	b.40.15.1	A
d4jxqa_	185	185	31	23	18	12.834	0.756	0.503	0.387	0.585	0.459	0	0	1	0	0	0	d	d.108.1.0	A
d4k8ga1	111	111	23	21	17	8.211	0.605	0.480	0.367	0.726	0.439	0	1	0	0	0	0	d	d.54.1.0	A(1-111)
d4k8ga2	274	274	33	25	22	18.150	0.702	0.465	0.394	0.418	0.444	0	1	0	0	0	0	c	c.1.11.0	A(112-402)
d4kefa1	132	132	26	19	16	7.904	0.743	0.603	0.447	0.626	0.537	0	0	1	0	0	0	d	d.109.1.2	A(2-139)
d4kfna1	147	147	31	19	18	10.602	0.838	0.499	0.377	0.657	0.443	0	1	0	0	0	0	d	d.41.2.0	A(8-163)
d4kfna2	326	326	47	25	25	29.375	0.940	0.365	0.298	0.381	0.346	1	0	0	0	0	0	c	c.1.17.2	A(164-489)
d4krea1	373	373	52	33	24	41.184	0.912	0.335	0.265	0.197	0.303	1	0	0	0	0	0	b	b.34.14.0	A(18-410)
d4kuia_	202	202	37	23	18	15.318	0.902	0.552	0.388	0.654	0.480	0	0	1	0	0	0	b	b.34.12.0	A
d4l9pa_	335	335	52	29	23	34.684	1.000	0.207	0.245	0.048	0.225	1	0	0	0	1	0	a	a.118.6.0	A
d4ld8a1	150	150	28	18	17	8.568	0.800	0.566	0.453	0.547	0.520	0	0	1	0	0	0	b	b.31.1.1	A(44-193)
d4lrsa2	52	52	17	11	9	1.683	0.850	0.609	0.576	0.556	0.604	0	0	1	1	0	0	a	a.5.7.0	A(295-346)
d4lwua_	85	85	21	16	14	4.704	0.700	0.508	0.454	0.357	0.493	0	0	1	0	0	0	a	a.42.1.1	A
d4maka_	73	73	22	13	13	3.718	0.846	0.604	0.479	0.568	0.556	0	0	1	0	0	0	d	d.58.58.1	A
d4mf5a2	131	131	30	23	14	9.660	0.811	0.496	0.360	0.631	0.441	0	1	0	0	0	0	a	a.45.1.0	A(104-234)
d4n2ka2	164	164	32	21	19	12.768	0.800	0.561	0.360	0.604	0.468	0	0	1	0	0	0	b	b.2.9.0	A(116-294)
d4n7fa1	33	33	16	12	7	1.344	0.842	0.660	0.519	0.831	0.597	0	0	1	1	0	0	b	b.72.1.0	A(422-454)
d4n7ta2	119	119	22	15	14	4.620	0.759	0.600	0.583	0.673	0.601	0	0	1	1	0	0	d	d.327.1.1	A(108-226)
d4n9sa1	136	136	40	16	12	7.680	1.429	0.614	0.496	0.554	0.566	0	0	1	0	0	0	d	d.96.1.4	A(1-136)
d4npda_	58	58	24	12	9	2.592	1.143	0.633	0.520	0.612	0.585	0	0	1	1	0	0	a	a.8.1.1	A
d4o5ja_	370	370	62	33	19	38.874	1.192	0.370	0.267	0.551	0.329	1	0	0	0	0	0	f	f.70.1.1	A
d4ogqf_	32	32	31	6	4	0.744	3.100	0.830	0.673	0.825	0.760	0	0	1	1	0	1	f	f.23.25.1	F
d4ogqh_	29	29	27	7	4	0.756	2.455	0.791	0.646	0.912	0.730	0	0	1	1	0	1	f	f.23.27.1	H
d4oo8a3	649	649	65	38	32	79.040	0.929	0.277	0.230	0.164	0.257	1	0	0	0	0	0	d	d.393.1.1	A(59-713)
d4oo8a4	258	258	49	26	21	26.754	1.043	0.313	0.244	0.456	0.290	1	0	0	0	0	0	e	e.80.1.1	A(1103-1366)
d4ooxa1	306	306	39	25	22	21.450	0.830	0.576	0.406	0.643	0.504	0	0	1	0	0	0	b	b.121.4.0	A(225-530)
d4oq9a_	144	144	40	24	14	13.440	1.053	0.327	0.255	0.510	0.299	1	0	0	0	0	0	b	b.121.7.1	A
d4p1ma_	106	106	67	22	10	14.740	2.094	0.261	0.193	0.219	0.232	1	0	0	0	0	1	d	d.244.1.0	A
d4p3aa1	68	68	19	16	8	2.432	0.792	0.625	0.552	0.471	0.598	0	0	1	1	0	0	a	a.50.1.1	A(679-746)
d4p79a1	177	177	43	19	17	13.889	1.194	0.571	0.359	0.655	0.474	0	0	1	0	0	0	f	f.63.1.1	A(2-186)
d4pqda_	105	105	31	23	15	10.695	0.816	0.455	0.278	0.581	0.370	1	0	0	0	0	0	d	d.170.2.1	A
d4ps6a1	129	129	24	19	15	6.840	0.706	0.598	0.473	0.686	0.550	0	0	1	0	0	0	d	d.233.1.1	A(25-153)
d4psya_	159	159	28	21	16	9.408	0.757	0.562	0.461	0.588	0.529	0	0	1	0	0	0	c	c.71.1.1	A
d4pv1e_	28	28	26	5	4	0.520	2.889	0.858	0.747	0.868	0.814	0	0	1	1	0	1	f	f.23.24.1	E
d4pv1g_	37	37	37	9	7	2.331	2.312	0.447	0.336	0.568	0.403	0	1	0	0	0	1	f	f.23.26.1	G
d4qa8a_	210	210	31	24	16	11.904	0.775	0.563	0.431	0.370	0.500	0	0	1	0	0	0	b	b.125.1.0	A
d4qb0a_	95	95	26	15	13	5.070	0.929	0.637	0.475	0.584	0.560	0	0	1	0	0	0	d	d.399.1.1	A
d4qi3a1	207	207	25	21	18	9.450	0.641	0.611	0.511	0.463	0.568	0	0	1	1	0	0	b	b.1.9.0	A(2-208)
d4qmea3	101	101	31	15	11	5.115	1.192	0.595	0.474	0.412	0.540	0	0	1	0	0	0	b	b.1.30.1	A(439-539)
d4qqwa4	122	122	26	24	15	9.360	0.667	0.535	0.363	0.596	0.456	0	0	1	0	0	0	d	d.401.1.1	A(823-944)
d4r5ra_	68	68	27	14	12	4.536	1.038	0.414	0.325	0.451	0.376	0	1	0	0	0	0	g	g.20.1.1	A
d4rd4a2	114	114	27	24	11	7.128	0.771	0.566	0.392	0.520	0.481	0	0	1	0	0	0	b	b.43.3.0	A(207-320)
d4rd4a3	95	95	27	17	12	5.508	0.931	0.570	0.448	0.507	0.518	0	0	1	0	0	0	b	b.44.1.0	A(321-415)
d4rgda_	70	70	16	14	12	2.688	0.615	0.602	0.544	0.553	0.580	0	0	1	1	0	0	a	a.64.2.1	A
d4rj2a_	237	237	26	24	20	12.480	0.591	0.601	0.469	0.567	0.546	0	0	1	0	0	0	c	c.56.2.1	A
d4rwua_	81	81	21	19	11	4.389	0.700	0.600	0.465	0.707	0.548	0	0	1	0	0	0	a	a.2.3.0	A
d4rz9a_	179	179	27	21	19	10.773	0.675	0.601	0.465	0.648	0.543	0	0	1	0	0	0	a	a.118.30.1	A
d4sgbi_	51	51	17	13	8	1.768	0.810	0.645	0.528	0.799	0.596	0	0	1	1	0	0	g	g.69.1.1	I
d4tkca_	118	118	20	19	12	4.560	0.645	0.633	0.569	0.585	0.611	0	0	1	1	0	0	b	b.78.1.0	A
d4u12a_	80	80	26	19	10	4.940	0.897	0.387	0.371	0.128	0.381	0	1	0	0	0	0	a	a.292.1.1	A
d4u60a_	271	271	41	27	19	21.033	0.891	0.555	0.363	0.618	0.464	0	0	1	0	0	0	b	b.121.6.1	A
d4u9hl_	533	533	40	31	26	32.240	0.702	0.583	0.456	0.554	0.536	0	0	1	0	0	0	e	e.18.1.1	L
d4u9hs_	265	265	38	25	18	17.100	0.884	0.546	0.415	0.617	0.495	0	0	1	0	0	0	e	e.19.1.1	S
d4ue8a1	159	159	24	20	18	8.640	0.632	0.603	0.482	0.683	0.560	0	0	1	0	0	0	d	d.86.1.0	A(69-234)
d4uhta_	102	102	22	17	14	5.236	0.710	0.603	0.498	0.512	0.562	0	0	1	0	0	0	a	a.4.6.0	A
d4uw2a5	68	68	23	16	13	4.784	0.793	0.493	0.337	0.662	0.425	0	1	0	0	0	0	d	d.402.1.1	A(425-497)
d4uyba3	126	126	30	21	13	8.190	0.882	0.552	0.396	0.630	0.487	0	0	1	0	0	0	b	b.132.1.0	A(275-400)
d4w4ka_	82	82	44	11	7	3.388	2.444	0.617	0.518	0.400	0.577	0	0	1	1	0	1	a	a.25.4.1	A
d4w64a1	167	167	36	28	21	21.168	0.735	0.431	0.254	0.597	0.354	1	0	0	0	0	0	b	b.157.1.0	A(1-167)
d4wd8a_	268	268	60	19	18	20.520	1.622	0.521	0.372	0.629	0.456	0	0	1	0	0	0	f	f.67.1.1	A
d4wiqa2	125	125	24	17	16	6.528	0.727	0.570	0.457	0.642	0.524	0	0	1	0	0	0	d	d.272.1.1	A(179-303)
d4wisa1	452	452	48	36	31	53.568	0.716	0.391	0.260	0.301	0.326	1	0	0	0	0	0	f	f.68.1.1	A(151-628)
d4wisa2	202	202	86	27	19	44.118	1.870	0.152	0.129	0.206	0.149	1	0	0	0	0	0	d	d.58.64.1	A(19-150,629-719)
d4wjka_	452	452	44	30	26	34.320	0.786	0.539	0.374	0.292	0.464	0	0	1	0	0	0	b	b.69.8.0	A
d4wpka1	227	227	28	23	17	10.948	0.700	0.589	0.507	0.608	0.559	0	0	1	1	0	0	c	c.18.1.0	A(1-227)
d4wsbc6	247	247	42	32	22	29.568	0.778	0.190	0.206	0.159	0.206	1	0	0	0	1	0	e	e.82.1.1	C(1-247)
d4wwxb3	167	167	29	18	17	8.874	0.829	0.569	0.472	0.651	0.530	0	0	1	0	0	0	f	f.66.1.1	B(791-957)
d4x9xa_	268	268	31	26	17	13.702	0.721	0.574	0.488	0.642	0.542	0	0	1	0	0	0	c	c.119.1.0	A
d4xb6b_	194	194	27	21	18	10.206	0.692	0.530	0.466	0.522	0.516	0	0	1	0	0	0	c	c.67.2.1	B
d4xdxa_	70	70	21	15	13	4.095	0.750	0.550	0.418	0.510	0.496	0	0	1	0	0	0	d	d.9.1.1	A
d4xfma_	400	400	51	25	24	30.600	1.041	0.420	0.334	0.488	0.388	0	1	0	0	0	0	c	c.146.1.0	A
d4xgab1	91	91	24	19	12	5.472	0.774	0.600	0.445	0.524	0.526	0	0	1	0	0	0	d	d.391.1.0	B(175-265)
d4xmra1	241	241	45	22	16	15.840	1.184	0.563	0.419	0.434	0.501	0	0	1	0	0	0	d	d.110.6.4	A(41-285)
d4ypoa2	145	145	29	22	20	12.760	0.690	0.293	0.263	0.332	0.286	1	0	0	0	0	0	a	a.100.1.0	A(181-325)
d4z9ha_	165	165	44	18	13	10.296	1.419	0.554	0.424	0.775	0.507	0	0	1	0	0	0	a	a.24.2.0	A
d4zdsa1	131	131	26	21	17	9.282	0.684	0.571	0.411	0.736	0.502	0	0	1	0	0	0	a	a.140.5.1	A(174-304)
d4zeya1	83	83	35	14	9	4.410	1.522	0.602	0.465	0.601	0.545	0	0	1	0	0	0	a	a.7.16.1	A(4-86)
d4zh7a2	81	81	31	15	11	5.115	1.192	0.564	0.378	0.779	0.474	0	0	1	0	0	0	d	d.403.1.1	A(177-257)
d5ae0a_	217	217	33	24	20	15.840	0.750	0.777	0.576	0.805	0.692	0	0	1	1	0	0	d	d.61.1.3	A
d5ax2a_	78	78	26	16	10	4.160	1.000	0.597	0.474	0.567	0.546	0	0	1	0	0	0	g	g.41.17.1	A
d5azpa_	446	446	83	31	25	64.325	1.482	0.247	0.192	0.101	0.221	1	0	0	0	0	0	f	f.5.1.0	A
d5b1na_	59	59	29	11	6	1.914	1.706	0.581	0.555	0.461	0.580	0	0	1	1	0	0	a	a.30.2.1	A
d5b5eb_	501	501	60	38	26	59.280	0.938	0.278	0.224	0.371	0.264	1	0	0	0	0	0	f	f.55.1.1	b
d5b5ee_	79	79	44	18	10	7.920	1.571	0.139	0.190	0.125	0.171	1	0	0	0	1	0	f	f.23.38.1	e
d5b5eh_	63	63	43	22	10	9.460	1.344	0.122	0.145	0.021	0.136	1	0	0	0	1	0	f	f.23.33.1	H
d5b5ei_	35	35	33	7	4	0.924	3.000	0.554	0.555	0.515	0.558	0	0	1	1	1	1	f	f.23.37.1	I
d5b5ej_	40	40	35	11	5	1.925	2.188	0.352	0.353	0.098	0.353	0	1	0	0	1	1	f	f.23.32.1	j
d5b5ek_	37	37	34	8	5	1.360	2.615	0.490	0.454	0.574	0.474	0	1	0	0	0	1	f	f.23.36.1	K
d5b5el_	37	37	36	17	7	4.284	1.500	0.132	0.166	0.007	0.148	1	0	0	0	1	0	f	f.23.31.1	L
d5b5em_	34	34	35	7	5	1.225	2.917	0.619	0.509	0.735	0.580	0	0	1	1	0	1	f	f.23.35.1	M
d5b5et_	30	30	32	8	5	1.280	2.462	0.663	0.491	0.775	0.584	0	0	1	0	0	1	f	f.23.34.1	T
d5b5ex_	38	38	40	8	5	1.600	3.077	0.541	0.441	0.636	0.505	0	0	1	0	0	1	f	f.23.40.1	X
d5b5ez_	62	62	29	10	9	2.610	1.526	0.565	0.499	0.589	0.541	0	0	1	0	0	0	f	f.17.5.1	Z
d5bq9a2	134	134	26	18	16	7.488	0.765	0.527	0.425	0.508	0.486	0	0	1	0	0	0	d	d.400.1.1	A(1-134)
d5br4a1	383	383	37	27	23	22.977	0.740	0.588	0.444	0.523	0.523	0	0	1	0	0	0	e	e.22.1.2	A(1-383)
d5c6na_	446	446	36	33	23	27.324	0.643	0.465	0.425	0.139	0.448	0	1	0	0	0	0	f	f.61.1.1	A
d5ckla1	180	180	24	22	17	8.976	0.615	0.571	0.502	0.689	0.551	0	0	1	1	0	0	a	a.265.1.1	A(11-190)
d5d7wa2	225	225	37	25	19	17.575	0.841	0.532	0.357	0.566	0.457	0	0	1	0	0	0	b	b.80.7.0	A(247-471)
d5d8va_	83	83	18	16	12	3.456	0.643	0.613	0.531	0.533	0.579	0	0	1	1	0	0	g	g.35.1.1	A
d5em0a1	132	132	22	18	15	5.940	0.667	0.620	0.532	0.689	0.591	0	0	1	1	0	0	d	d.110.1.1	A(2-133)
d5fbfa_	267	267	30	24	20	14.400	0.682	0.607	0.489	0.704	0.564	0	0	1	0	0	0	a	a.124.1.0	A
d5ffga2	155	155	35	20	15	10.500	1.000	0.584	0.407	0.661	0.501	0	0	1	0	0	0	b	b.1.15.0	A(440-594)
d5fvka_	82	82	33	13	11	4.719	1.375	0.618	0.457	0.497	0.543	0	0	1	0	0	0	a	a.7.14.0	A
d5fyza2	131	131	27	18	14	6.804	0.844	0.570	0.482	0.556	0.532	0	0	1	0	0	0	g	g.102.1.0	A(623-753)
d5gmkf_	115	115	34	24	17	13.872	0.829	0.243	0.199	0.232	0.226	1	0	0	0	0	0	d	d.395.1.1	F
d5gmkh_	95	95	29	23	11	7.337	0.853	0.287	0.297	0.072	0.294	1	0	0	0	1	0	a	a.2.15.1	H
d5gmza_	143	143	31	27	19	15.903	0.674	0.434	0.269	0.597	0.366	1	0	0	0	0	0	a	a.62.1.1	A
d5gv0a1	161	161	31	21	16	10.416	0.838	0.577	0.426	0.499	0.513	0	0	1	0	0	0	b	b.180.1.0	A(208-368)
d5i1mv_	458	458	57	36	19	38.988	1.036	0.272	0.171	0.216	0.228	1	0	0	0	0	0	f	f.65.1.1	V
d5id6a2	116	116	26	21	17	9.282	0.684	0.464	0.364	0.343	0.423	0	1	0	0	0	0	d	d.398.1.1	A(1011-1136)
d5id6a3	230	230	37	33	23	28.083	0.661	0.342	0.234	0.514	0.300	1	0	0	0	0	0	b	b.111.2.1	A(0-34,515-583,678-808)
d5id6a4	91	91	21	17	13	4.641	0.700	0.632	0.515	0.621	0.581	0	0	1	1	0	0	a	a.302.1.1	A(584-677)
d5id6a5	464	464	51	39	29	57.681	0.750	0.281	0.231	0.128	0.260	1	0	0	0	0	0	e	e.84.1.1	A(35-514)
d5ig6a1	107	107	24	17	14	5.712	0.774	0.595	0.495	0.577	0.554	0	0	1	0	0	0	a	a.29.2.0	A(348-454)
d5ii8a_	131	131	38	20	12	9.120	1.188	0.598	0.414	0.620	0.512	0	0	1	0	0	0	a	a.19.1.1	A
d5k2la_	49	49	15	12	10	1.800	0.682	0.613	0.523	0.447	0.567	0	0	1	1	0	0	d	d.7.1.0	A
d5ktna1	300	300	33	30	17	16.830	0.702	0.601	0.482	0.404	0.553	0	0	1	0	0	0	c	c.145.1.1	A(1-300)
d5lj3n2	135	135	31	24	15	11.160	0.795	0.570	0.354	0.718	0.471	0	0	1	0	0	0	g	g.100.1.1	N(6-144)
d5m0yb1	95	95	25	16	11	4.400	0.926	0.610	0.499	0.657	0.559	0	0	1	0	0	0	b	b.3.2.0	B(8-102)
d5m17a_	349	349	32	29	22	20.416	0.627	0.533	0.448	0.546	0.509	0	0	1	0	0	0	c	c.1.34.0	A
d5m1ea2	167	167	36	25	19	17.100	0.818	0.417	0.274	0.552	0.355	1	0	0	0	0	0	d	d.333.1.0	A(326-492)
d5m33a1	89	89	27	17	11	5.049	0.964	0.599	0.441	0.619	0.529	0	0	1	0	0	0	a	a.135.1.1	A(113-201)
d5mawe_	112	112	26	20	14	7.280	0.765	0.530	0.402	0.549	0.478	0	0	1	0	0	0	a	a.24.19.0	E
d5muxa_	469	469	44	30	24	31.680	0.815	0.595	0.435	0.624	0.527	0	0	1	0	0	0	e	e.44.1.1	A
d5ncga1	111	111	24	17	16	6.528	0.727	0.620	0.451	0.463	0.543	0	0	1	0	0	0	b	b.55.1.4	A(1-111)
d5njcb_	443	443	41	30	24	29.520	0.759	0.251	0.333	0.008	0.293	1	0	0	0	1	0	d	d.283.1.0	B
d5nw3a_	54	54	17	12	11	2.244	0.739	0.915	0.749	0.784	0.844	0	0	1	1	0	0	g	g.41.5.1	A
d5o5ta2	233	233	35	26	24	21.840	0.700	0.524	0.320	0.599	0.430	0	0	1	0	0	0	c	c.8.4.1	A(118-350)
d5o5ta3	157	157	33	22	14	10.164	0.917	0.564	0.417	0.636	0.503	0	0	1	0	0	0	a	a.48.2.1	A(594-750)
d5o9ma1	151	151	30	22	16	10.560	0.789	0.533	0.388	0.567	0.466	0	0	1	0	0	0	b	b.88.1.2	A(1-172)
d5olla_	35	35	16	12	8	1.536	0.800	0.674	0.505	0.805	0.603	0	0	1	1	0	0	g	g.3.4.1	A
d5r0db1	152	152	28	23	19	12.236	0.667	0.518	0.365	0.661	0.456	0	0	1	0	0	0	b	b.182.1.1	B(1-152)
d5r0db2	148	148	25	24	15	9.000	0.641	0.543	0.428	0.684	0.499	0	0	1	0	0	0	a	a.118.29.1	B(170-317)
d5ryoa2	106	106	23	17	11	4.301	0.821	0.587	0.541	0.593	0.576	0	0	1	1	0	0	a	a.11.2.0	A(191-296)
d5syba_	90	90	18	17	14	4.284	0.581	0.531	0.462	0.493	0.504	0	0	1	0	0	0	g	g.101.1.1	A
d5tifa1	180	180	28	21	17	9.996	0.737	0.586	0.484	0.520	0.553	0	0	1	0	0	0	c	c.23.10.5	A(2-181)
d5u3aa2	93	93	23	18	12	4.968	0.767	0.631	0.474	0.591	0.566	0	0	1	0	0	0	b	b.71.1.1	A(404-496)
d5vfba_	724	724	49	35	32	54.880	0.731	0.531	0.376	0.520	0.464	0	0	1	0	0	0	c	c.1.13.1	A
d5wopa_	159	159	25	19	16	7.600	0.714	0.602	0.499	0.724	0.564	0	0	1	0	0	0	d	d.397.1.1	A
d5xbxa1	178	178	27	19	15	7.695	0.794	0.635	0.547	0.669	0.606	0	0	1	1	0	0	b	b.52.1.0	A(1-178)
d5xvta3	146	146	27	21	19	10.773	0.675	0.570	0.375	0.653	0.480	0	0	1	0	0	0	c	c.48.1.0	A(532-677)
d5xz7a1	318	318	41	23	19	17.917	0.976	0.546	0.436	0.650	0.502	0	0	1	0	0	0	c	c.89.1.1	A(1-322)
d5ycqa_	77	77	20	16	12	3.840	0.714	0.642	0.495	0.599	0.574	0	0	1	0	0	0	b	b.34.17.1	A
d5yxma_	194	194	36	18	16	10.368	1.059	0.576	0.475	0.700	0.542	0	0	1	0	0	0	c	c.10.3.1	A
d5yzpa1	105	105	24	17	14	5.712	0.774	0.551	0.429	0.683	0.497	0	0	1	0	0	0	b	b.40.16.0	A(221-325)
d5z1fa2	162	162	35	26	14	12.740	0.875	0.422	0.318	0.415	0.384	0	1	0	0	0	0	d	d.58.63.1	A(185-354,671-696)
d5zioa_	228	228	24	22	19	10.032	0.585	0.594	0.526	0.565	0.575	0	0	1	1	0	0	d	d.157.1.0	A
d5zrta_	160	160	35	17	14	8.330	1.129	0.614	0.501	0.581	0.568	0	0	1	1	0	0	b	b.166.1.0	A
d5zw7a1	230	230	33	27	19	16.929	0.717	0.399	0.344	0.503	0.379	0	1	0	0	0	0	e	e.6.1.0	A(1-230)
d5zw7a2	153	153	41	18	17	12.546	1.171	0.569	0.364	0.672	0.475	0	0	1	0	0	0	a	a.29.3.0	A(231-383)
d6ao9a_	171	171	27	24	16	10.368	0.675	0.590	0.429	0.699	0.519	0	0	1	0	0	0	d	d.58.29.0	A
d6av8a_	29	29	14	11	7	1.078	0.778	0.710	0.530	0.696	0.625	0	0	1	1	0	0	g	g.3.6.2	A
d6bpla1	325	325	61	32	23	44.896	1.109	0.270	0.208	0.115	0.243	1	0	0	0	0	0	f	f.37.1.1	A(4-328)
d6bxda_	192	192	30	19	16	9.120	0.857	0.595	0.500	0.552	0.556	0	0	1	1	0	0	c	c.10.2.0	A
d6cbra1	139	139	33	18	17	10.098	0.943	0.538	0.375	0.615	0.466	0	0	1	0	0	0	a	a.236.1.1	A(443-581)
d6dcma_	85	85	23	15	12	4.140	0.852	0.612	0.497	0.695	0.572	0	0	1	0	0	0	g	g.14.1.0	A
d6e36a_	395	395	46	32	21	30.912	0.868	0.482	0.341	0.585	0.422	0	1	0	0	0	0	b	b.30.6.1	A
d6e6oa_	40	40	15	9	8	1.080	0.882	0.653	0.603	0.737	0.637	0	0	1	1	0	0	a	a.10.1.1	A
d6e85a1	328	328	39	24	19	17.784	0.907	0.536	0.460	0.517	0.509	0	0	1	0	0	0	c	c.77.1.0	A(1-328)
d6ea3a_	70	70	29	14	11	4.466	1.160	0.556	0.419	0.776	0.505	0	0	1	0	0	0	d	d.100.2.0	A
d6enia_	104	104	28	23	16	10.304	0.718	0.245	0.236	0.024	0.238	1	0	0	0	0	0	a	a.4.12.1	A
d6fgca1	180	180	61	19	16	18.544	1.743	0.312	0.240	0.161	0.281	1	0	0	0	0	0	b	b.103.1.1	A(319-498)
d6fgca3	77	77	26	15	14	5.460	0.897	0.565	0.397	0.492	0.493	0	0	1	0	0	0	b	b.85.6.0	A(654-736)
d6frea1	150	150	23	20	16	7.360	0.639	0.616	0.510	0.629	0.576	0	0	1	1	0	0	b	b.86.1.2	A(-6-159)
d6ftfb1	145	145	25	22	16	8.800	0.658	0.546	0.430	0.573	0.500	0	0	1	0	0	0	b	b.82.3.0	B(211-355)
d6g6ka1	87	87	57	17	11	10.659	2.036	0.246	0.213	0.105	0.230	1	0	0	0	0	1	a	a.38.1.0	A(898-984)
d6gkea_	309	309	30	25	23	17.250	0.625	0.571	0.459	0.516	0.523	0	0	1	0	0	0	b	b.68.8.1	A
d6gkxa_	134	134	30	25	13	9.750	0.789	0.440	0.338	0.649	0.404	0	1	0	0	0	0	b	b.106.1.0	A
d6gx2a1	291	291	34	26	20	17.680	0.739	0.583	0.458	0.653	0.533	0	0	1	0	0	0	c	c.68.1.9	A(64-354)
[truncated: 125 more rows]
