# Supplementary material for: Improved Assessment of Globularity of Protein Structures and the Ellipsoid Profile of the Biological Assemblies from the PDB
Source: Biomolecules. 2023 Feb 17;13(2):385. doi: 10.3390/biom13020385 (PMC9953691; doi:10.3390/biom13020385)
Supplement: Supplementary file 1 [file biomolecules-13-00385-s001.zip › s8.tsv]

ASSEMBLY	EFFECTIVE	GUIDES	R_X	R_Y	R_Z	V	T	EI_0.3	EI_1.0	EP_0.1	EP_1.0	C_N	C_S	C_G	C_H	C_U	C_E	GROUP	SYMMETRY	FINGERPRINT
16vp_1	311	293	46	21	16	15.456	1.243	0.583	0.495	0.598	0.554	0	0	1	0	0	0	A1o	A	(d.180.1.1)*1
1914_1	171	156	24	20	15	7.200	0.686	0.599	0.531	0.592	0.577	0	0	1	1	0	0	A1m	A	(d.49.1.1,d.49.1.1)*1
1a0p_1	271	255	39	20	19	14.820	1.000	0.546	0.457	0.437	0.510	0	0	1	0	0	0	A1m	A	(a.60.9.1,d.163.1.1)*1
1a12_1	1203	1149	48	48	29	66.816	0.623	0.465	0.429	0.217	0.455	0	1	0	0	0	0	C3	C3	(b.69.5.1)*3
1a17_1	636	612	69	33	18	40.986	1.353	0.492	0.405	0.190	0.448	0	1	0	0	0	0	D2	D2	(a.118.8.1)*4
1a19_1	178	176	30	18	14	7.560	0.938	0.562	0.533	0.414	0.556	0	0	1	1	0	0	C2o=	C2	(c.9.1.1)*2
1a2o_1	347	343	36	21	20	15.120	0.878	0.574	0.520	0.555	0.557	0	0	1	1	0	0	A1m	A	(c.23.1.1,c.40.1.1)*1
1a2y_1	352	327	44	24	19	20.064	1.023	0.571	0.427	0.549	0.504	0	0	1	0	0	0	A3	A	(b.1.1.1)*2+(d.2.1.2)*1
1a2z_1	880	851	50	40	25	50.000	0.769	0.522	0.443	0.498	0.492	0	0	1	0	0	0	D2	D2	(c.56.4.1)*4
1a32_1	85	73	28	20	12	6.720	0.875	0.466	0.292	0.679	0.392	1	0	0	0	0	0	A1o	A	(a.16.1.2)*1
1a45_1	346	344	60	17	17	17.340	1.765	0.623	0.511	0.608	0.571	0	0	1	1	0	0	C2m=	C2	(b.11.1.1,b.11.1.1)*2
1a4y_1	1166	1156	53	37	34	66.674	0.746	0.351	0.393	0.014	0.362	0	1	0	0	1	0	C2o≠	C2	(c.10.1.1)*2+(d.5.1.1)*2
1a5t_1	648	610	59	32	30	56.640	0.952	0.300	0.286	0.043	0.293	1	0	0	0	0	0	C2m=	C2	(c.37.1.20,a.80.1.1)*2
1a62_1	125	117	25	16	13	5.200	0.862	0.598	0.517	0.411	0.558	0	0	1	1	0	0	A1m	A	(a.140.3.1,b.40.4.5)*1
1a79_1	684	641	65	31	18	36.270	1.327	0.545	0.478	0.409	0.525	0	0	1	0	0	0	C2m=	C2	(d.75.1.1,c.52.2.1)*4
1a8d_1	452	428	46	24	22	24.288	1.000	0.551	0.465	0.625	0.523	0	0	1	0	0	0	A1m	A	(b.29.1.6,b.42.4.2)*1
1a8l_1	452	410	40	29	19	22.040	0.833	0.538	0.457	0.536	0.508	0	0	1	0	0	0	C2m=	C2	(c.47.1.2,c.47.1.2)*2
1a8r_1	2210	2210	57	57	37	120.213	0.606	0.430	0.444	0.136	0.431	0	1	0	0	1	0	D4+	D5	(d.96.1.1)*10
1aa7_1	315	298	35	21	19	13.965	0.875	0.584	0.498	0.629	0.548	0	0	1	0	0	0	C2o=	C2	(a.95.1.1)*2
1aap_1	112	107	24	17	11	4.488	0.857	0.590	0.506	0.651	0.551	0	0	1	1	0	0	C2o=	C2	(g.8.1.1)*2
1adu_1	573	514	55	29	26	41.470	1.000	0.423	0.332	0.431	0.386	0	1	0	0	0	0	A2	A	(a.54.1.1,g.51.1.1,g.51.1.1)*2
1ae9_1	1011	933	61	60	20	73.200	0.762	0.476	0.346	0.324	0.412	0	1	0	0	0	0	C3	C3	(d.163.1.1)*6
1aep_1	153	149	33	15	12	5.940	1.222	0.571	0.543	0.550	0.567	0	0	1	1	0	0	A1o	A	(a.63.1.1)*1
1af7_1	274	253	35	25	16	14.000	0.854	0.555	0.471	0.524	0.521	0	0	1	0	0	0	A1m	A	(a.58.1.1,c.66.1.8)*1
1afv_1	1176	1056	101	34	28	96.152	1.629	0.376	0.279	0.190	0.327	1	0	0	0	0	0	C2m≠	C2	(a.73.1.1)*2+(b.1.1.1,b.1.1.2)*4
1ah7_1	245	236	30	20	17	10.200	0.811	0.604	0.563	0.652	0.598	0	0	1	1	0	0	A1o	A	(a.124.1.1)*1
1ahs_1	378	378	30	30	23	20.700	0.566	0.546	0.443	0.283	0.498	0	0	1	0	0	0	C3	C3	(b.19.1.1)*3
1ahu_1	4440	4404	84	83	42	292.824	0.672	0.428	0.399	0.068	0.417	0	1	0	0	0	0	D4+	D4	(d.145.1.1,d.58.32.1)*8
1ahw_1	1256	1136	106	43	26	118.508	1.536	0.301	0.252	0.078	0.277	1	0	0	0	0	0	A4+	A	(b.1.1.1,b.1.1.2)*4+(b.1.2.1,b.1.2.1)*2
1aie_1	124	120	21	21	15	6.615	0.583	0.600	0.474	0.416	0.543	0	0	1	0	0	0	D2	D2	(a.53.1.1)*4
1ail_1	140	138	24	17	15	6.120	0.750	0.557	0.519	0.319	0.542	0	0	1	1	0	0	C2o=	C2	(a.16.1.1)*2
1aip_1	1136	913	69	44	25	75.900	1.000	0.386	0.316	0.163	0.353	0	1	0	0	0	0	C2m≠	C2	(a.5.2.2,d.43.1.1)*2+(c.37.1.8,b.43.3.1,b.44.1.1)*2
1ajj_1	37	33	12	11	6	0.792	0.706	0.696	0.659	0.525	0.683	0	0	1	1	0	0	A1o	A	(g.12.1.1)*1
1aol_1	228	209	30	22	15	9.900	0.811	0.613	0.513	0.514	0.575	0	0	1	1	0	0	A1o	A	(b.20.1.1)*1
1aom_1	998	876	60	30	27	48.600	1.053	0.552	0.466	0.352	0.520	0	0	1	0	0	0	A2	A	(a.3.1.2,b.70.2.1)*1+(b.70.2.1)*1
1aor_1	1210	1175	65	34	27	59.670	1.066	0.505	0.468	0.552	0.499	0	0	1	0	0	0	C2m=	C2	(d.152.1.1,a.110.1.1)*2
1aoz_1	1104	1053	64	36	29	66.816	0.985	0.469	0.411	0.339	0.443	0	1	0	0	0	0	C2m=	C2	(b.6.1.3,b.6.1.3,b.6.1.3)*2
1apx_1	498	464	42	28	20	23.520	0.875	0.559	0.477	0.573	0.527	0	0	1	0	0	0	C2o=	C2	(a.93.1.1)*2
1aqt_1	270	222	33	22	16	11.616	0.868	0.539	0.443	0.323	0.491	0	0	1	0	0	0	C2m=	C2	(b.93.1.1,a.2.10.1)*2
1aro_1	923	840	52	41	30	63.960	0.732	0.413	0.347	0.546	0.393	0	1	0	0	0	0	A2	A	(d.118.1.1)*1+(e.8.1.3)*1
1at0_1	290	274	31	21	21	13.671	0.738	0.566	0.478	0.364	0.528	0	0	1	0	0	0	C2o=	C2	(b.86.1.1)*2
1aua_1	592	576	55	31	23	39.215	1.019	0.423	0.374	0.469	0.410	0	1	0	0	0	0	C2m=	C2	(a.5.3.1,c.13.1.1)*2
1aue_2	94	93	22	16	11	3.872	0.815	0.614	0.557	0.556	0.599	0	0	1	1	0	0	A1o	A	(a.24.7.1)*1
1ava_1	584	563	40	35	22	30.800	0.702	0.554	0.471	0.569	0.523	0	0	1	0	0	0	A2	A	(b.42.4.1)*1+(c.1.8.1,b.71.1.1)*1
1avq_1	681	654	47	45	22	46.530	0.701	0.294	0.358	0.022	0.330	1	0	0	0	1	0	C3	C3	(c.52.1.13)*3
1avv_1	198	188	38	19	17	12.274	1.056	0.553	0.436	0.571	0.506	0	0	1	0	0	0	C2o=	C2	(d.102.1.1)*2
1avw_1	394	382	39	24	20	18.720	0.886	0.563	0.480	0.647	0.534	0	0	1	0	0	0	A2	A	(b.42.4.1)*1+(b.47.1.2)*1
1avz_1	260	251	34	27	17	15.606	0.773	0.469	0.389	0.453	0.435	0	1	0	0	0	0	A3	A	(b.34.2.1)*1+(d.102.1.1)*2
1b0n_1	134	127	29	16	13	6.032	1.000	0.594	0.509	0.601	0.559	0	0	1	1	0	0	A2	A	(a.34.1.1)*1+(a.35.1.3,a.34.1.1)*1
1b12_1	239	208	30	22	16	10.560	0.789	0.604	0.485	0.678	0.558	0	0	1	0	0	0	A1o	A	(b.87.1.2)*1
1b24_1	173	155	27	17	15	6.885	0.844	0.575	0.521	0.757	0.567	0	0	1	1	0	0	A1m	A	(d.95.2.1,d.95.2.1)*1
1b25_1	2444	2274	74	72	33	175.824	0.705	0.382	0.341	0.071	0.364	0	1	0	0	0	0	D2	D2	(d.152.1.1,a.110.1.1)*4
1b2p_1	476	440	36	32	27	31.104	0.610	0.368	0.363	0.042	0.362	0	1	0	0	0	0	D2	D2	(b.78.1.1)*4
1b33_1	1030	984	58	56	20	64.960	0.763	0.374	0.369	0.361	0.381	0	1	0	0	0	0	A4+	A	(a.1.1.3)*6+(d.30.1.1)*1
1b4u_1	860	798	51	31	26	41.106	0.895	0.578	0.494	0.542	0.545	0	0	1	0	0	0	C2o≠	C2	(a.88.1.1)*2+(c.56.6.1)*2
1b5s_1	14520	14520	117	116	116	1574.352	0.504	0.003	0.099	0.000	0.053	1	0	0	0	1	0	TOI	I	(c.43.1.1)*60
1b63_1	666	658	41	38	27	42.066	0.631	0.454	0.401	0.484	0.436	0	1	0	0	0	0	C2m=	C2	(d.122.1.2,d.14.1.3)*2
1bcp_1	935	838	50	34	32	54.400	0.758	0.531	0.412	0.577	0.481	0	0	1	0	0	0	A4+	A	(b.40.2.1)*3+(d.166.1.1)*1+(d.169.1.2,b.40.2.1)*2
1bdf_1	917	848	89	33	19	55.803	1.712	0.492	0.386	0.439	0.443	0	1	0	0	0	0	C2m=	C2	(d.74.3.1,d.181.1.1)*4
1bdo_1	160	154	30	17	15	7.650	0.938	0.539	0.459	0.319	0.506	0	0	1	0	0	0	C2o=	C2	(b.84.1.1)*2
1bgf_1	248	228	37	24	17	15.096	0.902	0.547	0.441	0.488	0.511	0	0	1	0	0	0	C2o=	C2	(a.90.1.1)*2
1bgv_1	2694	2466	62	53	52	170.872	0.590	0.543	0.388	0.194	0.464	0	0	1	0	0	0	D3	D3	(c.58.1.1,c.2.1.7)*6
1bgx_1	1247	1147	63	43	35	94.815	0.808	0.426	0.333	0.509	0.392	0	1	0	0	0	0	A3	A	(b.1.1.1,b.1.1.2)*2+(c.120.1.2,a.60.7.1,c.55.3.5,e.8.1.1)*1
1bgy_1	3977	3713	95	69	50	327.750	0.798	0.356	0.308	0.218	0.336	0	1	0	0	0	0	A4+	A	(a.3.1.3,f.23.11.1)*2+(d.184.1.3)*2+(d.185.1.1,d.185.1.1)*4+(f.21.1.2,f.32.1.1)*2+(f.23.12.1)*1+(f.23.12.1,b.33.1.1)*1+(f.23.13.1)*2+(f.23.14.1)*2+(f.23.15.1)*2+(f.27.1.1)*2+(f.28.1.1)*2
1bht_1	350	336	32	29	20	18.560	0.653	0.505	0.444	0.369	0.481	0	0	1	0	0	0	C2m=	C2	(g.10.1.1,g.14.1.1)*2
1bi7_1	788	774	51	35	25	44.625	0.850	0.479	0.432	0.258	0.458	0	1	0	0	0	0	C2o≠	C2	(d.144.1.7)*2+(d.211.1.1)*2
1bih_1	782	695	53	52	24	66.144	0.697	0.339	0.289	0.197	0.319	1	0	0	0	0	0	C2m=	C2	(b.1.1.4,b.1.1.4,b.1.1.4,b.1.1.4)*2
1bik_1	110	106	28	14	11	4.312	1.120	0.615	0.538	0.679	0.594	0	0	1	1	0	0	A1m	A	(g.8.1.1,g.8.1.1)*1
1bkb_1	544	504	56	55	13	40.040	0.824	0.300	0.306	0.005	0.300	0	1	0	0	1	0	C4+	C4	(b.34.5.2,b.40.4.5)*4
1bkr_1	108	106	18	17	14	4.284	0.581	0.613	0.576	0.652	0.611	0	0	1	1	0	0	A1o	A	(a.40.1.1)*1
1ble_1	483	471	42	42	18	31.752	0.700	0.519	0.395	0.432	0.463	0	0	1	0	0	0	C3	C3	(c.38.1.1)*3
1blx_1	465	434	41	28	23	26.404	0.804	0.487	0.411	0.593	0.461	0	1	0	0	0	0	A2	A	(d.144.1.7)*1+(d.211.1.1)*1
1bmt_1	492	475	36	31	27	30.132	0.621	0.379	0.377	0.195	0.383	0	1	0	0	0	0	C2m=	C2	(a.46.1.1,c.23.6.1)*2
1bnd_1	434	384	66	23	16	24.288	1.692	0.502	0.412	0.505	0.468	0	0	1	0	0	0	C2o=	C2	(g.17.1.3)*4
1bow_1	286	280	36	20	20	14.400	0.900	0.560	0.496	0.252	0.533	0	0	1	0	0	0	C2o=	C2	(d.60.1.1)*2
1br1_1	935	808	59	37	26	56.758	0.937	0.497	0.376	0.583	0.444	0	1	0	0	0	0	A2	A	(a.39.1.5)*1+(c.37.1.9,b.34.3.1)*1
1brt_1	831	825	45	44	25	49.500	0.652	0.520	0.433	0.214	0.481	0	0	1	0	0	0	C3	C3	(c.69.1.12)*3
1bsm_1	804	796	42	36	29	43.848	0.646	0.563	0.480	0.367	0.534	0	0	1	0	0	0	D2	D2	(a.2.11.1,d.44.1.1)*4
1btk_1	329	305	46	22	16	16.192	1.211	0.588	0.486	0.578	0.546	0	0	1	0	0	0	C2o=	C2	(b.55.1.1)*2
1bu8_1	446	422	51	25	18	22.950	1.186	0.603	0.473	0.646	0.546	0	0	1	0	0	0	A1m	A	(c.69.1.19,b.12.1.2)*1
1buh_1	357	344	40	27	19	20.520	0.870	0.539	0.439	0.538	0.498	0	0	1	0	0	0	A2	A	(d.144.1.7)*1+(d.97.1.1)*1
1bui_1	617	588	42	33	23	31.878	0.750	0.506	0.447	0.397	0.483	0	0	1	0	0	0	A3	A	(b.47.1.2)*2+(d.15.5.1)*1
1bun_1	181	174	36	22	12	9.504	1.059	0.540	0.446	0.695	0.507	0	0	1	0	0	0	A2	A	(a.133.1.2)*1+(g.8.1.1)*1
1bvn_1	567	550	39	30	23	26.910	0.736	0.584	0.506	0.510	0.555	0	0	1	1	0	0	A2	A	(b.5.1.1)*1+(c.1.8.1,b.71.1.1)*1
1bvy_1	1029	965	75	34	26	66.300	1.250	0.493	0.403	0.538	0.464	0	1	0	0	0	0	A3	A	(a.104.1.1)*2+(c.23.5.1)*1
1bx7_1	51	47	25	10	6	1.500	1.562	0.623	0.536	0.670	0.585	0	0	1	1	0	0	A1o	A	(g.3.15.1)*1
1bxe_1	110	95	30	13	9	3.510	1.364	0.576	0.540	0.553	0.562	0	0	1	1	0	0	A1o	A	(d.55.1.1)*1
1bxr_1	5808	5509	145	85	46	566.950	1.107	0.247	0.255	0.008	0.250	1	0	0	0	1	0	D2	D2	(c.30.1.1,d.142.1.2,a.92.1.1,c.30.1.1,d.142.1.2,c.24.1.1)*4+(c.8.3.1,c.23.16.1)*4
1byi_1	448	432	39	26	20	20.280	0.848	0.520	0.491	0.553	0.516	0	0	1	0	0	0	C2o=	C2	(c.37.1.10)*2
1byr_1	304	300	34	20	17	11.560	0.919	0.604	0.572	0.611	0.600	0	0	1	1	0	0	C2o=	C2	(d.136.1.1)*2
1bz4_1	144	140	37	14	12	6.216	1.423	0.595	0.534	0.533	0.575	0	0	1	1	0	0	A1o	A	(a.24.1.1)*1
1c0p_1	726	658	45	36	23	37.260	0.763	0.502	0.436	0.374	0.478	0	0	1	0	0	0	C2m=	C2	(c.4.1.2,d.16.1.3)*2
1c1k_1	217	214	36	20	16	11.520	1.000	0.596	0.499	0.567	0.560	0	0	1	0	0	0	A1o	A	(a.120.1.1)*1
1c1y_1	244	224	32	20	18	11.520	0.842	0.544	0.478	0.631	0.522	0	0	1	0	0	0	A2	A	(c.37.1.8)*1+(d.15.1.5)*1
1c3w_1	666	663	36	32	32	36.864	0.562	0.442	0.440	0.132	0.437	0	1	0	0	0	0	C3	C3	(f.13.1.1)*3
1c4z_1	1194	1072	60	44	33	87.120	0.779	0.430	0.349	0.319	0.399	0	1	0	0	0	0	A4+	A	(d.148.1.1)*3+(d.20.1.1)*1
1c5e_1	285	282	28	28	15	11.760	0.651	0.505	0.510	0.450	0.518	0	0	1	1	1	0	C3	C3	(b.85.2.1)*3
1c6v_1	630	601	55	30	24	39.600	1.019	0.471	0.391	0.452	0.438	0	1	0	0	0	0	A4+	A	(b.34.7.1)*1+(c.55.3.2)*4
1c75_1	71	71	14	13	12	2.184	0.560	0.463	0.524	0.222	0.492	0	1	0	0	1	0	A1o	A	(a.3.1.1)*1
1c7k_1	132	132	23	18	13	5.382	0.742	0.587	0.544	0.751	0.582	0	0	1	1	0	0	A1o	A	(d.92.1.1)*1
1c8b_1	1280	1234	58	41	37	87.986	0.744	0.408	0.329	0.164	0.371	0	1	0	0	0	0	D2	D2	(c.56.1.2)*4
1c8u_1	570	542	40	28	25	28.000	0.755	0.590	0.498	0.577	0.556	0	0	1	0	0	0	C2m=	C2	(d.38.1.3,d.38.1.3)*2
1c8z_1	265	240	27	22	21	12.474	0.628	0.609	0.478	0.679	0.552	0	0	1	0	0	0	A1o	A	(d.23.1.1)*1
1c96_1	753	718	40	34	28	38.080	0.645	0.572	0.485	0.557	0.539	0	0	1	0	0	0	A1m	A	(c.83.1.1,c.8.2.1)*1
1cb6_1	691	652	50	34	24	40.800	0.862	0.505	0.402	0.537	0.463	0	0	1	0	0	0	A1m	A	(c.94.1.2,c.94.1.2)*1
1cbu_1	539	488	39	37	22	31.746	0.661	0.516	0.400	0.473	0.465	0	0	1	0	0	0	C3	C3	(c.37.1.11)*3
1cby_1	454	442	31	30	23	21.390	0.585	0.534	0.501	0.395	0.519	0	0	1	1	0	0	C2o=	C2	(d.103.1.1)*2
1cc8_1	72	71	20	12	11	2.640	0.870	0.590	0.576	0.467	0.593	0	0	1	1	0	0	A1o	A	(d.58.17.1)*1
1ccw_1	1240	1122	60	34	33	67.320	0.896	0.534	0.438	0.655	0.502	0	0	1	0	0	0	C2o≠	C2	(c.1.19.2)*2+(c.23.6.1)*2
1cdz_1	96	89	22	14	12	3.696	0.846	0.654	0.572	0.646	0.623	0	0	1	1	0	0	A1o	A	(c.15.1.1)*1
1cfr_1	1132	1004	74	36	35	93.240	1.042	0.473	0.301	0.398	0.387	0	1	0	0	0	0	D2	D2	(c.52.1.7)*4
1cfz_1	162	153	22	21	14	6.468	0.629	0.582	0.538	0.658	0.574	0	0	1	1	0	0	A1o	A	(c.56.1.1)*1
1chd_1	198	191	22	19	18	7.524	0.595	0.600	0.556	0.703	0.592	0	0	1	1	0	0	A1o	A	(c.40.1.1)*1
1chm_1	802	775	43	32	31	42.656	0.683	0.531	0.492	0.566	0.529	0	0	1	0	0	0	C2m=	C2	(c.55.2.1,d.127.1.1)*2
1ci4_1	177	172	29	16	15	6.960	0.935	0.638	0.563	0.608	0.613	0	0	1	1	0	0	C2o=	C2	(a.60.5.1)*2
1cjy_1	633	599	56	31	22	38.192	1.057	0.554	0.421	0.578	0.500	0	0	1	0	0	0	A1m	A	(b.7.1.1,c.19.1.2)*1
1ck7_1	619	577	48	33	24	38.016	0.842	0.459	0.385	0.422	0.428	0	1	0	0	0	0	A1m	A	(a.20.1.2,d.92.1.11,g.14.1.2,g.14.1.2,g.14.1.2,b.66.1.1)*1
1ckm_1	317	304	34	28	20	19.040	0.708	0.418	0.400	0.179	0.414	0	1	0	0	0	0	A1m	A	(d.142.2.3,b.40.4.6)*1
1cks_1	460	460	35	31	30	32.550	0.574	0.409	0.404	0.054	0.409	0	1	0	0	0	0	D3	D3	(d.97.1.1)*6
1cku_1	170	165	26	20	15	7.800	0.743	0.558	0.477	0.581	0.524	0	0	1	0	0	0	C2o=	C2	(g.35.1.1)*2
1clv_1	503	492	40	26	22	22.880	0.833	0.585	0.526	0.565	0.565	0	0	1	1	0	0	A2	A	(c.1.8.1,b.71.1.1)*1+(g.3.2.1)*1
1cmx_1	517	482	46	28	20	25.760	0.958	0.571	0.469	0.605	0.528	0	0	1	0	0	0	A4+	A	(d.15.1.1)*2+(d.3.1.6)*2
1coa_1	768	768	40	40	34	54.400	0.541	0.357	0.374	0.121	0.379	0	1	0	0	1	0	D4+	D6	(d.40.1.1)*12
1col_1	197	196	24	18	18	7.776	0.667	0.574	0.550	0.508	0.575	0	0	1	1	0	0	A1o	A	(f.1.1.1)*1
1cq3_1	448	416	39	27	25	26.325	0.750	0.456	0.373	0.198	0.414	0	1	0	0	0	0	C2o=	C2	(b.27.1.1)*2
1cqx_1	403	391	37	29	23	24.679	0.712	0.456	0.402	0.450	0.436	0	1	0	0	0	0	A1m	A	(a.1.1.2,b.43.4.2,c.25.1.5)*1
1crk_1	3040	2644	72	70	49	246.960	0.605	0.382	0.299	0.110	0.339	1	0	0	0	0	0	D4+	D4	(a.83.1.1,d.128.1.2)*8
1ctf_1	136	126	26	15	14	5.460	0.897	0.540	0.506	0.420	0.537	0	0	1	1	0	0	C2o=	C2	(d.45.1.1)*2
1ctt_1	588	546	43	28	23	27.692	0.843	0.568	0.497	0.463	0.552	0	0	1	0	0	0	C2m=	C2	(c.97.1.1,c.97.1.1)*2
1cu1_1	1290	1282	58	40	35	81.200	0.773	0.375	0.377	0.049	0.377	0	1	0	0	1	0	C2m=	C2	(b.47.1.3,c.37.1.14,c.37.1.14)*2
1cuk_1	760	748	47	46	22	47.564	0.691	0.477	0.392	0.390	0.450	0	1	0	0	0	0	C4+	C4	(b.40.4.2,a.60.2.1,a.5.1.1)*4
1cul_1	707	625	53	33	27	47.223	0.883	0.417	0.352	0.554	0.395	0	1	0	0	0	0	A3	A	(c.37.1.8,a.66.1.1)*1+(d.58.29.1)*2
1cun_1	639	521	66	62	14	57.288	0.868	0.373	0.263	0.095	0.311	1	0	0	0	0	0	C3	C3	(a.7.1.1,a.7.1.1)*3
1cvr_1	432	424	38	26	22	21.736	0.792	0.588	0.494	0.583	0.556	0	0	1	0	0	0	A1m	A	(c.17.1.2,b.1.18.12)*1
1cvs_1	665	554	43	42	21	37.926	0.683	0.412	0.360	0.266	0.394	0	1	0	0	0	0	C2m≠	C2	(b.1.1.4,b.1.1.4)*2+(b.42.1.1)*2
1cwv_1	484	426	112	19	15	31.920	3.294	0.387	0.325	0.433	0.363	0	1	0	0	0	1	A1m	A	(b.1.14.1,b.1.14.1,b.1.14.1,b.1.14.1,d.169.1.3)*1
1cx8_1	1278	1193	58	41	30	71.340	0.817	0.471	0.427	0.455	0.462	0	1	0	0	0	0	C2m=	C2	(c.56.5.5,c.8.4.1,a.48.2.1)*2
1cxz_1	268	242	35	23	17	13.685	0.875	0.559	0.454	0.560	0.520	0	0	1	0	0	0	A2	A	(a.2.6.1)*1+(c.37.1.8)*1
1cy5_1	93	93	19	14	13	3.458	0.704	0.613	0.588	0.624	0.602	0	0	1	1	0	0	A1o	A	(a.77.1.3)*1
1cza_1	898	841	83	28	26	60.424	1.537	0.431	0.368	0.201	0.404	0	1	0	0	0	0	A1m	A	(c.55.1.3,c.55.1.3,c.55.1.3,c.55.1.3)*1
1d01_1	504	468	39	39	18	27.378	0.684	0.498	0.418	0.299	0.460	0	1	0	0	0	0	C3	C3	(h.1.2.1,b.8.1.1)*3
1d09_1	2778	2526	61	60	58	212.280	0.517	0.270	0.298	0.005	0.282	1	0	0	0	1	0	D3	D3	(c.78.1.1,c.78.1.1)*6+(d.58.2.1,g.41.7.1)*6
1d0n_1	1458	1331	106	35	25	92.750	1.767	0.457	0.381	0.484	0.429	0	1	0	0	0	0	C2m=	C2	(d.109.1.1,d.109.1.1,d.109.1.1,d.109.1.1,d.109.1.1,d.109.1.1)*2
1d1b_1	736	687	54	31	26	43.524	0.947	0.513	0.424	0.485	0.479	0	0	1	0	0	0	A1m	A	(c.37.1.9,b.34.3.1)*1
1d2t_1	1332	1296	55	54	32	95.040	0.640	0.421	0.340	0.491	0.388	0	1	0	0	0	0	D3	D3	(a.111.1.1)*6
1d2z_2	261	248	32	22	19	13.376	0.780	0.561	0.458	0.663	0.517	0	0	1	0	0	0	A2	A	(a.77.1.2)*2
1d3y_1	579	550	37	33	27	32.967	0.617	0.468	0.429	0.326	0.457	0	1	0	0	0	0	C2o=	C2	(e.12.1.1)*2
1d4v_1	840	702	37	37	34	46.546	0.521	0.605	0.430	0.523	0.523	0	0	1	0	0	0	C3	C3	(b.22.1.1)*3+(g.24.1.1,g.24.1.1,g.24.1.1)*3
1d5f_1	1050	946	48	47	31	69.936	0.615	0.463	0.380	0.247	0.435	0	1	0	0	0	0	C3	C3	(d.148.1.1)*3
1d6r_1	562	538	45	24	21	22.680	1.000	0.546	0.466	0.363	0.504	0	0	1	0	0	0	C2o≠	C2	(b.47.1.2)*2+(g.3.13.1)*2
1d8l_1	560	526	40	38	25	38.000	0.635	0.434	0.356	0.469	0.409	0	1	0	0	0	0	C4+	C4	(b.40.4.2,a.60.2.1)*4
1dce_1	896	839	53	34	30	54.060	0.828	0.486	0.413	0.621	0.463	0	1	0	0	0	0	A2	A	(a.102.4.3)*1+(a.118.6.1,b.7.4.1,c.10.2.2)*1
1dci_1	1650	1640	46	45	44	91.080	0.517	0.489	0.463	0.319	0.487	0	1	0	0	0	0	D3	D3	(c.14.1.3)*6
1dcq_1	276	265	34	23	16	12.512	0.872	0.584	0.510	0.597	0.560	0	0	1	1	0	0	A1m	A	(g.45.1.1,d.211.1.1)*1
1dd4_1	331	322	36	26	17	15.912	0.837	0.559	0.475	0.555	0.528	0	0	1	0	0	0	C2m≠	C2	(a.108.1.1)*2+(a.108.1.1,d.45.1.1)*2
1dd9_1	310	286	41	22	18	16.236	1.025	0.556	0.451	0.497	0.512	0	0	1	0	0	0	A1o	A	(e.13.1.1)*1
1ddt_1	1046	998	54	49	25	66.150	0.730	0.424	0.376	0.448	0.414	0	1	0	0	0	0	C2m=	C2	(d.166.1.1,f.1.2.1,b.2.1.1)*2
1ddz_1	962	955	46	37	29	49.358	0.697	0.586	0.502	0.440	0.555	0	0	1	1	0	0	C2m=	C2	(c.53.2.1,c.53.2.1)*2
1de4_2	2012	1616	73	48	37	129.648	0.859	0.493	0.356	0.471	0.437	0	1	0	0	0	0	C2m≠	C2	(b.1.1.2)*2+(c.56.5.5,c.8.4.1,a.48.2.1)*2+(d.19.1.1,b.1.1.2)*2
1dee_3	491	456	44	31	20	27.280	0.863	0.462	0.396	0.431	0.433	0	1	0	0	0	0	A3	A	(a.8.1.1)*1+(b.1.1.1,b.1.1.2)*2
1dhn_1	968	968	44	36	36	57.024	0.611	0.369	0.421	0.010	0.389	0	1	0	0	1	0	D4+	D4	(d.96.1.3)*8
1div_1	298	244	45	35	22	34.650	0.789	0.300	0.198	0.493	0.261	1	0	0	0	0	0	C2m=	C2	(d.100.1.1,d.99.1.1)*2
1dj0_1	528	485	41	34	20	27.880	0.759	0.558	0.440	0.504	0.506	0	0	1	0	0	0	C2o=	C2	(d.265.1.1)*2
1dj8_1	158	150	25	17	14	5.950	0.806	0.597	0.548	0.533	0.586	0	0	1	1	0	0	C2o=	C2	(a.57.1.1)*2
1djn_1	1458	1420	53	43	35	79.765	0.679	0.523	0.466	0.478	0.506	0	0	1	0	0	0	C2m=	C2	(c.1.4.1,c.4.1.1,c.3.1.1)*2
1djr_1	515	510	37	35	21	27.195	0.661	0.508	0.491	0.190	0.509	0	0	1	0	0	0	C4+	C5	(b.40.2.1)*5
1djx_2	561	508	48	28	23	30.912	0.941	0.535	0.420	0.527	0.484	0	0	1	0	0	0	A1m	A	(a.39.1.7,c.1.18.1,b.7.1.1)*1
1dkg_1	685	568	42	36	28	42.336	0.656	0.397	0.349	0.114	0.379	0	1	0	0	0	0	A3	A	(c.55.1.1,c.55.1.1)*1+(h.1.9.1,b.73.1.1)*2
1dl5_1	633	586	70	23	22	35.420	1.556	0.505	0.440	0.444	0.478	0	0	1	0	0	0	C2m=	C2	(c.66.1.7,d.197.1.1)*2
1dlj_1	804	738	50	37	24	44.400	0.820	0.546	0.424	0.563	0.488	0	0	1	0	0	0	C2m=	C2	(c.2.1.6,a.100.1.4,c.26.3.1)*2
1dm5_1	1890	1867	59	58	42	143.724	0.590	0.406	0.349	0.167	0.379	0	1	0	0	0	0	D3	D3	(a.65.1.1)*6
1dmg_1	172	156	28	17	15	7.140	0.875	0.598	0.524	0.584	0.565	0	0	1	1	0	0	A1o	A	(c.22.1.1)*1
1dov_1	362	348	71	27	14	26.838	1.732	0.329	0.304	0.050	0.313	0	1	0	0	0	0	C2o=	C2	(a.24.9.1)*2
1dpt_2	117	106	22	17	13	4.862	0.733	0.580	0.482	0.651	0.540	0	0	1	0	0	0	A1o	A	(d.80.1.3)*1
1dq3_1	454	397	39	33	19	24.453	0.750	0.571	0.444	0.632	0.515	0	0	1	0	0	0	A1m	A	(b.86.1.2,d.95.2.2,d.95.2.2,d.50.3.1)*1
1dq8_1	1631	1536	58	40	34	78.880	0.784	0.572	0.492	0.483	0.548	0	0	1	0	0	0	D2	D2	(d.179.1.1,d.58.20.1)*4
1dqv_1	275	264	45	21	18	17.010	1.154	0.414	0.374	0.219	0.398	0	1	0	0	0	0	A1m	A	(b.7.1.2,b.7.1.2)*1
1ds1_1	323	310	31	22	21	14.322	0.721	0.574	0.516	0.583	0.560	0	0	1	1	0	0	A1o	A	(b.82.2.2)*1
1dtd_1	364	345	33	23	21	15.939	0.750	0.593	0.526	0.610	0.567	0	0	1	1	0	0	A2	A	(c.56.5.1)*1+(g.30.1.1)*1
1dto_1	400	326	46	28	24	30.912	0.885	0.476	0.313	0.426	0.394	0	1	0	0	0	0	C2o=	C2	(b.91.1.1)*2
1duv_1	999	983	49	48	27	63.504	0.653	0.557	0.405	0.482	0.482	0	0	1	0	0	0	C3	C3	(c.78.1.1,c.78.1.1)*3
1dvf_1	451	437	43	32	20	27.520	0.827	0.567	0.417	0.508	0.494	0	0	1	0	0	0	D2	D2	(b.1.1.1)*4
1dvk_1	299	266	49	19	17	15.827	1.361	0.557	0.435	0.647	0.505	0	0	1	0	0	0	C2o=	C2	(a.72.1.1)*2
1dvo_1	152	131	38	20	11	8.360	1.226	0.469	0.387	0.380	0.437	0	1	0	0	0	0	A1o	A	(a.136.1.1)*1
1dvp_1	434	396	58	23	19	25.346	1.381	0.477	0.398	0.595	0.448	0	1	0	0	0	0	C2m=	C2	(a.118.9.2,g.50.1.1)*2
1dxg_1	72	72	15	13	12	2.340	0.600	0.609	0.592	0.349	0.603	0	0	1	1	0	0	C2o=	C2	(g.41.5.2)*2
1dxy_1	660	630	51	29	24	35.496	0.962	0.547	0.430	0.574	0.493	0	0	1	0	0	0	C2m=	C2	(c.23.12.1,c.2.1.4)*2
1dy5_1	123	118	24	15	13	4.680	0.857	0.587	0.523	0.669	0.572	0	0	1	1	0	0	A1o	A	(d.5.1.1)*1
1e20_1	555	537	39	39	20	30.420	0.661	0.514	0.460	0.449	0.503	0	0	1	0	0	0	C3	C3	(c.34.1.1)*3
1e2v_1	251	239	49	19	14	13.034	1.485	0.571	0.453	0.645	0.522	0	0	1	0	0	0	A1m	A	(b.2.6.1,b.84.2.2)*1
1e32_1	2628	2424	85	84	23	164.220	0.794	0.456	0.376	0.322	0.427	0	1	0	0	0	0	C4+	C6	(b.52.2.3,d.31.1.1,c.37.1.20)*6
1e3h_1	1803	1680	54	54	41	119.556	0.568	0.379	0.362	0.141	0.375	0	1	0	0	0	0	C3	C3	(d.14.1.4,d.101.1.1,a.4.9.1,d.14.1.4,d.101.1.1,d.52.3.1)*3
1e50_2	250	232	28	25	18	12.600	0.651	0.573	0.484	0.533	0.539	0	0	1	0	0	0	A2	A	(b.2.5.6)*1+(b.54.1.1)*1
1e58_1	494	472	43	27	24	27.864	0.843	0.558	0.447	0.532	0.511	0	0	1	0	0	0	C2o=	C2	(c.60.1.1)*2
1e6p_2	498	448	34	32	23	25.024	0.618	0.563	0.469	0.563	0.527	0	0	1	0	0	0	A1m	A	(c.1.8.5,d.26.3.1,b.72.2.1)*1
1e6y_1	2495	2488	66	45	41	121.770	0.767	0.561	0.518	0.508	0.554	0	0	1	1	0	0	C2m≠	C2	(d.58.31.1)*2+(d.58.31.2,a.89.1.1)*4
1e8c_2	497	483	42	32	21	28.224	0.792	0.480	0.421	0.479	0.461	0	1	0	0	0	0	A1m	A	(c.98.1.1,c.72.2.1,c.59.1.1)*1
1e9y_1	9684	9684	82	81	81	538.002	0.506	0.359	0.426	0.013	0.385	0	1	0	0	1	0	TOI	T	(b.92.1.1,c.1.9.2)*12+(d.8.1.1,b.85.3.1)*12
1eai_1	602	596	49	32	24	37.632	0.875	0.358	0.373	0.108	0.373	0	1	0	0	1	0	C2o≠	C2	(b.47.1.2)*2+(g.22.1.1)*2
1ear_1	284	270	50	19	16	15.200	1.429	0.531	0.445	0.532	0.499	0	0	1	0	0	0	C2m=	C2	(b.107.1.1,d.58.38.1)*2
1ebd_1	951	876	54	35	28	52.920	0.857	0.517	0.410	0.515	0.470	0	0	1	0	0	0	A3	A	(a.9.1.1)*1+(c.3.1.5,c.3.1.5,d.87.1.1)*2
1ec8_1	1768	1649	62	45	43	119.970	0.705	0.467	0.369	0.468	0.434	0	1	0	0	0	0	D2	D2	(d.54.1.1,c.1.11.2)*4
1ecf_1	1984	1936	66	49	35	113.190	0.786	0.409	0.421	0.149	0.420	0	1	0	0	1	0	D2	D2	(d.153.1.1,c.61.1.1)*4
1ecj_1	984	943	53	34	32	57.664	0.803	0.469	0.424	0.427	0.454	0	1	0	0	0	0	C2m=	C2	(d.153.1.1,c.61.1.1)*2
1ecz_1	284	266	34	30	18	18.360	0.708	0.378	0.359	0.323	0.384	0	1	0	0	0	0	C2o=	C2	(b.16.1.1)*2
1edq_1	540	502	48	27	23	29.808	0.960	0.575	0.440	0.590	0.520	0	0	1	0	0	0	A1m	A	(b.1.18.2,c.1.8.5,d.26.3.1)*1
1eej_1	432	414	46	28	26	33.488	0.852	0.318	0.300	0.045	0.306	0	1	0	0	0	0	C2m=	C2	(d.17.3.1,c.47.1.9)*2
1eer_1	592	525	50	41	19	38.950	0.833	0.487	0.375	0.410	0.438	0	1	0	0	0	0	A3	A	(a.26.1.2)*1+(b.1.2.1,b.1.2.1)*2
1ef1_1	768	716	52	33	31	53.196	0.812	0.446	0.382	0.382	0.424	0	1	0	0	0	0	C2m≠	C2	(a.137.5.1)*2+(d.15.1.4,a.11.2.1,b.55.1.5)*2
1efu_1	1292	1176	77	38	33	96.558	1.085	0.401	0.321	0.444	0.370	0	1	0	0	0	0	C2m≠	C2	(a.5.2.2,d.43.1.1,d.43.1.1)*2+(c.37.1.8,b.43.3.1,b.44.1.1)*2
1eg3_1	260	244	34	21	17	12.138	0.895	0.593	0.509	0.597	0.563	0	0	1	1	0	0	A1m	A	(b.72.1.1,a.39.1.7,a.39.1.7)*1
1ega_1	585	540	57	36	19	38.988	1.036	0.442	0.364	0.443	0.411	0	1	0	0	0	0	C2m=	C2	(c.37.1.8,d.52.3.1)*2
1egh_1	910	888	42	42	28	49.392	0.600	0.540	0.456	0.256	0.497	0	0	1	0	0	0	D3	D3	(c.24.1.2)*6
1ehd_1	89	85	20	13	12	3.120	0.800	0.614	0.523	0.677	0.575	0	0	1	1	0	0	A1m	A	(g.3.1.1,g.3.1.1)*1
1ei5_1	1036	1000	51	38	29	56.202	0.761	0.439	0.432	0.444	0.445	0	1	0	0	0	0	C2m=	C2	(e.3.1.1,b.61.3.1,b.61.3.1)*2
1eia_1	828	804	41	40	34	55.760	0.554	0.489	0.392	0.414	0.452	0	1	0	0	0	0	D2	D2	(a.73.1.1,a.28.3.1)*4
1eja_1	276	262	28	23	18	11.592	0.683	0.595	0.502	0.726	0.562	0	0	1	1	0	0	A2	A	(b.47.1.2)*1+(g.3.15.1)*1
1ejb_1	840	811	41	40	27	44.280	0.612	0.529	0.471	0.381	0.510	0	0	1	0	0	0	C4+	C5	(c.16.1.1)*5
1eku_1	506	506	40	37	20	29.600	0.702	0.472	0.451	0.116	0.458	0	1	0	0	0	0	C2m=	C2	(a.26.1.3,a.26.1.3)*2
1el6_1	624	459	35	34	34	40.460	0.515	0.543	0.336	0.638	0.443	0	0	1	0	0	0	C3	C3	(d.182.1.1)*3
1em8_2	259	248	40	19	17	12.920	1.111	0.586	0.477	0.560	0.542	0	0	1	0	0	0	A2	A	(c.126.1.1)*1+(c.128.1.1)*1
1ems_1	1644	1570	79	40	33	104.280	1.082	0.553	0.412	0.415	0.487	0	0	1	0	0	0	D2	D2	(d.160.1.1,d.13.1.1)*4
1en7_1	314	277	46	27	15	18.630	1.095	0.536	0.403	0.587	0.475	0	0	1	0	0	0	C2m=	C2	(d.4.1.5,a.140.4.1)*2
1ep3_1	1144	1058	51	39	37	73.593	0.671	0.473	0.377	0.527	0.434	0	1	0	0	0	0	C2m≠	C2	(b.43.4.2,c.25.1.3)*2+(c.1.4.1)*2
1epu_1	546	500	44	28	26	32.032	0.815	0.542	0.423	0.570	0.490	0	0	1	0	0	0	A1o	A	(e.25.1.1)*1
1epw_1	1287	1182	76	44	24	80.256	1.118	0.468	0.396	0.545	0.443	0	1	0	0	0	0	A1m	A	(d.92.1.7,h.4.2.1,b.29.1.6,b.42.4.2)*1
1eq2_2	1518	1409	55	55	33	99.825	0.625	0.284	0.330	0.010	0.302	1	0	0	0	1	0	C4+	C5	(c.2.1.2)*5
1es6_1	260	252	33	22	17	12.342	0.846	0.572	0.494	0.650	0.546	0	0	1	0	0	0	A1m	A	(b.31.1.1,b.31.1.1)*1
1es7_1	377	340	44	26	18	20.592	1.000	0.545	0.423	0.590	0.495	0	0	1	0	0	0	C2o≠	C2	(g.17.1.2)*2+(g.7.1.3)*2
1esj_1	852	830	43	41	26	45.838	0.642	0.500	0.429	0.488	0.474	0	0	1	0	0	0	C3	C3	(c.72.1.2)*3
1esl_1	157	145	30	17	15	7.650	0.938	0.575	0.468	0.623	0.531	0	0	1	0	0	0	A1m	A	(d.169.1.1,g.3.11.1)*1
1eu1_1	767	743	41	34	29	40.426	0.651	0.513	0.455	0.378	0.492	0	0	1	0	0	0	A1m	A	(c.81.1.1,b.52.2.2)*1
1evl_1	802	734	43	34	32	46.784	0.652	0.519	0.427	0.361	0.482	0	0	1	0	0	0	C2m=	C2	(d.104.1.1,c.51.1.1)*2
1ewf_1	456	411	71	21	17	25.347	1.868	0.490	0.420	0.366	0.462	0	1	0	0	0	0	A1m	A	(d.83.1.1,d.83.1.1)*1
1ewr_1	976	898	55	39	32	68.640	0.775	0.334	0.327	0.117	0.335	0	1	0	0	0	0	C2m=	C2	(c.55.6.1,a.113.1.1,c.37.1.12)*2
1ewy_1	401	378	33	29	23	22.011	0.635	0.521	0.438	0.555	0.490	0	0	1	0	0	0	A2	A	(b.43.4.2,c.25.1.1)*1+(d.15.4.1)*1
1ex4_1	416	316	34	30	24	24.480	0.630	0.518	0.351	0.603	0.441	0	0	1	0	0	0	C2m=	C2	(c.55.3.2,b.34.7.1)*2
1exb_1	1668	1592	57	56	43	137.256	0.576	0.471	0.323	0.348	0.398	0	1	0	0	0	0	C4+	C4	(c.1.7.1)*4+(d.42.1.2)*4
1ext_1	318	300	52	25	19	24.700	1.182	0.345	0.299	0.476	0.341	1	0	0	0	0	0	C2m=	C2	(g.24.1.1,g.24.1.1,g.24.1.1)*2
1eyq_1	212	204	25	21	17	8.925	0.658	0.596	0.532	0.605	0.575	0	0	1	1	0	0	A1o	A	(d.36.1.1)*1
1eyv_1	264	254	29	24	17	11.832	0.707	0.565	0.501	0.528	0.544	0	0	1	1	0	0	C2o=	C2	(a.79.1.1)*2
1ez3_1	124	112	37	14	10	5.180	1.542	0.598	0.508	0.614	0.561	0	0	1	1	0	0	A1o	A	(a.47.2.1)*1
1ezv_1	4122	3679	96	63	57	344.736	0.800	0.367	0.297	0.298	0.336	1	0	0	0	0	0	A4+	A	(a.3.1.3,f.23.11.1)*2+(b.1.1.1)*2+(d.185.1.1,d.185.1.1)*4+(f.21.1.2,f.32.1.1)*2+(f.23.12.1,b.33.1.1)*2+(f.23.13.1)*2+(f.23.14.1)*2+(f.27.1.1)*2+(f.28.1.1)*2
1f00_1	282	263	67	14	13	12.194	2.481	0.594	0.490	0.595	0.550	0	0	1	0	0	1	A1m	A	(b.1.14.1,b.1.14.1,d.169.1.3)*1
1f0l_2	522	511	44	29	21	26.796	0.880	0.541	0.465	0.524	0.514	0	0	1	0	0	0	A1m	A	(d.166.1.1,f.1.2.1,b.2.1.1)*1
1f13_1	1441	1297	61	53	25	80.825	0.782	0.522	0.436	0.509	0.491	0	0	1	0	0	0	C2m=	C2	(b.1.18.9,d.3.1.4,b.1.5.1,b.1.5.1)*2
1f1e_1	302	286	29	29	15	12.615	0.659	0.583	0.511	0.472	0.551	0	0	1	1	0	0	C2o=	C2	(a.22.1.2)*2
1f1m_1	324	309	39	24	16	14.976	0.975	0.577	0.498	0.597	0.551	0	0	1	0	0	0	C2o=	C2	(a.24.12.1)*2
1f1o_1	351	313	55	20	16	17.600	1.528	0.165	0.127	0.052	0.147	1	0	0	0	0	0	A1o	A	(a.127.1.1)*1
1f1s_1	814	781	63	28	26	45.864	1.167	0.502	0.436	0.493	0.478	0	0	1	0	0	0	A1m	A	(b.1.18.2,a.102.3.2,b.30.5.2,b.24.1.1)*1
1f1u_1	1286	1252	56	41	35	80.360	0.737	0.562	0.432	0.497	0.504	0	0	1	0	0	0	D2	D2	(d.32.1.3,d.32.1.3)*4
1f1z_1	260	249	38	20	17	12.920	1.027	0.559	0.479	0.597	0.531	0	0	1	0	0	0	A1m	A	(c.52.1.16,a.4.5.27)*1
1f32_1	127	118	31	17	11	5.797	1.107	0.601	0.484	0.584	0.556	0	0	1	0	0	0	A1o	A	(d.62.1.1)*1
1f34_1	464	452	39	26	24	24.336	0.780	0.535	0.461	0.638	0.513	0	0	1	0	0	0	A2	A	(b.50.1.2)*1+(d.62.1.1)*1
1f35_1	162	153	31	19	13	7.657	0.969	0.596	0.483	0.589	0.543	0	0	1	0	0	0	A1o	A	(b.94.1.1)*1
1f39_1	404	370	38	31	17	20.026	0.792	0.489	0.457	0.337	0.483	0	1	0	0	0	0	C2o=	C2	(b.87.1.1)*4
1f3g_1	450	435	32	31	23	22.816	0.593	0.523	0.435	0.418	0.480	0	0	1	0	0	0	C3	C3	(b.84.3.1)*3
1f3v_1	329	302	36	25	19	17.100	0.818	0.551	0.450	0.553	0.511	0	0	1	0	0	0	A2	A	(d.58.22.1)*1+(h.1.2.1,b.8.1.1)*1
1f51_1	601	564	43	36	27	41.796	0.683	0.465	0.366	0.514	0.420	0	1	0	0	0	0	C2o≠	C2	(c.23.1.1)*2+(d.123.1.1)*2
1f5n_1	570	504	86	26	17	38.012	2.000	0.506	0.365	0.578	0.444	0	0	1	0	0	1	A1m	A	(c.37.1.8,a.114.1.1)*1
1f60_1	530	504	39	30	25	29.250	0.709	0.506	0.439	0.380	0.480	0	0	1	0	0	0	A2	A	(c.37.1.8,b.43.3.1,b.44.1.1)*1+(d.58.12.1)*1
1f6m_1	856	774	57	35	25	49.875	0.950	0.492	0.395	0.542	0.454	0	1	0	0	0	0	C2m≠	C2	(c.3.1.5,c.3.1.5)*2+(c.47.1.1)*2
1f80_1	570	507	38	36	23	31.464	0.644	0.487	0.408	0.503	0.465	0	1	0	0	0	0	C3	C3	(a.28.1.1)*3+(d.150.1.2)*3
1f93_1	260	248	33	27	16	14.256	0.767	0.593	0.444	0.585	0.528	0	0	1	0	0	0	C2o≠	C2	(a.34.2.1)*2+(d.74.1.1)*2
1f9n_1	887	809	43	40	34	58.480	0.581	0.401	0.361	0.199	0.392	0	1	0	0	0	0	D3	D3	(a.4.5.3,d.74.2.1)*6
1fbi_1	564	537	60	27	21	34.020	1.250	0.475	0.397	0.446	0.443	0	1	0	0	0	0	A3	A	(b.1.1.1,b.1.1.2)*2+(d.2.1.2)*1
1fbl_1	734	696	51	35	34	60.690	0.739	0.431	0.318	0.286	0.381	0	1	0	0	0	0	C2m=	C2	(d.92.1.11,b.66.1.1)*2
1fc6_1	386	370	43	25	18	19.350	1.000	0.506	0.447	0.493	0.484	0	0	1	0	0	0	A1m	A	(c.14.1.2,b.36.1.3)*1
1fcd_1	575	554	42	35	22	32.340	0.737	0.552	0.431	0.447	0.497	0	0	1	0	0	0	A2	A	(a.3.1.4,a.3.1.4)*1+(c.3.1.5,c.3.1.5,d.87.1.1)*1
1fcy_1	236	231	30	22	15	9.900	0.811	0.539	0.524	0.655	0.550	0	0	1	1	0	0	A1o	A	(a.123.1.1)*1
1few_1	346	316	60	21	19	23.940	1.500	0.397	0.339	0.080	0.360	0	1	0	0	0	0	C2o=	C2	(a.7.4.1)*2
1fg9_1	862	722	71	34	33	79.662	1.060	0.355	0.255	0.475	0.314	1	0	0	0	0	0	A4+	A	(a.26.1.3)*2+(b.1.2.1,b.1.2.1)*3
1fgj_1	1497	1407	47	47	43	94.987	0.522	0.467	0.401	0.324	0.453	0	1	0	0	0	0	C3	C3	(a.138.1.3)*3
1fi2_1	1206	1176	47	46	25	54.050	0.662	0.556	0.513	0.363	0.543	0	0	1	1	0	0	D3	D3	(b.82.1.2)*6
1fjr_2	188	174	30	19	17	9.690	0.833	0.591	0.470	0.673	0.542	0	0	1	0	0	0	A1o	A	(b.102.1.1)*1
1fkm_1	322	314	36	27	19	18.468	0.783	0.599	0.471	0.621	0.545	0	0	1	0	0	0	A1m	A	(a.69.2.1,a.69.2.1)*1
1fle_1	287	257	27	22	20	11.880	0.643	0.610	0.526	0.692	0.581	0	0	1	1	0	0	A2	A	(b.47.1.2)*1+(g.3.14.1)*1
1flt_1	382	331	56	23	18	23.184	1.366	0.484	0.389	0.475	0.452	0	1	0	0	0	0	C2o≠	C2	(b.1.1.4)*2+(g.17.1.1)*2
1fn9_1	730	717	54	36	21	40.824	0.947	0.485	0.454	0.106	0.475	0	1	0	0	0	0	C2o=	C2	(d.196.1.1)*2
1fnf_1	368	303	86	16	14	19.264	2.867	0.493	0.386	0.482	0.447	0	1	0	0	0	1	A1m	A	(b.1.2.1,b.1.2.1,b.1.2.1,b.1.2.1)*1
1fno_1	816	786	75	28	27	56.700	1.364	0.313	0.341	0.258	0.331	0	1	0	0	1	0	C2m=	C2	(c.56.5.4,d.58.19.1)*2
1fnu_1	884	844	48	44	29	61.248	0.658	0.474	0.381	0.304	0.429	0	1	0	0	0	0	D2	D2	(b.40.2.2,d.15.6.1)*4
1fo1_1	378	318	44	25	23	25.300	0.917	0.478	0.350	0.433	0.424	0	1	0	0	0	0	A2	A	(c.10.2.3)*1+(d.58.7.2,c.10.2.3)*1
1fp2_1	690	666	55	30	23	37.950	1.038	0.544	0.461	0.653	0.508	0	0	1	0	0	0	C2m=	C2	(a.4.5.29,c.66.1.12)*2
1fp3_1	804	793	54	30	29	46.980	0.915	0.541	0.459	0.422	0.508	0	0	1	0	0	0	C2o=	C2	(a.102.1.3)*2
1fpo_1	171	148	32	23	14	10.304	0.865	0.433	0.368	0.523	0.415	0	1	0	0	0	0	A1m	A	(a.2.3.1,a.23.1.1)*1
1fq1_1	479	460	41	32	20	26.240	0.788	0.452	0.431	0.420	0.445	0	1	0	0	0	0	A2	A	(c.45.1.1)*1+(d.144.1.7)*1
1fqj_2	456	415	34	31	25	26.350	0.607	0.487	0.420	0.433	0.457	0	1	0	0	0	0	A2	A	(a.91.1.1)*1+(c.37.1.8,a.66.1.1)*1
1fqv_1	462	405	54	29	17	26.622	1.174	0.453	0.387	0.572	0.430	0	1	0	0	0	0	A2	A	(a.158.1.1,c.10.1.3)*1+(d.42.1.1,a.157.1.1)*1
1fr3_1	402	402	28	27	26	19.656	0.528	0.570	0.511	0.473	0.553	0	0	1	1	0	0	D3	D3	(b.40.6.1)*6
1fr9_1	1480	1400	46	46	40	84.640	0.535	0.437	0.420	0.021	0.423	0	1	0	0	0	0	D4+	D4	(c.68.1.8)*8
1fs0_1	347	315	42	26	16	17.472	1.000	0.575	0.472	0.669	0.537	0	0	1	0	0	0	A2	A	(b.93.1.1,a.2.10.1)*1+(c.49.2.1)*1
1fs1_1	316	292	51	19	17	16.473	1.417	0.571	0.466	0.394	0.527	0	0	1	0	0	0	C2m≠	C2	(a.158.1.1)*2+(d.42.1.1,a.157.1.1)*2
1fs2_1	774	719	76	30	22	50.160	1.462	0.423	0.357	0.258	0.391	0	1	0	0	0	0	C2m≠	C2	(a.158.1.1,c.10.1.3)*2+(d.42.1.1,a.157.1.1)*2
1fs5_1	1596	1560	55	45	45	111.375	0.611	0.483	0.375	0.153	0.429	0	1	0	0	0	0	D3	D3	(c.124.1.1)*6
1fsg_1	932	928	43	37	33	52.503	0.614	0.518	0.468	0.130	0.491	0	0	1	0	0	0	D2	D2	(c.61.1.1)*4
1fsk_1	593	562	63	27	20	34.020	1.340	0.500	0.421	0.549	0.469	0	0	1	0	0	0	A3	A	(b.1.1.1,b.1.1.2)*2+(d.129.3.1)*1
1ftr_1	1184	1176	44	43	34	64.328	0.571	0.514	0.448	0.138	0.476	0	0	1	0	0	0	D2	D2	(d.58.33.1,d.58.33.1)*4
1fui_1	1773	1634	63	62	25	97.650	0.724	0.536	0.438	0.549	0.497	0	0	1	0	0	0	C3	C3	(c.85.1.1,b.43.2.1)*3
1fvf_1	1086	1001	75	42	27	85.050	1.087	0.407	0.330	0.376	0.380	0	1	0	0	0	0	C2o=	C2	(e.25.1.1)*2
1fvu_1	508	454	35	33	29	33.495	0.565	0.522	0.391	0.281	0.456	0	0	1	0	0	0	C2o=	C2	(d.169.1.1)*4
1fwx_1	1180	1115	55	35	29	55.825	0.859	0.577	0.523	0.488	0.567	0	0	1	1	0	0	C2m=	C2	(b.69.3.1,b.6.1.4)*2
1fx0_1	2832	2739	58	58	50	168.200	0.537	0.416	0.411	0.148	0.420	0	1	0	0	0	0	C3	C3	(b.49.1.1,c.37.1.11,a.69.1.1)*6
1fx7_1	450	399	50	24	21	25.200	1.111	0.553	0.427	0.596	0.508	0	0	1	0	0	0	C2m=	C2	(a.4.5.24,a.76.1.1,b.34.1.2)*2
1fxk_1	698	590	44	41	35	63.140	0.579	0.130	0.206	0.003	0.170	1	0	0	0	1	0	C2o=	C2	(a.2.5.1)*6
1fxo_2	1171	1140	50	45	35	78.750	0.625	0.505	0.395	0.480	0.458	0	0	1	0	0	0	D2	D2	(c.68.1.6)*4
1fyh_1	443	371	49	30	19	27.930	1.000	0.510	0.374	0.477	0.450	0	0	1	0	0	0	A2	A	(a.26.1.3,a.26.1.3)*1+(b.1.2.1,b.1.2.1)*1
1fz1_1	2131	2076	76	51	31	120.156	0.927	0.532	0.467	0.531	0.512	0	0	1	0	0	0	C2o≠	C2	(a.23.3.1)*2+(a.25.1.2)*4
1g29_1	744	681	69	28	23	44.436	1.353	0.515	0.399	0.480	0.459	0	0	1	0	0	0	C2m=	C2	(c.37.1.12,b.40.6.3,b.40.6.3)*2
1g2i_1	996	956	49	49	25	60.025	0.662	0.394	0.409	0.096	0.409	0	1	0	0	1	0	D3	D3	(c.23.16.2)*6
1g2r_1	94	85	19	15	13	3.705	0.679	0.616	0.520	0.625	0.576	0	0	1	1	0	0	A1o	A	(d.192.1.1)*1
1g2y_1	60	58	19	12	11	2.508	0.826	0.572	0.475	0.572	0.533	0	0	1	0	0	0	C2o=	C2	(a.34.2.1)*2
1g2z_1	126	122	24	16	13	4.992	0.828	0.613	0.533	0.386	0.577	0	0	1	1	0	0	D2	D2	(a.34.2.1)*4
1g3n_1	681	620	51	34	27	46.818	0.836	0.458	0.357	0.406	0.420	0	1	0	0	0	0	A3	A	(a.74.1.1,a.74.1.1)*1+(d.144.1.7)*1+(d.211.1.1)*1
1g3p_1	192	166	30	21	15	9.450	0.833	0.598	0.452	0.636	0.535	0	0	1	0	0	0	A1m	A	(b.37.1.1,b.37.1.1)*1
1g3t_1	353	336	38	31	23	27.094	0.704	0.393	0.312	0.431	0.358	0	1	0	0	0	0	C2m≠	C2	(a.4.5.24,a.76.1.1)*1+(a.4.5.24,a.76.1.1,b.34.1.2)*1
1g4a_1	4212	4182	86	61	61	320.006	0.705	0.337	0.336	0.136	0.349	0	1	0	0	0	0	C4+	C6	(c.37.1.20)*6+(d.153.1.4)*12
1g4u_1	540	500	55	27	20	29.700	1.170	0.482	0.416	0.599	0.458	0	1	0	0	0	0	A2	A	(a.24.11.1,c.45.1.2)*1+(c.37.1.8)*1
1g4w_1	341	320	38	25	17	16.150	0.905	0.572	0.481	0.585	0.534	0	0	1	0	0	0	A1m	A	(a.24.11.1,c.45.1.2)*1
1g5y_1	912	897	47	42	28	55.272	0.671	0.402	0.411	0.305	0.424	0	1	0	0	1	0	D2	D2	(a.123.1.1)*4
1g6s_1	427	423	39	23	21	18.837	0.886	0.589	0.532	0.338	0.564	0	0	1	1	0	0	A1o	A	(d.68.2.2)*1
1g6x_1	58	56	19	12	9	2.052	0.905	0.652	0.586	0.572	0.631	0	0	1	1	0	0	A1o	A	(g.8.1.1)*1
1g73_2	259	221	40	29	12	13.920	0.976	0.525	0.396	0.580	0.471	0	0	1	0	0	0	A2	A	(a.7.4.1)*1+(g.52.1.1)*1
1g7s_1	576	518	71	30	20	42.600	1.420	0.419	0.306	0.403	0.368	0	1	0	0	0	0	A1m	A	(c.37.1.8,b.43.3.1,c.20.1.1,b.43.3.1)*1
1g87_2	613	576	62	26	20	32.240	1.348	0.601	0.471	0.540	0.549	0	0	1	0	0	0	A1m	A	(a.102.1.2,b.2.2.2)*1
1g8f_1	3060	2970	76	75	45	256.500	0.633	0.392	0.319	0.033	0.348	0	1	0	0	0	0	D3	D3	(b.122.1.3,c.26.1.5,c.37.1.15)*6
1g8m_1	1180	1122	62	40	27	66.960	0.925	0.517	0.423	0.406	0.476	0	0	1	0	0	0	C2m=	C2	(c.24.1.3,c.97.1.4)*2
1g8q_1	176	163	28	17	14	6.664	0.903	0.617	0.537	0.364	0.577	0	0	1	1	0	0	C2o=	C2	(a.135.1.1)*2
1g8t_1	482	467	57	21	19	22.743	1.425	0.603	0.517	0.562	0.573	0	0	1	1	0	0	C2o=	C2	(d.4.1.2)*2
1gci_1	269	265	23	21	19	9.177	0.575	0.617	0.572	0.677	0.604	0	0	1	1	0	0	A1o	A	(c.41.1.1)*1
1gcq_1	182	172	33	20	14	9.240	0.971	0.578	0.469	0.623	0.530	0	0	1	0	0	0	A3	A	(b.34.2.1)*3
1gd8_1	105	98	26	14	11	4.004	1.040	0.591	0.551	0.490	0.576	0	0	1	1	0	0	A1o	A	(d.188.1.1)*1
1gdr_1	105	103	21	15	13	4.095	0.750	0.173	0.160	0.046	0.166	1	0	0	0	0	0	A1o	A	(c.53.1.1)*1
1gh6_1	440	388	62	23	18	25.668	1.512	0.578	0.427	0.650	0.513	0	0	1	0	0	0	A2	A	(a.2.3.1)*1+(a.74.1.3,a.74.1.3)*1
1gkm_1	2028	1952	54	45	45	109.350	0.600	0.571	0.457	0.548	0.524	0	0	1	0	0	0	D2	D2	(a.127.1.2)*4
1gkp_1	1832	1810	64	46	39	114.816	0.753	0.486	0.414	0.265	0.456	0	1	0	0	0	0	D2	D2	(b.92.1.3,c.1.9.6)*4
1gku_1	1011	914	64	47	23	69.184	0.914	0.496	0.362	0.600	0.436	0	1	0	0	0	0	A1m	A	(c.37.1.16,c.37.1.16,e.10.1.1)*1
1gl1_1	273	264	26	22	20	11.440	0.619	0.591	0.521	0.629	0.568	0	0	1	1	0	0	A2	A	(b.47.1.2)*1+(g.4.1.1)*1
1gl4_1	362	325	35	28	20	19.600	0.729	0.541	0.431	0.515	0.500	0	0	1	0	0	0	A2	A	(b.1.1.4)*1+(g.3.11.5,d.22.1.2)*1
1glb_1	2608	2540	60	59	51	180.540	0.545	0.364	0.353	0.351	0.374	0	1	0	0	0	0	D2	D2	(b.84.3.1)*4+(c.55.1.4,c.55.1.4)*4
1gme_2	1560	1554	55	55	40	121.000	0.579	0.284	0.327	0.067	0.316	1	0	0	0	1	0	D3	D3	(b.15.1.1)*12
1gmu_3	140	132	32	15	13	6.240	1.143	0.598	0.486	0.656	0.549	0	0	1	0	0	0	A1m	A	(b.107.1.1,d.58.38.1)*1
1gmx_1	108	104	20	16	13	4.160	0.690	0.610	0.562	0.625	0.597	0	0	1	1	0	0	A1o	A	(c.46.1.3)*1
1gnt_1	553	519	36	32	23	26.496	0.655	0.578	0.494	0.559	0.551	0	0	1	0	0	0	A1o	A	(e.26.1.1)*1
1go3_1	284	268	40	25	15	15.000	1.000	0.589	0.457	0.568	0.529	0	0	1	0	0	0	A2	A	(a.60.8.2)*1+(d.230.1.1,b.40.4.5)*1
1go8_1	920	884	68	32	22	47.872	1.259	0.503	0.450	0.316	0.483	0	0	1	0	0	0	C2m=	C2	(d.92.1.6,b.80.7.1)*2
1goi_1	994	949	66	33	28	60.984	1.082	0.452	0.388	0.568	0.434	0	1	0	0	0	0	C2m=	C2	(c.1.8.5,d.26.3.1,b.72.2.1)*2
1got_1	735	685	49	35	26	44.590	0.803	0.445	0.390	0.609	0.431	0	1	0	0	0	0	A3	A	(a.137.3.1)*1+(b.69.4.1)*1+(c.37.1.8,a.66.1.1)*1
1gp0_1	133	121	24	16	15	5.760	0.774	0.620	0.516	0.582	0.579	0	0	1	1	0	0	A1o	A	(b.64.1.1)*1
1gpj_1	798	738	99	43	21	89.397	1.547	0.277	0.212	0.099	0.247	1	0	0	0	0	0	C2m=	C2	(d.58.39.1,c.2.1.7,a.151.1.1)*2
1gpm_1	2000	1969	76	57	42	181.944	0.768	0.319	0.294	0.127	0.313	1	0	0	0	0	0	D2	D2	(c.23.16.1,c.26.2.1,d.52.2.1)*4
1gpq_1	510	502	47	29	19	25.897	0.979	0.559	0.481	0.522	0.524	0	0	1	0	0	0	C2o≠	C2	(d.2.1.2)*2+(d.233.1.1)*2
1gqe_1	362	305	36	30	18	19.440	0.750	0.539	0.406	0.538	0.482	0	0	1	0	0	0	A1o	A	(e.38.1.1)*1
1gqi_1	1416	1308	59	39	39	89.739	0.756	0.536	0.410	0.504	0.482	0	0	1	0	0	0	C2m=	C2	(d.92.2.2,c.1.8.10)*2
1gqm_1	523	523	32	31	29	28.768	0.533	0.365	0.418	0.003	0.377	0	1	0	0	1	0	D3	D3	(a.39.1.2)*6
1gqy_1	937	888	64	33	25	52.800	1.103	0.487	0.417	0.434	0.464	0	1	0	0	0	0	C2m=	C2	(c.5.1.1,c.72.2.1,c.59.1.1)*2
1gri_1	422	392	39	31	22	26.598	0.736	0.499	0.407	0.342	0.463	0	1	0	0	0	0	C2m=	C2	(b.34.2.1,d.93.1.1,b.34.2.1)*2
1gsa_1	1256	1248	48	43	41	84.624	0.571	0.369	0.373	0.064	0.372	0	1	0	0	1	0	D2	D2	(c.30.1.3,d.142.1.1)*4
1gt9_1	714	685	53	28	23	34.132	1.039	0.565	0.465	0.501	0.523	0	0	1	0	0	0	A2	A	(c.41.1.2)*2
1gte_2	2024	1977	62	57	34	120.156	0.681	0.505	0.425	0.393	0.475	0	0	1	0	0	0	C2m=	C2	(a.1.2.2,c.4.1.1,c.3.1.1,c.1.4.1,d.58.1.5)*2
1gtt_1	421	404	36	28	19	19.152	0.766	0.586	0.512	0.608	0.552	0	0	1	1	0	0	A1m	A	(d.177.1.1,d.177.1.1)*1
1gup_1	691	668	38	31	29	34.162	0.633	0.534	0.489	0.311	0.517	0	0	1	0	0	0	C2m=	C2	(d.13.1.2,d.13.1.2)*2
1gvh_1	4752	4656	106	105	34	378.420	0.763	0.323	0.322	0.030	0.325	0	1	0	0	0	0	D4+	D6	(a.1.1.2,b.43.4.2,c.25.1.5)*12
1gvn_1	718	648	59	29	24	41.064	1.113	0.499	0.419	0.555	0.471	0	1	0	0	0	0	C2o≠	C2	(a.8.2.1)*2+(c.37.1.21)*2
1gwe_1	1992	1964	56	54	36	108.864	0.622	0.537	0.479	0.387	0.523	0	0	1	0	0	0	D2	D2	(e.5.1.1)*4
1gxd_1	816	716	72	32	23	52.992	1.309	0.453	0.355	0.592	0.418	0	1	0	0	0	0	A2	A	(a.20.1.2,d.92.1.11,g.14.1.2,g.14.1.2,g.14.1.2,b.66.1.1)*1+(b.40.3.1)*1
1gxl_1	410	351	30	28	25	21.000	0.566	0.416	0.419	0.080	0.419	0	1	0	0	1	0	C2o=	C2	(d.215.1.1)*2
1gyo_1	212	196	43	18	17	13.158	1.229	0.429	0.369	0.265	0.404	0	1	0	0	0	0	C2o=	C2	(a.138.1.1)*2
1gyx_1	152	144	21	20	16	6.720	0.583	0.576	0.503	0.638	0.549	0	0	1	1	0	0	C2o=	C2	(d.80.1.1)*2
1gz0_1	495	436	41	31	23	29.233	0.759	0.506	0.377	0.555	0.449	0	0	1	0	0	0	C2m=	C2	(d.79.3.3,c.116.1.1)*2
1gz0_2	410	377	36	30	19	20.520	0.735	0.510	0.433	0.561	0.482	0	0	1	0	0	0	A2	A	(c.116.1.1)*1+(d.79.3.3,c.116.1.1)*1
1gz4_1	2204	2012	72	71	30	153.360	0.713	0.464	0.365	0.216	0.418	0	1	0	0	0	0	D2	D2	(c.58.1.3,c.2.1.7)*4
1gz5_1	1822	1788	63	46	45	130.410	0.692	0.422	0.360	0.147	0.391	0	1	0	0	0	0	D2	D2	(c.87.1.6)*4
1gzh_1	412	387	52	27	20	28.080	1.106	0.512	0.385	0.530	0.458	0	0	1	0	0	0	A2	A	(b.2.5.2)*1+(c.15.1.4,c.15.1.4)*1
1gzs_1	343	316	30	27	22	17.820	0.612	0.522	0.450	0.575	0.495	0	0	1	0	0	0	A2	A	(a.168.1.1)*1+(c.37.1.8)*1
1h03_1	125	118	46	11	9	4.554	2.300	0.629	0.544	0.686	0.592	0	0	1	1	0	1	A1m	A	(g.18.1.1,g.18.1.1)*1
1h09_1	338	296	40	27	20	21.600	0.851	0.513	0.385	0.677	0.462	0	0	1	0	0	0	A1m	A	(c.1.8.8,b.109.1.1)*1
1h0d_1	562	525	62	28	19	32.984	1.319	0.501	0.408	0.466	0.464	0	0	1	0	0	0	A3	A	(b.1.1.1,b.1.1.2)*2+(d.5.1.1)*1
1h0h_1	1191	1139	47	40	34	63.920	0.635	0.563	0.472	0.564	0.527	0	0	1	0	0	0	A2	A	(c.81.1.1,b.52.2.2)*1+(d.58.1.5)*1
1h16_1	1518	1408	70	40	30	84.000	1.000	0.549	0.450	0.500	0.508	0	0	1	0	0	0	C2o=	C2	(c.7.1.1)*2
1h1v_1	695	650	52	36	23	43.056	0.881	0.460	0.398	0.333	0.441	0	1	0	0	0	0	A2	A	(c.55.1.1,c.55.1.1)*1+(d.109.1.1,d.109.1.1,d.109.1.1)*1
1h2i_1	2046	2002	60	59	34	120.360	0.645	0.350	0.390	0.002	0.360	0	1	0	0	1	0	C4+	C11	(d.50.1.3)*11
1h2s_1	570	530	47	33	21	32.571	0.870	0.486	0.394	0.475	0.450	0	1	0	0	0	0	C2o≠	C2	(f.13.1.1)*2+(f.17.4.1)*2
1h2t_1	850	803	54	35	28	52.920	0.857	0.487	0.417	0.326	0.455	0	1	0	0	0	0	A2	A	(a.118.1.14,a.118.1.14,a.118.1.14)*1+(d.58.7.1)*1
1h2w_1	710	699	43	34	28	40.936	0.694	0.418	0.448	0.076	0.438	0	1	0	0	1	0	A1m	A	(b.69.7.1,c.69.1.4)*1
1h32_1	396	379	45	24	20	21.600	1.023	0.516	0.444	0.369	0.485	0	0	1	0	0	0	A2	A	(a.3.1.1)*1+(a.3.1.8,a.3.1.8)*1
1h3i_1	293	274	39	22	19	16.302	0.951	0.533	0.418	0.649	0.490	0	0	1	0	0	0	A1m	A	(b.76.2.1,b.85.7.1)*1
1h3l_2	78	78	24	12	11	3.168	1.043	0.591	0.543	0.371	0.577	0	0	1	1	0	0	A1o	A	(a.177.1.1)*1
1h4u_1	245	241	33	21	17	11.781	0.868	0.567	0.502	0.631	0.548	0	0	1	1	0	0	A1m	A	(g.3.11.5,d.22.1.2)*1
1h4x_1	111	110	19	17	14	4.522	0.613	0.606	0.545	0.742	0.584	0	0	1	1	0	0	A1o	A	(c.13.2.1)*1
1h54_1	1507	1367	65	46	29	86.710	0.867	0.469	0.415	0.421	0.451	0	1	0	0	0	0	C2m=	C2	(b.30.5.3,a.102.1.4)*2
1h59_1	297	294	32	31	20	19.840	0.627	0.526	0.382	0.268	0.459	0	0	1	0	0	0	C3	C3	(g.1.1.1)*3+(g.3.9.1)*3
1h64_1	497	480	34	34	20	23.120	0.630	0.395	0.448	0.101	0.424	0	1	0	0	1	0	C4+	C7	(b.38.1.1)*7
1h6g_1	255	238	48	25	12	14.400	1.297	0.425	0.371	0.268	0.405	0	1	0	0	0	0	A1m	A	(a.24.9.1,a.24.9.1)*1
1h6u_1	616	494	48	27	24	31.104	0.941	0.504	0.392	0.490	0.456	0	0	1	0	0	0	C2m=	C2	(c.10.2.1,b.1.18.15)*2
1h72_1	592	560	51	30	19	29.070	1.041	0.594	0.471	0.617	0.541	0	0	1	0	0	0	C2m=	C2	(d.14.1.5,d.58.26.1)*2
1h7c_1	103	98	39	11	10	4.290	1.857	0.580	0.516	0.606	0.556	0	0	1	1	0	0	A1o	A	(a.7.5.1)*1
1h8g_1	378	360	42	35	17	24.990	0.808	0.255	0.349	0.007	0.301	1	0	0	0	1	0	D2	D2	(b.109.1.1)*4
1h99_1	440	428	38	28	21	22.344	0.776	0.545	0.487	0.495	0.525	0	0	1	0	0	0	C2m=	C2	(a.142.1.1,a.142.1.1)*2
1h9j_1	435	435	29	28	26	21.112	0.537	0.535	0.465	0.407	0.511	0	0	1	0	0	0	C3	C3	(b.40.6.2,b.40.6.2)*3
1h9s_1	275	274	28	24	21	14.112	0.622	0.552	0.450	0.672	0.511	0	0	1	0	0	0	C2m=	C2	(b.40.6.2,b.40.6.2)*2
1hc7_1	928	829	51	37	30	56.610	0.761	0.534	0.409	0.412	0.481	0	0	1	0	0	0	C2m=	C2	(d.104.1.1,c.51.1.1,d.68.5.1)*2
1hci_1	950	836	162	25	17	68.850	3.857	0.455	0.351	0.512	0.412	0	1	0	0	0	1	C2m=	C2	(a.7.1.1,a.7.1.1,a.7.1.1,a.7.1.1)*2
1hcx_1	254	237	44	32	14	19.712	0.957	0.362	0.317	0.093	0.340	0	1	0	0	0	0	C2o=	C2	(b.109.1.1)*2
1hdh_1	525	510	33	30	25	24.750	0.600	0.589	0.513	0.656	0.564	0	0	1	1	0	0	A1o	A	(c.76.1.2)*1
1hf2_1	402	374	41	30	19	23.370	0.837	0.475	0.393	0.368	0.442	0	1	0	0	0	0	C2m=	C2	(c.102.1.1,b.80.3.1)*2
1hfe_1	485	470	33	29	23	22.011	0.635	0.606	0.530	0.381	0.579	0	0	1	1	0	0	A2	A	(a.137.4.1)*1+(d.58.1.5,c.96.1.1)*1
1hg4_2	720	616	51	48	18	44.064	0.773	0.528	0.393	0.549	0.473	0	0	1	0	0	0	C3	C3	(a.123.1.1)*3
1hh2_1	688	568	67	41	18	49.446	1.136	0.304	0.294	0.151	0.306	1	0	0	0	0	0	C2m=	C2	(d.202.1.1,b.40.4.5,d.52.3.1,d.52.3.1)*2
1hi9_1	2740	2720	57	56	55	175.560	0.514	0.317	0.384	0.005	0.353	0	1	0	0	1	0	D4+	D5	(c.99.1.1)*10
1hiw_1	338	297	36	35	17	21.420	0.692	0.518	0.357	0.140	0.424	0	0	1	0	0	0	C3	C3	(a.61.1.1)*3
1hn0_1	971	894	64	34	27	58.752	1.049	0.470	0.403	0.459	0.444	0	1	0	0	0	0	A1m	A	(b.18.1.17,a.102.3.2,b.30.5.2,b.24.1.1)*1
1hp1_1	516	496	46	27	21	26.082	0.958	0.541	0.472	0.475	0.518	0	0	1	0	0	0	A1m	A	(d.159.1.2,d.114.1.1)*1
1hqk_1	9240	9240	79	78	78	480.636	0.506	0.066	0.352	0.000	0.226	1	0	0	0	1	0	TOI	I	(c.16.1.1)*60
1hr6_3	898	896	48	38	33	60.192	0.676	0.305	0.367	0.013	0.338	0	1	0	0	1	0	C2m=	C2	(d.185.1.1,d.185.1.1)*2
1hsj_1	974	951	46	42	34	65.688	0.605	0.399	0.368	0.259	0.384	0	1	0	0	0	0	C2m=	C2	(c.94.1.1,a.4.5.28)*2
1ht2_2	1044	1026	56	55	25	77.000	0.700	0.269	0.326	0.009	0.300	1	0	0	0	1	0	C4+	C6	(d.153.1.4)*6
1ht8_1	1102	1030	56	38	28	59.584	0.848	0.542	0.461	0.399	0.511	0	0	1	0	0	0	C2m=	C2	(g.3.11.1,a.93.1.2)*2
1hto_1	5724	5718	81	80	68	440.640	0.547	0.353	0.344	0.045	0.350	0	1	0	0	0	0	D4+	D6	(d.15.9.1,d.128.1.1)*12
1hty_1	1014	983	55	35	29	55.825	0.859	0.582	0.483	0.622	0.548	0	0	1	0	0	0	A1m	A	(c.6.2.1,a.8.3.1,b.30.5.6)*1
1huu_2	74	64	23	18	8	3.312	0.885	0.461	0.382	0.287	0.420	0	1	0	0	0	0	A1o	A	(a.55.1.1)*1
1hw1_1	452	444	37	31	25	28.675	0.661	0.515	0.401	0.418	0.458	0	0	1	0	0	0	C2m=	C2	(a.4.5.6,a.78.1.1)*2
1hw7_1	458	440	41	30	19	23.370	0.837	0.567	0.466	0.392	0.516	0	0	1	0	0	0	C2o=	C2	(d.193.1.1)*2
1hxd_1	305	288	41	23	16	15.088	1.051	0.554	0.464	0.532	0.518	0	0	1	0	0	0	A1m	A	(a.4.5.1,d.104.1.2,b.34.1.1)*1
1hy5_2	121	120	25	13	12	3.900	1.000	0.594	0.580	0.474	0.597	0	0	1	1	0	0	A1o	A	(a.24.11.1)*1
1hyo_1	835	779	45	36	28	45.360	0.703	0.534	0.448	0.502	0.505	0	0	1	0	0	0	C2m=	C2	(b.34.8.1,d.177.1.1)*2
1hyr_1	527	479	59	30	20	35.400	1.180	0.465	0.368	0.391	0.426	0	1	0	0	0	0	A3	A	(d.169.1.1)*2+(d.19.1.1,b.1.1.2)*1
1hyu_1	1042	1012	73	35	22	56.210	1.281	0.461	0.441	0.522	0.470	0	1	0	0	0	0	C2m=	C2	(c.47.1.2,c.47.1.2,c.3.1.5,c.3.1.5)*2
1hz4_1	732	618	53	31	30	49.290	0.869	0.462	0.350	0.444	0.420	0	1	0	0	0	0	C2o=	C2	(a.118.8.2)*2
1i1r_1	936	818	70	42	34	99.960	0.921	0.236	0.224	0.012	0.230	1	0	0	0	0	0	C2m≠	C2	(a.26.1.1)*2+(b.1.2.1,b.1.2.1,b.1.2.1)*2
1i2a_1	212	193	34	19	16	10.336	0.971	0.507	0.437	0.497	0.479	0	0	1	0	0	0	A1o	A	(e.24.1.1)*1
1i2k_1	538	528	44	30	22	29.040	0.846	0.537	0.458	0.389	0.506	0	0	1	0	0	0	C2o=	C2	(e.17.1.1)*2
1i2m_2	554	528	38	27	25	25.650	0.731	0.551	0.496	0.451	0.529	0	0	1	0	0	0	A2	A	(b.69.5.1)*1+(c.37.1.8)*1
1i2t_1	61	58	17	12	10	2.040	0.773	0.610	0.575	0.566	0.601	0	0	1	1	0	0	A1o	A	(a.144.1.1)*1
1i3s_1	283	257	31	23	19	13.547	0.738	0.544	0.479	0.466	0.521	0	0	1	0	0	0	A1o	A	(b.28.1.1)*1
1i4d_1	550	480	56	34	17	32.368	1.098	0.458	0.384	0.502	0.431	0	1	0	0	0	0	A3	A	(a.238.1.2)*2+(c.37.1.8)*1
1i4e_1	536	499	61	25	21	32.025	1.326	0.455	0.408	0.220	0.436	0	1	0	0	0	0	A2	A	(b.28.1.1)*1+(c.17.1.1)*1
1i4m_1	216	210	41	21	13	11.193	1.206	0.607	0.487	0.534	0.555	0	0	1	0	0	0	C2o=	C2	(d.6.1.1)*2
1i4s_1	294	282	37	21	18	13.986	0.949	0.593	0.517	0.629	0.566	0	0	1	1	0	0	C2o=	C2	(a.149.1.1)*2
1i4u_1	361	358	38	23	21	18.354	0.864	0.523	0.479	0.495	0.507	0	0	1	0	0	0	C2o=	C2	(b.60.1.1)*2
1i5p_1	633	587	42	32	24	32.256	0.750	0.588	0.490	0.541	0.550	0	0	1	0	0	0	A1m	A	(f.1.3.1,b.77.2.1,b.18.1.3)*1
1i6v_1	2839	2679	75	58	49	213.150	0.701	0.399	0.323	0.306	0.369	0	1	0	0	0	0	A4+	A	(a.143.1.1)*1+(d.74.3.1,d.181.1.1)*2+(e.29.1.1)*1+(e.29.1.2)*1
1i71_1	83	78	18	16	10	2.880	0.692	0.637	0.593	0.624	0.632	0	0	1	1	0	0	A1o	A	(g.14.1.1)*1
1i7q_1	1418	1328	59	42	37	91.686	0.747	0.480	0.379	0.465	0.439	0	1	0	0	0	0	C2o≠	C2	(c.23.16.1)*2+(d.161.1.1)*2
1iai_1	1732	1616	110	36	31	122.760	1.642	0.457	0.350	0.326	0.405	0	1	0	0	0	0	C2m=	C2	(b.1.1.1,b.1.1.2)*8
1ias_1	1644	1581	67	67	28	125.692	0.705	0.288	0.301	0.033	0.288	1	0	0	0	1	0	C4+	C5	(d.144.1.7)*5
1ib1_1	812	778	45	38	30	51.300	0.662	0.384	0.380	0.032	0.375	0	1	0	0	0	0	C2o≠	C2	(a.118.7.1)*2+(d.108.1.1)*2
1iby_1	336	331	27	26	24	16.848	0.540	0.586	0.478	0.340	0.531	0	0	1	0	0	0	C3	C3	(b.6.1.4)*3
1ifg_1	140	131	31	20	12	7.440	0.969	0.544	0.444	0.553	0.507	0	0	1	0	0	0	A1o	A	(b.16.1.1)*1
1ig0_1	636	597	44	31	25	34.100	0.786	0.528	0.450	0.582	0.501	0	0	1	0	0	0	C2m=	C2	(c.100.1.1,b.82.6.1)*2
1ihg_1	364	337	48	24	19	21.888	1.116	0.470	0.397	0.450	0.443	0	1	0	0	0	0	A1m	A	(b.62.1.1,a.118.8.1)*1
1ijq_1	308	300	31	23	19	13.547	0.738	0.580	0.521	0.559	0.557	0	0	1	1	0	0	A1m	A	(b.68.5.1,g.3.11.1)*1
1ijx_1	250	232	31	21	16	10.416	0.838	0.586	0.506	0.636	0.553	0	0	1	1	0	0	A2	A	(a.141.1.1)*2
1ik6_1	1136	1060	62	39	31	74.958	0.886	0.412	0.341	0.175	0.376	0	1	0	0	0	0	D2	D2	(c.36.1.7,c.48.1.2)*4
1ikp_1	599	567	49	26	25	31.850	0.961	0.525	0.446	0.396	0.495	0	0	1	0	0	0	A1m	A	(b.29.1.7,f.1.5.1,d.166.1.1)*1
1ile_1	821	733	65	32	24	49.920	1.161	0.498	0.394	0.549	0.453	0	1	0	0	0	0	A1m	A	(c.26.1.1,b.51.1.1,a.27.1.1)*1
1im5_1	179	173	24	18	17	7.344	0.686	0.589	0.543	0.643	0.581	0	0	1	1	0	0	A1o	A	(c.33.1.3)*1
1in0_1	162	155	36	16	13	7.488	1.241	0.535	0.474	0.614	0.516	0	0	1	0	0	0	A1m	A	(d.58.49.1,d.58.49.1)*1
1io1_1	395	350	64	29	15	27.840	1.455	0.361	0.300	0.494	0.337	0	1	0	0	0	0	A1o	A	(e.32.1.1)*1
1iom_1	748	680	51	27	27	37.179	0.944	0.582	0.482	0.606	0.550	0	0	1	0	0	0	C2o=	C2	(a.103.1.1)*2
1ipa_1	258	246	40	19	18	13.680	1.081	0.565	0.446	0.581	0.517	0	0	1	0	0	0	A1m	A	(d.79.3.3,c.116.1.1)*1
1iq0_1	588	535	49	34	19	31.654	0.925	0.517	0.422	0.582	0.482	0	0	1	0	0	0	A1m	A	(d.67.2.1,c.26.1.1,a.27.1.1)*1
1iq4_1	179	158	30	18	14	7.560	0.938	0.603	0.505	0.621	0.564	0	0	1	1	0	0	A1o	A	(d.77.1.1)*1
1iq8_1	1154	1066	58	43	32	79.808	0.773	0.525	0.374	0.585	0.454	0	0	1	0	0	0	C2m=	C2	(c.1.20.1,d.17.6.1,b.122.1.1)*2
1iqp_1	1949	1846	74	54	39	155.844	0.796	0.349	0.318	0.533	0.347	0	1	0	0	0	0	C2m=	C2	(c.37.1.20,a.80.1.1)*6
1iqz_1	81	78	16	14	11	2.464	0.640	0.611	0.596	0.499	0.613	0	0	1	1	0	0	A1o	A	(d.58.1.4)*1
1ir6_1	385	370	37	25	22	20.350	0.787	0.463	0.431	0.402	0.454	0	1	0	0	0	0	A1o	A	(c.107.1.2)*1
1ire_1	862	784	51	32	29	47.328	0.836	0.553	0.448	0.493	0.511	0	0	1	0	0	0	C2o≠	C2	(b.34.4.4)*2+(d.149.1.1)*2
1is7_1	2780	2760	71	50	49	173.950	0.717	0.450	0.411	0.058	0.425	0	1	0	0	0	0	D4+	D5	(d.205.1.1)*10+(d.96.1.1)*10
1is9_1	358	354	27	24	23	14.904	0.574	0.589	0.561	0.541	0.590	0	0	1	1	0	0	A1o	A	(a.102.1.2)*1
1itx_1	419	403	34	25	23	19.550	0.708	0.553	0.505	0.456	0.545	0	0	1	1	0	0	A1m	A	(c.1.8.5,d.26.3.1)*1
1iu9_1	111	108	21	15	13	4.095	0.750	0.600	0.564	0.598	0.590	0	0	1	1	0	0	A1o	A	(c.78.2.1)*1
1iuq_1	357	331	36	26	18	16.848	0.818	0.571	0.491	0.519	0.542	0	0	1	0	0	0	A1o	A	(c.112.1.1)*1
1iv3_1	450	439	30	30	23	20.700	0.566	0.586	0.516	0.600	0.561	0	0	1	1	0	0	C3	C3	(d.79.5.1)*3
1iw0_1	207	203	29	19	18	9.918	0.784	0.569	0.515	0.631	0.553	0	0	1	1	0	0	A1o	A	(a.132.1.1)*1
1iwp_1	1754	1644	70	37	37	95.830	0.946	0.579	0.456	0.601	0.533	0	0	1	0	0	0	C2o≠	C2	(a.23.2.1)*2+(c.1.19.3)*2+(c.51.3.1)*2
1ix9_1	410	389	37	25	23	21.275	0.771	0.542	0.461	0.599	0.518	0	0	1	0	0	0	C2m=	C2	(a.2.11.1,d.44.1.1)*2
1ixc_1	1156	1094	63	38	33	79.002	0.887	0.368	0.363	0.128	0.371	0	1	0	0	0	0	C2m=	C2	(a.4.5.37,c.94.1.1)*4
1ixs_1	365	324	46	28	19	24.472	0.979	0.432	0.345	0.428	0.396	0	1	0	0	0	0	A2	A	(a.5.1.1)*1+(c.37.1.20,a.4.5.11)*1
1ixx_1	756	722	39	38	37	54.834	0.520	0.447	0.372	0.087	0.412	0	1	0	0	0	0	C3	C3	(d.169.1.1)*6
1iye_1	1824	1700	49	49	45	108.045	0.521	0.521	0.422	0.346	0.482	0	0	1	0	0	0	D3	D3	(e.17.1.1)*6
1iyw_1	862	784	69	39	23	61.893	1.113	0.104	0.086	0.105	0.096	1	0	0	0	0	0	A1m	A	(c.26.1.1,b.51.1.1,a.27.1.1,a.2.7.3)*1
1izm_1	340	320	41	21	18	15.498	1.051	0.627	0.503	0.680	0.567	0	0	1	1	0	0	C2o=	C2	(a.199.1.1)*2
1j09_1	468	424	63	22	20	27.720	1.500	0.529	0.406	0.567	0.472	0	0	1	0	0	0	A1m	A	(c.26.1.1,a.97.1.1)*1
1j0p_1	108	104	22	18	15	5.940	0.667	0.414	0.405	0.380	0.416	0	1	0	0	0	0	A1o	A	(a.138.1.1)*1
1j11_1	516	470	43	32	20	27.520	0.827	0.560	0.452	0.603	0.517	0	0	1	0	0	0	A1m	A	(c.1.8.1,b.3.1.1)*1
1j1j_1	868	743	45	44	29	57.420	0.616	0.380	0.350	0.112	0.366	0	1	0	0	0	0	C4+	C4	(a.118.16.1)*4
1j27_1	98	93	24	13	11	3.432	1.000	0.598	0.568	0.359	0.586	0	0	1	1	0	0	A1o	A	(d.58.50.1)*1
1j2j_1	206	194	26	21	19	10.374	0.650	0.602	0.491	0.673	0.557	0	0	1	0	0	0	A2	A	(a.7.8.1)*1+(c.37.1.8)*1
1j2p_1	1701	1584	65	64	23	95.680	0.747	0.457	0.413	0.283	0.442	0	1	0	0	0	0	C4+	C7	(d.153.1.4)*7
1j34_1	298	291	40	20	17	13.600	1.081	0.601	0.536	0.609	0.577	0	0	1	1	0	0	A3	A	(d.169.1.1)*2+(g.32.1.1)*1
1j3a_1	129	112	22	18	13	5.148	0.710	0.612	0.523	0.508	0.568	0	0	1	1	0	0	A1o	A	(c.21.1.1)*1
1j3i_1	1104	1047	54	51	28	77.112	0.684	0.444	0.384	0.136	0.416	0	1	0	0	0	0	C2o≠	C2	(c.71.1.1)*2+(d.117.1.1)*2
1j3w_1	535	470	36	32	22	25.344	0.667	0.525	0.449	0.345	0.497	0	0	1	0	0	0	D2	D2	(d.110.7.1)*4
1j5u_1	127	111	20	19	11	4.180	0.667	0.612	0.595	0.621	0.613	0	0	1	1	0	0	A1o	A	(d.208.1.1)*1
1j5y_1	172	152	32	17	14	7.616	1.032	0.570	0.460	0.741	0.522	0	0	1	0	0	0	A1m	A	(a.4.5.1,d.94.2.1)*1
1j8b_1	184	148	30	21	13	8.190	0.882	0.512	0.426	0.530	0.475	0	0	1	0	0	0	C2o=	C2	(d.222.1.1)*2
1j8u_1	614	604	59	28	25	41.300	1.113	0.509	0.405	0.438	0.465	0	0	1	0	0	0	C2o=	C2	(d.178.1.1)*2
1j98_1	308	300	28	24	20	13.440	0.636	0.536	0.527	0.567	0.549	0	0	1	1	0	0	C2o=	C2	(d.185.1.2)*2
1j9c_1	559	499	53	26	22	30.316	1.104	0.494	0.409	0.564	0.460	0	1	0	0	0	0	A3	A	(b.1.2.1,b.1.2.1)*1+(b.47.1.2)*1+(g.3.11.1,g.3.11.1)*1
1jat_1	284	259	39	24	16	14.976	0.975	0.554	0.426	0.630	0.498	0	0	1	0	0	0	A2	A	(d.20.1.1)*2
1jb3_1	127	123	23	16	16	5.888	0.719	0.627	0.512	0.610	0.579	0	0	1	1	0	0	A1o	A	(b.40.3.2)*1
1jbw_1	410	398	33	29	22	21.054	0.647	0.532	0.459	0.447	0.502	0	0	1	0	0	0	A1m	A	(c.72.2.2,c.59.1.2)*1
1jch_1	1104	892	128	31	27	107.136	2.207	0.318	0.227	0.528	0.287	1	0	0	0	0	1	C2m≠	C2	(b.110.1.1,h.4.9.1,b.101.1.1)*2+(d.26.2.1)*2
1jck_1	954	884	72	34	25	61.200	1.220	0.469	0.370	0.575	0.430	0	1	0	0	0	0	C2m≠	C2	(b.1.1.1,b.1.1.2)*2+(b.40.2.2,d.15.6.1)*2
1je6_1	275	255	48	22	16	16.896	1.263	0.429	0.369	0.295	0.409	0	1	0	0	0	0	A1m	A	(d.19.1.1,b.1.1.2)*1
1jeq_1	1068	952	66	35	31	71.610	1.000	0.426	0.360	0.578	0.403	0	1	0	0	0	0	A2	A	(c.62.1.3,b.131.1.1,a.140.2.1)*1+(c.62.1.4,b.131.1.2)*1
1jfb_1	399	387	32	29	21	19.488	0.640	0.488	0.471	0.330	0.489	0	1	0	0	0	0	A1o	A	(a.104.1.1)*1
1jfm_1	174	163	27	23	13	8.073	0.750	0.596	0.502	0.490	0.558	0	0	1	1	0	0	A1o	A	(d.19.1.1)*1
1jg5_1	415	388	33	32	19	20.064	0.647	0.568	0.502	0.478	0.548	0	0	1	1	0	0	C4+	C5	(d.205.1.1)*5
1jgt_1	990	937	53	37	30	58.830	0.791	0.480	0.404	0.467	0.455	0	1	0	0	0	0	C2m=	C2	(d.153.1.1,c.26.2.1)*2
1jhh_1	316	283	47	25	15	17.625	1.175	0.517	0.409	0.576	0.476	0	0	1	0	0	0	A2	A	(a.4.5.2,b.87.1.1)*1+(b.87.1.1)*1
1jhn_1	380	326	58	34	21	41.412	1.055	0.153	0.172	0.027	0.164	1	0	0	0	1	0	A1m	A	(b.29.1.12,b.104.1.1)*1
1jig_1	1752	1752	46	46	46	97.336	0.500	0.115	0.389	0.000	0.273	1	0	0	0	1	0	TOI	T	(a.25.1.1)*12
1jiw_1	575	516	48	29	21	29.232	0.960	0.569	0.438	0.521	0.512	0	0	1	0	0	0	A2	A	(b.61.2.1)*1+(d.92.1.6,b.80.7.1)*1
1jk9_1	396	351	34	28	21	19.992	0.694	0.523	0.427	0.480	0.482	0	0	1	0	0	0	A2	A	(b.1.8.1)*1+(d.58.17.1,b.1.8.1)*1
1jl9_1	87	78	32	13	9	3.744	1.455	0.650	0.511	0.602	0.589	0	0	1	1	0	0	C2o=	C2	(g.3.11.1)*2
1jm1_1	202	200	23	22	17	8.602	0.590	0.617	0.539	0.684	0.593	0	0	1	1	0	0	A1o	A	(b.33.1.1)*1
1jmm_1	377	337	34	28	17	16.184	0.756	0.553	0.492	0.502	0.532	0	0	1	0	0	0	A1o	A	(b.30.6.1)*1
1jnr_1	1582	1546	61	36	35	76.860	0.859	0.571	0.523	0.492	0.560	0	0	1	1	0	0	C2m≠	C2	(c.3.1.4,d.168.1.1,a.7.3.1)*2+(d.58.1.5)*2
1jo0_1	97	96	22	16	13	4.576	0.759	0.584	0.504	0.707	0.563	0	0	1	1	0	0	A1o	A	(d.68.4.1)*1
1jof_1	1460	1337	61	57	31	107.787	0.693	0.471	0.343	0.212	0.406	0	1	0	0	0	0	D2	D2	(b.69.10.1)*4
1jov_1	269	260	29	23	19	12.673	0.690	0.609	0.518	0.654	0.572	0	0	1	1	0	0	A1o	A	(b.30.5.7)*1
1jq5_1	2928	2920	69	68	44	206.448	0.616	0.363	0.348	0.004	0.348	0	1	0	0	0	0	D4+	D4	(e.22.1.2)*8
1jqj_1	694	654	53	44	25	58.300	0.768	0.308	0.291	0.097	0.301	1	0	0	0	0	0	A2	A	(c.37.1.20,a.80.1.1)*1+(d.131.1.1,d.131.1.1,d.131.1.1)*1
1jql_1	506	479	47	36	23	38.916	0.797	0.397	0.318	0.474	0.360	0	1	0	0	0	0	A2	A	(c.37.1.20)*1+(d.131.1.1,d.131.1.1,d.131.1.1)*1
1jqp_1	1392	1364	47	45	42	88.830	0.540	0.445	0.415	0.008	0.422	0	1	0	0	0	0	D2	D2	(b.61.5.1,d.3.1.1)*4
1jr3_1	1769	1707	63	47	45	133.245	0.685	0.274	0.312	0.103	0.293	1	0	0	0	1	0	A4+	A	(c.37.1.20,a.80.1.1)*5
1jr7_1	1224	1124	56	55	25	77.000	0.700	0.346	0.374	0.199	0.362	0	1	0	0	1	0	C4+	C4	(b.82.2.3)*4
1jro_1	2420	2313	89	49	33	143.913	1.085	0.491	0.409	0.373	0.461	0	1	0	0	0	0	C2m≠	C2	(d.15.4.2,a.56.1.1,d.145.1.3,d.87.2.1)*2+(d.41.1.1,d.133.1.1)*2
1js0_1	372	365	41	41	14	23.534	0.745	0.474	0.387	0.449	0.444	0	1	0	0	0	0	C3	C3	(d.5.1.1)*3
1jsg_1	222	198	33	20	18	11.880	0.868	0.560	0.469	0.488	0.529	0	0	1	0	0	0	C2o=	C2	(b.63.1.1)*2
1jst_1	1112	1043	59	44	28	72.688	0.819	0.440	0.386	0.122	0.416	0	1	0	0	0	0	C2m≠	C2	(a.74.1.1,a.74.1.1)*2+(d.144.1.7)*2
1jtd_1	535	523	42	27	23	26.082	0.840	0.533	0.469	0.465	0.511	0	0	1	0	0	0	A2	A	(b.69.5.2)*1+(e.3.1.1)*1
1jva_2	430	369	45	25	19	21.375	1.023	0.556	0.455	0.642	0.518	0	0	1	0	0	0	A1m	A	(b.86.1.2,d.95.2.2,d.95.2.2)*1
1jvn_1	537	484	38	27	25	25.650	0.731	0.582	0.499	0.529	0.554	0	0	1	0	0	0	A1m	A	(c.23.16.1,c.1.2.1)*1
1jw9_1	642	596	34	33	29	32.538	0.548	0.583	0.469	0.567	0.537	0	0	1	0	0	0	C2o≠	C2	(c.111.1.1)*2+(d.15.3.1)*2
1jwh_1	1075	920	95	33	25	78.375	1.638	0.405	0.327	0.264	0.378	0	1	0	0	0	0	C2o≠	C2	(d.144.1.7)*2+(g.41.4.1)*2
1jwy_1	1039	980	90	31	25	69.750	1.607	0.447	0.377	0.509	0.419	0	1	0	0	0	0	A1m	A	(c.37.1.9,b.34.3.1,c.37.1.8)*1
1jx7_1	702	702	40	29	28	32.480	0.702	0.494	0.505	0.048	0.498	0	1	0	0	1	0	D3	D3	(c.114.1.1)*6
1jyh_1	155	142	27	19	14	7.182	0.818	0.587	0.498	0.671	0.561	0	0	1	0	0	0	A1o	A	(d.60.1.3)*1
1jyo_1	726	696	78	26	21	42.588	1.660	0.503	0.415	0.566	0.469	0	0	1	0	0	0	C2o≠	C2	(d.184.1.2)*2+(d.198.1.1)*4
1jzd_1	551	533	43	34	24	35.088	0.741	0.409	0.379	0.077	0.393	0	1	0	0	0	0	A3	A	(b.1.17.1)*1+(d.17.3.1,c.47.1.9)*2
1jzt_1	243	230	26	21	20	10.920	0.634	0.589	0.519	0.612	0.567	0	0	1	1	0	0	A1o	A	(c.104.1.1)*1
1k04_1	284	244	42	26	17	18.564	0.977	0.362	0.321	0.249	0.353	0	1	0	0	0	0	C2o=	C2	(a.24.14.1)*2
1k0r_1	326	286	57	22	20	25.080	1.357	0.347	0.273	0.595	0.324	1	0	0	0	0	0	A1m	A	(d.202.1.1,b.40.4.5,d.52.3.1,d.52.3.1)*1
1k1f_1	267	251	38	21	19	15.162	0.950	0.569	0.445	0.394	0.515	0	0	1	0	0	0	D2	D2	(a.147.1.1)*4
1k20_1	620	610	44	29	24	30.624	0.830	0.531	0.459	0.538	0.507	0	0	1	0	0	0	C2o=	C2	(c.107.1.1)*2
1k24_1	249	243	43	18	15	11.610	1.303	0.471	0.475	0.131	0.476	0	1	0	0	1	0	A1o	A	(f.4.4.2)*1
1k28_1	2763	2634	113	43	43	208.937	1.314	0.444	0.335	0.420	0.400	0	1	0	0	0	0	C3	C3	(b.106.1.1,b.106.1.1)*3+(b.40.8.1,d.2.1.3,b.108.1.2)*3
1k32_1	6138	6122	94	93	48	419.616	0.667	0.292	0.372	0.048	0.345	1	0	0	0	1	0	D3	D3	(b.68.7.1,b.69.9.1,c.14.1.2,b.36.1.3)*6
1k3i_1	651	607	44	28	25	30.800	0.830	0.580	0.490	0.606	0.545	0	0	1	0	0	0	A1m	A	(b.18.1.1,b.69.1.1,b.1.18.2)*1
1k3s_1	215	204	29	22	15	9.570	0.784	0.535	0.490	0.340	0.520	0	0	1	0	0	0	C2o=	C2	(d.198.1.1)*2
1k40_1	126	124	35	12	10	4.200	1.591	0.568	0.573	0.535	0.583	0	0	1	1	1	0	A1o	A	(a.24.14.1)*1
1k46_1	124	112	29	18	12	6.264	0.967	0.527	0.403	0.719	0.478	0	0	1	0	0	0	A1o	A	(d.195.1.1)*1
1k4n_1	183	173	25	20	16	8.000	0.694	0.579	0.514	0.653	0.564	0	0	1	1	0	0	A1o	A	(d.32.1.5)*1
1k4z_1	314	262	43	23	15	14.835	1.132	0.522	0.434	0.534	0.488	0	0	1	0	0	0	C2o=	C2	(b.80.5.1)*2
1k5c_1	333	324	34	23	18	14.076	0.829	0.576	0.505	0.665	0.551	0	0	1	1	0	0	A1o	A	(b.80.1.3)*1
1k5d_1	696	651	55	32	28	49.280	0.917	0.454	0.348	0.418	0.409	0	1	0	0	0	0	A3	A	(b.55.1.3)*1+(c.10.1.2)*1+(c.37.1.8)*1
1k6m_1	864	826	47	45	31	65.565	0.618	0.496	0.358	0.396	0.431	0	1	0	0	0	0	C2m=	C2	(c.37.1.7,c.60.1.4)*2
1k6w_1	2538	2442	63	63	45	178.605	0.583	0.458	0.369	0.239	0.419	0	1	0	0	0	0	D3	D3	(b.92.1.2,c.1.9.5)*6
1k6y_1	766	697	53	30	27	42.930	0.930	0.428	0.394	0.489	0.417	0	1	0	0	0	0	C2m=	C2	(a.4.10.1,c.55.3.2)*4
1k7j_1	206	204	27	18	18	8.748	0.750	0.595	0.546	0.569	0.585	0	0	1	1	0	0	A1o	A	(d.115.1.1)*1
1k8t_1	498	438	50	29	22	31.900	0.980	0.387	0.361	0.238	0.383	0	1	0	0	0	0	A1o	A	(e.41.1.1)*1
1k92_1	1776	1632	57	46	37	97.014	0.687	0.542	0.450	0.302	0.502	0	0	1	0	0	0	D2	D2	(c.26.2.1,d.210.1.1)*4
1k93_3	646	577	60	30	23	41.400	1.132	0.433	0.373	0.549	0.413	0	1	0	0	0	0	A2	A	(a.39.1.5)*1+(e.41.1.1)*1
1k9o_1	599	572	62	25	21	32.550	1.348	0.512	0.422	0.540	0.476	0	0	1	0	0	0	A2	A	(b.47.1.2)*1+(e.1.1.1)*1
1ka1_1	354	349	33	23	21	15.939	0.750	0.591	0.528	0.637	0.572	0	0	1	1	0	0	A1o	A	(e.7.1.1)*1
1ka9_1	446	440	37	24	23	20.424	0.787	0.553	0.499	0.459	0.533	0	0	1	0	0	0	A2	A	(c.1.2.1)*1+(c.23.16.1)*1
1kac_1	927	834	47	46	25	54.050	0.662	0.590	0.405	0.453	0.495	0	0	1	0	0	0	C3	C3	(b.1.1.1)*3+(b.21.1.1)*3
1kaf_1	108	106	19	16	15	4.560	0.613	0.606	0.543	0.668	0.589	0	0	1	1	0	0	A1o	A	(d.199.1.1)*1
1kb0_1	670	641	38	32	27	32.832	0.644	0.583	0.500	0.511	0.552	0	0	1	1	0	0	A1m	A	(b.70.1.1,a.3.1.6)*1
1kbi_1	1818	1700	61	52	32	101.504	0.726	0.507	0.436	0.290	0.482	0	0	1	0	0	0	C4+	C4	(c.1.4.1)*2+(d.120.1.1,c.1.4.1)*2
1kbp_1	1696	1672	66	44	43	124.872	0.759	0.374	0.350	0.022	0.355	0	1	0	0	0	0	D2	D2	(b.1.12.1,d.159.1.1)*4
1kcf_1	468	425	47	27	19	24.111	1.022	0.540	0.447	0.682	0.502	0	0	1	0	0	0	C2m=	C2	(a.140.2.1,c.55.3.7)*2
1kfq_1	1142	1029	67	32	30	64.320	1.081	0.496	0.415	0.544	0.465	0	1	0	0	0	0	C2m=	C2	(c.84.1.1,c.84.1.1,c.84.1.1,d.129.2.1)*2
1kfu_1	883	840	64	37	23	54.464	1.067	0.503	0.421	0.468	0.473	0	0	1	0	0	0	A2	A	(a.39.1.8)*1+(d.3.1.3,b.14.1.1,a.39.1.8)*1
1kgs_1	219	203	40	17	17	11.560	1.176	0.527	0.450	0.525	0.502	0	0	1	0	0	0	A1m	A	(c.23.1.1,a.4.6.1)*1
1kgy_1	638	606	45	34	25	38.250	0.763	0.418	0.402	0.118	0.407	0	1	0	0	0	0	C2o≠	C2	(b.18.1.4)*2+(b.6.1.5)*2
1ki0_1	253	233	39	26	15	15.210	0.951	0.384	0.365	0.160	0.368	0	1	0	0	0	0	A1m	A	(g.14.1.1,g.14.1.1,g.14.1.1)*1
1kig_1	352	320	36	24	19	16.416	0.837	0.580	0.496	0.592	0.555	0	0	1	0	0	0	A3	A	(b.47.1.2)*1+(g.3.11.1)*1+(g.8.1.2)*1
1kjn_1	304	283	38	20	18	13.680	1.000	0.598	0.521	0.555	0.572	0	0	1	1	0	0	C2o=	C2	(c.115.1.1)*2
1kjq_1	773	753	55	28	26	40.040	1.019	0.530	0.472	0.540	0.515	0	0	1	0	0	0	C2m=	C2	(c.30.1.1,d.142.1.2,b.84.2.1)*2
1kjw_1	292	263	38	22	20	16.720	0.905	0.505	0.400	0.569	0.459	0	0	1	0	0	0	A1m	A	(b.34.2.1,c.37.1.1)*1
1kk8_1	1086	962	96	35	28	94.080	1.524	0.329	0.277	0.102	0.306	1	0	0	0	0	0	A3	A	(a.39.1.5)*2+(c.37.1.9,b.34.3.1)*1
1kkm_1	1578	1404	54	43	43	99.846	0.628	0.522	0.372	0.182	0.444	0	0	1	0	0	0	D3	D3	(c.91.1.2)*6+(d.94.1.1)*6
1kl9_1	168	161	28	18	14	7.056	0.875	0.608	0.506	0.655	0.561	0	0	1	1	0	0	A1m	A	(b.40.4.5,a.60.14.1)*1
1klf_1	484	420	57	29	18	29.754	1.213	0.470	0.350	0.429	0.417	0	1	0	0	0	0	A2	A	(b.1.11.1,b.7.2.1)*1+(b.2.3.2,b.2.3.2)*1
1klo_1	648	484	40	35	32	44.800	0.597	0.483	0.293	0.195	0.384	1	0	0	0	0	0	D2	D2	(g.3.11.2,g.3.11.2,g.3.11.2)*4
1knc_1	521	518	33	32	23	24.288	0.600	0.562	0.512	0.188	0.542	0	0	1	1	0	0	C3	C3	(a.152.1.1)*3
1knr_1	529	499	36	30	24	25.920	0.667	0.555	0.486	0.521	0.530	0	0	1	0	0	0	A1m	A	(c.3.1.4,d.168.1.1,a.7.3.1)*1
1knx_1	1827	1677	71	65	31	143.065	0.740	0.427	0.326	0.262	0.390	0	1	0	0	0	0	D3	D3	(c.98.2.1,c.91.1.2)*6
1kny_1	506	500	35	30	28	29.400	0.603	0.351	0.406	0.022	0.370	0	1	0	0	1	0	C2m=	C2	(d.218.1.1,a.24.16.1)*2
1koa_1	894	846	44	37	33	53.724	0.629	0.496	0.422	0.302	0.463	0	1	0	0	0	0	C2m=	C2	(d.144.1.7,b.1.1.4)*2
1kol_1	1584	1540	47	47	42	92.778	0.528	0.497	0.419	0.086	0.454	0	1	0	0	0	0	D2	D2	(b.35.1.2,c.2.1.1)*4
1kpt_1	210	201	32	19	15	9.120	0.941	0.579	0.497	0.655	0.553	0	0	1	0	0	0	C2o=	C2	(d.70.1.1)*2
1kq5_1	156	131	27	17	13	5.967	0.900	0.601	0.518	0.614	0.568	0	0	1	1	0	0	A1o	A	(b.80.5.1)*1
1kq6_1	140	134	27	21	13	7.371	0.794	0.596	0.482	0.430	0.551	0	0	1	0	0	0	A1o	A	(d.189.1.1)*1
1kqf_1	4461	4023	71	67	67	318.719	0.530	0.458	0.351	0.297	0.409	0	1	0	0	0	0	C3	C3	(c.81.1.1,b.52.2.2)*3+(d.58.1.5,f.23.22.1)*3+(f.21.1.1)*3
1kqp_1	542	512	35	27	27	25.515	0.648	0.495	0.477	0.559	0.497	0	1	0	0	0	0	C2o=	C2	(c.26.2.1)*2
1krh_1	337	329	35	26	19	17.290	0.778	0.554	0.457	0.516	0.515	0	0	1	0	0	0	A1m	A	(d.15.4.2,b.43.4.2,c.25.1.2)*1
1ks2_1	436	412	48	24	18	20.736	1.143	0.568	0.481	0.455	0.539	0	0	1	0	0	0	C2m=	C2	(c.124.1.4,d.58.40.1)*2
1ksk_1	234	216	44	20	14	12.320	1.294	0.465	0.407	0.565	0.449	0	1	0	0	0	0	A1m	A	(d.66.1.5,d.265.1.3)*1
1kt1_1	374	305	47	26	21	25.662	1.000	0.384	0.308	0.301	0.352	0	1	0	0	0	0	A1m	A	(d.26.1.1,d.26.1.1,a.118.8.1)*1
1ku2_1	480	417	37	33	26	31.746	0.627	0.512	0.377	0.536	0.460	0	0	1	0	0	0	C2m=	C2	(a.177.1.1,a.4.13.1)*2
1ku6_1	596	556	37	33	25	30.525	0.638	0.587	0.485	0.559	0.548	0	0	1	0	0	0	A2	A	(c.69.1.1)*1+(g.7.1.1)*1
1kwg_1	1932	1902	56	55	40	123.200	0.589	0.395	0.406	0.011	0.394	0	1	0	0	1	0	C3	C3	(c.1.8.1,c.23.16.5,b.71.1.1)*3
1kwm_1	402	393	35	25	22	19.250	0.745	0.576	0.518	0.543	0.556	0	0	1	1	0	0	A1m	A	(d.58.3.1,c.56.5.1)*1
1kxq_1	616	589	47	30	23	32.430	0.887	0.569	0.469	0.479	0.524	0	0	1	0	0	0	A2	A	(b.1.1.1)*1+(c.1.8.1,b.71.1.1)*1
1ky9_1	1866	1728	54	53	53	151.686	0.509	0.262	0.270	0.065	0.269	1	0	0	0	1	0	D3	D3	(b.47.1.1,b.36.1.4)*6
1ky9_2	2376	2334	61	60	51	186.660	0.550	0.289	0.303	0.068	0.300	1	0	0	0	1	0	D3	D3	(b.47.1.1,b.36.1.4,b.36.1.4)*6
1kyo_1	4460	3840	101	63	59	375.417	0.828	0.363	0.289	0.306	0.333	1	0	0	0	0	0	A4+	A	(a.3.1.1)*1+(a.3.1.3,f.23.11.1)*2+(b.1.1.1)*4+(d.185.1.1,d.185.1.1)*4+(f.21.1.2,f.32.1.1)*2+(f.23.12.1,b.33.1.1)*2+(f.23.13.1)*2+(f.23.14.1)*2+(f.27.1.1)*2+(f.28.1.1)*2
1kyq_1	535	490	41	37	26	39.442	0.651	0.470	0.343	0.584	0.411	0	1	0	0	0	0	C2m=	C2	(c.2.1.11,e.37.1.1)*2
1kz7_1	525	475	38	31	29	34.162	0.633	0.476	0.379	0.538	0.434	0	1	0	0	0	0	A2	A	(a.87.1.1,b.55.1.1)*1+(c.37.1.8)*1
1kzq_1	506	438	43	30	25	32.250	0.782	0.445	0.328	0.333	0.390	0	1	0	0	0	0	C2m=	C2	(b.6.2.1,b.6.2.1)*2
1kzy_1	854	809	52	47	28	68.432	0.693	0.371	0.318	0.109	0.347	0	1	0	0	0	0	A4+	A	(b.2.5.2)*2+(c.15.1.4,c.15.1.4)*2
1l0n_1	2097	1834	98	42	35	144.060	1.273	0.412	0.345	0.505	0.397	0	1	0	0	0	0	A4+	A	(a.3.1.3,f.23.11.1)*1+(d.184.1.3)*1+(d.185.1.1,d.185.1.1)*2+(f.21.1.2,f.32.1.1)*1+(f.23.12.1,b.33.1.1)*1+(f.23.13.1)*1+(f.23.14.1)*1+(f.23.15.1)*1+(f.27.1.1)*1+(f.28.1.1)*1
1l0o_1	339	317	34	24	22	17.952	0.739	0.590	0.442	0.577	0.524	0	0	1	0	0	0	A3	A	(a.4.13.2)*1+(d.122.1.3)*2
1l0s_1	88	87	18	14	12	3.024	0.692	0.613	0.567	0.618	0.595	0	0	1	1	0	0	A1o	A	(b.81.2.1)*1
1l0w_1	1160	1003	68	42	26	74.256	1.000	0.491	0.379	0.428	0.443	0	1	0	0	0	0	C2m=	C2	(b.40.4.1,d.104.1.1,d.74.4.1)*2
1l1l_1	717	680	43	35	28	42.140	0.683	0.485	0.418	0.352	0.463	0	1	0	0	0	0	A1o	A	(c.7.1.4)*1
1l2p_1	61	57	58	5	4	1.160	6.444	0.821	0.718	0.918	0.785	0	0	1	1	0	1	A1o	A	(f.23.21.1)*1
1l2w_1	296	287	33	23	19	14.421	0.786	0.582	0.489	0.405	0.541	0	0	1	0	0	0	A3	A	(d.184.1.2)*1+(d.198.1.1)*2
1l3p_1	204	192	35	16	14	7.840	1.167	0.551	0.513	0.572	0.542	0	0	1	1	0	0	C2o=	C2	(a.24.17.1)*2
1l3w_1	540	427	125	33	15	61.875	2.604	0.162	0.165	0.016	0.164	1	0	0	0	1	1	A1m	A	(b.1.6.1,b.1.6.1,b.1.6.1,b.1.6.1,b.1.6.1)*1
1l4d_1	361	319	37	26	17	16.354	0.860	0.552	0.473	0.639	0.524	0	0	1	0	0	0	A2	A	(b.47.1.2)*1+(d.15.5.1)*1
1l5j_1	862	809	48	33	30	47.520	0.762	0.538	0.438	0.513	0.498	0	0	1	0	0	0	A1m	A	(a.118.15.1,c.8.2.1,c.83.1.1)*1
1l6j_1	405	379	42	28	19	22.344	0.894	0.512	0.406	0.642	0.467	0	0	1	0	0	0	A1m	A	(a.20.1.2,d.92.1.11,g.14.1.2,g.14.1.2,g.14.1.2)*1
1l6s_1	2584	2544	56	55	53	163.240	0.519	0.459	0.408	0.120	0.440	0	1	0	0	0	0	D4+	D4	(c.1.10.3)*8
1l7a_1	1908	1908	56	55	38	117.040	0.602	0.401	0.420	0.020	0.405	0	1	0	0	1	0	D3	D3	(c.69.1.25)*6
1l7r_1	573	556	42	30	21	26.460	0.824	0.576	0.515	0.573	0.555	0	0	1	1	0	0	A1m	A	(c.69.1.21,b.18.1.13)*1
1l8w_4	300	284	45	18	16	12.960	1.324	0.581	0.489	0.511	0.548	0	0	1	0	0	0	A1o	A	(a.154.1.1)*1
1l9b_1	918	866	60	37	27	59.940	0.938	0.447	0.380	0.492	0.419	0	1	0	0	0	0	A4+	A	(a.3.1.1)*1+(f.23.10.1,b.41.1.1)*1+(f.26.1.1)*2
1l9l_1	74	72	18	16	10	2.880	0.692	0.629	0.561	0.620	0.600	0	0	1	1	0	0	A1o	A	(a.64.1.1)*1
1l9v_1	2504	2504	64	63	55	221.760	0.542	0.177	0.275	0.000	0.224	1	0	0	0	1	0	D4+	D4	(d.216.1.1,d.13.2.1)*8
1lam_1	2904	2850	65	64	46	191.360	0.591	0.438	0.387	0.066	0.407	0	1	0	0	0	0	D3	D3	(c.50.1.1,c.56.5.3)*6
1lb4_1	155	144	29	19	15	8.265	0.853	0.586	0.475	0.560	0.539	0	0	1	0	0	0	A1o	A	(b.8.1.1)*1
1lbu_1	213	212	27	21	17	9.639	0.711	0.583	0.497	0.571	0.549	0	0	1	0	0	0	A1m	A	(a.20.1.1,d.65.1.1)*1
1lc0_1	290	278	36	22	19	15.048	0.878	0.547	0.470	0.606	0.522	0	0	1	0	0	0	A1m	A	(c.2.1.3,d.81.1.4)*1
1ldd_1	296	280	30	28	18	15.120	0.652	0.540	0.458	0.122	0.486	0	0	1	0	0	0	D2	D2	(a.4.5.34)*4
1ldj_1	813	674	90	34	23	70.380	1.579	0.345	0.266	0.420	0.314	1	0	0	0	0	0	A2	A	(a.118.17.1,e.40.1.1,a.4.5.34)*1+(g.44.1.1)*1
1ldk_1	971	837	101	40	28	113.120	1.485	0.202	0.195	0.072	0.204	1	0	0	0	0	0	A4+	A	(a.118.17.1)*1+(a.158.1.1)*1+(d.42.1.1,a.157.1.1)*1+(e.40.1.1,a.4.5.34)*1+(g.44.1.1)*1
1leh_1	2912	2796	64	61	61	238.144	0.525	0.426	0.309	0.076	0.360	0	1	0	0	0	0	D4+	D4	(c.58.1.1,c.2.1.7)*8
1lf6_1	674	656	50	28	24	33.600	0.962	0.572	0.500	0.611	0.551	0	0	1	1	0	0	A1m	A	(b.30.5.5,a.102.1.5)*1
1lfp_1	243	240	30	25	17	12.750	0.714	0.487	0.450	0.313	0.472	0	1	0	0	0	0	A1o	A	(e.39.1.1)*1
1lfw_1	468	447	43	25	21	22.575	0.935	0.561	0.494	0.600	0.538	0	0	1	0	0	0	A1m	A	(c.56.5.4,d.58.19.1)*1
1lg7_1	164	155	27	18	14	6.804	0.844	0.621	0.553	0.781	0.601	0	0	1	1	0	0	A1o	A	(d.213.1.1)*1
1lgh_1	792	792	42	39	39	63.882	0.538	0.294	0.284	0.012	0.273	1	0	0	0	0	0	A4+	A	(f.3.1.1)*16
1lgp_1	226	206	34	25	14	11.900	0.872	0.486	0.424	0.576	0.470	0	1	0	0	0	0	C2o=	C2	(b.26.1.2)*2
1li4_1	1720	1680	55	52	33	94.380	0.647	0.547	0.463	0.299	0.513	0	0	1	0	0	0	D2	D2	(c.23.12.3,c.2.1.4)*4
1lk5_1	916	863	41	38	35	54.530	0.562	0.549	0.408	0.295	0.472	0	0	1	0	0	0	D2	D2	(c.124.1.4,d.58.40.1)*4
1lkt_1	312	312	32	31	18	17.856	0.653	0.486	0.437	0.252	0.472	0	1	0	0	0	0	C3	C3	(b.90.1.1)*3
1lky_1	462	399	44	43	18	34.056	0.721	0.511	0.345	0.536	0.434	0	0	1	0	0	0	A4+	A	(a.60.1.1)*6
1ll1_1	3540	3426	67	66	59	260.898	0.536	0.419	0.366	0.137	0.395	0	1	0	0	0	0	D3	D3	(a.85.1.1,a.86.1.1,b.1.18.3)*6
1lmi_1	131	125	24	18	11	4.752	0.828	0.607	0.555	0.674	0.595	0	0	1	1	0	0	A1o	A	(b.1.19.1)*1
1lnl_1	2448	2358	74	52	49	188.552	0.733	0.325	0.325	0.114	0.329	0	1	0	0	1	0	C2m=	C2	(a.86.1.1,b.112.1.1)*6
1lnq_1	2408	2200	69	60	60	248.400	0.575	0.319	0.221	0.016	0.258	1	0	0	0	0	0	D4+	D4	(f.14.1.1,c.2.1.9,d.286.1.1)*8
1lns_1	1526	1428	55	45	41	101.475	0.640	0.404	0.384	0.168	0.404	0	1	0	0	0	0	C2m=	C2	(a.40.2.1,c.69.1.21,b.18.1.13)*2
1lnz_1	342	290	58	21	15	18.270	1.611	0.532	0.406	0.460	0.478	0	0	1	0	0	0	A1m	A	(b.117.1.1,c.37.1.8)*1
1lou_1	97	91	22	14	12	3.696	0.846	0.561	0.528	0.693	0.554	0	0	1	1	0	0	A1o	A	(d.58.14.1)*1
1lpb_1	534	490	53	25	22	29.150	1.128	0.507	0.432	0.563	0.487	0	0	1	0	0	0	A2	A	(c.69.1.19,b.12.1.2)*1+(g.3.10.1,g.3.10.1)*1
1lqt_2	454	431	43	27	21	24.381	0.896	0.525	0.441	0.359	0.487	0	0	1	0	0	0	A1m	A	(c.4.1.1,c.3.1.1)*1
1lqv_2	206	187	32	19	17	10.336	0.889	0.535	0.465	0.263	0.502	0	0	1	0	0	0	A2	A	(d.19.1.1)*1+(g.32.1.1)*1
1lr0_1	126	109	27	15	13	5.265	0.964	0.516	0.451	0.585	0.496	0	0	1	0	0	0	A1o	A	(d.212.1.1)*1
1lr7_1	73	65	27	12	8	2.592	1.350	0.638	0.483	0.596	0.564	0	0	1	0	0	0	A1m	A	(g.3.11.3,g.68.1.1)*1
1lri_1	98	98	20	15	13	3.900	0.714	0.429	0.487	0.069	0.453	0	1	0	0	1	0	A1o	A	(a.134.1.1)*1
1lrz_1	400	353	49	22	19	20.482	1.195	0.565	0.461	0.649	0.522	0	0	1	0	0	0	A1m	A	(d.108.1.4,d.108.1.4,a.2.7.4)*1
1lsh_1	1129	1090	63	42	38	100.548	0.787	0.340	0.286	0.218	0.316	1	0	0	0	0	0	A2	A	(f.7.1.1)*1+(f.7.1.1,a.118.4.1,f.7.1.1)*1
1lsl_1	113	97	59	13	8	6.136	2.810	0.301	0.323	0.038	0.312	0	1	0	0	1	1	A1m	A	(g.60.1.1,g.60.1.1)*1
1ltq_1	1192	1140	69	40	33	91.080	0.945	0.329	0.309	0.170	0.319	0	1	0	0	0	0	D2	D2	(c.37.1.1,c.108.1.9)*4
1lu9_1	861	786	54	52	18	50.544	0.771	0.532	0.385	0.435	0.465	0	0	1	0	0	0	C3	C3	(c.58.1.4,c.2.1.7)*3
1luj_1	572	515	75	20	19	28.500	1.923	0.519	0.429	0.640	0.488	0	0	1	0	0	0	A2	A	(a.118.1.1)*1+(a.161.1.1)*1
1lva_1	258	239	49	23	14	15.778	1.324	0.379	0.366	0.350	0.380	0	1	0	0	0	0	A1m	A	(a.4.5.35,a.4.5.35,a.4.5.35,a.4.5.35)*1
1lw7_1	1376	1372	52	45	39	91.260	0.619	0.388	0.395	0.047	0.395	0	1	0	0	1	0	D2	D2	(c.26.1.3,c.37.1.1)*4
1lxj_1	416	404	26	26	25	16.900	0.510	0.541	0.536	0.559	0.552	0	0	1	1	0	0	D2	D2	(d.58.48.1)*4
1lxn_1	99	91	27	14	11	4.158	1.080	0.571	0.491	0.463	0.537	0	0	1	0	0	0	A1o	A	(d.58.48.1)*1
1m0w_1	960	890	63	36	23	52.164	1.068	0.540	0.458	0.557	0.512	0	0	1	0	0	0	C2m=	C2	(d.142.1.6,c.30.1.4)*2
1m15_1	356	345	34	25	21	17.850	0.739	0.554	0.490	0.429	0.534	0	0	1	0	0	0	A1m	A	(a.83.1.1,d.128.1.2)*1
1m1g_3	244	226	37	35	15	19.425	0.740	0.350	0.284	0.416	0.324	1	0	0	0	0	0	A1m	A	(d.58.42.1,b.114.1.1,b.34.5.4)*1
1m1h_1	182	170	36	18	14	9.072	1.125	0.514	0.442	0.593	0.486	0	0	1	0	0	0	A1m	A	(d.58.42.1,b.114.1.1)*1
1m1l_1	940	842	50	40	31	62.000	0.704	0.417	0.359	0.070	0.386	0	1	0	0	0	0	C2o=	C2	(d.260.1.1)*4
1m1z_2	490	453	35	29	22	22.330	0.686	0.561	0.483	0.620	0.532	0	0	1	0	0	0	A1m	A	(d.153.1.1,c.26.2.1)*1
1m22_2	487	466	31	30	23	21.390	0.585	0.590	0.515	0.680	0.564	0	0	1	1	0	0	A1o	A	(c.117.1.1)*1
1m2k_1	249	238	33	19	18	11.286	0.892	0.536	0.503	0.615	0.537	0	0	1	1	0	0	A1o	A	(c.31.1.5)*1
1m2o_1	1758	1516	92	45	27	111.780	1.278	0.472	0.372	0.387	0.434	0	1	0	0	0	0	C2m≠	C2	(b.2.8.1,g.41.10.1,c.62.1.2,a.71.2.1,d.109.2.1)*2+(c.37.1.8)*2
1m2t_1	510	493	46	28	21	27.048	0.939	0.555	0.457	0.615	0.514	0	0	1	0	0	0	A2	A	(b.42.2.1,b.42.2.1)*1+(d.165.1.1)*1
1m4y_1	2052	2052	53	52	48	132.288	0.530	0.180	0.349	0.000	0.276	1	0	0	0	1	0	D4+	D6	(d.153.1.4)*12
1m56_1	1114	1067	54	42	29	65.772	0.761	0.538	0.442	0.501	0.503	0	0	1	0	0	0	A4+	A	(f.17.2.1,b.6.1.2)*1+(f.23.8.1)*1+(f.24.1.1)*1+(f.25.1.1)*1
1m6n_1	1604	1544	64	54	36	124.416	0.711	0.417	0.336	0.326	0.384	0	1	0	0	0	0	C2m=	C2	(c.37.1.19,a.162.1.1,c.37.1.19,a.172.1.1)*2
1m6y_1	293	285	33	22	19	13.794	0.805	0.546	0.513	0.488	0.536	0	0	1	1	0	0	A1m	A	(c.66.1.23,a.60.13.1)*1
1m70_1	190	185	28	19	15	7.980	0.824	0.520	0.504	0.192	0.520	0	0	1	1	0	0	A1m	A	(a.3.1.4,a.3.1.4)*1
1m9i_1	664	597	48	32	28	43.008	0.800	0.497	0.375	0.520	0.442	0	1	0	0	0	0	A1m	A	(a.65.1.1,a.65.1.1)*1
1m9s_1	523	469	119	33	17	66.759	2.380	0.114	0.161	0.001	0.136	1	0	0	0	1	1	A1m	A	(c.10.2.1,b.1.18.15,b.34.11.1,b.34.11.1,b.34.11.1)*1
1m9x_2	310	289	49	21	16	16.464	1.324	0.514	0.437	0.393	0.486	0	0	1	0	0	0	A2	A	(a.73.1.1)*1+(b.62.1.1)*1
1ma9_1	799	697	52	33	30	51.480	0.825	0.508	0.368	0.546	0.447	0	0	1	0	0	0	A2	A	(a.126.1.1,a.126.1.1,a.126.1.1)*1+(c.55.1.1,c.55.1.1)*1
1mby_1	150	142	32	18	12	6.912	1.067	0.449	0.456	0.075	0.446	0	1	0	0	1	0	C2o=	C2	(d.223.1.1)*2
1mc2_1	122	117	23	19	11	4.807	0.767	0.620	0.550	0.685	0.595	0	0	1	1	0	0	A1o	A	(a.133.1.2)*1
1mda_1	1184	1059	54	39	30	63.180	0.783	0.514	0.411	0.418	0.470	0	0	1	0	0	0	C2o≠	C2	(b.6.1.1)*2+(b.69.2.1)*2+(g.21.1.1)*2
1mdu_1	1455	1339	78	52	35	141.960	0.897	0.319	0.249	0.263	0.286	1	0	0	0	0	0	A4+	A	(c.55.1.1,c.55.1.1)*3+(d.109.1.1)*3
1mgt_1	169	167	23	21	15	7.245	0.639	0.569	0.538	0.650	0.573	0	0	1	1	0	0	A1m	A	(c.55.7.1,a.4.2.1)*1
1mh3_1	421	390	36	30	19	20.520	0.735	0.549	0.475	0.392	0.522	0	0	1	0	0	0	A1m	A	(c.94.1.1,a.4.1.1)*1
1mhh_1	497	473	41	36	21	30.996	0.719	0.443	0.382	0.219	0.415	0	1	0	0	0	0	A3	A	(b.1.1.1,b.1.1.2)*2+(d.15.7.1)*1
1mhp_2	415	382	44	24	18	19.008	1.048	0.597	0.494	0.474	0.554	0	0	1	0	0	0	A3	A	(b.1.1.1)*2+(c.62.1.1)*1
1miw_1	790	740	66	39	24	61.776	1.048	0.350	0.301	0.419	0.332	0	1	0	0	0	0	C2m=	C2	(d.218.1.4,a.173.1.1)*2
1mix_1	206	185	37	20	13	9.620	1.121	0.566	0.487	0.618	0.540	0	0	1	0	0	0	A1m	A	(a.11.2.1,b.55.1.5)*1
1mk0_1	97	97	20	16	12	3.840	0.714	0.573	0.559	0.637	0.581	0	0	1	1	0	0	A1o	A	(d.226.1.1)*1
1mkf_1	742	703	47	39	24	43.992	0.746	0.490	0.402	0.261	0.451	0	1	0	0	0	0	C2o=	C2	(b.116.1.1)*2
1mkk_1	187	169	36	19	14	9.576	1.091	0.512	0.431	0.419	0.481	0	0	1	0	0	0	C2o=	C2	(g.17.1.1)*2
1mkm_1	986	942	63	34	31	66.402	0.969	0.442	0.381	0.418	0.418	0	1	0	0	0	0	C2m=	C2	(a.4.5.33,d.110.2.2)*4
1mky_1	407	364	46	25	19	21.850	1.045	0.503	0.426	0.596	0.477	0	0	1	0	0	0	A1m	A	(c.37.1.8,c.37.1.8,d.52.5.1)*1
1mla_1	305	302	30	23	20	13.800	0.698	0.556	0.491	0.540	0.529	0	0	1	0	0	0	A1m	A	(c.19.1.1,d.58.23.1)*1
1mn8_4	97	93	20	15	13	3.900	0.714	0.656	0.575	0.698	0.628	0	0	1	1	0	0	A1o	A	(a.61.1.6)*1
1mo1_1	174	162	35	13	13	5.915	1.346	0.581	0.562	0.686	0.572	0	0	1	1	0	0	C2o=	C2	(d.94.1.1)*2
1mog_1	804	804	36	35	35	44.100	0.514	0.359	0.444	0.002	0.400	0	1	0	0	1	0	TOI	T	(d.230.2.1)*12
1mp9_1	382	347	46	26	15	17.940	1.122	0.553	0.489	0.497	0.531	0	0	1	0	0	0	C2m=	C2	(d.129.1.1,d.129.1.1)*2
1mpg_1	282	276	29	27	17	13.311	0.659	0.572	0.509	0.520	0.553	0	0	1	1	0	0	A1m	A	(d.129.1.2,a.96.1.3)*1
1mpx_1	2456	2456	56	54	53	160.272	0.523	0.377	0.390	0.025	0.383	0	1	0	0	1	0	D2	D2	(c.69.1.21,b.18.1.13)*4
1mr1_1	291	269	36	23	18	14.904	0.878	0.578	0.461	0.654	0.526	0	0	1	0	0	0	A2	A	(b.26.1.1)*1+(d.217.1.2)*1
1msk_1	327	301	35	24	20	16.800	0.795	0.503	0.444	0.462	0.486	0	0	1	0	0	0	A1o	A	(d.173.1.1)*1
1mvf_1	171	151	32	17	13	7.072	1.067	0.618	0.484	0.589	0.559	0	0	1	0	0	0	A2	A	(b.1.1.1)*1+(b.129.1.1)*1
1mvk_2	188	182	30	21	15	9.450	0.833	0.433	0.420	0.271	0.429	0	1	0	0	0	0	D2	D2	(d.15.7.1)*4
1mw5_1	648	596	35	33	32	36.960	0.538	0.478	0.415	0.355	0.462	0	1	0	0	0	0	D2	D2	(d.259.1.1)*4
1mw9_1	556	535	53	37	18	35.298	0.964	0.384	0.367	0.573	0.387	0	1	0	0	0	0	A1o	A	(e.10.1.1)*1
1mwq_1	200	191	28	20	16	8.960	0.778	0.589	0.520	0.468	0.568	0	0	1	1	0	0	C2o=	C2	(d.58.4.7)*2
1mzg_1	287	265	48	18	17	14.688	1.371	0.536	0.462	0.537	0.514	0	0	1	0	0	0	C2o=	C2	(d.224.1.1)*2
1n0e_1	1130	1110	56	53	25	74.200	0.718	0.255	0.358	0.003	0.309	1	0	0	0	1	0	C4+	C8	(b.129.1.2)*8
1n10_1	228	209	36	17	15	9.180	1.125	0.564	0.520	0.557	0.551	0	0	1	1	0	0	A1m	A	(b.52.1.3,b.7.3.1)*1
1n1c_1	397	357	46	23	22	23.276	1.022	0.463	0.394	0.292	0.438	0	1	0	0	0	0	C2o=	C2	(a.184.1.1)*2
1n1t_1	628	598	51	25	24	30.600	1.041	0.577	0.481	0.607	0.536	0	0	1	0	0	0	A1m	A	(b.68.1.1,b.29.1.15)*1
1n2m_1	482	468	32	31	24	23.808	0.582	0.517	0.475	0.329	0.508	0	0	1	0	0	0	C3	C3	(d.155.1.2)*3
1n4k_1	292	260	36	20	20	14.400	0.900	0.509	0.446	0.511	0.488	0	0	1	0	0	0	A1m	A	(b.42.6.1,a.118.22.1)*1
1n4w_1	499	493	38	26	24	23.712	0.760	0.555	0.510	0.243	0.537	0	0	1	1	0	0	A1m	A	(c.3.1.2,d.16.1.1)*1
1n5u_1	583	537	45	41	22	40.590	0.714	0.446	0.356	0.438	0.403	0	1	0	0	0	0	A1m	A	(a.126.1.1,a.126.1.1,a.126.1.1)*1
1n7u_1	1108	966	91	47	17	72.709	1.422	0.507	0.349	0.305	0.429	0	0	1	0	0	0	C2o=	C2	(b.126.1.1)*2
1n7z_1	656	601	45	40	25	45.000	0.692	0.488	0.371	0.586	0.446	0	1	0	0	0	0	C2o=	C2	(b.127.1.1)*2
1n81_1	186	167	30	19	14	7.980	0.909	0.628	0.539	0.563	0.591	0	0	1	1	0	0	A1o	A	(a.185.1.1)*1
1n8j_1	1860	1860	69	67	32	147.936	0.697	0.145	0.285	0.000	0.216	1	0	0	0	1	0	D4+	D5	(c.47.1.10)*10
1n8v_2	103	102	19	19	14	5.054	0.576	0.398	0.471	0.102	0.443	0	1	0	0	1	0	A1o	A	(a.118.21.1)*1
1n8z_1	1015	921	77	47	20	72.380	1.149	0.344	0.319	0.180	0.337	0	1	0	0	0	0	A3	A	(b.1.1.1,b.1.1.2)*2+(c.10.2.5,g.3.9.1,c.10.2.5,g.3.9.1)*1
1n93_1	1340	1328	54	42	41	92.988	0.651	0.284	0.345	0.060	0.320	1	0	0	0	1	0	C4+	C4	(a.206.1.1)*4
1n99_1	325	323	39	31	14	16.926	0.867	0.564	0.463	0.552	0.526	0	0	1	0	0	0	C2m=	C2	(b.36.1.1,b.36.1.1)*2
1na6_1	760	711	49	36	28	49.392	0.766	0.471	0.374	0.537	0.432	0	1	0	0	0	0	C2m=	C2	(b.142.1.1,c.52.1.22)*2
1nap_1	261	259	26	21	19	10.374	0.650	0.493	0.501	0.242	0.491	0	1	0	0	1	0	D2	D2	(d.9.1.1)*4
1nbw_1	1436	1365	63	44	41	113.652	0.741	0.391	0.300	0.294	0.348	0	1	0	0	0	0	C2m≠	C2	(c.51.3.2)*2+(c.55.1.6,c.8.6.1,c.55.1.6)*2
1nc7_1	465	456	30	29	26	22.620	0.545	0.619	0.529	0.556	0.583	0	0	1	1	0	0	C4+	C4	(b.123.1.1)*4
1nd7_1	374	348	38	31	20	23.560	0.745	0.520	0.411	0.538	0.476	0	0	1	0	0	0	A1o	A	(d.148.1.1)*1
1ndb_1	596	554	45	29	25	32.625	0.833	0.546	0.459	0.439	0.514	0	0	1	0	0	0	A1m	A	(c.43.1.3,c.43.1.3)*1
1nds_1	330	302	32	28	16	14.336	0.727	0.183	0.164	0.164	0.180	1	0	0	0	0	0	A1m	A	(b.6.1.3,b.6.1.3)*1
1nez_1	615	577	40	35	26	36.400	0.656	0.476	0.418	0.483	0.454	0	1	0	0	0	0	A4+	A	(b.1.1.1)*2+(b.1.1.2)*1+(d.19.1.1,b.1.1.2)*1
1nf3_1	317	281	37	22	18	14.652	0.925	0.564	0.475	0.635	0.531	0	0	1	0	0	0	A2	A	(b.36.1.1)*1+(c.37.1.8)*1
1nfi_2	621	564	62	25	23	35.650	1.292	0.479	0.408	0.491	0.451	0	1	0	0	0	0	A3	A	(b.1.18.1)*1+(b.2.5.3,b.1.18.1)*1+(d.211.1.1)*1
1ng6_1	148	127	32	18	12	6.912	1.067	0.554	0.464	0.435	0.516	0	0	1	0	0	0	A1o	A	(a.182.1.1)*1
1ni5_1	866	742	64	37	37	87.616	0.865	0.340	0.234	0.488	0.295	1	0	0	0	0	0	C2m=	C2	(c.26.2.5,d.229.1.1,b.153.1.2)*2
1nig_1	146	134	28	17	14	6.664	0.903	0.616	0.503	0.413	0.566	0	0	1	1	0	0	A1o	A	(a.25.2.1)*1
1nij_1	317	294	35	25	17	14.875	0.833	0.586	0.483	0.577	0.544	0	0	1	0	0	0	A1m	A	(c.37.1.10,d.237.1.1)*1
1njh_1	216	206	28	20	17	9.520	0.757	0.593	0.517	0.411	0.560	0	0	1	1	0	0	C2o=	C2	(b.128.1.1)*2
1njr_1	498	470	37	32	22	26.048	0.685	0.538	0.471	0.513	0.517	0	0	1	0	0	0	C2o=	C2	(c.50.1.2)*2
1nkg_1	508	496	47	29	19	25.897	0.979	0.574	0.476	0.634	0.537	0	0	1	0	0	0	A1m	A	(b.30.5.10,b.3.1.2,b.18.1.25)*1
1nki_1	268	262	28	26	18	13.104	0.636	0.595	0.515	0.455	0.570	0	0	1	1	0	0	C2o=	C2	(d.32.1.2)*2
1nkz_1	846	810	43	39	39	65.403	0.551	0.226	0.259	0.000	0.223	1	0	0	0	1	0	A4+	A	(f.3.1.1)*18
1nl0_1	474	451	52	26	20	27.040	1.130	0.498	0.419	0.500	0.465	0	1	0	0	0	0	A3	A	(b.1.1.1,b.1.1.2)*2+(g.32.1.1)*1
1nls_1	948	904	40	40	39	62.400	0.506	0.513	0.390	0.240	0.457	0	0	1	0	0	0	D2	D2	(b.29.1.1)*4
1nlx_1	1456	1296	85	48	29	118.320	1.104	0.367	0.288	0.430	0.336	1	0	0	0	0	0	A4+	A	(a.24.17.1)*14
1nms_1	480	461	33	31	23	23.529	0.611	0.568	0.509	0.619	0.556	0	0	1	1	0	0	C2o=	C2	(c.17.1.1)*2
1nnw_1	503	487	44	26	24	27.456	0.880	0.533	0.448	0.617	0.505	0	0	1	0	0	0	C2o=	C2	(d.159.1.5)*2
1no1_1	67	67	16	15	9	2.160	0.667	0.548	0.559	0.344	0.560	0	0	1	1	1	0	A1o	A	(a.179.1.1)*1
1no7_1	542	513	38	29	24	26.448	0.717	0.582	0.494	0.519	0.554	0	0	1	0	0	0	A1o	A	(e.48.1.1)*1
1nof_1	383	376	37	24	20	17.760	0.841	0.623	0.514	0.626	0.570	0	0	1	1	0	0	A1m	A	(b.71.1.2,c.1.8.3)*1
1np3_1	3924	3924	68	67	66	300.696	0.511	0.378	0.321	0.044	0.339	0	1	0	0	0	0	TOI	T	(c.2.1.6,a.100.1.2)*12
1npe_1	427	371	36	31	20	22.320	0.706	0.539	0.425	0.515	0.493	0	0	1	0	0	0	A2	A	(b.68.5.1)*1+(g.3.11.2,g.3.11.2,g.3.11.2)*1
1nqb_1	1392	1242	50	49	47	115.150	0.521	0.353	0.290	0.054	0.319	1	0	0	0	0	0	D3	D3	(b.1.1.1,b.1.1.1)*6
1nrj_1	338	323	39	25	20	19.500	0.867	0.518	0.431	0.507	0.488	0	0	1	0	0	0	A2	A	(c.37.1.8)*1+(d.110.4.4)*1
1nsn_1	565	546	59	27	20	31.860	1.255	0.466	0.426	0.534	0.455	0	1	0	0	0	0	A3	A	(b.1.1.1,b.1.1.2)*2+(b.40.1.1)*1
1nsz_1	686	668	55	29	22	35.090	1.078	0.558	0.481	0.483	0.528	0	0	1	0	0	0	C2o=	C2	(b.30.5.4)*2
1nt2_1	890	838	85	34	29	83.810	1.349	0.201	0.248	0.015	0.226	1	0	0	0	1	0	C2o≠	C2	(a.183.1.1)*2+(c.66.1.3)*2
1nth_1	2742	2730	61	52	51	161.772	0.592	0.495	0.431	0.112	0.467	0	1	0	0	0	0	D3	D3	(c.1.25.1)*6
1ntk_1	4228	3948	94	68	52	332.384	0.783	0.368	0.319	0.227	0.346	0	1	0	0	0	0	C2m≠	C2	(a.3.1.3,f.23.11.1)*2+(d.184.1.3)*2+(d.185.1.1,d.185.1.1)*4+(f.21.1.2,f.32.1.1)*2+(f.23.12.1,b.33.1.1)*2+(f.23.13.1)*2+(f.23.14.1)*2+(f.23.15.1)*2+(f.27.1.1)*2+(f.28.1.1)*2
1nty_1	305	290	43	29	16	19.952	0.956	0.502	0.389	0.636	0.455	0	0	1	0	0	0	A1m	A	(a.87.1.1,b.55.1.1)*1
1nu9_1	571	514	43	33	23	32.637	0.768	0.506	0.421	0.504	0.479	0	0	1	0	0	0	A2	A	(a.8.6.1,a.8.6.1)*1+(b.47.1.2)*1
1nug_2	679	629	60	31	20	37.200	1.176	0.586	0.454	0.669	0.531	0	0	1	0	0	0	A1m	A	(b.1.18.9,d.3.1.4,b.1.5.1,b.1.5.1)*1
1nui_1	242	215	37	23	18	15.318	0.902	0.450	0.352	0.530	0.409	0	1	0	0	0	0	A1m	A	(g.41.3.2,e.13.1.2)*1
1nvi_1	446	410	58	20	19	22.040	1.487	0.582	0.478	0.543	0.546	0	0	1	0	0	0	C2o≠	C2	(d.15.3.1)*2+(d.41.5.1)*2
1nvm_1	1297	1226	85	28	27	64.260	1.545	0.569	0.470	0.549	0.529	0	0	1	0	0	0	C2m≠	C2	(c.1.10.5,a.5.7.1)*2+(c.2.1.3,d.81.1.1)*2
1nvv_1	801	737	55	40	21	46.200	0.902	0.510	0.427	0.606	0.481	0	0	1	0	0	0	A3	A	(a.117.1.1)*1+(c.37.1.8)*2
1nw9_1	329	314	36	25	20	18.000	0.800	0.577	0.459	0.635	0.534	0	0	1	0	0	0	A2	A	(c.17.1.1)*1+(g.52.1.1)*1
1nwz_1	125	125	20	18	14	5.040	0.625	0.618	0.546	0.551	0.588	0	0	1	1	0	0	A1o	A	(d.110.3.1)*1
1nxh_1	242	241	40	20	15	12.000	1.143	0.530	0.496	0.533	0.530	0	0	1	0	0	0	C2o=	C2	(a.200.1.1)*2
1nxu_1	665	652	41	28	27	30.996	0.745	0.557	0.501	0.476	0.539	0	0	1	1	0	0	C2o=	C2	(c.122.1.1)*2
1nxz_1	491	452	41	31	23	29.233	0.759	0.534	0.403	0.590	0.479	0	0	1	0	0	0	C2m=	C2	(b.122.1.2,c.116.1.5)*2
1ny5_1	769	746	52	39	25	50.700	0.812	0.421	0.393	0.449	0.419	0	1	0	0	0	0	C2m=	C2	(c.23.1.1,c.37.1.20)*2
1nyc_1	111	100	21	16	15	5.040	0.677	0.591	0.496	0.457	0.549	0	0	1	0	0	0	A1o	A	(b.61.2.2)*1
1nyr_1	1279	1126	79	37	35	102.305	1.097	0.443	0.310	0.470	0.385	0	1	0	0	0	0	C2m=	C2	(d.15.10.1,d.67.1.1,d.104.1.1,c.51.1.1)*2
1nz0_4	111	109	23	16	14	5.152	0.767	0.598	0.526	0.656	0.570	0	0	1	1	0	0	A1o	A	(d.14.1.2)*1
1nze_1	112	104	24	13	11	3.432	1.000	0.568	0.597	0.494	0.591	0	0	1	1	1	0	A1o	A	(a.24.18.1)*1
1nzi_1	311	282	48	23	13	14.352	1.333	0.527	0.469	0.315	0.506	0	0	1	0	0	0	C2m=	C2	(b.23.1.1,g.3.11.1)*2
1o0w_1	477	442	49	35	18	30.870	0.925	0.570	0.394	0.628	0.486	0	0	1	0	0	0	C2m=	C2	(a.149.1.1,d.50.1.1)*2
1o1n_1	574	574	37	29	27	28.971	0.661	0.443	0.450	0.145	0.446	0	1	0	0	1	0	A3	A	(a.1.1.2)*2+(a.1.1.2,a.1.1.2)*1
1o22_1	298	292	35	32	16	17.920	0.729	0.478	0.428	0.404	0.459	0	1	0	0	0	0	C2o=	C2	(d.238.1.1)*2
1o3x_1	112	103	36	14	10	5.040	1.500	0.589	0.474	0.478	0.533	0	0	1	0	0	0	A1o	A	(a.7.8.1)*1
1o5e_1	358	341	38	23	21	18.354	0.864	0.588	0.464	0.531	0.535	0	0	1	0	0	0	A2	A	(b.47.1.2)*1+(d.170.1.2)*1
1o5h_1	398	387	37	27	19	18.981	0.804	0.594	0.498	0.529	0.562	0	0	1	0	0	0	C2o=	C2	(a.191.1.1)*2
1o6e_1	914	856	79	33	29	75.603	1.274	0.375	0.297	0.148	0.333	1	0	0	0	0	0	C2o=	C2	(b.57.1.1)*4
1o6v_1	464	406	59	28	19	31.388	1.255	0.346	0.318	0.035	0.329	0	1	0	0	0	0	A1m	A	(c.10.2.1,b.1.18.15)*1
1o7f_1	421	388	40	29	21	24.360	0.800	0.412	0.385	0.297	0.400	0	1	0	0	0	0	A1m	A	(b.82.3.2,a.4.5.31,b.82.3.2)*1
1o7j_1	1300	1276	43	40	38	65.360	0.551	0.541	0.485	0.318	0.521	0	0	1	0	0	0	D2	D2	(c.88.1.1)*4
1o7l_1	511	478	47	34	22	35.156	0.839	0.494	0.356	0.472	0.434	0	1	0	0	0	0	C2m=	C2	(a.4.5.8,b.40.6.2,b.40.6.2)*2
1o7n_1	1923	1857	52	51	44	116.688	0.547	0.489	0.433	0.144	0.466	0	1	0	0	0	0	C3	C3	(b.33.1.2,d.129.3.3)*3+(d.17.4.4)*3
1o82_1	70	69	15	13	11	2.145	0.625	0.586	0.593	0.514	0.599	0	0	1	1	1	0	A1o	A	(a.64.2.1)*1
1o98_1	509	497	42	27	22	24.948	0.857	0.583	0.511	0.608	0.564	0	0	1	1	0	0	A1m	A	(c.76.1.3,c.105.1.1)*1
1oaz_1	345	326	38	25	20	19.000	0.844	0.549	0.433	0.657	0.500	0	0	1	0	0	0	A3	A	(b.1.1.1)*2+(c.47.1.1)*1
1ob1_2	531	505	57	26	21	31.122	1.213	0.476	0.398	0.421	0.441	0	1	0	0	0	0	A3	A	(b.1.1.1,b.1.1.2)*2+(g.3.11.4,g.3.11.4)*1
1obo_1	169	168	22	18	15	5.940	0.667	0.628	0.596	0.682	0.621	0	0	1	1	0	0	A1o	A	(c.23.5.1)*1
1oc0_1	401	380	41	24	21	20.664	0.911	0.580	0.487	0.619	0.547	0	0	1	0	0	0	A2	A	(e.1.1.1)*1+(g.64.1.1)*1
1ock_1	824	803	49	30	27	39.690	0.860	0.530	0.486	0.340	0.521	0	0	1	0	0	0	C2o=	C2	(c.117.1.1)*2
1ocr_1	3572	3312	93	62	42	242.172	0.894	0.430	0.381	0.124	0.411	0	1	0	0	0	0	C2m≠	C2	(a.118.11.1)*2+(a.51.1.1)*2+(f.17.2.1,b.6.1.2)*2+(f.23.1.1)*2+(f.23.2.1)*2+(f.23.3.1)*2+(f.23.4.1)*2+(f.23.5.1)*2+(f.23.6.1)*2+(f.23.7.1)*2+(f.24.1.1)*2+(f.25.1.1)*2+(g.41.5.3)*2
1ocy_1	594	558	49	23	23	25.921	1.065	0.638	0.514	0.542	0.584	0	0	1	1	0	0	C3	C3	(d.231.1.1)*3
1oe1_1	1008	951	41	41	31	52.111	0.569	0.589	0.480	0.594	0.548	0	0	1	0	0	0	C3	C3	(b.6.1.3,b.6.1.3)*3
1oel_1	7336	7324	103	84	83	718.116	0.617	0.210	0.255	0.005	0.237	1	0	0	0	1	0	D4+	D7	(a.129.1.1,d.56.1.1,c.8.5.1)*14
1oew_1	329	319	35	24	17	14.280	0.854	0.554	0.510	0.645	0.545	0	0	1	1	0	0	A1o	A	(b.50.1.2)*1
1oey_2	181	173	31	18	15	8.370	0.939	0.591	0.500	0.589	0.554	0	0	1	1	0	0	A2	A	(d.15.2.2)*2
1ofc_1	267	225	56	20	16	17.920	1.556	0.442	0.347	0.503	0.404	0	1	0	0	0	0	A1m	A	(a.187.1.1,a.4.1.3,a.4.1.13)*1
1ofd_1	1491	1394	50	46	35	80.500	0.617	0.539	0.448	0.583	0.506	0	0	1	0	0	0	A1m	A	(d.153.1.1,c.1.4.1,b.80.4.1)*1
1ofu_1	852	829	88	27	25	59.400	1.692	0.408	0.334	0.455	0.383	0	1	0	0	0	0	C2m≠	C2	(c.32.1.1,d.79.2.1)*2+(c.37.1.22)*2
1ofz_1	624	611	51	26	24	31.824	1.020	0.538	0.462	0.622	0.512	0	0	1	0	0	0	C2o=	C2	(b.68.8.1)*2
1ogy_1	917	882	40	36	32	46.080	0.588	0.578	0.498	0.470	0.549	0	0	1	0	0	0	A2	A	(a.138.1.3)*1+(c.81.1.1,b.52.2.2)*1
1oi7_1	270	265	33	21	17	11.781	0.868	0.608	0.525	0.592	0.578	0	0	1	1	0	0	A1m	A	(c.2.1.8,c.23.4.1)*1
1ois_1	221	194	39	17	16	10.608	1.182	0.497	0.443	0.584	0.480	0	1	0	0	0	0	A1o	A	(e.15.1.1)*1
1ojh_2	109	102	29	19	9	4.959	1.036	0.593	0.498	0.552	0.555	0	0	1	0	0	0	C2o=	C2	(a.214.1.1)*2
1ojx_1	1257	1247	54	53	24	68.688	0.701	0.516	0.465	0.304	0.498	0	0	1	0	0	0	C4+	C5	(c.1.10.1)*5
1ok0_1	74	74	19	14	10	2.660	0.792	0.618	0.572	0.573	0.603	0	0	1	1	0	0	A1o	A	(b.5.1.1)*1
1ok3_1	507	403	103	20	14	28.840	3.029	0.451	0.364	0.515	0.423	0	1	0	0	0	1	C2m=	C2	(g.18.1.1,g.18.1.1,g.18.1.1,g.18.1.1)*2
1ok8_1	1140	1044	64	34	33	71.808	0.955	0.431	0.385	0.348	0.419	0	1	0	0	0	0	C3	C3	(f.10.1.1,b.1.18.4)*3
1okc_1	292	262	32	23	20	14.720	0.744	0.484	0.431	0.261	0.462	0	1	0	0	0	0	A1o	A	(f.42.1.1)*1
1okg_1	362	341	40	24	20	19.200	0.909	0.540	0.438	0.481	0.498	0	0	1	0	0	0	A1m	A	(c.46.1.2,c.46.1.2,d.26.1.3)*1
1okh_1	92	90	31	12	9	3.348	1.476	0.639	0.554	0.495	0.601	0	0	1	1	0	0	C2o=	C2	(g.13.1.1)*2
1oks_1	54	53	18	13	9	2.106	0.818	0.596	0.539	0.574	0.573	0	0	1	1	0	0	A1o	A	(a.8.5.1)*1
1olt_1	434	427	35	29	23	23.345	0.673	0.471	0.459	0.245	0.467	0	1	0	0	0	0	A1o	A	(c.1.28.2)*1
1olz_1	1244	1159	59	55	31	100.595	0.686	0.402	0.316	0.506	0.372	0	1	0	0	0	0	C2m=	C2	(b.69.12.1,g.16.2.1,b.1.1.4)*2
1omi_2	227	220	31	20	18	11.160	0.816	0.479	0.455	0.325	0.471	0	1	0	0	0	0	A1m	A	(b.82.3.3,a.4.5.4)*1
1onx_1	3112	3088	68	66	46	206.448	0.607	0.479	0.374	0.095	0.421	0	1	0	0	0	0	D4+	D4	(b.92.1.7,c.1.9.13)*8
1oo0_1	236	215	33	20	16	10.560	0.917	0.593	0.509	0.619	0.560	0	0	1	1	0	0	A2	A	(d.232.1.1)*1+(d.58.7.1)*1
1oqj_1	90	87	19	15	13	3.705	0.679	0.627	0.551	0.437	0.597	0	0	1	1	0	0	A1o	A	(d.217.1.1)*1
1or7_1	247	218	30	21	17	10.710	0.789	0.589	0.511	0.602	0.564	0	0	1	1	0	0	A2	A	(a.177.1.1,a.4.13.2)*1+(a.180.1.1)*1
1ord_1	1460	1288	55	39	35	75.075	0.743	0.551	0.466	0.496	0.521	0	0	1	0	0	0	C2m=	C2	(c.23.1.4,c.67.1.5,d.125.1.1)*2
1orj_1	126	121	31	14	12	5.208	1.192	0.608	0.539	0.563	0.580	0	0	1	1	0	0	A1o	A	(a.24.19.1)*1
1ors_1	567	536	72	28	19	38.304	1.532	0.501	0.376	0.506	0.447	0	0	1	0	0	0	A3	A	(b.1.1.1,b.1.1.2)*2+(f.14.1.1)*1
1osp_1	683	606	62	36	23	51.336	1.051	0.353	0.297	0.484	0.337	1	0	0	0	0	0	A3	A	(b.1.1.1,b.1.1.2)*2+(b.76.1.1)*1
1osy_1	226	210	46	16	15	11.040	1.484	0.605	0.486	0.555	0.556	0	0	1	0	0	0	C2o=	C2	(b.1.21.1)*2
1ov9_1	93	83	22	13	12	3.432	0.880	0.574	0.547	0.327	0.562	0	0	1	1	0	0	C2o=	C2	(a.155.1.1)*2
1ova_2	758	711	46	41	24	45.264	0.708	0.533	0.422	0.413	0.486	0	0	1	0	0	0	C2o=	C2	(e.1.1.1)*2
1ovn_1	455	411	54	24	21	27.216	1.200	0.472	0.363	0.462	0.430	0	1	0	0	0	0	C2m=	C2	(c.47.1.7,a.71.1.1)*2
1ovo_1	224	200	27	22	14	8.316	0.750	0.574	0.531	0.548	0.564	0	0	1	1	0	0	C4+	C4	(g.68.1.1)*4
1ow1_1	167	150	20	18	17	6.120	0.571	0.597	0.540	0.648	0.579	0	0	1	1	0	0	A1o	A	(b.131.1.3)*1
1oxb_1	290	269	33	24	16	12.672	0.825	0.586	0.516	0.574	0.562	0	0	1	1	0	0	A2	A	(a.24.10.2)*1+(c.23.1.1)*1
1oxj_1	170	159	31	18	15	8.370	0.939	0.560	0.476	0.640	0.529	0	0	1	0	0	0	A1m	A	(a.60.1.2,a.118.1.13)*1
1oxx_1	352	330	45	28	15	18.900	1.047	0.523	0.426	0.556	0.483	0	0	1	0	0	0	A1m	A	(c.37.1.12,b.40.6.3)*1
1oy3_1	467	448	43	27	26	30.186	0.811	0.460	0.382	0.303	0.428	0	1	0	0	0	0	A3	A	(b.1.18.1)*2+(d.211.1.1)*1
1oyv_1	652	620	56	25	22	30.800	1.191	0.437	0.420	0.351	0.434	0	1	0	0	0	0	A3	A	(c.41.1.1)*2+(g.69.1.1,g.69.1.1)*1
1oyw_1	516	481	44	31	22	30.008	0.830	0.517	0.418	0.556	0.476	0	0	1	0	0	0	A1m	A	(c.37.1.19,c.37.1.19,a.4.5.43)*1
1oz2_1	324	298	38	29	17	18.734	0.826	0.499	0.419	0.269	0.469	0	1	0	0	0	0	A1m	A	(b.34.9.3,b.34.9.3,b.34.9.3)*1
1p0s_1	946	790	60	30	26	46.800	1.071	0.410	0.405	0.129	0.406	0	1	0	0	0	0	C2m≠	C2	(b.16.1.1)*2+(b.47.1.2)*2+(g.32.1.1,g.3.11.1)*2
1p1m_1	404	386	35	25	21	18.375	0.761	0.622	0.524	0.691	0.584	0	0	1	1	0	0	A1m	A	(b.92.1.4,c.1.9.9)*1
1p27_1	472	439	45	28	22	27.720	0.900	0.536	0.427	0.492	0.489	0	0	1	0	0	0	C2o≠	C2	(d.232.1.1)*2+(d.58.7.1)*2
1p35_2	596	570	57	27	26	40.014	1.075	0.418	0.389	0.303	0.416	0	1	0	0	0	0	C2o=	C2	(b.28.1.1)*2
1p3h_1	690	613	44	42	23	42.504	0.677	0.230	0.339	0.007	0.288	1	0	0	0	1	0	C4+	C7	(b.35.1.1)*7
1p3q_1	154	140	26	20	13	6.760	0.788	0.534	0.477	0.459	0.518	0	0	1	0	0	0	A3	A	(a.5.2.4)*2+(d.15.1.1)*1
1p4a_1	537	508	36	31	27	30.132	0.621	0.530	0.429	0.480	0.483	0	0	1	0	0	0	C2m=	C2	(a.4.5.40,c.61.1.1)*2
1p5d_1	455	442	36	29	22	22.968	0.706	0.565	0.480	0.602	0.533	0	0	1	0	0	0	A1m	A	(c.84.1.1,c.84.1.1,c.84.1.1,d.129.2.1)*1
1p5f_1	372	362	38	21	21	16.758	0.905	0.607	0.518	0.593	0.574	0	0	1	1	0	0	C2o=	C2	(c.23.16.2)*2
1p6a_1	309	297	39	25	15	14.625	0.975	0.547	0.489	0.580	0.531	0	0	1	0	0	0	A2	A	(b.1.1.1)*1+(b.21.1.1)*1
1p6o_1	317	304	31	24	18	13.392	0.738	0.608	0.551	0.507	0.590	0	0	1	1	0	0	C2o=	C2	(c.97.1.2)*2
1p7l_1	1532	1464	66	38	32	80.256	0.943	0.533	0.461	0.508	0.515	0	0	1	0	0	0	D2	D2	(d.130.1.1,d.130.1.1,d.130.1.1)*4
1p84_1	3892	3634	97	63	55	336.105	0.822	0.363	0.298	0.283	0.334	1	0	0	0	0	0	C2m≠	C2	(a.3.1.3,f.23.11.1)*2+(d.185.1.1,d.185.1.1)*4+(f.21.1.2,f.32.1.1)*2+(f.23.12.1,b.33.1.1)*2+(f.23.13.1)*2+(f.23.14.1)*2+(f.27.1.1)*2+(f.28.1.1)*2
1p9g_1	41	41	12	11	8	1.056	0.632	0.708	0.634	0.823	0.681	0	0	1	1	0	0	A1o	A	(g.3.1.1)*1
1p9h_1	537	522	46	21	20	19.320	1.122	0.605	0.572	0.410	0.605	0	0	1	1	0	0	C3	C3	(b.81.3.1)*3
1p9m_1	1324	1198	90	41	35	129.150	1.184	0.223	0.244	0.061	0.242	1	0	0	0	1	0	C2m≠	C2	(a.26.1.1)*2+(b.1.2.1,b.1.2.1)*2+(b.1.2.1,b.1.2.1,b.1.2.1)*2
1p9y_1	117	103	34	14	11	5.236	1.360	0.609	0.461	0.649	0.541	0	0	1	0	0	0	A1o	A	(d.241.2.1)*1
1pbj_1	120	107	23	16	12	4.416	0.821	0.578	0.538	0.596	0.571	0	0	1	1	0	0	A1o	A	(d.37.1.1)*1
1pby_1	905	875	57	35	25	49.875	0.950	0.524	0.436	0.603	0.490	0	0	1	0	0	0	A3	A	(a.137.9.1)*1+(a.3.1.7,a.3.1.7,b.61.4.1,b.1.18.14,b.1.18.14)*1+(b.69.2.2)*1
1pc6_1	274	262	32	27	18	15.552	0.711	0.413	0.393	0.214	0.401	0	1	0	0	0	0	C2o=	C2	(d.262.1.1)*2
1pcf_1	132	117	24	16	16	6.144	0.750	0.587	0.495	0.534	0.558	0	0	1	0	0	0	C2o=	C2	(d.18.1.1)*2
1pd3_1	54	51	25	12	6	1.800	1.389	0.641	0.604	0.416	0.630	0	0	1	1	0	0	A1o	A	(a.30.3.1)*1
1peu_1	1384	1298	74	38	30	84.360	1.088	0.479	0.399	0.550	0.453	0	1	0	0	0	0	C2m=	C2	(a.98.1.1,c.7.1.2)*2
1pf9_1	8015	8009	127	76	75	723.900	0.841	0.185	0.245	0.006	0.212	1	0	0	0	1	0	A4+	A	(a.129.1.1,d.56.1.1,c.8.5.1)*14+(b.35.1.1)*7
1pfo_1	942	880	83	29	25	60.175	1.537	0.419	0.385	0.101	0.406	0	1	0	0	0	0	C2m=	C2	(f.69.1.1,b.183.1.1)*2
1pfq_1	1453	1378	74	42	32	99.456	1.000	0.426	0.375	0.515	0.419	0	1	0	0	0	0	C2m=	C2	(b.70.3.1,c.69.1.24)*2
1pfv_1	547	507	55	27	20	29.700	1.170	0.548	0.454	0.625	0.514	0	0	1	0	0	0	A1m	A	(c.26.1.1,g.41.1.1,a.27.1.1)*1
1pfx_1	381	330	48	24	21	24.192	1.067	0.409	0.340	0.560	0.384	0	1	0	0	0	0	A2	A	(b.47.1.2)*1+(g.32.1.1,g.3.11.1,g.3.11.1)*1
1phz_1	806	768	51	38	24	46.512	0.823	0.534	0.447	0.473	0.505	0	0	1	0	0	0	C2m=	C2	(d.58.18.3,d.178.1.1)*2
1pi1_1	185	168	27	23	15	9.315	0.711	0.630	0.502	0.592	0.577	0	0	1	1	0	0	A1o	A	(a.29.7.1)*1
1pi2_1	366	366	29	28	28	22.736	0.518	0.277	0.361	0.013	0.318	1	0	0	0	1	0	D3	D3	(g.3.13.1)*6
1pin_1	306	280	38	22	19	15.884	0.927	0.501	0.446	0.171	0.473	0	0	1	0	0	0	C2m=	C2	(b.72.1.1,d.26.1.1)*2
1pix_1	1172	1043	49	39	30	57.330	0.710	0.556	0.464	0.520	0.517	0	0	1	0	0	0	C2m=	C2	(c.14.1.4,c.14.1.4)*2
1pj5_1	3308	3032	74	67	44	218.152	0.667	0.439	0.375	0.364	0.426	0	1	0	0	0	0	D2	D2	(c.3.1.2,d.16.1.5,d.250.1.1,b.44.2.1)*4
1pjc_1	2166	1998	53	52	52	143.312	0.510	0.459	0.361	0.202	0.419	0	1	0	0	0	0	D3	D3	(c.23.12.2,c.2.1.4)*6
1pju_1	115	111	26	16	11	4.576	0.963	0.552	0.495	0.429	0.528	0	0	1	0	0	0	A1m	A	(g.69.1.1,g.69.1.1)*1
1pjx_1	314	303	25	25	21	13.125	0.543	0.595	0.557	0.525	0.591	0	0	1	1	0	0	A1o	A	(b.68.6.1)*1
1pk0_1	1886	1856	63	60	45	170.100	0.600	0.307	0.296	0.087	0.306	1	0	0	0	0	0	C3	C3	(a.39.1.5)*3+(e.41.1.1)*3
1pkp_1	290	268	41	18	16	11.808	1.206	0.579	0.507	0.471	0.553	0	0	1	1	0	0	C2m=	C2	(d.50.1.2,d.14.1.1)*2
1pm3_1	137	127	31	14	13	5.642	1.148	0.585	0.543	0.485	0.579	0	0	1	1	0	0	C2o=	C2	(b.41.1.2)*2
1pmo_1	2743	2630	66	65	40	171.600	0.629	0.483	0.421	0.178	0.457	0	1	0	0	0	0	D3	D3	(c.67.1.6)*6
1pn0_1	1308	1217	54	46	32	79.488	0.692	0.460	0.413	0.318	0.445	0	1	0	0	0	0	C2m=	C2	(c.3.1.2,d.16.1.2,c.47.1.10)*2
1pp0_2	194	186	30	18	15	8.100	0.909	0.595	0.536	0.640	0.579	0	0	1	1	0	0	A1o	A	(d.103.1.1)*1
1pp9_1	4032	3817	95	68	52	335.920	0.792	0.342	0.302	0.149	0.322	0	1	0	0	0	0	C2m≠	C2	(a.3.1.3,f.23.11.1)*2+(d.184.1.3)*2+(d.185.1.1,d.185.1.1)*4+(f.21.1.2,f.32.1.1)*2+(f.23.12.1,b.33.1.1)*2+(f.23.13.1)*2+(f.23.14.1)*2+(f.27.1.1)*2+(f.28.1.1)*2
1ppr_1	936	936	55	55	25	75.625	0.688	0.295	0.298	0.384	0.306	1	0	0	0	1	0	C3	C3	(a.131.1.1,a.131.1.1)*3
1prz_1	252	228	32	21	18	12.096	0.821	0.572	0.477	0.572	0.533	0	0	1	0	0	0	A1o	A	(d.265.1.3)*1
1ps9_1	671	636	46	33	23	34.914	0.821	0.509	0.448	0.447	0.485	0	0	1	0	0	0	A1m	A	(c.1.4.1,c.4.1.1,c.3.1.1)*1
1psr_1	200	187	27	22	15	8.910	0.730	0.562	0.499	0.306	0.535	0	0	1	0	0	0	C2o=	C2	(a.39.1.2)*2
1puc_1	202	192	38	22	16	13.376	1.000	0.417	0.371	0.470	0.401	0	1	0	0	0	0	C2o=	C2	(d.97.1.1)*2
1pv5_1	261	254	36	20	17	12.240	0.973	0.609	0.510	0.588	0.569	0	0	1	1	0	0	A1o	A	(d.251.1.1)*1
1pvm_1	362	333	33	29	19	18.183	0.688	0.561	0.486	0.359	0.534	0	0	1	0	0	0	C2m=	C2	(d.37.1.1,g.41.13.1)*2
1pvv_1	3756	3660	63	62	62	242.172	0.508	0.488	0.403	0.105	0.446	0	1	0	0	0	0	TOI	T	(c.78.1.1,c.78.1.1)*12
1pwu_1	747	677	64	34	23	50.048	1.123	0.470	0.370	0.534	0.430	0	1	0	0	0	0	A1m	A	(d.92.1.14,d.166.1.1,d.92.1.14)*1
1px5_2	341	332	35	29	17	17.255	0.761	0.521	0.481	0.438	0.510	0	0	1	0	0	0	A1m	A	(d.218.1.6,a.160.1.2)*1
1pxv_1	294	261	34	21	18	12.852	0.872	0.606	0.507	0.699	0.563	0	0	1	1	0	0	A2	A	(b.61.2.2)*1+(d.3.1.1)*1
1pyt_1	902	872	54	43	25	58.050	0.794	0.462	0.393	0.476	0.440	0	1	0	0	0	0	A4+	A	(b.47.1.2)*2+(c.56.5.1)*1+(d.58.3.1)*1
1pz4_1	113	109	21	17	14	4.998	0.677	0.525	0.504	0.496	0.522	0	0	1	1	0	0	A1o	A	(d.106.1.1)*1
1pzw_1	160	142	34	17	14	8.092	1.097	0.627	0.483	0.619	0.564	0	0	1	0	0	0	C2o=	C2	(g.39.1.10)*2
1q19_1	2000	1954	63	61	31	119.133	0.685	0.457	0.414	0.206	0.442	0	1	0	0	0	0	D2	D2	(d.153.1.1,c.26.2.1)*4
1q1r_1	421	400	37	33	20	24.420	0.698	0.467	0.411	0.283	0.448	0	1	0	0	0	0	A1m	A	(c.3.1.5,c.3.1.5,d.87.1.1)*1
1q2h_2	126	122	28	16	11	4.928	1.037	0.655	0.573	0.566	0.622	0	0	1	1	0	0	C2o=	C2	(a.34.4.1)*2
1q2l_1	937	924	55	39	35	75.075	0.743	0.190	0.293	0.002	0.246	1	0	0	0	1	0	A1m	A	(d.185.1.1,d.185.1.1,d.185.1.1,d.185.1.1)*1
1q3b_1	259	239	41	18	16	11.808	1.206	0.569	0.487	0.505	0.535	0	0	1	0	0	0	A1m	A	(b.113.1.1,a.156.1.2,g.39.1.8)*1
1q3i_1	192	184	28	21	15	8.820	0.778	0.634	0.520	0.607	0.587	0	0	1	1	0	0	A1o	A	(d.220.1.1)*1
1q3q_1	8288	8288	82	80	79	518.240	0.516	0.147	0.301	0.001	0.214	1	0	0	0	1	0	D4+	D8	(a.129.1.2,d.56.1.2,c.8.5.2)*16
1q3x_1	321	304	41	22	19	17.138	1.000	0.535	0.434	0.586	0.494	0	0	1	0	0	0	A1m	A	(g.18.1.1,b.47.1.2)*1
1q57_1	3381	3143	78	76	54	320.112	0.600	0.165	0.232	0.020	0.204	1	0	0	0	1	0	A4+	A	(e.13.1.2,c.37.1.11)*7
1q5r_1	3290	3268	70	69	52	251.160	0.579	0.402	0.338	0.063	0.360	0	1	0	0	0	0	C4+	C7	(d.153.1.4)*14
1q5x_1	473	463	37	35	18	23.310	0.698	0.467	0.461	0.103	0.461	0	1	0	0	0	0	C3	C3	(c.8.7.1)*3
1q5y_1	329	325	26	25	22	14.300	0.553	0.562	0.520	0.564	0.554	0	0	1	1	0	0	D2	D2	(d.58.18.4)*4
1q5z_1	145	137	23	20	14	6.440	0.676	0.617	0.509	0.486	0.570	0	0	1	1	0	0	A1o	A	(a.196.1.1)*1
1q74_1	287	281	29	25	17	12.325	0.690	0.533	0.508	0.677	0.543	0	0	1	1	0	0	A1o	A	(c.134.1.1)*1
1q7z_1	559	536	46	27	22	27.324	0.939	0.590	0.481	0.605	0.544	0	0	1	0	0	0	A1m	A	(c.1.26.1,c.1.21.2)*1
1q88_2	198	174	26	19	16	7.904	0.743	0.581	0.520	0.576	0.558	0	0	1	1	0	0	A1o	A	(e.47.1.1)*1
1q90_1	1904	1678	66	57	39	146.718	0.688	0.382	0.310	0.487	0.365	0	1	0	0	0	0	C2m≠	C2	(b.2.6.1,b.84.2.2,f.23.23.1)*2+(b.33.1.1)*2+(f.21.1.2)*2+(f.23.12.1)*2+(f.23.24.1)*2+(f.23.25.1)*2+(f.23.26.1)*2+(f.23.27.1)*2+(f.32.1.1)*2
1q9u_1	256	252	27	23	19	11.799	0.643	0.582	0.531	0.438	0.569	0	0	1	1	0	0	C2o=	C2	(d.129.7.1)*2
1qak_1	1442	1324	57	42	33	79.002	0.760	0.573	0.454	0.414	0.519	0	0	1	0	0	0	C2m=	C2	(d.82.1.1,d.17.2.1,d.17.2.1,b.30.2.1)*2
1qb7_1	472	456	37	31	22	25.234	0.698	0.564	0.474	0.640	0.540	0	0	1	0	0	0	C2o=	C2	(c.61.1.1)*2
1qba_1	858	787	47	35	28	46.060	0.746	0.560	0.451	0.587	0.514	0	0	1	0	0	0	A1m	A	(b.2.2.3,d.92.2.1,c.1.8.6,b.1.18.2)*1
1qcs_1	195	181	30	21	14	8.820	0.857	0.594	0.502	0.446	0.554	0	0	1	1	0	0	A1m	A	(b.52.2.3,d.31.1.1)*1
1qd1_1	644	633	56	27	25	37.800	1.077	0.443	0.416	0.452	0.440	0	1	0	0	0	0	C2m=	C2	(d.58.34.1,d.58.34.1)*2
1qd5_1	257	239	31	22	18	12.276	0.775	0.537	0.491	0.298	0.518	0	0	1	0	0	0	A1o	A	(f.4.2.1)*1
1qdm_1	433	403	40	26	20	20.800	0.870	0.554	0.470	0.492	0.525	0	0	1	0	0	0	A1m	A	(a.64.1.2,b.50.1.2)*1
1qex_1	1728	1626	129	31	31	123.969	2.081	0.449	0.337	0.469	0.409	0	1	0	0	0	1	D3	D3	(b.32.1.1)*6
1qh4_1	760	692	49	30	29	42.630	0.831	0.390	0.398	0.424	0.406	0	1	0	0	1	0	C2m=	C2	(a.83.1.1,d.128.1.2)*2
1qhd_1	1191	1170	58	35	35	71.050	0.829	0.503	0.447	0.351	0.477	0	0	1	0	0	0	C3	C3	(a.115.1.2,b.19.1.1)*3
1qhf_1	960	936	48	45	27	58.320	0.667	0.501	0.421	0.102	0.459	0	0	1	0	0	0	D2	D2	(c.60.1.1)*4
1qhv_1	585	567	33	32	28	29.568	0.550	0.581	0.491	0.448	0.545	0	0	1	0	0	0	C3	C3	(b.21.1.1)*3
1qi9_1	1111	1094	51	35	32	57.120	0.761	0.574	0.485	0.571	0.538	0	0	1	0	0	0	C2o=	C2	(a.111.1.2)*2
1qiu_1	792	740	62	29	28	50.344	1.088	0.512	0.377	0.409	0.452	0	0	1	0	0	0	C3	C3	(b.83.1.1,b.21.1.1)*3
1qkd_1	124	106	21	19	14	5.586	0.636	0.556	0.457	0.516	0.519	0	0	1	0	0	0	C2o=	C2	(g.7.1.1)*2
1qks_1	1118	1039	61	35	28	59.780	0.968	0.544	0.451	0.440	0.510	0	0	1	0	0	0	C2m=	C2	(a.3.1.2,b.70.2.1)*2
1qmh_1	669	665	47	31	26	37.882	0.825	0.408	0.413	0.490	0.423	0	1	0	0	1	0	C2m=	C2	(d.68.2.1,c.47.2.1)*2
1qnf_1	475	437	44	25	24	26.400	0.898	0.529	0.453	0.413	0.501	0	0	1	0	0	0	A1m	A	(c.28.1.1,a.99.1.1)*1
1qo8_1	1128	1005	56	43	28	67.424	0.789	0.486	0.379	0.559	0.447	0	1	0	0	0	0	C2m=	C2	(a.138.1.3,c.3.1.4,d.168.1.1)*2
1qqg_1	417	404	66	21	19	26.334	1.650	0.472	0.395	0.468	0.445	0	1	0	0	0	0	C2m=	C2	(b.55.1.2,b.55.1.2)*2
1qr0_1	228	211	32	23	16	11.776	0.821	0.554	0.453	0.697	0.517	0	0	1	0	0	0	A1m	A	(d.150.1.1,d.150.1.1)*1
1qsa_1	618	591	46	41	23	43.378	0.719	0.263	0.328	0.017	0.297	1	0	0	0	1	0	A1m	A	(a.118.5.1,d.2.1.6)*1
1qsd_1	204	196	41	20	12	9.840	1.281	0.523	0.479	0.532	0.511	0	0	1	0	0	0	C2o=	C2	(a.7.5.1)*2
1qsm_1	600	579	49	39	20	38.220	0.831	0.490	0.412	0.349	0.466	0	1	0	0	0	0	D2	D2	(d.108.1.1)*4
1qts_1	247	232	38	19	15	10.830	1.118	0.575	0.501	0.544	0.549	0	0	1	1	0	0	A1m	A	(b.1.10.1,d.105.1.1)*1
1qup_1	440	392	46	25	21	24.150	1.000	0.541	0.399	0.582	0.480	0	0	1	0	0	0	C2m=	C2	(d.58.17.1,b.1.8.1)*2
1quq_1	469	421	46	28	21	27.048	0.939	0.529	0.405	0.636	0.478	0	0	1	0	0	0	A4+	A	(b.40.4.3)*4
1qv9_1	1692	1644	56	56	31	97.216	0.644	0.552	0.443	0.272	0.500	0	0	1	0	0	0	D3	D3	(c.127.1.1)*6
1qw2_1	408	408	39	28	20	21.840	0.812	0.602	0.471	0.578	0.539	0	0	1	0	0	0	D2	D2	(d.249.1.1)*4
1qw9_1	2982	2937	64	63	60	241.920	0.520	0.392	0.330	0.146	0.369	0	1	0	0	0	0	D3	D3	(b.71.1.2,c.1.8.3)*6
1qxp_2	788	741	58	36	23	48.024	0.983	0.459	0.392	0.443	0.436	0	1	0	0	0	0	A1m	A	(d.3.1.3,b.14.1.1,a.39.1.8,a.39.1.8)*1
1qyn_1	535	514	44	28	25	30.800	0.830	0.549	0.431	0.400	0.495	0	0	1	0	0	0	D2	D2	(d.33.1.1)*4
1qz1_1	576	510	71	49	19	66.101	1.044	0.225	0.199	0.024	0.211	1	0	0	0	0	0	C2m=	C2	(b.1.1.4,b.1.1.4,b.1.1.4)*2
1qzu_3	160	146	23	17	16	6.256	0.697	0.558	0.484	0.584	0.536	0	0	1	0	0	0	A1o	A	(c.34.1.1)*1
1r0d_1	194	183	37	17	12	7.548	1.276	0.591	0.535	0.466	0.576	0	0	1	1	0	0	A1o	A	(a.216.1.1)*1
1r0k_1	762	700	57	29	28	46.284	1.000	0.530	0.392	0.596	0.470	0	0	1	0	0	0	C2m=	C2	(c.2.1.3,d.81.1.3,a.69.3.1)*2
1r0r_1	325	311	27	23	21	13.041	0.614	0.609	0.531	0.685	0.584	0	0	1	1	0	0	A2	A	(c.41.1.1)*1+(g.68.1.1)*1
1r0v_1	488	466	45	30	19	25.650	0.918	0.549	0.489	0.546	0.531	0	0	1	0	0	0	C2m=	C2	(c.52.2.1,d.75.1.1,c.52.2.1)*2
1r11_1	606	580	57	33	18	33.858	1.118	0.564	0.474	0.576	0.534	0	0	1	0	0	0	C2m=	C2	(d.75.1.1,c.52.2.1,d.75.1.1,c.52.2.1)*2
1r29_1	244	224	35	21	15	11.025	0.972	0.590	0.511	0.418	0.562	0	0	1	1	0	0	C2o=	C2	(d.42.1.1)*2
1r2j_1	353	336	37	21	19	14.763	0.925	0.581	0.501	0.428	0.548	0	0	1	1	0	0	A1m	A	(e.6.1.1,a.29.3.1)*1
1r3f_1	278	247	42	24	14	14.112	1.105	0.573	0.446	0.628	0.518	0	0	1	0	0	0	A1m	A	(d.265.1.2,b.122.1.1)*1
1r6b_1	704	593	71	35	20	49.700	1.291	0.411	0.323	0.239	0.370	0	1	0	0	0	0	A1m	A	(a.174.1.1,c.37.1.20,c.37.1.20)*1
1r6j_1	82	77	20	14	11	3.080	0.800	0.567	0.519	0.431	0.553	0	0	1	1	0	0	A1o	A	(b.36.1.1)*1
1r6l_1	1416	1374	51	51	34	88.434	0.600	0.354	0.378	0.288	0.380	0	1	0	0	1	0	D3	D3	(d.14.1.4,d.101.1.1)*6
1r6o_1	236	218	37	18	16	10.656	1.088	0.591	0.500	0.644	0.556	0	0	1	1	0	0	A2	A	(a.174.1.1)*1+(d.45.1.2)*1
1r6t_1	802	729	68	28	24	45.696	1.308	0.566	0.444	0.470	0.514	0	0	1	0	0	0	C2m≠	C2	(a.16.1.3,c.26.1.1)*1+(c.26.1.1)*1
1r6x_1	386	363	38	24	21	19.152	0.844	0.583	0.485	0.575	0.545	0	0	1	0	0	0	A1m	A	(b.122.1.3,c.26.1.5)*1
1r75_1	110	102	22	16	12	4.224	0.786	0.636	0.563	0.717	0.604	0	0	1	1	0	0	A1o	A	(b.134.1.1)*1
1r7a_1	1008	1004	66	32	31	65.472	1.048	0.471	0.406	0.301	0.447	0	1	0	0	0	0	C2m=	C2	(c.1.8.1,b.71.1.1)*2
1r7l_1	212	173	34	19	16	10.336	0.971	0.626	0.468	0.609	0.558	0	0	1	0	0	0	C2o=	C2	(d.277.1.1)*2
1r89_1	874	824	85	31	30	79.050	1.393	0.313	0.292	0.084	0.306	1	0	0	0	0	0	C2m=	C2	(d.218.1.7,a.160.1.3,d.58.16.2)*2
1r8g_1	710	685	46	31	26	37.076	0.807	0.506	0.458	0.422	0.486	0	0	1	0	0	0	C2o=	C2	(d.128.1.3)*2
1r8h_1	174	150	38	15	13	7.410	1.357	0.563	0.495	0.553	0.543	0	0	1	0	0	0	C2o=	C2	(d.58.8.1)*2
1r8i_1	187	176	39	17	13	8.619	1.300	0.576	0.471	0.627	0.534	0	0	1	0	0	0	A1o	A	(a.8.7.1)*1
1r8j_1	536	480	46	29	21	28.014	0.920	0.518	0.436	0.570	0.485	0	0	1	0	0	0	C2m=	C2	(c.23.1.5,a.186.1.1)*2
1r8q_2	373	352	38	28	21	22.344	0.776	0.491	0.413	0.463	0.463	0	1	0	0	0	0	A2	A	(a.118.3.1)*1+(c.37.1.8)*1
1rc9_1	221	204	34	19	17	10.982	0.944	0.605	0.475	0.658	0.555	0	0	1	0	0	0	A1m	A	(d.111.1.1,g.19.1.2)*1
1rcq_1	714	690	50	28	25	35.000	0.943	0.549	0.492	0.517	0.533	0	0	1	0	0	0	C2m=	C2	(b.49.2.2,c.1.6.1)*2
1rcu_1	680	646	40	38	21	31.920	0.678	0.571	0.489	0.420	0.535	0	0	1	0	0	0	D2	D2	(c.129.1.1)*4
1rdz_1	1348	1234	60	42	27	68.040	0.870	0.549	0.468	0.333	0.520	0	0	1	0	0	0	D2	D2	(e.7.1.1)*4
1reg_1	242	210	42	19	17	13.566	1.167	0.558	0.436	0.570	0.509	0	0	1	0	0	0	C2o=	C2	(d.58.27.1)*2
1rfx_1	267	245	42	19	17	13.566	1.167	0.552	0.429	0.537	0.498	0	0	1	0	0	0	C3	C3	(g.77.1.1)*3
1rfz_1	643	627	34	32	27	29.376	0.576	0.546	0.500	0.311	0.530	0	0	1	1	0	0	D2	D2	(a.195.1.1)*4
1rg8_1	141	140	20	18	16	5.760	0.588	0.598	0.564	0.428	0.587	0	0	1	1	0	0	A1o	A	(b.42.1.1)*1
1rh1_1	490	459	68	23	20	31.280	1.581	0.427	0.355	0.390	0.391	0	1	0	0	0	0	A1m	A	(b.110.1.1,f.1.1.1)*1
1rhs_1	293	292	31	21	20	13.020	0.756	0.597	0.527	0.649	0.578	0	0	1	1	0	0	A1m	A	(c.46.1.2,c.46.1.2)*1
1rhy_1	540	474	35	35	21	25.725	0.625	0.577	0.454	0.504	0.525	0	0	1	0	0	0	C3	C3	(d.14.1.9,d.14.1.9)*3
1rhz_1	529	493	39	28	28	30.576	0.696	0.487	0.412	0.452	0.461	0	1	0	0	0	0	A3	A	(f.17.6.1)*1+(f.23.28.1)*1+(f.41.1.1)*1
1ris_1	388	388	35	31	22	23.870	0.660	0.425	0.420	0.059	0.417	0	1	0	0	0	0	D2	D2	(d.58.14.1)*4
1rju_1	36	35	13	9	9	1.053	0.722	0.665	0.575	0.603	0.629	0	0	1	1	0	0	A1o	A	(g.46.1.1)*1
1rk8_1	247	232	31	23	15	10.695	0.816	0.572	0.510	0.498	0.548	0	0	1	1	0	0	A3	A	(b.72.3.1)*1+(d.232.1.1)*1+(d.58.7.1)*1
1rke_1	438	385	50	34	16	27.200	1.000	0.538	0.386	0.558	0.465	0	0	1	0	0	0	A2	A	(a.24.9.1)*1+(a.24.9.1,a.24.9.1)*1
1rki_1	101	92	23	16	11	4.048	0.852	0.602	0.538	0.523	0.587	0	0	1	1	0	0	A1o	A	(d.308.1.2)*1
1rl2_2	137	133	23	17	13	5.083	0.767	0.578	0.553	0.564	0.578	0	0	1	1	0	0	A1m	A	(b.40.4.5,b.34.5.3)*1
1rl6_1	164	142	36	17	12	7.344	1.241	0.539	0.442	0.620	0.498	0	0	1	0	0	0	A1m	A	(d.141.1.1,d.141.1.1)*1
1rlb_1	834	742	63	33	26	54.054	1.068	0.499	0.369	0.545	0.444	0	1	0	0	0	0	C2o≠	C2	(b.3.4.1)*4+(b.60.1.1)*2
1rlh_1	151	135	23	18	14	5.796	0.719	0.612	0.512	0.632	0.572	0	0	1	1	0	0	A1o	A	(d.256.1.1)*1
1rlr_1	737	683	47	30	28	39.480	0.810	0.519	0.452	0.521	0.496	0	0	1	0	0	0	A1m	A	(a.98.1.1,c.7.1.2)*1
1rmd_1	232	180	32	21	19	12.768	0.800	0.560	0.401	0.591	0.494	0	0	1	0	0	0	C2m=	C2	(g.44.1.1,g.37.1.1)*2
1ro2_1	210	198	29	20	18	10.440	0.763	0.564	0.494	0.584	0.548	0	0	1	0	0	0	A1o	A	(d.264.1.2)*1
1rp0_1	2224	2200	57	56	41	130.872	0.588	0.392	0.426	0.115	0.423	0	1	0	0	1	0	D4+	D4	(c.3.1.6)*8
1rp3_1	312	284	38	26	17	16.796	0.884	0.566	0.428	0.578	0.506	0	0	1	0	0	0	A2	A	(a.137.11.1)*1+(a.177.1.1,a.4.13.1,a.4.13.2)*1
1rp4_1	374	349	33	26	23	19.734	0.673	0.568	0.470	0.645	0.533	0	0	1	0	0	0	A1o	A	(a.227.1.1)*1
1rp5_1	687	631	58	32	22	40.832	1.074	0.548	0.392	0.545	0.476	0	0	1	0	0	0	A1m	A	(d.175.1.1,e.3.1.1,d.11.1.1,d.11.1.1)*1
1rpo_1	122	116	33	11	11	3.993	1.500	0.579	0.582	0.344	0.583	0	0	1	1	1	0	C2o=	C2	(a.30.1.1)*2
1rqb_1	944	890	58	32	30	55.680	0.935	0.512	0.432	0.494	0.486	0	0	1	0	0	0	C2m=	C2	(c.1.10.5,a.5.7.2)*2
1rqg_1	1212	1162	53	43	34	77.486	0.688	0.496	0.411	0.473	0.462	0	1	0	0	0	0	C2m=	C2	(c.26.1.1,g.41.1.1,a.27.1.1)*2
1rr7_1	94	91	28	19	13	6.916	0.875	0.244	0.290	0.072	0.268	1	0	0	0	1	0	A1o	A	(a.4.1.14)*1
1rrk_1	480	468	52	25	20	26.000	1.156	0.508	0.436	0.559	0.483	0	0	1	0	0	0	A1m	A	(c.62.1.1,b.47.1.2)*1
1rss_1	140	119	26	16	13	5.408	0.897	0.629	0.523	0.602	0.586	0	0	1	1	0	0	A1o	A	(a.75.1.1)*1
1rtm_1	447	358	38	37	21	29.526	0.655	0.478	0.340	0.380	0.417	0	1	0	0	0	0	C3	C3	(h.1.1.1,d.169.1.1)*3
1rtq_1	291	291	27	24	19	12.312	0.628	0.606	0.549	0.606	0.589	0	0	1	1	0	0	A1o	A	(c.56.5.4)*1
1rut_1	157	152	46	14	12	7.728	1.769	0.526	0.448	0.482	0.499	0	0	1	0	0	0	A1m	A	(g.39.1.3,g.39.1.3,g.39.1.3,g.39.1.3)*1
1rvk_1	381	378	33	26	22	18.876	0.688	0.510	0.488	0.385	0.504	0	0	1	0	0	0	A1m	A	(d.54.1.1,c.1.11.2)*1
1rvv_1	4620	4181	93	70	53	345.030	0.756	0.206	0.276	0.001	0.239	1	0	0	0	1	0	C2o=	C2	(c.16.1.1)*30
1rwa_1	754	711	49	31	26	39.494	0.860	0.527	0.447	0.630	0.502	0	0	1	0	0	0	A1m	A	(a.102.3.2,b.30.5.2,b.24.1.1)*1
1rwt_1	13086	13086	134	133	133	2370.326	0.504	0.000	0.089	0.000	0.048	1	0	0	0	1	0	A4+	A	(f.43.1.1)*60
1rwz_1	732	726	47	47	22	48.598	0.681	0.289	0.355	0.003	0.319	1	0	0	0	1	0	C3	C3	(d.131.1.2,d.131.1.2)*3
1rya_1	320	314	36	25	19	17.100	0.818	0.563	0.482	0.460	0.536	0	0	1	0	0	0	C2o=	C2	(d.113.1.5)*2
1ryl_1	157	154	27	18	14	6.804	0.844	0.595	0.552	0.465	0.584	0	0	1	1	0	0	A1o	A	(d.276.1.1)*1
1rzm_1	1352	1172	48	47	34	76.704	0.593	0.513	0.419	0.528	0.483	0	0	1	0	0	0	D2	D2	(c.1.10.4)*4
1s0p_1	352	346	39	27	17	17.901	0.886	0.528	0.479	0.388	0.512	0	0	1	0	0	0	C2o=	C2	(a.192.1.1)*2
1s16_1	380	345	44	21	20	18.480	1.073	0.548	0.471	0.570	0.523	0	0	1	0	0	0	A1m	A	(d.122.1.2,d.14.1.3)*1
1s1m_1	2140	2092	74	72	34	181.152	0.698	0.436	0.301	0.333	0.366	0	1	0	0	0	0	D2	D2	(c.37.1.10,c.23.16.1)*4
1s2d_1	998	992	39	39	32	48.672	0.549	0.565	0.502	0.388	0.540	0	0	1	1	0	0	D3	D3	(c.23.14.1)*6
1s2e_1	864	846	55	31	31	52.855	0.887	0.529	0.425	0.217	0.484	0	0	1	0	0	0	C3	C3	(b.32.1.1)*3
1s2x_1	180	174	41	16	12	7.872	1.464	0.565	0.490	0.680	0.538	0	0	1	0	0	0	A1o	A	(a.47.3.1)*1
1s4m_1	277	253	40	20	17	13.600	1.081	0.574	0.483	0.623	0.538	0	0	1	0	0	0	A1m	A	(c.26.1.3,b.43.5.1)*1
1s5e_1	746	715	42	34	32	45.696	0.636	0.524	0.413	0.566	0.477	0	0	1	0	0	0	A4+	A	(b.40.2.1)*5+(d.166.1.1)*1
1s6v_1	402	389	41	26	20	21.320	0.891	0.508	0.462	0.602	0.500	0	0	1	0	0	0	A2	A	(a.3.1.1)*1+(a.93.1.1)*1
1s70_1	600	550	46	36	20	33.120	0.821	0.480	0.422	0.538	0.464	0	1	0	0	0	0	A2	A	(d.159.1.3)*1+(d.211.1.1)*1
1s7m_1	472	435	45	23	22	22.770	1.000	0.583	0.450	0.450	0.521	0	0	1	0	0	0	C3	C3	(b.144.1.1)*3
1s99_1	366	361	31	23	22	15.686	0.689	0.573	0.524	0.405	0.555	0	0	1	1	0	0	C2o=	C2	(d.58.48.2)*2
1s9r_1	818	783	53	36	23	43.884	0.898	0.575	0.475	0.532	0.533	0	0	1	0	0	0	C2o=	C2	(d.126.1.4)*2
1s9u_1	201	188	26	22	15	8.580	0.703	0.629	0.535	0.644	0.590	0	0	1	1	0	0	A1o	A	(a.184.1.1)*1
1sbs_1	884	800	64	36	26	59.904	1.032	0.385	0.334	0.480	0.368	0	1	0	0	0	0	C2m=	C2	(b.1.1.1,b.1.1.2)*4
1sby_1	508	499	41	27	21	23.247	0.854	0.585	0.515	0.654	0.559	0	0	1	1	0	0	C2o=	C2	(c.2.1.2)*2
1sc0_1	137	133	28	16	13	5.824	0.966	0.604	0.509	0.610	0.567	0	0	1	1	0	0	A1o	A	(d.38.1.5)*1
1scz_1	5592	5592	86	85	84	614.040	0.509	0.155	0.230	0.001	0.200	1	0	0	0	1	0	TOI	O	(c.43.1.1)*24
1sdd_1	869	809	55	43	22	52.030	0.846	0.525	0.412	0.613	0.479	0	0	1	0	0	0	A2	A	(b.6.1.3,b.6.1.3)*1+(b.6.1.3,b.6.1.3,b.18.1.2,b.18.1.2)*1
1sdi_1	213	199	24	21	18	9.072	0.615	0.601	0.511	0.560	0.568	0	0	1	1	0	0	A1o	A	(a.198.1.1)*1
1sed_1	334	279	39	39	18	27.378	0.684	0.422	0.299	0.488	0.377	1	0	0	0	0	0	C3	C3	(a.219.1.1)*3
1sei_1	260	220	50	16	13	10.400	1.724	0.578	0.476	0.466	0.534	0	0	1	0	0	0	C2o=	C2	(d.140.1.1)*2
1ses_1	842	679	50	31	28	43.400	0.847	0.566	0.443	0.605	0.518	0	0	1	0	0	0	C2m=	C2	(a.2.7.1,d.104.1.1)*2
1sf8_1	236	218	32	26	15	12.480	0.780	0.574	0.451	0.595	0.523	0	0	1	0	0	0	C2o=	C2	(d.271.1.1)*2
1sf9_1	118	102	23	17	14	5.474	0.742	0.513	0.425	0.643	0.479	0	0	1	0	0	0	A1o	A	(b.34.15.1)*1
1sfk_2	277	266	38	23	15	13.110	1.000	0.611	0.506	0.448	0.561	0	0	1	1	0	0	D2	D2	(a.190.1.1)*4
1sfp_1	222	212	30	24	14	10.080	0.789	0.562	0.502	0.452	0.542	0	0	1	1	0	0	C2o=	C2	(b.23.1.1)*2
1sg1_1	361	322	48	25	17	20.400	1.143	0.466	0.391	0.350	0.432	0	1	0	0	0	0	A3	A	(g.17.1.3)*2+(g.24.1.1,g.24.1.1,g.24.1.1,g.24.1.1)*1
1sg2_1	392	380	49	27	27	35.721	0.907	0.147	0.238	0.001	0.195	1	0	0	0	1	0	C3	C3	(f.48.1.1)*3
1sg3_1	1902	1893	62	62	39	149.916	0.614	0.306	0.333	0.006	0.313	0	1	0	0	1	0	D3	D3	(b.18.1.22,b.18.1.22)*6
1sgp_1	236	235	29	22	16	10.208	0.763	0.601	0.506	0.674	0.563	0	0	1	1	0	0	A2	A	(b.47.1.1)*1+(g.68.1.1)*1
1shs_1	2760	2760	60	59	59	208.860	0.508	0.000	0.234	0.000	0.130	1	0	0	0	1	0	TOI	O	(b.15.1.1)*24
1shy_1	727	665	50	31	28	43.400	0.847	0.456	0.402	0.535	0.438	0	1	0	0	0	0	A2	A	(b.47.1.2)*1+(b.69.12.1,g.16.2.1)*1
1sj1_1	132	123	28	14	14	5.488	1.000	0.552	0.468	0.718	0.517	0	0	1	0	0	0	C2o=	C2	(d.58.1.4)*2
1sjw_1	568	540	39	30	27	31.590	0.684	0.487	0.449	0.297	0.484	0	1	0	0	0	0	D2	D2	(d.17.4.9)*4
1skv_1	125	121	33	14	12	5.544	1.269	0.593	0.536	0.398	0.575	0	0	1	1	0	0	C2o=	C2	(a.30.5.1)*2
1skz_1	208	194	39	20	17	13.260	1.054	0.553	0.380	0.457	0.469	0	0	1	0	0	0	C2m=	C2	(g.3.15.1,g.3.15.1)*2
1slm_1	452	424	43	28	21	25.284	0.878	0.499	0.419	0.629	0.472	0	1	0	0	0	0	C2m=	C2	(a.20.1.2,d.92.1.11)*2
1slq_1	805	787	44	37	36	58.608	0.603	0.407	0.347	0.552	0.388	0	1	0	0	0	0	C3	C3	(f.47.1.1)*3
1snn_1	438	436	34	27	23	21.114	0.680	0.555	0.513	0.361	0.544	0	0	1	1	0	0	C2o=	C2	(d.115.1.2)*2
1sox_1	921	847	61	32	28	54.656	1.017	0.538	0.411	0.542	0.483	0	0	1	0	0	0	C2m=	C2	(d.120.1.1,d.176.1.1,b.1.18.6)*2
1sq0_1	463	452	36	33	20	23.760	0.679	0.506	0.459	0.324	0.486	0	0	1	0	0	0	A2	A	(c.10.2.7)*1+(c.62.1.1)*1
1sq2_1	241	233	39	19	14	10.374	1.182	0.612	0.509	0.539	0.566	0	0	1	1	0	0	A2	A	(b.1.1.1)*1+(d.2.1.2)*1
1sqg_1	424	401	42	26	21	22.932	0.894	0.491	0.443	0.481	0.474	0	1	0	0	0	0	A1m	A	(a.79.1.3,c.66.1.38)*1
1sqj_1	1541	1386	104	32	29	96.512	1.705	0.503	0.381	0.536	0.454	0	0	1	0	0	0	C2m=	C2	(b.69.13.1,b.69.13.1)*2
1sqq_1	4208	3944	96	67	51	328.032	0.814	0.367	0.325	0.227	0.350	0	1	0	0	0	0	C2m≠	C2	(a.3.1.3,f.23.11.0)*2+(d.184.1.3)*2+(d.185.1.1,d.185.1.0)*2+(d.185.1.1,d.185.1.1)*2+(f.21.1.2,f.32.1.0)*2+(f.23.12.0,b.33.1.1)*2+(f.23.13.1)*2+(f.23.14.1)*2+(f.23.15.1)*2+(f.27.1.1)*2+(f.28.1.1)*2
1squ_1	306	285	31	21	20	13.020	0.756	0.558	0.501	0.446	0.540	0	0	1	1	0	0	C2o=	C2	(d.252.1.1)*2
1sr4_1	579	561	40	32	24	30.720	0.714	0.586	0.479	0.527	0.543	0	0	1	0	0	0	A3	A	(b.42.2.1)*2+(d.151.1.1)*1
1sr8_1	282	269	36	25	15	13.500	0.900	0.486	0.464	0.263	0.487	0	1	0	0	0	0	A1o	A	(e.54.1.1)*1
1srq_1	634	599	70	34	23	54.740	1.228	0.316	0.285	0.296	0.309	1	0	0	0	0	0	C2o=	C2	(e.55.1.1)*2
1ssm_1	1440	1440	63	34	34	72.828	0.926	0.522	0.495	0.176	0.517	0	0	1	0	0	0	D3	D3	(b.81.1.6)*6
1st6_1	1049	969	58	44	31	79.112	0.773	0.412	0.326	0.335	0.377	0	1	0	0	0	0	A1m	A	(a.24.9.1,a.24.9.1,a.24.9.1,a.24.9.1,a.24.9.1,a.24.9.1,a.24.9.1,a.24.9.1)*1
1su3_2	416	393	45	24	21	22.680	1.000	0.533	0.437	0.623	0.493	0	0	1	0	0	0	A1m	A	(a.20.1.2,d.92.1.11,b.66.1.1)*1
1sum_1	225	214	37	21	12	9.324	1.121	0.633	0.542	0.608	0.594	0	0	1	1	0	0	A1o	A	(a.7.12.1)*1
1suw_1	996	792	44	37	35	56.980	0.611	0.537	0.392	0.282	0.472	0	0	1	0	0	0	D2	D2	(e.52.1.1)*4
1svd_1	553	507	50	27	23	31.050	1.000	0.579	0.433	0.597	0.518	0	0	1	0	0	0	A2	A	(d.58.9.1,c.1.14.1)*1+(d.73.1.1)*1
1syx_1	197	193	33	18	16	9.504	0.971	0.592	0.518	0.619	0.562	0	0	1	1	0	0	A2	A	(c.47.1.8)*1+(d.76.1.1)*1
1sz6_1	1024	964	93	29	21	56.637	1.860	0.555	0.436	0.617	0.506	0	0	1	0	0	0	C2m≠	C2	(b.42.2.1,b.42.2.1)*2+(d.165.1.1)*2
1szh_1	147	136	28	17	15	7.140	0.875	0.606	0.477	0.694	0.554	0	0	1	0	0	0	A1o	A	(a.226.1.1)*1
1szi_1	194	174	39	17	13	8.619	1.300	0.519	0.477	0.485	0.503	0	0	1	0	0	0	A1o	A	(a.24.23.1)*1
1szq_1	946	858	61	31	28	52.948	1.034	0.551	0.437	0.405	0.505	0	0	1	0	0	0	C2o=	C2	(e.44.1.1)*2
1t07_1	81	77	23	14	12	3.864	0.885	0.572	0.500	0.565	0.555	0	0	1	1	0	0	A1o	A	(d.279.1.1)*1
1t0b_2	964	918	40	39	34	53.040	0.548	0.569	0.466	0.335	0.521	0	0	1	0	0	0	D2	D2	(c.23.16.6)*4
1t0h_1	283	249	42	19	17	13.566	1.167	0.553	0.472	0.656	0.527	0	0	1	0	0	0	A2	A	(b.34.2.1)*1+(c.37.1.1)*1
1t11_1	750	659	69	34	21	49.266	1.255	0.404	0.336	0.591	0.388	0	1	0	0	0	0	C2m=	C2	(d.241.2.1,d.26.1.1,a.223.1.1)*2
1t1d_1	400	384	33	32	23	24.288	0.600	0.524	0.453	0.208	0.500	0	0	1	0	0	0	C4+	C4	(d.42.1.2)*4
1t1e_1	534	514	37	27	25	24.975	0.712	0.593	0.487	0.624	0.552	0	0	1	0	0	0	A1m	A	(d.58.3.2,c.41.1.2)*1
1t35_1	1442	1408	52	51	35	92.820	0.605	0.366	0.370	0.126	0.376	0	1	0	0	1	0	D4+	D4	(c.129.1.1)*8
1t3g_1	303	299	41	21	19	16.359	1.025	0.552	0.495	0.659	0.541	0	0	1	0	0	0	C2o=	C2	(c.23.2.0)*2
1t4b_1	734	719	55	31	22	37.510	1.038	0.556	0.486	0.581	0.539	0	0	1	0	0	0	C2m=	C2	(c.2.1.3,d.81.1.1)*2
1t4o_2	88	78	27	13	9	3.159	1.227	0.633	0.568	0.543	0.617	0	0	1	1	0	0	A1o	A	(d.50.1.1)*1
1t5e_1	3003	2709	131	61	58	463.478	1.101	0.233	0.156	0.029	0.185	1	0	0	0	0	0	A4+	A	(f.46.1.1)*13
1t60_2	1349	1349	50	35	34	59.500	0.725	0.545	0.536	0.302	0.543	0	0	1	1	0	0	D3	D3	(d.169.1.6,d.169.1.6)*6
1t6a_1	124	110	49	19	13	12.103	1.531	0.360	0.236	0.408	0.305	1	0	0	0	0	0	A1o	A	(d.129.8.1)*1
1t6b_1	846	768	76	29	24	52.896	1.434	0.433	0.374	0.220	0.410	0	1	0	0	0	0	A2	A	(b.179.1.1,f.60.1.1)*1+(c.62.1.1)*1
1t6g_1	550	537	45	28	22	27.720	0.900	0.550	0.458	0.600	0.515	0	0	1	0	0	0	A2	A	(b.29.1.11)*1+(b.50.1.2)*1
1t6l_1	498	486	57	33	18	33.858	1.118	0.395	0.355	0.182	0.376	0	1	0	0	0	0	C2m=	C2	(d.131.1.2,d.131.1.2)*2
1t6s_1	324	284	53	24	18	22.896	1.262	0.490	0.346	0.555	0.428	0	1	0	0	0	0	C2m=	C2	(a.4.5.60,a.4.5.60)*2
1t6u_2	699	689	37	35	31	40.145	0.561	0.456	0.453	0.031	0.456	0	1	0	0	0	0	D3	D3	(a.24.22.1)*6
1t77_1	414	395	34	28	24	22.848	0.654	0.532	0.458	0.637	0.511	0	0	1	0	0	0	A1m	A	(b.55.1.6,a.169.1.1)*1
1t92_1	216	210	28	24	16	10.752	0.700	0.566	0.468	0.533	0.530	0	0	1	0	0	0	C2o=	C2	(d.24.1.3)*2
1t95_1	230	219	45	26	15	17.550	1.098	0.379	0.315	0.275	0.357	0	1	0	0	0	0	A1m	A	(d.235.1.2,a.5.8.1,d.58.11.3)*1
1t98_1	526	470	34	33	29	32.538	0.548	0.490	0.396	0.262	0.453	0	1	0	0	0	0	C2m=	C2	(a.4.5.65,a.47.6.1)*2
1t9g_1	1960	1762	72	45	39	126.360	0.857	0.453	0.362	0.480	0.410	0	1	0	0	0	0	A4+	A	(c.26.2.3)*2+(e.6.1.1,a.29.3.1)*4
1t9h_1	287	258	41	25	15	15.375	1.025	0.573	0.441	0.568	0.521	0	0	1	0	0	0	A1m	A	(b.40.4.5,c.37.1.8)*1
1tad_1	318	302	36	25	17	15.300	0.857	0.509	0.483	0.354	0.503	0	0	1	0	0	0	A1m	A	(c.37.1.8,a.66.1.1)*1
1taf_1	276	256	39	26	17	17.238	0.907	0.359	0.352	0.061	0.351	0	1	0	0	0	0	C2o=	C2	(a.22.1.3)*4
1taq_1	807	722	72	30	28	60.480	1.241	0.360	0.319	0.242	0.348	0	1	0	0	0	0	A1m	A	(c.120.1.2,a.60.7.1,c.55.3.5,e.8.1.1)*1
1tbg_1	1623	1493	62	56	29	100.688	0.729	0.440	0.371	0.056	0.395	0	1	0	0	0	0	D2	D2	(a.137.3.1)*4+(b.69.4.1)*4
1tco_1	628	604	59	30	21	37.170	1.157	0.525	0.443	0.553	0.497	0	0	1	0	0	0	A3	A	(a.39.1.5)*1+(d.159.1.3)*1+(d.26.1.1)*1
1td6_1	286	268	29	26	18	13.572	0.659	0.498	0.475	0.244	0.486	0	1	0	0	0	0	A1o	A	(a.234.1.1)*1
1tdj_1	988	960	48	45	29	62.640	0.649	0.471	0.391	0.490	0.442	0	1	0	0	0	0	C2m=	C2	(c.79.1.1,d.58.18.2,d.58.18.2)*2
1tdq_1	397	346	59	27	15	23.895	1.405	0.464	0.372	0.577	0.427	0	1	0	0	0	0	A2	A	(b.1.2.1,b.1.2.1,b.1.2.1)*1+(d.169.1.1)*1
1te0_1	954	822	54	53	19	54.378	0.750	0.503	0.385	0.425	0.459	0	0	1	0	0	0	C3	C3	(b.47.1.1,b.36.1.4)*3
1te1_1	464	447	40	26	23	23.920	0.816	0.523	0.458	0.420	0.493	0	0	1	0	0	0	A2	A	(b.29.1.11)*1+(c.1.8.5)*1
1tej_1	125	106	29	20	14	8.120	0.853	0.309	0.280	0.024	0.280	1	0	0	0	0	0	C2o=	C2	(g.20.1.1)*2
1tf5_1	775	711	57	42	23	55.062	0.877	0.425	0.344	0.554	0.392	0	1	0	0	0	0	A1m	A	(c.37.1.19,a.162.1.1,c.37.1.19,a.172.1.1)*1
1tfe_1	284	222	34	22	22	16.456	0.773	0.506	0.380	0.644	0.453	0	0	1	0	0	0	C2o=	C2	(d.43.1.1)*2
1tg8_1	780	706	94	30	16	45.120	2.043	0.486	0.411	0.547	0.464	0	1	0	0	0	1	C2m=	C2	(f.10.1.1,b.1.18.4)*2
1tgr_1	52	52	19	13	10	2.470	0.826	0.509	0.444	0.674	0.485	0	0	1	0	0	0	A1o	A	(g.1.1.1)*1
1th7_1	1092	1092	52	35	34	61.880	0.754	0.405	0.400	0.011	0.387	0	1	0	0	0	0	D4+	D7	(b.38.1.1)*14
1tid_1	507	469	52	29	21	31.668	1.040	0.479	0.386	0.494	0.441	0	1	0	0	0	0	C2o≠	C2	(c.13.2.1)*2+(d.122.1.3)*2
1tif_1	76	69	19	15	12	3.420	0.704	0.599	0.492	0.613	0.560	0	0	1	0	0	0	A1o	A	(d.15.8.1)*1
1tig_1	88	86	23	14	10	3.220	0.958	0.602	0.547	0.482	0.573	0	0	1	1	0	0	A1o	A	(d.68.1.1)*1
1tj7_1	906	696	52	40	28	58.240	0.765	0.507	0.343	0.405	0.435	0	0	1	0	0	0	C2o=	C2	(a.127.1.1)*2
1tjf_2	186	185	32	18	15	8.640	0.970	0.605	0.527	0.533	0.581	0	0	1	1	0	0	A1o	A	(a.192.1.1)*1
1tjl_1	145	120	37	17	12	7.548	1.276	0.511	0.412	0.657	0.471	0	0	1	0	0	0	A1m	A	(a.2.14.1,g.39.1.13)*1
1tjx_1	157	150	27	17	15	6.885	0.844	0.602	0.533	0.604	0.581	0	0	1	1	0	0	A1o	A	(b.7.1.2)*1
1tke_1	224	217	33	21	15	10.395	0.917	0.569	0.498	0.709	0.546	0	0	1	0	0	0	A1m	A	(d.15.10.1,d.67.1.1)*1
1tlj_1	377	357	36	31	19	21.204	0.720	0.523	0.451	0.381	0.498	0	0	1	0	0	0	C2o=	C2	(d.282.1.1)*2
1tll_1	1246	1206	52	45	34	79.560	0.658	0.426	0.404	0.339	0.433	0	1	0	0	0	0	C2m=	C2	(c.23.5.2,b.43.4.1,c.25.1.4)*2
1tlu_1	234	232	27	20	17	9.180	0.730	0.616	0.576	0.515	0.604	0	0	1	1	0	0	C2o=	C2	(d.156.1.2)*2
1tly_1	251	232	34	22	18	13.464	0.850	0.454	0.438	0.210	0.452	0	1	0	0	0	0	A1o	A	(f.4.6.1)*1
1tmq_1	588	548	44	29	23	29.348	0.846	0.575	0.476	0.488	0.538	0	0	1	0	0	0	A2	A	(a.52.1.2)*1+(c.1.8.1,b.71.1.1)*1
1to2_1	345	334	31	23	20	14.260	0.721	0.610	0.531	0.644	0.585	0	0	1	1	0	0	A2	A	(c.41.1.1)*1+(d.40.1.1)*1
1to6_1	742	680	66	32	20	42.240	1.269	0.418	0.385	0.501	0.415	0	1	0	0	0	0	C2o=	C2	(c.141.1.1)*2
1tol_1	157	151	26	20	13	6.760	0.788	0.578	0.502	0.679	0.554	0	0	1	1	0	0	A1m	A	(b.37.1.1,d.212.1.1)*1
1tqg_1	105	103	28	13	12	4.368	1.120	0.580	0.551	0.508	0.580	0	0	1	1	0	0	A1o	A	(a.24.10.3)*1
1tr0_1	1272	1272	51	51	31	80.631	0.622	0.261	0.377	0.000	0.311	1	0	0	0	1	0	D4+	D6	(d.58.4.4)*12
1trb_1	632	594	48	30	22	31.680	0.923	0.535	0.467	0.576	0.513	0	0	1	0	0	0	C2m=	C2	(c.3.1.5,c.3.1.5)*2
1ts9_1	98	93	26	14	11	4.004	1.040	0.596	0.519	0.663	0.569	0	0	1	1	0	0	A1o	A	(b.137.1.1)*1
1tt7_1	1974	1952	58	57	40	132.240	0.598	0.409	0.370	0.021	0.383	0	1	0	0	0	0	D3	D3	(b.35.1.2,c.2.1.1)*6
1tt8_1	164	162	22	20	17	7.480	0.595	0.565	0.537	0.566	0.563	0	0	1	1	0	0	A1o	A	(d.190.1.1)*1
1tu1_1	288	271	32	25	20	16.000	0.711	0.451	0.411	0.673	0.443	0	1	0	0	0	0	C2o=	C2	(d.107.1.3)*2
1tua_1	189	162	31	21	12	7.812	0.939	0.608	0.513	0.645	0.573	0	0	1	1	0	0	A1m	A	(d.51.1.1,d.51.1.1)*1
1tue_2	398	377	37	33	21	25.641	0.685	0.439	0.395	0.398	0.428	0	1	0	0	0	0	A2	A	(b.91.1.1)*1+(c.37.1.20)*1
1tug_1	2778	2565	63	62	50	195.300	0.562	0.340	0.338	0.083	0.338	0	1	0	0	0	0	D3	D3	(c.78.1.1)*6+(d.58.2.1,g.41.7.1)*6
1tx4_1	370	351	38	26	20	19.760	0.826	0.564	0.474	0.593	0.535	0	0	1	0	0	0	A2	A	(a.116.1.1)*1+(c.37.1.8)*1
1tx6_2	560	534	53	24	21	26.712	1.178	0.522	0.460	0.317	0.497	0	0	1	0	0	0	A3	A	(b.47.1.2)*2+(g.3.13.1,g.3.13.1)*1
1txk_1	490	450	44	26	24	27.456	0.880	0.568	0.447	0.572	0.521	0	0	1	0	0	0	A1m	A	(b.30.5.9,b.1.18.2)*1
1txu_1	254	236	41	22	15	13.530	1.108	0.584	0.469	0.582	0.542	0	0	1	0	0	0	A1o	A	(a.222.1.1)*1
1ty0_1	418	385	39	28	23	25.116	0.765	0.517	0.437	0.551	0.495	0	0	1	0	0	0	C2m=	C2	(b.40.2.2,d.15.6.1)*2
1tyg_1	1216	894	48	47	25	56.400	0.667	0.505	0.413	0.197	0.466	0	0	1	0	0	0	D2	D2	(c.1.31.1)*4+(d.15.3.2)*4
1tzb_1	601	587	38	30	25	28.500	0.691	0.545	0.520	0.260	0.540	0	0	1	1	0	0	C2o=	C2	(c.80.1.1)*2
1tzi_1	1066	1028	121	27	24	78.408	2.373	0.429	0.345	0.371	0.392	0	1	0	0	0	1	C2m≠	C2	(b.1.1.1,b.1.1.2)*4+(g.17.1.1)*2
1tzo_1	3871	3718	80	79	50	316.000	0.620	0.344	0.309	0.046	0.326	0	1	0	0	0	0	C4+	C7	(b.179.1.1,f.60.1.1)*7
1tzp_1	476	439	60	23	17	23.460	1.500	0.578	0.471	0.679	0.535	0	0	1	0	0	0	C2o=	C2	(d.65.1.3)*2
1tzv_1	141	133	24	17	15	6.120	0.750	0.612	0.541	0.653	0.590	0	0	1	1	0	0	A1o	A	(a.79.1.1)*1
1u07_1	178	168	44	21	11	10.164	1.375	0.423	0.381	0.368	0.411	0	1	0	0	0	0	C2o=	C2	(d.212.1.2)*2
1u0n_1	731	676	49	33	28	45.276	0.803	0.467	0.396	0.553	0.440	0	1	0	0	0	0	A4+	A	(c.10.2.7)*1+(c.62.1.1)*1+(d.169.1.1)*2
1u0s_1	204	201	30	19	17	9.690	0.833	0.566	0.495	0.614	0.540	0	0	1	0	0	0	A2	A	(c.23.1.1)*1+(d.58.24.1)*1
1u2c_1	228	211	41	19	15	11.685	1.206	0.584	0.441	0.608	0.522	0	0	1	0	0	0	A1m	A	(b.1.6.2,d.272.1.1)*1
1u4q_1	318	303	95	14	12	15.960	3.654	0.614	0.472	0.667	0.551	0	0	1	0	0	1	A1m	A	(a.7.1.1,a.7.1.1,a.7.1.1)*1
1u5p_1	211	205	63	14	12	10.584	2.423	0.604	0.487	0.768	0.559	0	0	1	0	0	1	A1m	A	(a.7.1.1,a.7.1.1)*1
1u5t_1	738	650	68	40	26	70.720	1.030	0.373	0.265	0.397	0.325	1	0	0	0	0	0	A4+	A	(a.4.5.54,a.4.5.54)*4
1u5u_1	366	350	29	27	24	18.792	0.569	0.558	0.486	0.510	0.533	0	0	1	0	0	0	A1o	A	(e.5.1.2)*1
1u61_1	127	112	21	17	14	4.998	0.677	0.591	0.510	0.572	0.563	0	0	1	1	0	0	A1o	A	(a.149.1.1)*1
1u6g_1	1949	1832	82	50	40	164.000	0.911	0.317	0.292	0.466	0.315	1	0	0	0	0	0	A3	A	(a.118.1.2)*1+(a.118.17.1,e.40.1.1,a.4.5.34)*1+(g.44.1.1)*1
1u6z_1	998	964	61	40	25	61.000	0.938	0.453	0.414	0.562	0.446	0	1	0	0	0	0	C2m=	C2	(c.55.1.8,c.55.1.8,a.211.1.5)*2
1u7g_1	1149	1113	41	41	32	53.792	0.562	0.625	0.522	0.519	0.587	0	0	1	1	0	0	C3	C3	(f.44.1.1)*3
1u7k_1	786	767	47	46	24	51.888	0.671	0.505	0.394	0.121	0.443	0	0	1	0	0	0	C4+	C6	(a.73.1.1)*6
1u7l_1	364	333	70	25	15	26.250	1.750	0.437	0.338	0.501	0.393	0	1	0	0	0	0	A1o	A	(e.57.1.1)*1
1u7v_1	602	587	39	37	21	30.303	0.672	0.502	0.479	0.306	0.498	0	0	1	0	0	0	C3	C3	(b.26.1.1)*3
1u7z_2	438	422	46	23	21	22.218	1.045	0.483	0.452	0.390	0.479	0	1	0	0	0	0	C2o=	C2	(c.72.3.1)*2
1u84_1	81	81	20	15	11	3.300	0.769	0.612	0.571	0.464	0.604	0	0	1	1	0	0	A1o	A	(a.230.1.1)*1
1u8v_1	1960	1826	56	51	41	117.096	0.609	0.534	0.416	0.284	0.482	0	0	1	0	0	0	D2	D2	(e.6.1.1,a.29.3.1)*4
1u98_1	1866	1652	76	62	35	164.920	0.784	0.247	0.258	0.067	0.256	1	0	0	0	1	0	A4+	A	(c.37.1.11,d.48.1.1)*6
1u9t_1	654	626	54	32	25	43.200	0.947	0.421	0.367	0.279	0.401	0	1	0	0	0	0	A2	A	(e.62.1.1)*2
1u9y_1	1096	1068	49	38	35	65.170	0.671	0.443	0.406	0.083	0.423	0	1	0	0	0	0	D2	D2	(c.61.1.2,c.61.1.2)*4
1uan_1	1317	1293	47	41	41	79.007	0.573	0.451	0.431	0.041	0.441	0	1	0	0	0	0	D3	D3	(c.134.1.1)*6
1ub4_1	556	518	66	23	22	33.396	1.467	0.483	0.406	0.585	0.460	0	1	0	0	0	0	C2o≠	C2	(b.129.1.1)*2+(b.34.6.2)*4
1ucd_1	190	180	26	18	16	7.488	0.765	0.633	0.561	0.715	0.609	0	0	1	1	0	0	A1o	A	(d.124.1.1)*1
1ucs_1	64	63	17	11	10	1.870	0.810	0.587	0.603	0.530	0.601	0	0	1	1	1	0	A1o	A	(b.85.1.1)*1
1ud9_1	242	233	33	19	18	11.286	0.892	0.577	0.495	0.532	0.547	0	0	1	0	0	0	A1m	A	(d.131.1.2,d.131.1.2)*1
1udv_1	174	153	29	16	15	6.960	0.935	0.611	0.522	0.511	0.570	0	0	1	1	0	0	C2o=	C2	(d.68.6.1)*2
1udx_1	412	348	64	24	13	19.968	1.730	0.542	0.419	0.577	0.488	0	0	1	0	0	0	A1m	A	(b.117.1.1,c.37.1.8,d.242.1.1)*1
1ueb_1	184	159	41	21	11	9.471	1.281	0.486	0.414	0.327	0.458	0	1	0	0	0	0	A1m	A	(b.34.5.2,b.40.4.5,b.40.4.5)*1
1uf5_1	1212	1110	43	39	38	63.726	0.558	0.555	0.464	0.245	0.519	0	0	1	0	0	0	D2	D2	(d.160.1.2)*4
1ufb_1	254	248	33	20	18	11.880	0.868	0.621	0.521	0.648	0.581	0	0	1	1	0	0	C2o=	C2	(a.24.16.3)*2
1ufi_1	94	90	20	15	12	3.600	0.741	0.606	0.574	0.491	0.595	0	0	1	1	0	0	C2o=	C2	(a.30.4.1)*2
1ufy_1	363	357	26	26	24	16.224	0.520	0.566	0.535	0.391	0.561	0	0	1	1	0	0	C3	C3	(d.79.1.2)*3
1ug3_1	323	298	46	23	17	17.986	1.150	0.467	0.411	0.454	0.449	0	1	0	0	0	0	A1m	A	(a.118.1.14,a.118.1.14)*1
1ug9_1	1019	962	67	38	27	68.742	1.031	0.339	0.320	0.349	0.331	0	1	0	0	0	0	A1m	A	(b.30.5.5,a.102.1.5,b.1.18.2,b.1.9.3)*1
1ugh_1	305	296	29	26	19	14.326	0.644	0.574	0.511	0.388	0.549	0	0	1	1	0	0	A2	A	(c.18.1.1)*1+(d.17.5.1)*1
1ugi_1	83	82	20	16	10	3.200	0.769	0.593	0.534	0.782	0.579	0	0	1	1	0	0	A1o	A	(d.17.5.1)*1
1uj8_1	73	71	17	15	12	3.060	0.630	0.628	0.537	0.734	0.585	0	0	1	1	0	0	A1o	A	(a.159.5.1)*1
1ukl_1	998	916	54	41	34	75.276	0.720	0.279	0.298	0.419	0.296	1	0	0	0	1	0	A3	A	(a.118.1.1)*1+(a.38.1.1)*2
1ukv_1	639	591	47	29	25	34.075	0.870	0.541	0.442	0.616	0.501	0	0	1	0	0	0	A2	A	(c.3.1.3,d.16.1.6,c.3.1.3)*1+(c.37.1.8)*1
1ul1_1	1743	1546	81	65	39	205.335	0.779	0.243	0.200	0.073	0.221	1	0	0	0	0	0	A4+	A	(c.120.1.2,a.60.7.1)*3+(d.131.1.2,d.131.1.2)*3
1ulk_1	252	242	35	23	19	15.295	0.833	0.431	0.377	0.143	0.405	0	1	0	0	0	0	C2m=	C2	(g.3.1.1,g.3.1.1,g.3.1.1)*2
1ulr_1	87	85	20	13	12	3.120	0.800	0.610	0.584	0.588	0.608	0	0	1	1	0	0	A1o	A	(d.58.10.1)*1
1um0_1	1460	1426	53	43	34	77.486	0.688	0.558	0.471	0.332	0.522	0	0	1	0	0	0	D2	D2	(d.258.1.1)*4
1umd_1	1369	1265	47	44	33	68.244	0.610	0.581	0.485	0.534	0.546	0	0	1	0	0	0	C2m≠	C2	(c.36.1.11)*2+(c.36.1.7,c.48.1.2)*2
1umg_1	2872	2848	57	53	53	160.113	0.538	0.518	0.464	0.235	0.493	0	0	1	0	0	0	D4+	D4	(d.280.1.1)*8
1umr_1	1040	1016	75	71	20	106.500	0.824	0.068	0.232	0.000	0.166	1	0	0	0	1	0	C4+	C4	(d.169.1.1)*8
1un8_1	1084	1038	77	28	28	60.368	1.375	0.535	0.420	0.464	0.482	0	0	1	0	0	0	C2m=	C2	(c.119.1.2,a.208.1.1)*2
1unb_1	867	834	43	42	26	46.956	0.632	0.471	0.456	0.138	0.469	0	1	0	0	0	0	C3	C3	(b.82.2.1)*3
1unn_1	955	929	74	45	20	66.600	1.138	0.360	0.358	0.027	0.354	0	1	0	0	0	0	C2m≠	C2	(d.131.1.1,d.131.1.1,d.131.1.1)*2+(d.240.1.1)*2
1unq_1	118	104	23	18	13	5.382	0.742	0.635	0.504	0.622	0.574	0	0	1	1	0	0	A1o	A	(b.55.1.1)*1
1uoy_1	64	61	15	12	9	1.620	0.714	0.662	0.608	0.642	0.649	0	0	1	1	0	0	A1o	A	(g.3.19.1)*1
1up8_1	7164	7140	78	77	76	456.456	0.510	0.451	0.410	0.212	0.437	0	1	0	0	0	0	TOI	T	(a.111.1.2)*12
1upt_2	445	410	57	22	20	25.080	1.357	0.594	0.439	0.524	0.522	0	0	1	0	0	0	C2o≠	C2	(a.193.1.1)*2+(c.37.1.8)*2
1urj_2	1031	880	52	34	33	58.344	0.776	0.534	0.397	0.484	0.472	0	0	1	0	0	0	A1o	A	(e.58.1.1)*1
1us0_1	314	299	29	25	20	14.500	0.644	0.597	0.526	0.605	0.576	0	0	1	1	0	0	A1o	A	(c.1.7.1)*1
1us3_1	482	470	56	28	22	34.496	1.120	0.358	0.333	0.474	0.354	0	1	0	0	0	0	A1m	A	(b.18.1.11,c.1.8.3)*1
1us6_1	191	185	30	24	14	10.080	0.789	0.533	0.427	0.479	0.485	0	0	1	0	0	0	C2o=	C2	(a.2.13.1)*2
1us7_1	401	325	45	30	21	28.350	0.882	0.483	0.342	0.584	0.422	0	1	0	0	0	0	A2	A	(a.205.1.1)*1+(d.122.1.1)*1
1uso_1	157	151	26	19	15	7.410	0.765	0.579	0.511	0.599	0.558	0	0	1	1	0	0	C2o=	C2	(d.74.1.1)*2
1usv_3	397	375	42	33	16	22.176	0.857	0.523	0.440	0.573	0.490	0	0	1	0	0	0	A2	A	(d.14.1.8)*1+(d.83.2.1)*1
1usy_1	1910	1852	63	55	46	159.390	0.624	0.348	0.314	0.521	0.344	0	1	0	0	0	0	D2	D2	(c.94.1.1)*4+(d.104.1.1)*4
1ut1_1	419	409	37	37	18	24.642	0.673	0.347	0.392	0.079	0.373	0	1	0	0	1	0	C3	C3	(b.2.3.6)*3
1ut7_1	297	259	39	23	21	18.837	0.886	0.442	0.371	0.561	0.411	0	1	0	0	0	0	C2o=	C2	(b.143.1.1)*2
1ut9_1	605	593	41	29	25	29.725	0.759	0.616	0.517	0.646	0.577	0	0	1	1	0	0	A1m	A	(b.1.18.2,a.102.1.2)*1
1utd_1	774	774	46	43	21	41.538	0.719	0.415	0.429	0.063	0.411	0	1	0	0	1	0	C4+	C11	(b.82.5.1)*11
1utg_1	140	140	20	19	16	6.080	0.571	0.523	0.531	0.113	0.530	0	0	1	1	1	0	C2o=	C2	(a.101.1.1)*2
1utt_1	954	948	43	37	37	58.867	0.581	0.405	0.399	0.116	0.403	0	1	0	0	0	0	D3	D3	(d.92.1.11)*6
1uty_1	306	297	38	26	17	16.796	0.884	0.552	0.461	0.493	0.521	0	0	1	0	0	0	C2o=	C2	(b.147.1.1)*2
1uuj_2	157	142	37	18	12	7.992	1.233	0.581	0.461	0.588	0.526	0	0	1	0	0	0	C2o=	C2	(a.221.1.1)*2
1uun_1	1472	1472	60	46	46	126.960	0.652	0.085	0.238	0.000	0.173	1	0	0	0	1	0	C4+	C8	(f.6.1.2)*8
1uus_1	930	870	119	25	20	59.500	2.644	0.490	0.377	0.551	0.444	0	1	0	0	0	1	C2m=	C2	(a.47.1.1,b.2.5.5,d.93.1.1)*2
1uux_1	483	480	36	35	20	25.200	0.655	0.541	0.464	0.237	0.507	0	0	1	0	0	0	C3	C3	(c.57.1.1)*3
1uuz_1	259	248	30	22	17	11.220	0.769	0.556	0.514	0.509	0.554	0	0	1	1	0	0	A2	A	(d.2.1.2)*1+(d.233.1.1)*1
1uv7_1	150	149	25	18	16	7.200	0.735	0.564	0.486	0.432	0.529	0	0	1	0	0	0	C2o=	C2	(d.67.4.1)*2
1uw4_1	339	307	35	28	20	19.600	0.729	0.554	0.431	0.524	0.497	0	0	1	0	0	0	A2	A	(a.118.1.14)*1+(d.58.7.4)*1
1uwk_1	1107	1089	55	35	28	53.900	0.873	0.588	0.505	0.519	0.560	0	0	1	1	0	0	C2o=	C2	(e.51.1.1)*2
1uwv_1	418	384	39	36	17	23.868	0.736	0.484	0.415	0.376	0.457	0	1	0	0	0	0	A1m	A	(b.40.4.12,c.66.1.40)*1
1ux5_1	822	738	75	47	21	74.025	1.103	0.209	0.255	0.006	0.233	1	0	0	0	1	0	C2o=	C2	(a.207.1.1)*2
1ux6_1	335	317	39	23	19	17.043	0.929	0.579	0.477	0.576	0.540	0	0	1	0	0	0	A1m	A	(g.75.1.1,b.29.1.16)*1
1uxy_1	340	320	31	30	19	17.670	0.633	0.518	0.463	0.261	0.501	0	0	1	0	0	0	A1m	A	(d.145.1.2,d.146.1.1)*1
1uyj_1	819	561	42	41	41	70.602	0.512	0.370	0.237	0.332	0.309	1	0	0	0	0	0	C3	C3	(f.8.1.2)*3
1uyn_1	279	270	41	18	16	11.808	1.206	0.481	0.470	0.707	0.495	0	1	0	0	0	0	A1o	A	(f.4.5.1)*1
1uz3_1	199	164	30	19	15	8.550	0.882	0.602	0.487	0.645	0.559	0	0	1	0	0	0	C2o=	C2	(a.283.1.1)*2
1uzb_1	3096	3066	62	61	59	223.138	0.517	0.440	0.373	0.080	0.408	0	1	0	0	0	0	D3	D3	(c.82.1.1)*6
1uzk_1	152	144	36	16	12	6.912	1.286	0.599	0.488	0.633	0.556	0	0	1	0	0	0	A1m	A	(g.3.11.1,g.23.1.1,g.3.11.1)*1
1v0w_1	496	484	37	28	22	22.792	0.740	0.590	0.516	0.657	0.567	0	0	1	1	0	0	A1m	A	(d.136.1.2,d.136.1.2)*1
1v1h_1	305	266	58	16	15	13.920	1.871	0.602	0.471	0.444	0.545	0	0	1	0	0	0	C3	C3	(b.83.1.1,h.1.17.1)*3
1v3w_1	519	516	29	29	27	22.707	0.518	0.600	0.527	0.522	0.573	0	0	1	1	0	0	C3	C3	(b.81.1.5)*3
1v4a_1	429	416	41	32	17	22.304	0.837	0.569	0.479	0.591	0.536	0	0	1	0	0	0	A1m	A	(d.218.1.9,a.24.16.4)*1
1v4p_3	155	149	24	21	14	7.056	0.686	0.567	0.515	0.489	0.553	0	0	1	1	0	0	A1o	A	(d.67.1.2)*1
1v5i_1	351	337	36	22	19	15.048	0.878	0.623	0.510	0.649	0.578	0	0	1	1	0	0	A2	A	(c.41.1.1)*1+(d.58.3.2)*1
1v5v_1	798	755	53	29	29	44.573	0.914	0.496	0.446	0.599	0.488	0	1	0	0	0	0	C2m=	C2	(d.250.1.1,b.44.2.1)*2
1v6s_1	390	376	41	23	21	19.803	0.932	0.490	0.447	0.445	0.479	0	1	0	0	0	0	A1o	A	(c.86.1.1)*1
1v70_1	210	200	25	20	17	8.500	0.676	0.610	0.540	0.412	0.581	0	0	1	1	0	0	C2o=	C2	(b.82.1.9)*2
1v74_1	194	190	26	21	18	9.828	0.667	0.577	0.495	0.616	0.547	0	0	1	0	0	0	A2	A	(a.24.20.1)*1+(d.243.1.1)*1
1v7p_1	454	423	41	36	17	25.092	0.774	0.552	0.443	0.414	0.506	0	0	1	0	0	0	A3	A	(c.62.1.1)*1+(d.169.1.1)*2
1v7z_1	1542	1537	53	52	31	85.436	0.639	0.513	0.465	0.216	0.498	0	0	1	0	0	0	D3	D3	(c.125.1.1)*6
1v8c_2	330	328	35	29	17	17.255	0.761	0.491	0.446	0.558	0.469	0	1	0	0	0	0	C2m=	C2	(d.15.3.1,d.129.5.1)*2
1v8d_1	562	552	49	46	16	36.064	0.790	0.445	0.389	0.195	0.420	0	1	0	0	0	0	C3	C3	(c.140.1.1)*3
1v97_1	2594	2489	91	49	34	151.606	1.096	0.516	0.432	0.473	0.487	0	0	1	0	0	0	C2m=	C2	(d.15.4.2,a.56.1.1,d.145.1.3,d.87.2.1,d.41.1.1,d.133.1.1)*2
1v9d_1	1207	1193	62	48	40	119.040	0.705	0.151	0.249	0.000	0.203	1	0	0	0	1	0	D2	D2	(a.207.1.1)*4
1v9m_1	312	310	29	25	23	16.675	0.604	0.532	0.461	0.516	0.502	0	0	1	0	0	0	A1o	A	(f.40.1.1)*1
1v9p_1	584	510	55	36	20	39.600	0.982	0.394	0.346	0.513	0.390	0	1	0	0	0	0	A1m	A	(d.142.2.2,b.40.4.6,a.60.2.2)*1
1va6_1	507	484	34	29	27	26.622	0.607	0.544	0.471	0.573	0.517	0	0	1	0	0	0	A1o	A	(d.128.1.4)*1
1vaj_1	203	200	29	20	17	9.860	0.784	0.569	0.486	0.643	0.536	0	0	1	0	0	0	A1o	A	(d.309.1.1)*1
1vb0_1	61	58	20	14	7	1.960	0.952	0.691	0.589	0.647	0.656	0	0	1	1	0	0	A1o	A	(g.7.1.1)*1
1vb5_1	549	496	52	26	22	29.744	1.083	0.570	0.459	0.534	0.526	0	0	1	0	0	0	C2o=	C2	(c.124.1.5)*2
1vbg_1	1748	1724	85	45	42	160.650	0.977	0.322	0.263	0.567	0.305	1	0	0	0	0	0	C2m=	C2	(d.142.1.5,c.8.1.1,c.1.12.2)*2
1vbk_1	603	534	68	28	19	36.176	1.447	0.530	0.404	0.354	0.467	0	0	1	0	0	0	C2m=	C2	(d.308.1.1,c.26.2.6)*2
1vbw_1	68	66	20	14	8	2.240	0.909	0.605	0.577	0.732	0.603	0	0	1	1	0	0	A1o	A	(d.40.1.1)*1
1vcc_1	77	76	19	17	10	3.230	0.704	0.602	0.533	0.630	0.575	0	0	1	1	0	0	A1o	A	(d.121.1.1)*1
1vcl_1	432	428	41	28	19	21.812	0.872	0.526	0.468	0.524	0.511	0	0	1	0	0	0	A1m	A	(b.42.2.1,b.42.2.1,d.281.1.1)*1
1vct_1	193	166	32	20	14	8.960	0.941	0.538	0.442	0.598	0.503	0	0	1	0	0	0	A1m	A	(a.7.12.1,d.286.1.1)*1
1vdd_1	791	709	63	44	19	52.668	1.000	0.308	0.326	0.009	0.312	0	1	0	0	1	0	D2	D2	(e.49.1.1)*4
1vdh_1	1235	1231	46	45	38	78.660	0.554	0.441	0.431	0.036	0.438	0	1	0	0	0	0	C4+	C5	(d.58.4.10)*5
1vdm_1	1778	1705	62	45	44	122.760	0.697	0.478	0.391	0.337	0.450	0	1	0	0	0	0	D3	D3	(c.61.1.1)*12
1ve1_1	604	580	39	32	25	31.200	0.684	0.561	0.473	0.411	0.528	0	0	1	0	0	0	C2o=	C2	(c.79.1.1)*2
1vfy_1	67	60	19	11	10	2.090	0.905	0.674	0.565	0.733	0.621	0	0	1	1	0	0	A1o	A	(g.50.1.1)*1
1vg9_4	675	620	46	34	25	39.100	0.780	0.526	0.416	0.598	0.481	0	0	1	0	0	0	A2	A	(c.3.1.3,d.16.1.6)*1+(c.37.1.8)*1
1vgg_1	966	949	39	34	32	42.432	0.591	0.537	0.517	0.181	0.521	0	0	1	1	0	0	D3	D3	(d.256.1.1)*6
1vh4_1	824	762	51	29	28	41.412	0.895	0.548	0.456	0.531	0.507	0	0	1	0	0	0	C2o=	C2	(b.80.6.1)*2
1vh6_1	210	194	36	18	16	10.368	1.059	0.524	0.476	0.296	0.510	0	0	1	0	0	0	C2o=	C2	(a.24.19.1)*2
1vhe_1	365	328	40	21	19	15.960	1.000	0.596	0.500	0.667	0.561	0	0	1	1	0	0	A1m	A	(c.56.5.4,b.49.3.1)*1
1vhh_1	157	153	23	19	15	6.555	0.676	0.652	0.569	0.699	0.617	0	0	1	1	0	0	A1o	A	(d.65.1.2)*1
1vhy_1	241	230	37	21	15	11.655	1.028	0.579	0.472	0.505	0.536	0	0	1	0	0	0	A1m	A	(b.122.1.2,c.116.1.5)*1
1vi5_1	198	184	28	20	15	8.400	0.800	0.622	0.533	0.588	0.589	0	0	1	1	0	0	A1o	A	(c.23.15.1)*1
1vj1_1	341	327	36	23	19	15.732	0.857	0.465	0.456	0.249	0.467	0	1	0	0	0	0	A1m	A	(b.35.1.2,c.2.1.1)*1
1vj7_1	326	310	40	24	19	18.240	0.930	0.491	0.424	0.571	0.463	0	1	0	0	0	0	A1m	A	(a.211.1.1,d.218.1.8)*1
1vjl_1	280	255	39	23	15	13.455	1.026	0.573	0.486	0.539	0.541	0	0	1	0	0	0	C2o=	C2	(d.257.1.1)*2
1vk0_1	1200	1188	51	50	27	68.850	0.662	0.387	0.434	0.021	0.402	0	1	0	0	1	0	C4+	C6	(c.55.3.5)*6
1vk1_1	232	221	30	21	17	10.710	0.789	0.552	0.494	0.454	0.528	0	0	1	0	0	0	A1o	A	(d.268.1.2)*1
1vk5_1	121	111	26	18	11	5.148	0.897	0.635	0.549	0.611	0.607	0	0	1	1	0	0	A1o	A	(a.220.1.1)*1
1vkm_1	876	833	42	41	28	48.216	0.609	0.526	0.447	0.350	0.497	0	0	1	0	0	0	C3	C3	(c.138.1.1)*3
1vkw_1	217	205	30	20	17	10.200	0.811	0.624	0.518	0.736	0.585	0	0	1	1	0	0	A1o	A	(d.90.1.2)*1
1vky_1	563	488	48	34	27	44.064	0.787	0.357	0.313	0.428	0.340	0	1	0	0	0	0	C2o=	C2	(e.53.1.1)*2
1vlb_1	907	830	42	36	29	43.848	0.646	0.601	0.478	0.626	0.548	0	0	1	0	0	0	A1m	A	(d.15.4.2,a.56.1.1,d.41.1.1,d.133.1.1)*1
1vli_1	358	350	37	25	20	18.500	0.822	0.550	0.465	0.463	0.515	0	0	1	0	0	0	A1m	A	(c.1.10.6,b.85.1.1)*1
1vlr_1	582	571	41	34	31	43.214	0.631	0.394	0.359	0.308	0.382	0	1	0	0	0	0	C2m=	C2	(d.246.1.1,d.13.1.3)*2
1vls_1	292	274	37	23	17	14.467	0.925	0.491	0.472	0.427	0.499	0	1	0	0	0	0	C2o=	C2	(a.24.2.1)*2
1vly_1	323	313	31	29	17	15.283	0.674	0.597	0.502	0.379	0.558	0	0	1	1	0	0	A1m	A	(d.250.1.1,b.44.2.1)*1
1vmo_1	163	153	26	16	15	6.240	0.839	0.601	0.553	0.511	0.586	0	0	1	1	0	0	A1o	A	(b.77.1.1)*1
1vok_1	192	171	39	16	14	8.736	1.300	0.503	0.457	0.547	0.495	0	0	1	0	0	0	A1m	A	(d.129.1.1,d.129.1.1)*1
1vp7_1	145	132	42	14	10	5.880	1.750	0.574	0.503	0.540	0.548	0	0	1	1	0	0	C2o=	C2	(a.7.13.1)*2
1vp8_1	1140	1122	49	49	21	50.421	0.700	0.594	0.514	0.411	0.557	0	0	1	1	0	0	D3	D3	(c.49.1.2)*6
1vpb_1	874	870	41	40	33	54.120	0.562	0.154	0.338	0.000	0.254	1	0	0	0	1	0	C2o=	C2	(d.283.1.1)*2
1vqq_1	635	551	76	26	21	41.496	1.617	0.480	0.364	0.627	0.434	0	1	0	0	0	0	A1m	A	(d.17.4.5,d.175.1.1,e.3.1.1)*1
1vqs_1	884	884	38	37	36	50.616	0.521	0.453	0.443	0.024	0.433	0	1	0	0	0	0	D4+	D4	(d.58.4.13)*8
1vr0_1	472	440	44	23	20	20.240	1.023	0.578	0.510	0.523	0.548	0	0	1	1	0	0	C2o=	C2	(c.148.1.1)*2
1vr4_1	480	460	29	28	27	21.924	0.527	0.513	0.480	0.217	0.496	0	0	1	0	0	0	C4+	C5	(d.230.5.0)*4+(d.230.5.1)*1
1vr8_1	135	131	20	19	16	6.080	0.571	0.623	0.542	0.586	0.596	0	0	1	1	0	0	A1o	A	(d.312.1.1)*1
1vrm_1	309	290	32	26	18	14.976	0.727	0.546	0.475	0.572	0.523	0	0	1	0	0	0	A1o	A	(d.96.2.1)*1
1vyh_1	1056	1003	62	37	31	71.114	0.912	0.393	0.360	0.280	0.382	0	1	0	0	0	0	C2o≠	C2	(b.69.4.1)*2+(c.23.10.3)*2
1vyi_1	111	104	25	15	12	4.500	0.926	0.621	0.553	0.717	0.600	0	0	1	1	0	0	A1o	A	(d.293.1.1)*1
1vz0_4	381	364	36	27	25	24.300	0.692	0.444	0.372	0.386	0.412	0	1	0	0	0	0	C2m=	C2	(d.268.1.1,a.4.14.1)*2
1vz8_1	755	706	55	31	20	34.100	1.078	0.549	0.494	0.440	0.535	0	0	1	0	0	0	C2o=	C2	(d.154.1.2)*2
1vzi_1	250	242	27	25	17	11.475	0.643	0.619	0.524	0.412	0.578	0	0	1	1	0	0	C2m=	C2	(g.41.5.2,b.1.13.1)*2
1vzy_1	1152	1038	51	43	26	57.018	0.739	0.491	0.430	0.268	0.461	0	1	0	0	0	0	C2m=	C2	(d.193.1.1,g.81.1.1)*4
1w07_1	1313	1285	51	41	36	75.276	0.662	0.506	0.444	0.488	0.486	0	0	1	0	0	0	C2m=	C2	(e.6.1.2,a.29.3.2,a.29.3.2)*2
1w0j_1	3056	2915	59	58	52	177.944	0.536	0.446	0.418	0.346	0.438	0	1	0	0	0	0	A4+	A	(b.49.1.1,c.37.1.11,a.69.1.1)*6+(c.49.2.1)*1
1w0p_1	753	711	66	25	24	39.600	1.347	0.563	0.467	0.558	0.526	0	0	1	0	0	0	A1m	A	(b.29.1.8,b.68.1.1,b.29.1.8)*1
1w1w_6	796	697	44	33	32	46.464	0.677	0.479	0.403	0.392	0.455	0	1	0	0	0	0	C2o≠	C2	(a.4.5.57)*2+(c.37.1.12)*2
1w23_1	717	667	48	31	25	37.200	0.857	0.553	0.474	0.477	0.525	0	0	1	0	0	0	C2o=	C2	(c.67.1.4)*2
1w25_1	908	854	49	41	33	66.297	0.662	0.426	0.332	0.187	0.379	0	1	0	0	0	0	C2m=	C2	(c.23.1.1,c.23.1.1,d.58.29.2)*2
1w26_1	432	398	60	33	27	53.460	1.000	0.184	0.183	0.139	0.191	1	0	0	0	0	0	A1m	A	(d.241.2.1,d.26.1.1,a.223.1.1)*1
1w3s_2	231	216	36	19	15	10.260	1.059	0.589	0.503	0.619	0.558	0	0	1	1	0	0	A1m	A	(b.40.4.13,g.45.1.2)*1
1w53_1	168	160	23	20	15	6.900	0.657	0.622	0.571	0.490	0.604	0	0	1	1	0	0	C2o=	C2	(a.186.1.2)*2
1w55_1	2214	2154	71	49	48	166.992	0.732	0.333	0.334	0.029	0.332	0	1	0	0	1	0	D3	D3	(c.68.1.13,d.79.5.1)*6
1w58_1	1014	936	57	56	22	70.224	0.731	0.449	0.334	0.241	0.392	0	1	0	0	0	0	C3	C3	(c.32.1.1,d.79.2.1)*3
1w5f_1	632	597	63	26	21	34.398	1.340	0.528	0.437	0.466	0.489	0	0	1	0	0	0	C2m=	C2	(c.32.1.1,d.79.2.1)*2
1w66_1	218	213	27	21	16	9.072	0.730	0.578	0.519	0.566	0.557	0	0	1	1	0	0	A1o	A	(d.104.1.3)*1
1w6s_1	1339	1254	66	33	32	69.696	1.015	0.511	0.460	0.520	0.497	0	0	1	0	0	0	C2o≠	C2	(a.137.2.1)*2+(b.70.1.1)*2
1w7i_1	895	815	72	33	27	64.152	1.200	0.461	0.342	0.551	0.414	0	1	0	0	0	0	A2	A	(a.39.1.5)*1+(b.34.3.0,c.37.1.9)*1
1w7j_1	1766	1550	88	50	36	158.400	1.023	0.393	0.276	0.120	0.329	1	0	0	0	0	0	C2m≠	C2	(a.39.1.5)*2+(b.34.3.1,c.37.1.9)*2
1w85_1	1414	1321	51	45	31	71.145	0.671	0.568	0.479	0.513	0.536	0	0	1	0	0	0	A4+	A	(a.9.1.1)*1+(c.36.1.11)*2+(c.36.1.7,c.48.1.2)*2
1w94_1	155	150	25	18	16	7.200	0.735	0.622	0.517	0.416	0.574	0	0	1	1	0	0	A1o	A	(c.51.1.2)*1
1w99_1	1674	1518	64	64	41	167.936	0.610	0.352	0.256	0.484	0.319	1	0	0	0	0	0	C3	C3	(f.1.3.1,b.77.2.1,b.18.1.3)*3
1w9g_1	103	92	24	19	11	5.016	0.800	0.574	0.458	0.534	0.520	0	0	1	0	0	0	A1o	A	(d.330.1.1)*1
1w9h_1	398	377	37	25	21	19.425	0.804	0.583	0.495	0.673	0.547	0	0	1	0	0	0	A1m	A	(c.44.3.1,c.55.3.15)*1
1w9q_1	163	159	33	16	13	6.864	1.138	0.561	0.505	0.609	0.542	0	0	1	1	0	0	A1m	A	(b.36.1.1,b.36.1.1)*1
1wa5_1	1586	1434	65	50	38	123.500	0.739	0.396	0.322	0.554	0.369	0	1	0	0	0	0	A3	A	(a.118.1.1)*2+(c.37.1.8)*1
1waa_1	552	534	36	36	22	28.512	0.621	0.461	0.445	0.137	0.463	0	1	0	0	0	0	D3	D3	(b.1.1.4)*6
1wao_1	471	445	37	31	21	24.087	0.712	0.579	0.475	0.545	0.535	0	0	1	0	0	0	A1m	A	(a.118.8.1,d.159.1.3)*1
1wbe_1	204	196	31	20	15	9.300	0.886	0.579	0.527	0.668	0.566	0	0	1	1	0	0	A1o	A	(a.224.1.1)*1
1wbh_1	640	612	42	40	23	38.640	0.667	0.554	0.399	0.526	0.485	0	0	1	0	0	0	C3	C3	(c.1.10.1)*3
1wc9_1	322	310	38	23	19	16.606	0.905	0.570	0.477	0.623	0.536	0	0	1	0	0	0	C2o=	C2	(d.278.1.2)*2
1wcw_1	254	242	38	19	17	12.274	1.056	0.526	0.468	0.339	0.502	0	0	1	0	0	0	A1o	A	(c.113.1.1)*1
1wde_1	289	277	39	22	18	15.444	0.975	0.488	0.430	0.492	0.468	0	1	0	0	0	0	A1o	A	(c.90.1.1)*1
1wdk_1	2199	2112	67	59	43	169.979	0.657	0.302	0.305	0.132	0.308	0	1	0	0	1	0	C2m≠	C2	(c.14.1.3,c.2.1.6,a.100.1.3,a.100.1.3)*2+(c.95.1.1,c.95.1.1)*2
1wej_1	541	518	57	26	21	31.122	1.213	0.490	0.419	0.497	0.463	0	1	0	0	0	0	A3	A	(a.3.1.1)*1+(b.1.1.1,b.1.1.2)*2
1wek_1	1240	1169	54	52	28	78.624	0.675	0.510	0.398	0.579	0.466	0	0	1	0	0	0	D3	D3	(c.129.1.1)*6
1wf3_1	296	269	34	23	18	14.076	0.829	0.561	0.483	0.493	0.531	0	0	1	0	0	0	A1m	A	(c.37.1.8,d.52.3.1)*1
1whi_1	244	222	43	17	16	11.696	1.303	0.590	0.471	0.604	0.539	0	0	1	0	0	0	C2o=	C2	(b.39.1.1)*2
1whz_1	70	69	16	15	10	2.400	0.640	0.591	0.588	0.420	0.592	0	0	1	1	0	0	A1o	A	(d.50.3.2)*1
1wj9_1	188	174	28	20	15	8.400	0.800	0.578	0.506	0.556	0.555	0	0	1	1	0	0	A1m	A	(d.58.53.1,d.58.53.1)*1
1wjx_1	112	106	21	17	13	4.641	0.700	0.599	0.528	0.547	0.572	0	0	1	1	0	0	A1o	A	(b.111.1.1)*1
1wky_1	446	443	42	23	22	21.252	0.933	0.573	0.490	0.672	0.539	0	0	1	0	0	0	A1m	A	(c.1.8.3,b.18.1.31)*1
1wlg_1	586	522	85	31	16	42.160	1.809	0.408	0.307	0.422	0.367	0	1	0	0	0	0	A2	A	(b.152.1.1)*2
1wls_1	656	640	44	28	27	33.264	0.800	0.560	0.482	0.349	0.530	0	0	1	0	0	0	C2o=	C2	(c.88.1.0)*2
1wm3_1	216	210	27	27	16	11.664	0.628	0.539	0.450	0.382	0.503	0	0	1	0	0	0	C3	C3	(d.15.1.1)*3
1wmd_1	434	427	36	24	21	18.144	0.800	0.621	0.548	0.600	0.594	0	0	1	1	0	0	A1m	A	(c.41.1.1,b.18.1.20)*1
1wmi_1	298	265	36	21	18	13.608	0.923	0.576	0.503	0.476	0.548	0	0	1	1	0	0	C2o≠	C2	(a.137.13.0)*1+(a.137.13.1)*1+(d.298.1.2)*2
1wn2_1	236	222	26	19	18	8.892	0.703	0.648	0.543	0.567	0.594	0	0	1	1	0	0	C2o=	C2	(c.131.1.0)*2
1wn9_1	127	125	18	17	14	4.284	0.581	0.606	0.580	0.653	0.597	0	0	1	1	0	0	A1o	A	(d.319.1.1)*1
1wnh_1	220	207	32	22	15	10.560	0.865	0.599	0.504	0.603	0.567	0	0	1	1	0	0	A1m	A	(d.17.1.0,d.17.1.5)*1
1wok_1	1400	1370	71	58	25	102.950	0.855	0.341	0.347	0.075	0.350	0	1	0	0	1	0	D2	D2	(a.41.1.0,d.166.1.0)*4
1wol_1	122	117	24	17	13	5.304	0.800	0.602	0.522	0.575	0.577	0	0	1	1	0	0	A1o	A	(a.24.16.0)*1
1wp5_1	323	312	32	25	21	16.800	0.696	0.481	0.458	0.201	0.475	0	1	0	0	0	0	A1o	A	(b.68.10.1)*1
1wpb_1	4032	4032	71	70	69	342.930	0.511	0.215	0.325	0.000	0.277	1	0	0	0	1	0	TOI	O	(a.233.1.1)*24
1wpv_1	882	870	43	41	24	42.312	0.662	0.543	0.508	0.307	0.537	0	0	1	1	0	0	D3	D3	(d.275.1.1)*6
1wpx_1	625	602	45	31	22	30.690	0.849	0.560	0.494	0.638	0.541	0	0	1	0	0	0	A2	A	(b.17.1.1)*1+(c.69.1.5)*1
1wqj_1	142	121	28	19	12	6.384	0.903	0.551	0.449	0.680	0.509	0	0	1	0	0	0	A2	A	(g.1.1.1)*1+(g.3.9.1)*1
1wqw_1	470	445	54	21	19	21.546	1.350	0.590	0.502	0.547	0.555	0	0	1	1	0	0	C2m=	C2	(d.104.1.2,b.34.1.1)*2
1wrd_1	174	159	31	22	14	9.548	0.861	0.526	0.423	0.487	0.489	0	0	1	0	0	0	A2	A	(a.7.8.1)*1+(d.15.1.1)*1
1wrv_1	897	814	49	47	24	55.272	0.690	0.520	0.396	0.412	0.465	0	0	1	0	0	0	C3	C3	(e.17.1.0)*3
1wta_1	819	744	46	46	23	48.668	0.667	0.514	0.393	0.452	0.459	0	0	1	0	0	0	C3	C3	(c.56.2.1)*3
1wub_1	176	170	33	18	15	8.910	1.000	0.514	0.452	0.226	0.482	0	0	1	0	0	0	A1o	A	(b.61.6.1)*1
1wv3_1	186	176	32	18	16	9.216	0.941	0.578	0.489	0.599	0.548	0	0	1	0	0	0	A1m	A	(b.26.1.4,b.26.1.4)*1
1wv8_1	142	124	28	16	13	5.824	0.966	0.574	0.509	0.590	0.556	0	0	1	1	0	0	C2o=	C2	(d.304.1.1)*2
1wvc_1	1524	1506	50	49	47	115.150	0.521	0.313	0.329	0.136	0.336	0	1	0	0	1	0	D3	D3	(c.68.1.13)*6
1wve_1	1180	1140	56	36	32	64.512	0.824	0.561	0.473	0.494	0.528	0	0	1	0	0	0	C2m≠	C2	(a.3.1.1)*2+(d.145.1.1,d.58.32.1)*2
1wvf_1	1030	962	49	38	28	52.136	0.742	0.554	0.493	0.463	0.539	0	0	1	0	0	0	C2m=	C2	(d.145.1.1,d.58.32.1)*2
1ww9_1	1167	1092	55	55	24	72.600	0.696	0.376	0.390	0.043	0.384	0	1	0	0	1	0	C3	C3	(b.33.1.2,d.129.3.3)*3
1wwi_1	148	144	27	15	15	6.075	0.900	0.583	0.533	0.579	0.567	0	0	1	1	0	0	A1o	A	(a.22.1.4)*1
1wxx_1	764	735	48	35	27	45.360	0.774	0.484	0.413	0.353	0.456	0	1	0	0	0	0	C2m=	C2	(b.122.1.9,c.66.1.51)*2
1wy6_1	159	154	36	16	12	6.912	1.286	0.608	0.542	0.632	0.584	0	0	1	1	0	0	A1o	A	(a.118.20.1)*1
1wyw_1	295	285	35	23	18	14.490	0.854	0.574	0.480	0.680	0.534	0	0	1	0	0	0	A2	A	(c.18.1.2)*1+(d.15.1.1)*1
1wzd_1	416	404	53	22	20	23.320	1.262	0.534	0.443	0.563	0.501	0	0	1	0	0	0	A2	A	(a.132.1.1)*2
1x0c_1	549	535	39	32	22	27.456	0.722	0.599	0.496	0.620	0.559	0	0	1	0	0	0	A1m	A	(b.133.1.0,b.80.1.0)*1
1x0g_1	427	415	40	32	19	24.320	0.784	0.521	0.415	0.390	0.475	0	0	1	0	0	0	C2o=	C2	(b.124.1.0)*4
1x0l_1	1318	1222	66	44	35	101.640	0.835	0.410	0.314	0.504	0.375	0	1	0	0	0	0	D2	D2	(c.77.1.0)*4
1x0p_1	1399	1397	56	55	39	120.120	0.596	0.304	0.326	0.000	0.311	0	1	0	0	1	0	D4+	D5	(d.58.10.2)*10
1x0u_1	3108	3066	67	66	42	185.724	0.620	0.453	0.433	0.120	0.450	0	1	0	0	0	0	D3	D3	(c.14.1.0,c.14.1.0)*6
1x3l_1	436	410	45	28	19	23.940	0.957	0.503	0.415	0.545	0.465	0	0	1	0	0	0	A1o	A	(c.118.1.0)*1
1x54_1	868	766	49	36	25	44.100	0.803	0.584	0.482	0.533	0.545	0	0	1	0	0	0	C2m=	C2	(b.40.4.0,d.104.1.0)*2
1x6i_1	176	174	30	16	15	7.200	0.968	0.563	0.552	0.425	0.568	0	0	1	1	0	0	C2o=	C2	(a.218.1.0)*2
1x6j_1	88	82	17	15	13	3.315	0.607	0.604	0.573	0.352	0.596	0	0	1	1	0	0	A1o	A	(a.218.1.0)*1
1x6m_1	390	369	47	22	21	21.714	1.093	0.469	0.417	0.303	0.445	0	1	0	0	0	0	C2o=	C2	(b.88.1.4)*2
1x6z_1	120	119	30	16	9	4.320	1.200	0.592	0.543	0.575	0.581	0	0	1	1	0	0	A1o	A	(d.24.1.1)*1
1x75_1	451	422	38	31	22	25.916	0.717	0.535	0.429	0.635	0.495	0	0	1	0	0	0	C2o≠	C2	(b.34.6.1)*2+(e.11.1.1)*2
1x7f_1	347	331	46	24	16	17.664	1.150	0.578	0.472	0.610	0.535	0	0	1	0	0	0	A1m	A	(c.1.8.12,b.62.1.2)*1
1x8p_1	184	183	23	21	17	8.211	0.605	0.553	0.512	0.231	0.534	0	0	1	1	0	0	A1o	A	(b.60.1.1)*1
1x8z_1	302	268	50	21	20	21.000	1.220	0.330	0.307	0.070	0.321	0	1	0	0	0	0	C2o=	C2	(a.29.6.1)*2
1x91_1	149	143	32	16	12	6.144	1.143	0.603	0.530	0.562	0.580	0	0	1	1	0	0	A1o	A	(a.29.6.1)*1
1x9j_1	2976	2872	83	78	34	220.116	0.741	0.331	0.333	0.008	0.323	0	1	0	0	1	0	D4+	D4	(c.55.1.2,c.55.1.2)*8
1x9y_1	346	327	36	24	20	17.280	0.818	0.584	0.500	0.331	0.550	0	0	1	1	0	0	A1m	A	(d.17.1.4,d.3.1.1)*1
1x9z_1	364	327	41	27	22	24.354	0.837	0.423	0.337	0.328	0.384	0	1	0	0	0	0	C2o=	C2	(d.292.1.1)*2
1xa6_1	399	367	45	29	17	22.185	0.978	0.490	0.416	0.510	0.462	0	1	0	0	0	0	A1m	A	(d.93.1.1,g.49.1.1,a.116.1.1)*1
1xak_1	68	65	21	13	10	2.730	0.913	0.591	0.540	0.723	0.584	0	0	1	1	0	0	A1o	A	(b.1.24.1)*1
1xbi_1	118	116	19	16	15	4.560	0.613	0.594	0.542	0.733	0.580	0	0	1	1	0	0	A1o	A	(d.79.3.1)*1
1xcf_1	952	853	66	39	25	64.350	1.031	0.442	0.342	0.571	0.400	0	1	0	0	0	0	A4+	A	(c.1.2.4)*4
1xck_1	3668	3668	81	80	49	317.520	0.628	0.220	0.273	0.001	0.243	1	0	0	0	1	0	C4+	C7	(a.129.1.1,d.56.1.1,c.8.5.1)*7
1xcr_1	313	307	27	25	21	14.175	0.587	0.583	0.530	0.579	0.568	0	0	1	1	0	0	A1o	A	(d.290.1.2)*1
1xd4_1	824	774	76	40	27	82.080	1.134	0.273	0.254	0.059	0.265	1	0	0	0	0	0	A1m	A	(a.87.1.1,b.55.1.1,a.117.1.1)*1
1xd5_1	112	110	19	18	11	3.762	0.655	0.626	0.599	0.500	0.622	0	0	1	1	0	0	A1o	A	(b.78.1.1)*1
1xdi_1	1836	1610	68	52	28	99.008	0.850	0.496	0.411	0.333	0.461	0	1	0	0	0	0	D2	D2	(c.3.1.5,d.87.1.1)*4
1xdp_1	1374	1296	65	45	31	90.675	0.855	0.353	0.392	0.085	0.376	0	1	0	0	1	0	C2m=	C2	(a.7.15.1,d.322.1.2,d.136.1.4,d.136.1.4)*2
1xdt_1	1118	1092	50	49	29	71.050	0.641	0.420	0.375	0.438	0.409	0	1	0	0	0	0	C2m≠	C2	(d.166.1.1,f.1.2.1,b.2.1.1)*2+(g.3.11.1)*2
1xeo_1	165	157	27	20	14	7.560	0.794	0.600	0.517	0.665	0.571	0	0	1	1	0	0	A1o	A	(d.167.1.1)*1
1xff_1	477	467	51	23	20	23.460	1.186	0.560	0.480	0.548	0.530	0	0	1	0	0	0	C2o=	C2	(d.153.1.1)*2
1xfi_1	343	326	32	25	21	16.800	0.696	0.558	0.489	0.544	0.534	0	0	1	0	0	0	A1o	A	(e.50.1.1)*1
1xfj_1	256	251	27	24	17	11.016	0.659	0.586	0.537	0.582	0.574	0	0	1	1	0	0	A1o	A	(d.194.1.2)*1
1xg0_1	494	483	40	30	21	25.200	0.784	0.511	0.453	0.353	0.485	0	0	1	0	0	0	A4+	A	(a.1.1.3)*2+(d.184.1.1)*2
1xg2_1	468	436	33	29	24	22.968	0.623	0.588	0.472	0.643	0.540	0	0	1	0	0	0	A2	A	(a.29.6.0)*1+(b.80.1.5)*1
1xhk_1	372	349	34	26	19	16.796	0.756	0.530	0.479	0.403	0.513	0	0	1	0	0	0	C2o=	C2	(d.14.1.10)*2
1xiz_2	156	151	20	19	17	6.460	0.556	0.574	0.547	0.726	0.579	0	0	1	1	0	0	A1o	A	(d.112.1.1)*1
1xjl_1	638	597	61	36	19	41.724	1.109	0.426	0.372	0.286	0.403	0	1	0	0	0	0	C2o=	C2	(a.65.1.1)*2
1xkp_1	477	445	54	24	19	24.624	1.256	0.526	0.441	0.478	0.491	0	0	1	0	0	0	A3	A	(a.243.1.3)*1+(d.198.1.1)*2
1xkr_1	205	198	27	21	16	9.072	0.730	0.571	0.515	0.623	0.555	0	0	1	1	0	0	A1o	A	(d.252.1.1)*1
1xly_1	408	384	38	30	18	20.520	0.792	0.575	0.503	0.508	0.552	0	0	1	1	0	0	C2o=	C2	(a.232.1.1)*2
1xmk_1	79	72	16	15	12	2.880	0.593	0.597	0.544	0.570	0.580	0	0	1	1	0	0	A1o	A	(a.4.5.19)*1
1xov_1	315	294	55	20	16	17.600	1.528	0.547	0.427	0.566	0.497	0	0	1	0	0	0	A1m	A	(c.56.5.6,b.34.11.4)*1
1xpc_1	490	460	34	28	28	26.656	0.607	0.560	0.463	0.572	0.520	0	0	1	0	0	0	C2o=	C2	(a.123.1.1)*2
1xpp_1	397	353	50	32	18	28.800	1.000	0.403	0.339	0.461	0.377	0	1	0	0	0	0	C2o=	C2	(d.74.3.2)*4
1xqb_1	372	339	52	24	18	22.464	1.238	0.529	0.417	0.540	0.481	0	0	1	0	0	0	C2o=	C2	(e.56.1.1)*2
1xqo_1	253	252	29	20	19	11.020	0.744	0.566	0.536	0.503	0.558	0	0	1	1	0	0	A1o	A	(a.96.1.6)*1
1xrs_1	1456	1314	84	32	32	86.016	1.312	0.520	0.409	0.566	0.476	0	0	1	0	0	0	C2m≠	C2	(c.1.19.4)*2+(d.230.4.1,c.23.6.1)*2
1xs0_1	256	248	32	19	18	10.944	0.865	0.634	0.524	0.702	0.582	0	0	1	1	0	0	C2o=	C2	(d.233.1.1)*2
1xsz_1	356	322	36	30	18	19.440	0.750	0.559	0.438	0.627	0.505	0	0	1	0	0	0	A1m	A	(a.118.3.1,d.129.9.1)*1
1xta_1	439	374	41	25	23	23.575	0.854	0.467	0.409	0.249	0.445	0	1	0	0	0	0	C2m=	C2	(d.111.1.1,g.19.1.0)*2
1xu1_1	524	472	32	29	29	26.912	0.552	0.596	0.485	0.535	0.555	0	0	1	0	0	0	C3	C3	(b.22.1.1)*3+(g.24.1.2)*3
1xv2_2	465	458	41	28	18	20.664	0.891	0.574	0.523	0.513	0.558	0	0	1	1	0	0	C2o=	C2	(d.290.1.1)*2
1xwl_1	580	526	43	30	28	36.120	0.741	0.410	0.370	0.474	0.398	0	1	0	0	0	0	A1m	A	(c.55.3.5,e.8.1.1)*1
1xwm_1	424	408	35	30	21	22.050	0.686	0.556	0.481	0.479	0.538	0	0	1	0	0	0	C2o=	C2	(a.7.12.1)*2
1xx6_1	344	312	32	29	18	16.704	0.681	0.597	0.477	0.653	0.545	0	0	1	0	0	0	C2m=	C2	(c.37.1.24,g.39.1.14)*2
1xx9_1	749	730	59	28	25	41.300	1.113	0.431	0.427	0.329	0.430	0	1	0	0	0	0	C2o≠	C2	(b.16.1.1)*2+(b.47.1.2)*2
1xyf_1	854	769	51	33	30	50.490	0.810	0.381	0.356	0.222	0.375	0	1	0	0	0	0	C2m=	C2	(c.1.8.3,b.42.2.1)*2
1xzp_1	587	511	47	37	22	38.258	0.797	0.474	0.355	0.591	0.425	0	1	0	0	0	0	A2	A	(d.250.1.2)*1+(d.250.1.2,a.24.25.1,c.37.1.8)*1
1y02_1	91	87	25	13	11	3.575	1.042	0.619	0.553	0.564	0.607	0	0	1	1	0	0	A1m	A	(g.50.1.1,a.140.2.1)*1
1y0n_1	71	70	22	14	11	3.388	0.880	0.616	0.486	0.641	0.556	0	0	1	0	0	0	A1o	A	(d.291.1.1)*1
1y0p_1	568	531	42	29	22	26.796	0.824	0.540	0.472	0.334	0.514	0	0	1	0	0	0	A1m	A	(a.138.1.3,c.3.1.4,d.168.1.1)*1
1y1l_1	496	472	42	36	17	25.704	0.792	0.525	0.456	0.290	0.494	0	0	1	0	0	0	D2	D2	(c.44.1.1)*4
1y2g_2	140	135	25	20	12	6.000	0.781	0.627	0.531	0.677	0.592	0	0	1	1	0	0	A1o	A	(d.129.4.1)*1
1y60_1	841	841	38	38	26	37.544	0.594	0.580	0.516	0.340	0.548	0	0	1	1	0	0	C4+	C5	(d.14.1.12)*5
1y64_1	768	648	53	43	22	50.138	0.815	0.454	0.352	0.597	0.415	0	1	0	0	0	0	A2	A	(a.207.1.1)*1+(c.55.1.0,c.55.1.1)*1
1y6m_1	692	548	76	25	22	41.800	1.617	0.503	0.377	0.495	0.452	0	0	1	0	0	0	C2m≠	C2	(a.26.1.3)*2+(b.1.2.1,b.1.2.1)*2
1y6x_1	174	156	33	20	17	11.220	0.892	0.494	0.363	0.608	0.437	0	1	0	0	0	0	C2o=	C2	(a.204.1.4)*2
1y7p_2	434	426	34	29	22	21.692	0.667	0.558	0.490	0.352	0.540	0	0	1	0	0	0	C2m=	C2	(d.58.18.12,c.23.1.7)*2
1y88_1	368	322	51	23	20	23.460	1.186	0.463	0.380	0.420	0.432	0	1	0	0	0	0	C2m=	C2	(c.52.1.30,a.60.4.3)*2
1y8x_1	252	241	42	18	15	11.340	1.273	0.616	0.512	0.532	0.567	0	0	1	1	0	0	A2	A	(c.111.1.2)*1+(d.20.1.1)*1
1yac_1	1632	1632	48	43	42	86.688	0.565	0.492	0.476	0.089	0.486	0	1	0	0	0	0	D4+	D4	(c.33.1.3)*8
1yb0_1	473	448	36	34	21	25.704	0.655	0.492	0.434	0.458	0.472	0	1	0	0	0	0	C3	C3	(d.118.1.1)*3
1yb3_1	166	161	26	21	14	7.644	0.743	0.573	0.527	0.638	0.563	0	0	1	1	0	0	A1o	A	(d.296.1.2)*1
1yba_1	1624	1592	72	50	32	115.200	0.878	0.340	0.341	0.159	0.350	0	1	0	0	1	0	D2	D2	(c.23.12.1,c.2.1.4,d.58.18.1)*4
1ybz_1	76	71	33	13	8	3.432	1.571	0.372	0.399	0.489	0.391	0	1	0	0	1	0	A1o	A	(a.130.1.1)*1
1ycy_1	992	992	40	39	38	59.280	0.519	0.127	0.315	0.000	0.229	1	0	0	0	1	0	D4+	D8	(b.38.1.4)*16
1ydl_1	71	65	26	13	10	3.380	1.130	0.534	0.431	0.590	0.484	0	0	1	0	0	0	A1o	A	(d.295.1.1)*1
1yf2_1	425	355	51	28	22	31.416	1.020	0.270	0.291	0.039	0.279	1	0	0	0	1	0	A1m	A	(d.287.1.2,d.287.1.2)*1
1yf9_1	477	473	38	37	21	29.526	0.655	0.430	0.419	0.199	0.436	0	1	0	0	0	0	C3	C3	(d.20.1.1)*3
1yfs_1	448	415	38	26	23	22.724	0.776	0.489	0.448	0.512	0.476	0	1	0	0	0	0	A1m	A	(d.104.1.1,a.203.1.1)*1
1yge_1	839	803	54	33	26	46.332	0.915	0.546	0.468	0.632	0.521	0	0	1	0	0	0	A1m	A	(b.12.1.1,a.119.1.1)*1
1ygy_1	2108	1962	85	51	35	151.725	0.988	0.410	0.325	0.442	0.377	0	1	0	0	0	0	C2m=	C2	(c.23.12.1,c.2.1.4,d.81.2.2,d.58.18.1)*4
1yhc_1	532	514	58	27	19	29.754	1.261	0.479	0.443	0.372	0.465	0	1	0	0	0	0	C2m=	C2	(d.14.1.7,d.14.1.7)*2
1yi5_1	1356	1245	54	53	33	94.446	0.628	0.416	0.360	0.142	0.393	0	1	0	0	0	0	C4+	C5	(b.96.1.1)*5+(g.7.1.1)*5
1yii_1	316	302	39	22	18	15.444	0.975	0.552	0.485	0.513	0.532	0	0	1	0	0	0	A1o	A	(a.65.1.1)*1
1yj5_1	762	707	65	32	21	43.680	1.226	0.466	0.397	0.333	0.437	0	1	0	0	0	0	A2	A	(c.108.1.9,c.37.1.1)*2
1ykh_1	209	173	54	18	11	10.692	1.862	0.542	0.441	0.556	0.501	0	0	1	0	0	0	A2	A	(a.252.1.1)*1+(a.252.1.2)*1
1yla_1	402	371	35	31	18	19.530	0.714	0.504	0.472	0.308	0.503	0	0	1	0	0	0	C2m=	C2	(d.20.1.1,a.5.2.1)*2
1ylf_1	354	321	41	39	19	30.381	0.707	0.337	0.273	0.122	0.305	1	0	0	0	0	0	C3	C3	(a.4.5.0)*2+(a.4.5.55)*1
1ylo_1	4152	4104	68	68	67	309.808	0.504	0.287	0.341	0.043	0.323	1	0	0	0	1	0	TOI	T	(c.56.5.4,b.49.3.1)*12
1ylx_1	200	193	26	22	17	9.724	0.667	0.598	0.493	0.636	0.555	0	0	1	0	0	0	C2o=	C2	(d.82.5.1)*2
1ym7_1	608	560	52	37	22	42.328	0.881	0.441	0.361	0.485	0.410	0	1	0	0	0	0	A1m	A	(a.91.1.1,d.144.1.7,b.55.1.1)*1
1ynt_1	1427	1223	72	65	23	107.640	0.818	0.400	0.297	0.405	0.358	1	0	0	0	0	0	A4+	A	(b.1.1.0,b.1.1.2)*2+(b.1.1.2)*2+(b.6.2.1,b.6.2.1)*2+(d.15.7.1)*1
1yoz_1	229	212	27	22	21	12.474	0.628	0.561	0.451	0.355	0.509	0	0	1	0	0	0	C2o=	C2	(a.253.1.1)*2
1yp4_1	1725	1596	57	49	42	117.306	0.626	0.460	0.372	0.227	0.420	0	1	0	0	0	0	D2	D2	(c.68.1.6,b.81.1.4)*4
1yq2_1	6120	6024	80	79	75	474.000	0.519	0.375	0.339	0.036	0.351	0	1	0	0	0	0	D3	D3	(b.18.1.5,b.1.4.1,c.1.8.3,b.1.4.1,b.30.5.1)*6
1yqe_1	282	277	30	22	19	12.540	0.732	0.608	0.540	0.570	0.588	0	0	1	1	0	0	A1o	A	(c.56.7.1)*1
1yro_1	395	384	39	25	22	21.450	0.830	0.541	0.472	0.371	0.515	0	0	1	0	0	0	A2	A	(c.68.1.2)*1+(d.2.1.2)*1
1yt3_1	375	357	40	33	18	23.760	0.784	0.407	0.387	0.221	0.402	0	1	0	0	0	0	A1m	A	(c.55.3.5,a.60.8.3,a.60.8.3)*1
1yt8_1	525	503	42	29	26	31.668	0.764	0.480	0.414	0.402	0.454	0	1	0	0	0	0	A1m	A	(c.46.1.2,c.46.1.2,c.46.1.2,c.46.1.2)*1
1yu0_1	1128	1110	49	36	35	61.740	0.690	0.499	0.436	0.344	0.475	0	1	0	0	0	0	C3	C3	(b.163.1.1,d.169.1.8)*3
1yu5_1	67	63	18	14	10	2.520	0.750	0.585	0.539	0.454	0.571	0	0	1	1	0	0	A1o	A	(a.14.1.1)*1
1yuw_1	554	499	54	27	24	34.992	1.059	0.471	0.367	0.485	0.428	0	1	0	0	0	0	A1m	A	(c.55.1.1,c.55.1.1,b.130.1.1)*1
1yuz_1	402	392	35	24	23	19.320	0.745	0.568	0.486	0.550	0.547	0	0	1	0	0	0	C2m=	C2	(a.25.1.1,g.41.5.1)*2
1yvr_1	520	502	47	31	19	27.683	0.940	0.501	0.461	0.498	0.492	0	0	1	0	0	0	A1m	A	(a.118.25.1,c.62.1.5)*1
1yvs_1	324	306	38	38	15	21.660	0.717	0.445	0.356	0.557	0.406	0	1	0	0	0	0	C3	C3	(d.1.1.2)*3
1yw9_1	369	329	31	27	21	17.577	0.646	0.595	0.479	0.662	0.547	0	0	1	0	0	0	A1m	A	(d.127.1.1,a.4.5.25)*1
1yy3_1	315	298	40	23	20	18.400	0.930	0.483	0.401	0.594	0.450	0	1	0	0	0	0	A1o	A	(e.53.1.0)*1
1yyf_1	7056	6708	142	63	63	563.598	1.127	0.371	0.319	0.052	0.342	0	1	0	0	0	0	D4+	D6	(c.37.1.20)*12+(d.153.1.4)*12
1yzm_1	46	45	22	10	6	1.320	1.375	0.652	0.614	0.427	0.640	0	0	1	1	0	0	A1o	A	(a.2.19.1)*1
1yzy_1	412	395	40	23	22	20.240	0.889	0.476	0.448	0.523	0.467	0	1	0	0	0	0	A1o	A	(c.146.1.1)*1
1z0g_1	1174	1118	53	47	28	69.748	0.707	0.364	0.387	0.064	0.381	0	1	0	0	1	0	C4+	C6	(d.14.1.0)*6
1z0j_1	220	202	27	21	18	10.206	0.692	0.586	0.496	0.685	0.555	0	0	1	0	0	0	A2	A	(a.2.19.1)*1+(c.37.1.8)*1
1z0p_1	146	130	33	16	14	7.392	1.100	0.599	0.485	0.379	0.558	0	0	1	0	0	0	C2o=	C2	(a.2.18.1)*2
1z1a_2	119	114	27	15	14	5.670	0.931	0.609	0.499	0.532	0.556	0	0	1	0	0	0	A1o	A	(d.339.1.1)*1
1z21_1	96	87	24	13	11	3.432	1.000	0.609	0.584	0.427	0.607	0	0	1	1	0	0	A1o	A	(a.243.1.2)*1
1z2u_1	150	144	29	17	13	6.409	0.967	0.619	0.540	0.484	0.586	0	0	1	1	0	0	A1o	A	(d.20.1.1)*1
1z3e_1	186	172	33	19	15	9.405	0.971	0.598	0.476	0.671	0.545	0	0	1	0	0	0	A2	A	(a.60.3.1)*1+(c.47.1.12)*1
1z3x_1	236	222	34	21	17	12.138	0.895	0.580	0.481	0.727	0.546	0	0	1	0	0	0	A1m	A	(a.118.1.22,a.261.1.1)*1
1z45_1	1348	1246	86	49	28	117.992	1.117	0.382	0.288	0.308	0.339	1	0	0	0	0	0	C2m=	C2	(c.2.1.2,b.30.5.4)*2
1z52_1	901	889	62	33	29	59.334	1.000	0.378	0.375	0.087	0.378	0	1	0	0	0	0	C2m=	C2	(d.169.1.0,f.8.1.1)*2
1z5b_1	926	827	42	37	34	52.836	0.592	0.545	0.434	0.507	0.500	0	0	1	0	0	0	C2m=	C2	(d.122.1.2,a.156.1.3,d.14.1.3)*2
1z5y_1	254	239	44	20	17	14.960	1.189	0.523	0.423	0.598	0.488	0	0	1	0	0	0	A2	A	(b.1.17.1)*1+(c.47.1.10)*1
1z67_1	127	107	19	16	14	4.256	0.633	0.574	0.518	0.463	0.549	0	0	1	1	0	0	A1o	A	(a.259.1.1)*1
1z6r_1	764	709	47	40	24	45.120	0.734	0.475	0.397	0.521	0.447	0	1	0	0	0	0	C2m=	C2	(a.4.5.63,c.55.1.10,c.55.1.10)*2
1z8u_2	226	204	30	20	19	11.400	0.769	0.550	0.452	0.432	0.515	0	0	1	0	0	0	A2	A	(a.1.1.2)*1+(a.7.11.1)*1
1z92_1	244	225	38	20	16	12.160	1.056	0.576	0.470	0.621	0.532	0	0	1	0	0	0	A2	A	(a.26.1.2)*1+(g.18.1.1,g.18.1.1)*1
1z94_1	570	556	37	36	25	33.300	0.607	0.484	0.428	0.204	0.456	0	1	0	0	0	0	D2	D2	(d.129.3.5)*4
1z96_1	38	38	12	9	9	0.972	0.667	0.617	0.607	0.688	0.627	0	0	1	1	0	0	A1o	A	(a.5.2.1)*1
1z9d_1	238	218	25	21	19	9.975	0.625	0.543	0.487	0.647	0.526	0	0	1	0	0	0	A1o	A	(c.73.1.3)*1
1za3_1	543	489	49	27	23	30.429	0.980	0.448	0.392	0.250	0.427	0	1	0	0	0	0	A3	A	(b.1.1.1,b.1.1.2)*2+(g.24.1.1,g.24.1.1,g.24.1.1)*1
1zao_1	271	253	39	20	16	12.480	1.083	0.588	0.492	0.621	0.548	0	0	1	0	0	0	A1m	A	(a.4.5.56,d.144.1.9)*1
1zat_1	248	224	51	16	15	12.240	1.645	0.595	0.471	0.588	0.546	0	0	1	0	0	0	A1m	A	(d.335.1.1,b.160.1.1)*1
1zav_1	353	332	59	24	18	25.488	1.405	0.394	0.329	0.455	0.368	0	1	0	0	0	0	A4+	A	(a.108.1.1)*6+(d.58.62.1)*1
1zbd_1	301	286	46	23	16	16.928	1.179	0.548	0.428	0.514	0.497	0	0	1	0	0	0	A2	A	(c.37.1.8)*1+(g.50.1.1)*1
1zbp_1	266	250	34	22	20	14.960	0.810	0.570	0.443	0.612	0.514	0	0	1	0	0	0	A1o	A	(e.61.1.1)*1
1zbx_1	317	272	40	27	18	19.440	0.889	0.502	0.392	0.568	0.457	0	0	1	0	0	0	A2	A	(b.34.12.1)*1+(d.339.1.1)*1
1zc3_1	282	259	32	22	19	13.376	0.780	0.560	0.483	0.620	0.531	0	0	1	0	0	0	A2	A	(b.55.1.1)*1+(c.37.1.8)*1
1zck_1	454	412	34	34	21	24.276	0.618	0.537	0.449	0.317	0.497	0	0	1	0	0	0	C3	C3	(c.45.1.1)*3
1zd0_1	141	126	21	17	16	5.712	0.636	0.632	0.505	0.447	0.570	0	0	1	1	0	0	A1o	A	(d.329.1.1)*1
1zdy_1	301	297	27	25	19	12.825	0.614	0.543	0.530	0.284	0.537	0	0	1	1	0	0	A1o	A	(d.313.1.1)*1
1ze3_1	443	405	45	34	17	26.010	0.882	0.528	0.397	0.617	0.473	0	0	1	0	0	0	A3	A	(b.1.11.1,b.7.2.1)*1+(b.167.1.1)*1+(b.2.3.2)*1
1zei_1	318	318	29	26	22	16.588	0.604	0.503	0.464	0.179	0.480	0	0	1	0	0	0	D3	D3	(g.1.1.1)*6
1zel_2	295	276	44	18	16	12.672	1.294	0.585	0.498	0.627	0.553	0	0	1	0	0	0	A1m	A	(a.4.5.83,d.377.1.1)*1
1zfj_1	1908	1528	64	63	26	104.832	0.719	0.482	0.384	0.330	0.445	0	1	0	0	0	0	C4+	C4	(c.1.5.1,d.37.1.1)*4
1zhq_1	226	219	27	20	19	10.260	0.692	0.568	0.496	0.347	0.534	0	0	1	0	0	0	C2m=	C2	(d.230.7.1,d.230.7.1)*2
1zhv_1	134	116	24	15	14	5.040	0.828	0.607	0.504	0.676	0.561	0	0	1	1	0	0	A1m	A	(d.58.18.8,d.58.18.8)*1
1zhx_1	436	407	37	28	23	23.828	0.725	0.560	0.459	0.375	0.519	0	0	1	0	0	0	A1o	A	(d.338.1.1)*1
1zin_1	217	209	26	22	18	10.296	0.650	0.458	0.462	0.358	0.469	0	1	0	0	1	0	A1m	A	(c.37.1.1,g.41.2.1)*1
1zjc_1	826	808	60	28	26	43.680	1.111	0.474	0.465	0.339	0.472	0	1	0	0	0	0	C2o=	C2	(e.60.1.1)*2
1zjk_1	390	347	61	21	19	24.339	1.525	0.462	0.356	0.433	0.413	0	1	0	0	0	0	A1m	A	(g.18.1.1,g.18.1.1,b.47.1.2)*1
1zk4_1	1004	972	47	41	25	48.175	0.712	0.580	0.498	0.338	0.548	0	0	1	0	0	0	D2	D2	(c.2.1.2)*4
1zke_2	165	165	39	15	12	7.020	1.444	0.593	0.536	0.503	0.569	0	0	1	1	0	0	C2o=	C2	(a.30.6.1)*2
1zl0_1	306	292	30	21	19	11.970	0.750	0.604	0.530	0.587	0.575	0	0	1	1	0	0	A1m	A	(c.23.16.7,c.8.10.1)*1
1zlh_1	375	372	33	25	21	17.325	0.717	0.593	0.528	0.573	0.578	0	0	1	1	0	0	A2	A	(c.56.5.1)*1+(g.9.1.3,g.9.1.3)*1
1zoy_1	1092	1003	64	33	29	61.248	1.032	0.533	0.434	0.527	0.498	0	0	1	0	0	0	A4+	A	(c.3.1.4,d.168.1.1,a.7.3.1)*1+(d.15.4.2,a.1.2.1)*1+(f.21.2.2)*2
1zps_1	252	247	26	24	19	11.856	0.605	0.576	0.501	0.569	0.548	0	0	1	1	0	0	C2o=	C2	(b.168.1.1)*2
1zpw_1	82	81	20	17	10	3.400	0.741	0.556	0.488	0.597	0.530	0	0	1	0	0	0	A1o	A	(d.58.58.1)*1
1zq1_1	1890	1485	80	39	36	112.320	1.067	0.509	0.371	0.571	0.448	0	0	1	0	0	0	C2m≠	C2	(b.38.3.1,c.88.1.1)*2+(d.128.1.5,d.74.4.1,a.182.1.2)*2
1zq7_1	813	766	69	33	22	50.094	1.255	0.508	0.401	0.547	0.470	0	0	1	0	0	0	D2	D2	(d.309.1.1)*4
1zro_1	1176	1066	72	47	32	108.288	0.911	0.331	0.283	0.361	0.317	1	0	0	0	0	0	C2m=	C2	(a.264.1.1,a.264.1.1)*2
1zrs_1	588	565	48	29	21	29.232	0.960	0.574	0.487	0.450	0.537	0	0	1	0	0	0	C2m=	C2	(c.23.16.7,c.8.10.1)*2
1zru_1	758	667	60	30	29	52.200	1.017	0.453	0.342	0.433	0.413	0	1	0	0	0	0	C3	C3	(b.163.1.2,b.108.1.4,b.21.1.3)*3
1zso_1	315	300	44	22	16	15.488	1.158	0.564	0.490	0.322	0.535	0	0	1	0	0	0	C2o=	C2	(b.166.1.1)*2
1zsq_1	513	488	45	25	24	27.000	0.918	0.574	0.492	0.618	0.547	0	0	1	0	0	0	A1m	A	(b.55.1.8,c.45.1.3)*1
1zsw_1	328	307	28	25	21	14.700	0.609	0.592	0.521	0.669	0.570	0	0	1	1	0	0	A1m	A	(d.32.1.10,d.32.1.10)*1
1zt2_1	534	467	64	29	18	33.408	1.362	0.497	0.391	0.498	0.458	0	1	0	0	0	0	A2	A	(a.262.1.1)*1+(d.264.1.1)*1
1zt3_1	80	73	22	17	9	3.366	0.846	0.641	0.494	0.693	0.573	0	0	1	0	0	0	A1o	A	(g.28.1.1)*1
1ztb_1	388	347	37	27	17	16.983	0.841	0.578	0.461	0.647	0.529	0	0	1	0	0	0	A1o	A	(d.258.1.0)*1
1zun_1	598	568	40	33	26	34.320	0.678	0.550	0.435	0.406	0.499	0	0	1	0	0	0	A2	A	(c.26.2.2)*1+(c.37.1.8,b.43.3.1,b.44.1.1)*1
1zwy_1	690	670	38	37	28	39.368	0.585	0.512	0.441	0.194	0.481	0	0	1	0	0	0	D2	D2	(c.51.4.0)*3+(c.51.4.3)*1
1zxx_1	1276	1208	44	43	36	68.112	0.557	0.523	0.442	0.234	0.493	0	0	1	0	0	0	D2	D2	(c.89.1.0)*4
1zy9_1	526	519	38	30	22	25.080	0.731	0.617	0.530	0.608	0.583	0	0	1	1	0	0	A1m	A	(b.30.5.11,c.1.8.13)*1
1zym_1	495	459	67	23	18	27.738	1.634	0.478	0.402	0.588	0.455	0	1	0	0	0	0	C2m=	C2	(c.8.1.2,a.60.10.1)*2
1zzk_1	80	74	22	14	11	3.388	0.880	0.615	0.515	0.464	0.575	0	0	1	1	0	0	A1o	A	(d.51.1.0)*1
256b_1	106	105	26	14	12	4.368	1.000	0.554	0.522	0.503	0.550	0	0	1	1	0	0	A1o	A	(a.24.3.1)*1
2a19_1	632	541	65	30	22	42.900	1.250	0.465	0.349	0.500	0.411	0	1	0	0	0	0	A3	A	(b.40.4.0,a.60.14.0)*1+(d.144.1.0)*2
2a1a_1	862	754	94	26	25	61.100	1.843	0.425	0.341	0.424	0.393	0	1	0	0	0	0	C2m≠	C2	(b.40.4.0,a.60.14.0)*2+(d.144.1.0)*2
2a1t_1	2100	1947	75	46	38	131.100	0.893	0.453	0.383	0.500	0.422	0	1	0	0	0	0	A4+	A	(c.26.2.3)*1+(c.26.2.3,c.31.1.0)*1+(e.6.1.1,a.29.3.0)*4
2a1v_1	138	133	23	18	15	6.210	0.697	0.602	0.501	0.523	0.560	0	0	1	1	0	0	A1o	A	(d.198.3.1)*1
2a26_1	94	85	27	12	11	3.564	1.174	0.581	0.531	0.326	0.559	0	0	1	1	0	0	C2o=	C2	(a.2.16.1)*2
2a2l_1	1152	1150	45	44	29	57.420	0.616	0.466	0.471	0.095	0.461	0	1	0	0	1	0	D4+	D4	(d.110.9.1)*8
2a5y_1	1047	973	54	47	26	65.988	0.740	0.482	0.398	0.608	0.451	0	1	0	0	0	0	A3	A	(a.77.1.3,c.37.1.20,a.4.5.80)*1+(c.37.1.20,a.4.5.80)*1+(f.1.4.1)*1
2a65_1	509	483	38	26	23	22.724	0.776	0.599	0.532	0.414	0.573	0	0	1	1	0	0	A1o	A	(f.54.1.1)*1
2a6q_1	228	214	36	19	16	10.944	1.029	0.543	0.480	0.680	0.523	0	0	1	0	0	0	A3	A	(d.298.1.1)*1+(d.306.1.1)*2
2a6t_1	230	205	37	20	16	11.840	1.028	0.522	0.441	0.620	0.491	0	0	1	0	0	0	A1m	A	(a.242.1.1,d.113.1.7)*1
2a72_1	266	251	51	20	18	18.360	1.342	0.485	0.372	0.391	0.434	0	1	0	0	0	0	C2o=	C2	(a.91.1.0)*2
2a8k_1	94	87	20	15	12	3.600	0.741	0.572	0.511	0.726	0.558	0	0	1	1	0	0	A1o	A	(d.243.1.2)*1
2a90_1	160	153	27	19	15	7.695	0.794	0.546	0.485	0.625	0.528	0	0	1	0	0	0	A1m	A	(d.289.1.1,d.289.1.1)*1
2a9d_1	728	675	45	33	24	35.640	0.789	0.511	0.469	0.527	0.504	0	0	1	0	0	0	C2m=	C2	(d.176.1.1,b.1.18.6)*2
2a9s_1	332	322	28	25	20	14.000	0.622	0.596	0.536	0.529	0.582	0	0	1	1	0	0	C2o=	C2	(c.51.5.1)*2
2a9u_1	261	209	33	24	19	15.048	0.767	0.452	0.371	0.111	0.401	0	1	0	0	0	0	C2o=	C2	(a.118.23.1)*2
2aaf_1	1626	1620	53	46	44	107.272	0.589	0.352	0.381	0.039	0.371	0	1	0	0	1	0	D2	D2	(d.126.1.4)*4
2ab5_1	518	441	40	29	25	29.000	0.741	0.536	0.421	0.536	0.487	0	0	1	0	0	0	C2m=	C2	(d.95.2.0,d.95.2.0)*2
2adf_1	616	585	56	27	22	33.264	1.143	0.453	0.417	0.570	0.443	0	1	0	0	0	0	A3	A	(b.1.1.0)*1+(b.1.1.1,b.1.1.2)*1+(c.62.1.1)*1
2adm_1	385	359	44	25	20	22.000	0.978	0.493	0.425	0.500	0.466	0	1	0	0	0	0	A1m	A	(c.66.1.27,d.287.1.1)*1
2ae0_1	335	321	39	24	18	16.848	0.929	0.532	0.467	0.601	0.503	0	0	1	0	0	0	A1o	A	(b.52.1.4)*1
2aen_1	1312	1125	93	47	31	135.501	1.192	0.325	0.234	0.481	0.291	1	0	0	0	0	0	A4+	A	(b.29.1.0)*8
2afh_1	2572	2375	85	48	38	155.040	0.988	0.524	0.419	0.539	0.482	0	0	1	0	0	0	A4+	A	(c.37.1.10)*2+(c.92.2.3)*4
2ahm_1	1968	1940	65	55	51	182.325	0.613	0.275	0.279	0.007	0.274	1	0	0	0	1	0	D2	D2	(a.8.9.1)*8+(d.302.1.1)*8
2aho_1	660	600	68	33	22	49.368	1.236	0.383	0.315	0.492	0.357	0	1	0	0	0	0	A2	A	(b.40.4.5,a.60.14.1,d.58.51.1)*1+(c.37.1.8,b.43.3.1,b.44.1.1)*1
2ahr_1	2574	2536	59	59	57	198.417	0.509	0.437	0.324	0.184	0.375	0	1	0	0	0	0	D4+	D5	(c.2.1.6,a.100.1.10)*10
2ahu_1	2060	1782	70	44	42	129.360	0.814	0.505	0.371	0.265	0.441	0	0	1	0	0	0	D2	D2	(c.124.1.2,c.124.1.3)*4
2aib_1	196	191	31	18	18	10.044	0.861	0.447	0.429	0.379	0.448	0	1	0	0	0	0	C2o=	C2	(a.134.1.1)*2
2aio_1	1064	1008	43	40	37	63.640	0.558	0.492	0.404	0.269	0.456	0	1	0	0	0	0	D2	D2	(d.157.1.1)*4
2aj7_1	306	281	38	24	16	14.592	0.950	0.566	0.479	0.619	0.536	0	0	1	0	0	0	C2o=	C2	(b.158.1.1)*2
2aja_2	345	301	54	22	15	17.820	1.459	0.564	0.448	0.642	0.517	0	0	1	0	0	0	A1o	A	(a.118.24.1)*1
2ala_1	384	347	81	19	13	20.007	2.531	0.554	0.431	0.597	0.500	0	0	1	0	0	1	A1m	A	(f.10.1.1,b.1.18.0)*1
2aly_1	2102	1836	96	53	33	167.904	1.116	0.437	0.306	0.509	0.381	0	1	0	0	0	0	C2m≠	C2	(a.6.1.1,b.40.4.4,b.153.1.1,a.6.1.1,d.104.1.1,d.58.13.1)*2+(d.104.1.1)*2
2ap3_1	192	179	49	15	12	8.820	1.815	0.515	0.472	0.576	0.501	0	0	1	0	0	0	A1o	A	(a.24.27.1)*1
2apl_1	149	139	34	17	12	6.936	1.172	0.592	0.480	0.658	0.546	0	0	1	0	0	0	A1o	A	(a.258.1.1)*1
2apo_1	359	326	39	31	15	18.135	0.848	0.556	0.445	0.605	0.511	0	0	1	0	0	0	A2	A	(d.265.1.2,b.122.1.1)*1+(g.41.16.1)*1
2aq2_1	344	323	39	28	17	18.564	0.867	0.578	0.464	0.630	0.533	0	0	1	0	0	0	A2	A	(b.1.1.1)*1+(b.40.2.2,d.15.6.1)*1
2arh_1	584	583	39	39	29	44.109	0.574	0.452	0.367	0.544	0.423	0	1	0	0	0	0	C3	C3	(d.108.1.9)*3
2ass_1	537	481	53	29	23	35.351	1.019	0.441	0.357	0.600	0.411	0	1	0	0	0	0	A3	A	(a.158.1.1,c.10.1.3)*1+(d.42.1.1,a.157.1.1)*1+(d.97.1.1)*1
2au5_1	129	112	23	19	13	5.681	0.719	0.601	0.479	0.660	0.549	0	0	1	0	0	0	A1o	A	(a.244.1.1)*1
2aua_1	409	382	43	32	19	26.144	0.843	0.504	0.394	0.638	0.460	0	0	1	0	0	0	C2o=	C2	(d.166.1.6)*2
2aus_1	728	640	68	31	24	50.592	1.236	0.439	0.339	0.316	0.394	0	1	0	0	0	0	C2m≠	C2	(d.265.1.0,b.122.1.0)*2+(g.41.16.1)*2
2auw_1	306	260	49	23	16	18.032	1.256	0.483	0.379	0.571	0.442	0	1	0	0	0	0	A2	A	(d.331.1.1,a.35.1.10)*2
2av5_1	106	106	20	19	11	4.180	0.667	0.577	0.559	0.561	0.572	0	0	1	1	0	0	A1o	A	(d.58.59.1)*1
2avu_1	672	634	53	39	18	37.206	0.930	0.445	0.433	0.290	0.448	0	1	0	0	0	0	C2o≠	C2	(a.145.1.1)*4+(e.64.1.1)*2
2awo_1	746	701	40	37	36	53.280	0.548	0.473	0.354	0.340	0.419	0	1	0	0	0	0	C2m=	C2	(c.37.1.12,b.40.6.3)*2
2axv_1	1209	1020	76	40	21	63.840	1.246	0.517	0.421	0.314	0.474	0	0	1	0	0	0	D2	D2	(a.35.1.0,a.118.8.4)*4
2ayd_1	76	74	21	14	11	3.234	0.840	0.586	0.503	0.592	0.554	0	0	1	1	0	0	A1o	A	(g.79.1.0)*1
2b0a_1	372	366	38	24	21	19.152	0.844	0.606	0.506	0.570	0.565	0	0	1	1	0	0	C2o=	C2	(c.8.8.1)*2
2b0o_1	530	509	33	31	27	27.621	0.569	0.481	0.448	0.314	0.478	0	1	0	0	0	0	C2m=	C2	(g.45.1.0,d.211.1.0)*2
2b0t_1	735	682	45	31	31	43.245	0.726	0.436	0.390	0.258	0.423	0	1	0	0	0	0	A1o	A	(c.77.1.2)*1
2b1y_1	202	176	39	18	16	11.232	1.147	0.495	0.413	0.210	0.459	0	1	0	0	0	0	C2o=	C2	(b.156.1.1)*2
2b2y_1	430	415	47	31	20	29.140	0.922	0.447	0.377	0.371	0.419	0	1	0	0	0	0	A3	A	(b.34.13.2)*1+(b.34.13.2,b.34.13.2)*2
2b3t_1	576	493	49	29	21	29.841	0.980	0.505	0.426	0.598	0.477	0	0	1	0	0	0	A2	A	(c.66.1.30)*1+(e.38.1.1)*1
2b4j_1	444	410	53	24	20	25.440	1.205	0.543	0.432	0.447	0.497	0	0	1	0	0	0	C2o≠	C2	(a.48.4.1)*2+(c.55.3.2)*2
2b4s_1	1161	1097	85	38	25	80.750	1.349	0.410	0.361	0.451	0.396	0	1	0	0	0	0	C2o≠	C2	(c.45.1.2)*2+(d.144.1.7)*2
2b5d_1	2072	2056	65	48	42	131.040	0.722	0.344	0.415	0.072	0.384	0	1	0	0	1	0	D2	D2	(c.6.2.4,a.8.3.3)*4
2b5e_1	483	440	57	34	22	42.636	1.018	0.330	0.276	0.174	0.303	1	0	0	0	0	0	A1m	A	(c.47.1.2,c.47.1.2,c.47.1.2,c.47.1.2)*1
2b5l_2	1309	1257	70	42	33	97.020	0.933	0.412	0.342	0.518	0.389	0	1	0	0	0	0	A2	A	(b.69.4.3,b.69.4.3,b.69.4.3,a.297.1.1)*1+(d.384.1.1)*1
2b5m_1	1119	1062	59	42	34	84.252	0.776	0.403	0.328	0.370	0.375	0	1	0	0	0	0	A1m	A	(b.69.4.3,b.69.4.3,b.69.4.3,a.297.1.1)*1
2b5u_1	554	453	53	39	20	41.340	0.898	0.444	0.300	0.541	0.376	0	1	0	0	0	0	A2	A	(b.110.1.1,h.4.9.1,b.101.1.1)*1+(d.26.2.1)*1
2b78_1	376	360	39	27	18	18.954	0.867	0.533	0.483	0.404	0.513	0	0	1	0	0	0	A1m	A	(b.122.1.9,c.66.1.51)*1
2b7n_1	1638	1636	54	54	33	96.228	0.621	0.501	0.440	0.227	0.470	0	0	1	0	0	0	D3	D3	(d.41.2.0,c.1.17.0)*6
2b8e_3	254	246	36	18	17	11.016	1.029	0.499	0.481	0.391	0.495	0	1	0	0	0	0	A1m	A	(c.108.1.7,d.220.1.1)*1
2b97_1	70	69	14	13	11	2.002	0.583	0.689	0.584	0.703	0.638	0	0	1	1	0	0	A1o	A	(b.138.1.1)*1
2b9d_1	104	102	20	18	13	4.680	0.645	0.500	0.485	0.216	0.498	0	0	1	0	0	0	C2o=	C2	(g.91.1.1)*2
2bas_1	799	743	48	44	24	50.688	0.706	0.478	0.403	0.582	0.452	0	1	0	0	0	0	C2m=	C2	(c.1.33.1,d.110.6.2)*2
2bbh_1	223	193	30	21	17	10.710	0.789	0.564	0.462	0.568	0.523	0	0	1	0	0	0	A1o	A	(d.328.1.1)*1
2bbk_1	960	912	54	32	29	50.112	0.885	0.513	0.469	0.393	0.503	0	0	1	0	0	0	C2o≠	C2	(b.69.2.1)*2+(g.21.1.1)*2
2bcj_1	1344	1173	79	65	26	133.510	0.868	0.294	0.239	0.247	0.267	1	0	0	0	0	0	A4+	A	(a.137.3.1)*1+(a.91.1.1,d.144.1.7,b.55.1.1)*1+(b.69.4.1)*1+(c.37.1.8,a.66.1.1)*1
2bcn_1	696	656	61	29	27	47.763	1.089	0.374	0.359	0.364	0.377	0	1	0	0	0	0	A3	A	(a.3.1.1)*1+(a.93.1.1)*2
2be5_1	3409	3182	95	55	50	261.250	0.905	0.401	0.330	0.216	0.373	0	1	0	0	0	0	A4+	A	(a.143.1.1)*1+(a.177.1.1,a.4.13.1,a.4.13.2)*1+(d.74.3.1,d.181.1.1)*2+(e.29.1.1)*1+(e.29.1.2)*1
2ber_1	601	584	47	36	22	37.224	0.810	0.410	0.375	0.601	0.407	0	1	0	0	0	0	A1m	A	(b.68.1.1,b.1.18.0,b.18.1.0)*1
2bf5_1	92	85	17	15	12	3.060	0.630	0.613	0.581	0.621	0.606	0	0	1	1	0	0	A1o	A	(d.137.1.1)*1
2bh1_1	306	279	32	24	20	15.360	0.727	0.552	0.464	0.607	0.523	0	0	1	0	0	0	A2	A	(c.55.1.11,c.55.1.0)*1+(d.52.10.1)*1
2bhu_1	580	560	46	25	24	27.600	0.939	0.590	0.516	0.574	0.566	0	0	1	1	0	0	A1m	A	(b.1.18.2,c.1.8.1,b.71.1.1)*1
2bhw_1	669	663	44	43	36	68.112	0.557	0.242	0.245	0.009	0.243	1	0	0	0	1	0	C3	C3	(f.43.1.1)*3
2bi0_1	990	912	43	42	26	46.956	0.632	0.550	0.486	0.493	0.531	0	0	1	0	0	0	C3	C3	(d.38.1.4,d.38.1.4)*3
2bib_1	541	481	83	25	18	37.350	1.930	0.454	0.349	0.387	0.407	0	1	0	0	0	0	A1m	A	(d.157.1.8,b.109.1.1)*1
2bj7_1	550	536	51	25	23	29.325	1.062	0.549	0.475	0.620	0.527	0	0	1	0	0	0	C2m=	C2	(a.43.1.3,d.58.18.4)*4
2bjf_1	1312	1220	58	50	24	69.600	0.784	0.559	0.474	0.377	0.531	0	0	1	0	0	0	D2	D2	(d.153.1.0)*4
2bji_1	550	541	42	26	25	27.300	0.824	0.537	0.485	0.528	0.521	0	0	1	0	0	0	C2o=	C2	(e.7.1.1)*2
2bjm_1	920	920	46	45	26	53.820	0.648	0.419	0.421	0.057	0.415	0	1	0	0	1	0	D4+	D4	(b.1.1.1)*8
2bjq_1	340	328	38	24	20	18.240	0.864	0.525	0.456	0.576	0.503	0	0	1	0	0	0	A1m	A	(b.169.1.1,b.169.1.1)*1
2bkp_1	388	348	30	29	23	20.010	0.577	0.537	0.443	0.344	0.498	0	0	1	0	0	0	C2m=	C2	(a.7.12.1,d.286.1.1)*2
2bku_1	1026	929	51	43	32	70.176	0.680	0.350	0.337	0.604	0.359	0	1	0	0	0	0	A2	A	(a.118.1.1)*1+(c.37.1.8)*1
2bky_1	350	329	33	31	18	18.414	0.673	0.560	0.459	0.418	0.512	0	0	1	0	0	0	C2o=	C2	(d.68.6.1)*4
2bl8_1	93	89	20	17	11	3.740	0.714	0.566	0.511	0.382	0.545	0	0	1	1	0	0	A1o	A	(a.29.8.2)*1
2bln_1	298	284	44	20	16	14.080	1.222	0.557	0.482	0.414	0.527	0	0	1	0	0	0	A1m	A	(c.65.1.1,b.46.1.1)*1
2bm5_1	364	349	68	16	15	16.320	2.194	0.545	0.498	0.653	0.536	0	0	1	0	0	1	C2o=	C2	(b.80.8.1)*2
2bm7_1	1080	1000	67	33	30	66.330	1.063	0.481	0.380	0.463	0.434	0	1	0	0	0	0	D3	D3	(b.80.8.1)*6
2bmu_1	1353	1293	46	46	36	76.176	0.561	0.503	0.432	0.066	0.466	0	0	1	0	0	0	D3	D3	(c.73.1.3)*6
2bnk_1	128	124	33	14	14	6.468	1.179	0.600	0.494	0.490	0.561	0	0	1	0	0	0	C2o=	C2	(a.251.1.1)*2
2bnm_1	776	738	50	37	29	53.650	0.758	0.357	0.344	0.011	0.342	0	1	0	0	0	0	D2	D2	(a.35.1.3,b.82.1.10)*4
2bo3_1	184	150	24	23	15	8.280	0.632	0.584	0.474	0.494	0.539	0	0	1	0	0	0	C2o=	C2	(a.292.1.1)*2
2bo9_1	1048	959	70	36	25	63.000	1.148	0.498	0.412	0.570	0.466	0	1	0	0	0	0	A4+	A	(c.56.5.1)*2+(d.17.1.5,d.17.1.5)*2
2boe_1	281	279	30	22	20	13.200	0.714	0.573	0.501	0.601	0.554	0	0	1	1	0	0	A1o	A	(c.6.1.1)*1
2bs2_1	2302	2070	72	60	34	146.880	0.766	0.459	0.380	0.148	0.422	0	1	0	0	0	0	C2m≠	C2	(c.3.1.4,d.168.1.1,a.7.3.1)*2+(d.15.4.2,a.1.2.1)*2+(f.21.2.1)*2
2bsy_1	249	240	27	25	17	11.475	0.643	0.557	0.501	0.608	0.541	0	0	1	1	0	0	A1m	A	(b.85.4.1,b.85.4.1)*1
2btc_1	252	244	25	22	17	9.350	0.641	0.622	0.556	0.676	0.596	0	0	1	1	0	0	A2	A	(b.47.1.2)*1+(g.3.2.1)*1
2btd_1	209	205	28	19	15	7.980	0.824	0.602	0.568	0.560	0.597	0	0	1	1	0	0	A1o	A	(a.208.1.0)*1
2bti_1	117	99	19	18	12	4.104	0.633	0.594	0.537	0.425	0.568	0	0	1	1	0	0	C2o=	C2	(b.151.1.1)*2
2bto_1	2817	2721	61	60	54	197.640	0.535	0.363	0.352	0.227	0.369	0	1	0	0	0	0	A4+	A	(c.32.1.1,d.79.2.1)*6+(c.47.1.1)*3
2bw3_1	1204	1146	67	45	32	96.480	0.870	0.317	0.317	0.090	0.320	0	1	0	0	1	0	C2m≠	C2	(a.270.1.1)*2+(a.270.1.1,c.55.3.12)*2
2bwv_1	1760	1636	70	45	42	132.300	0.805	0.367	0.341	0.103	0.364	0	1	0	0	0	0	D2	D2	(c.55.2.1,d.127.1.1)*4
2bxx_1	134	117	21	17	15	5.355	0.656	0.628	0.506	0.744	0.574	0	0	1	1	0	0	A1o	A	(b.148.1.1)*1
2bz1_1	348	340	34	25	20	17.000	0.756	0.553	0.480	0.447	0.531	0	0	1	0	0	0	C2o=	C2	(c.144.1.1)*2
2c0g_1	228	210	41	19	15	11.685	1.206	0.539	0.444	0.581	0.500	0	0	1	0	0	0	A1m	A	(c.47.1.7,a.71.1.0)*1
2c0l_1	414	391	43	28	20	24.080	0.896	0.462	0.411	0.386	0.445	0	1	0	0	0	0	A2	A	(a.118.8.1)*1+(d.106.1.1)*1
2c1i_1	383	349	60	24	16	23.040	1.500	0.479	0.391	0.416	0.440	0	1	0	0	0	0	A1m	A	(d.341.1.1,c.6.2.3)*1
2c1v_1	670	608	49	28	25	34.300	0.925	0.521	0.445	0.489	0.499	0	0	1	0	0	0	C2m=	C2	(a.3.1.0,a.3.1.0)*2
2c1w_2	276	262	27	23	19	11.799	0.643	0.603	0.542	0.505	0.584	0	0	1	1	0	0	A1o	A	(d.294.1.1)*1
2c2a_1	482	424	51	31	21	33.201	0.981	0.463	0.347	0.534	0.417	0	1	0	0	0	0	C2m=	C2	(a.30.2.1,d.122.1.3)*2
2c2v_1	735	596	93	27	22	55.242	1.898	0.463	0.308	0.580	0.398	0	1	0	0	0	0	C2o≠	C2	(d.20.1.1)*4+(g.44.1.0)*1+(g.44.1.2)*1
2c3b_1	277	256	37	21	17	13.209	0.974	0.598	0.499	0.645	0.560	0	0	1	0	0	0	C2o=	C2	(b.62.1.1)*2
2c42_1	2462	2309	68	46	40	125.120	0.791	0.567	0.473	0.470	0.531	0	0	1	0	0	0	C2m=	C2	(c.36.1.8,c.48.1.3,c.64.1.1,d.58.1.5,c.36.1.12)*2
2c4b_1	142	132	29	20	11	6.380	0.935	0.578	0.444	0.658	0.515	0	0	1	0	0	0	A1m	A	(d.1.1.2,g.3.2.1)*1
2c4k_1	305	291	33	22	18	13.068	0.825	0.565	0.509	0.705	0.549	0	0	1	1	0	0	A1m	A	(c.61.1.2,c.61.1.2)*1
2c71_1	205	202	25	21	17	8.925	0.658	0.613	0.540	0.620	0.592	0	0	1	1	0	0	A1o	A	(c.6.2.3)*1
2ca5_1	62	56	36	12	5	2.160	2.118	0.627	0.506	0.847	0.585	0	0	1	1	0	1	A1o	A	(a.2.20.1)*1
2car_1	390	368	44	30	15	19.800	0.978	0.538	0.462	0.560	0.513	0	0	1	0	0	0	C2o≠	C2	(c.51.4.0)*1+(c.51.4.1)*1
2cay_1	526	446	37	32	28	33.152	0.617	0.496	0.391	0.173	0.450	0	1	0	0	0	0	D2	D2	(b.55.1.12)*4
2caz_1	225	192	29	26	15	11.310	0.707	0.550	0.449	0.520	0.511	0	0	1	0	0	0	A3	A	(a.2.17.1)*1+(a.2.17.2)*1+(a.2.17.3)*1
2cb8_1	86	84	22	16	10	3.520	0.846	0.606	0.535	0.792	0.581	0	0	1	1	0	0	A1o	A	(a.11.1.1)*1
2cc0_1	384	374	34	27	19	17.442	0.739	0.563	0.493	0.281	0.531	0	0	1	0	0	0	C2o=	C2	(c.6.2.3)*2
2ccq_1	99	98	20	15	12	3.600	0.741	0.619	0.576	0.478	0.604	0	0	1	1	0	0	A1o	A	(d.314.1.1)*1
2ce2_1	166	162	23	19	18	7.866	0.622	0.621	0.518	0.631	0.581	0	0	1	1	0	0	A1o	A	(c.37.1.8)*1
2cg6_1	180	166	38	21	14	11.172	1.086	0.520	0.379	0.557	0.461	0	0	1	0	0	0	C2m=	C2	(g.27.1.1,g.27.1.1)*2
2cg7_1	90	83	36	11	9	3.564	1.800	0.647	0.526	0.603	0.600	0	0	1	1	0	0	A1m	A	(g.27.1.1,g.27.1.1)*1
2ch4_1	459	413	50	33	18	29.700	0.980	0.474	0.369	0.525	0.432	0	1	0	0	0	0	A2	A	(b.40.7.1)*1+(d.122.1.3,b.40.7.1)*1
2ci1_1	275	273	25	25	21	13.125	0.543	0.570	0.513	0.486	0.551	0	0	1	1	0	0	A1o	A	(d.126.1.0)*1
2ci2_1	390	372	40	39	13	20.280	0.769	0.474	0.455	0.068	0.457	0	1	0	0	0	0	C4+	C6	(d.40.1.1)*6
2ci8_1	198	188	48	16	16	12.288	1.500	0.492	0.404	0.341	0.456	0	1	0	0	0	0	C2o=	C2	(d.93.1.0)*2
2cjt_1	248	235	30	25	16	12.000	0.732	0.536	0.465	0.439	0.506	0	0	1	0	0	0	C2o=	C2	(b.7.1.1)*2
2clt_1	367	348	45	22	20	19.800	1.071	0.502	0.428	0.475	0.473	0	0	1	0	0	0	A1m	A	(d.92.1.11,b.66.1.1)*1
2cly_2	292	237	76	18	14	19.152	2.375	0.501	0.349	0.621	0.436	0	0	1	0	0	1	A3	A	(f.45.1.1)*1+(f.52.1.1)*1+(f.53.1.1)*1
2cme_1	157	140	32	15	14	6.720	1.103	0.527	0.488	0.235	0.523	0	0	1	0	0	0	C2o=	C2	(b.164.1.1)*2
2cn4_1	346	340	49	19	18	16.758	1.324	0.483	0.446	0.434	0.471	0	1	0	0	0	0	C2o=	C2	(d.35.1.1)*2
2cnq_1	301	295	31	25	20	15.500	0.689	0.556	0.488	0.519	0.535	0	0	1	0	0	0	A1o	A	(d.143.1.1)*1
2co6_1	333	311	39	25	17	16.575	0.929	0.539	0.457	0.630	0.512	0	0	1	0	0	0	A2	A	(b.1.11.1,b.7.2.1)*1+(b.2.3.2)*1
2cqz_1	1038	966	45	44	30	59.400	0.608	0.529	0.451	0.231	0.496	0	0	1	0	0	0	D3	D3	(a.211.1.1)*6
2cs7_1	55	53	16	14	10	2.240	0.667	0.628	0.525	0.422	0.582	0	0	1	1	0	0	A1o	A	(d.9.2.1)*1
2csb_1	517	464	41	30	22	27.060	0.788	0.559	0.458	0.570	0.518	0	0	1	0	0	0	A1m	A	(a.267.1.1,a.60.2.4,a.60.2.4,a.60.2.4,a.60.2.4)*1
2csu_1	869	808	51	36	25	45.900	0.836	0.555	0.446	0.472	0.506	0	0	1	0	0	0	C2m=	C2	(c.2.1.8,c.23.4.1,c.23.4.1)*2
2cu2_1	670	624	70	24	22	36.960	1.522	0.542	0.430	0.557	0.497	0	0	1	0	0	0	C2m=	C2	(c.68.1.20,b.81.4.1)*2
2cu5_1	382	381	30	26	24	18.720	0.600	0.568	0.511	0.270	0.550	0	0	1	1	0	0	C3	C3	(d.273.1.0)*3
2cun_1	810	742	57	37	27	56.943	0.891	0.393	0.349	0.309	0.379	0	1	0	0	0	0	C2o=	C2	(c.86.1.0)*2
2cve_1	190	182	48	15	13	9.360	1.714	0.506	0.433	0.650	0.477	0	0	1	0	0	0	A1m	A	(d.14.1.11,d.58.11.2)*1
2cvz_1	1153	1008	53	49	24	62.328	0.726	0.533	0.410	0.536	0.482	0	0	1	0	0	0	D2	D2	(c.2.1.6,a.100.1.1)*4
2cw4_1	124	119	22	18	13	5.148	0.710	0.635	0.539	0.607	0.594	0	0	1	1	0	0	A1o	A	(d.79.1.1)*1
2cwy_1	94	94	20	14	13	3.640	0.741	0.599	0.567	0.702	0.597	0	0	1	1	0	0	A1o	A	(a.246.2.1)*1
2cx0_1	184	175	28	21	13	7.644	0.824	0.608	0.533	0.579	0.581	0	0	1	1	0	0	A1m	A	(d.17.6.4,b.122.1.1)*1
2cx8_1	398	358	35	26	20	18.200	0.761	0.530	0.458	0.507	0.505	0	0	1	0	0	0	C2m≠	C2	(b.122.1.2,c.116.1.5)*1+(c.116.1.5)*1
2cyj_1	118	118	20	18	13	4.680	0.645	0.593	0.567	0.687	0.586	0	0	1	1	0	0	A1o	A	(c.103.1.1)*1
2cyy_1	302	284	32	29	19	17.632	0.667	0.534	0.424	0.289	0.484	0	0	1	0	0	0	C2m=	C2	(a.4.5.0,d.58.4.2)*2
2cz9_1	346	321	33	25	20	16.500	0.733	0.563	0.487	0.605	0.536	0	0	1	0	0	0	A1m	A	(d.14.1.0,d.58.26.0)*1
2czr_1	226	195	36	21	14	10.584	1.029	0.568	0.465	0.687	0.521	0	0	1	0	0	0	A1o	A	(c.52.4.1)*1
2czv_1	651	619	57	31	20	35.340	1.118	0.569	0.472	0.536	0.532	0	0	1	0	0	0	C2o≠	C2	(c.6.3.2)*2+(d.58.59.1)*2
2d00_1	654	568	47	38	24	42.864	0.758	0.340	0.331	0.186	0.342	0	1	0	0	0	0	C2o=	C2	(c.149.1.1)*6
2d1s_1	539	519	40	27	26	28.080	0.755	0.503	0.458	0.499	0.493	0	0	1	0	0	0	A1o	A	(e.23.1.1)*1
2d1z_1	427	417	47	23	19	20.539	1.119	0.585	0.484	0.658	0.543	0	0	1	0	0	0	A1m	A	(c.1.8.3,b.42.2.0)*1
2d28_1	144	133	28	15	14	5.880	0.966	0.561	0.510	0.712	0.550	0	0	1	1	0	0	A1o	A	(d.52.10.1)*1
2d5b_1	500	463	53	24	20	25.440	1.205	0.574	0.487	0.649	0.543	0	0	1	0	0	0	A1m	A	(c.26.1.1,a.27.1.0)*1
2d5f_1	2307	2307	52	51	51	135.252	0.510	0.468	0.453	0.122	0.466	0	1	0	0	0	0	D3	D3	(b.82.1.0,b.82.1.0)*6
2d5r_1	368	357	42	24	20	20.160	0.955	0.543	0.469	0.576	0.521	0	0	1	0	0	0	A2	A	(c.55.3.9)*1+(d.370.1.1)*1
2d69_1	3342	3148	63	62	53	207.018	0.548	0.375	0.389	0.026	0.383	0	1	0	0	1	0	D4+	D4	(d.58.9.1,c.1.14.1)*8
2dbs_1	162	160	24	18	18	7.776	0.667	0.602	0.500	0.445	0.559	0	0	1	1	0	0	C2o=	C2	(d.374.1.1)*2
2dby_1	355	332	40	30	17	20.400	0.851	0.481	0.399	0.600	0.451	0	1	0	0	0	0	A1m	A	(c.37.1.0,d.15.10.0)*1
2dc4_1	328	318	49	20	19	18.620	1.256	0.494	0.450	0.591	0.489	0	1	0	0	0	0	C2o=	C2	(d.63.1.2)*2
2dd8_1	624	572	63	28	21	37.044	1.286	0.479	0.398	0.539	0.450	0	1	0	0	0	0	A3	A	(b.1.1.1,b.1.1.2)*2+(d.318.1.1)*1
2ddz_1	1130	1110	46	44	39	78.936	0.554	0.540	0.392	0.391	0.465	0	0	1	0	0	0	D3	D3	(d.104.1.4)*6
2dfa_1	988	860	42	40	38	63.840	0.538	0.513	0.360	0.264	0.439	0	0	1	0	0	0	D2	D2	(c.6.2.5)*4
2dge_1	406	389	34	32	27	29.376	0.576	0.462	0.354	0.212	0.409	0	1	0	0	0	0	D2	D2	(a.3.1.0)*4
2dhh_1	3066	2977	75	55	52	214.500	0.701	0.360	0.349	0.243	0.362	0	1	0	0	0	0	C3	C3	(f.35.1.1,d.58.44.1,d.58.44.1,d.225.1.1,f.35.1.1,d.58.44.1,d.58.44.1,d.225.1.1)*3
2di4_1	1053	960	63	63	14	55.566	0.818	0.536	0.445	0.237	0.497	0	0	1	0	0	0	C4+	C6	(a.269.1.1)*6
2dlb_1	140	127	31	14	12	5.208	1.192	0.611	0.553	0.574	0.588	0	0	1	1	0	0	C2o=	C2	(b.174.1.1)*2
2dm9_1	236	211	48	17	14	11.424	1.548	0.608	0.467	0.581	0.545	0	0	1	0	0	0	C2o=	C2	(d.81.4.1)*2
2dqn_1	988	851	55	31	30	51.150	0.902	0.566	0.442	0.574	0.513	0	0	1	0	0	0	A3	A	(a.137.12.1)*1+(c.117.1.1)*1+(d.128.1.5,a.182.1.2)*1
2dsr_1	219	196	27	21	20	11.340	0.659	0.524	0.427	0.636	0.487	0	0	1	0	0	0	A3	A	(g.1.1.1)*1+(g.28.1.1)*1+(g.3.9.1)*1
2dsx_1	52	52	13	12	10	1.560	0.591	0.640	0.606	0.492	0.637	0	0	1	1	0	0	A1o	A	(g.41.5.1)*1
2dsy_1	314	293	35	31	16	17.360	0.745	0.413	0.427	0.028	0.416	0	1	0	0	1	0	D2	D2	(d.304.1.2)*4
2dt8_1	280	275	31	25	16	12.400	0.756	0.591	0.521	0.606	0.564	0	0	1	1	0	0	A1o	A	(c.119.1.0)*1
2dvn_1	372	361	38	26	21	20.748	0.809	0.492	0.440	0.450	0.482	0	1	0	0	0	0	A2	A	(c.51.4.1)*2
2dwk_1	162	153	25	21	14	7.350	0.714	0.602	0.529	0.550	0.579	0	0	1	1	0	0	A1o	A	(a.256.1.1)*1
2dy1_1	660	599	60	32	23	44.160	1.091	0.431	0.343	0.568	0.395	0	1	0	0	0	0	A1m	A	(c.37.1.8,b.43.3.1,d.58.11.1,d.14.1.1,d.58.11.1)*1
2dyj_1	91	91	21	15	12	3.780	0.778	0.605	0.540	0.592	0.582	0	0	1	1	0	0	A1o	A	(d.52.7.1)*1
2dyn_1	1776	1720	58	58	40	134.560	0.592	0.245	0.320	0.001	0.283	1	0	0	0	1	0	D4+	D4	(b.55.1.1)*16
2e00_1	2742	2706	62	62	55	211.420	0.530	0.308	0.352	0.002	0.332	0	1	0	0	1	0	D3	D3	(d.3.1.1)*6
2e1b_1	216	202	35	18	16	10.080	1.029	0.558	0.488	0.670	0.535	0	0	1	0	0	0	A1m	A	(b.43.3.6,d.67.1.2)*1
2e2a_1	307	307	34	22	22	16.456	0.773	0.580	0.475	0.553	0.538	0	0	1	0	0	0	C3	C3	(a.7.2.1)*3
2e2d_1	345	336	34	26	20	17.680	0.739	0.536	0.467	0.658	0.513	0	0	1	0	0	0	A2	A	(b.40.3.1)*1+(d.92.1.11)*1
2e89_1	631	544	46	31	27	38.502	0.793	0.493	0.376	0.524	0.443	0	1	0	0	0	0	C2m=	C2	(c.26.2.5,d.229.1.1)*2
2eb6_1	2668	2516	62	61	46	173.972	0.579	0.478	0.379	0.072	0.427	0	1	0	0	0	0	D4+	D5	(d.177.1.0)*10
2ec5_1	711	646	58	45	18	46.980	0.921	0.450	0.370	0.587	0.423	0	1	0	0	0	0	A1m	A	(a.296.1.1,c.150.1.2,d.3.1.17)*1
2ed6_1	510	483	31	30	29	26.970	0.525	0.521	0.442	0.199	0.487	0	0	1	0	0	0	C3	C3	(b.170.1.1)*3
2eey_1	960	954	40	40	30	48.000	0.571	0.564	0.496	0.378	0.540	0	0	1	0	0	0	D3	D3	(d.58.21.0)*6
2ef0_1	287	268	31	23	18	12.834	0.756	0.562	0.505	0.604	0.545	0	0	1	1	0	0	A1m	A	(c.78.1.0,c.78.1.0)*1
2ef7_1	506	480	48	34	21	34.272	0.873	0.332	0.344	0.101	0.344	0	1	0	0	1	0	D2	D2	(d.37.1.1)*4
2eho_2	695	653	55	33	22	39.930	1.000	0.488	0.436	0.212	0.464	0	1	0	0	0	0	A4+	A	(a.278.1.1)*1+(a.278.1.4,d.344.1.0)*1+(d.344.1.0,a.278.1.2)*1+(d.344.1.4,a.278.1.3)*1
2ehz_1	2392	2392	56	55	50	154.000	0.533	0.247	0.371	0.000	0.310	1	0	0	0	1	0	D4+	D4	(d.32.1.0,d.32.1.0)*8
2eif_1	133	121	36	13	11	5.148	1.500	0.557	0.507	0.512	0.551	0	0	1	1	0	0	A1m	A	(b.34.5.2,b.40.4.5)*1
2eix_1	486	472	45	29	22	28.710	0.882	0.425	0.420	0.289	0.436	0	1	0	0	0	0	C2m=	C2	(b.43.4.0,c.25.1.0)*2
2ejb_1	352	342	40	21	18	15.120	1.026	0.596	0.526	0.624	0.570	0	0	1	1	0	0	C2o=	C2	(c.34.1.0)*2
2ekm_1	480	454	33	33	21	22.869	0.611	0.582	0.513	0.519	0.560	0	0	1	1	0	0	C3	C3	(d.256.1.0)*3
2elc_1	1316	1234	54	53	38	108.756	0.593	0.377	0.284	0.471	0.339	1	0	0	0	0	0	C2m=	C2	(a.46.2.1,c.27.1.1)*4
2end_1	137	124	27	17	11	5.049	0.964	0.610	0.557	0.584	0.588	0	0	1	1	0	0	A1o	A	(a.18.1.1)*1
2erl_1	40	40	16	9	8	1.152	0.941	0.651	0.590	0.720	0.629	0	0	1	1	0	0	A1o	A	(a.10.1.1)*1
2es4_2	592	542	41	29	25	29.725	0.759	0.566	0.445	0.646	0.520	0	0	1	0	0	0	A2	A	(a.137.15.1)*1+(c.69.1.18)*1
2es9_1	100	95	18	16	13	3.744	0.621	0.594	0.542	0.405	0.574	0	0	1	1	0	0	A1o	A	(a.247.1.1)*1
2etd_1	141	140	39	14	11	6.006	1.560	0.584	0.528	0.576	0.569	0	0	1	1	0	0	A1o	A	(a.29.9.1)*1
2euc_1	216	216	26	22	19	10.868	0.634	0.561	0.490	0.570	0.540	0	0	1	0	0	0	C2o=	C2	(a.249.1.1)*2
2eul_1	312	251	45	20	16	14.400	1.250	0.550	0.423	0.499	0.489	0	0	1	0	0	0	C2m=	C2	(a.2.1.1,d.26.1.2)*2
2ev6_1	273	263	38	30	17	19.380	0.809	0.496	0.358	0.622	0.430	0	1	0	0	0	0	C2m=	C2	(a.4.5.24,a.76.1.1)*2
2evr_1	444	416	46	22	21	21.252	1.070	0.549	0.454	0.607	0.513	0	0	1	0	0	0	C2m=	C2	(b.34.11.3,d.3.1.16)*2
2ewn_1	635	534	50	30	22	33.000	0.962	0.507	0.422	0.546	0.480	0	0	1	0	0	0	C2m=	C2	(a.4.5.1,d.104.1.2,b.34.1.1)*2
2ex3_1	766	699	52	32	30	49.920	0.839	0.420	0.381	0.160	0.406	0	1	0	0	0	0	A2	A	(a.263.1.1)*1+(c.55.3.5,e.8.1.1)*1
2ey4_2	453	405	48	32	18	27.648	0.960	0.531	0.406	0.583	0.477	0	0	1	0	0	0	A3	A	(b.43.3.5)*1+(d.265.1.2,b.122.1.1)*1+(g.41.16.1)*1
2eyi_1	234	228	33	19	16	10.032	0.943	0.598	0.528	0.648	0.574	0	0	1	1	0	0	A1m	A	(a.40.1.0,a.40.1.0)*1
2eyq_1	1146	1045	53	50	31	82.150	0.654	0.395	0.335	0.371	0.374	0	1	0	0	0	0	A1m	A	(c.37.1.19,c.37.1.19,b.34.18.1,c.37.1.19,c.37.1.19,d.315.1.1)*1
2f06_1	576	568	35	30	28	29.400	0.603	0.559	0.470	0.367	0.519	0	0	1	0	0	0	D2	D2	(d.58.18.11,d.58.18.11)*4
2f1f_1	321	296	30	27	20	16.200	0.638	0.570	0.462	0.559	0.529	0	0	1	0	0	0	C2m=	C2	(d.58.18.6,d.58.18.6)*2
2f1l_1	328	314	38	25	18	17.100	0.884	0.552	0.456	0.385	0.508	0	0	1	0	0	0	C2m=	C2	(b.43.3.4,b.41.1.4)*2
2f1m_2	471	374	57	38	15	32.490	1.075	0.482	0.317	0.620	0.408	0	1	0	0	0	0	A2	A	(f.46.1.0)*2
2f22_1	285	277	30	26	20	15.600	0.652	0.585	0.481	0.647	0.549	0	0	1	0	0	0	C2o=	C2	(a.213.1.2)*2
2f23_1	154	143	37	20	12	8.880	1.156	0.536	0.418	0.543	0.492	0	0	1	0	0	0	A1m	A	(a.2.1.1,d.26.1.2)*1
2f2b_1	980	960	37	36	32	42.624	0.544	0.594	0.530	0.428	0.571	0	0	1	1	0	0	C4+	C4	(f.19.1.0)*4
2f2h_1	4638	4219	81	80	53	343.440	0.609	0.366	0.342	0.077	0.352	0	1	0	0	0	0	D3	D3	(b.30.5.11,c.1.8.13,b.71.1.4,b.150.1.1)*6
2f3o_1	3092	2952	72	58	52	217.152	0.655	0.447	0.369	0.085	0.406	0	1	0	0	0	0	D2	D2	(c.7.1.0)*4
2f48_1	1103	1039	55	38	30	62.700	0.809	0.548	0.437	0.578	0.499	0	0	1	0	0	0	C2o=	C2	(c.89.1.1)*2
2f4i_2	178	170	27	23	13	8.073	0.750	0.583	0.510	0.638	0.557	0	0	1	1	0	0	A1o	A	(b.40.11.1)*1
2f4m_1	356	316	39	23	22	19.734	0.867	0.562	0.449	0.659	0.523	0	0	1	0	0	0	A2	A	(a.189.1.1)*1+(d.3.1.4)*1
2f5g_1	260	251	39	19	17	12.597	1.083	0.631	0.517	0.542	0.578	0	0	1	1	0	0	C2o=	C2	(d.58.57.1)*2
2f5v_1	2308	2216	68	48	47	153.408	0.716	0.442	0.389	0.075	0.419	0	1	0	0	0	0	D2	D2	(c.3.1.2,d.16.1.1)*4
2f62_1	316	296	32	22	22	15.488	0.727	0.577	0.494	0.666	0.551	0	0	1	0	0	0	C2o=	C2	(c.23.14.1)*2
2f8s_2	704	683	46	38	29	50.692	0.687	0.361	0.366	0.264	0.368	0	1	0	0	1	0	A1m	A	(b.34.14.1,c.44.3.1,c.55.3.15)*1
2f9z_1	347	319	43	22	17	16.082	1.103	0.560	0.483	0.603	0.534	0	0	1	0	0	0	A2	A	(d.194.1.3)*1+(d.252.1.1)*1
2fa1_1	318	314	37	23	20	17.020	0.860	0.568	0.456	0.520	0.515	0	0	1	0	0	0	C2o=	C2	(d.190.1.2)*2
2fb5_1	612	558	50	49	21	51.450	0.714	0.355	0.293	0.131	0.329	1	0	0	0	0	0	C3	C3	(d.320.1.1)*3
2fcl_1	157	154	25	22	15	8.250	0.676	0.547	0.490	0.624	0.531	0	0	1	0	0	0	A1o	A	(d.218.1.11)*1
2fcw_1	184	168	37	19	13	9.139	1.156	0.481	0.413	0.585	0.457	0	1	0	0	0	0	A2	A	(a.13.1.1)*1+(g.12.1.1,g.12.1.1)*1
2fdo_1	187	173	25	21	15	7.875	0.694	0.602	0.535	0.595	0.580	0	0	1	1	0	0	C2o=	C2	(d.337.1.1)*2
2fe8_1	315	283	45	22	15	14.850	1.216	0.610	0.478	0.558	0.549	0	0	1	0	0	0	A1m	A	(d.15.1.9,d.3.1.23)*1
2fef_1	847	807	47	46	27	58.374	0.644	0.468	0.376	0.339	0.432	0	1	0	0	0	0	C3	C3	(a.29.11.1,a.254.1.1)*3
2fez_1	373	362	40	28	19	21.280	0.851	0.490	0.419	0.533	0.468	0	1	0	0	0	0	A1m	A	(a.4.6.1,a.118.8.3,b.26.1.2)*1
2ffh_1	407	369	41	32	17	22.304	0.837	0.530	0.423	0.496	0.489	0	0	1	0	0	0	A1m	A	(a.24.13.1,c.37.1.10,a.36.1.1)*1
2ffm_1	83	80	19	14	12	3.192	0.731	0.585	0.531	0.536	0.571	0	0	1	1	0	0	A1o	A	(d.267.1.1)*1
2fg1_1	157	149	24	18	15	6.480	0.727	0.585	0.549	0.661	0.584	0	0	1	1	0	0	A1o	A	(c.50.1.2)*1
2fgg_1	84	69	30	11	8	2.640	1.579	0.648	0.519	0.602	0.587	0	0	1	1	0	0	A1o	A	(d.50.5.1)*1
2fgq_1	990	972	47	46	30	64.860	0.618	0.441	0.364	0.541	0.416	0	1	0	0	0	0	C3	C3	(f.4.3.1)*3
2fgz_1	926	812	51	33	29	48.807	0.823	0.567	0.442	0.567	0.514	0	0	1	0	0	0	A1m	A	(b.1.18.2,b.1.18.2,c.1.8.1,b.71.1.1)*1
2fh1_2	324	297	34	29	19	18.734	0.708	0.543	0.415	0.603	0.485	0	0	1	0	0	0	A1m	A	(d.109.1.1,d.109.1.1,d.109.1.1)*1
2fhz_1	199	192	25	19	17	8.075	0.694	0.593	0.551	0.479	0.581	0	0	1	1	0	0	A2	A	(d.243.1.2)*1+(d.311.1.1)*1
2fi0_1	79	74	16	12	11	2.112	0.696	0.530	0.594	0.543	0.572	0	0	1	1	1	0	A1o	A	(a.248.1.1)*1
2fid_1	206	192	46	20	13	11.960	1.394	0.423	0.399	0.375	0.416	0	1	0	0	0	0	A3	A	(d.15.1.1)*2+(g.39.1.15)*1
2fif_1	132	124	36	16	12	6.912	1.286	0.551	0.441	0.566	0.503	0	0	1	0	0	0	A2	A	(d.15.1.1)*1+(g.39.1.15)*1
2fim_1	456	424	48	27	21	27.216	1.000	0.469	0.407	0.563	0.447	0	1	0	0	0	0	A2	A	(d.23.1.1)*2
2fiy_1	285	277	30	25	18	13.500	0.698	0.584	0.497	0.538	0.550	0	0	1	0	0	0	A1o	A	(e.59.1.1)*1
2fj8_1	120	106	29	16	11	5.104	1.074	0.546	0.457	0.658	0.516	0	0	1	0	0	0	A1m	A	(g.3.13.1,g.3.13.1)*1
2fjh_1	1062	974	82	44	28	101.024	1.139	0.318	0.256	0.362	0.300	1	0	0	0	0	0	C2m≠	C2	(b.1.1.0,b.1.1.2)*2+(b.1.1.1)*2+(g.17.1.1)*2
2fju_1	873	789	61	41	22	55.022	0.968	0.514	0.397	0.568	0.465	0	0	1	0	0	0	A2	A	(b.55.1.1,a.39.1.7,c.1.18.1,b.7.1.1)*1+(c.37.1.8)*1
2fm8_1	479	424	53	27	20	28.620	1.128	0.533	0.397	0.603	0.474	0	0	1	0	0	0	A3	A	(a.257.1.1)*1+(d.198.1.0)*1+(d.198.1.1)*1
2fm9_1	201	186	25	24	14	8.400	0.658	0.575	0.507	0.714	0.551	0	0	1	1	0	0	A1o	A	(a.257.1.1)*1
2fma_1	59	57	22	10	8	1.760	1.222	0.651	0.611	0.577	0.644	0	0	1	1	0	0	A1o	A	(d.230.3.1)*1
2fmm_1	772	672	81	26	25	52.650	1.588	0.483	0.351	0.579	0.429	0	1	0	0	0	0	C2o≠	C2	(a.283.1.1)*2+(b.34.13.2)*8
2fn0_1	820	749	60	30	26	46.800	1.071	0.530	0.423	0.615	0.490	0	0	1	0	0	0	C2o=	C2	(d.161.1.1)*2
2fna_1	352	329	39	30	17	19.890	0.830	0.530	0.432	0.570	0.490	0	0	1	0	0	0	A1m	A	(c.37.1.20,a.4.5.11)*1
2fnj_1	403	373	53	22	18	20.988	1.325	0.516	0.440	0.348	0.482	0	0	1	0	0	0	A3	A	(b.29.1.22)*1+(d.15.1.1)*1+(d.42.1.1)*1
2fok_2	560	525	46	30	25	34.500	0.836	0.485	0.397	0.580	0.450	0	1	0	0	0	0	A1m	A	(a.4.5.12,a.4.5.12,a.4.5.12,c.52.1.12)*1
2fp1_1	329	305	44	21	18	16.632	1.128	0.564	0.451	0.566	0.516	0	0	1	0	0	0	C2o=	C2	(a.130.1.4)*2
2fp4_1	698	650	46	34	24	37.536	0.793	0.504	0.433	0.531	0.477	0	0	1	0	0	0	A2	A	(c.2.1.8,c.23.4.1)*1+(d.142.1.4,c.23.4.1)*1
2fpn_1	410	348	67	20	19	25.460	1.718	0.478	0.362	0.275	0.425	0	1	0	0	0	0	C2o=	C2	(d.129.10.1)*2
2fqm_2	139	124	23	21	12	5.796	0.697	0.620	0.526	0.415	0.576	0	0	1	1	0	0	C2o=	C2	(d.378.1.1)*2
2fr0_1	468	450	41	24	22	21.648	0.891	0.564	0.491	0.627	0.537	0	0	1	0	0	0	A1m	A	(c.2.1.2,c.2.1.2)*1
2fsq_1	232	228	29	24	17	11.832	0.707	0.501	0.492	0.365	0.508	0	0	1	0	0	0	A1o	A	(d.61.1.4)*1
2fsu_1	170	168	25	18	15	6.750	0.758	0.594	0.549	0.601	0.586	0	0	1	1	0	0	A1o	A	(c.67.2.1)*1
2ftx_1	149	142	26	17	16	7.072	0.788	0.608	0.502	0.570	0.562	0	0	1	1	0	0	A2	A	(d.300.1.1)*1+(d.300.1.2)*1
2fu5_1	264	248	37	22	17	13.838	0.949	0.540	0.462	0.568	0.516	0	0	1	0	0	0	A2	A	(b.88.1.1)*1+(c.37.1.8)*1
2fup_1	128	128	34	13	12	5.304	1.360	0.542	0.522	0.415	0.542	0	0	1	1	0	0	A1o	A	(a.47.5.1)*1
2fy8_1	1776	1660	68	66	29	130.152	0.716	0.409	0.335	0.022	0.356	0	1	0	0	0	0	D4+	D4	(c.2.1.9,d.286.1.1)*8
2fyg_1	128	114	24	16	14	5.376	0.800	0.607	0.503	0.637	0.570	0	0	1	1	0	0	A1o	A	(g.86.1.1)*1
2fyw_1	1600	1576	57	57	44	142.956	0.564	0.195	0.285	0.001	0.246	1	0	0	0	1	0	D3	D3	(c.135.1.1)*6
2fzt_1	157	151	45	14	12	7.560	1.731	0.532	0.487	0.613	0.520	0	0	1	0	0	0	C2o=	C2	(a.46.3.1)*2
2g2c_1	152	150	24	17	16	6.528	0.727	0.568	0.516	0.632	0.556	0	0	1	1	0	0	A1o	A	(c.57.1.1)*1
2g3r_1	119	107	24	14	12	4.032	0.923	0.596	0.573	0.603	0.599	0	0	1	1	0	0	A1m	A	(b.34.9.1,b.34.9.1)*1
2g45_1	193	168	34	17	15	8.670	1.062	0.490	0.423	0.663	0.464	0	1	0	0	0	0	A2	A	(d.15.1.1)*1+(g.44.1.5)*1
2g6t_1	612	583	47	39	26	47.658	0.723	0.310	0.317	0.061	0.316	0	1	0	0	1	0	C2o=	C2	(c.147.1.1)*2
2g6y_1	861	861	43	41	27	47.601	0.632	0.517	0.464	0.224	0.492	0	0	1	0	0	0	D2	D2	(d.22.1.0)*4
2g77_1	504	479	42	31	21	27.342	0.808	0.562	0.481	0.563	0.534	0	0	1	0	0	0	A2	A	(a.69.2.1,a.69.2.1)*1+(c.37.1.8)*1
2g7o_1	272	244	28	22	22	13.552	0.636	0.586	0.470	0.447	0.534	0	0	1	0	0	0	C4+	C4	(a.241.1.1)*4
2g81_1	279	262	30	20	19	11.400	0.769	0.625	0.519	0.713	0.581	0	0	1	1	0	0	A2	A	(b.47.1.2)*1+(g.3.13.1)*1
2g82_1	1320	1264	44	43	40	75.680	0.530	0.525	0.410	0.450	0.475	0	0	1	0	0	0	D2	D2	(c.2.1.3,d.81.1.1)*4
2g8l_1	571	560	49	26	23	29.302	1.000	0.331	0.410	0.092	0.367	0	1	0	0	1	0	C2o=	C2	(e.50.1.1)*2
2ga4_1	633	605	47	29	25	34.075	0.870	0.549	0.465	0.491	0.517	0	0	1	0	0	0	A4+	A	(b.40.2.1)*5+(d.165.1.2)*1
2ga6_1	1419	1419	44	43	43	81.356	0.512	0.287	0.379	0.009	0.324	1	0	0	0	1	0	TOI	T	(g.86.1.1)*12
2ga9_1	733	695	46	41	23	43.378	0.719	0.534	0.432	0.478	0.489	0	0	1	0	0	0	A2	A	(c.66.1.25)*1+(e.69.1.1)*1
2gax_1	135	120	22	18	15	5.940	0.667	0.559	0.450	0.616	0.512	0	0	1	0	0	0	A1o	A	(c.131.1.1)*1
2gb5_1	526	489	37	31	31	35.557	0.597	0.492	0.371	0.502	0.440	0	1	0	0	0	0	C2m=	C2	(d.113.1.4,g.41.14.1,d.113.1.4)*2
2gbl_1	2968	2926	64	56	55	197.120	0.577	0.387	0.391	0.022	0.387	0	1	0	0	1	0	C4+	C6	(c.37.1.11,c.37.1.11)*6
2gc4_1	759	730	55	31	27	46.035	0.948	0.502	0.406	0.625	0.464	0	0	1	0	0	0	A4+	A	(a.3.1.1)*1+(b.6.1.1)*1+(b.69.2.0)*1+(g.21.1.1)*1
2ge7_1	215	193	31	20	14	8.680	0.912	0.621	0.540	0.487	0.594	0	0	1	1	0	0	C2o=	C2	(d.254.1.2)*2
2gec_1	277	252	35	22	19	14.630	0.854	0.531	0.453	0.502	0.506	0	0	1	0	0	0	A2	A	(b.148.1.1)*2
2gep_1	472	454	33	30	25	24.750	0.600	0.572	0.473	0.556	0.529	0	0	1	0	0	0	A1m	A	(d.58.36.1,d.134.1.1,d.58.36.1,d.134.1.1)*1
2gf4_1	328	314	31	30	17	15.810	0.660	0.572	0.488	0.369	0.541	0	0	1	0	0	0	D2	D2	(a.8.10.1)*4
2gfq_1	846	773	63	41	24	61.992	0.969	0.361	0.327	0.114	0.345	0	1	0	0	0	0	A3	A	(c.56.7.1)*3
2gg2_1	263	257	26	23	19	11.362	0.619	0.595	0.536	0.675	0.576	0	0	1	1	0	0	A1o	A	(d.127.1.1)*1
2ghp_1	935	859	55	34	33	61.710	0.821	0.457	0.373	0.058	0.409	0	1	0	0	0	0	D2	D2	(d.58.7.1,d.58.7.1,d.58.7.1)*4
2ghv_1	366	307	37	25	20	18.500	0.822	0.524	0.434	0.565	0.490	0	0	1	0	0	0	C2o=	C2	(d.318.1.1)*2
2ghw_1	423	397	46	29	17	22.678	1.000	0.608	0.460	0.466	0.540	0	0	1	0	0	0	A2	A	(b.1.1.1,b.1.1.1)*1+(d.318.1.1)*1
2gix_1	818	772	43	42	27	48.762	0.623	0.466	0.421	0.248	0.455	0	1	0	0	0	0	C4+	C4	(b.1.18.16)*4
2gj3_1	238	226	31	20	20	12.400	0.775	0.503	0.443	0.590	0.488	0	0	1	0	0	0	C2o=	C2	(d.110.3.0)*2
2gk6_1	602	555	40	36	25	36.000	0.656	0.447	0.396	0.332	0.430	0	1	0	0	0	0	A1m	A	(c.37.1.19,b.49.4.1,c.37.1.19)*1
2gke_1	274	262	30	21	18	11.340	0.769	0.615	0.543	0.466	0.588	0	0	1	1	0	0	A1m	A	(d.21.1.1,d.21.1.1)*1
2gkp_1	164	161	23	22	15	7.590	0.622	0.561	0.504	0.471	0.546	0	0	1	1	0	0	A1o	A	(d.351.1.1)*1
2gkt_1	51	47	14	14	8	1.568	0.636	0.712	0.584	0.790	0.646	0	0	1	1	0	0	A1o	A	(g.68.1.1)*1
2glk_1	1552	1516	49	44	37	79.772	0.605	0.530	0.484	0.513	0.523	0	0	1	0	0	0	D2	D2	(c.1.15.3)*4
2glz_1	297	286	33	28	15	13.860	0.767	0.590	0.481	0.606	0.539	0	0	1	0	0	0	C2o=	C2	(d.81.3.1)*2
2gmh_1	581	547	36	33	24	28.512	0.632	0.555	0.484	0.438	0.525	0	0	1	0	0	0	A1m	A	(c.3.1.2,d.16.1.8,d.58.1.6)*1
2gno_1	296	285	39	23	18	16.146	0.951	0.477	0.424	0.174	0.446	0	1	0	0	0	0	A1m	A	(c.37.1.20,a.80.1.1)*1
2gnu_1	816	766	50	36	27	48.600	0.794	0.469	0.410	0.648	0.458	0	1	0	0	0	0	A3	A	(f.23.10.0,b.41.1.1)*1+(f.26.1.1)*2
2gnx_1	288	271	47	18	17	14.382	1.343	0.579	0.478	0.591	0.538	0	0	1	0	0	0	A1m	A	(a.246.3.1,d.109.3.1)*1
2gol_1	237	212	36	20	17	12.240	0.973	0.523	0.439	0.552	0.494	0	0	1	0	0	0	A2	A	(a.61.1.1)*1+(a.73.1.1)*1
2gom_1	121	108	33	13	12	5.148	1.320	0.556	0.489	0.391	0.531	0	0	1	0	0	0	C2o=	C2	(a.7.17.1)*2
2gp4_1	523	504	41	29	24	28.536	0.774	0.532	0.445	0.566	0.499	0	0	1	0	0	0	A1m	A	(d.334.1.1,c.8.2.2)*1
2gpi_1	91	84	21	13	11	3.003	0.875	0.630	0.588	0.715	0.614	0	0	1	1	0	0	A1o	A	(d.354.1.1)*1
2gqv_1	236	228	28	24	18	12.096	0.667	0.499	0.458	0.203	0.489	0	1	0	0	0	0	D2	D2	(b.34.4.1)*4
2gqw_1	802	754	49	36	31	54.684	0.731	0.367	0.341	0.317	0.366	0	1	0	0	0	0	C2m=	C2	(c.3.1.5,c.3.1.5,d.87.1.1)*2
2gr8_1	234	233	29	17	16	7.888	0.879	0.606	0.570	0.366	0.595	0	0	1	1	0	0	C3	C3	(d.24.1.4)*3
2grk_1	228	207	29	20	15	8.700	0.829	0.597	0.529	0.634	0.574	0	0	1	1	0	0	A1o	A	(b.27.1.1)*1
2grr_1	314	294	43	23	18	17.802	1.049	0.513	0.426	0.506	0.484	0	0	1	0	0	0	A2	A	(a.118.12.1)*1+(d.20.1.1)*1
2gs5_1	193	182	27	19	16	8.208	0.771	0.608	0.507	0.588	0.566	0	0	1	1	0	0	A1o	A	(d.310.1.1)*1
2gsk_1	671	659	45	29	27	35.235	0.804	0.445	0.438	0.572	0.458	0	1	0	0	0	0	A2	A	(d.212.1.2)*1+(f.4.3.3)*1
2gsv_1	135	126	22	22	12	5.808	0.647	0.645	0.555	0.591	0.613	0	0	1	1	0	0	C2o=	C2	(a.23.7.1)*2
2gtc_1	515	515	29	28	27	21.924	0.527	0.483	0.501	0.155	0.493	0	1	0	0	1	0	C4+	C5	(d.230.5.1)*5
2gts_1	77	70	36	11	8	3.168	1.895	0.587	0.526	0.310	0.557	0	0	1	1	0	0	A1o	A	(a.25.5.1)*1
2gud_1	242	242	28	19	19	10.108	0.737	0.562	0.509	0.489	0.545	0	0	1	1	0	0	C2o=	C2	(b.77.3.1)*2
2guk_1	446	446	39	32	23	28.704	0.709	0.512	0.414	0.165	0.462	0	0	1	0	0	0	D2	D2	(d.360.1.1)*4
2gum_1	1732	1631	105	38	37	147.630	1.400	0.391	0.304	0.454	0.366	0	1	0	0	0	0	C3	C3	(e.76.1.1)*3
2gvi_1	402	370	33	26	21	18.018	0.702	0.591	0.500	0.528	0.556	0	0	1	1	0	0	C2m=	C2	(d.81.3.1,g.39.1.18)*2
2gvk_1	1854	1842	50	49	48	117.600	0.515	0.429	0.407	0.148	0.424	0	1	0	0	0	0	D3	D3	(d.58.4.14)*6
2gwf_2	260	250	40	19	18	13.680	1.081	0.559	0.466	0.559	0.523	0	0	1	0	0	0	A2	A	(c.46.1.4)*1+(d.345.1.1)*1
2gx9_1	249	237	34	20	20	13.600	0.850	0.546	0.422	0.540	0.491	0	0	1	0	0	0	C2o=	C2	(d.299.1.1)*2
2h1l_1	3368	3170	90	89	32	256.320	0.744	0.457	0.344	0.431	0.403	0	1	0	0	0	0	C4+	C6	(b.2.5.2)*6+(c.37.1.20)*6
2h1t_1	370	345	51	21	18	19.278	1.308	0.583	0.469	0.509	0.534	0	0	1	0	0	0	C2o=	C2	(b.178.1.1)*2
2h21_2	440	391	45	27	24	29.160	0.882	0.419	0.354	0.331	0.393	0	1	0	0	0	0	A1m	A	(b.85.7.3,a.166.1.1)*1
2h2b_1	214	208	35	20	17	11.900	0.946	0.366	0.397	0.279	0.393	0	1	0	0	1	0	C2o=	C2	(b.36.1.1)*2
2h2i_1	1952	1952	52	51	51	135.252	0.510	0.307	0.363	0.001	0.330	0	1	0	0	1	0	D4+	D4	(c.31.1.0)*8
2h4o_1	496	488	35	35	31	37.975	0.530	0.251	0.301	0.000	0.262	1	0	0	0	1	0	D4+	D4	(d.368.1.1)*8
2h61_1	728	709	43	40	31	53.320	0.606	0.437	0.371	0.201	0.410	0	1	0	0	0	0	D2	D2	(a.39.1.2)*8
2h64_1	582	518	52	31	25	40.300	0.929	0.441	0.335	0.360	0.397	0	1	0	0	0	0	C2o≠	C2	(g.17.1.2)*2+(g.7.1.3)*4
2h6b_1	1896	1888	66	52	43	147.576	0.695	0.392	0.343	0.085	0.366	0	1	0	0	0	0	D2	D2	(b.82.3.2,a.4.5.4)*8
2h85_1	2082	1998	64	49	49	153.664	0.653	0.414	0.339	0.286	0.382	0	1	0	0	0	0	D3	D3	(c.66.1.48,d.294.1.2)*6
2h8e_1	240	224	28	21	20	11.760	0.683	0.542	0.475	0.521	0.521	0	0	1	0	0	0	C2o=	C2	(d.79.6.1)*2
2h9g_1	534	482	45	30	23	31.050	0.849	0.412	0.377	0.377	0.400	0	1	0	0	0	0	A3	A	(b.1.1.0,b.1.1.2)*1+(b.1.1.1,b.1.1.2)*1+(g.24.1.1,g.24.1.1,g.24.1.1)*1
2h9g_2	490	461	46	27	23	28.566	0.920	0.424	0.395	0.253	0.417	0	1	0	0	0	0	A3	A	(b.1.1.0,b.1.1.2)*1+(b.1.1.1,b.1.1.2)*1+(g.24.1.1)*1
2hba_1	52	49	18	12	8	1.728	0.900	0.575	0.544	0.724	0.580	0	0	1	1	0	0	A1o	A	(d.100.1.1)*1
2hbj_1	390	372	43	25	22	23.650	0.915	0.504	0.420	0.534	0.470	0	0	1	0	0	0	A1m	A	(c.55.3.5,a.60.8.4)*1
2hbw_1	221	212	31	21	14	9.114	0.886	0.605	0.522	0.546	0.573	0	0	1	1	0	0	A1m	A	(b.34.11.0,d.3.1.16)*1
2hcb_1	1272	1175	75	38	34	96.900	1.042	0.374	0.327	0.390	0.355	0	1	0	0	0	0	A4+	A	(c.37.1.20,a.4.12.2)*4
2hd3_2	561	560	40	38	20	30.400	0.690	0.332	0.414	0.010	0.370	0	1	0	0	1	0	C4+	C6	(b.40.15.1)*6
2hdz_1	66	64	27	16	8	3.456	1.125	0.583	0.447	0.743	0.519	0	0	1	0	0	0	A1o	A	(a.21.1.1)*1
2hek_1	1476	1406	57	43	40	98.040	0.687	0.507	0.415	0.206	0.465	0	0	1	0	0	0	D2	D2	(a.211.1.1)*4
2hf1_1	61	55	18	12	9	1.944	0.857	0.641	0.546	0.524	0.590	0	0	1	1	0	0	A1o	A	(b.171.1.1)*1
2hh6_1	224	186	40	17	13	8.840	1.333	0.552	0.494	0.471	0.537	0	0	1	0	0	0	C2o=	C2	(a.69.4.1)*2
2hhp_1	508	489	37	35	25	32.375	0.617	0.452	0.396	0.175	0.424	0	1	0	0	0	0	A1m	A	(d.218.1.3,a.160.1.1,d.58.16.1)*1
2hi7_1	322	316	44	25	19	20.900	1.000	0.439	0.376	0.470	0.411	0	1	0	0	0	0	A2	A	(a.29.15.1)*1+(c.47.1.13)*1
2hj9_1	1081	1021	64	35	32	71.680	0.955	0.470	0.391	0.514	0.440	0	1	0	0	0	0	A4+	A	(c.93.1.1)*2+(d.110.6.3)*2
2hkj_1	461	421	40	35	20	28.000	0.727	0.493	0.405	0.483	0.459	0	1	0	0	0	0	A1m	A	(d.122.1.2,a.156.1.3,d.14.1.3)*1
2hkq_1	272	234	41	23	13	12.259	1.139	0.610	0.473	0.598	0.547	0	0	1	0	0	0	C2o≠	C2	(a.245.1.1)*2+(b.34.10.1)*2
2hld_1	3289	3043	62	59	57	208.506	0.534	0.421	0.385	0.404	0.410	0	1	0	0	0	0	A4+	A	(a.137.8.1)*1+(b.49.1.1,c.37.1.11,a.69.1.1)*6+(b.93.1.1,a.2.10.1)*1+(c.49.2.1)*1
2hmq_1	904	904	42	42	34	59.976	0.553	0.356	0.393	0.000	0.362	0	1	0	0	1	0	D4+	D4	(a.24.4.1)*8
2hmq_2	226	210	31	19	18	10.602	0.838	0.596	0.519	0.567	0.571	0	0	1	1	0	0	C2o=	C2	(a.24.4.1)*2
2hng_1	250	222	47	18	14	11.844	1.469	0.619	0.495	0.480	0.567	0	0	1	0	0	0	C2o=	C2	(d.33.1.2)*2
2hnu_1	162	156	25	16	16	6.400	0.781	0.627	0.494	0.497	0.567	0	0	1	0	0	0	C2o=	C2	(b.9.1.1)*2
2hq4_2	159	155	28	20	13	7.280	0.848	0.629	0.543	0.536	0.600	0	0	1	1	0	0	A1o	A	(d.342.1.1)*1
2hqs_1	520	490	52	24	22	27.456	1.130	0.578	0.464	0.557	0.530	0	0	1	0	0	0	A2	A	(c.51.2.1,b.68.4.1)*1+(d.79.7.1)*1
2hqt_10	121	112	25	15	13	4.875	0.893	0.627	0.534	0.653	0.591	0	0	1	1	0	0	A1o	A	(a.45.1.2)*1
2hqy_1	594	552	48	32	22	33.792	0.889	0.501	0.439	0.612	0.483	0	0	1	0	0	0	C2m=	C2	(d.108.1.4,d.108.1.4)*2
2hs1_1	198	192	30	19	14	7.980	0.909	0.535	0.523	0.519	0.542	0	0	1	1	0	0	C2o=	C2	(b.50.1.1)*2
2hs3_1	602	596	46	28	23	29.624	0.902	0.539	0.499	0.637	0.533	0	0	1	0	0	0	A1m	A	(d.79.4.1,d.139.1.1,d.79.4.1,d.139.1.1)*1
2hs5_1	207	198	30	20	17	10.200	0.811	0.556	0.469	0.618	0.526	0	0	1	0	0	0	A1m	A	(a.4.5.6,a.78.1.1)*1
2hsg_1	328	290	43	21	17	15.351	1.132	0.507	0.433	0.319	0.475	0	0	1	0	0	0	A1m	A	(a.35.1.5,c.93.1.1)*1
2hth_1	202	184	31	19	17	10.013	0.861	0.548	0.458	0.604	0.510	0	0	1	0	0	0	A2	A	(b.55.1.12)*1+(d.15.1.1)*1
2htm_2	603	585	68	24	20	32.640	1.545	0.570	0.448	0.577	0.522	0	0	1	0	0	0	C2o≠	C2	(c.1.31.0)*2+(d.15.3.2)*2
2hue_1	321	306	36	31	16	17.856	0.766	0.536	0.444	0.485	0.499	0	0	1	0	0	0	A3	A	(a.22.1.1)*2+(b.1.22.1)*1
2huh_1	294	280	41	23	15	14.145	1.079	0.611	0.518	0.597	0.578	0	0	1	1	0	0	C2o=	C2	(b.7.5.1)*2
2hw4_1	116	110	23	16	13	4.784	0.793	0.641	0.547	0.599	0.609	0	0	1	1	0	0	A1o	A	(d.322.1.1)*1
2hwj_1	773	764	41	37	33	50.061	0.586	0.364	0.391	0.169	0.383	0	1	0	0	1	0	D2	D2	(d.268.1.3)*4
2hxv_1	698	648	56	42	21	49.392	0.889	0.427	0.339	0.550	0.389	0	1	0	0	0	0	C2m=	C2	(c.97.1.2,c.71.1.2)*2
2hyd_1	1156	1079	72	36	29	75.168	1.108	0.480	0.388	0.473	0.441	0	1	0	0	0	0	C2m=	C2	(f.37.1.1,c.37.1.12)*2
2hz5_1	173	157	27	18	15	7.290	0.818	0.592	0.531	0.605	0.578	0	0	1	1	0	0	C2o=	C2	(d.110.7.1)*2
2i00_2	794	774	50	33	32	52.800	0.769	0.516	0.411	0.409	0.474	0	0	1	0	0	0	C2m=	C2	(d.108.1.10,d.106.1.4)*2
2i0u_1	732	729	37	37	35	47.915	0.514	0.258	0.345	0.010	0.295	1	0	0	0	1	0	D3	D3	(a.133.1.2)*6
2i0z_1	416	402	51	23	18	21.114	1.244	0.521	0.450	0.484	0.493	0	0	1	0	0	0	A1m	A	(c.3.1.8,e.74.1.1)*1
2i15_1	359	306	48	29	21	29.232	0.960	0.349	0.278	0.371	0.315	1	0	0	0	0	0	A3	A	(a.291.1.1)*3
2i1q_1	311	292	35	24	19	15.960	0.814	0.536	0.445	0.630	0.506	0	0	1	0	0	0	A1m	A	(a.60.4.1,c.37.1.11)*1
2i1s_2	181	167	33	19	13	8.151	1.031	0.619	0.518	0.500	0.578	0	0	1	1	0	0	A1o	A	(d.343.1.1)*1
2i5h_1	178	166	36	17	13	7.956	1.200	0.615	0.523	0.545	0.583	0	0	1	1	0	0	A1o	A	(e.71.1.1)*1
2i5i_1	1566	1551	52	44	44	100.672	0.591	0.439	0.406	0.306	0.430	0	1	0	0	0	0	D3	D3	(c.6.2.8)*6
2i5n_1	1178	1112	73	36	29	76.212	1.123	0.472	0.394	0.398	0.445	0	1	0	0	0	0	A4+	A	(a.138.1.2)*1+(f.23.10.1,b.41.1.1)*1+(f.26.1.1)*2
2i5u_1	77	77	17	15	11	2.805	0.654	0.624	0.590	0.495	0.617	0	0	1	1	0	0	A1o	A	(a.275.1.1)*1
2i5v_1	246	225	46	23	13	13.754	1.278	0.514	0.396	0.540	0.461	0	0	1	0	0	0	A1o	A	(b.76.1.1)*1
2i71_1	747	677	51	41	20	41.820	0.836	0.518	0.442	0.624	0.492	0	0	1	0	0	0	C2o=	C2	(e.72.1.1)*2
2i7c_1	562	548	43	27	23	26.703	0.860	0.582	0.511	0.483	0.549	0	0	1	1	0	0	C2o=	C2	(c.66.1.0)*2
2i8d_1	242	234	27	23	18	11.178	0.659	0.515	0.488	0.560	0.505	0	0	1	0	0	0	C2o=	C2	(d.198.4.1)*2
2i9a_2	127	116	27	18	12	5.832	0.900	0.590	0.484	0.498	0.547	0	0	1	0	0	0	A1m	A	(g.3.11.1,g.14.1.1)*1
2i9i_1	442	420	50	30	15	22.500	1.111	0.590	0.498	0.596	0.560	0	0	1	0	0	0	C2o=	C2	(c.51.6.1)*2
2i9w_1	177	165	29	18	17	8.874	0.829	0.586	0.474	0.628	0.546	0	0	1	0	0	0	A1m	A	(g.74.1.1,d.17.4.30,g.74.1.1)*1
2i9x_1	171	152	28	19	14	7.448	0.848	0.611	0.504	0.478	0.566	0	0	1	1	0	0	C2o=	C2	(d.366.1.1)*2
2ia1_1	339	307	37	24	23	20.424	0.787	0.580	0.455	0.573	0.526	0	0	1	0	0	0	C2o=	C2	(d.359.1.1)*2
2ia7_1	111	99	24	16	12	4.608	0.857	0.595	0.507	0.550	0.558	0	0	1	1	0	0	A1o	A	(d.373.1.1)*1
2iaf_1	140	135	20	19	15	5.700	0.588	0.626	0.562	0.546	0.604	0	0	1	1	0	0	A1o	A	(d.81.2.1)*1
2iay_1	114	106	22	16	14	4.928	0.733	0.592	0.517	0.463	0.567	0	0	1	1	0	0	A1o	A	(d.376.1.1)*1
2iaz_1	441	394	37	35	20	25.900	0.673	0.365	0.361	0.494	0.383	0	1	0	0	0	0	D2	D2	(a.281.1.2)*4
2ibg_2	355	332	51	24	16	19.584	1.275	0.547	0.446	0.581	0.507	0	0	1	0	0	0	A2	A	(b.1.2.1,b.1.2.1)*1+(d.65.1.2)*1
2ibz_1	2179	1845	99	62	34	208.692	1.031	0.347	0.254	0.376	0.312	1	0	0	0	0	0	A4+	A	(a.3.1.3,f.23.11.1)*1+(b.1.1.1)*2+(d.185.1.1,d.185.1.1)*2+(f.21.1.2,f.32.1.1)*1+(f.23.12.1,b.33.1.1)*1+(f.23.13.1)*1+(f.23.14.1)*1+(f.27.1.1)*1+(f.28.1.1)*1
2ich_2	323	313	27	25	23	15.525	0.562	0.579	0.514	0.604	0.563	0	0	1	1	0	0	A1o	A	(b.176.1.1)*1
2icu_2	213	200	24	21	18	9.072	0.615	0.620	0.534	0.646	0.584	0	0	1	1	0	0	A1o	A	(d.303.1.0)*1
[truncated: 1,595 more rows]
