# Supplementary material for: Improved Assessment of Globularity of Protein Structures and the Ellipsoid Profile of the Biological Assemblies from the PDB
Source: Biomolecules. 2023 Feb 17;13(2):385. doi: 10.3390/biom13020385 (PMC9953691; doi:10.3390/biom13020385)
Supplement: Supplementary file 1 [file biomolecules-13-00385-s001.zip › s9.tsv]

ASSEMBLY	EFFECTIVE	GUIDES	R_X	R_Y	R_Z	V	T	EI_0.3	EI_1.0	EP_0.1	EP_1.0	C_N	C_S	C_G	C_H	C_U	C_E	GROUP	SYMMETRY	FINGERPRINT
16vp_1	311	311	48	23	18	19.872	1.171	0.554	0.432	0.621	0.508	0	0	1	0	0	0	A1o	A	(d.180.1.1)*1
1914_1	171	171	35	21	18	13.230	0.897	0.561	0.381	0.616	0.478	0	0	1	0	0	0	A1m	A	(d.49.1.1,d.49.1.1)*1
1a0p_1	271	271	39	25	21	20.475	0.848	0.538	0.397	0.557	0.475	0	0	1	0	0	0	A1m	A	(a.60.9.1,d.163.1.1)*1
1a12_1	1203	1203	56	52	37	107.744	0.629	0.484	0.342	0.282	0.421	0	1	0	0	0	0	C3	C3	(b.69.5.1)*3
1a17_1	636	636	67	32	22	47.168	1.241	0.486	0.373	0.214	0.428	0	1	0	0	0	0	D2	D2	(a.118.8.1)*4
1a19_1	178	178	30	18	16	8.640	0.882	0.566	0.506	0.405	0.543	0	0	1	1	0	0	C2o=	C2	(c.9.1.1)*2
1a2o_1	347	347	40	22	21	18.480	0.930	0.566	0.479	0.445	0.533	0	0	1	0	0	0	A1m	A	(c.23.1.1,c.40.1.1)*1
1a2y_1	352	352	44	30	21	27.720	0.863	0.535	0.357	0.606	0.451	0	0	1	0	0	0	A3	A	(b.1.1.1)*2+(d.2.1.2)*1
1a2z_1	880	880	52	41	28	59.696	0.754	0.511	0.413	0.502	0.475	0	0	1	0	0	0	D2	D2	(c.56.4.1)*4
1a32_1	85	85	33	22	12	8.712	0.971	0.326	0.235	0.237	0.285	1	0	0	0	0	0	A1o	A	(a.16.1.2)*1
1a45_1	346	346	59	18	17	18.054	1.686	0.622	0.505	0.596	0.567	0	0	1	1	0	0	C2m=	C2	(b.11.1.1,b.11.1.1)*2
1a4y_1	1166	1166	60	36	34	73.440	0.857	0.369	0.380	0.020	0.364	0	1	0	0	1	0	C2o≠	C2	(c.10.1.1)*2+(d.5.1.1)*2
1a5t_1	648	648	66	33	33	71.874	1.000	0.293	0.256	0.017	0.271	1	0	0	0	0	0	C2m=	C2	(c.37.1.20,a.80.1.1)*2
1a62_1	125	125	25	18	15	6.750	0.758	0.594	0.460	0.544	0.534	0	0	1	0	0	0	A1m	A	(a.140.3.1,b.40.4.5)*1
1a79_1	684	684	59	35	26	53.690	0.967	0.521	0.381	0.374	0.457	0	0	1	0	0	0	C2m=	C2	(d.75.1.1,c.52.2.1)*4
1a8d_1	452	452	48	27	27	34.992	0.889	0.535	0.384	0.565	0.469	0	0	1	0	0	0	A1m	A	(b.29.1.6,b.42.4.2)*1
1a8l_1	452	452	40	29	28	32.480	0.702	0.511	0.378	0.566	0.451	0	0	1	0	0	0	C2m=	C2	(c.47.1.2,c.47.1.2)*2
1a8r_1	2210	2210	57	57	37	120.213	0.606	0.430	0.444	0.136	0.431	0	1	0	0	1	0	D4+	D5	(d.96.1.1)*10
1aa7_1	315	315	38	22	21	17.556	0.884	0.563	0.460	0.564	0.526	0	0	1	0	0	0	C2o=	C2	(a.95.1.1)*2
1aap_1	112	112	25	21	12	6.300	0.758	0.545	0.437	0.665	0.502	0	0	1	0	0	0	C2o=	C2	(g.8.1.1)*2
1adu_1	573	573	67	34	30	68.340	1.047	0.327	0.242	0.350	0.295	1	0	0	0	0	0	A2	A	(a.54.1.1,g.51.1.1,g.51.1.1)*2
1ae9_1	1011	1011	63	62	28	109.368	0.700	0.454	0.280	0.307	0.363	1	0	0	0	0	0	C3	C3	(d.163.1.1)*6
1aep_1	153	153	37	15	13	7.215	1.321	0.588	0.503	0.528	0.556	0	0	1	1	0	0	A1o	A	(a.63.1.1)*1
1af7_1	274	274	42	28	18	21.168	0.913	0.419	0.351	0.462	0.393	0	1	0	0	0	0	A1m	A	(a.58.1.1,c.66.1.8)*1
1afv_1	1176	1176	103	48	31	153.264	1.304	0.319	0.218	0.220	0.273	1	0	0	0	0	0	C2m≠	C2	(a.73.1.1)*2+(b.1.1.1,b.1.1.2)*4
1ah7_1	245	245	32	24	17	13.056	0.780	0.616	0.509	0.594	0.576	0	0	1	1	0	0	A1o	A	(a.124.1.1)*1
1ahs_1	378	378	30	30	23	20.700	0.566	0.546	0.443	0.283	0.498	0	0	1	0	0	0	C3	C3	(b.19.1.1)*3
1ahu_1	4440	4440	84	83	48	334.656	0.641	0.435	0.379	0.074	0.413	0	1	0	0	0	0	D4+	D4	(d.145.1.1,d.58.32.1)*8
1ahw_1	1256	1256	106	51	40	216.240	1.165	0.249	0.171	0.353	0.218	1	0	0	0	0	0	A4+	A	(b.1.1.1,b.1.1.2)*4+(b.1.2.1,b.1.2.1)*2
1aie_1	124	124	22	20	18	7.920	0.579	0.588	0.441	0.419	0.521	0	0	1	0	0	0	D2	D2	(a.53.1.1)*4
1ail_1	140	140	23	18	17	7.038	0.657	0.549	0.493	0.466	0.534	0	0	1	0	0	0	C2o=	C2	(a.16.1.1)*2
1aip_1	1136	1136	79	53	44	184.228	0.814	0.309	0.185	0.438	0.256	1	0	0	0	0	0	C2m≠	C2	(a.5.2.2,d.43.1.1)*2+(c.37.1.8,b.43.3.1,b.44.1.1)*2
1ajj_1	37	37	15	11	8	1.320	0.789	0.690	0.547	0.725	0.632	0	0	1	1	0	0	A1o	A	(g.12.1.1)*1
1aol_1	228	228	33	29	17	16.269	0.717	0.537	0.390	0.643	0.478	0	0	1	0	0	0	A1o	A	(b.20.1.1)*1
1aom_1	998	998	56	39	36	78.624	0.747	0.511	0.356	0.428	0.443	0	0	1	0	0	0	A2	A	(a.3.1.2,b.70.2.1)*1+(b.70.2.1)*1
1aor_1	1210	1210	71	36	32	81.792	1.044	0.486	0.408	0.485	0.459	0	1	0	0	0	0	C2m=	C2	(d.152.1.1,a.110.1.1)*2
1aoz_1	1104	1104	77	43	39	129.129	0.939	0.403	0.269	0.271	0.343	1	0	0	0	0	0	C2m=	C2	(b.6.1.3,b.6.1.3,b.6.1.3)*2
1apx_1	498	498	41	29	27	32.103	0.732	0.513	0.406	0.563	0.474	0	0	1	0	0	0	C2o=	C2	(a.93.1.1)*2
1aqt_1	270	270	35	32	26	29.120	0.603	0.317	0.250	0.198	0.288	1	0	0	0	0	0	C2m=	C2	(b.93.1.1,a.2.10.1)*2
1aro_1	923	923	58	49	36	102.312	0.682	0.370	0.272	0.477	0.329	1	0	0	0	0	0	A2	A	(d.118.1.1)*1+(e.8.1.3)*1
1at0_1	290	290	31	26	23	18.538	0.633	0.553	0.415	0.388	0.489	0	0	1	0	0	0	C2o=	C2	(b.86.1.1)*2
1aua_1	592	592	53	37	26	50.986	0.841	0.374	0.331	0.517	0.367	0	1	0	0	0	0	C2m=	C2	(a.5.3.1,c.13.1.1)*2
1aue_2	94	94	23	16	12	4.416	0.821	0.620	0.535	0.540	0.593	0	0	1	1	0	0	A1o	A	(a.24.7.1)*1
1ava_1	584	584	43	35	25	37.625	0.717	0.546	0.431	0.552	0.499	0	0	1	0	0	0	A2	A	(b.42.4.1)*1+(c.1.8.1,b.71.1.1)*1
1avq_1	681	681	46	45	26	53.820	0.648	0.295	0.335	0.016	0.317	1	0	0	0	1	0	C3	C3	(c.52.1.13)*3
1avv_1	198	198	35	23	19	15.295	0.833	0.510	0.381	0.538	0.452	0	0	1	0	0	0	C2o=	C2	(d.102.1.1)*2
1avw_1	394	394	41	25	22	22.550	0.872	0.546	0.439	0.585	0.507	0	0	1	0	0	0	A2	A	(b.42.4.1)*1+(b.47.1.2)*1
1avz_1	260	260	35	28	20	19.600	0.729	0.437	0.358	0.463	0.407	0	1	0	0	0	0	A3	A	(b.34.2.1)*1+(d.102.1.1)*2
1b0n_1	134	134	30	18	15	8.100	0.909	0.552	0.437	0.628	0.507	0	0	1	0	0	0	A2	A	(a.34.1.1)*1+(a.35.1.3,a.34.1.1)*1
1b12_1	239	239	43	28	19	22.876	0.915	0.534	0.327	0.635	0.441	0	0	1	0	0	0	A1o	A	(b.87.1.2)*1
1b24_1	173	173	29	21	18	10.962	0.744	0.463	0.398	0.629	0.444	0	1	0	0	0	0	A1m	A	(d.95.2.1,d.95.2.1)*1
1b25_1	2444	2444	82	71	45	261.990	0.707	0.360	0.280	0.079	0.323	1	0	0	0	0	0	D2	D2	(d.152.1.1,a.110.1.1)*4
1b2p_1	476	476	38	33	29	36.366	0.613	0.342	0.322	0.036	0.327	0	1	0	0	0	0	D2	D2	(b.78.1.1)*4
1b33_1	1030	1030	59	58	23	78.706	0.728	0.319	0.323	0.191	0.327	0	1	0	0	1	0	A4+	A	(a.1.1.3)*6+(d.30.1.1)*1
1b4u_1	860	860	48	35	34	57.120	0.696	0.539	0.421	0.534	0.493	0	0	1	0	0	0	C2o≠	C2	(a.88.1.1)*2+(c.56.6.1)*2
1b5s_1	14520	14520	117	116	116	1574.352	0.504	0.003	0.099	0.000	0.053	1	0	0	0	1	0	TOI	I	(c.43.1.1)*60
1b63_1	666	666	46	40	26	47.840	0.697	0.449	0.380	0.478	0.423	0	1	0	0	0	0	C2m=	C2	(d.122.1.2,d.14.1.3)*2
1bcp_1	935	935	59	44	40	103.840	0.702	0.499	0.296	0.521	0.406	1	0	0	0	0	0	A4+	A	(b.40.2.1)*3+(d.166.1.1)*1+(d.169.1.2,b.40.2.1)*2
1bdf_1	917	917	86	41	28	98.728	1.246	0.447	0.282	0.435	0.372	1	0	0	0	0	0	C2m=	C2	(d.74.3.1,d.181.1.1)*4
1bdo_1	160	160	28	21	15	8.820	0.778	0.508	0.430	0.315	0.480	0	0	1	0	0	0	C2o=	C2	(b.84.1.1)*2
1bgf_1	248	248	43	27	26	30.186	0.811	0.506	0.289	0.474	0.401	1	0	0	0	0	0	C2o=	C2	(a.90.1.1)*2
1bgv_1	2694	2694	66	61	60	241.560	0.545	0.530	0.331	0.251	0.429	0	0	1	0	0	0	D3	D3	(c.58.1.1,c.2.1.7)*6
1bgx_1	1247	1247	65	47	42	128.310	0.730	0.372	0.280	0.534	0.337	1	0	0	0	0	0	A3	A	(b.1.1.1,b.1.1.2)*2+(c.120.1.2,a.60.7.1,c.55.3.5,e.8.1.1)*1
1bgy_1	3977	3977	101	76	70	537.320	0.692	0.358	0.234	0.283	0.297	1	0	0	0	0	0	A4+	A	(a.3.1.3,f.23.11.1)*2+(d.184.1.3)*2+(d.185.1.1,d.185.1.1)*4+(f.21.1.2,f.32.1.1)*2+(f.23.12.1)*1+(f.23.12.1,b.33.1.1)*1+(f.23.13.1)*2+(f.23.14.1)*2+(f.23.15.1)*2+(f.27.1.1)*2+(f.28.1.1)*2
1bht_1	350	350	32	31	23	22.816	0.593	0.496	0.408	0.350	0.457	0	1	0	0	0	0	C2m=	C2	(g.10.1.1,g.14.1.1)*2
1bi7_1	788	788	54	35	29	54.810	0.844	0.471	0.395	0.232	0.439	0	1	0	0	0	0	C2o≠	C2	(d.144.1.7)*2+(d.211.1.1)*2
1bih_1	782	782	60	55	36	118.800	0.659	0.306	0.203	0.250	0.256	1	0	0	0	0	0	C2m=	C2	(b.1.1.4,b.1.1.4,b.1.1.4,b.1.1.4)*2
1bik_1	110	110	27	17	12	5.508	0.931	0.593	0.486	0.510	0.553	0	0	1	0	0	0	A1m	A	(g.8.1.1,g.8.1.1)*1
1bkb_1	544	544	55	54	21	62.370	0.733	0.237	0.248	0.001	0.245	1	0	0	0	1	0	C4+	C4	(b.34.5.2,b.40.4.5)*4
1bkr_1	108	108	20	17	14	4.760	0.645	0.627	0.557	0.583	0.604	0	0	1	1	0	0	A1o	A	(a.40.1.1)*1
1ble_1	483	483	43	42	20	36.120	0.694	0.503	0.370	0.402	0.442	0	0	1	0	0	0	C3	C3	(c.38.1.1)*3
1blx_1	465	465	47	33	27	41.877	0.783	0.454	0.320	0.502	0.395	0	1	0	0	0	0	A2	A	(d.144.1.7)*1+(d.211.1.1)*1
1bmt_1	492	492	37	35	31	40.145	0.561	0.348	0.331	0.147	0.349	0	1	0	0	0	0	C2m=	C2	(a.46.1.1,c.23.6.1)*2
1bnd_1	434	434	65	29	26	49.010	1.182	0.473	0.269	0.494	0.368	1	0	0	0	0	0	C2o=	C2	(g.17.1.3)*4
1bow_1	286	286	38	24	19	17.328	0.884	0.574	0.462	0.275	0.525	0	0	1	0	0	0	C2o=	C2	(d.60.1.1)*2
1br1_1	935	935	67	49	36	118.188	0.788	0.424	0.254	0.511	0.348	1	0	0	0	0	0	A2	A	(a.39.1.5)*1+(c.37.1.9,b.34.3.1)*1
1brt_1	831	831	47	46	25	54.050	0.662	0.518	0.418	0.227	0.474	0	0	1	0	0	0	C3	C3	(c.69.1.12)*3
1bsm_1	804	804	41	39	29	46.371	0.603	0.563	0.472	0.360	0.531	0	0	1	0	0	0	D2	D2	(a.2.11.1,d.44.1.1)*4
1btk_1	329	329	47	24	24	27.072	0.979	0.548	0.376	0.530	0.475	0	0	1	0	0	0	C2o=	C2	(b.55.1.1)*2
1bu8_1	446	446	51	27	22	30.294	1.041	0.575	0.416	0.646	0.508	0	0	1	0	0	0	A1m	A	(c.69.1.19,b.12.1.2)*1
1buh_1	357	357	40	29	22	25.520	0.784	0.492	0.393	0.553	0.456	0	1	0	0	0	0	A2	A	(d.144.1.7)*1+(d.97.1.1)*1
1bui_1	617	617	45	38	29	49.590	0.672	0.505	0.359	0.327	0.440	0	0	1	0	0	0	A3	A	(b.47.1.2)*2+(d.15.5.1)*1
1bun_1	181	181	35	25	12	10.500	0.946	0.498	0.411	0.683	0.467	0	1	0	0	0	0	A2	A	(a.133.1.2)*1+(g.8.1.1)*1
1bvn_1	567	567	42	33	25	34.650	0.724	0.577	0.452	0.513	0.526	0	0	1	0	0	0	A2	A	(b.5.1.1)*1+(c.1.8.1,b.71.1.1)*1
1bvy_1	1029	1029	68	41	33	92.004	0.919	0.447	0.332	0.522	0.403	0	1	0	0	0	0	A3	A	(a.104.1.1)*2+(c.23.5.1)*1
1bx7_1	51	51	27	13	10	3.510	1.174	0.552	0.367	0.442	0.467	0	0	1	0	0	0	A1o	A	(g.3.15.1)*1
1bxe_1	110	110	38	16	11	6.688	1.407	0.551	0.424	0.517	0.500	0	0	1	0	0	0	A1o	A	(d.55.1.1)*1
1bxr_1	5808	5808	136	84	62	708.288	0.932	0.230	0.225	0.005	0.225	1	0	0	0	0	0	D2	D2	(c.30.1.1,d.142.1.2,a.92.1.1,c.30.1.1,d.142.1.2,c.24.1.1)*4+(c.8.3.1,c.23.16.1)*4
1byi_1	448	448	44	27	21	24.948	0.917	0.469	0.440	0.489	0.467	0	1	0	0	0	0	C2o=	C2	(c.37.1.10)*2
1byr_1	304	304	33	24	17	13.464	0.805	0.593	0.544	0.573	0.585	0	0	1	1	0	0	C2o=	C2	(d.136.1.1)*2
1bz4_1	144	144	38	15	12	6.840	1.407	0.600	0.505	0.606	0.562	0	0	1	1	0	0	A1o	A	(a.24.1.1)*1
1c0p_1	726	726	47	45	40	84.600	0.553	0.386	0.260	0.368	0.328	1	0	0	0	0	0	C2m=	C2	(c.4.1.2,d.16.1.3)*2
1c1k_1	217	217	37	21	16	12.432	1.000	0.601	0.481	0.541	0.550	0	0	1	0	0	0	A1o	A	(a.120.1.1)*1
1c1y_1	244	244	32	25	21	16.800	0.696	0.524	0.395	0.568	0.470	0	0	1	0	0	0	A2	A	(c.37.1.8)*1+(d.15.1.5)*1
1c3w_1	666	666	36	33	33	39.204	0.545	0.454	0.435	0.124	0.440	0	1	0	0	0	0	C3	C3	(f.13.1.1)*3
1c4z_1	1194	1194	66	52	40	137.280	0.717	0.430	0.279	0.315	0.359	1	0	0	0	0	0	A4+	A	(d.148.1.1)*3+(d.20.1.1)*1
1c5e_1	285	285	28	27	17	12.852	0.636	0.509	0.498	0.490	0.518	0	0	1	0	0	0	C3	C3	(b.85.2.1)*3
1c6v_1	630	630	52	36	27	50.544	0.825	0.437	0.345	0.484	0.401	0	1	0	0	0	0	A4+	A	(b.34.7.1)*1+(c.55.3.2)*4
1c75_1	71	71	14	13	12	2.184	0.560	0.463	0.524	0.222	0.492	0	1	0	0	1	0	A1o	A	(a.3.1.1)*1
1c7k_1	132	132	23	18	13	5.382	0.742	0.587	0.544	0.751	0.582	0	0	1	1	0	0	A1o	A	(d.92.1.1)*1
1c8b_1	1280	1280	61	49	43	128.527	0.663	0.397	0.272	0.185	0.338	1	0	0	0	0	0	D2	D2	(c.56.1.2)*4
1c8u_1	570	570	46	29	27	36.018	0.821	0.561	0.444	0.569	0.521	0	0	1	0	0	0	C2m=	C2	(d.38.1.3,d.38.1.3)*2
1c8z_1	265	265	32	28	25	22.400	0.604	0.556	0.359	0.610	0.469	0	0	1	0	0	0	A1o	A	(d.23.1.1)*1
1c96_1	753	753	46	39	32	57.408	0.648	0.551	0.397	0.543	0.487	0	0	1	0	0	0	A1m	A	(c.83.1.1,c.8.2.1)*1
1cb6_1	691	691	50	38	29	55.100	0.746	0.454	0.348	0.490	0.416	0	1	0	0	0	0	A1m	A	(c.94.1.2,c.94.1.2)*1
1cbu_1	539	539	40	40	29	46.400	0.580	0.476	0.335	0.581	0.419	0	1	0	0	0	0	C3	C3	(c.37.1.11)*3
1cby_1	454	454	37	32	24	28.416	0.661	0.532	0.446	0.361	0.500	0	0	1	0	0	0	C2o=	C2	(d.103.1.1)*2
1cc8_1	72	72	20	12	11	2.640	0.870	0.587	0.568	0.477	0.588	0	0	1	1	0	0	A1o	A	(d.58.17.1)*1
1ccw_1	1240	1240	66	42	36	99.792	0.846	0.476	0.357	0.596	0.429	0	1	0	0	0	0	C2o≠	C2	(c.1.19.2)*2+(c.23.6.1)*2
1cdz_1	96	96	25	15	14	5.250	0.862	0.661	0.500	0.692	0.590	0	0	1	1	0	0	A1o	A	(c.15.1.1)*1
1cfr_1	1132	1132	67	45	45	135.675	0.744	0.420	0.248	0.420	0.339	1	0	0	0	0	0	D2	D2	(c.52.1.7)*4
1cfz_1	162	162	27	23	14	8.694	0.730	0.580	0.470	0.621	0.537	0	0	1	0	0	0	A1o	A	(c.56.1.1)*1
1chd_1	198	198	26	20	19	9.880	0.667	0.578	0.493	0.604	0.553	0	0	1	0	0	0	A1o	A	(c.40.1.1)*1
1chm_1	802	802	44	37	31	50.468	0.647	0.533	0.455	0.483	0.509	0	0	1	0	0	0	C2m=	C2	(c.55.2.1,d.127.1.1)*2
1ci4_1	177	177	30	19	17	9.690	0.833	0.631	0.501	0.588	0.582	0	0	1	1	0	0	C2o=	C2	(a.60.5.1)*2
1cjy_1	633	633	63	32	23	46.368	1.145	0.542	0.380	0.643	0.472	0	0	1	0	0	0	A1m	A	(b.7.1.1,c.19.1.2)*1
1ck7_1	619	619	48	35	32	53.760	0.716	0.437	0.325	0.406	0.386	0	1	0	0	0	0	A1m	A	(a.20.1.2,d.92.1.11,g.14.1.2,g.14.1.2,g.14.1.2,b.66.1.1)*1
1ckm_1	317	317	34	28	23	21.896	0.667	0.405	0.374	0.161	0.392	0	1	0	0	0	0	A1m	A	(d.142.2.3,b.40.4.6)*1
1cks_1	460	460	35	31	30	32.550	0.574	0.409	0.404	0.054	0.409	0	1	0	0	0	0	D3	D3	(d.97.1.1)*6
1cku_1	170	170	30	20	17	10.200	0.811	0.552	0.422	0.593	0.497	0	0	1	0	0	0	C2o=	C2	(g.35.1.1)*2
1clv_1	503	503	40	28	26	29.120	0.741	0.585	0.470	0.587	0.541	0	0	1	0	0	0	A2	A	(c.1.8.1,b.71.1.1)*1+(g.3.2.1)*1
1cmx_1	517	517	47	33	23	35.673	0.839	0.540	0.399	0.617	0.478	0	0	1	0	0	0	A4+	A	(d.15.1.1)*2+(d.3.1.6)*2
1coa_1	768	768	40	40	34	54.400	0.541	0.357	0.374	0.121	0.379	0	1	0	0	1	0	D4+	D6	(d.40.1.1)*12
1col_1	197	197	24	19	18	8.208	0.649	0.578	0.541	0.556	0.574	0	0	1	1	0	0	A1o	A	(f.1.1.1)*1
1cq3_1	448	448	40	33	30	39.600	0.635	0.399	0.298	0.228	0.354	1	0	0	0	0	0	C2o=	C2	(b.27.1.1)*2
1cqx_1	403	403	38	30	25	28.500	0.691	0.436	0.371	0.404	0.411	0	1	0	0	0	0	A1m	A	(a.1.1.2,b.43.4.2,c.25.1.5)*1
1crk_1	3040	3040	84	83	73	508.956	0.538	0.362	0.205	0.152	0.277	1	0	0	0	0	0	D4+	D4	(a.83.1.1,d.128.1.2)*8
1ctf_1	136	136	26	19	16	7.904	0.743	0.492	0.423	0.327	0.476	0	1	0	0	0	0	C2o=	C2	(d.45.1.1)*2
1ctt_1	588	588	47	31	28	40.796	0.797	0.579	0.417	0.472	0.510	0	0	1	0	0	0	C2m=	C2	(c.97.1.1,c.97.1.1)*2
1cu1_1	1290	1290	57	41	37	86.469	0.731	0.379	0.369	0.059	0.378	0	1	0	0	0	0	C2m=	C2	(b.47.1.3,c.37.1.14,c.37.1.14)*2
1cuk_1	760	760	46	46	26	55.016	0.639	0.443	0.361	0.443	0.415	0	1	0	0	0	0	C4+	C4	(b.40.4.2,a.60.2.1,a.5.1.1)*4
1cul_1	707	707	56	40	34	76.160	0.757	0.357	0.275	0.492	0.328	1	0	0	0	0	0	A3	A	(c.37.1.8,a.66.1.1)*1+(d.58.29.1)*2
1cun_1	639	639	73	70	24	122.640	0.777	0.267	0.164	0.099	0.217	1	0	0	0	0	0	C3	C3	(a.7.1.1,a.7.1.1)*3
1cvr_1	432	432	38	27	24	24.624	0.745	0.583	0.467	0.629	0.539	0	0	1	0	0	0	A1m	A	(c.17.1.2,b.1.18.12)*1
1cvs_1	665	665	62	42	30	78.120	0.861	0.354	0.248	0.301	0.307	1	0	0	0	0	0	C2m≠	C2	(b.1.1.4,b.1.1.4)*2+(b.42.1.1)*2
1cwv_1	484	484	111	24	20	53.280	2.523	0.230	0.225	0.128	0.232	1	0	0	0	0	1	A1m	A	(b.1.14.1,b.1.14.1,b.1.14.1,b.1.14.1,d.169.1.3)*1
1cx8_1	1278	1278	60	48	31	89.280	0.759	0.401	0.370	0.400	0.394	0	1	0	0	0	0	C2m=	C2	(c.56.5.5,c.8.4.1,a.48.2.1)*2
1cxz_1	268	268	40	26	19	19.760	0.889	0.519	0.376	0.567	0.457	0	0	1	0	0	0	A2	A	(a.2.6.1)*1+(c.37.1.8)*1
1cy5_1	93	93	19	14	13	3.458	0.704	0.613	0.588	0.624	0.602	0	0	1	1	0	0	A1o	A	(a.77.1.3)*1
1cza_1	898	898	80	35	30	84.000	1.231	0.394	0.307	0.190	0.357	0	1	0	0	0	0	A1m	A	(c.55.1.3,c.55.1.3,c.55.1.3,c.55.1.3)*1
1d01_1	504	504	39	39	23	34.983	0.629	0.411	0.347	0.314	0.385	0	1	0	0	0	0	C3	C3	(h.1.2.1,b.8.1.1)*3
1d09_1	2778	2778	77	76	56	327.712	0.583	0.270	0.242	0.016	0.257	1	0	0	0	0	0	D3	D3	(c.78.1.1,c.78.1.1)*6+(d.58.2.1,g.41.7.1)*6
1d0n_1	1458	1458	99	41	39	158.301	1.238	0.407	0.277	0.465	0.348	1	0	0	0	0	0	C2m=	C2	(d.109.1.1,d.109.1.1,d.109.1.1,d.109.1.1,d.109.1.1,d.109.1.1)*2
1d1b_1	736	736	58	34	30	59.160	0.906	0.501	0.367	0.478	0.444	0	0	1	0	0	0	A1m	A	(c.37.1.9,b.34.3.1)*1
1d2t_1	1332	1332	58	58	40	134.560	0.592	0.437	0.291	0.488	0.365	1	0	0	0	0	0	D3	D3	(a.111.1.1)*6
1d2z_2	261	261	34	27	22	20.196	0.694	0.500	0.363	0.669	0.447	0	0	1	0	0	0	A2	A	(a.77.1.2)*2
1d3y_1	579	579	39	33	31	39.897	0.609	0.397	0.379	0.176	0.395	0	1	0	0	0	0	C2o=	C2	(e.12.1.1)*2
1d4v_1	840	840	55	54	54	160.380	0.509	0.431	0.199	0.607	0.326	1	0	0	0	0	0	C3	C3	(b.22.1.1)*3+(g.24.1.1,g.24.1.1,g.24.1.1)*3
1d5f_1	1050	1050	55	53	39	113.685	0.598	0.475	0.302	0.322	0.392	0	1	0	0	0	0	C3	C3	(d.148.1.1)*3
1d6r_1	562	562	44	25	24	26.400	0.898	0.519	0.428	0.379	0.473	0	0	1	0	0	0	C2o≠	C2	(b.47.1.2)*2+(g.3.13.1)*2
1d8l_1	560	560	41	41	27	45.387	0.603	0.391	0.325	0.468	0.374	0	1	0	0	0	0	C4+	C4	(b.40.4.2,a.60.2.1)*4
1dce_1	896	896	59	39	35	80.535	0.797	0.468	0.337	0.537	0.415	0	1	0	0	0	0	A2	A	(a.102.4.3)*1+(a.118.6.1,b.7.4.1,c.10.2.2)*1
1dci_1	1650	1650	48	47	45	101.520	0.522	0.494	0.442	0.332	0.479	0	1	0	0	0	0	D3	D3	(c.14.1.3)*6
1dcq_1	276	276	34	23	22	17.204	0.756	0.586	0.434	0.632	0.522	0	0	1	0	0	0	A1m	A	(g.45.1.1,d.211.1.1)*1
1dd4_1	331	331	41	26	18	19.188	0.932	0.559	0.438	0.650	0.508	0	0	1	0	0	0	C2m≠	C2	(a.108.1.1)*2+(a.108.1.1,d.45.1.1)*2
1dd9_1	310	310	45	25	20	22.500	1.000	0.483	0.376	0.412	0.440	0	1	0	0	0	0	A1o	A	(e.13.1.1)*1
1ddt_1	1046	1046	51	49	32	79.968	0.630	0.401	0.336	0.457	0.383	0	1	0	0	0	0	C2m=	C2	(d.166.1.1,f.1.2.1,b.2.1.1)*2
1ddz_1	962	962	46	35	33	53.130	0.676	0.583	0.479	0.451	0.544	0	0	1	0	0	0	C2m=	C2	(c.53.2.1,c.53.2.1)*2
1de4_2	2012	2012	100	62	52	322.400	0.877	0.384	0.207	0.479	0.300	1	0	0	0	0	0	C2m≠	C2	(b.1.1.2)*2+(c.56.5.5,c.8.4.1,a.48.2.1)*2+(d.19.1.1,b.1.1.2)*2
1dee_3	491	491	45	34	26	39.780	0.750	0.407	0.322	0.333	0.372	0	1	0	0	0	0	A3	A	(a.8.1.1)*1+(b.1.1.1,b.1.1.2)*2
1dhn_1	968	968	44	36	36	57.024	0.611	0.369	0.421	0.010	0.389	0	1	0	0	1	0	D4+	D4	(d.96.1.3)*8
1div_1	298	298	50	50	23	57.500	0.685	0.227	0.149	0.462	0.200	1	0	0	0	0	0	C2m=	C2	(d.100.1.1,d.99.1.1)*2
1dj0_1	528	528	47	40	23	43.240	0.746	0.516	0.359	0.570	0.449	0	0	1	0	0	0	C2o=	C2	(d.265.1.1)*2
1dj8_1	158	158	26	18	16	7.488	0.765	0.574	0.496	0.619	0.552	0	0	1	0	0	0	C2o=	C2	(a.57.1.1)*2
1djn_1	1458	1458	55	45	36	89.100	0.679	0.523	0.443	0.393	0.492	0	0	1	0	0	0	C2m=	C2	(c.1.4.1,c.4.1.1,c.3.1.1)*2
1djr_1	515	515	37	34	22	27.676	0.661	0.504	0.484	0.178	0.502	0	0	1	0	0	0	C4+	C5	(b.40.2.1)*5
1djx_2	561	561	50	35	27	47.250	0.806	0.446	0.335	0.440	0.401	0	1	0	0	0	0	A1m	A	(a.39.1.7,c.1.18.1,b.7.1.1)*1
1dkg_1	685	685	71	49	33	114.807	0.866	0.303	0.187	0.192	0.245	1	0	0	0	0	0	A3	A	(c.55.1.1,c.55.1.1)*1+(h.1.9.1,b.73.1.1)*2
1dl5_1	633	633	66	27	26	46.332	1.245	0.478	0.381	0.416	0.433	0	1	0	0	0	0	C2m=	C2	(c.66.1.7,d.197.1.1)*2
1dlj_1	804	804	53	44	33	76.956	0.688	0.497	0.320	0.564	0.414	0	1	0	0	0	0	C2m=	C2	(c.2.1.6,a.100.1.4,c.26.3.1)*2
1dm5_1	1890	1890	59	59	46	160.126	0.562	0.402	0.333	0.179	0.371	0	1	0	0	0	0	D3	D3	(a.65.1.1)*6
1dmg_1	172	172	28	21	18	10.584	0.718	0.511	0.407	0.543	0.469	0	0	1	0	0	0	A1o	A	(c.22.1.1)*1
1dov_1	362	362	72	29	16	33.408	1.600	0.279	0.265	0.027	0.270	1	0	0	0	0	0	C2o=	C2	(a.24.9.1)*2
1dpt_2	117	117	27	19	13	6.669	0.844	0.540	0.410	0.611	0.487	0	0	1	0	0	0	A1o	A	(d.80.1.3)*1
1dq3_1	454	454	49	38	23	42.826	0.803	0.483	0.331	0.613	0.421	0	1	0	0	0	0	A1m	A	(b.86.1.2,d.95.2.2,d.95.2.2,d.50.3.1)*1
1dq8_1	1631	1631	73	44	35	112.420	0.924	0.569	0.415	0.557	0.509	0	0	1	0	0	0	D2	D2	(d.179.1.1,d.58.20.1)*4
1dqv_1	275	275	47	22	18	18.612	1.175	0.406	0.357	0.231	0.387	0	1	0	0	0	0	A1m	A	(b.7.1.2,b.7.1.2)*1
1ds1_1	323	323	33	25	22	18.150	0.702	0.566	0.458	0.529	0.525	0	0	1	0	0	0	A1o	A	(b.82.2.2)*1
1dtd_1	364	364	36	25	22	19.800	0.766	0.579	0.470	0.497	0.535	0	0	1	0	0	0	A2	A	(c.56.5.1)*1+(g.30.1.1)*1
1dto_1	400	400	50	38	37	70.300	0.667	0.207	0.171	0.012	0.186	1	0	0	0	0	0	C2o=	C2	(b.91.1.1)*2
1duv_1	999	999	49	48	29	68.208	0.636	0.548	0.394	0.480	0.472	0	0	1	0	0	0	C3	C3	(c.78.1.1,c.78.1.1)*3
1dvf_1	451	451	50	31	20	31.000	0.980	0.573	0.398	0.538	0.487	0	0	1	0	0	0	D2	D2	(b.1.1.1)*4
1dvk_1	299	299	53	23	22	26.818	1.178	0.405	0.318	0.422	0.374	0	1	0	0	0	0	C2o=	C2	(a.72.1.1)*2
1dvo_1	152	152	52	22	13	14.872	1.486	0.406	0.283	0.278	0.350	1	0	0	0	0	0	A1o	A	(a.136.1.1)*1
1dvp_1	434	434	66	28	25	46.200	1.245	0.440	0.301	0.549	0.387	0	1	0	0	0	0	C2m=	C2	(a.118.9.2,g.50.1.1)*2
1dxg_1	72	72	15	13	12	2.340	0.600	0.609	0.592	0.349	0.603	0	0	1	1	0	0	C2o=	C2	(g.41.5.2)*2
1dxy_1	660	660	51	30	28	42.840	0.879	0.531	0.393	0.578	0.468	0	0	1	0	0	0	C2m=	C2	(c.23.12.1,c.2.1.4)*2
1dy5_1	123	123	23	18	15	6.210	0.697	0.560	0.457	0.686	0.520	0	0	1	0	0	0	A1o	A	(d.5.1.1)*1
1e20_1	555	555	40	40	26	41.600	0.606	0.510	0.398	0.433	0.468	0	0	1	0	0	0	C3	C3	(c.34.1.1)*3
1e2v_1	251	251	51	22	16	17.952	1.342	0.539	0.390	0.619	0.477	0	0	1	0	0	0	A1m	A	(b.2.6.1,b.84.2.2)*1
1e32_1	2628	2628	84	83	31	216.132	0.737	0.407	0.318	0.354	0.375	0	1	0	0	0	0	C4+	C6	(b.52.2.3,d.31.1.1,c.37.1.20)*6
1e3h_1	1803	1803	54	53	51	145.962	0.519	0.335	0.322	0.083	0.332	0	1	0	0	0	0	C3	C3	(d.14.1.4,d.101.1.1,a.4.9.1,d.14.1.4,d.101.1.1,d.52.3.1)*3
1e50_2	250	250	34	26	21	18.564	0.723	0.566	0.382	0.625	0.481	0	0	1	0	0	0	A2	A	(b.2.5.6)*1+(b.54.1.1)*1
1e58_1	494	494	48	30	29	41.760	0.814	0.526	0.372	0.509	0.465	0	0	1	0	0	0	C2o=	C2	(c.60.1.1)*2
1e6p_2	498	498	45	33	26	38.610	0.763	0.524	0.368	0.632	0.457	0	0	1	0	0	0	A1m	A	(c.1.8.5,d.26.3.1,b.72.2.1)*1
1e6y_1	2495	2495	72	45	41	132.840	0.837	0.566	0.502	0.513	0.551	0	0	1	1	0	0	C2m≠	C2	(d.58.31.1)*2+(d.58.31.2,a.89.1.1)*4
1e8c_2	497	497	45	32	24	34.560	0.804	0.489	0.382	0.407	0.446	0	1	0	0	0	0	A1m	A	(c.98.1.1,c.72.2.1,c.59.1.1)*1
1e9y_1	9684	9684	82	81	81	538.002	0.506	0.359	0.426	0.013	0.385	0	1	0	0	1	0	TOI	T	(b.92.1.1,c.1.9.2)*12+(d.8.1.1,b.85.3.1)*12
1eai_1	602	602	48	32	25	38.400	0.842	0.352	0.367	0.099	0.365	0	1	0	0	1	0	C2o≠	C2	(b.47.1.2)*2+(g.22.1.1)*2
1ear_1	284	284	48	21	20	20.160	1.171	0.507	0.375	0.554	0.449	0	0	1	0	0	0	C2m=	C2	(b.107.1.1,d.58.38.1)*2
1ebd_1	951	951	58	41	39	92.742	0.725	0.471	0.306	0.529	0.401	0	1	0	0	0	0	A3	A	(a.9.1.1)*1+(c.3.1.5,c.3.1.5,d.87.1.1)*2
1ec8_1	1768	1768	62	54	51	170.748	0.590	0.418	0.299	0.477	0.375	1	0	0	0	0	0	D2	D2	(d.54.1.1,c.1.11.2)*4
1ecf_1	1984	1984	67	48	41	131.856	0.753	0.399	0.390	0.154	0.403	0	1	0	0	0	0	D2	D2	(d.153.1.1,c.61.1.1)*4
1ecj_1	984	984	56	40	35	78.400	0.747	0.480	0.372	0.359	0.435	0	1	0	0	0	0	C2m=	C2	(d.153.1.1,c.61.1.1)*2
1ecz_1	284	284	39	31	20	24.180	0.765	0.400	0.325	0.338	0.375	0	1	0	0	0	0	C2o=	C2	(b.16.1.1)*2
1edq_1	540	540	57	29	25	41.325	1.056	0.538	0.372	0.584	0.467	0	0	1	0	0	0	A1m	A	(b.1.18.2,c.1.8.5,d.26.3.1)*1
1eej_1	432	432	46	30	30	41.400	0.767	0.297	0.269	0.059	0.283	1	0	0	0	0	0	C2m=	C2	(d.17.3.1,c.47.1.9)*2
1eer_1	592	592	54	42	32	72.576	0.730	0.411	0.261	0.364	0.343	1	0	0	0	0	0	A3	A	(a.26.1.2)*1+(b.1.2.1,b.1.2.1)*2
1ef1_1	768	768	78	40	40	124.800	0.975	0.453	0.230	0.457	0.338	1	0	0	0	0	0	C2m≠	C2	(a.137.5.1)*2+(d.15.1.4,a.11.2.1,b.55.1.5)*2
1efu_1	1292	1292	79	45	39	138.645	0.940	0.347	0.258	0.569	0.321	1	0	0	0	0	0	C2m≠	C2	(a.5.2.2,d.43.1.1,d.43.1.1)*2+(c.37.1.8,b.43.3.1,b.44.1.1)*2
1eg3_1	260	260	35	22	22	16.940	0.795	0.577	0.433	0.590	0.517	0	0	1	0	0	0	A1m	A	(b.72.1.1,a.39.1.7,a.39.1.7)*1
1ega_1	585	585	57	41	25	58.425	0.864	0.390	0.290	0.215	0.344	1	0	0	0	0	0	C2m=	C2	(c.37.1.8,d.52.3.1)*2
1egh_1	910	910	41	41	32	53.792	0.562	0.520	0.437	0.248	0.483	0	0	1	0	0	0	D3	D3	(c.24.1.2)*6
1ehd_1	89	89	21	14	13	3.822	0.778	0.621	0.481	0.601	0.558	0	0	1	0	0	0	A1m	A	(g.3.1.1,g.3.1.1)*1
1ei5_1	1036	1036	52	42	33	72.072	0.693	0.443	0.390	0.377	0.427	0	1	0	0	0	0	C2m=	C2	(e.3.1.1,b.61.3.1,b.61.3.1)*2
1eia_1	828	828	43	42	39	70.434	0.531	0.502	0.350	0.448	0.435	0	0	1	0	0	0	D2	D2	(a.73.1.1,a.28.3.1)*4
1eja_1	276	276	34	23	20	15.640	0.791	0.572	0.447	0.736	0.524	0	0	1	0	0	0	A2	A	(b.47.1.2)*1+(g.3.15.1)*1
1ejb_1	840	840	43	41	31	54.653	0.597	0.514	0.424	0.418	0.486	0	0	1	0	0	0	C4+	C5	(c.16.1.1)*5
1eku_1	506	506	40	37	20	29.600	0.702	0.472	0.451	0.116	0.458	0	1	0	0	0	0	C2m=	C2	(a.26.1.3,a.26.1.3)*2
1el6_1	624	624	51	46	45	105.570	0.560	0.328	0.186	0.570	0.270	1	0	0	0	0	0	C3	C3	(d.182.1.1)*3
1em8_2	259	259	46	20	18	16.560	1.211	0.546	0.409	0.665	0.487	0	0	1	0	0	0	A2	A	(c.126.1.1)*1+(c.128.1.1)*1
1ems_1	1644	1644	79	44	37	128.612	0.975	0.545	0.375	0.421	0.463	0	0	1	0	0	0	D2	D2	(d.160.1.1,d.13.1.1)*4
1en7_1	314	314	56	29	20	32.480	1.143	0.397	0.292	0.626	0.357	1	0	0	0	0	0	C2m=	C2	(d.4.1.5,a.140.4.1)*2
1ep3_1	1144	1144	62	41	37	94.054	0.795	0.454	0.338	0.513	0.406	0	1	0	0	0	0	C2m≠	C2	(b.43.4.2,c.25.1.3)*2+(c.1.4.1)*2
1epu_1	546	546	51	44	29	65.076	0.699	0.428	0.270	0.513	0.359	1	0	0	0	0	0	A1o	A	(e.25.1.1)*1
1epw_1	1287	1287	79	54	34	145.044	0.898	0.400	0.286	0.505	0.356	1	0	0	0	0	0	A1m	A	(d.92.1.7,h.4.2.1,b.29.1.6,b.42.4.2)*1
1eq2_2	1518	1518	57	55	39	122.265	0.606	0.228	0.292	0.008	0.255	1	0	0	0	1	0	C4+	C5	(c.2.1.2)*5
1es6_1	260	260	35	23	19	15.295	0.833	0.571	0.455	0.644	0.525	0	0	1	0	0	0	A1m	A	(b.31.1.1,b.31.1.1)*1
1es7_1	377	377	49	28	23	31.556	0.961	0.500	0.340	0.544	0.430	0	0	1	0	0	0	C2o≠	C2	(g.17.1.2)*2+(g.7.1.3)*2
1esj_1	852	852	49	45	25	55.125	0.700	0.484	0.393	0.548	0.451	0	1	0	0	0	0	C3	C3	(c.72.1.2)*3
1esl_1	157	157	34	19	18	11.628	0.919	0.514	0.383	0.564	0.460	0	0	1	0	0	0	A1m	A	(d.169.1.1,g.3.11.1)*1
1eu1_1	767	767	42	36	31	46.872	0.627	0.504	0.428	0.390	0.477	0	0	1	0	0	0	A1m	A	(c.81.1.1,b.52.2.2)*1
1evl_1	802	802	45	42	34	64.260	0.592	0.450	0.359	0.339	0.412	0	1	0	0	0	0	C2m=	C2	(d.104.1.1,c.51.1.1)*2
1ewf_1	456	456	76	27	20	41.040	1.617	0.355	0.306	0.372	0.343	0	1	0	0	0	0	A1m	A	(d.83.1.1,d.83.1.1)*1
1ewr_1	976	976	55	46	34	86.020	0.688	0.259	0.282	0.058	0.272	1	0	0	0	1	0	C2m=	C2	(c.55.6.1,a.113.1.1,c.37.1.12)*2
1ewy_1	401	401	33	29	28	26.796	0.579	0.468	0.388	0.512	0.440	0	1	0	0	0	0	A2	A	(b.43.4.2,c.25.1.1)*1+(d.15.4.1)*1
1ex4_1	416	416	51	43	27	59.211	0.729	0.235	0.188	0.216	0.218	1	0	0	0	0	0	C2m=	C2	(c.55.3.2,b.34.7.1)*2
1exb_1	1668	1668	63	61	44	169.092	0.600	0.446	0.293	0.380	0.372	1	0	0	0	0	0	C4+	C4	(c.1.7.1)*4+(d.42.1.2)*4
1ext_1	318	318	53	31	18	29.574	1.082	0.268	0.257	0.345	0.280	1	0	0	0	0	0	C2m=	C2	(g.24.1.1,g.24.1.1,g.24.1.1)*2
1eyq_1	212	212	27	24	20	12.960	0.614	0.564	0.439	0.573	0.511	0	0	1	0	0	0	A1o	A	(d.36.1.1)*1
1eyv_1	264	264	28	27	19	14.364	0.609	0.554	0.457	0.487	0.518	0	0	1	0	0	0	C2o=	C2	(a.79.1.1)*2
1ez3_1	124	124	41	18	10	7.380	1.464	0.564	0.430	0.600	0.503	0	0	1	0	0	0	A1o	A	(a.47.2.1)*1
1ezv_1	4122	4122	110	87	74	708.180	0.683	0.320	0.196	0.263	0.262	1	0	0	0	0	0	A4+	A	(a.3.1.3,f.23.11.1)*2+(b.1.1.1)*2+(d.185.1.1,d.185.1.1)*4+(f.21.1.2,f.32.1.1)*2+(f.23.12.1,b.33.1.1)*2+(f.23.13.1)*2+(f.23.14.1)*2+(f.27.1.1)*2+(f.28.1.1)*2
1f00_1	282	282	69	17	16	18.768	2.091	0.534	0.393	0.595	0.476	0	0	1	0	0	1	A1m	A	(b.1.14.1,b.1.14.1,d.169.1.3)*1
1f0l_2	522	522	44	32	21	29.568	0.830	0.542	0.447	0.519	0.505	0	0	1	0	0	0	A1m	A	(d.166.1.1,f.1.2.1,b.2.1.1)*1
1f13_1	1441	1441	70	53	39	144.690	0.761	0.500	0.317	0.502	0.414	0	0	1	0	0	0	C2m=	C2	(b.1.18.9,d.3.1.4,b.1.5.1,b.1.5.1)*2
1f1e_1	302	302	32	29	18	16.704	0.681	0.576	0.460	0.509	0.524	0	0	1	0	0	0	C2o=	C2	(a.22.1.2)*2
1f1m_1	324	324	41	24	19	18.696	0.953	0.539	0.443	0.607	0.511	0	0	1	0	0	0	C2o=	C2	(a.24.12.1)*2
1f1o_1	351	351	60	25	22	33.000	1.277	0.136	0.089	0.127	0.116	1	0	0	0	0	0	A1o	A	(a.127.1.1)*1
1f1s_1	814	814	65	33	29	62.205	1.048	0.496	0.381	0.422	0.447	0	1	0	0	0	0	A1m	A	(b.1.18.2,a.102.3.2,b.30.5.2,b.24.1.1)*1
1f1u_1	1286	1286	57	42	41	98.154	0.687	0.550	0.393	0.499	0.479	0	0	1	0	0	0	D2	D2	(d.32.1.3,d.32.1.3)*4
1f1z_1	260	260	38	22	21	17.556	0.884	0.544	0.420	0.618	0.499	0	0	1	0	0	0	A1m	A	(c.52.1.16,a.4.5.27)*1
1f32_1	127	127	33	21	12	8.316	1.000	0.555	0.412	0.568	0.498	0	0	1	0	0	0	A1o	A	(d.62.1.1)*1
1f34_1	464	464	41	27	26	28.782	0.774	0.524	0.428	0.625	0.492	0	0	1	0	0	0	A2	A	(b.50.1.2)*1+(d.62.1.1)*1
1f35_1	162	162	33	24	13	10.296	0.892	0.582	0.425	0.621	0.509	0	0	1	0	0	0	A1o	A	(b.94.1.1)*1
1f39_1	404	404	44	34	22	32.912	0.786	0.493	0.365	0.352	0.440	0	1	0	0	0	0	C2o=	C2	(b.87.1.1)*4
1f3g_1	450	450	32	32	26	26.624	0.552	0.481	0.404	0.498	0.448	0	1	0	0	0	0	C3	C3	(b.84.3.1)*3
1f3v_1	329	329	41	27	24	26.568	0.804	0.515	0.355	0.582	0.442	0	0	1	0	0	0	A2	A	(d.58.22.1)*1+(h.1.2.1,b.8.1.1)*1
1f51_1	601	601	49	38	35	65.170	0.671	0.443	0.296	0.537	0.377	1	0	0	0	0	0	C2o≠	C2	(c.23.1.1)*2+(d.123.1.1)*2
1f5n_1	570	570	87	31	26	70.122	1.526	0.455	0.262	0.495	0.362	1	0	0	0	0	0	A1m	A	(c.37.1.8,a.114.1.1)*1
1f60_1	530	530	42	35	26	38.220	0.689	0.490	0.386	0.441	0.449	0	1	0	0	0	0	A2	A	(c.37.1.8,b.43.3.1,b.44.1.1)*1+(d.58.12.1)*1
1f6m_1	856	856	69	37	32	81.696	1.000	0.458	0.311	0.575	0.396	0	1	0	0	0	0	C2m≠	C2	(c.3.1.5,c.3.1.5)*2+(c.47.1.1)*2
1f80_1	570	570	45	42	29	54.810	0.634	0.439	0.311	0.489	0.393	0	1	0	0	0	0	C3	C3	(a.28.1.1)*3+(d.150.1.2)*3
1f93_1	260	260	36	27	18	17.496	0.800	0.585	0.404	0.607	0.499	0	0	1	0	0	0	C2o≠	C2	(a.34.2.1)*2+(d.74.1.1)*2
1f9n_1	887	887	49	46	39	87.906	0.576	0.412	0.303	0.238	0.368	0	1	0	0	0	0	D3	D3	(a.4.5.3,d.74.2.1)*6
1fbi_1	564	564	62	28	26	45.136	1.148	0.449	0.343	0.504	0.403	0	1	0	0	0	0	A3	A	(b.1.1.1,b.1.1.2)*2+(d.2.1.2)*1
1fbl_1	734	734	50	43	38	81.700	0.617	0.402	0.271	0.308	0.342	1	0	0	0	0	0	C2m=	C2	(d.92.1.11,b.66.1.1)*2
1fc6_1	386	386	43	28	20	24.080	0.896	0.485	0.401	0.387	0.452	0	1	0	0	0	0	A1m	A	(c.14.1.2,b.36.1.3)*1
1fcd_1	575	575	44	33	26	37.752	0.746	0.526	0.395	0.516	0.468	0	0	1	0	0	0	A2	A	(a.3.1.4,a.3.1.4)*1+(c.3.1.5,c.3.1.5,d.87.1.1)*1
1fcy_1	236	236	31	24	16	11.904	0.775	0.540	0.491	0.577	0.535	0	0	1	0	0	0	A1o	A	(a.123.1.1)*1
1few_1	346	346	66	24	24	38.016	1.375	0.327	0.255	0.049	0.285	1	0	0	0	0	0	C2o=	C2	(a.7.4.1)*2
1fg9_1	862	862	83	49	45	183.015	0.883	0.294	0.161	0.426	0.233	1	0	0	0	0	0	A4+	A	(a.26.1.3)*2+(b.1.2.1,b.1.2.1)*3
1fgj_1	1497	1497	56	51	50	142.800	0.554	0.449	0.328	0.374	0.405	0	1	0	0	0	0	C3	C3	(a.138.1.3)*3
1fi2_1	1206	1206	47	46	29	62.698	0.627	0.550	0.483	0.375	0.530	0	0	1	0	0	0	D3	D3	(b.82.1.2)*6
1fjr_2	188	188	33	22	20	14.520	0.786	0.562	0.392	0.609	0.492	0	0	1	0	0	0	A1o	A	(b.102.1.1)*1
1fkm_1	322	322	37	30	20	22.200	0.740	0.595	0.431	0.577	0.522	0	0	1	0	0	0	A1m	A	(a.69.2.1,a.69.2.1)*1
1fle_1	287	287	34	24	21	17.136	0.756	0.584	0.433	0.661	0.519	0	0	1	0	0	0	A2	A	(b.47.1.2)*1+(g.3.14.1)*1
1flt_1	382	382	52	30	24	37.440	0.963	0.337	0.288	0.322	0.327	1	0	0	0	0	0	C2o≠	C2	(b.1.1.4)*2+(g.17.1.1)*2
1fn9_1	730	730	57	35	23	45.885	0.983	0.477	0.429	0.107	0.457	0	1	0	0	0	0	C2o=	C2	(d.196.1.1)*2
1fnf_1	368	368	92	22	21	42.504	2.140	0.348	0.244	0.260	0.305	1	0	0	0	0	1	A1m	A	(b.1.2.1,b.1.2.1,b.1.2.1,b.1.2.1)*1
1fno_1	816	816	73	32	27	63.072	1.237	0.288	0.319	0.164	0.308	1	0	0	0	1	0	C2m=	C2	(c.56.5.4,d.58.19.1)*2
1fnu_1	884	884	55	46	32	80.960	0.705	0.465	0.340	0.310	0.409	0	1	0	0	0	0	D2	D2	(b.40.2.2,d.15.6.1)*4
1fo1_1	378	378	54	34	30	55.080	0.844	0.406	0.231	0.516	0.326	1	0	0	0	0	0	A2	A	(c.10.2.3)*1+(d.58.7.2,c.10.2.3)*1
1fp2_1	690	690	53	37	26	50.986	0.841	0.536	0.397	0.646	0.475	0	0	1	0	0	0	C2m=	C2	(a.4.5.29,c.66.1.12)*2
1fp3_1	804	804	57	32	29	52.896	0.934	0.544	0.439	0.434	0.502	0	0	1	0	0	0	C2o=	C2	(a.102.1.3)*2
1fpo_1	171	171	36	28	18	18.144	0.783	0.280	0.246	0.198	0.267	1	0	0	0	0	0	A1m	A	(a.2.3.1,a.23.1.1)*1
1fq1_1	479	479	48	32	23	35.328	0.873	0.448	0.372	0.433	0.417	0	1	0	0	0	0	A2	A	(c.45.1.1)*1+(d.144.1.7)*1
1fqj_2	456	456	50	34	25	42.500	0.847	0.455	0.324	0.473	0.397	0	1	0	0	0	0	A2	A	(a.91.1.1)*1+(c.37.1.8,a.66.1.1)*1
1fqv_1	462	462	53	34	24	43.248	0.914	0.331	0.285	0.400	0.315	1	0	0	0	0	0	A2	A	(a.158.1.1,c.10.1.3)*1+(d.42.1.1,a.157.1.1)*1
1fr3_1	402	402	28	27	26	19.656	0.528	0.570	0.511	0.473	0.553	0	0	1	1	0	0	D3	D3	(b.40.6.1)*6
1fr9_1	1480	1480	52	52	49	132.496	0.515	0.468	0.345	0.056	0.407	0	1	0	0	0	0	D4+	D4	(c.68.1.8)*8
1fs0_1	347	347	38	32	23	27.968	0.691	0.490	0.340	0.641	0.422	0	1	0	0	0	0	A2	A	(b.93.1.1,a.2.10.1)*1+(c.49.2.1)*1
1fs1_1	316	316	49	25	22	26.950	1.043	0.526	0.350	0.434	0.441	0	0	1	0	0	0	C2m≠	C2	(a.158.1.1)*2+(d.42.1.1,a.157.1.1)*2
1fs2_1	774	774	74	33	26	63.492	1.254	0.393	0.312	0.247	0.352	0	1	0	0	0	0	C2m≠	C2	(a.158.1.1,c.10.1.3)*2+(d.42.1.1,a.157.1.1)*2
1fs5_1	1596	1596	53	49	49	127.253	0.541	0.478	0.353	0.164	0.417	0	1	0	0	0	0	D3	D3	(c.124.1.1)*6
1fsg_1	932	932	46	36	33	54.648	0.667	0.523	0.464	0.134	0.492	0	0	1	0	0	0	D2	D2	(c.61.1.1)*4
1fsk_1	593	593	64	28	26	46.592	1.185	0.464	0.357	0.603	0.428	0	1	0	0	0	0	A3	A	(b.1.1.1,b.1.1.2)*2+(d.129.3.1)*1
1ftr_1	1184	1184	51	42	34	72.828	0.671	0.525	0.426	0.157	0.471	0	0	1	0	0	0	D2	D2	(d.58.33.1,d.58.33.1)*4
1fui_1	1773	1773	63	63	38	150.822	0.624	0.477	0.339	0.491	0.416	0	1	0	0	0	0	C3	C3	(c.85.1.1,b.43.2.1)*3
1fvf_1	1086	1086	62	48	38	113.088	0.721	0.272	0.254	0.252	0.270	1	0	0	0	0	0	C2o=	C2	(e.25.1.1)*2
1fvu_1	508	508	44	44	31	60.016	0.587	0.472	0.287	0.386	0.386	1	0	0	0	0	0	C2o=	C2	(d.169.1.1)*4
1fwx_1	1180	1180	58	41	37	87.986	0.744	0.583	0.420	0.520	0.518	0	0	1	0	0	0	C2m=	C2	(b.69.3.1,b.6.1.4)*2
1fx0_1	2832	2832	63	63	56	222.264	0.529	0.421	0.362	0.115	0.399	0	1	0	0	0	0	C3	C3	(b.49.1.1,c.37.1.11,a.69.1.1)*6
1fx7_1	450	450	51	31	27	42.687	0.879	0.480	0.319	0.624	0.410	0	1	0	0	0	0	C2m=	C2	(a.4.5.24,a.76.1.1,b.34.1.2)*2
1fxk_1	698	698	62	51	38	120.156	0.697	0.089	0.143	0.006	0.122	1	0	0	0	1	0	C2o=	C2	(a.2.5.1)*6
1fxo_2	1171	1171	48	47	43	97.008	0.533	0.477	0.354	0.523	0.426	0	1	0	0	0	0	D2	D2	(c.68.1.6)*4
1fyh_1	443	443	52	46	25	59.800	0.732	0.420	0.244	0.565	0.340	1	0	0	0	0	0	A2	A	(a.26.1.3,a.26.1.3)*1+(b.1.2.1,b.1.2.1)*1
1fz1_1	2131	2131	72	51	37	135.864	0.818	0.507	0.434	0.523	0.481	0	0	1	0	0	0	C2o≠	C2	(a.23.3.1)*2+(a.25.1.2)*4
1g29_1	744	744	67	34	30	68.340	1.047	0.439	0.313	0.417	0.382	0	1	0	0	0	0	C2m=	C2	(c.37.1.12,b.40.6.3,b.40.6.3)*2
1g2i_1	996	996	46	45	35	72.450	0.575	0.332	0.354	0.068	0.351	0	1	0	0	1	0	D3	D3	(c.23.16.2)*6
1g2r_1	94	94	23	19	14	6.118	0.697	0.543	0.416	0.709	0.495	0	0	1	0	0	0	A1o	A	(d.192.1.1)*1
1g2y_1	60	60	19	13	11	2.717	0.792	0.565	0.459	0.520	0.528	0	0	1	0	0	0	C2o=	C2	(a.34.2.1)*2
1g2z_1	126	126	23	22	13	6.578	0.657	0.611	0.466	0.429	0.545	0	0	1	0	0	0	D2	D2	(a.34.2.1)*4
1g3n_1	681	681	47	40	34	63.920	0.635	0.409	0.300	0.435	0.365	0	1	0	0	0	0	A3	A	(a.74.1.1,a.74.1.1)*1+(d.144.1.7)*1+(d.211.1.1)*1
1g3p_1	192	192	34	26	22	19.448	0.708	0.412	0.281	0.567	0.360	1	0	0	0	0	0	A1m	A	(b.37.1.1,b.37.1.1)*1
1g3t_1	353	353	43	34	24	35.088	0.741	0.351	0.274	0.244	0.317	1	0	0	0	0	0	C2m≠	C2	(a.4.5.24,a.76.1.1)*1+(a.4.5.24,a.76.1.1,b.34.1.2)*1
1g4a_1	4212	4212	86	66	65	368.940	0.656	0.358	0.317	0.164	0.348	0	1	0	0	0	0	C4+	C6	(c.37.1.20)*6+(d.153.1.4)*12
1g4u_1	540	540	59	31	26	47.554	1.035	0.407	0.325	0.462	0.379	0	1	0	0	0	0	A2	A	(a.24.11.1,c.45.1.2)*1+(c.37.1.8)*1
1g4w_1	341	341	43	26	21	23.478	0.915	0.559	0.414	0.637	0.499	0	0	1	0	0	0	A1m	A	(a.24.11.1,c.45.1.2)*1
1g5y_1	912	912	48	42	30	60.480	0.667	0.403	0.394	0.294	0.415	0	1	0	0	0	0	D2	D2	(a.123.1.1)*4
1g6s_1	427	427	36	24	23	19.872	0.766	0.593	0.516	0.356	0.556	0	0	1	1	0	0	A1o	A	(d.68.2.2)*1
1g6x_1	58	58	19	13	11	2.717	0.792	0.652	0.516	0.661	0.595	0	0	1	1	0	0	A1o	A	(g.8.1.1)*1
1g73_2	259	259	64	32	16	32.768	1.333	0.354	0.230	0.432	0.297	1	0	0	0	0	0	A2	A	(a.7.4.1)*1+(g.52.1.1)*1
1g7s_1	576	576	66	37	27	65.934	1.031	0.304	0.231	0.349	0.274	1	0	0	0	0	0	A1m	A	(c.37.1.8,b.43.3.1,c.20.1.1,b.43.3.1)*1
1g87_2	613	613	61	29	25	44.225	1.130	0.565	0.403	0.538	0.498	0	0	1	0	0	0	A1m	A	(a.102.1.2,b.2.2.2)*1
1g8f_1	3060	3060	76	76	49	283.024	0.608	0.395	0.306	0.039	0.343	0	1	0	0	0	0	D3	D3	(b.122.1.3,c.26.1.5,c.37.1.15)*6
1g8m_1	1180	1180	64	40	36	92.160	0.842	0.494	0.363	0.421	0.437	0	1	0	0	0	0	C2m=	C2	(c.24.1.3,c.97.1.4)*2
1g8q_1	176	176	30	20	19	11.400	0.769	0.589	0.422	0.440	0.510	0	0	1	0	0	0	C2o=	C2	(a.135.1.1)*2
1g8t_1	482	482	56	22	21	25.872	1.302	0.599	0.488	0.568	0.558	0	0	1	0	0	0	C2o=	C2	(d.4.1.2)*2
1gci_1	269	269	24	23	21	11.592	0.545	0.610	0.526	0.627	0.586	0	0	1	1	0	0	A1o	A	(c.41.1.1)*1
1gcq_1	182	182	36	20	15	10.800	1.029	0.564	0.436	0.696	0.511	0	0	1	0	0	0	A3	A	(b.34.2.1)*3
1gd8_1	105	105	25	17	13	5.525	0.833	0.594	0.483	0.594	0.548	0	0	1	0	0	0	A1o	A	(d.188.1.1)*1
1gdr_1	105	105	19	16	13	3.952	0.655	0.168	0.156	0.036	0.161	1	0	0	0	0	0	A1o	A	(c.53.1.1)*1
1gh6_1	440	440	58	33	23	44.022	1.036	0.504	0.310	0.656	0.414	0	0	1	0	0	0	A2	A	(a.2.3.1)*1+(a.74.1.3,a.74.1.3)*1
1gkm_1	2028	2028	61	48	47	137.616	0.642	0.568	0.415	0.542	0.503	0	0	1	0	0	0	D2	D2	(a.127.1.2)*4
1gkp_1	1832	1832	64	45	44	126.720	0.719	0.471	0.394	0.266	0.440	0	1	0	0	0	0	D2	D2	(b.92.1.3,c.1.9.6)*4
1gku_1	1011	1011	66	51	33	111.078	0.786	0.389	0.275	0.504	0.342	1	0	0	0	0	0	A1m	A	(c.37.1.16,c.37.1.16,e.10.1.1)*1
1gl1_1	273	273	29	23	21	14.007	0.659	0.583	0.484	0.643	0.552	0	0	1	0	0	0	A2	A	(b.47.1.2)*1+(g.4.1.1)*1
1gl4_1	362	362	39	33	22	28.314	0.709	0.534	0.360	0.539	0.454	0	0	1	0	0	0	A2	A	(b.1.1.4)*1+(g.3.11.5,d.22.1.2)*1
1glb_1	2608	2608	68	62	50	210.800	0.607	0.356	0.328	0.353	0.357	0	1	0	0	0	0	D2	D2	(b.84.3.1)*4+(c.55.1.4,c.55.1.4)*4
1gme_2	1560	1560	53	52	45	124.020	0.546	0.261	0.315	0.052	0.299	1	0	0	0	1	0	D3	D3	(b.15.1.1)*12
1gmu_3	140	140	30	17	15	7.650	0.938	0.564	0.436	0.633	0.508	0	0	1	0	0	0	A1m	A	(b.107.1.1,d.58.38.1)*1
1gmx_1	108	108	20	17	14	4.760	0.645	0.602	0.532	0.712	0.580	0	0	1	1	0	0	A1o	A	(c.46.1.3)*1
1gnt_1	553	553	45	33	26	38.610	0.763	0.570	0.408	0.609	0.500	0	0	1	0	0	0	A1o	A	(e.26.1.1)*1
1go3_1	284	284	47	28	18	23.688	1.022	0.560	0.367	0.611	0.474	0	0	1	0	0	0	A2	A	(a.60.8.2)*1+(d.230.1.1,b.40.4.5)*1
1go8_1	920	920	68	31	27	56.916	1.172	0.469	0.405	0.273	0.444	0	1	0	0	0	0	C2m=	C2	(d.92.1.6,b.80.7.1)*2
1goi_1	994	994	68	38	31	80.104	0.986	0.430	0.344	0.564	0.402	0	1	0	0	0	0	C2m=	C2	(c.1.8.5,d.26.3.1,b.72.2.1)*2
1got_1	735	735	52	38	30	59.280	0.765	0.418	0.342	0.525	0.391	0	1	0	0	0	0	A3	A	(a.137.3.1)*1+(b.69.4.1)*1+(c.37.1.8,a.66.1.1)*1
1gp0_1	133	133	27	19	15	7.695	0.794	0.601	0.449	0.609	0.538	0	0	1	0	0	0	A1o	A	(b.64.1.1)*1
1gpj_1	798	798	98	61	26	155.428	1.126	0.267	0.159	0.218	0.220	1	0	0	0	0	0	C2m=	C2	(d.58.39.1,c.2.1.7,a.151.1.1)*2
1gpm_1	2000	2000	72	60	47	203.040	0.673	0.313	0.278	0.142	0.303	1	0	0	0	0	0	D2	D2	(c.23.16.1,c.26.2.1,d.52.2.1)*4
1gpq_1	510	510	46	31	20	28.520	0.902	0.558	0.461	0.594	0.516	0	0	1	0	0	0	C2o≠	C2	(d.2.1.2)*2+(d.233.1.1)*2
1gqe_1	362	362	45	34	31	47.430	0.692	0.408	0.242	0.601	0.336	1	0	0	0	0	0	A1o	A	(e.38.1.1)*1
1gqi_1	1416	1416	58	52	43	129.688	0.611	0.479	0.326	0.445	0.405	0	1	0	0	0	0	C2m=	C2	(d.92.2.2,c.1.8.10)*2
1gqm_1	523	523	32	31	29	28.768	0.533	0.365	0.418	0.003	0.377	0	1	0	0	1	0	D3	D3	(a.39.1.2)*6
1gqy_1	937	937	64	34	31	67.456	0.985	0.428	0.363	0.380	0.410	0	1	0	0	0	0	C2m=	C2	(c.5.1.1,c.72.2.1,c.59.1.1)*2
1gri_1	422	422	40	37	25	37.000	0.645	0.487	0.353	0.378	0.433	0	1	0	0	0	0	C2m=	C2	(b.34.2.1,d.93.1.1,b.34.2.1)*2
1gsa_1	1256	1256	51	45	42	96.390	0.586	0.376	0.359	0.073	0.372	0	1	0	0	0	0	D2	D2	(c.30.1.3,d.142.1.1)*4
1gt9_1	714	714	52	31	28	45.136	0.881	0.530	0.406	0.501	0.480	0	0	1	0	0	0	A2	A	(c.41.1.2)*2
1gte_2	2024	2024	62	60	39	145.080	0.626	0.502	0.392	0.386	0.455	0	0	1	0	0	0	C2m=	C2	(a.1.2.2,c.4.1.1,c.3.1.1,c.1.4.1,d.58.1.5)*2
1gtt_1	421	421	34	29	24	23.664	0.642	0.557	0.457	0.446	0.516	0	0	1	0	0	0	A1m	A	(d.177.1.1,d.177.1.1)*1
1gup_1	691	691	40	34	31	42.160	0.615	0.541	0.451	0.315	0.504	0	0	1	0	0	0	C2m=	C2	(d.13.1.2,d.13.1.2)*2
1gvh_1	4752	4752	97	96	46	428.352	0.683	0.282	0.286	0.019	0.281	1	0	0	0	1	0	D4+	D6	(a.1.1.2,b.43.4.2,c.25.1.5)*12
1gvn_1	718	718	56	37	34	70.448	0.789	0.419	0.305	0.541	0.377	0	1	0	0	0	0	C2o≠	C2	(a.8.2.1)*2+(c.37.1.21)*2
1gwe_1	1992	1992	54	53	41	117.342	0.574	0.535	0.459	0.393	0.511	0	0	1	0	0	0	D2	D2	(e.5.1.1)*4
1gxd_1	816	816	69	39	35	94.185	0.932	0.351	0.243	0.577	0.306	1	0	0	0	0	0	A2	A	(a.20.1.2,d.92.1.11,g.14.1.2,g.14.1.2,g.14.1.2,b.66.1.1)*1+(b.40.3.1)*1
1gxl_1	410	410	49	36	28	49.392	0.766	0.375	0.259	0.127	0.316	1	0	0	0	0	0	C2o=	C2	(d.215.1.1)*2
1gyo_1	212	212	41	23	19	17.917	0.976	0.396	0.316	0.425	0.364	0	1	0	0	0	0	C2o=	C2	(a.138.1.1)*2
1gyx_1	152	152	27	20	19	10.260	0.692	0.581	0.425	0.634	0.514	0	0	1	0	0	0	C2o=	C2	(d.80.1.1)*2
1gz0_1	495	495	49	37	29	52.577	0.742	0.327	0.247	0.565	0.295	1	0	0	0	0	0	C2m=	C2	(d.79.3.3,c.116.1.1)*2
1gz0_2	410	410	37	34	21	26.418	0.673	0.444	0.382	0.576	0.426	0	1	0	0	0	0	A2	A	(c.116.1.1)*1+(d.79.3.3,c.116.1.1)*1
1gz4_1	2204	2204	84	79	45	298.620	0.677	0.471	0.255	0.271	0.353	1	0	0	0	0	0	D2	D2	(c.58.1.3,c.2.1.7)*4
1gz5_1	1822	1822	62	53	45	147.870	0.633	0.405	0.339	0.149	0.373	0	1	0	0	0	0	D2	D2	(c.87.1.6)*4
1gzh_1	412	412	49	32	23	36.064	0.891	0.483	0.339	0.453	0.420	0	1	0	0	0	0	A2	A	(b.2.5.2)*1+(c.15.1.4,c.15.1.4)*1
1gzs_1	343	343	33	32	27	28.512	0.559	0.487	0.351	0.435	0.431	0	1	0	0	0	0	A2	A	(a.168.1.1)*1+(c.37.1.8)*1
1h03_1	125	125	50	13	10	6.500	2.174	0.606	0.468	0.702	0.550	0	0	1	0	0	1	A1m	A	(g.18.1.1,g.18.1.1)*1
1h09_1	338	338	41	33	24	32.472	0.719	0.446	0.310	0.570	0.389	0	1	0	0	0	0	A1m	A	(c.1.8.8,b.109.1.1)*1
1h0d_1	562	562	66	31	24	49.104	1.200	0.456	0.328	0.509	0.404	0	1	0	0	0	0	A3	A	(b.1.1.1,b.1.1.2)*2+(d.5.1.1)*1
1h0h_1	1191	1191	54	41	40	88.560	0.667	0.561	0.406	0.587	0.494	0	0	1	0	0	0	A2	A	(c.81.1.1,b.52.2.2)*1+(d.58.1.5)*1
1h16_1	1518	1518	69	50	36	124.200	0.802	0.493	0.355	0.506	0.432	0	1	0	0	0	0	C2o=	C2	(c.7.1.1)*2
1h1v_1	695	695	57	38	30	64.980	0.838	0.397	0.312	0.239	0.366	0	1	0	0	0	0	A2	A	(c.55.1.1,c.55.1.1)*1+(d.109.1.1,d.109.1.1,d.109.1.1)*1
1h2i_1	2046	2046	59	59	36	125.316	0.621	0.337	0.378	0.003	0.349	0	1	0	0	1	0	C4+	C11	(d.50.1.3)*11
1h2s_1	570	570	45	37	29	48.285	0.682	0.392	0.314	0.426	0.367	0	1	0	0	0	0	C2o≠	C2	(f.13.1.1)*2+(f.17.4.1)*2
1h2t_1	850	850	53	42	31	69.006	0.726	0.474	0.360	0.400	0.424	0	1	0	0	0	0	A2	A	(a.118.1.14,a.118.1.14,a.118.1.14)*1+(d.58.7.1)*1
1h2w_1	710	710	42	36	30	45.360	0.636	0.438	0.429	0.110	0.440	0	1	0	0	0	0	A1m	A	(b.69.7.1,c.69.1.4)*1
1h32_1	396	396	47	26	22	26.884	0.979	0.526	0.400	0.458	0.466	0	0	1	0	0	0	A2	A	(a.3.1.1)*1+(a.3.1.8,a.3.1.8)*1
1h3i_1	293	293	45	26	20	23.400	0.978	0.474	0.350	0.613	0.427	0	1	0	0	0	0	A1m	A	(b.76.2.1,b.85.7.1)*1
1h3l_2	78	78	24	12	11	3.168	1.043	0.591	0.543	0.371	0.577	0	0	1	1	0	0	A1o	A	(a.177.1.1)*1
1h4u_1	245	245	34	23	18	14.076	0.829	0.580	0.468	0.619	0.535	0	0	1	0	0	0	A1m	A	(g.3.11.5,d.22.1.2)*1
1h4x_1	111	111	19	17	15	4.845	0.594	0.613	0.533	0.743	0.581	0	0	1	1	0	0	A1o	A	(c.13.2.1)*1
1h54_1	1507	1507	69	51	47	165.393	0.704	0.389	0.282	0.363	0.344	1	0	0	0	0	0	C2m=	C2	(b.30.5.3,a.102.1.4)*2
1h59_1	297	297	32	32	22	22.528	0.593	0.493	0.358	0.279	0.432	0	1	0	0	0	0	C3	C3	(g.1.1.1)*3+(g.3.9.1)*3
1h64_1	497	497	35	35	22	26.950	0.614	0.395	0.428	0.091	0.415	0	1	0	0	1	0	C4+	C7	(b.38.1.1)*7
1h6g_1	255	255	50	28	15	21.000	1.163	0.373	0.304	0.225	0.342	0	1	0	0	0	0	A1m	A	(a.24.9.1,a.24.9.1)*1
1h6u_1	616	616	60	42	40	100.800	0.732	0.364	0.197	0.399	0.287	1	0	0	0	0	0	C2m=	C2	(c.10.2.1,b.1.18.15)*2
1h72_1	592	592	53	32	21	35.616	1.000	0.588	0.439	0.636	0.524	0	0	1	0	0	0	C2m=	C2	(d.14.1.5,d.58.26.1)*2
1h7c_1	103	103	42	12	10	5.040	1.909	0.580	0.490	0.539	0.544	0	0	1	0	0	0	A1o	A	(a.7.5.1)*1
1h8g_1	378	378	44	34	19	28.424	0.830	0.256	0.327	0.011	0.293	1	0	0	0	1	0	D2	D2	(b.109.1.1)*4
1h99_1	440	440	37	31	23	26.381	0.685	0.542	0.452	0.508	0.508	0	0	1	0	0	0	C2m=	C2	(a.142.1.1,a.142.1.1)*2
1h9j_1	435	435	29	28	26	21.112	0.537	0.535	0.465	0.407	0.511	0	0	1	0	0	0	C3	C3	(b.40.6.2,b.40.6.2)*3
1h9s_1	275	275	28	26	21	15.288	0.596	0.545	0.441	0.674	0.505	0	0	1	0	0	0	C2m=	C2	(b.40.6.2,b.40.6.2)*2
1hc7_1	928	928	56	44	39	96.096	0.675	0.417	0.296	0.356	0.367	1	0	0	0	0	0	C2m=	C2	(d.104.1.1,c.51.1.1,d.68.5.1)*2
1hci_1	950	950	187	29	27	146.421	3.339	0.211	0.194	0.066	0.207	1	0	0	0	0	1	C2m=	C2	(a.7.1.1,a.7.1.1,a.7.1.1,a.7.1.1)*2
1hcx_1	254	254	45	36	17	27.540	0.849	0.241	0.249	0.054	0.249	1	0	0	0	1	0	C2o=	C2	(b.109.1.1)*2
1hdh_1	525	525	35	32	26	29.120	0.603	0.573	0.475	0.604	0.538	0	0	1	0	0	0	A1o	A	(c.76.1.2)*1
1hf2_1	402	402	42	30	25	31.500	0.764	0.418	0.336	0.277	0.385	0	1	0	0	0	0	C2m=	C2	(c.102.1.1,b.80.3.1)*2
1hfe_1	485	485	34	31	27	28.458	0.586	0.600	0.473	0.424	0.552	0	0	1	0	0	0	A2	A	(a.137.4.1)*1+(d.58.1.5,c.96.1.1)*1
1hg4_2	720	720	56	55	25	77.000	0.700	0.419	0.291	0.353	0.365	1	0	0	0	0	0	C3	C3	(a.123.1.1)*3
1hh2_1	688	688	81	42	34	115.668	1.066	0.199	0.166	0.217	0.189	1	0	0	0	0	0	C2m=	C2	(d.202.1.1,b.40.4.5,d.52.3.1,d.52.3.1)*2
1hi9_1	2740	2740	60	58	57	198.360	0.522	0.338	0.369	0.009	0.356	0	1	0	0	1	0	D4+	D5	(c.99.1.1)*10
1hiw_1	338	338	39	35	30	40.950	0.600	0.380	0.236	0.212	0.308	1	0	0	0	0	0	C3	C3	(a.61.1.1)*3
1hn0_1	971	971	67	39	36	94.068	0.893	0.447	0.318	0.478	0.391	0	1	0	0	0	0	A1m	A	(b.18.1.17,a.102.3.2,b.30.5.2,b.24.1.1)*1
1hp1_1	516	516	49	27	26	34.398	0.925	0.543	0.418	0.519	0.492	0	0	1	0	0	0	A1m	A	(d.159.1.2,d.114.1.1)*1
1hqk_1	9240	9240	79	78	78	480.636	0.506	0.066	0.352	0.000	0.226	1	0	0	0	1	0	TOI	I	(c.16.1.1)*60
1hr6_3	898	898	48	38	33	60.192	0.676	0.299	0.366	0.009	0.335	1	0	0	0	1	0	C2m=	C2	(d.185.1.1,d.185.1.1)*2
1hsj_1	974	974	48	46	35	77.280	0.593	0.403	0.347	0.235	0.380	0	1	0	0	0	0	C2m=	C2	(c.94.1.1,a.4.5.28)*2
1ht2_2	1044	1044	55	54	29	86.130	0.663	0.265	0.308	0.008	0.289	1	0	0	0	1	0	C4+	C6	(d.153.1.4)*6
1ht8_1	1102	1102	55	38	37	77.330	0.733	0.519	0.405	0.412	0.468	0	0	1	0	0	0	C2m=	C2	(g.3.11.1,a.93.1.2)*2
1hto_1	5724	5724	80	79	70	442.400	0.537	0.351	0.342	0.046	0.347	0	1	0	0	0	0	D4+	D6	(d.15.9.1,d.128.1.1)*12
1hty_1	1014	1014	59	37	31	67.673	0.868	0.574	0.439	0.617	0.519	0	0	1	0	0	0	A1m	A	(c.6.2.1,a.8.3.1,b.30.5.6)*1
1huu_2	74	74	25	20	11	5.500	0.806	0.353	0.292	0.381	0.327	1	0	0	0	0	0	A1o	A	(a.55.1.1)*1
1hw1_1	452	452	36	34	27	33.048	0.590	0.503	0.377	0.415	0.440	0	0	1	0	0	0	C2m=	C2	(a.4.5.6,a.78.1.1)*2
1hw7_1	458	458	45	31	26	36.270	0.789	0.542	0.377	0.442	0.466	0	0	1	0	0	0	C2o=	C2	(d.193.1.1)*2
1hxd_1	305	305	43	24	19	19.608	1.000	0.528	0.407	0.607	0.478	0	0	1	0	0	0	A1m	A	(a.4.5.1,d.104.1.2,b.34.1.1)*1
1hy5_2	121	121	27	13	12	4.212	1.080	0.587	0.564	0.495	0.587	0	0	1	1	0	0	A1o	A	(a.24.11.1)*1
1hyo_1	835	835	51	42	30	64.260	0.708	0.509	0.380	0.474	0.456	0	0	1	0	0	0	C2m=	C2	(b.34.8.1,d.177.1.1)*2
1hyr_1	527	527	62	36	26	58.032	1.000	0.409	0.282	0.477	0.357	1	0	0	0	0	0	A3	A	(d.169.1.1)*2+(d.19.1.1,b.1.1.2)*1
1hyu_1	1042	1042	68	35	29	69.020	1.062	0.425	0.381	0.515	0.424	0	1	0	0	0	0	C2m=	C2	(c.47.1.2,c.47.1.2,c.3.1.5,c.3.1.5)*2
1hz4_1	732	732	54	54	34	99.144	0.614	0.292	0.223	0.473	0.274	1	0	0	0	0	0	C2o=	C2	(a.118.8.2)*2
1i1r_1	936	936	68	56	42	159.936	0.694	0.192	0.168	0.021	0.178	1	0	0	0	0	0	C2m≠	C2	(a.26.1.1)*2+(b.1.2.1,b.1.2.1,b.1.2.1)*2
1i2a_1	212	212	32	25	20	16.000	0.711	0.419	0.351	0.280	0.393	0	1	0	0	0	0	A1o	A	(e.24.1.1)*1
1i2k_1	538	538	42	29	28	34.104	0.737	0.528	0.417	0.403	0.482	0	0	1	0	0	0	C2o=	C2	(e.17.1.1)*2
1i2m_2	554	554	44	28	26	32.032	0.815	0.551	0.456	0.440	0.512	0	0	1	0	0	0	A2	A	(b.69.5.1)*1+(c.37.1.8)*1
1i2t_1	61	61	19	12	10	2.280	0.864	0.610	0.545	0.589	0.587	0	0	1	1	0	0	A1o	A	(a.144.1.1)*1
1i3s_1	283	283	41	24	20	19.680	0.932	0.477	0.386	0.615	0.445	0	1	0	0	0	0	A1o	A	(b.28.1.1)*1
1i4d_1	550	550	74	36	27	71.928	1.175	0.354	0.241	0.506	0.308	1	0	0	0	0	0	A3	A	(a.238.1.2)*2+(c.37.1.8)*1
1i4e_1	536	536	62	29	25	44.950	1.148	0.421	0.336	0.173	0.382	0	1	0	0	0	0	A2	A	(b.28.1.1)*1+(c.17.1.1)*1
1i4m_1	216	216	46	21	13	12.558	1.353	0.593	0.467	0.537	0.541	0	0	1	0	0	0	C2o=	C2	(d.6.1.1)*2
1i4s_1	294	294	36	24	20	17.280	0.818	0.542	0.466	0.583	0.522	0	0	1	0	0	0	C2o=	C2	(a.149.1.1)*2
1i4u_1	361	361	36	25	23	20.700	0.750	0.522	0.448	0.433	0.490	0	0	1	0	0	0	C2o=	C2	(b.60.1.1)*2
1i5p_1	633	633	52	35	31	56.420	0.788	0.541	0.353	0.574	0.458	0	0	1	0	0	0	A1m	A	(f.1.3.1,b.77.2.1,b.18.1.3)*1
1i6v_1	2839	2839	123	61	58	435.174	1.034	0.271	0.194	0.104	0.234	1	0	0	0	0	0	A4+	A	(a.143.1.1)*1+(d.74.3.1,d.181.1.1)*2+(e.29.1.1)*1+(e.29.1.2)*1
1i71_1	83	83	26	15	11	4.290	1.000	0.634	0.506	0.673	0.587	0	0	1	1	0	0	A1o	A	(g.14.1.1)*1
1i7q_1	1418	1418	57	52	43	127.452	0.600	0.431	0.321	0.435	0.386	0	1	0	0	0	0	C2o≠	C2	(c.23.16.1)*2+(d.161.1.1)*2
1iai_1	1732	1732	106	45	44	209.880	1.191	0.424	0.256	0.343	0.342	1	0	0	0	0	0	C2m=	C2	(b.1.1.1,b.1.1.2)*8
1ias_1	1644	1644	70	68	35	166.600	0.680	0.275	0.268	0.037	0.270	1	0	0	0	0	0	C4+	C5	(d.144.1.7)*5
1ib1_1	812	812	50	38	34	64.600	0.694	0.396	0.342	0.046	0.365	0	1	0	0	0	0	C2o≠	C2	(a.118.7.1)*2+(d.108.1.1)*2
1iby_1	336	336	29	26	25	18.850	0.569	0.576	0.453	0.356	0.515	0	0	1	0	0	0	C3	C3	(b.6.1.4)*3
1ifg_1	140	140	34	21	13	9.282	1.000	0.535	0.406	0.530	0.483	0	0	1	0	0	0	A1o	A	(b.16.1.1)*1
1ig0_1	636	636	45	37	33	54.945	0.643	0.490	0.362	0.526	0.446	0	1	0	0	0	0	C2m=	C2	(c.100.1.1,b.82.6.1)*2
1ihg_1	364	364	54	31	21	35.154	1.038	0.348	0.282	0.120	0.318	1	0	0	0	0	0	A1m	A	(b.62.1.1,a.118.8.1)*1
1ijq_1	308	308	33	23	21	15.939	0.750	0.583	0.489	0.609	0.543	0	0	1	0	0	0	A1m	A	(b.68.5.1,g.3.11.1)*1
1ijx_1	250	250	37	24	23	20.424	0.787	0.527	0.364	0.601	0.457	0	0	1	0	0	0	A2	A	(a.141.1.1)*2
1ik6_1	1136	1136	59	50	40	118.000	0.656	0.386	0.272	0.217	0.331	1	0	0	0	0	0	D2	D2	(c.36.1.7,c.48.1.2)*4
1ikp_1	599	599	49	34	27	44.982	0.803	0.512	0.372	0.539	0.452	0	0	1	0	0	0	A1m	A	(b.29.1.7,f.1.5.1,d.166.1.1)*1
1ile_1	821	821	69	44	25	75.900	1.000	0.380	0.309	0.475	0.354	0	1	0	0	0	0	A1m	A	(c.26.1.1,b.51.1.1,a.27.1.1)*1
1im5_1	179	179	24	19	17	7.752	0.667	0.587	0.526	0.648	0.569	0	0	1	1	0	0	A1o	A	(c.33.1.3)*1
1in0_1	162	162	43	16	15	10.320	1.387	0.543	0.422	0.687	0.497	0	0	1	0	0	0	A1m	A	(d.58.49.1,d.58.49.1)*1
1io1_1	395	395	78	38	18	53.352	1.393	0.313	0.209	0.333	0.262	1	0	0	0	0	0	A1o	A	(e.32.1.1)*1
1iom_1	748	748	51	37	27	50.949	0.797	0.548	0.410	0.651	0.494	0	0	1	0	0	0	C2o=	C2	(a.103.1.1)*2
1ipa_1	258	258	37	25	19	17.575	0.841	0.489	0.371	0.699	0.441	0	1	0	0	0	0	A1m	A	(d.79.3.3,c.116.1.1)*1
1iq0_1	588	588	53	37	26	50.986	0.841	0.445	0.332	0.596	0.400	0	1	0	0	0	0	A1m	A	(d.67.2.1,c.26.1.1,a.27.1.1)*1
1iq4_1	179	179	35	24	17	14.280	0.854	0.471	0.356	0.601	0.428	0	1	0	0	0	0	A1o	A	(d.77.1.1)*1
1iq8_1	1154	1154	59	49	40	115.640	0.663	0.443	0.295	0.484	0.379	1	0	0	0	0	0	C2m=	C2	(c.1.20.1,d.17.6.1,b.122.1.1)*2
1iqp_1	1949	1949	73	61	47	209.291	0.676	0.323	0.273	0.340	0.309	1	0	0	0	0	0	C2m=	C2	(c.37.1.20,a.80.1.1)*6
1iqz_1	81	81	18	15	12	3.240	0.667	0.629	0.540	0.559	0.597	0	0	1	1	0	0	A1o	A	(d.58.1.4)*1
1ir6_1	385	385	35	26	25	22.750	0.686	0.440	0.403	0.341	0.426	0	1	0	0	0	0	A1o	A	(c.107.1.2)*1
1ire_1	862	862	56	38	38	80.864	0.737	0.494	0.339	0.502	0.428	0	1	0	0	0	0	C2o≠	C2	(b.34.4.4)*2+(d.149.1.1)*2
1is7_1	2780	2780	70	51	51	182.070	0.686	0.453	0.404	0.058	0.424	0	1	0	0	0	0	D4+	D5	(d.205.1.1)*10+(d.96.1.1)*10
1is9_1	358	358	29	25	22	15.950	0.617	0.593	0.541	0.587	0.581	0	0	1	1	0	0	A1o	A	(a.102.1.2)*1
1itx_1	419	419	37	32	25	29.600	0.649	0.539	0.377	0.654	0.464	0	0	1	0	0	0	A1m	A	(c.1.8.5,d.26.3.1)*1
1iu9_1	111	111	21	15	14	4.410	0.724	0.590	0.551	0.647	0.581	0	0	1	1	0	0	A1o	A	(c.78.2.1)*1
1iuq_1	357	357	36	26	25	23.400	0.706	0.538	0.412	0.433	0.481	0	0	1	0	0	0	A1o	A	(c.112.1.1)*1
1iv3_1	450	450	32	32	24	24.576	0.571	0.575	0.483	0.593	0.542	0	0	1	0	0	0	C3	C3	(d.79.5.1)*3
1iw0_1	207	207	30	20	18	10.800	0.789	0.562	0.490	0.614	0.539	0	0	1	0	0	0	A1o	A	(a.132.1.1)*1
1iwp_1	1754	1754	64	52	46	153.088	0.653	0.475	0.339	0.541	0.423	0	1	0	0	0	0	C2o≠	C2	(a.23.2.1)*2+(c.1.19.3)*2+(c.51.3.1)*2
1ix9_1	410	410	37	30	23	25.530	0.698	0.525	0.421	0.561	0.486	0	0	1	0	0	0	C2m=	C2	(a.2.11.1,d.44.1.1)*2
1ixc_1	1156	1156	70	42	33	97.020	0.933	0.376	0.330	0.127	0.358	0	1	0	0	0	0	C2m=	C2	(a.4.5.37,c.94.1.1)*4
1ixs_1	365	365	53	31	23	37.789	0.981	0.409	0.280	0.366	0.351	1	0	0	0	0	0	A2	A	(a.5.1.1)*1+(c.37.1.20,a.4.5.11)*1
1ixx_1	756	756	49	40	39	76.440	0.620	0.406	0.307	0.071	0.359	0	1	0	0	0	0	C3	C3	(d.169.1.1)*6
1iye_1	1824	1824	54	53	48	137.376	0.535	0.526	0.382	0.364	0.462	0	0	1	0	0	0	D3	D3	(e.17.1.1)*6
1iyw_1	862	862	66	43	30	85.140	0.904	0.083	0.071	0.083	0.077	1	0	0	0	0	0	A1m	A	(c.26.1.1,b.51.1.1,a.27.1.1,a.2.7.3)*1
1izm_1	340	340	39	25	22	21.450	0.830	0.592	0.429	0.704	0.517	0	0	1	0	0	0	C2o=	C2	(a.199.1.1)*2
1j09_1	468	468	62	29	22	39.556	1.216	0.400	0.327	0.532	0.373	0	1	0	0	0	0	A1m	A	(c.26.1.1,a.97.1.1)*1
1j0p_1	108	108	25	18	14	6.300	0.781	0.422	0.374	0.243	0.399	0	1	0	0	0	0	A1o	A	(a.138.1.1)*1
1j11_1	516	516	47	35	25	41.125	0.783	0.483	0.354	0.542	0.432	0	1	0	0	0	0	A1m	A	(c.1.8.1,b.3.1.1)*1
1j1j_1	868	868	51	44	42	94.248	0.593	0.129	0.216	0.009	0.177	1	0	0	0	1	0	C4+	C4	(a.118.16.1)*4
1j27_1	98	98	26	14	12	4.368	1.000	0.571	0.506	0.588	0.542	0	0	1	1	0	0	A1o	A	(d.58.50.1)*1
1j2j_1	206	206	29	23	20	13.340	0.674	0.587	0.433	0.673	0.520	0	0	1	0	0	0	A2	A	(a.7.8.1)*1+(c.37.1.8)*1
1j2p_1	1701	1701	63	63	37	146.853	0.630	0.417	0.310	0.219	0.366	0	1	0	0	0	0	C4+	C7	(d.153.1.4)*7
1j34_1	298	298	40	24	18	17.280	0.952	0.594	0.491	0.586	0.556	0	0	1	0	0	0	A3	A	(d.169.1.1)*2+(g.32.1.1)*1
1j3a_1	129	129	24	21	17	8.568	0.632	0.576	0.409	0.447	0.500	0	0	1	0	0	0	A1o	A	(c.21.1.1)*1
1j3i_1	1104	1104	60	55	34	112.200	0.674	0.420	0.316	0.124	0.373	0	1	0	0	0	0	C2o≠	C2	(c.71.1.1)*2+(d.117.1.1)*2
1j3w_1	535	535	39	34	32	42.432	0.591	0.471	0.332	0.332	0.401	0	1	0	0	0	0	D2	D2	(d.110.7.1)*4
1j5u_1	127	127	41	24	12	11.808	1.139	0.517	0.319	0.663	0.424	0	0	1	0	0	0	A1o	A	(d.208.1.1)*1
1j5y_1	172	172	35	21	18	13.230	0.897	0.471	0.345	0.593	0.417	0	1	0	0	0	0	A1m	A	(a.4.5.1,d.94.2.1)*1
1j8b_1	184	184	41	27	18	19.926	0.911	0.342	0.257	0.094	0.295	1	0	0	0	0	0	C2o=	C2	(d.222.1.1)*2
1j8u_1	614	614	55	34	25	46.750	0.932	0.489	0.381	0.408	0.442	0	1	0	0	0	0	C2o=	C2	(d.178.1.1)*2
1j98_1	308	308	28	24	24	16.128	0.583	0.541	0.490	0.487	0.532	0	0	1	0	0	0	C2o=	C2	(d.185.1.2)*2
1j9c_1	559	559	61	30	28	51.240	1.052	0.442	0.322	0.574	0.397	0	1	0	0	0	0	A3	A	(b.1.2.1,b.1.2.1)*1+(b.47.1.2)*1+(g.3.11.1,g.3.11.1)*1
1jat_1	284	284	40	30	20	24.000	0.800	0.482	0.341	0.610	0.428	0	1	0	0	0	0	A2	A	(d.20.1.1)*2
1jb3_1	127	127	27	17	16	7.344	0.818	0.574	0.444	0.590	0.522	0	0	1	0	0	0	A1o	A	(b.40.3.2)*1
1jbw_1	410	410	37	31	22	25.234	0.698	0.523	0.427	0.419	0.485	0	0	1	0	0	0	A1m	A	(c.72.2.2,c.59.1.2)*1
1jch_1	1104	1104	127	45	39	222.885	1.512	0.197	0.143	0.317	0.179	1	0	0	0	0	0	C2m≠	C2	(b.110.1.1,h.4.9.1,b.101.1.1)*2+(d.26.2.1)*2
1jck_1	954	954	67	44	33	97.284	0.870	0.406	0.287	0.570	0.362	1	0	0	0	0	0	C2m≠	C2	(b.1.1.1,b.1.1.2)*2+(b.40.2.2,d.15.6.1)*2
1je6_1	275	275	50	24	19	22.800	1.163	0.371	0.312	0.186	0.346	0	1	0	0	0	0	A1m	A	(d.19.1.1,b.1.1.2)*1
1jeq_1	1068	1068	65	45	37	108.225	0.793	0.370	0.285	0.507	0.336	1	0	0	0	0	0	A2	A	(c.62.1.3,b.131.1.1,a.140.2.1)*1+(c.62.1.4,b.131.1.2)*1
1jfb_1	399	399	34	32	23	25.024	0.618	0.489	0.425	0.413	0.467	0	1	0	0	0	0	A1o	A	(a.104.1.1)*1
1jfm_1	174	174	29	23	15	10.005	0.763	0.587	0.455	0.546	0.530	0	0	1	0	0	0	A1o	A	(d.19.1.1)*1
1jg5_1	415	415	34	32	23	25.024	0.618	0.550	0.444	0.502	0.508	0	0	1	0	0	0	C4+	C5	(d.205.1.1)*5
1jgt_1	990	990	52	38	37	73.112	0.693	0.419	0.356	0.364	0.401	0	1	0	0	0	0	C2m=	C2	(d.153.1.1,c.26.2.1)*2
1jhh_1	316	316	49	28	20	27.440	1.021	0.469	0.326	0.641	0.410	0	1	0	0	0	0	A2	A	(a.4.5.2,b.87.1.1)*1+(b.87.1.1)*1
1jhn_1	380	380	57	41	29	67.773	0.814	0.096	0.122	0.017	0.109	1	0	0	0	1	0	A1m	A	(b.29.1.12,b.104.1.1)*1
1jig_1	1752	1752	46	46	46	97.336	0.500	0.115	0.389	0.000	0.273	1	0	0	0	1	0	TOI	T	(a.25.1.1)*12
1jiw_1	575	575	53	39	22	45.474	0.869	0.496	0.341	0.597	0.429	0	1	0	0	0	0	A2	A	(b.61.2.1)*1+(d.92.1.6,b.80.7.1)*1
1jk9_1	396	396	34	33	31	34.782	0.531	0.360	0.294	0.224	0.330	1	0	0	0	0	0	A2	A	(b.1.8.1)*1+(d.58.17.1,b.1.8.1)*1
1jl9_1	87	87	37	14	11	5.698	1.480	0.582	0.409	0.651	0.507	0	0	1	0	0	0	C2o=	C2	(g.3.11.1)*2
1jm1_1	202	202	23	22	18	9.108	0.575	0.618	0.527	0.700	0.586	0	0	1	1	0	0	A1o	A	(b.33.1.1)*1
1jmm_1	377	377	44	30	21	27.720	0.863	0.522	0.375	0.506	0.453	0	0	1	0	0	0	A1o	A	(b.30.6.1)*1
1jnr_1	1582	1582	59	42	39	96.642	0.728	0.572	0.469	0.502	0.534	0	0	1	0	0	0	C2m≠	C2	(c.3.1.4,d.168.1.1,a.7.3.1)*2+(d.58.1.5)*2
1jo0_1	97	97	23	16	13	4.784	0.793	0.589	0.490	0.713	0.556	0	0	1	0	0	0	A1o	A	(d.68.4.1)*1
1jof_1	1460	1460	58	54	44	137.808	0.592	0.397	0.290	0.200	0.346	1	0	0	0	0	0	D2	D2	(b.69.10.1)*4
1jov_1	269	269	31	24	21	15.624	0.689	0.605	0.469	0.674	0.544	0	0	1	0	0	0	A1o	A	(b.30.5.7)*1
1jq5_1	2928	2928	73	72	42	220.752	0.640	0.376	0.337	0.007	0.346	0	1	0	0	0	0	D4+	D4	(e.22.1.2)*8
1jqj_1	694	694	51	44	31	69.564	0.680	0.259	0.256	0.055	0.259	1	0	0	0	0	0	A2	A	(c.37.1.20,a.80.1.1)*1+(d.131.1.1,d.131.1.1,d.131.1.1)*1
1jql_1	506	506	52	37	27	51.948	0.812	0.363	0.274	0.364	0.319	1	0	0	0	0	0	A2	A	(c.37.1.20)*1+(d.131.1.1,d.131.1.1,d.131.1.1)*1
1jqp_1	1392	1392	52	45	44	102.960	0.584	0.452	0.384	0.018	0.414	0	1	0	0	0	0	D2	D2	(b.61.5.1,d.3.1.1)*4
1jr3_1	1769	1769	64	54	46	158.976	0.640	0.258	0.286	0.073	0.276	1	0	0	0	1	0	A4+	A	(c.37.1.20,a.80.1.1)*5
1jr7_1	1224	1224	54	53	35	100.170	0.614	0.299	0.319	0.170	0.312	1	0	0	0	1	0	C4+	C4	(b.82.2.3)*4
1jro_1	2420	2420	89	61	38	206.302	0.899	0.469	0.344	0.379	0.419	0	1	0	0	0	0	C2m≠	C2	(d.15.4.2,a.56.1.1,d.145.1.3,d.87.2.1)*2+(d.41.1.1,d.133.1.1)*2
1js0_1	372	372	42	41	17	29.274	0.724	0.471	0.347	0.386	0.422	0	1	0	0	0	0	C3	C3	(d.5.1.1)*3
1jsg_1	222	222	31	29	22	19.778	0.608	0.471	0.347	0.554	0.423	0	1	0	0	0	0	C2o=	C2	(b.63.1.1)*2
1jst_1	1112	1112	59	48	34	96.288	0.720	0.376	0.326	0.139	0.354	0	1	0	0	0	0	C2m≠	C2	(a.74.1.1,a.74.1.1)*2+(d.144.1.7)*2
1jtd_1	535	535	41	29	26	30.914	0.745	0.531	0.438	0.542	0.496	0	0	1	0	0	0	A2	A	(b.69.5.2)*1+(e.3.1.1)*1
1jva_2	430	430	53	33	24	41.976	0.930	0.460	0.304	0.549	0.387	0	1	0	0	0	0	A1m	A	(b.86.1.2,d.95.2.2,d.95.2.2)*1
1jvn_1	537	537	41	33	28	37.884	0.672	0.570	0.411	0.546	0.504	0	0	1	0	0	0	A1m	A	(c.23.16.1,c.1.2.1)*1
1jw9_1	642	642	37	35	33	42.735	0.544	0.537	0.410	0.551	0.489	0	0	1	0	0	0	C2o≠	C2	(c.111.1.1)*2+(d.15.3.1)*2
1jwh_1	1075	1075	83	52	40	172.640	0.902	0.319	0.193	0.484	0.266	1	0	0	0	0	0	C2o≠	C2	(d.144.1.7)*2+(g.41.4.1)*2
1jwy_1	1039	1039	88	37	30	97.680	1.313	0.435	0.321	0.491	0.386	0	1	0	0	0	0	A1m	A	(c.37.1.9,b.34.3.1,c.37.1.8)*1
1jx7_1	702	702	40	29	28	32.480	0.702	0.494	0.505	0.048	0.498	0	1	0	0	1	0	D3	D3	(c.114.1.1)*6
1jyh_1	155	155	28	20	19	10.640	0.718	0.562	0.417	0.702	0.506	0	0	1	0	0	0	A1o	A	(d.60.1.3)*1
1jyo_1	726	726	76	28	25	53.200	1.434	0.454	0.365	0.533	0.418	0	1	0	0	0	0	C2o≠	C2	(d.184.1.2)*2+(d.198.1.1)*4
1jzd_1	551	551	47	36	27	45.684	0.746	0.406	0.333	0.082	0.371	0	1	0	0	0	0	A3	A	(b.1.17.1)*1+(d.17.3.1,c.47.1.9)*2
1jzt_1	243	243	28	23	21	13.524	0.636	0.582	0.472	0.555	0.543	0	0	1	0	0	0	A1o	A	(c.104.1.1)*1
1k04_1	284	284	48	40	21	40.320	0.787	0.289	0.208	0.193	0.250	1	0	0	0	0	0	C2o=	C2	(a.24.14.1)*2
1k0r_1	326	326	66	31	24	49.104	1.200	0.248	0.185	0.298	0.222	1	0	0	0	0	0	A1m	A	(d.202.1.1,b.40.4.5,d.52.3.1,d.52.3.1)*1
1k1f_1	267	267	42	25	18	18.900	0.977	0.565	0.409	0.433	0.500	0	0	1	0	0	0	D2	D2	(a.147.1.1)*4
1k20_1	620	620	48	30	26	37.440	0.857	0.519	0.428	0.529	0.489	0	0	1	0	0	0	C2o=	C2	(c.107.1.1)*2
1k24_1	249	249	44	20	16	14.080	1.222	0.492	0.444	0.141	0.472	0	1	0	0	0	0	A1o	A	(f.4.4.2)*1
1k28_1	2763	2763	126	50	49	308.700	1.273	0.403	0.279	0.453	0.354	1	0	0	0	0	0	C3	C3	(b.106.1.1,b.106.1.1)*3+(b.40.8.1,d.2.1.3,b.108.1.2)*3
1k32_1	6138	6138	92	92	51	431.664	0.643	0.294	0.367	0.053	0.344	1	0	0	0	1	0	D3	D3	(b.68.7.1,b.69.9.1,c.14.1.2,b.36.1.3)*6
1k3i_1	651	651	49	35	26	44.590	0.803	0.553	0.408	0.552	0.491	0	0	1	0	0	0	A1m	A	(b.18.1.1,b.69.1.1,b.1.18.2)*1
1k3s_1	215	215	31	24	20	14.880	0.705	0.517	0.397	0.383	0.464	0	0	1	0	0	0	C2o=	C2	(d.198.1.1)*2
1k40_1	126	126	36	14	11	5.544	1.440	0.598	0.530	0.631	0.576	0	0	1	1	0	0	A1o	A	(a.24.14.1)*1
1k46_1	124	124	31	23	14	9.982	0.838	0.415	0.325	0.679	0.388	0	1	0	0	0	0	A1o	A	(d.195.1.1)*1
1k4n_1	183	183	32	20	20	12.800	0.800	0.559	0.402	0.696	0.493	0	0	1	0	0	0	A1o	A	(d.32.1.5)*1
1k4z_1	314	314	44	29	27	34.452	0.786	0.429	0.275	0.441	0.363	1	0	0	0	0	0	C2o=	C2	(b.80.5.1)*2
1k5c_1	333	333	34	24	19	15.504	0.791	0.572	0.483	0.665	0.539	0	0	1	0	0	0	A1o	A	(b.80.1.3)*1
1k5d_1	696	696	55	40	31	68.200	0.775	0.409	0.292	0.430	0.360	1	0	0	0	0	0	A3	A	(b.55.1.3)*1+(c.10.1.2)*1+(c.37.1.8)*1
1k6m_1	864	864	48	47	34	76.704	0.593	0.481	0.331	0.464	0.411	0	1	0	0	0	0	C2m=	C2	(c.37.1.7,c.60.1.4)*2
1k6w_1	2538	2538	70	69	48	231.840	0.598	0.455	0.329	0.267	0.398	0	1	0	0	0	0	D3	D3	(b.92.1.2,c.1.9.5)*6
1k6y_1	766	766	54	39	35	73.710	0.730	0.397	0.294	0.420	0.352	1	0	0	0	0	0	C2m=	C2	(a.4.10.1,c.55.3.2)*4
1k7j_1	206	206	26	20	18	9.360	0.684	0.595	0.529	0.603	0.573	0	0	1	1	0	0	A1o	A	(d.115.1.1)*1
1k8t_1	498	498	62	35	31	67.270	0.939	0.339	0.231	0.536	0.294	1	0	0	0	0	0	A1o	A	(e.41.1.1)*1
1k92_1	1776	1776	71	51	40	144.840	0.780	0.542	0.374	0.327	0.462	0	0	1	0	0	0	D2	D2	(c.26.2.1,d.210.1.1)*4
1k93_3	646	646	61	35	30	64.050	0.938	0.365	0.285	0.264	0.331	1	0	0	0	0	0	A2	A	(a.39.1.5)*1+(e.41.1.1)*1
1k9o_1	599	599	57	31	26	45.942	1.000	0.459	0.343	0.582	0.410	0	1	0	0	0	0	A2	A	(b.47.1.2)*1+(e.1.1.1)*1
1ka1_1	354	354	33	24	23	18.216	0.702	0.583	0.499	0.615	0.557	0	0	1	0	0	0	A1o	A	(e.7.1.1)*1
1ka9_1	446	446	37	27	24	23.976	0.725	0.557	0.465	0.555	0.522	0	0	1	0	0	0	A2	A	(c.1.2.1)*1+(c.23.16.1)*1
1kac_1	927	927	58	58	29	97.556	0.667	0.516	0.302	0.486	0.415	0	0	1	0	0	0	C3	C3	(b.1.1.1)*3+(b.21.1.1)*3
1kaf_1	108	108	20	17	15	5.100	0.625	0.587	0.506	0.691	0.557	0	0	1	1	0	0	A1o	A	(d.199.1.1)*1
1kb0_1	670	670	41	36	29	42.804	0.631	0.570	0.444	0.562	0.522	0	0	1	0	0	0	A1m	A	(b.70.1.1,a.3.1.6)*1
1kbi_1	1818	1818	75	55	41	169.125	0.781	0.474	0.338	0.271	0.418	0	1	0	0	0	0	C4+	C4	(c.1.4.1)*2+(d.120.1.1,c.1.4.1)*2
1kbp_1	1696	1696	63	50	46	144.900	0.656	0.379	0.326	0.033	0.348	0	1	0	0	0	0	D2	D2	(b.1.12.1,d.159.1.1)*4
1kcf_1	468	468	52	32	23	38.272	0.945	0.475	0.355	0.648	0.431	0	1	0	0	0	0	C2m=	C2	(a.140.2.1,c.55.3.7)*2
1kfq_1	1142	1142	69	39	34	91.494	0.945	0.430	0.342	0.416	0.392	0	1	0	0	0	0	C2m=	C2	(c.84.1.1,c.84.1.1,c.84.1.1,d.129.2.1)*2
1kfu_1	883	883	64	40	28	71.680	0.941	0.491	0.370	0.348	0.440	0	1	0	0	0	0	A2	A	(a.39.1.8)*1+(d.3.1.3,b.14.1.1,a.39.1.8)*1
1kgs_1	219	219	41	22	17	15.334	1.051	0.483	0.391	0.454	0.453	0	1	0	0	0	0	A1m	A	(c.23.1.1,a.4.6.1)*1
1kgy_1	638	638	46	39	30	53.820	0.667	0.424	0.345	0.129	0.387	0	1	0	0	0	0	C2o≠	C2	(b.18.1.4)*2+(b.6.1.5)*2
1ki0_1	253	253	38	29	18	19.836	0.809	0.376	0.324	0.166	0.346	0	1	0	0	0	0	A1m	A	(g.14.1.1,g.14.1.1,g.14.1.1)*1
1kig_1	352	352	44	29	21	26.796	0.880	0.561	0.385	0.651	0.485	0	0	1	0	0	0	A3	A	(b.47.1.2)*1+(g.3.11.1)*1+(g.8.1.2)*1
1kjn_1	304	304	33	24	22	17.424	0.717	0.581	0.452	0.499	0.526	0	0	1	0	0	0	C2o=	C2	(c.115.1.1)*2
1kjq_1	773	773	55	29	29	46.255	0.948	0.532	0.447	0.519	0.505	0	0	1	0	0	0	C2m=	C2	(c.30.1.1,d.142.1.2,b.84.2.1)*2
1kjw_1	292	292	38	30	24	27.360	0.704	0.333	0.282	0.515	0.322	1	0	0	0	0	0	A1m	A	(b.34.2.1,c.37.1.1)*1
1kk8_1	1086	1086	100	48	32	153.600	1.250	0.256	0.204	0.056	0.228	1	0	0	0	0	0	A3	A	(a.39.1.5)*2+(c.37.1.9,b.34.3.1)*1
1kkm_1	1578	1578	65	49	49	156.065	0.663	0.504	0.301	0.247	0.398	0	0	1	0	0	0	D3	D3	(c.91.1.2)*6+(d.94.1.1)*6
1kl9_1	168	168	29	20	16	9.280	0.806	0.592	0.453	0.678	0.528	0	0	1	0	0	0	A1m	A	(b.40.4.5,a.60.14.1)*1
1klf_1	484	484	58	34	27	53.244	0.951	0.408	0.260	0.557	0.345	1	0	0	0	0	0	A2	A	(b.1.11.1,b.7.2.1)*1+(b.2.3.2,b.2.3.2)*1
1klo_1	648	648	56	47	43	113.176	0.622	0.367	0.173	0.308	0.272	1	0	0	0	0	0	D2	D2	(g.3.11.2,g.3.11.2,g.3.11.2)*4
1knc_1	521	521	33	32	24	25.344	0.589	0.561	0.504	0.189	0.538	0	0	1	1	0	0	C3	C3	(a.152.1.1)*3
1knr_1	529	529	40	32	27	34.560	0.678	0.562	0.420	0.530	0.497	0	0	1	0	0	0	A1m	A	(c.3.1.4,d.168.1.1,a.7.3.1)*1
1knx_1	1827	1827	81	78	34	214.812	0.723	0.397	0.269	0.317	0.348	1	0	0	0	0	0	D3	D3	(c.98.2.1,c.91.1.2)*6
1kny_1	506	506	34	32	28	30.464	0.567	0.327	0.389	0.018	0.349	0	1	0	0	1	0	C2m=	C2	(d.218.1.1,a.24.16.1)*2
1koa_1	894	894	55	43	34	80.410	0.714	0.468	0.339	0.311	0.414	0	1	0	0	0	0	C2m=	C2	(d.144.1.7,b.1.1.4)*2
1kol_1	1584	1584	53	45	44	104.940	0.596	0.496	0.399	0.096	0.448	0	1	0	0	0	0	D2	D2	(b.35.1.2,c.2.1.1)*4
1kpt_1	210	210	35	21	16	11.760	0.946	0.581	0.450	0.524	0.529	0	0	1	0	0	0	C2o=	C2	(d.70.1.1)*2
1kq5_1	156	156	36	23	17	14.076	0.900	0.444	0.307	0.575	0.388	0	1	0	0	0	0	A1o	A	(b.80.5.1)*1
1kq6_1	140	140	32	22	14	9.856	0.889	0.587	0.420	0.543	0.514	0	0	1	0	0	0	A1o	A	(d.189.1.1)*1
1kqf_1	4461	4461	100	73	73	532.900	0.685	0.413	0.267	0.444	0.349	1	0	0	0	0	0	C3	C3	(c.81.1.1,b.52.2.2)*3+(d.58.1.5,f.23.22.1)*3+(f.21.1.1)*3
1kqp_1	542	542	36	32	29	33.408	0.590	0.474	0.415	0.369	0.457	0	1	0	0	0	0	C2o=	C2	(c.26.2.1)*2
1krh_1	337	337	36	28	23	23.184	0.706	0.537	0.405	0.493	0.482	0	0	1	0	0	0	A1m	A	(d.15.4.2,b.43.4.2,c.25.1.2)*1
1ks2_1	436	436	50	23	22	25.300	1.111	0.568	0.442	0.445	0.516	0	0	1	0	0	0	C2m=	C2	(c.124.1.4,d.58.40.1)*2
1ksk_1	234	234	43	21	20	18.060	1.049	0.422	0.329	0.575	0.389	0	1	0	0	0	0	A1m	A	(d.66.1.5,d.265.1.3)*1
1kt1_1	374	374	47	42	29	57.246	0.662	0.195	0.176	0.130	0.186	1	0	0	0	0	0	A1m	A	(d.26.1.1,d.26.1.1,a.118.8.1)*1
1ku2_1	480	480	40	37	34	50.320	0.563	0.437	0.289	0.518	0.372	1	0	0	0	0	0	C2m=	C2	(a.177.1.1,a.4.13.1)*2
1ku6_1	596	596	40	39	30	46.800	0.580	0.523	0.366	0.402	0.453	0	0	1	0	0	0	A2	A	(c.69.1.1)*1+(g.7.1.1)*1
1kwg_1	1932	1932	57	56	48	153.216	0.548	0.375	0.357	0.033	0.366	0	1	0	0	0	0	C3	C3	(c.1.8.1,c.23.16.5,b.71.1.1)*3
1kwm_1	402	402	35	29	26	26.390	0.636	0.577	0.449	0.572	0.530	0	0	1	0	0	0	A1m	A	(d.58.3.1,c.56.5.1)*1
1kxq_1	616	616	52	30	25	39.000	0.945	0.552	0.428	0.477	0.496	0	0	1	0	0	0	A2	A	(b.1.1.1)*1+(c.1.8.1,b.71.1.1)*1
1ky9_1	1866	1866	59	59	50	174.050	0.541	0.248	0.246	0.054	0.246	1	0	0	0	0	0	D3	D3	(b.47.1.1,b.36.1.4)*6
1ky9_2	2376	2376	64	64	51	208.896	0.557	0.296	0.289	0.069	0.297	1	0	0	0	0	0	D3	D3	(b.47.1.1,b.36.1.4,b.36.1.4)*6
1kyo_1	4460	4460	110	108	69	819.720	0.621	0.307	0.182	0.295	0.247	1	0	0	0	0	0	A4+	A	(a.3.1.1)*1+(a.3.1.3,f.23.11.1)*2+(b.1.1.1)*4+(d.185.1.1,d.185.1.1)*4+(f.21.1.2,f.32.1.1)*2+(f.23.12.1,b.33.1.1)*2+(f.23.13.1)*2+(f.23.14.1)*2+(f.27.1.1)*2+(f.28.1.1)*2
1kyq_1	535	535	50	38	32	60.800	0.714	0.403	0.271	0.502	0.347	1	0	0	0	0	0	C2m=	C2	(c.2.1.11,e.37.1.1)*2
1kz7_1	525	525	53	37	35	68.635	0.736	0.391	0.250	0.527	0.329	1	0	0	0	0	0	A2	A	(a.87.1.1,b.55.1.1)*1+(c.37.1.8)*1
1kzq_1	506	506	45	40	32	57.600	0.625	0.362	0.241	0.448	0.306	1	0	0	0	0	0	C2m=	C2	(b.6.2.1,b.6.2.1)*2
1kzy_1	854	854	56	47	34	89.488	0.691	0.345	0.276	0.098	0.313	1	0	0	0	0	0	A4+	A	(b.2.5.2)*2+(c.15.1.4,c.15.1.4)*2
1l0n_1	2097	2097	93	66	50	306.900	0.802	0.341	0.211	0.316	0.282	1	0	0	0	0	0	A4+	A	(a.3.1.3,f.23.11.1)*1+(d.184.1.3)*1+(d.185.1.1,d.185.1.1)*2+(f.21.1.2,f.32.1.1)*1+(f.23.12.1,b.33.1.1)*1+(f.23.13.1)*1+(f.23.14.1)*1+(f.23.15.1)*1+(f.27.1.1)*1+(f.28.1.1)*1
1l0o_1	339	339	35	29	27	27.405	0.625	0.538	0.357	0.595	0.459	0	0	1	0	0	0	A3	A	(a.4.13.2)*1+(d.122.1.3)*2
1l0s_1	88	88	19	14	12	3.192	0.731	0.610	0.558	0.552	0.593	0	0	1	1	0	0	A1o	A	(b.81.2.1)*1
1l0w_1	1160	1160	65	55	38	135.850	0.699	0.466	0.275	0.482	0.379	1	0	0	0	0	0	C2m=	C2	(b.40.4.1,d.104.1.1,d.74.4.1)*2
1l1l_1	717	717	46	40	33	60.720	0.630	0.488	0.350	0.368	0.428	0	1	0	0	0	0	A1o	A	(c.7.1.4)*1
1l2p_1	61	61	60	6	5	1.800	5.455	0.729	0.610	0.874	0.691	0	0	1	1	0	1	A1o	A	(f.23.21.1)*1
1l2w_1	296	296	39	26	19	19.266	0.867	0.577	0.437	0.449	0.520	0	0	1	0	0	0	A3	A	(d.184.1.2)*1+(d.198.1.1)*2
1l3p_1	204	204	41	17	16	11.152	1.242	0.538	0.441	0.564	0.509	0	0	1	0	0	0	C2o=	C2	(a.24.17.1)*2
1l3w_1	540	540	133	43	22	125.818	2.046	0.037	0.094	0.000	0.071	1	0	0	0	1	1	A1m	A	(b.1.6.1,b.1.6.1,b.1.6.1,b.1.6.1,b.1.6.1)*1
1l4d_1	361	361	42	32	24	32.256	0.750	0.500	0.334	0.622	0.426	0	0	1	0	0	0	A2	A	(b.47.1.2)*1+(d.15.5.1)*1
1l5j_1	862	862	50	39	35	68.250	0.676	0.510	0.362	0.534	0.444	0	0	1	0	0	0	A1m	A	(a.118.15.1,c.8.2.1,c.83.1.1)*1
1l6j_1	405	405	44	28	26	32.032	0.815	0.457	0.339	0.541	0.409	0	1	0	0	0	0	A1m	A	(a.20.1.2,d.92.1.11,g.14.1.2,g.14.1.2,g.14.1.2)*1
1l6s_1	2584	2584	64	63	47	189.504	0.582	0.470	0.380	0.153	0.434	0	1	0	0	0	0	D4+	D4	(c.1.10.3)*8
1l7a_1	1908	1908	56	55	38	117.040	0.602	0.401	0.420	0.020	0.405	0	1	0	0	1	0	D3	D3	(c.69.1.25)*6
1l7r_1	573	573	44	33	23	33.396	0.786	0.559	0.459	0.511	0.522	0	0	1	0	0	0	A1m	A	(c.69.1.21,b.18.1.13)*1
1l8w_4	300	300	49	21	16	16.464	1.324	0.535	0.431	0.586	0.502	0	0	1	0	0	0	A1o	A	(a.154.1.1)*1
1l9b_1	918	918	58	44	34	86.768	0.744	0.423	0.314	0.518	0.376	0	1	0	0	0	0	A4+	A	(a.3.1.1)*1+(f.23.10.1,b.41.1.1)*1+(f.26.1.1)*2
1l9l_1	74	74	18	17	12	3.672	0.621	0.624	0.507	0.614	0.574	0	0	1	1	0	0	A1o	A	(a.64.1.1)*1
1l9v_1	2504	2504	64	63	55	221.760	0.542	0.177	0.275	0.000	0.224	1	0	0	0	1	0	D4+	D4	(d.216.1.1,d.13.2.1)*8
1lam_1	2904	2904	68	67	47	214.132	0.596	0.441	0.371	0.075	0.403	0	1	0	0	0	0	D3	D3	(c.50.1.1,c.56.5.3)*6
1lb4_1	155	155	30	23	16	11.040	0.769	0.581	0.403	0.604	0.495	0	0	1	0	0	0	A1o	A	(b.8.1.1)*1
1lbu_1	213	213	29	20	17	9.860	0.784	0.587	0.498	0.602	0.555	0	0	1	0	0	0	A1m	A	(a.20.1.1,d.65.1.1)*1
1lc0_1	290	290	41	26	20	21.320	0.891	0.530	0.394	0.641	0.475	0	0	1	0	0	0	A1m	A	(c.2.1.3,d.81.1.4)*1
1ldd_1	296	296	30	29	22	19.140	0.588	0.536	0.417	0.141	0.469	0	0	1	0	0	0	D2	D2	(a.4.5.34)*4
1ldj_1	813	813	92	41	37	139.564	1.179	0.241	0.175	0.177	0.213	1	0	0	0	0	0	A2	A	(a.118.17.1,e.40.1.1,a.4.5.34)*1+(g.44.1.1)*1
1ldk_1	971	971	96	45	42	181.440	1.103	0.140	0.144	0.016	0.142	1	0	0	0	1	0	A4+	A	(a.118.17.1)*1+(a.158.1.1)*1+(d.42.1.1,a.157.1.1)*1+(e.40.1.1,a.4.5.34)*1+(g.44.1.1)*1
1leh_1	2912	2912	69	63	63	273.861	0.548	0.424	0.291	0.087	0.349	1	0	0	0	0	0	D4+	D4	(c.58.1.1,c.2.1.7)*8
1lf6_1	674	674	51	32	27	44.064	0.864	0.575	0.444	0.598	0.526	0	0	1	0	0	0	A1m	A	(b.30.5.5,a.102.1.5)*1
1lfp_1	243	243	29	25	19	13.775	0.659	0.479	0.434	0.276	0.461	0	1	0	0	0	0	A1o	A	(e.39.1.1)*1
1lfw_1	468	468	42	26	25	27.300	0.824	0.531	0.447	0.599	0.500	0	0	1	0	0	0	A1m	A	(c.56.5.4,d.58.19.1)*1
1lg7_1	164	164	28	19	17	9.044	0.778	0.611	0.474	0.740	0.554	0	0	1	0	0	0	A1o	A	(d.213.1.1)*1
1lgh_1	792	792	42	39	39	63.882	0.538	0.294	0.284	0.012	0.273	1	0	0	0	0	0	A4+	A	(f.3.1.1)*16
1lgp_1	226	226	34	24	22	17.952	0.739	0.452	0.347	0.579	0.415	0	1	0	0	0	0	C2o=	C2	(b.26.1.2)*2
1li4_1	1720	1720	60	51	36	110.160	0.690	0.533	0.433	0.328	0.501	0	0	1	0	0	0	D2	D2	(c.23.12.3,c.2.1.4)*4
1lk5_1	916	916	55	39	38	81.510	0.714	0.460	0.323	0.387	0.401	0	1	0	0	0	0	D2	D2	(c.124.1.4,d.58.40.1)*4
1lkt_1	312	312	32	31	18	17.856	0.653	0.486	0.437	0.252	0.472	0	1	0	0	0	0	C3	C3	(b.90.1.1)*3
1lky_1	462	462	48	46	26	57.408	0.667	0.319	0.239	0.337	0.286	1	0	0	0	0	0	A4+	A	(a.60.1.1)*6
1ll1_1	3540	3540	82	67	66	362.604	0.617	0.435	0.309	0.169	0.372	0	1	0	0	0	0	D3	D3	(a.85.1.1,a.86.1.1,b.1.18.3)*6
1lmi_1	131	131	23	18	14	5.796	0.719	0.611	0.509	0.691	0.573	0	0	1	1	0	0	A1o	A	(b.1.19.1)*1
1lnl_1	2448	2448	85	59	55	275.825	0.746	0.313	0.264	0.093	0.291	1	0	0	0	0	0	C2m=	C2	(a.86.1.1,b.112.1.1)*6
1lnq_1	2408	2408	68	67	67	305.252	0.507	0.340	0.203	0.027	0.257	1	0	0	0	0	0	D4+	D4	(f.14.1.1,c.2.1.9,d.286.1.1)*8
1lns_1	1526	1526	56	53	50	148.400	0.544	0.410	0.318	0.192	0.367	0	1	0	0	0	0	C2m=	C2	(a.40.2.1,c.69.1.21,b.18.1.13)*2
1lnz_1	342	342	64	33	25	52.800	1.103	0.382	0.210	0.522	0.302	1	0	0	0	0	0	A1m	A	(b.117.1.1,c.37.1.8)*1
1lou_1	97	97	24	15	14	5.040	0.828	0.566	0.485	0.675	0.541	0	0	1	0	0	0	A1o	A	(d.58.14.1)*1
1lpb_1	534	534	52	30	26	40.560	0.929	0.455	0.360	0.568	0.418	0	1	0	0	0	0	A2	A	(c.69.1.19,b.12.1.2)*1+(g.3.10.1,g.3.10.1)*1
1lqt_2	454	454	43	33	25	35.475	0.741	0.480	0.358	0.360	0.430	0	1	0	0	0	0	A1m	A	(c.4.1.1,c.3.1.1)*1
1lqv_2	206	206	33	23	21	15.939	0.750	0.516	0.374	0.281	0.448	0	0	1	0	0	0	A2	A	(d.19.1.1)*1+(g.32.1.1)*1
1lr0_1	126	126	39	19	15	11.115	1.147	0.415	0.296	0.609	0.368	1	0	0	0	0	0	A1o	A	(d.212.1.1)*1
1lr7_1	73	73	27	13	12	4.212	1.080	0.524	0.387	0.606	0.467	0	0	1	0	0	0	A1m	A	(g.3.11.3,g.68.1.1)*1
1lri_1	98	98	20	15	13	3.900	0.714	0.429	0.487	0.069	0.453	0	1	0	0	1	0	A1o	A	(a.134.1.1)*1
1lrz_1	400	400	59	29	22	37.642	1.157	0.466	0.326	0.575	0.411	0	1	0	0	0	0	A1m	A	(d.108.1.4,d.108.1.4,a.2.7.4)*1
1lsh_1	1129	1129	66	48	42	133.056	0.733	0.320	0.251	0.223	0.292	1	0	0	0	0	0	A2	A	(f.7.1.1)*1+(f.7.1.1,a.118.4.1,f.7.1.1)*1
1lsl_1	113	113	64	17	9	9.792	2.462	0.163	0.226	0.001	0.194	1	0	0	0	1	1	A1m	A	(g.60.1.1,g.60.1.1)*1
1ltq_1	1192	1192	63	45	41	116.235	0.733	0.295	0.264	0.138	0.281	1	0	0	0	0	0	D2	D2	(c.37.1.1,c.108.1.9)*4
1lu9_1	861	861	55	54	24	71.280	0.705	0.466	0.317	0.434	0.401	0	1	0	0	0	0	C3	C3	(c.58.1.4,c.2.1.7)*3
1luj_1	572	572	73	30	24	52.560	1.352	0.392	0.294	0.445	0.349	1	0	0	0	0	0	A2	A	(a.118.1.1)*1+(a.161.1.1)*1
1lva_1	258	258	50	28	16	22.400	1.136	0.362	0.315	0.203	0.347	0	1	0	0	0	0	A1m	A	(a.4.5.35,a.4.5.35,a.4.5.35,a.4.5.35)*1
1lw7_1	1376	1376	54	46	39	96.876	0.635	0.395	0.386	0.051	0.394	0	1	0	0	0	0	D2	D2	(c.26.1.3,c.37.1.1)*4
1lxj_1	416	416	31	29	24	21.576	0.585	0.529	0.491	0.550	0.531	0	0	1	0	0	0	D2	D2	(d.58.48.1)*4
1lxn_1	99	99	28	18	11	5.544	0.966	0.465	0.408	0.649	0.457	0	1	0	0	0	0	A1o	A	(d.58.48.1)*1
1m0w_1	960	960	66	38	30	75.240	0.971	0.497	0.378	0.568	0.454	0	1	0	0	0	0	C2m=	C2	(d.142.1.6,c.30.1.4)*2
1m15_1	356	356	35	29	22	22.330	0.686	0.540	0.444	0.396	0.506	0	0	1	0	0	0	A1m	A	(a.83.1.1,d.128.1.2)*1
1m1g_3	244	244	47	39	20	36.660	0.797	0.307	0.201	0.420	0.260	1	0	0	0	0	0	A1m	A	(d.58.42.1,b.114.1.1,b.34.5.4)*1
1m1h_1	182	182	38	19	18	12.996	1.027	0.423	0.345	0.308	0.387	0	1	0	0	0	0	A1m	A	(d.58.42.1,b.114.1.1)*1
1m1l_1	940	940	56	47	40	105.280	0.644	0.337	0.261	0.118	0.302	1	0	0	0	0	0	C2o=	C2	(d.260.1.1)*4
1m1z_2	490	490	36	34	24	29.376	0.621	0.529	0.428	0.606	0.491	0	0	1	0	0	0	A1m	A	(d.153.1.1,c.26.2.1)*1
1m22_2	487	487	36	31	25	27.900	0.643	0.587	0.458	0.598	0.537	0	0	1	0	0	0	A1o	A	(c.117.1.1)*1
1m2k_1	249	249	37	22	18	14.652	0.925	0.522	0.435	0.678	0.496	0	0	1	0	0	0	A1o	A	(c.31.1.5)*1
1m2o_1	1758	1758	89	60	45	240.300	0.848	0.376	0.233	0.433	0.319	1	0	0	0	0	0	C2m≠	C2	(b.2.8.1,g.41.10.1,c.62.1.2,a.71.2.1,d.109.2.1)*2+(c.37.1.8)*2
1m2t_1	510	510	46	30	22	30.360	0.885	0.539	0.432	0.614	0.495	0	0	1	0	0	0	A2	A	(b.42.2.1,b.42.2.1)*1+(d.165.1.1)*1
1m4y_1	2052	2052	53	52	48	132.288	0.530	0.180	0.349	0.000	0.276	1	0	0	0	1	0	D4+	D6	(d.153.1.4)*12
1m56_1	1114	1114	58	44	33	84.216	0.753	0.541	0.393	0.514	0.476	0	0	1	0	0	0	A4+	A	(f.17.2.1,b.6.1.2)*1+(f.23.8.1)*1+(f.24.1.1)*1+(f.25.1.1)*1
1m6n_1	1604	1604	64	55	45	158.400	0.640	0.398	0.299	0.301	0.357	1	0	0	0	0	0	C2m=	C2	(c.37.1.19,a.162.1.1,c.37.1.19,a.172.1.1)*2
1m6y_1	293	293	33	24	21	16.632	0.733	0.550	0.474	0.494	0.515	0	0	1	0	0	0	A1m	A	(c.66.1.23,a.60.13.1)*1
1m70_1	190	190	30	20	16	9.600	0.833	0.525	0.467	0.242	0.505	0	0	1	0	0	0	A1m	A	(a.3.1.4,a.3.1.4)*1
1m9i_1	664	664	51	38	34	65.892	0.708	0.440	0.291	0.582	0.372	1	0	0	0	0	0	A1m	A	(a.65.1.1,a.65.1.1)*1
1m9s_1	523	523	120	40	21	100.800	1.967	0.098	0.128	0.001	0.113	1	0	0	0	1	0	A1m	A	(c.10.2.1,b.1.18.15,b.34.11.1,b.34.11.1,b.34.11.1)*1
1m9x_2	310	310	47	26	21	25.662	1.000	0.458	0.332	0.399	0.404	0	1	0	0	0	0	A2	A	(a.73.1.1)*1+(b.62.1.1)*1
1ma9_1	799	799	62	44	36	98.208	0.775	0.454	0.261	0.570	0.363	1	0	0	0	0	0	A2	A	(a.126.1.1,a.126.1.1,a.126.1.1)*1+(c.55.1.1,c.55.1.1)*1
1mby_1	150	150	32	22	13	9.152	0.914	0.449	0.408	0.089	0.426	0	1	0	0	0	0	C2o=	C2	(d.223.1.1)*2
1mc2_1	122	122	23	19	14	6.118	0.697	0.608	0.495	0.673	0.562	0	0	1	0	0	0	A1o	A	(a.133.1.2)*1
1mda_1	1184	1184	66	42	39	108.108	0.815	0.474	0.312	0.467	0.403	0	1	0	0	0	0	C2o≠	C2	(b.6.1.1)*2+(b.69.2.1)*2+(g.21.1.1)*2
1mdu_1	1455	1455	77	57	47	206.283	0.740	0.270	0.201	0.348	0.245	1	0	0	0	0	0	A4+	A	(c.55.1.1,c.55.1.1)*3+(d.109.1.1)*3
1mgt_1	169	169	23	22	15	7.590	0.622	0.564	0.526	0.636	0.564	0	0	1	1	0	0	A1m	A	(c.55.7.1,a.4.2.1)*1
1mh3_1	421	421	44	37	23	37.444	0.733	0.483	0.335	0.419	0.421	0	1	0	0	0	0	A1m	A	(c.94.1.1,a.4.1.1)*1
1mhh_1	497	497	42	37	25	38.850	0.677	0.432	0.338	0.319	0.386	0	1	0	0	0	0	A3	A	(b.1.1.1,b.1.1.2)*2+(d.15.7.1)*1
1mhp_2	415	415	49	30	20	29.400	0.980	0.579	0.406	0.565	0.502	0	0	1	0	0	0	A3	A	(b.1.1.1)*2+(c.62.1.1)*1
1miw_1	790	790	70	40	29	81.200	1.014	0.317	0.258	0.442	0.296	1	0	0	0	0	0	C2m=	C2	(d.218.1.4,a.173.1.1)*2
1mix_1	206	206	41	24	15	14.760	1.051	0.555	0.398	0.680	0.484	0	0	1	0	0	0	A1m	A	(a.11.2.1,b.55.1.5)*1
1mk0_1	97	97	20	16	12	3.840	0.714	0.573	0.559	0.637	0.581	0	0	1	1	0	0	A1o	A	(d.226.1.1)*1
1mkf_1	742	742	48	42	28	56.448	0.686	0.470	0.360	0.280	0.423	0	1	0	0	0	0	C2o=	C2	(b.116.1.1)*2
1mkk_1	187	187	41	20	17	13.940	1.108	0.447	0.360	0.338	0.412	0	1	0	0	0	0	C2o=	C2	(g.17.1.1)*2
1mkm_1	986	986	66	37	35	85.470	0.917	0.459	0.340	0.361	0.403	0	1	0	0	0	0	C2m=	C2	(a.4.5.33,d.110.2.2)*4
1mky_1	407	407	49	30	28	41.160	0.845	0.425	0.304	0.536	0.377	0	1	0	0	0	0	A1m	A	(c.37.1.8,c.37.1.8,d.52.5.1)*1
1mla_1	305	305	29	23	22	14.674	0.644	0.540	0.473	0.469	0.512	0	0	1	0	0	0	A1m	A	(c.19.1.1,d.58.23.1)*1
1mn8_4	97	97	24	17	12	4.896	0.828	0.654	0.496	0.690	0.585	0	0	1	0	0	0	A1o	A	(a.61.1.6)*1
1mo1_1	174	174	42	19	13	10.374	1.312	0.565	0.425	0.657	0.500	0	0	1	0	0	0	C2o=	C2	(d.94.1.1)*2
1mog_1	804	804	36	35	35	44.100	0.514	0.359	0.444	0.002	0.400	0	1	0	0	1	0	TOI	T	(d.230.2.1)*12
1mp9_1	382	382	52	33	22	37.752	0.945	0.513	0.322	0.504	0.423	0	0	1	0	0	0	C2m=	C2	(d.129.1.1,d.129.1.1)*2
1mpg_1	282	282	32	27	18	15.552	0.711	0.578	0.481	0.608	0.546	0	0	1	0	0	0	A1m	A	(d.129.1.2,a.96.1.3)*1
1mpx_1	2456	2456	56	54	53	160.272	0.523	0.377	0.390	0.025	0.383	0	1	0	0	1	0	D2	D2	(c.69.1.21,b.18.1.13)*4
1mr1_1	291	291	47	26	21	25.662	1.000	0.461	0.323	0.627	0.404	0	1	0	0	0	0	A2	A	(b.26.1.1)*1+(d.217.1.2)*1
1msk_1	327	327	40	27	23	24.840	0.800	0.398	0.349	0.343	0.379	0	1	0	0	0	0	A1o	A	(d.173.1.1)*1
1mvf_1	171	171	36	20	16	11.520	1.000	0.530	0.382	0.637	0.472	0	0	1	0	0	0	A2	A	(b.1.1.1)*1+(b.129.1.1)*1
1mvk_2	188	188	29	25	15	10.875	0.725	0.384	0.380	0.264	0.384	0	1	0	0	0	0	D2	D2	(d.15.7.1)*4
1mw5_1	648	648	48	43	38	78.432	0.593	0.483	0.287	0.441	0.392	1	0	0	0	0	0	D2	D2	(d.259.1.1)*4
1mw9_1	556	556	52	39	22	44.616	0.852	0.370	0.328	0.569	0.363	0	1	0	0	0	0	A1o	A	(e.10.1.1)*1
1mwq_1	200	200	29	19	19	10.469	0.763	0.592	0.475	0.472	0.541	0	0	1	0	0	0	C2o=	C2	(d.58.4.7)*2
1mzg_1	287	287	57	22	19	23.826	1.390	0.511	0.358	0.526	0.441	0	0	1	0	0	0	C2o=	C2	(d.224.1.1)*2
1n0e_1	1130	1130	56	55	27	83.160	0.683	0.254	0.337	0.001	0.296	1	0	0	0	1	0	C4+	C8	(b.129.1.2)*8
1n10_1	228	228	36	33	18	21.384	0.706	0.408	0.293	0.367	0.358	1	0	0	0	0	0	A1m	A	(b.52.1.3,b.7.3.1)*1
1n1c_1	397	397	49	38	29	53.998	0.731	0.349	0.223	0.286	0.297	1	0	0	0	0	0	C2o=	C2	(a.184.1.1)*2
1n1t_1	628	628	52	34	27	47.736	0.852	0.527	0.372	0.537	0.460	0	0	1	0	0	0	A1m	A	(b.68.1.1,b.29.1.15)*1
1n2m_1	482	482	31	31	30	28.830	0.508	0.516	0.437	0.397	0.491	0	0	1	0	0	0	C3	C3	(d.155.1.2)*3
1n4k_1	292	292	47	25	22	25.850	1.000	0.472	0.329	0.637	0.410	0	1	0	0	0	0	A1m	A	(b.42.6.1,a.118.22.1)*1
1n4w_1	499	499	39	26	25	25.350	0.765	0.558	0.495	0.262	0.533	0	0	1	0	0	0	A1m	A	(c.3.1.2,d.16.1.1)*1
1n5u_1	583	583	50	46	26	59.800	0.694	0.431	0.294	0.426	0.366	1	0	0	0	0	0	A1m	A	(a.126.1.1,a.126.1.1,a.126.1.1)*1
1n7u_1	1108	1108	84	55	35	161.700	0.933	0.378	0.207	0.328	0.296	1	0	0	0	0	0	C2o=	C2	(b.126.1.1)*2
1n7z_1	656	656	48	40	30	57.600	0.686	0.395	0.318	0.411	0.368	0	1	0	0	0	0	C2o=	C2	(b.127.1.1)*2
1n81_1	186	186	37	29	14	15.022	0.860	0.518	0.362	0.540	0.450	0	0	1	0	0	0	A1o	A	(a.185.1.1)*1
1n8j_1	1860	1860	69	67	32	147.936	0.697	0.145	0.285	0.000	0.216	1	0	0	0	1	0	D4+	D5	(c.47.1.10)*10
1n8v_2	103	103	20	19	14	5.320	0.606	0.406	0.459	0.101	0.441	0	1	0	0	1	0	A1o	A	(a.118.21.1)*1
1n8z_1	1015	1015	77	50	32	123.200	0.939	0.308	0.232	0.202	0.272	1	0	0	0	0	0	A3	A	(b.1.1.1,b.1.1.2)*2+(c.10.2.5,g.3.9.1,c.10.2.5,g.3.9.1)*1
1n93_1	1340	1340	54	42	41	92.988	0.651	0.281	0.344	0.064	0.318	1	0	0	0	1	0	C4+	C4	(a.206.1.1)*4
1n99_1	325	325	41	30	14	17.220	0.932	0.569	0.461	0.538	0.526	0	0	1	0	0	0	C2m=	C2	(b.36.1.1,b.36.1.1)*2
1na6_1	760	760	52	46	32	76.544	0.667	0.432	0.304	0.569	0.383	0	1	0	0	0	0	C2m=	C2	(b.142.1.1,c.52.1.22)*2
1nap_1	261	261	26	22	20	11.440	0.619	0.500	0.491	0.249	0.492	0	0	1	0	0	0	D2	D2	(d.9.1.1)*4
1nbw_1	1436	1436	64	52	45	149.760	0.660	0.366	0.263	0.345	0.324	1	0	0	0	0	0	C2m≠	C2	(c.51.3.2)*2+(c.55.1.6,c.8.6.1,c.55.1.6)*2
1nc7_1	465	465	30	29	27	23.490	0.536	0.617	0.522	0.555	0.578	0	0	1	1	0	0	C4+	C4	(b.123.1.1)*4
1nd7_1	374	374	40	34	22	29.920	0.714	0.522	0.371	0.572	0.451	0	0	1	0	0	0	A1o	A	(d.148.1.1)*1
1ndb_1	596	596	50	37	26	48.100	0.794	0.525	0.376	0.447	0.462	0	0	1	0	0	0	A1m	A	(c.43.1.3,c.43.1.3)*1
1nds_1	330	330	43	33	16	22.704	0.878	0.160	0.121	0.154	0.145	1	0	0	0	0	0	A1m	A	(b.6.1.3,b.6.1.3)*1
1nez_1	615	615	46	37	31	52.762	0.676	0.415	0.335	0.422	0.384	0	1	0	0	0	0	A4+	A	(b.1.1.1)*2+(b.1.1.2)*1+(d.19.1.1,b.1.1.2)*1
1nf3_1	317	317	41	31	20	25.420	0.804	0.521	0.352	0.557	0.443	0	0	1	0	0	0	A2	A	(b.36.1.1)*1+(c.37.1.8)*1
1nfi_2	621	621	65	34	25	55.250	1.102	0.412	0.319	0.512	0.379	0	1	0	0	0	0	A3	A	(b.1.18.1)*1+(b.2.5.3,b.1.18.1)*1+(d.211.1.1)*1
1ng6_1	148	148	32	25	17	13.600	0.762	0.487	0.318	0.656	0.412	0	1	0	0	0	0	A1o	A	(a.182.1.1)*1
1ni5_1	866	866	75	46	43	148.350	0.843	0.284	0.178	0.456	0.239	1	0	0	0	0	0	C2m=	C2	(c.26.2.5,d.229.1.1,b.153.1.2)*2
1nig_1	146	146	34	20	15	10.200	0.971	0.577	0.398	0.535	0.497	0	0	1	0	0	0	A1o	A	(a.25.2.1)*1
1nij_1	317	317	35	27	22	20.790	0.714	0.536	0.400	0.610	0.474	0	0	1	0	0	0	A1m	A	(c.37.1.10,d.237.1.1)*1
1njh_1	216	216	29	20	18	10.440	0.763	0.589	0.498	0.417	0.548	0	0	1	0	0	0	C2o=	C2	(b.128.1.1)*2
1njr_1	498	498	42	34	27	38.556	0.689	0.502	0.390	0.493	0.463	0	0	1	0	0	0	C2o=	C2	(c.50.1.2)*2
1nkg_1	508	508	46	28	23	29.624	0.902	0.550	0.439	0.631	0.504	0	0	1	0	0	0	A1m	A	(b.30.5.10,b.3.1.2,b.18.1.25)*1
1nki_1	268	268	31	25	20	15.500	0.689	0.583	0.474	0.504	0.545	0	0	1	0	0	0	C2o=	C2	(d.32.1.2)*2
1nkz_1	846	846	54	41	40	88.560	0.667	0.218	0.216	0.000	0.201	1	0	0	0	0	0	A4+	A	(f.3.1.1)*18
1nl0_1	474	474	54	28	24	36.288	1.038	0.484	0.366	0.533	0.434	0	1	0	0	0	0	A3	A	(b.1.1.1,b.1.1.2)*2+(g.32.1.1)*1
1nls_1	948	948	45	44	41	81.180	0.529	0.512	0.344	0.258	0.432	0	0	1	0	0	0	D2	D2	(b.29.1.1)*4
1nlx_1	1456	1456	86	55	46	217.580	0.851	0.275	0.201	0.398	0.248	1	0	0	0	0	0	A4+	A	(a.24.17.1)*14
1nms_1	480	480	37	31	28	32.116	0.627	0.542	0.435	0.490	0.501	0	0	1	0	0	0	C2o=	C2	(c.17.1.1)*2
1nnw_1	503	503	43	29	29	36.163	0.741	0.523	0.394	0.630	0.475	0	0	1	0	0	0	C2o=	C2	(d.159.1.5)*2
1no1_1	67	67	16	15	9	2.160	0.667	0.548	0.559	0.344	0.560	0	0	1	1	1	0	A1o	A	(a.179.1.1)*1
1no7_1	542	542	47	29	24	32.712	0.887	0.585	0.450	0.579	0.532	0	0	1	0	0	0	A1o	A	(e.48.1.1)*1
1nof_1	383	383	37	25	22	20.350	0.787	0.610	0.478	0.603	0.546	0	0	1	0	0	0	A1m	A	(b.71.1.2,c.1.8.3)*1
1np3_1	3924	3924	68	67	66	300.696	0.511	0.378	0.321	0.044	0.339	0	1	0	0	0	0	TOI	T	(c.2.1.6,a.100.1.2)*12
1npe_1	427	427	56	30	24	40.320	1.037	0.421	0.298	0.525	0.368	1	0	0	0	0	0	A2	A	(b.68.5.1)*1+(g.3.11.2,g.3.11.2,g.3.11.2)*1
1nqb_1	1392	1392	66	53	53	185.394	0.623	0.323	0.228	0.080	0.277	1	0	0	0	0	0	D3	D3	(b.1.1.1,b.1.1.1)*6
1nrj_1	338	338	37	31	25	28.675	0.661	0.428	0.333	0.436	0.392	0	1	0	0	0	0	A2	A	(c.37.1.8)*1+(d.110.4.4)*1
1nsn_1	565	565	61	30	23	42.090	1.151	0.447	0.368	0.517	0.414	0	1	0	0	0	0	A3	A	(b.1.1.1,b.1.1.2)*2+(b.40.1.1)*1
1nsz_1	686	686	54	32	24	41.472	0.964	0.553	0.440	0.549	0.505	0	0	1	0	0	0	C2o=	C2	(b.30.5.4)*2
1nt2_1	890	890	77	43	31	102.641	1.041	0.145	0.211	0.007	0.181	1	0	0	0	1	0	C2o≠	C2	(a.183.1.1)*2+(c.66.1.3)*2
1nth_1	2742	2742	65	53	52	179.140	0.619	0.498	0.415	0.126	0.461	0	1	0	0	0	0	D3	D3	(c.1.25.1)*6
1ntk_1	4228	4228	100	77	70	539.000	0.680	0.370	0.246	0.301	0.310	1	0	0	0	0	0	C2m≠	C2	(a.3.1.3,f.23.11.1)*2+(d.184.1.3)*2+(d.185.1.1,d.185.1.1)*4+(f.21.1.2,f.32.1.1)*2+(f.23.12.1,b.33.1.1)*2+(f.23.13.1)*2+(f.23.14.1)*2+(f.23.15.1)*2+(f.27.1.1)*2+(f.28.1.1)*2
1nty_1	305	305	44	34	19	28.424	0.830	0.434	0.321	0.618	0.392	0	1	0	0	0	0	A1m	A	(a.87.1.1,b.55.1.1)*1
1nu9_1	571	571	48	36	31	53.568	0.716	0.424	0.315	0.398	0.379	0	1	0	0	0	0	A2	A	(a.8.6.1,a.8.6.1)*1+(b.47.1.2)*1
1nug_2	679	679	64	35	24	53.760	1.085	0.555	0.380	0.666	0.480	0	0	1	0	0	0	A1m	A	(b.1.18.9,d.3.1.4,b.1.5.1,b.1.5.1)*1
1nui_1	242	242	46	25	18	20.700	1.070	0.392	0.305	0.379	0.360	0	1	0	0	0	0	A1m	A	(g.41.3.2,e.13.1.2)*1
1nvi_1	446	446	58	30	21	36.540	1.137	0.528	0.359	0.588	0.453	0	0	1	0	0	0	C2o≠	C2	(d.15.3.1)*2+(d.41.5.1)*2
1nvm_1	1297	1297	82	37	30	91.020	1.224	0.544	0.395	0.546	0.478	0	0	1	0	0	0	C2m≠	C2	(c.1.10.5,a.5.7.1)*2+(c.2.1.3,d.81.1.1)*2
1nvv_1	801	801	61	44	28	75.152	0.847	0.486	0.332	0.528	0.415	0	1	0	0	0	0	A3	A	(a.117.1.1)*1+(c.37.1.8)*2
1nw9_1	329	329	37	31	23	26.381	0.685	0.555	0.377	0.669	0.477	0	0	1	0	0	0	A2	A	(c.17.1.1)*1+(g.52.1.1)*1
1nwz_1	125	125	20	18	14	5.040	0.625	0.618	0.546	0.551	0.588	0	0	1	1	0	0	A1o	A	(d.110.3.1)*1
1nxh_1	242	242	43	20	15	12.900	1.229	0.530	0.486	0.566	0.526	0	0	1	0	0	0	C2o=	C2	(a.200.1.1)*2
1nxu_1	665	665	41	30	29	35.670	0.695	0.548	0.469	0.479	0.518	0	0	1	0	0	0	C2o=	C2	(c.122.1.1)*2
1nxz_1	491	491	41	32	29	38.048	0.672	0.425	0.341	0.557	0.399	0	1	0	0	0	0	C2m=	C2	(b.122.1.2,c.116.1.5)*2
1ny5_1	769	769	51	39	29	57.681	0.750	0.409	0.371	0.449	0.403	0	1	0	0	0	0	C2m=	C2	(c.23.1.1,c.37.1.20)*2
1nyc_1	111	111	25	21	16	8.400	0.676	0.583	0.384	0.489	0.485	0	0	1	0	0	0	A1o	A	(b.61.2.2)*1
1nyr_1	1279	1279	82	52	41	174.824	0.882	0.387	0.228	0.466	0.318	1	0	0	0	0	0	C2m=	C2	(d.15.10.1,d.67.1.1,d.104.1.1,c.51.1.1)*2
1nz0_4	111	111	22	17	16	5.984	0.667	0.557	0.476	0.589	0.526	0	0	1	0	0	0	A1o	A	(d.14.1.2)*1
1nze_1	112	112	27	15	12	4.860	1.000	0.599	0.531	0.551	0.573	0	0	1	1	0	0	A1o	A	(a.24.18.1)*1
1nzi_1	311	311	51	28	20	28.560	1.062	0.473	0.332	0.261	0.406	0	1	0	0	0	0	C2m=	C2	(b.23.1.1,g.3.11.1)*2
1o0w_1	477	477	53	36	23	43.884	0.898	0.523	0.330	0.651	0.433	0	0	1	0	0	0	C2m=	C2	(a.149.1.1,d.50.1.1)*2
1o1n_1	574	574	37	29	27	28.971	0.661	0.443	0.450	0.145	0.446	0	1	0	0	1	0	A3	A	(a.1.1.2)*2+(a.1.1.2,a.1.1.2)*1
1o22_1	298	298	34	33	19	21.318	0.654	0.456	0.387	0.392	0.430	0	1	0	0	0	0	C2o=	C2	(d.238.1.1)*2
1o3x_1	112	112	44	16	11	7.744	1.630	0.534	0.387	0.522	0.468	0	0	1	0	0	0	A1o	A	(a.7.8.1)*1
1o5e_1	358	358	39	27	22	23.166	0.796	0.558	0.412	0.528	0.497	0	0	1	0	0	0	A2	A	(b.47.1.2)*1+(d.170.1.2)*1
1o5h_1	398	398	38	29	21	23.142	0.760	0.584	0.462	0.532	0.543	0	0	1	0	0	0	C2o=	C2	(a.191.1.1)*2
1o6e_1	914	914	76	36	36	98.496	1.056	0.357	0.261	0.188	0.311	1	0	0	0	0	0	C2o=	C2	(b.57.1.1)*4
1o6v_1	464	464	61	31	24	45.384	1.109	0.243	0.242	0.024	0.239	1	0	0	0	0	0	A1m	A	(c.10.2.1,b.1.18.15)*1
1o7f_1	421	421	45	36	26	42.120	0.726	0.426	0.301	0.305	0.368	0	1	0	0	0	0	A1m	A	(b.82.3.2,a.4.5.31,b.82.3.2)*1
1o7j_1	1300	1300	45	43	37	71.595	0.562	0.547	0.465	0.331	0.513	0	0	1	0	0	0	D2	D2	(c.88.1.1)*4
1o7l_1	511	511	46	42	26	50.232	0.676	0.424	0.291	0.580	0.372	1	0	0	0	0	0	C2m=	C2	(a.4.5.8,b.40.6.2,b.40.6.2)*2
1o7n_1	1923	1923	59	59	44	153.164	0.573	0.502	0.383	0.204	0.451	0	0	1	0	0	0	C3	C3	(b.33.1.2,d.129.3.3)*3+(d.17.4.4)*3
1o82_1	70	70	17	13	13	2.873	0.654	0.600	0.526	0.585	0.572	0	0	1	1	0	0	A1o	A	(a.64.2.1)*1
1o98_1	509	509	41	27	25	27.675	0.788	0.575	0.483	0.622	0.543	0	0	1	0	0	0	A1m	A	(c.76.1.3,c.105.1.1)*1
1oaz_1	345	345	44	31	20	27.280	0.863	0.528	0.360	0.618	0.455	0	0	1	0	0	0	A3	A	(b.1.1.1)*2+(c.47.1.1)*1
1ob1_2	531	531	62	29	25	44.950	1.148	0.441	0.328	0.512	0.396	0	1	0	0	0	0	A3	A	(b.1.1.1,b.1.1.2)*2+(g.3.11.4,g.3.11.4)*1
1obo_1	169	169	21	19	16	6.384	0.600	0.630	0.582	0.703	0.617	0	0	1	1	0	0	A1o	A	(c.23.5.1)*1
1oc0_1	401	401	43	26	23	25.714	0.878	0.571	0.441	0.619	0.518	0	0	1	0	0	0	A2	A	(e.1.1.1)*1+(g.64.1.1)*1
1ock_1	824	824	52	31	29	46.748	0.867	0.539	0.452	0.362	0.507	0	0	1	0	0	0	C2o=	C2	(c.117.1.1)*2
1ocr_1	3572	3572	106	66	50	349.800	0.914	0.421	0.308	0.140	0.366	0	1	0	0	0	0	C2m≠	C2	(a.118.11.1)*2+(a.51.1.1)*2+(f.17.2.1,b.6.1.2)*2+(f.23.1.1)*2+(f.23.2.1)*2+(f.23.3.1)*2+(f.23.4.1)*2+(f.23.5.1)*2+(f.23.6.1)*2+(f.23.7.1)*2+(f.24.1.1)*2+(f.25.1.1)*2+(g.41.5.3)*2
1ocy_1	594	594	52	28	28	40.768	0.929	0.615	0.412	0.536	0.522	0	0	1	0	0	0	C3	C3	(d.231.1.1)*3
1oe1_1	1008	1008	49	48	33	77.616	0.605	0.593	0.397	0.588	0.504	0	0	1	0	0	0	C3	C3	(b.6.1.3,b.6.1.3)*3
1oel_1	7336	7336	103	86	84	744.072	0.606	0.215	0.252	0.005	0.239	1	0	0	0	1	0	D4+	D7	(a.129.1.1,d.56.1.1,c.8.5.1)*14
1oew_1	329	329	33	25	21	17.325	0.717	0.549	0.464	0.592	0.520	0	0	1	0	0	0	A1o	A	(b.50.1.2)*1
1oey_2	181	181	32	19	17	10.336	0.889	0.582	0.457	0.673	0.527	0	0	1	0	0	0	A2	A	(d.15.2.2)*2
1ofc_1	267	267	61	28	24	40.992	1.173	0.270	0.195	0.540	0.243	1	0	0	0	0	0	A1m	A	(a.187.1.1,a.4.1.3,a.4.1.13)*1
1ofd_1	1491	1491	59	48	44	124.608	0.641	0.520	0.364	0.571	0.455	0	0	1	0	0	0	A1m	A	(d.153.1.1,c.1.4.1,b.80.4.1)*1
1ofu_1	852	852	88	30	29	76.560	1.492	0.413	0.296	0.552	0.367	1	0	0	0	0	0	C2m≠	C2	(c.32.1.1,d.79.2.1)*2+(c.37.1.22)*2
1ofz_1	624	624	53	27	26	37.206	1.000	0.533	0.435	0.633	0.498	0	0	1	0	0	0	C2o=	C2	(b.68.8.1)*2
1ogy_1	917	917	50	37	35	64.750	0.694	0.569	0.418	0.528	0.506	0	0	1	0	0	0	A2	A	(a.138.1.3)*1+(c.81.1.1,b.52.2.2)*1
1oi7_1	270	270	33	21	17	11.781	0.868	0.607	0.525	0.636	0.576	0	0	1	1	0	0	A1m	A	(c.2.1.8,c.23.4.1)*1
1ois_1	221	221	36	25	21	18.900	0.783	0.414	0.333	0.533	0.385	0	1	0	0	0	0	A1o	A	(e.15.1.1)*1
1ojh_2	109	109	31	19	12	7.068	1.000	0.546	0.400	0.541	0.478	0	0	1	0	0	0	C2o=	C2	(a.214.1.1)*2
1ojx_1	1257	1257	52	51	27	71.604	0.667	0.501	0.440	0.325	0.475	0	0	1	0	0	0	C4+	C5	(c.1.10.1)*5
1ok0_1	74	74	19	14	10	2.660	0.792	0.618	0.572	0.573	0.603	0	0	1	1	0	0	A1o	A	(b.5.1.1)*1
1ok3_1	507	507	121	27	23	75.141	2.420	0.211	0.181	0.085	0.199	1	0	0	0	0	1	C2m=	C2	(g.18.1.1,g.18.1.1,g.18.1.1,g.18.1.1)*2
1ok8_1	1140	1140	67	42	42	118.188	0.798	0.462	0.303	0.315	0.388	0	1	0	0	0	0	C3	C3	(f.10.1.1,b.1.18.4)*3
1okc_1	292	292	38	25	23	21.850	0.792	0.406	0.344	0.061	0.368	0	1	0	0	0	0	A1o	A	(f.42.1.1)*1
1okg_1	362	362	44	27	22	26.136	0.898	0.482	0.369	0.373	0.432	0	1	0	0	0	0	A1m	A	(c.46.1.2,c.46.1.2,d.26.1.3)*1
1okh_1	92	92	29	12	10	3.480	1.318	0.637	0.546	0.528	0.599	0	0	1	1	0	0	C2o=	C2	(g.13.1.1)*2
1oks_1	54	54	21	12	9	2.268	1.000	0.590	0.524	0.562	0.566	0	0	1	1	0	0	A1o	A	(a.8.5.1)*1
1olt_1	434	434	34	30	25	25.500	0.618	0.457	0.439	0.183	0.449	0	1	0	0	0	0	A1o	A	(c.1.28.2)*1
1olz_1	1244	1244	60	56	41	137.760	0.619	0.342	0.267	0.458	0.317	1	0	0	0	0	0	C2m=	C2	(b.69.12.1,g.16.2.1,b.1.1.4)*2
1omi_2	227	227	30	26	18	14.040	0.682	0.444	0.402	0.430	0.430	0	1	0	0	0	0	A1m	A	(b.82.3.3,a.4.5.4)*1
1onx_1	3112	3112	68	67	50	227.800	0.581	0.476	0.360	0.101	0.416	0	1	0	0	0	0	D4+	D4	(b.92.1.7,c.1.9.13)*8
1oo0_1	236	236	32	25	20	16.000	0.711	0.549	0.418	0.663	0.495	0	0	1	0	0	0	A2	A	(d.232.1.1)*1+(d.58.7.1)*1
1oqj_1	90	90	20	19	12	4.560	0.645	0.629	0.491	0.519	0.567	0	0	1	0	0	0	A1o	A	(d.217.1.1)*1
1or7_1	247	247	43	24	19	19.608	1.000	0.500	0.350	0.586	0.435	0	0	1	0	0	0	A2	A	(a.177.1.1,a.4.13.2)*1+(a.180.1.1)*1
1ord_1	1460	1460	55	50	49	134.750	0.556	0.438	0.310	0.572	0.388	0	1	0	0	0	0	C2m=	C2	(c.23.1.4,c.67.1.5,d.125.1.1)*2
1orj_1	126	126	33	17	13	7.293	1.100	0.633	0.483	0.494	0.560	0	0	1	0	0	0	A1o	A	(a.24.19.1)*1
1ors_1	567	567	81	26	24	50.544	1.620	0.461	0.322	0.547	0.404	0	1	0	0	0	0	A3	A	(b.1.1.1,b.1.1.2)*2+(f.14.1.1)*1
1osp_1	683	683	62	43	29	77.314	0.861	0.268	0.232	0.336	0.256	1	0	0	0	0	0	A3	A	(b.1.1.1,b.1.1.2)*2+(b.76.1.1)*1
1osy_1	226	226	44	21	18	16.632	1.128	0.558	0.396	0.528	0.491	0	0	1	0	0	0	C2o=	C2	(b.1.21.1)*2
1ov9_1	93	93	30	16	12	5.760	1.071	0.559	0.432	0.589	0.505	0	0	1	0	0	0	C2o=	C2	(a.155.1.1)*2
1ova_2	758	758	43	38	34	55.556	0.597	0.472	0.367	0.482	0.429	0	1	0	0	0	0	C2o=	C2	(e.1.1.1)*2
1ovn_1	455	455	58	28	27	43.848	1.055	0.425	0.289	0.563	0.371	1	0	0	0	0	0	C2m=	C2	(c.47.1.7,a.71.1.1)*2
1ovo_1	224	224	26	25	19	12.350	0.591	0.504	0.444	0.373	0.487	0	0	1	0	0	0	C4+	C4	(g.68.1.1)*4
1ow1_1	167	167	28	26	19	13.832	0.622	0.580	0.369	0.626	0.484	0	0	1	0	0	0	A1o	A	(b.131.1.3)*1
1oxb_1	290	290	36	30	19	20.520	0.735	0.552	0.410	0.637	0.494	0	0	1	0	0	0	A2	A	(a.24.10.2)*1+(c.23.1.1)*1
1oxj_1	170	170	31	19	17	10.013	0.861	0.564	0.442	0.658	0.512	0	0	1	0	0	0	A1m	A	(a.60.1.2,a.118.1.13)*1
1oxx_1	352	352	46	29	22	29.348	0.902	0.454	0.326	0.603	0.402	0	1	0	0	0	0	A1m	A	(c.37.1.12,b.40.6.3)*1
1oy3_1	467	467	47	32	27	40.608	0.797	0.419	0.319	0.240	0.374	0	1	0	0	0	0	A3	A	(b.1.18.1)*2+(d.211.1.1)*1
1oyv_1	652	652	53	32	25	42.400	0.930	0.410	0.353	0.391	0.387	0	1	0	0	0	0	A3	A	(c.41.1.1)*2+(g.69.1.1,g.69.1.1)*1
1oyw_1	516	516	45	35	26	40.950	0.738	0.488	0.360	0.551	0.435	0	1	0	0	0	0	A1m	A	(c.37.1.19,c.37.1.19,a.4.5.43)*1
1oz2_1	324	324	41	34	20	27.880	0.759	0.490	0.343	0.214	0.418	0	1	0	0	0	0	A1m	A	(b.34.9.3,b.34.9.3,b.34.9.3)*1
1p0s_1	946	946	77	64	52	256.256	0.664	0.076	0.095	0.000	0.085	1	0	0	0	1	0	C2m≠	C2	(b.16.1.1)*2+(b.47.1.2)*2+(g.32.1.1,g.3.11.1)*2
1p1m_1	404	404	34	29	23	22.678	0.654	0.617	0.480	0.657	0.561	0	0	1	0	0	0	A1m	A	(b.92.1.4,c.1.9.9)*1
1p27_1	472	472	45	31	27	37.665	0.776	0.521	0.369	0.424	0.453	0	0	1	0	0	0	C2o≠	C2	(d.232.1.1)*2+(d.58.7.1)*2
1p35_2	596	596	57	34	29	56.202	0.905	0.422	0.330	0.332	0.388	0	1	0	0	0	0	C2o=	C2	(b.28.1.1)*2
1p3h_1	690	690	47	45	33	69.795	0.603	0.175	0.232	0.007	0.202	1	0	0	0	1	0	C4+	C7	(b.35.1.1)*7
1p3q_1	154	154	29	26	16	12.064	0.690	0.522	0.366	0.458	0.451	0	0	1	0	0	0	A3	A	(a.5.2.4)*2+(d.15.1.1)*1
1p4a_1	537	537	39	35	31	42.315	0.591	0.488	0.362	0.507	0.437	0	1	0	0	0	0	C2m=	C2	(a.4.5.40,c.61.1.1)*2
1p5d_1	455	455	37	31	25	28.675	0.661	0.550	0.427	0.587	0.498	0	0	1	0	0	0	A1m	A	(c.84.1.1,c.84.1.1,c.84.1.1,d.129.2.1)*1
1p5f_1	372	372	37	25	22	20.350	0.787	0.604	0.477	0.584	0.553	0	0	1	0	0	0	C2o=	C2	(c.23.16.2)*2
1p6a_1	309	309	39	27	19	20.007	0.848	0.528	0.415	0.531	0.482	0	0	1	0	0	0	A2	A	(b.1.1.1)*1+(b.21.1.1)*1
1p6o_1	317	317	31	25	24	18.600	0.633	0.587	0.455	0.606	0.531	0	0	1	0	0	0	C2o=	C2	(c.97.1.2)*2
1p7l_1	1532	1532	82	38	37	115.292	1.093	0.544	0.395	0.529	0.483	0	0	1	0	0	0	D2	D2	(d.130.1.1,d.130.1.1,d.130.1.1)*4
1p84_1	3892	3892	104	79	71	583.336	0.693	0.354	0.223	0.317	0.294	1	0	0	0	0	0	C2m≠	C2	(a.3.1.3,f.23.11.1)*2+(d.185.1.1,d.185.1.1)*4+(f.21.1.2,f.32.1.1)*2+(f.23.12.1,b.33.1.1)*2+(f.23.13.1)*2+(f.23.14.1)*2+(f.27.1.1)*2+(f.28.1.1)*2
1p9g_1	41	41	12	11	8	1.056	0.632	0.708	0.634	0.823	0.681	0	0	1	1	0	0	A1o	A	(g.3.1.1)*1
1p9h_1	537	537	53	21	21	23.373	1.262	0.593	0.519	0.468	0.573	0	0	1	1	0	0	C3	C3	(b.81.3.1)*3
1p9m_1	1324	1324	92	48	43	189.888	1.011	0.200	0.198	0.036	0.204	1	0	0	0	0	0	C2m≠	C2	(a.26.1.1)*2+(b.1.2.1,b.1.2.1)*2+(b.1.2.1,b.1.2.1,b.1.2.1)*2
1p9y_1	117	117	45	18	12	9.720	1.500	0.457	0.327	0.746	0.409	0	1	0	0	0	0	A1o	A	(d.241.2.1)*1
1pbj_1	120	120	23	20	15	6.900	0.657	0.516	0.430	0.513	0.487	0	0	1	0	0	0	A1o	A	(d.37.1.1)*1
1pby_1	905	905	56	39	30	65.520	0.812	0.464	0.368	0.511	0.429	0	1	0	0	0	0	A3	A	(a.137.9.1)*1+(a.3.1.7,a.3.1.7,b.61.4.1,b.1.18.14,b.1.18.14)*1+(b.69.2.2)*1
1pc6_1	274	274	33	31	19	19.437	0.660	0.360	0.344	0.086	0.353	0	1	0	0	0	0	C2o=	C2	(d.262.1.1)*2
1pcf_1	132	132	28	21	19	11.172	0.700	0.507	0.351	0.594	0.446	0	0	1	0	0	0	C2o=	C2	(d.18.1.1)*2
1pd3_1	54	54	26	13	7	2.366	1.300	0.649	0.545	0.455	0.605	0	0	1	1	0	0	A1o	A	(a.30.3.1)*1
1peu_1	1384	1384	81	41	40	132.840	1.000	0.432	0.316	0.541	0.386	0	1	0	0	0	0	C2m=	C2	(a.98.1.1,c.7.1.2)*2
1pf9_1	8015	8015	131	76	75	746.700	0.868	0.188	0.240	0.007	0.210	1	0	0	0	1	0	A4+	A	(a.129.1.1,d.56.1.1,c.8.5.1)*14+(b.35.1.1)*7
1pfo_1	942	942	81	44	27	96.228	1.141	0.354	0.283	0.245	0.328	1	0	0	0	0	0	C2m=	C2	(f.69.1.1,b.183.1.1)*2
1pfq_1	1453	1453	71	48	39	132.912	0.816	0.386	0.317	0.486	0.369	0	1	0	0	0	0	C2m=	C2	(b.70.3.1,c.69.1.24)*2
1pfv_1	547	547	56	31	25	43.400	1.000	0.510	0.378	0.582	0.456	0	0	1	0	0	0	A1m	A	(c.26.1.1,g.41.1.1,a.27.1.1)*1
1pfx_1	381	381	58	29	26	43.732	1.055	0.298	0.239	0.203	0.270	1	0	0	0	0	0	A2	A	(b.47.1.2)*1+(g.32.1.1,g.3.11.1,g.3.11.1)*1
1phz_1	806	806	51	39	32	63.648	0.718	0.494	0.380	0.390	0.451	0	1	0	0	0	0	C2m=	C2	(d.58.18.3,d.178.1.1)*2
1pi1_1	185	185	33	27	17	15.147	0.750	0.596	0.382	0.603	0.498	0	0	1	0	0	0	A1o	A	(a.29.7.1)*1
1pi2_1	366	366	29	28	28	22.736	0.518	0.277	0.361	0.013	0.318	1	0	0	0	1	0	D3	D3	(g.3.13.1)*6
1pin_1	306	306	37	26	24	23.088	0.740	0.484	0.371	0.135	0.426	0	1	0	0	0	0	C2m=	C2	(b.72.1.1,d.26.1.1)*2
1pix_1	1172	1172	54	51	39	107.406	0.600	0.478	0.327	0.474	0.411	0	1	0	0	0	0	C2m=	C2	(c.14.1.4,c.14.1.4)*2
1pj5_1	3308	3308	84	67	57	320.796	0.677	0.438	0.310	0.377	0.386	0	1	0	0	0	0	D2	D2	(c.3.1.2,d.16.1.5,d.250.1.1,b.44.2.1)*4
1pjc_1	2166	2166	61	56	56	191.296	0.545	0.445	0.320	0.243	0.392	0	1	0	0	0	0	D3	D3	(c.23.12.2,c.2.1.4)*6
1pju_1	115	115	30	16	11	5.280	1.111	0.563	0.471	0.596	0.529	0	0	1	0	0	0	A1m	A	(g.69.1.1,g.69.1.1)*1
1pjx_1	314	314	30	28	23	19.320	0.588	0.597	0.465	0.395	0.545	0	0	1	0	0	0	A1o	A	(b.68.6.1)*1
1pk0_1	1886	1886	68	66	45	201.960	0.613	0.314	0.275	0.085	0.300	1	0	0	0	0	0	C3	C3	(a.39.1.5)*3+(e.41.1.1)*3
1pkp_1	290	290	40	22	20	17.600	0.952	0.569	0.418	0.453	0.499	0	0	1	0	0	0	C2m=	C2	(d.50.1.2,d.14.1.1)*2
1pm3_1	137	137	33	21	14	9.702	0.943	0.586	0.402	0.454	0.503	0	0	1	0	0	0	C2o=	C2	(b.41.1.2)*2
1pmo_1	2743	2743	75	74	49	271.950	0.610	0.487	0.336	0.230	0.423	0	1	0	0	0	0	D3	D3	(c.67.1.6)*6
1pn0_1	1308	1308	58	45	43	112.230	0.659	0.429	0.338	0.351	0.393	0	1	0	0	0	0	C2m=	C2	(c.3.1.2,d.16.1.2,c.47.1.10)*2
1pp0_2	194	194	30	20	16	9.600	0.833	0.604	0.510	0.667	0.569	0	0	1	1	0	0	A1o	A	(d.103.1.1)*1
1pp9_1	4032	4032	100	78	69	538.200	0.680	0.344	0.235	0.233	0.292	1	0	0	0	0	0	C2m≠	C2	(a.3.1.3,f.23.11.1)*2+(d.184.1.3)*2+(d.185.1.1,d.185.1.1)*4+(f.21.1.2,f.32.1.1)*2+(f.23.12.1,b.33.1.1)*2+(f.23.13.1)*2+(f.23.14.1)*2+(f.27.1.1)*2+(f.28.1.1)*2
1ppr_1	936	936	55	55	25	75.625	0.688	0.295	0.298	0.384	0.306	1	0	0	0	1	0	C3	C3	(a.131.1.1,a.131.1.1)*3
1prz_1	252	252	40	27	20	21.600	0.851	0.503	0.342	0.647	0.433	0	0	1	0	0	0	A1o	A	(d.265.1.3)*1
1ps9_1	671	671	48	37	26	46.176	0.762	0.477	0.389	0.505	0.439	0	1	0	0	0	0	A1m	A	(c.1.4.1,c.4.1.1,c.3.1.1)*1
1psr_1	200	200	27	25	19	12.825	0.614	0.529	0.431	0.346	0.495	0	0	1	0	0	0	C2o=	C2	(a.39.1.2)*2
1puc_1	202	202	35	26	19	17.290	0.778	0.377	0.320	0.443	0.356	0	1	0	0	0	0	C2o=	C2	(d.97.1.1)*2
1pv5_1	261	261	35	23	19	15.295	0.833	0.595	0.471	0.673	0.546	0	0	1	0	0	0	A1o	A	(d.251.1.1)*1
1pvm_1	362	362	37	30	23	25.530	0.698	0.561	0.410	0.471	0.494	0	0	1	0	0	0	C2m=	C2	(d.37.1.1,g.41.13.1)*2
1pvv_1	3756	3756	69	69	68	323.748	0.504	0.494	0.355	0.144	0.427	0	1	0	0	0	0	TOI	T	(c.78.1.1,c.78.1.1)*12
1pwu_1	747	747	65	41	31	82.615	0.903	0.384	0.272	0.514	0.334	1	0	0	0	0	0	A1m	A	(d.92.1.14,d.166.1.1,d.92.1.14)*1
1px5_2	341	341	35	28	19	18.620	0.745	0.519	0.469	0.438	0.505	0	0	1	0	0	0	A1m	A	(d.218.1.6,a.160.1.2)*1
1pxv_1	294	294	36	27	26	25.272	0.679	0.482	0.348	0.639	0.432	0	1	0	0	0	0	A2	A	(b.61.2.2)*1+(d.3.1.1)*1
1pyt_1	902	902	54	42	33	74.844	0.720	0.435	0.338	0.565	0.399	0	1	0	0	0	0	A4+	A	(b.47.1.2)*2+(c.56.5.1)*1+(d.58.3.1)*1
1pz4_1	113	113	24	20	14	6.720	0.706	0.538	0.438	0.542	0.496	0	0	1	0	0	0	A1o	A	(d.106.1.1)*1
1pzw_1	160	160	39	22	17	14.586	1.000	0.600	0.358	0.610	0.483	0	0	1	0	0	0	C2o=	C2	(g.39.1.10)*2
1q19_1	2000	2000	66	59	36	140.184	0.695	0.458	0.383	0.207	0.426	0	1	0	0	0	0	D2	D2	(d.153.1.1,c.26.2.1)*4
1q1r_1	421	421	40	36	23	33.120	0.678	0.462	0.356	0.434	0.416	0	1	0	0	0	0	A1m	A	(c.3.1.5,c.3.1.5,d.87.1.1)*1
1q2h_2	126	126	32	19	11	6.688	1.067	0.655	0.515	0.605	0.597	0	0	1	1	0	0	C2o=	C2	(a.34.4.1)*2
1q2l_1	937	937	56	42	37	87.024	0.709	0.195	0.275	0.002	0.239	1	0	0	0	1	0	A1m	A	(d.185.1.1,d.185.1.1,d.185.1.1,d.185.1.1)*1
1q3b_1	259	259	39	26	19	19.266	0.867	0.451	0.354	0.472	0.412	0	1	0	0	0	0	A1m	A	(b.113.1.1,a.156.1.2,g.39.1.8)*1
1q3i_1	192	192	28	22	18	11.088	0.700	0.624	0.472	0.689	0.564	0	0	1	0	0	0	A1o	A	(d.220.1.1)*1
1q3q_1	8288	8288	82	80	79	518.240	0.516	0.147	0.301	0.001	0.214	1	0	0	0	1	0	D4+	D8	(a.129.1.2,d.56.1.2,c.8.5.2)*16
1q3x_1	321	321	47	25	21	24.675	1.022	0.483	0.358	0.536	0.428	0	1	0	0	0	0	A1m	A	(g.18.1.1,b.47.1.2)*1
1q57_1	3381	3381	82	76	62	386.384	0.594	0.130	0.204	0.004	0.172	1	0	0	0	1	0	A4+	A	(e.13.1.2,c.37.1.11)*7
1q5r_1	3290	3290	69	69	60	285.660	0.535	0.391	0.317	0.069	0.348	0	1	0	0	0	0	C4+	C7	(d.153.1.4)*14
1q5x_1	473	473	35	34	21	24.990	0.636	0.448	0.436	0.082	0.438	0	1	0	0	0	0	C3	C3	(c.8.7.1)*3
1q5y_1	329	329	28	25	23	16.100	0.583	0.556	0.500	0.543	0.545	0	0	1	1	0	0	D2	D2	(d.58.18.4)*4
1q5z_1	145	145	25	21	17	8.925	0.658	0.594	0.436	0.488	0.523	0	0	1	0	0	0	A1o	A	(a.196.1.1)*1
1q74_1	287	287	31	27	18	15.066	0.689	0.534	0.474	0.654	0.525	0	0	1	0	0	0	A1o	A	(c.134.1.1)*1
1q7z_1	559	559	47	28	27	35.532	0.855	0.552	0.422	0.584	0.497	0	0	1	0	0	0	A1m	A	(c.1.26.1,c.1.21.2)*1
1q88_2	198	198	31	22	20	13.640	0.738	0.560	0.392	0.520	0.484	0	0	1	0	0	0	A1o	A	(e.47.1.1)*1
1q90_1	1904	1904	76	76	50	288.800	0.603	0.339	0.213	0.474	0.287	1	0	0	0	0	0	C2m≠	C2	(b.2.6.1,b.84.2.2,f.23.23.1)*2+(b.33.1.1)*2+(f.21.1.2)*2+(f.23.12.1)*2+(f.23.24.1)*2+(f.23.25.1)*2+(f.23.26.1)*2+(f.23.27.1)*2+(f.32.1.1)*2
1q9u_1	256	256	27	23	19	11.799	0.643	0.572	0.529	0.421	0.568	0	0	1	1	0	0	C2o=	C2	(d.129.7.1)*2
1qak_1	1442	1442	57	45	42	107.730	0.655	0.525	0.382	0.371	0.461	0	0	1	0	0	0	C2m=	C2	(d.82.1.1,d.17.2.1,d.17.2.1,b.30.2.1)*2
1qb7_1	472	472	34	33	27	30.294	0.567	0.524	0.423	0.616	0.483	0	0	1	0	0	0	C2o=	C2	(c.61.1.1)*2
1qba_1	858	858	50	39	34	66.300	0.685	0.527	0.377	0.583	0.462	0	0	1	0	0	0	A1m	A	(b.2.2.3,d.92.2.1,c.1.8.6,b.1.18.2)*1
1qcs_1	195	195	28	27	19	14.364	0.609	0.568	0.380	0.529	0.477	0	0	1	0	0	0	A1m	A	(b.52.2.3,d.31.1.1)*1
1qd1_1	644	644	56	28	27	42.336	1.018	0.438	0.392	0.446	0.424	0	1	0	0	0	0	C2m=	C2	(d.58.34.1,d.58.34.1)*2
1qd5_1	257	257	32	25	21	16.800	0.696	0.536	0.423	0.419	0.482	0	0	1	0	0	0	A1o	A	(f.4.2.1)*1
1qdm_1	433	433	39	27	26	27.378	0.736	0.540	0.398	0.473	0.475	0	0	1	0	0	0	A1m	A	(a.64.1.2,b.50.1.2)*1
1qex_1	1728	1728	130	39	39	197.730	1.667	0.387	0.265	0.484	0.344	1	0	0	0	0	0	D3	D3	(b.32.1.1)*6
1qh4_1	760	760	57	39	29	64.467	0.838	0.303	0.316	0.227	0.318	0	1	0	0	1	0	C2m=	C2	(a.83.1.1,d.128.1.2)*2
1qhd_1	1191	1191	57	37	36	75.924	0.781	0.503	0.432	0.310	0.471	0	0	1	0	0	0	C3	C3	(a.115.1.2,b.19.1.1)*3
1qhf_1	960	960	53	50	27	71.550	0.688	0.514	0.387	0.143	0.450	0	0	1	0	0	0	D2	D2	(c.60.1.1)*4
1qhv_1	585	585	36	36	29	37.584	0.554	0.584	0.444	0.483	0.525	0	0	1	0	0	0	C3	C3	(b.21.1.1)*3
1qi9_1	1111	1111	57	36	32	65.664	0.838	0.564	0.461	0.562	0.527	0	0	1	0	0	0	C2o=	C2	(a.111.1.2)*2
1qiu_1	792	792	56	38	38	80.864	0.737	0.444	0.290	0.430	0.379	1	0	0	0	0	0	C3	C3	(b.83.1.1,b.21.1.1)*3
1qkd_1	124	124	28	22	18	11.088	0.700	0.520	0.324	0.433	0.423	0	0	1	0	0	0	C2o=	C2	(g.7.1.1)*2
1qks_1	1118	1118	55	39	38	81.510	0.714	0.522	0.376	0.438	0.458	0	0	1	0	0	0	C2m=	C2	(a.3.1.2,b.70.2.1)*2
1qmh_1	669	669	49	32	26	40.768	0.845	0.409	0.404	0.458	0.418	0	1	0	0	0	0	C2m=	C2	(d.68.2.1,c.47.2.1)*2
1qnf_1	475	475	47	31	29	42.253	0.783	0.525	0.353	0.321	0.444	0	0	1	0	0	0	A1m	A	(c.28.1.1,a.99.1.1)*1
1qo8_1	1128	1128	63	47	40	118.440	0.724	0.394	0.279	0.539	0.347	1	0	0	0	0	0	C2m=	C2	(a.138.1.3,c.3.1.4,d.168.1.1)*2
1qqg_1	417	417	72	25	19	34.200	1.636	0.466	0.354	0.485	0.426	0	1	0	0	0	0	C2m=	C2	(b.55.1.2,b.55.1.2)*2
1qr0_1	228	228	38	23	19	16.606	0.905	0.459	0.366	0.613	0.426	0	1	0	0	0	0	A1m	A	(d.150.1.1,d.150.1.1)*1
1qsa_1	618	618	45	42	29	54.810	0.634	0.264	0.293	0.037	0.283	1	0	0	0	1	0	A1m	A	(a.118.5.1,d.2.1.6)*1
1qsd_1	204	204	44	21	13	12.012	1.294	0.512	0.422	0.428	0.472	0	0	1	0	0	0	C2o=	C2	(a.7.5.1)*2
1qsm_1	600	600	45	40	25	45.000	0.692	0.447	0.375	0.359	0.431	0	1	0	0	0	0	D2	D2	(d.108.1.1)*4
1qts_1	247	247	39	22	17	14.586	1.000	0.527	0.427	0.579	0.489	0	0	1	0	0	0	A1m	A	(b.1.10.1,d.105.1.1)*1
1qup_1	440	440	45	32	31	44.640	0.714	0.472	0.293	0.494	0.392	1	0	0	0	0	0	C2m=	C2	(d.58.17.1,b.1.8.1)*2
1quq_1	469	469	51	34	29	50.286	0.810	0.469	0.299	0.621	0.398	1	0	0	0	0	0	A4+	A	(b.40.4.3)*4
1qv9_1	1692	1692	57	56	41	130.872	0.588	0.558	0.385	0.296	0.476	0	0	1	0	0	0	D3	D3	(c.127.1.1)*6
1qw2_1	408	408	39	28	20	21.840	0.812	0.602	0.471	0.578	0.539	0	0	1	0	0	0	D2	D2	(d.249.1.1)*4
1qw9_1	2982	2982	67	66	58	256.476	0.540	0.380	0.322	0.150	0.363	0	1	0	0	0	0	D3	D3	(b.71.1.2,c.1.8.3)*6
1qxp_2	788	788	59	41	28	67.732	0.855	0.453	0.334	0.462	0.402	0	1	0	0	0	0	A1m	A	(d.3.1.3,b.14.1.1,a.39.1.8,a.39.1.8)*1
1qyn_1	535	535	43	31	30	39.990	0.705	0.558	0.388	0.422	0.477	0	0	1	0	0	0	D2	D2	(d.33.1.1)*4
1qz1_1	576	576	77	52	26	104.104	0.987	0.210	0.158	0.022	0.181	1	0	0	0	0	0	C2m=	C2	(b.1.1.4,b.1.1.4,b.1.1.4)*2
1qzu_3	160	160	27	20	19	10.260	0.692	0.582	0.394	0.391	0.492	0	0	1	0	0	0	A1o	A	(c.34.1.1)*1
1r0d_1	194	194	44	20	14	12.320	1.294	0.615	0.437	0.569	0.534	0	0	1	0	0	0	A1o	A	(a.216.1.1)*1
1r0k_1	762	762	65	39	31	78.585	0.929	0.462	0.293	0.586	0.387	1	0	0	0	0	0	C2m=	C2	(c.2.1.3,d.81.1.3,a.69.3.1)*2
1r0r_1	325	325	30	24	21	15.120	0.667	0.601	0.499	0.630	0.565	0	0	1	0	0	0	A2	A	(c.41.1.1)*1+(g.68.1.1)*1
1r0v_1	488	488	47	32	23	34.592	0.855	0.536	0.427	0.479	0.493	0	0	1	0	0	0	C2m=	C2	(c.52.2.1,d.75.1.1,c.52.2.1)*2
1r11_1	606	606	60	31	23	42.780	1.111	0.535	0.421	0.550	0.495	0	0	1	0	0	0	C2m=	C2	(d.75.1.1,c.52.2.1,d.75.1.1,c.52.2.1)*2
1r29_1	244	244	38	29	16	17.632	0.844	0.571	0.417	0.435	0.509	0	0	1	0	0	0	C2o=	C2	(d.42.1.1)*2
1r2j_1	353	353	40	29	22	25.520	0.784	0.553	0.372	0.656	0.471	0	0	1	0	0	0	A1m	A	(e.6.1.1,a.29.3.1)*1
1r3f_1	278	278	44	31	20	27.280	0.863	0.507	0.313	0.591	0.423	0	0	1	0	0	0	A1m	A	(d.265.1.2,b.122.1.1)*1
1r6b_1	704	704	79	39	36	110.916	1.053	0.265	0.193	0.133	0.234	1	0	0	0	0	0	A1m	A	(a.174.1.1,c.37.1.20,c.37.1.20)*1
1r6j_1	82	82	20	16	12	3.840	0.714	0.604	0.486	0.449	0.553	0	0	1	0	0	0	A1o	A	(b.36.1.1)*1
1r6l_1	1416	1416	50	49	36	88.200	0.588	0.341	0.372	0.279	0.370	0	1	0	0	1	0	D3	D3	(d.14.1.4,d.101.1.1)*6
1r6o_1	236	236	36	22	21	16.632	0.837	0.513	0.392	0.604	0.467	0	0	1	0	0	0	A2	A	(a.174.1.1)*1+(d.45.1.2)*1
1r6t_1	802	802	76	39	28	82.992	1.134	0.490	0.312	0.518	0.409	0	1	0	0	0	0	C2m≠	C2	(a.16.1.3,c.26.1.1)*1+(c.26.1.1)*1
1r6x_1	386	386	39	27	23	24.219	0.780	0.509	0.421	0.617	0.479	0	0	1	0	0	0	A1m	A	(b.122.1.3,c.26.1.5)*1
1r75_1	110	110	29	19	12	6.612	0.935	0.590	0.445	0.535	0.530	0	0	1	0	0	0	A1o	A	(b.134.1.1)*1
1r7a_1	1008	1008	65	35	31	70.525	0.985	0.476	0.392	0.280	0.443	0	1	0	0	0	0	C2m=	C2	(c.1.8.1,b.71.1.1)*2
1r7l_1	212	212	44	26	20	22.880	0.957	0.494	0.294	0.686	0.404	1	0	0	0	0	0	C2o=	C2	(d.277.1.1)*2
1r89_1	874	874	78	38	37	109.668	1.040	0.236	0.234	0.017	0.236	1	0	0	0	0	0	C2m=	C2	(d.218.1.7,a.160.1.3,d.58.16.2)*2
1r8g_1	710	710	48	32	28	43.008	0.800	0.496	0.429	0.454	0.471	0	1	0	0	0	0	C2o=	C2	(d.128.1.3)*2
1r8h_1	174	174	36	24	20	17.280	0.818	0.493	0.310	0.693	0.408	0	1	0	0	0	0	C2o=	C2	(d.58.8.1)*2
1r8i_1	187	187	47	19	14	12.502	1.424	0.518	0.380	0.720	0.462	0	0	1	0	0	0	A1o	A	(a.8.7.1)*1
1r8j_1	536	536	45	40	27	48.600	0.672	0.471	0.326	0.609	0.408	0	1	0	0	0	0	C2m=	C2	(c.23.1.5,a.186.1.1)*2
1r8q_2	373	373	46	31	23	32.798	0.852	0.447	0.337	0.476	0.401	0	1	0	0	0	0	A2	A	(a.118.3.1)*1+(c.37.1.8)*1
1rc9_1	221	221	34	21	20	14.280	0.829	0.534	0.409	0.660	0.486	0	0	1	0	0	0	A1m	A	(d.111.1.1,g.19.1.2)*1
1rcq_1	714	714	46	31	29	41.354	0.767	0.525	0.445	0.503	0.498	0	0	1	0	0	0	C2m=	C2	(b.49.2.2,c.1.6.1)*2
1rcu_1	680	680	38	37	27	37.962	0.594	0.535	0.435	0.445	0.492	0	0	1	0	0	0	D2	D2	(c.129.1.1)*4
1rdz_1	1348	1348	67	49	39	128.037	0.761	0.507	0.335	0.422	0.435	0	0	1	0	0	0	D2	D2	(e.7.1.1)*4
1reg_1	242	242	41	24	23	22.632	0.872	0.496	0.335	0.600	0.428	0	1	0	0	0	0	C2o=	C2	(d.58.27.1)*2
1rfx_1	267	267	48	23	20	22.080	1.116	0.514	0.343	0.573	0.437	0	0	1	0	0	0	C3	C3	(g.77.1.1)*3
1rfz_1	643	643	36	32	31	35.712	0.571	0.546	0.467	0.340	0.515	0	0	1	0	0	0	D2	D2	(a.195.1.1)*4
1rg8_1	141	141	19	18	17	5.814	0.543	0.587	0.557	0.419	0.579	0	0	1	1	0	0	A1o	A	(b.42.1.1)*1
1rh1_1	490	490	67	25	24	40.200	1.367	0.387	0.300	0.392	0.342	0	1	0	0	0	0	A1m	A	(b.110.1.1,f.1.1.1)*1
1rhs_1	293	293	31	22	21	14.322	0.721	0.600	0.512	0.648	0.572	0	0	1	1	0	0	A1m	A	(c.46.1.2,c.46.1.2)*1
1rhy_1	540	540	45	45	25	50.625	0.643	0.527	0.333	0.532	0.441	0	0	1	0	0	0	C3	C3	(d.14.1.9,d.14.1.9)*3
1rhz_1	529	529	52	33	31	53.196	0.812	0.475	0.308	0.559	0.400	0	1	0	0	0	0	A3	A	(f.17.6.1)*1+(f.23.28.1)*1+(f.41.1.1)*1
1ris_1	388	388	35	31	22	23.870	0.660	0.425	0.420	0.059	0.417	0	1	0	0	0	0	D2	D2	(d.58.14.1)*4
1rju_1	36	36	13	9	9	1.053	0.722	0.678	0.563	0.721	0.630	0	0	1	1	0	0	A1o	A	(g.46.1.1)*1
1rk8_1	247	247	31	27	19	15.903	0.674	0.543	0.425	0.486	0.496	0	0	1	0	0	0	A3	A	(b.72.3.1)*1+(d.232.1.1)*1+(d.58.7.1)*1
1rke_1	438	438	63	37	25	58.275	1.016	0.402	0.240	0.487	0.330	1	0	0	0	0	0	A2	A	(a.24.9.1)*1+(a.24.9.1,a.24.9.1)*1
1rki_1	101	101	27	17	13	5.967	0.900	0.599	0.450	0.663	0.538	0	0	1	0	0	0	A1o	A	(d.308.1.2)*1
1rl2_2	137	137	25	17	14	5.950	0.806	0.594	0.516	0.360	0.559	0	0	1	1	0	0	A1m	A	(b.40.4.5,b.34.5.3)*1
1rl6_1	164	164	40	22	15	13.200	1.081	0.417	0.325	0.466	0.380	0	1	0	0	0	0	A1m	A	(d.141.1.1,d.141.1.1)*1
1rlb_1	834	834	63	41	36	92.988	0.818	0.448	0.277	0.532	0.372	1	0	0	0	0	0	C2o≠	C2	(b.3.4.1)*4+(b.60.1.1)*2
1rlh_1	151	151	34	25	16	13.600	0.829	0.433	0.298	0.539	0.379	1	0	0	0	0	0	A1o	A	(d.256.1.1)*1
1rlr_1	737	737	52	38	29	57.304	0.776	0.445	0.361	0.288	0.412	0	1	0	0	0	0	A1m	A	(a.98.1.1,c.7.1.2)*1
1rmd_1	232	232	48	26	25	31.200	0.941	0.467	0.242	0.581	0.358	1	0	0	0	0	0	C2m=	C2	(g.44.1.1,g.37.1.1)*2
1ro2_1	210	210	29	24	18	12.528	0.690	0.534	0.449	0.611	0.507	0	0	1	0	0	0	A1o	A	(d.264.1.2)*1
1rp0_1	2224	2224	57	56	49	156.408	0.543	0.388	0.394	0.116	0.410	0	1	0	0	1	0	D4+	D4	(c.3.1.6)*8
1rp3_1	312	312	41	27	21	23.247	0.854	0.535	0.365	0.520	0.457	0	0	1	0	0	0	A2	A	(a.137.11.1)*1+(a.177.1.1,a.4.13.1,a.4.13.2)*1
1rp4_1	374	374	40	30	25	30.000	0.727	0.541	0.368	0.639	0.462	0	0	1	0	0	0	A1o	A	(a.227.1.1)*1
1rp5_1	687	687	58	37	29	62.234	0.879	0.465	0.309	0.613	0.396	0	1	0	0	0	0	A1m	A	(d.175.1.1,e.3.1.1,d.11.1.1,d.11.1.1)*1
1rpo_1	122	122	36	13	12	5.616	1.440	0.610	0.542	0.442	0.585	0	0	1	1	0	0	C2o=	C2	(a.30.1.1)*2
1rqb_1	944	944	58	35	33	66.990	0.853	0.445	0.379	0.439	0.423	0	1	0	0	0	0	C2m=	C2	(c.1.10.5,a.5.7.2)*2
1rqg_1	1212	1212	52	46	42	100.464	0.591	0.484	0.362	0.455	0.432	0	1	0	0	0	0	C2m=	C2	(c.26.1.1,g.41.1.1,a.27.1.1)*2
1rr7_1	94	94	26	19	14	6.916	0.788	0.226	0.274	0.084	0.249	1	0	0	0	1	0	A1o	A	(a.4.1.14)*1
1rrk_1	480	480	54	27	23	33.534	1.080	0.492	0.389	0.475	0.455	0	1	0	0	0	0	A1m	A	(c.62.1.1,b.47.1.2)*1
1rss_1	140	140	36	20	16	11.520	1.000	0.473	0.347	0.700	0.425	0	1	0	0	0	0	A1o	A	(a.75.1.1)*1
1rtm_1	447	447	42	40	39	65.520	0.532	0.379	0.210	0.470	0.299	1	0	0	0	0	0	C3	C3	(h.1.1.1,d.169.1.1)*3
1rtq_1	291	291	27	24	19	12.312	0.628	0.606	0.549	0.606	0.589	0	0	1	1	0	0	A1o	A	(c.56.5.4)*1
1rut_1	157	157	46	16	13	9.568	1.586	0.471	0.393	0.417	0.442	0	1	0	0	0	0	A1m	A	(g.39.1.3,g.39.1.3,g.39.1.3,g.39.1.3)*1
1rvk_1	381	381	33	26	22	18.876	0.688	0.501	0.487	0.370	0.500	0	0	1	0	0	0	A1m	A	(d.54.1.1,c.1.11.2)*1
1rvv_1	4620	4620	87	74	70	450.660	0.604	0.085	0.208	0.000	0.149	1	0	0	0	1	0	C2o=	C2	(c.16.1.1)*30
1rwa_1	754	754	52	34	29	51.272	0.825	0.514	0.396	0.563	0.470	0	0	1	0	0	0	A1m	A	(a.102.3.2,b.30.5.2,b.24.1.1)*1
1rwt_1	13086	13086	134	133	133	2370.326	0.504	0.000	0.089	0.000	0.048	1	0	0	0	1	0	A4+	A	(f.43.1.1)*60
1rwz_1	732	732	47	46	23	49.726	0.681	0.281	0.347	0.002	0.310	1	0	0	0	1	0	C3	C3	(d.131.1.2,d.131.1.2)*3
1rya_1	320	320	39	24	20	18.720	0.886	0.560	0.469	0.466	0.532	0	0	1	0	0	0	C2o=	C2	(d.113.1.5)*2
1ryl_1	157	157	27	19	17	8.721	0.750	0.603	0.488	0.541	0.558	0	0	1	0	0	0	A1o	A	(d.276.1.1)*1
1rzm_1	1352	1352	61	54	41	135.054	0.642	0.413	0.299	0.481	0.363	1	0	0	0	0	0	D2	D2	(c.1.10.4)*4
1s0p_1	352	352	42	30	18	22.680	0.875	0.526	0.438	0.411	0.497	0	0	1	0	0	0	C2o=	C2	(a.192.1.1)*2
1s16_1	380	380	46	37	24	40.848	0.754	0.434	0.282	0.487	0.368	1	0	0	0	0	0	A1m	A	(d.122.1.2,d.14.1.3)*1
1s1m_1	2140	2140	82	74	39	236.652	0.726	0.403	0.269	0.351	0.344	1	0	0	0	0	0	D2	D2	(c.37.1.10,c.23.16.1)*4
1s2d_1	998	998	42	41	32	55.104	0.575	0.562	0.479	0.405	0.531	0	0	1	0	0	0	D3	D3	(c.23.14.1)*6
1s2e_1	864	864	56	34	34	64.736	0.824	0.528	0.387	0.247	0.466	0	0	1	0	0	0	C3	C3	(b.32.1.1)*3
1s2x_1	180	180	41	18	13	9.594	1.323	0.544	0.450	0.736	0.509	0	0	1	0	0	0	A1o	A	(a.47.3.1)*1
1s4m_1	277	277	39	26	20	20.280	0.848	0.542	0.390	0.494	0.476	0	0	1	0	0	0	A1m	A	(c.26.1.3,b.43.5.1)*1
1s5e_1	746	746	46	37	36	61.272	0.630	0.498	0.357	0.574	0.436	0	1	0	0	0	0	A4+	A	(b.40.2.1)*5+(d.166.1.1)*1
1s6v_1	402	402	41	29	23	27.347	0.788	0.518	0.418	0.535	0.482	0	0	1	0	0	0	A2	A	(a.3.1.1)*1+(a.93.1.1)*1
1s70_1	600	600	50	41	30	61.500	0.704	0.452	0.306	0.548	0.392	0	1	0	0	0	0	A2	A	(d.159.1.3)*1+(d.211.1.1)*1
1s7m_1	472	472	41	29	28	33.292	0.719	0.528	0.364	0.474	0.452	0	0	1	0	0	0	C3	C3	(b.144.1.1)*3
1s99_1	366	366	33	27	22	19.602	0.673	0.572	0.477	0.392	0.533	0	0	1	0	0	0	C2o=	C2	(d.58.48.2)*2
1s9r_1	818	818	57	37	26	54.834	0.905	0.561	0.430	0.511	0.504	0	0	1	0	0	0	C2o=	C2	(d.126.1.4)*2
1s9u_1	201	201	28	26	18	13.104	0.636	0.591	0.445	0.618	0.535	0	0	1	0	0	0	A1o	A	(a.184.1.1)*1
1sbs_1	884	884	70	43	34	102.340	0.909	0.371	0.263	0.462	0.328	1	0	0	0	0	0	C2m=	C2	(b.1.1.1,b.1.1.2)*4
1sby_1	508	508	41	29	21	24.969	0.820	0.578	0.498	0.594	0.549	0	0	1	0	0	0	C2o=	C2	(c.2.1.2)*2
1sc0_1	137	137	28	16	15	6.720	0.903	0.596	0.474	0.583	0.543	0	0	1	0	0	0	A1o	A	(d.38.1.5)*1
1scz_1	5592	5592	86	85	84	614.040	0.509	0.155	0.230	0.001	0.200	1	0	0	0	1	0	TOI	O	(c.43.1.1)*24
1sdd_1	869	869	57	43	33	80.883	0.750	0.453	0.320	0.551	0.397	0	1	0	0	0	0	A2	A	(b.6.1.3,b.6.1.3)*1+(b.6.1.3,b.6.1.3,b.18.1.2,b.18.1.2)*1
1sdi_1	213	213	28	23	23	14.812	0.609	0.586	0.405	0.519	0.507	0	0	1	0	0	0	A1o	A	(a.198.1.1)*1
1sed_1	334	334	44	44	29	56.144	0.603	0.345	0.204	0.472	0.289	1	0	0	0	0	0	C3	C3	(a.219.1.1)*3
1sei_1	260	260	57	25	21	29.925	1.239	0.440	0.283	0.518	0.380	1	0	0	0	0	0	C2o=	C2	(d.140.1.1)*2
1ses_1	842	842	67	60	37	148.740	0.691	0.225	0.168	0.357	0.204	1	0	0	0	0	0	C2m=	C2	(a.2.7.1,d.104.1.1)*2
1sf8_1	236	236	33	29	18	17.226	0.702	0.530	0.375	0.539	0.464	0	0	1	0	0	0	C2o=	C2	(d.271.1.1)*2
1sf9_1	118	118	26	24	18	11.232	0.619	0.347	0.275	0.290	0.318	1	0	0	0	0	0	A1o	A	(b.34.15.1)*1
1sfk_2	277	277	42	21	20	17.640	1.024	0.583	0.429	0.463	0.511	0	0	1	0	0	0	D2	D2	(a.190.1.1)*4
1sfp_1	222	222	32	29	17	15.776	0.696	0.534	0.400	0.418	0.478	0	0	1	0	0	0	C2o=	C2	(b.23.1.1)*2
1sg1_1	361	361	52	31	21	33.852	1.000	0.416	0.292	0.451	0.359	1	0	0	0	0	0	A3	A	(g.17.1.3)*2+(g.24.1.1,g.24.1.1,g.24.1.1,g.24.1.1)*1
1sg2_1	392	392	48	28	27	36.288	0.873	0.122	0.231	0.000	0.179	1	0	0	0	1	0	C3	C3	(f.48.1.1)*3
1sg3_1	1902	1902	60	60	45	162.000	0.571	0.296	0.320	0.010	0.306	1	0	0	0	1	0	D3	D3	(b.18.1.22,b.18.1.22)*6
1sgp_1	236	236	29	23	16	10.672	0.744	0.599	0.496	0.674	0.556	0	0	1	0	0	0	A2	A	(b.47.1.1)*1+(g.68.1.1)*1
1shs_1	2760	2760	60	59	59	208.860	0.508	0.000	0.234	0.000	0.130	1	0	0	0	1	0	TOI	O	(b.15.1.1)*24
1shy_1	727	727	59	42	34	84.252	0.776	0.431	0.276	0.384	0.360	1	0	0	0	0	0	A2	A	(b.47.1.2)*1+(b.69.12.1,g.16.2.1)*1
1sj1_1	132	132	30	17	14	7.140	0.968	0.479	0.420	0.532	0.466	0	1	0	0	0	0	C2o=	C2	(d.58.1.4)*2
1sjw_1	568	568	42	32	32	43.008	0.656	0.498	0.399	0.330	0.467	0	1	0	0	0	0	D2	D2	(d.17.4.9)*4
1skv_1	125	125	36	14	13	6.552	1.333	0.599	0.499	0.411	0.559	0	0	1	0	0	0	C2o=	C2	(a.30.5.1)*2
1skz_1	208	208	39	22	20	17.160	0.929	0.524	0.332	0.479	0.425	0	0	1	0	0	0	C2m=	C2	(g.3.15.1,g.3.15.1)*2
1slm_1	452	452	44	31	28	38.192	0.746	0.433	0.331	0.509	0.396	0	1	0	0	0	0	C2m=	C2	(a.20.1.2,d.92.1.11)*2
1slq_1	805	805	46	40	38	69.920	0.590	0.377	0.312	0.531	0.360	0	1	0	0	0	0	C3	C3	(f.47.1.1)*3
1snn_1	438	438	35	27	23	21.735	0.700	0.553	0.508	0.361	0.543	0	0	1	1	0	0	C2o=	C2	(d.115.1.2)*2
1sox_1	921	921	62	39	32	77.376	0.873	0.525	0.347	0.593	0.443	0	0	1	0	0	0	C2m=	C2	(d.120.1.1,d.176.1.1,b.1.18.6)*2
1sq0_1	463	463	39	34	22	29.172	0.696	0.495	0.416	0.525	0.468	0	1	0	0	0	0	A2	A	(c.10.2.7)*1+(c.62.1.1)*1
1sq2_1	241	241	38	23	15	13.110	1.000	0.592	0.459	0.532	0.535	0	0	1	0	0	0	A2	A	(b.1.1.1)*1+(d.2.1.2)*1
1sqg_1	424	424	41	29	24	28.536	0.774	0.479	0.395	0.486	0.445	0	1	0	0	0	0	A1m	A	(a.79.1.3,c.66.1.38)*1
1sqj_1	1541	1541	101	39	33	129.987	1.403	0.446	0.326	0.531	0.399	0	1	0	0	0	0	C2m=	C2	(b.69.13.1,b.69.13.1)*2
1sqq_1	4208	4208	99	79	70	547.470	0.664	0.376	0.247	0.301	0.312	1	0	0	0	0	0	C2m≠	C2	(a.3.1.3,f.23.11.0)*2+(d.184.1.3)*2+(d.185.1.1,d.185.1.0)*2+(d.185.1.1,d.185.1.1)*2+(f.21.1.2,f.32.1.0)*2+(f.23.12.0,b.33.1.1)*2+(f.23.13.1)*2+(f.23.14.1)*2+(f.23.15.1)*2+(f.27.1.1)*2+(f.28.1.1)*2
1squ_1	306	306	34	24	23	18.768	0.723	0.556	0.429	0.469	0.504	0	0	1	0	0	0	C2o=	C2	(d.252.1.1)*2
1sr4_1	579	579	40	35	31	43.400	0.606	0.541	0.380	0.581	0.468	0	0	1	0	0	0	A3	A	(b.42.2.1)*2+(d.151.1.1)*1
1sr8_1	282	282	35	26	19	17.290	0.778	0.520	0.426	0.465	0.481	0	0	1	0	0	0	A1o	A	(e.54.1.1)*1
1srq_1	634	634	68	36	29	70.992	1.046	0.258	0.241	0.120	0.254	1	0	0	0	0	0	C2o=	C2	(e.55.1.1)*2
1ssm_1	1440	1440	63	34	34	72.828	0.926	0.522	0.495	0.176	0.517	0	0	1	0	0	0	D3	D3	(b.81.1.6)*6
1st6_1	1049	1049	64	61	35	136.640	0.667	0.370	0.235	0.421	0.309	1	0	0	0	0	0	A1m	A	(a.24.9.1,a.24.9.1,a.24.9.1,a.24.9.1,a.24.9.1,a.24.9.1,a.24.9.1,a.24.9.1)*1
1su3_2	416	416	43	32	24	33.024	0.768	0.490	0.358	0.580	0.433	0	1	0	0	0	0	A1m	A	(a.20.1.2,d.92.1.11,b.66.1.1)*1
1sum_1	225	225	38	24	16	14.592	0.950	0.518	0.404	0.676	0.471	0	0	1	0	0	0	A1o	A	(a.7.12.1)*1
1suw_1	996	996	58	52	41	123.656	0.624	0.452	0.260	0.372	0.363	1	0	0	0	0	0	D2	D2	(e.52.1.1)*4
1svd_1	553	553	50	34	28	47.600	0.806	0.527	0.344	0.653	0.445	0	0	1	0	0	0	A2	A	(d.58.9.1,c.1.14.1)*1+(d.73.1.1)*1
1syx_1	197	197	34	21	17	12.138	0.895	0.580	0.459	0.661	0.528	0	0	1	0	0	0	A2	A	(c.47.1.8)*1+(d.76.1.1)*1
1sz6_1	1024	1024	91	33	25	75.075	1.569	0.523	0.379	0.663	0.460	0	0	1	0	0	0	C2m≠	C2	(b.42.2.1,b.42.2.1)*2+(d.165.1.1)*2
1szh_1	147	147	28	20	17	9.520	0.757	0.519	0.400	0.609	0.472	0	0	1	0	0	0	A1o	A	(a.226.1.1)*1
1szi_1	194	194	43	20	16	13.760	1.194	0.416	0.359	0.484	0.400	0	1	0	0	0	0	A1o	A	(a.24.23.1)*1
1szq_1	946	946	70	40	30	84.000	1.000	0.514	0.348	0.439	0.443	0	0	1	0	0	0	C2o=	C2	(e.44.1.1)*2
1t07_1	81	81	26	16	14	5.824	0.867	0.566	0.397	0.665	0.497	0	0	1	0	0	0	A1o	A	(d.279.1.1)*1
1t0b_2	964	964	50	44	35	77.000	0.633	0.580	0.393	0.369	0.489	0	0	1	0	0	0	D2	D2	(c.23.16.6)*4
1t0h_1	283	283	41	30	23	28.290	0.774	0.375	0.277	0.471	0.336	1	0	0	0	0	0	A2	A	(b.34.2.1)*1+(c.37.1.1)*1
1t11_1	750	750	71	36	30	76.680	1.076	0.334	0.267	0.579	0.317	1	0	0	0	0	0	C2m=	C2	(d.241.2.1,d.26.1.1,a.223.1.1)*2
1t1d_1	400	400	32	31	26	25.792	0.561	0.522	0.439	0.188	0.486	0	0	1	0	0	0	C4+	C4	(d.42.1.2)*4
1t1e_1	534	534	43	32	25	34.400	0.754	0.558	0.408	0.600	0.496	0	0	1	0	0	0	A1m	A	(d.58.3.2,c.41.1.2)*1
1t35_1	1442	1442	51	48	41	100.368	0.573	0.342	0.343	0.120	0.349	0	1	0	0	1	0	D4+	D4	(c.129.1.1)*8
1t3g_1	303	303	41	23	20	18.860	0.953	0.540	0.469	0.642	0.525	0	0	1	0	0	0	C2o=	C2	(c.23.2.0)*2
1t4b_1	734	734	52	31	26	41.912	0.912	0.553	0.460	0.568	0.524	0	0	1	0	0	0	C2m=	C2	(c.2.1.3,d.81.1.1)*2
1t4o_2	88	88	29	14	12	4.872	1.115	0.604	0.445	0.735	0.537	0	0	1	0	0	0	A1o	A	(d.50.1.1)*1
1t5e_1	3003	3003	139	72	67	670.536	1.000	0.216	0.129	0.029	0.168	1	0	0	0	0	0	A4+	A	(f.46.1.1)*13
1t60_2	1349	1349	50	35	34	59.500	0.725	0.545	0.536	0.302	0.543	0	0	1	1	0	0	D3	D3	(d.169.1.6,d.169.1.6)*6
1t6a_1	124	124	54	20	18	19.440	1.421	0.220	0.165	0.396	0.201	1	0	0	0	0	0	A1o	A	(d.129.8.1)*1
1t6b_1	846	846	74	40	29	85.840	1.072	0.388	0.284	0.250	0.342	1	0	0	0	0	0	A2	A	(b.179.1.1,f.60.1.1)*1+(c.62.1.1)*1
1t6g_1	550	550	43	33	23	32.637	0.768	0.527	0.417	0.626	0.486	0	0	1	0	0	0	A2	A	(b.29.1.11)*1+(b.50.1.2)*1
1t6l_1	498	498	58	31	22	39.556	1.094	0.389	0.328	0.199	0.362	0	1	0	0	0	0	C2m=	C2	(d.131.1.2,d.131.1.2)*2
1t6s_1	324	324	56	28	20	31.360	1.167	0.354	0.280	0.392	0.323	1	0	0	0	0	0	C2m=	C2	(a.4.5.60,a.4.5.60)*2
1t6u_2	699	699	38	36	31	42.408	0.567	0.461	0.444	0.036	0.455	0	1	0	0	0	0	D3	D3	(a.24.22.1)*6
1t77_1	414	414	38	29	28	30.856	0.667	0.515	0.394	0.555	0.469	0	0	1	0	0	0	A1m	A	(b.55.1.6,a.169.1.1)*1
1t92_1	216	216	27	23	20	12.420	0.628	0.545	0.428	0.515	0.497	0	0	1	0	0	0	C2o=	C2	(d.24.1.3)*2
1t95_1	230	230	48	27	19	24.624	1.043	0.331	0.265	0.225	0.305	1	0	0	0	0	0	A1m	A	(d.235.1.2,a.5.8.1,d.58.11.3)*1
1t98_1	526	526	42	38	35	55.860	0.575	0.440	0.296	0.403	0.376	1	0	0	0	0	0	C2m=	C2	(a.4.5.65,a.47.6.1)*2
1t9g_1	1960	1960	71	56	50	198.800	0.670	0.409	0.283	0.523	0.350	1	0	0	0	0	0	A4+	A	(c.26.2.3)*2+(e.6.1.1,a.29.3.1)*4
1t9h_1	287	287	47	32	20	30.080	0.904	0.498	0.300	0.662	0.405	0	1	0	0	0	0	A1m	A	(b.40.4.5,c.37.1.8)*1
1tad_1	318	318	35	29	19	19.285	0.729	0.520	0.442	0.422	0.490	0	0	1	0	0	0	A1m	A	(c.37.1.8,a.66.1.1)*1
1taf_1	276	276	35	33	21	24.255	0.648	0.263	0.273	0.008	0.265	1	0	0	0	1	0	C2o=	C2	(a.22.1.3)*4
1taq_1	807	807	75	39	33	96.525	1.042	0.301	0.244	0.250	0.279	1	0	0	0	0	0	A1m	A	(c.120.1.2,a.60.7.1,c.55.3.5,e.8.1.1)*1
1tbg_1	1623	1623	74	71	38	199.652	0.679	0.423	0.267	0.138	0.352	1	0	0	0	0	0	D2	D2	(a.137.3.1)*4+(b.69.4.1)*4
1tco_1	628	628	58	38	23	50.692	0.951	0.506	0.377	0.522	0.455	0	0	1	0	0	0	A3	A	(a.39.1.5)*1+(d.159.1.3)*1+(d.26.1.1)*1
1td6_1	286	286	34	25	21	17.850	0.739	0.488	0.409	0.225	0.449	0	1	0	0	0	0	A1o	A	(a.234.1.1)*1
1tdj_1	988	988	48	45	32	69.120	0.623	0.453	0.370	0.486	0.424	0	1	0	0	0	0	C2m=	C2	(c.79.1.1,d.58.18.2,d.58.18.2)*2
1tdq_1	397	397	65	30	20	39.000	1.300	0.353	0.276	0.570	0.327	1	0	0	0	0	0	A2	A	(b.1.2.1,b.1.2.1,b.1.2.1)*1+(d.169.1.1)*1
1te0_1	954	954	58	57	30	99.180	0.667	0.438	0.281	0.386	0.372	1	0	0	0	0	0	C3	C3	(b.47.1.1,b.36.1.4)*3
1te1_1	464	464	40	29	24	27.840	0.755	0.508	0.424	0.413	0.473	0	0	1	0	0	0	A2	A	(b.29.1.11)*1+(c.1.8.5)*1
1tej_1	125	125	37	22	15	12.210	1.000	0.239	0.223	0.036	0.225	1	0	0	0	0	0	C2o=	C2	(g.20.1.1)*2
1tf5_1	775	775	63	46	31	89.838	0.818	0.383	0.261	0.567	0.335	1	0	0	0	0	0	A1m	A	(c.37.1.19,a.162.1.1,c.37.1.19,a.172.1.1)*1
1tfe_1	284	284	46	31	28	39.928	0.780	0.358	0.221	0.208	0.291	1	0	0	0	0	0	C2o=	C2	(d.43.1.1)*2
1tg8_1	780	780	103	29	22	65.714	2.020	0.441	0.334	0.490	0.399	0	1	0	0	0	1	C2m=	C2	(f.10.1.1,b.1.18.4)*2
1tgr_1	52	52	19	13	10	2.470	0.826	0.509	0.444	0.674	0.485	0	0	1	0	0	0	A1o	A	(g.1.1.1)*1
1th7_1	1092	1092	52	35	34	61.880	0.754	0.405	0.400	0.011	0.387	0	1	0	0	0	0	D4+	D7	(b.38.1.1)*14
1tid_1	507	507	53	33	24	41.976	0.930	0.423	0.333	0.301	0.384	0	1	0	0	0	0	C2o≠	C2	(c.13.2.1)*2+(d.122.1.3)*2
1tif_1	76	76	27	15	12	4.860	1.000	0.562	0.430	0.597	0.514	0	0	1	0	0	0	A1o	A	(d.15.8.1)*1
1tig_1	88	88	23	15	11	3.795	0.885	0.604	0.528	0.442	0.568	0	0	1	1	0	0	A1o	A	(d.68.1.1)*1
1tj7_1	906	906	68	56	42	159.936	0.694	0.301	0.180	0.443	0.244	1	0	0	0	0	0	C2o=	C2	(a.127.1.1)*2
1tjf_2	186	186	33	18	15	8.910	1.000	0.610	0.521	0.537	0.581	0	0	1	1	0	0	A1o	A	(a.192.1.1)*1
1tjl_1	145	145	37	25	16	14.800	0.902	0.365	0.278	0.230	0.328	1	0	0	0	0	0	A1m	A	(a.2.14.1,g.39.1.13)*1
1tjx_1	157	157	29	18	16	8.352	0.853	0.577	0.478	0.641	0.543	0	0	1	0	0	0	A1o	A	(b.7.1.2)*1
1tke_1	224	224	38	20	16	12.160	1.056	0.552	0.458	0.588	0.515	0	0	1	0	0	0	A1m	A	(d.15.10.1,d.67.1.1)*1
1tlj_1	377	377	36	32	22	25.344	0.667	0.497	0.412	0.377	0.467	0	1	0	0	0	0	C2o=	C2	(d.282.1.1)*2
1tll_1	1246	1246	57	51	36	104.652	0.655	0.432	0.359	0.351	0.414	0	1	0	0	0	0	C2m=	C2	(c.23.5.2,b.43.4.1,c.25.1.4)*2
1tlu_1	234	234	26	20	19	9.880	0.667	0.613	0.555	0.482	0.594	0	0	1	1	0	0	C2o=	C2	(d.156.1.2)*2
1tly_1	251	251	36	26	20	18.720	0.783	0.477	0.388	0.284	0.440	0	1	0	0	0	0	A1o	A	(f.4.6.1)*1
1tmq_1	588	588	49	34	25	41.650	0.831	0.536	0.395	0.602	0.474	0	0	1	0	0	0	A2	A	(a.52.1.2)*1+(c.1.8.1,b.71.1.1)*1
1to2_1	345	345	34	24	21	17.136	0.756	0.593	0.484	0.710	0.554	0	0	1	0	0	0	A2	A	(c.41.1.1)*1+(d.40.1.1)*1
1to6_1	742	742	67	40	22	58.960	1.081	0.339	0.321	0.307	0.341	0	1	0	0	0	0	C2o=	C2	(c.141.1.1)*2
1tol_1	157	157	28	20	14	7.840	0.824	0.590	0.475	0.647	0.545	0	0	1	0	0	0	A1m	A	(b.37.1.1,d.212.1.1)*1
1tqg_1	105	105	30	14	12	5.040	1.154	0.594	0.523	0.557	0.576	0	0	1	1	0	0	A1o	A	(a.24.10.3)*1
1tr0_1	1272	1272	51	51	31	80.631	0.622	0.261	0.377	0.000	0.311	1	0	0	0	1	0	D4+	D6	(d.58.4.4)*12
1trb_1	632	632	55	37	25	50.875	0.887	0.541	0.373	0.589	0.466	0	0	1	0	0	0	C2m=	C2	(c.3.1.5,c.3.1.5)*2
1ts9_1	98	98	27	16	13	5.616	0.931	0.598	0.466	0.597	0.543	0	0	1	0	0	0	A1o	A	(b.137.1.1)*1
1tt7_1	1974	1974	60	59	41	145.140	0.600	0.421	0.356	0.029	0.382	0	1	0	0	0	0	D3	D3	(b.35.1.2,c.2.1.1)*6
1tt8_1	164	164	23	20	17	7.820	0.622	0.577	0.527	0.488	0.560	0	0	1	1	0	0	A1o	A	(d.190.1.1)*1
1tu1_1	288	288	30	26	23	17.940	0.612	0.372	0.368	0.535	0.379	0	1	0	0	0	0	C2o=	C2	(d.107.1.3)*2
1tua_1	189	189	31	29	19	17.081	0.646	0.508	0.324	0.662	0.429	0	0	1	0	0	0	A1m	A	(d.51.1.1,d.51.1.1)*1
1tue_2	398	398	42	35	23	33.810	0.724	0.451	0.348	0.489	0.409	0	1	0	0	0	0	A2	A	(b.91.1.1)*1+(c.37.1.20)*1
1tug_1	2778	2778	76	76	50	288.800	0.603	0.358	0.283	0.088	0.319	1	0	0	0	0	0	D3	D3	(c.78.1.1)*6+(d.58.2.1,g.41.7.1)*6
1tx4_1	370	370	39	31	24	29.016	0.709	0.513	0.383	0.544	0.463	0	0	1	0	0	0	A2	A	(a.116.1.1)*1+(c.37.1.8)*1
1tx6_2	560	560	51	29	23	34.017	0.981	0.512	0.411	0.339	0.467	0	0	1	0	0	0	A3	A	(b.47.1.2)*2+(g.3.13.1,g.3.13.1)*1
1txk_1	490	490	45	30	29	39.150	0.763	0.541	0.374	0.581	0.467	0	0	1	0	0	0	A1m	A	(b.30.5.9,b.1.18.2)*1
1txu_1	254	254	43	24	17	17.544	1.049	0.566	0.418	0.530	0.507	0	0	1	0	0	0	A1o	A	(a.222.1.1)*1
1ty0_1	418	418	36	32	28	32.256	0.600	0.515	0.381	0.556	0.460	0	0	1	0	0	0	C2m=	C2	(b.40.2.2,d.15.6.1)*2
1tyg_1	1216	1216	87	60	55	287.100	0.757	0.324	0.148	0.329	0.242	1	0	0	0	0	0	D2	D2	(c.1.31.1)*4+(d.15.3.2)*4
1tzb_1	601	601	38	35	27	35.910	0.613	0.543	0.451	0.247	0.502	0	0	1	0	0	0	C2o=	C2	(c.80.1.1)*2
1tzi_1	1066	1066	130	30	25	97.500	2.364	0.412	0.309	0.292	0.371	0	1	0	0	0	1	C2m≠	C2	(b.1.1.1,b.1.1.2)*4+(g.17.1.1)*2
1tzo_1	3871	3871	90	89	54	432.540	0.629	0.334	0.267	0.064	0.304	1	0	0	0	0	0	C4+	C7	(b.179.1.1,f.60.1.1)*7
1tzp_1	476	476	61	26	22	34.892	1.271	0.552	0.393	0.654	0.485	0	0	1	0	0	0	C2o=	C2	(d.65.1.3)*2
1tzv_1	141	141	23	23	17	8.993	0.575	0.594	0.459	0.583	0.544	0	0	1	0	0	0	A1o	A	(a.79.1.1)*1
1u07_1	178	178	44	23	14	14.168	1.189	0.299	0.302	0.100	0.304	1	0	0	0	1	0	C2o=	C2	(d.212.1.2)*2
1u0n_1	731	731	50	41	32	65.600	0.685	0.436	0.323	0.562	0.389	0	1	0	0	0	0	A4+	A	(c.10.2.7)*1+(c.62.1.1)*1+(d.169.1.1)*2
1u0s_1	204	204	33	21	17	11.781	0.868	0.552	0.455	0.607	0.516	0	0	1	0	0	0	A2	A	(c.23.1.1)*1+(d.58.24.1)*1
1u2c_1	228	228	46	23	17	17.986	1.150	0.534	0.359	0.632	0.459	0	0	1	0	0	0	A1m	A	(b.1.6.2,d.272.1.1)*1
1u4q_1	318	318	101	16	13	21.008	3.483	0.573	0.415	0.645	0.508	0	0	1	0	0	1	A1m	A	(a.7.1.1,a.7.1.1,a.7.1.1)*1
1u5p_1	211	211	67	15	12	12.060	2.481	0.591	0.460	0.718	0.541	0	0	1	0	0	1	A1m	A	(a.7.1.1,a.7.1.1)*1
1u5t_1	738	738	70	62	34	147.560	0.729	0.284	0.167	0.365	0.232	1	0	0	0	0	0	A4+	A	(a.4.5.54,a.4.5.54)*4
1u5u_1	366	366	32	29	26	24.128	0.582	0.554	0.435	0.409	0.503	0	0	1	0	0	0	A1o	A	(e.5.1.2)*1
1u61_1	127	127	24	18	18	7.776	0.667	0.547	0.418	0.621	0.493	0	0	1	0	0	0	A1o	A	(a.149.1.1)*1
1u6g_1	1949	1949	87	54	47	220.806	0.861	0.271	0.244	0.495	0.269	1	0	0	0	0	0	A3	A	(a.118.1.2)*1+(a.118.17.1,e.40.1.1,a.4.5.34)*1+(g.44.1.1)*1
1u6z_1	998	998	61	48	30	87.840	0.782	0.456	0.345	0.589	0.412	0	1	0	0	0	0	C2m=	C2	(c.55.1.8,c.55.1.8,a.211.1.5)*2
1u7g_1	1149	1149	42	41	39	67.158	0.525	0.621	0.467	0.506	0.555	0	0	1	0	0	0	C3	C3	(f.44.1.1)*3
1u7k_1	786	786	49	49	24	57.624	0.671	0.487	0.377	0.131	0.434	0	1	0	0	0	0	C4+	C6	(a.73.1.1)*6
1u7l_1	364	364	72	26	20	37.440	1.565	0.370	0.270	0.490	0.325	1	0	0	0	0	0	A1o	A	(e.57.1.1)*1
1u7v_1	602	602	40	39	24	37.440	0.635	0.507	0.436	0.343	0.482	0	0	1	0	0	0	C3	C3	(b.26.1.1)*3
1u7z_2	438	438	48	27	22	28.512	0.980	0.448	0.395	0.296	0.435	0	1	0	0	0	0	C2o=	C2	(c.72.3.1)*2
1u84_1	81	81	20	15	11	3.300	0.769	0.612	0.571	0.464	0.604	0	0	1	1	0	0	A1o	A	(a.230.1.1)*1
1u8v_1	1960	1960	63	59	55	204.435	0.553	0.451	0.304	0.337	0.394	0	1	0	0	0	0	D2	D2	(e.6.1.1,a.29.3.1)*4
1u98_1	1866	1866	78	73	53	301.782	0.619	0.202	0.176	0.104	0.192	1	0	0	0	0	0	A4+	A	(c.37.1.11,d.48.1.1)*6
1u9t_1	654	654	53	34	28	50.456	0.855	0.401	0.338	0.257	0.378	0	1	0	0	0	0	A2	A	(e.62.1.1)*2
1u9y_1	1096	1096	47	46	34	73.508	0.588	0.417	0.376	0.087	0.397	0	1	0	0	0	0	D2	D2	(c.61.1.2,c.61.1.2)*4
1uan_1	1317	1317	55	43	42	99.330	0.647	0.460	0.389	0.057	0.431	0	1	0	0	0	0	D3	D3	(c.134.1.1)*6
1ub4_1	556	556	66	28	24	44.352	1.269	0.449	0.349	0.590	0.409	0	1	0	0	0	0	C2o≠	C2	(b.129.1.1)*2+(b.34.6.2)*4
1ucd_1	190	190	26	21	19	10.374	0.650	0.579	0.482	0.622	0.549	0	0	1	0	0	0	A1o	A	(d.124.1.1)*1
1ucs_1	64	64	16	13	11	2.288	0.667	0.601	0.571	0.641	0.598	0	0	1	1	0	0	A1o	A	(b.85.1.1)*1
1ud9_1	242	242	37	22	18	14.652	0.925	0.556	0.439	0.607	0.511	0	0	1	0	0	0	A1m	A	(d.131.1.2,d.131.1.2)*1
1udv_1	174	174	30	24	21	15.120	0.667	0.544	0.355	0.495	0.463	0	0	1	0	0	0	C2o=	C2	(d.68.6.1)*2
1udx_1	412	412	70	34	21	49.980	1.273	0.395	0.248	0.530	0.333	1	0	0	0	0	0	A1m	A	(b.117.1.1,c.37.1.8,d.242.1.1)*1
1ueb_1	184	184	44	27	15	17.820	1.048	0.371	0.284	0.238	0.335	1	0	0	0	0	0	A1m	A	(b.34.5.2,b.40.4.5,b.40.4.5)*1
1uf5_1	1212	1212	58	45	42	109.620	0.667	0.558	0.356	0.347	0.462	0	0	1	0	0	0	D2	D2	(d.160.1.2)*4
1ufb_1	254	254	36	20	20	14.400	0.900	0.590	0.475	0.581	0.548	0	0	1	0	0	0	C2o=	C2	(a.24.16.3)*2
1ufi_1	94	94	20	17	15	5.100	0.625	0.628	0.498	0.454	0.570	0	0	1	0	0	0	C2o=	C2	(a.30.4.1)*2
1ufy_1	363	363	33	32	21	22.176	0.623	0.569	0.460	0.474	0.535	0	0	1	0	0	0	C3	C3	(d.79.1.2)*3
1ug3_1	323	323	48	27	21	27.216	1.000	0.459	0.342	0.526	0.409	0	1	0	0	0	0	A1m	A	(a.118.1.14,a.118.1.14)*1
1ug9_1	1019	1019	66	43	31	87.978	0.892	0.300	0.280	0.139	0.290	1	0	0	0	0	0	A1m	A	(b.30.5.5,a.102.1.5,b.1.18.2,b.1.9.3)*1
1ugh_1	305	305	29	27	20	15.660	0.617	0.575	0.491	0.410	0.541	0	0	1	0	0	0	A2	A	(c.18.1.1)*1+(d.17.5.1)*1
1ugi_1	83	83	19	16	12	3.648	0.679	0.571	0.504	0.678	0.550	0	0	1	1	0	0	A1o	A	(d.17.5.1)*1
1uj8_1	73	73	18	16	12	3.456	0.643	0.606	0.500	0.739	0.562	0	0	1	1	0	0	A1o	A	(a.159.5.1)*1
1ukl_1	998	998	56	46	41	105.616	0.644	0.262	0.246	0.300	0.262	1	0	0	0	0	0	A3	A	(a.118.1.1)*1+(a.38.1.1)*2
1ukv_1	639	639	48	38	30	54.720	0.706	0.500	0.346	0.628	0.436	0	0	1	0	0	0	A2	A	(c.3.1.3,d.16.1.6,c.3.1.3)*1+(c.37.1.8)*1
1ul1_1	1743	1743	88	69	51	309.672	0.733	0.186	0.156	0.038	0.170	1	0	0	0	0	0	A4+	A	(c.120.1.2,a.60.7.1)*3+(d.131.1.2,d.131.1.2)*3
1ulk_1	252	252	34	24	22	17.952	0.739	0.405	0.344	0.105	0.371	0	1	0	0	0	0	C2m=	C2	(g.3.1.1,g.3.1.1,g.3.1.1)*2
1ulr_1	87	87	20	15	12	3.600	0.741	0.618	0.560	0.573	0.601	0	0	1	1	0	0	A1o	A	(d.58.10.1)*1
1um0_1	1460	1460	53	42	39	86.814	0.654	0.559	0.450	0.343	0.515	0	0	1	0	0	0	D2	D2	(d.258.1.1)*4
1umd_1	1369	1369	57	49	38	106.134	0.655	0.588	0.397	0.534	0.499	0	0	1	0	0	0	C2m≠	C2	(c.36.1.11)*2+(c.36.1.7,c.48.1.2)*2
1umg_1	2872	2872	59	53	53	165.731	0.557	0.514	0.457	0.238	0.489	0	0	1	0	0	0	D4+	D4	(d.280.1.1)*8
1umr_1	1040	1040	74	73	23	124.246	0.771	0.073	0.213	0.000	0.159	1	0	0	0	1	0	C4+	C4	(d.169.1.1)*8
1un8_1	1084	1084	76	36	34	93.024	1.086	0.400	0.311	0.521	0.371	0	1	0	0	0	0	C2m=	C2	(c.119.1.2,a.208.1.1)*2
1unb_1	867	867	46	45	30	62.100	0.613	0.475	0.404	0.167	0.446	0	1	0	0	0	0	C3	C3	(b.82.2.1)*3
1unn_1	955	955	70	49	27	92.610	0.921	0.352	0.302	0.018	0.324	0	1	0	0	0	0	C2m≠	C2	(d.131.1.1,d.131.1.1,d.131.1.1)*2+(d.240.1.1)*2
1unq_1	118	118	25	20	17	8.500	0.676	0.574	0.400	0.625	0.496	0	0	1	0	0	0	A1o	A	(b.55.1.1)*1
1uoy_1	64	64	16	14	11	2.464	0.640	0.634	0.527	0.578	0.596	0	0	1	1	0	0	A1o	A	(g.3.19.1)*1
1up8_1	7164	7164	80	79	79	499.280	0.506	0.460	0.396	0.224	0.434	0	1	0	0	0	0	TOI	T	(a.111.1.2)*12
1upt_2	445	445	57	31	23	40.641	1.056	0.506	0.338	0.611	0.436	0	0	1	0	0	0	C2o≠	C2	(a.193.1.1)*2+(c.37.1.8)*2
1urj_2	1031	1031	58	50	36	104.400	0.674	0.419	0.286	0.599	0.365	1	0	0	0	0	0	A1o	A	(e.58.1.1)*1
1us0_1	314	314	32	28	24	21.504	0.615	0.588	0.438	0.506	0.529	0	0	1	0	0	0	A1o	A	(c.1.7.1)*1
1us3_1	482	482	55	29	24	38.280	1.038	0.337	0.310	0.434	0.330	0	1	0	0	0	0	A1m	A	(b.18.1.11,c.1.8.3)*1
1us6_1	191	191	31	25	15	11.625	0.775	0.520	0.400	0.650	0.469	0	0	1	0	0	0	C2o=	C2	(a.2.13.1)*2
1us7_1	401	401	66	35	26	60.060	1.082	0.291	0.201	0.396	0.254	1	0	0	0	0	0	A2	A	(a.205.1.1)*1+(d.122.1.1)*1
1uso_1	157	157	26	19	17	8.398	0.722	0.563	0.485	0.631	0.539	0	0	1	0	0	0	C2o=	C2	(d.74.1.1)*2
1usv_3	397	397	42	34	23	32.844	0.737	0.483	0.358	0.557	0.430	0	1	0	0	0	0	A2	A	(d.14.1.8)*1+(d.83.2.1)*1
1usy_1	1910	1910	60	56	56	188.160	0.536	0.319	0.287	0.503	0.317	1	0	0	0	0	0	D2	D2	(c.94.1.1)*4+(d.104.1.1)*4
1ut1_1	419	419	39	37	18	25.974	0.709	0.356	0.388	0.076	0.377	0	1	0	0	1	0	C3	C3	(b.2.3.6)*3
1ut7_1	297	297	50	37	32	59.200	0.725	0.304	0.174	0.561	0.252	1	0	0	0	0	0	C2o=	C2	(b.143.1.1)*2
1ut9_1	605	605	42	32	27	36.288	0.712	0.612	0.477	0.634	0.559	0	0	1	0	0	0	A1m	A	(b.1.18.2,a.102.1.2)*1
1utd_1	774	774	46	43	21	41.538	0.719	0.415	0.429	0.063	0.411	0	1	0	0	1	0	C4+	C11	(b.82.5.1)*11
1utg_1	140	140	20	19	16	6.080	0.571	0.523	0.531	0.113	0.530	0	0	1	1	1	0	C2o=	C2	(a.101.1.1)*2
1utt_1	954	954	39	39	39	59.319	0.500	0.400	0.393	0.096	0.397	0	1	0	0	0	0	D3	D3	(d.92.1.11)*6
1uty_1	306	306	40	26	22	22.880	0.833	0.524	0.379	0.600	0.461	0	0	1	0	0	0	C2o=	C2	(b.147.1.1)*2
1uuj_2	157	157	35	22	15	11.550	0.946	0.529	0.380	0.520	0.463	0	0	1	0	0	0	C2o=	C2	(a.221.1.1)*2
1uun_1	1472	1472	60	46	46	126.960	0.652	0.085	0.238	0.000	0.173	1	0	0	0	1	0	C4+	C8	(f.6.1.2)*8
1uus_1	930	930	114	31	26	91.884	2.000	0.444	0.304	0.513	0.387	0	1	0	0	0	1	C2m=	C2	(a.47.1.1,b.2.5.5,d.93.1.1)*2
1uux_1	483	483	36	35	21	26.460	0.643	0.542	0.457	0.230	0.503	0	0	1	0	0	0	C3	C3	(c.57.1.1)*3
1uuz_1	259	259	31	25	20	15.500	0.689	0.562	0.442	0.431	0.509	0	0	1	0	0	0	A2	A	(d.2.1.2)*1+(d.233.1.1)*1
1uv7_1	150	150	26	17	17	7.514	0.765	0.561	0.471	0.432	0.518	0	0	1	0	0	0	C2o=	C2	(d.67.4.1)*2
1uw4_1	339	339	38	32	28	34.048	0.633	0.471	0.313	0.503	0.397	0	1	0	0	0	0	A2	A	(a.118.1.14)*1+(d.58.7.4)*1
1uwk_1	1107	1107	54	37	30	59.940	0.806	0.578	0.485	0.527	0.547	0	0	1	0	0	0	C2o=	C2	(e.51.1.1)*2
1uwv_1	418	418	41	36	21	30.996	0.719	0.411	0.353	0.186	0.383	0	1	0	0	0	0	A1m	A	(b.40.4.12,c.66.1.40)*1
1ux5_1	822	822	67	50	30	100.500	0.838	0.125	0.199	0.001	0.162	1	0	0	0	1	0	C2o=	C2	(a.207.1.1)*2
1ux6_1	335	335	40	26	20	20.800	0.870	0.559	0.433	0.591	0.508	0	0	1	0	0	0	A1m	A	(g.75.1.1,b.29.1.16)*1
1uxy_1	340	340	33	30	22	21.780	0.635	0.485	0.410	0.384	0.458	0	1	0	0	0	0	A1m	A	(d.145.1.2,d.146.1.1)*1
1uyj_1	819	819	66	59	58	225.852	0.564	0.121	0.098	0.001	0.103	1	0	0	0	0	0	C3	C3	(f.8.1.2)*3
1uyn_1	279	279	43	19	18	14.706	1.162	0.514	0.431	0.565	0.484	0	0	1	0	0	0	A1o	A	(f.4.5.1)*1
1uz3_1	199	199	50	29	18	26.100	1.064	0.463	0.248	0.662	0.363	1	0	0	0	0	0	C2o=	C2	(a.283.1.1)*2
1uzb_1	3096	3096	66	61	60	241.560	0.545	0.428	0.361	0.085	0.400	0	1	0	0	0	0	D3	D3	(c.82.1.1)*6
1uzk_1	152	152	39	17	14	9.282	1.258	0.565	0.421	0.633	0.506	0	0	1	0	0	0	A1m	A	(g.3.11.1,g.23.1.1,g.3.11.1)*1
1v0w_1	496	496	37	28	26	26.936	0.685	0.575	0.478	0.668	0.542	0	0	1	0	0	0	A1m	A	(d.136.1.2,d.136.1.2)*1
1v1h_1	305	305	51	22	21	23.562	1.186	0.569	0.344	0.495	0.457	0	0	1	0	0	0	C3	C3	(b.83.1.1,h.1.17.1)*3
1v3w_1	519	519	32	31	28	27.776	0.542	0.570	0.487	0.490	0.548	0	0	1	0	0	0	C3	C3	(b.81.1.5)*3
1v4a_1	429	429	40	34	22	29.920	0.714	0.552	0.417	0.629	0.498	0	0	1	0	0	0	A1m	A	(d.218.1.9,a.24.16.4)*1
1v4p_3	155	155	26	23	15	8.970	0.684	0.558	0.464	0.374	0.524	0	0	1	0	0	0	A1o	A	(d.67.1.2)*1
1v5i_1	351	351	35	26	21	19.110	0.745	0.622	0.456	0.630	0.545	0	0	1	0	0	0	A2	A	(c.41.1.1)*1+(d.58.3.2)*1
1v5v_1	798	798	51	33	31	52.173	0.797	0.454	0.411	0.460	0.447	0	1	0	0	0	0	C2m=	C2	(d.250.1.1,b.44.2.1)*2
1v6s_1	390	390	41	25	22	22.550	0.872	0.476	0.421	0.429	0.459	0	1	0	0	0	0	A1o	A	(c.86.1.1)*1
1v70_1	210	210	32	20	19	12.160	0.821	0.604	0.482	0.458	0.560	0	0	1	0	0	0	C2o=	C2	(b.82.1.9)*2
1v74_1	194	194	29	22	17	10.846	0.744	0.571	0.465	0.619	0.530	0	0	1	0	0	0	A2	A	(a.24.20.1)*1+(d.243.1.1)*1
1v7p_1	454	454	47	41	19	36.613	0.783	0.548	0.372	0.371	0.466	0	0	1	0	0	0	A3	A	(c.62.1.1)*1+(d.169.1.1)*2
1v7z_1	1542	1542	52	51	33	87.516	0.619	0.511	0.460	0.210	0.495	0	0	1	0	0	0	D3	D3	(c.125.1.1)*6
1v8c_2	330	330	35	30	18	18.900	0.729	0.478	0.427	0.543	0.455	0	1	0	0	0	0	C2m=	C2	(d.15.3.1,d.129.5.1)*2
1v8d_1	562	562	48	45	19	41.040	0.750	0.432	0.360	0.193	0.399	0	1	0	0	0	0	C3	C3	(c.140.1.1)*3
1v97_1	2594	2594	97	54	40	209.520	1.032	0.488	0.369	0.486	0.443	0	1	0	0	0	0	C2m=	C2	(d.15.4.2,a.56.1.1,d.145.1.3,d.87.2.1,d.41.1.1,d.133.1.1)*2
1v9d_1	1207	1207	67	50	42	140.700	0.728	0.176	0.233	0.002	0.208	1	0	0	0	1	0	D2	D2	(a.207.1.1)*4
1v9m_1	312	312	29	25	24	17.400	0.592	0.541	0.455	0.483	0.504	0	0	1	0	0	0	A1o	A	(f.40.1.1)*1
1v9p_1	584	584	55	41	35	78.925	0.724	0.330	0.232	0.572	0.294	1	0	0	0	0	0	A1m	A	(d.142.2.2,b.40.4.6,a.60.2.2)*1
1va6_1	507	507	36	32	29	33.408	0.590	0.536	0.423	0.517	0.488	0	0	1	0	0	0	A1o	A	(d.128.1.4)*1
1vaj_1	203	203	29	21	18	10.962	0.744	0.563	0.470	0.617	0.528	0	0	1	0	0	0	A1o	A	(d.309.1.1)*1
1vb0_1	61	61	22	14	9	2.772	0.957	0.676	0.525	0.721	0.617	0	0	1	1	0	0	A1o	A	(g.7.1.1)*1
1vb5_1	549	549	58	32	26	48.256	1.000	0.547	0.363	0.522	0.464	0	0	1	0	0	0	C2o=	C2	(c.124.1.5)*2
1vbg_1	1748	1748	82	47	45	173.430	0.891	0.313	0.251	0.567	0.297	1	0	0	0	0	0	C2m=	C2	(d.142.1.5,c.8.1.1,c.1.12.2)*2
1vbk_1	603	603	63	36	28	63.504	0.984	0.467	0.293	0.395	0.385	1	0	0	0	0	0	C2m=	C2	(d.308.1.1,c.26.2.6)*2
1vbw_1	68	68	19	16	9	2.736	0.760	0.616	0.542	0.630	0.595	0	0	1	1	0	0	A1o	A	(d.40.1.1)*1
1vcc_1	77	77	19	18	11	3.762	0.655	0.626	0.509	0.667	0.575	0	0	1	1	0	0	A1o	A	(d.121.1.1)*1
1vcl_1	432	432	41	28	20	22.960	0.854	0.524	0.457	0.501	0.503	0	0	1	0	0	0	A1m	A	(b.42.2.1,b.42.2.1,d.281.1.1)*1
1vct_1	193	193	38	24	18	16.416	0.905	0.475	0.336	0.549	0.419	0	1	0	0	0	0	A1m	A	(a.7.12.1,d.286.1.1)*1
1vdd_1	791	791	55	42	29	66.990	0.775	0.235	0.271	0.003	0.248	1	0	0	0	1	0	D2	D2	(e.49.1.1)*4
1vdh_1	1235	1235	46	45	39	80.730	0.548	0.436	0.427	0.038	0.437	0	1	0	0	0	0	C4+	C5	(d.58.4.10)*5
1vdm_1	1778	1778	73	50	46	167.900	0.760	0.482	0.339	0.369	0.423	0	1	0	0	0	0	D3	D3	(c.61.1.1)*12
1ve1_1	604	604	39	33	31	39.897	0.609	0.540	0.418	0.434	0.492	0	0	1	0	0	0	C2o=	C2	(c.79.1.1)*2
1vfy_1	67	67	24	13	11	3.432	1.000	0.637	0.473	0.644	0.562	0	0	1	0	0	0	A1o	A	(g.50.1.1)*1
1vg9_4	675	675	48	39	37	69.264	0.632	0.464	0.302	0.614	0.396	0	1	0	0	0	0	A2	A	(c.3.1.3,d.16.1.6)*1+(c.37.1.8)*1
1vgg_1	966	966	39	36	34	47.736	0.557	0.543	0.498	0.197	0.517	0	0	1	0	0	0	D3	D3	(d.256.1.1)*6
1vh4_1	824	824	51	40	34	69.360	0.689	0.469	0.337	0.611	0.414	0	1	0	0	0	0	C2o=	C2	(b.80.6.1)*2
1vh6_1	210	210	38	19	18	12.996	1.027	0.476	0.417	0.362	0.455	0	1	0	0	0	0	C2o=	C2	(a.24.19.1)*2
1vhe_1	365	365	45	26	24	28.080	0.900	0.522	0.362	0.511	0.452	0	0	1	0	0	0	A1m	A	(c.56.5.4,b.49.3.1)*1
1vhh_1	157	157	26	21	15	8.190	0.722	0.637	0.500	0.584	0.580	0	0	1	1	0	0	A1o	A	(d.65.1.2)*1
1vhy_1	241	241	36	24	20	17.280	0.818	0.521	0.375	0.626	0.461	0	0	1	0	0	0	A1m	A	(b.122.1.2,c.116.1.5)*1
1vi5_1	198	198	32	23	21	15.456	0.727	0.606	0.388	0.604	0.504	0	0	1	0	0	0	A1o	A	(c.23.15.1)*1
1vj1_1	341	341	38	24	21	19.152	0.844	0.458	0.422	0.210	0.446	0	1	0	0	0	0	A1m	A	(b.35.1.2,c.2.1.1)*1
1vj7_1	326	326	41	27	22	24.354	0.837	0.462	0.370	0.558	0.426	0	1	0	0	0	0	A1m	A	(a.211.1.1,d.218.1.8)*1
1vjl_1	280	280	40	26	18	18.720	0.909	0.546	0.411	0.423	0.487	0	0	1	0	0	0	C2o=	C2	(d.257.1.1)*2
1vk0_1	1200	1200	51	50	29	73.950	0.646	0.387	0.420	0.024	0.398	0	1	0	0	1	0	C4+	C6	(c.55.3.5)*6
1vk1_1	232	232	30	22	20	13.200	0.714	0.526	0.449	0.435	0.498	0	0	1	0	0	0	A1o	A	(d.268.1.2)*1
1vk5_1	121	121	30	21	12	7.560	0.909	0.610	0.440	0.656	0.533	0	0	1	0	0	0	A1o	A	(a.220.1.1)*1
1vkm_1	876	876	43	42	32	57.792	0.581	0.520	0.412	0.361	0.473	0	0	1	0	0	0	C3	C3	(c.138.1.1)*3
1vkw_1	217	217	34	24	18	14.688	0.810	0.560	0.413	0.714	0.500	0	0	1	0	0	0	A1o	A	(d.90.1.2)*1
1vky_1	563	563	48	38	32	58.368	0.686	0.267	0.252	0.197	0.263	1	0	0	0	0	0	C2o=	C2	(e.53.1.1)*2
1vlb_1	907	907	46	45	35	72.450	0.575	0.560	0.368	0.521	0.471	0	0	1	0	0	0	A1m	A	(d.15.4.2,a.56.1.1,d.41.1.1,d.133.1.1)*1
1vli_1	358	358	42	28	20	23.520	0.875	0.541	0.414	0.553	0.488	0	0	1	0	0	0	A1m	A	(c.1.10.6,b.85.1.1)*1
1vlr_1	582	582	41	37	34	51.578	0.577	0.378	0.326	0.305	0.359	0	1	0	0	0	0	C2m=	C2	(d.246.1.1,d.13.1.3)*2
1vls_1	292	292	43	24	21	21.672	0.956	0.468	0.374	0.402	0.433	0	1	0	0	0	0	C2o=	C2	(a.24.2.1)*2
1vly_1	323	323	37	30	19	21.090	0.755	0.590	0.435	0.436	0.524	0	0	1	0	0	0	A1m	A	(d.250.1.1,b.44.2.1)*1
1vmo_1	163	163	27	20	16	8.640	0.750	0.577	0.473	0.474	0.541	0	0	1	0	0	0	A1o	A	(b.77.1.1)*1
1vok_1	192	192	36	31	15	16.740	0.783	0.437	0.312	0.613	0.386	0	1	0	0	0	0	A1m	A	(d.129.1.1,d.129.1.1)*1
1vp7_1	145	145	43	23	16	15.824	1.103	0.423	0.264	0.606	0.355	1	0	0	0	0	0	C2o=	C2	(a.7.13.1)*2
1vp8_1	1140	1140	49	48	27	63.504	0.653	0.569	0.460	0.429	0.518	0	0	1	0	0	0	D3	D3	(c.49.1.2)*6
1vpb_1	874	874	45	41	33	60.885	0.608	0.173	0.323	0.001	0.259	1	0	0	0	1	0	C2o=	C2	(d.283.1.1)*2
1vqq_1	635	635	76	34	30	77.520	1.188	0.384	0.251	0.518	0.327	1	0	0	0	0	0	A1m	A	(d.17.4.5,d.175.1.1,e.3.1.1)*1
1vqs_1	884	884	38	37	36	50.616	0.521	0.453	0.443	0.024	0.433	0	1	0	0	0	0	D4+	D4	(d.58.4.13)*8
1vr0_1	472	472	47	26	26	31.772	0.904	0.537	0.426	0.523	0.501	0	0	1	0	0	0	C2o=	C2	(c.148.1.1)*2
1vr4_1	480	480	33	30	28	27.720	0.569	0.520	0.435	0.298	0.483	0	0	1	0	0	0	C4+	C5	(d.230.5.0)*4+(d.230.5.1)*1
1vr8_1	135	135	22	20	16	7.040	0.611	0.617	0.509	0.610	0.574	0	0	1	1	0	0	A1o	A	(d.312.1.1)*1
1vrm_1	309	309	32	29	22	20.416	0.627	0.515	0.402	0.585	0.468	0	0	1	0	0	0	A1o	A	(d.96.2.1)*1
1vyh_1	1056	1056	67	48	35	112.560	0.807	0.372	0.285	0.235	0.335	1	0	0	0	0	0	C2o≠	C2	(b.69.4.1)*2+(c.23.10.3)*2
1vyi_1	111	111	30	16	13	6.240	1.034	0.608	0.464	0.530	0.545	0	0	1	0	0	0	A1o	A	(d.293.1.1)*1
1vz0_4	381	381	43	33	26	36.894	0.729	0.416	0.304	0.350	0.367	0	1	0	0	0	0	C2m=	C2	(d.268.1.1,a.4.14.1)*2
1vz8_1	755	755	49	38	25	46.550	0.778	0.549	0.416	0.432	0.490	0	0	1	0	0	0	C2o=	C2	(d.154.1.2)*2
1vzi_1	250	250	29	25	18	13.050	0.674	0.619	0.500	0.423	0.566	0	0	1	1	0	0	C2m=	C2	(g.41.5.2,b.1.13.1)*2
1vzy_1	1152	1152	51	43	41	89.913	0.607	0.430	0.338	0.268	0.391	0	1	0	0	0	0	C2m=	C2	(d.193.1.1,g.81.1.1)*4
1w07_1	1313	1313	58	42	38	92.568	0.725	0.511	0.405	0.507	0.467	0	0	1	0	0	0	C2m=	C2	(e.6.1.2,a.29.3.2,a.29.3.2)*2
1w0j_1	3056	3056	83	60	58	288.840	0.703	0.433	0.320	0.312	0.387	0	1	0	0	0	0	A4+	A	(b.49.1.1,c.37.1.11,a.69.1.1)*6+(c.49.2.1)*1
1w0p_1	753	753	69	30	28	57.960	1.190	0.546	0.385	0.622	0.477	0	0	1	0	0	0	A1m	A	(b.29.1.8,b.68.1.1,b.29.1.8)*1
1w1w_6	796	796	57	44	39	97.812	0.687	0.353	0.254	0.217	0.309	1	0	0	0	0	0	C2o≠	C2	(a.4.5.57)*2+(c.37.1.12)*2
1w23_1	717	717	53	38	28	56.392	0.803	0.530	0.380	0.475	0.463	0	0	1	0	0	0	C2o=	C2	(c.67.1.4)*2
1w25_1	908	908	50	44	44	96.800	0.568	0.365	0.272	0.253	0.329	1	0	0	0	0	0	C2m=	C2	(c.23.1.1,c.23.1.1,d.58.29.2)*2
1w26_1	432	432	71	33	30	70.290	1.127	0.163	0.158	0.135	0.165	1	0	0	0	0	0	A1m	A	(d.241.2.1,d.26.1.1,a.223.1.1)*1
1w3s_2	231	231	40	20	19	15.200	1.026	0.561	0.416	0.615	0.504	0	0	1	0	0	0	A1m	A	(b.40.4.13,g.45.1.2)*1
1w53_1	168	168	25	20	18	9.000	0.658	0.614	0.501	0.512	0.567	0	0	1	1	0	0	C2o=	C2	(a.186.1.2)*2
1w55_1	2214	2214	69	54	53	197.478	0.645	0.342	0.310	0.033	0.323	0	1	0	0	0	0	D3	D3	(c.68.1.13,d.79.5.1)*6
1w58_1	1014	1014	61	60	37	135.420	0.629	0.318	0.222	0.123	0.274	1	0	0	0	0	0	C3	C3	(c.32.1.1,d.79.2.1)*3
1w5f_1	632	632	69	29	27	54.027	1.232	0.483	0.342	0.463	0.423	0	1	0	0	0	0	C2m=	C2	(c.32.1.1,d.79.2.1)*2
1w66_1	218	218	28	22	18	11.088	0.700	0.571	0.480	0.590	0.534	0	0	1	0	0	0	A1o	A	(d.104.1.3)*1
1w6s_1	1339	1339	66	40	39	102.960	0.835	0.452	0.375	0.477	0.428	0	1	0	0	0	0	C2o≠	C2	(a.137.2.1)*2+(b.70.1.1)*2
1w7i_1	895	895	72	40	33	95.040	0.986	0.372	0.270	0.502	0.334	1	0	0	0	0	0	A2	A	(a.39.1.5)*1+(b.34.3.0,c.37.1.9)*1
1w7j_1	1766	1766	87	78	41	278.226	0.731	0.350	0.202	0.132	0.271	1	0	0	0	0	0	C2m≠	C2	(a.39.1.5)*2+(b.34.3.1,c.37.1.9)*2
1w85_1	1414	1414	63	51	37	118.881	0.716	0.566	0.378	0.526	0.483	0	0	1	0	0	0	A4+	A	(a.9.1.1)*1+(c.36.1.11)*2+(c.36.1.7,c.48.1.2)*2
1w94_1	155	155	26	19	17	8.398	0.722	0.626	0.483	0.415	0.559	0	0	1	0	0	0	A1o	A	(c.51.1.2)*1
1w99_1	1674	1674	70	69	52	251.160	0.579	0.296	0.204	0.474	0.265	1	0	0	0	0	0	C3	C3	(f.1.3.1,b.77.2.1,b.18.1.3)*3
1w9g_1	103	103	27	22	12	7.128	0.794	0.535	0.380	0.641	0.463	0	0	1	0	0	0	A1o	A	(d.330.1.1)*1
1w9h_1	398	398	35	30	25	26.250	0.636	0.519	0.417	0.645	0.478	0	0	1	0	0	0	A1m	A	(c.44.3.1,c.55.3.15)*1
1w9q_1	163	163	34	19	14	9.044	1.030	0.565	0.447	0.669	0.517	0	0	1	0	0	0	A1m	A	(b.36.1.1,b.36.1.1)*1
1wa5_1	1586	1586	72	58	52	217.152	0.655	0.340	0.234	0.468	0.296	1	0	0	0	0	0	A3	A	(a.118.1.1)*2+(c.37.1.8)*1
1waa_1	552	552	41	40	24	39.360	0.641	0.492	0.397	0.177	0.451	0	1	0	0	0	0	D3	D3	(b.1.1.4)*6
1wao_1	471	471	44	35	22	33.880	0.772	0.559	0.402	0.637	0.490	0	0	1	0	0	0	A1m	A	(a.118.8.1,d.159.1.3)*1
1wbe_1	204	204	31	25	16	12.400	0.756	0.568	0.464	0.580	0.529	0	0	1	0	0	0	A1o	A	(a.224.1.1)*1
1wbh_1	640	640	43	41	26	45.838	0.642	0.523	0.365	0.463	0.452	0	0	1	0	0	0	C3	C3	(c.1.10.1)*3
1wc9_1	322	322	38	25	22	20.900	0.809	0.572	0.431	0.551	0.512	0	0	1	0	0	0	C2o=	C2	(d.278.1.2)*2
1wcw_1	254	254	40	21	20	16.800	0.976	0.519	0.409	0.421	0.472	0	0	1	0	0	0	A1o	A	(c.113.1.1)*1
1wde_1	289	289	38	24	19	17.328	0.884	0.478	0.410	0.503	0.454	0	1	0	0	0	0	A1o	A	(c.90.1.1)*1
1wdk_1	2199	2199	67	59	52	205.556	0.604	0.289	0.281	0.127	0.291	1	0	0	0	0	0	C2m≠	C2	(c.14.1.3,c.2.1.6,a.100.1.3,a.100.1.3)*2+(c.95.1.1,c.95.1.1)*2
1wej_1	541	541	55	25	25	34.375	1.100	0.457	0.392	0.435	0.432	0	1	0	0	0	0	A3	A	(a.3.1.1)*1+(b.1.1.1,b.1.1.2)*2
1wek_1	1240	1240	51	50	37	94.350	0.586	0.486	0.352	0.641	0.428	0	1	0	0	0	0	D3	D3	(c.129.1.1)*6
1wf3_1	296	296	33	31	23	23.529	0.611	0.480	0.356	0.588	0.434	0	1	0	0	0	0	A1m	A	(c.37.1.8,d.52.3.1)*1
1whi_1	244	244	46	25	16	18.400	1.122	0.534	0.358	0.599	0.454	0	0	1	0	0	0	C2o=	C2	(b.39.1.1)*2
1whz_1	70	70	20	15	10	3.000	0.800	0.595	0.554	0.402	0.581	0	0	1	1	0	0	A1o	A	(d.50.3.2)*1
1wj9_1	188	188	29	22	17	10.846	0.744	0.566	0.448	0.536	0.522	0	0	1	0	0	0	A1m	A	(d.58.53.1,d.58.53.1)*1
1wjx_1	112	112	22	18	16	6.336	0.647	0.599	0.469	0.511	0.543	0	0	1	0	0	0	A1o	A	(b.111.1.1)*1
1wky_1	446	446	42	26	23	25.116	0.857	0.557	0.461	0.679	0.524	0	0	1	0	0	0	A1m	A	(c.1.8.3,b.18.1.31)*1
1wlg_1	586	586	86	38	21	68.628	1.458	0.319	0.229	0.395	0.285	1	0	0	0	0	0	A2	A	(b.152.1.1)*2
1wls_1	656	656	43	30	29	37.410	0.729	0.546	0.459	0.367	0.512	0	0	1	0	0	0	C2o=	C2	(c.88.1.0)*2
1wm3_1	216	216	26	26	21	14.196	0.553	0.528	0.405	0.333	0.470	0	0	1	0	0	0	C3	C3	(d.15.1.1)*3
1wmd_1	434	434	36	27	21	20.412	0.750	0.622	0.522	0.559	0.582	0	0	1	1	0	0	A1m	A	(c.41.1.1,b.18.1.20)*1
1wmi_1	298	298	45	27	23	27.945	0.900	0.550	0.353	0.510	0.459	0	0	1	0	0	0	C2o≠	C2	(a.137.13.0)*1+(a.137.13.1)*1+(d.298.1.2)*2
1wn2_1	236	236	29	23	19	12.673	0.690	0.602	0.471	0.599	0.548	0	0	1	0	0	0	C2o=	C2	(c.131.1.0)*2
1wn9_1	127	127	21	16	15	5.040	0.677	0.609	0.549	0.634	0.586	0	0	1	1	0	0	A1o	A	(d.319.1.1)*1
1wnh_1	220	220	32	22	21	14.784	0.744	0.572	0.427	0.595	0.512	0	0	1	0	0	0	A1m	A	(d.17.1.0,d.17.1.5)*1
1wok_1	1400	1400	84	63	26	137.592	0.944	0.374	0.304	0.101	0.341	0	1	0	0	0	0	D2	D2	(a.41.1.0,d.166.1.0)*4
1wol_1	122	122	24	18	16	6.912	0.706	0.578	0.457	0.715	0.529	0	0	1	0	0	0	A1o	A	(a.24.16.0)*1
1wp5_1	323	323	36	24	23	19.872	0.766	0.457	0.418	0.186	0.446	0	1	0	0	0	0	A1o	A	(b.68.10.1)*1
1wpb_1	4032	4032	71	70	69	342.930	0.511	0.215	0.325	0.000	0.277	1	0	0	0	1	0	TOI	O	(a.233.1.1)*24
1wpv_1	882	882	46	44	24	48.576	0.676	0.550	0.483	0.309	0.531	0	0	1	0	0	0	D3	D3	(d.275.1.1)*6
1wpx_1	625	625	44	31	28	38.192	0.746	0.546	0.443	0.631	0.509	0	0	1	0	0	0	A2	A	(b.17.1.1)*1+(c.69.1.5)*1
1wqj_1	142	142	33	22	13	9.438	0.943	0.542	0.362	0.629	0.453	0	0	1	0	0	0	A2	A	(g.1.1.1)*1+(g.3.9.1)*1
1wqw_1	470	470	53	24	23	29.256	1.128	0.580	0.443	0.523	0.522	0	0	1	0	0	0	C2m=	C2	(d.104.1.2,b.34.1.1)*2
1wrd_1	174	174	30	27	18	14.580	0.667	0.518	0.345	0.542	0.440	0	0	1	0	0	0	A2	A	(a.7.8.1)*1+(d.15.1.1)*1
1wrv_1	897	897	51	50	31	79.050	0.630	0.510	0.334	0.432	0.424	0	0	1	0	0	0	C3	C3	(e.17.1.0)*3
1wta_1	819	819	50	49	30	73.500	0.633	0.469	0.317	0.318	0.395	0	1	0	0	0	0	C3	C3	(c.56.2.1)*3
1wub_1	176	176	36	20	16	11.520	1.000	0.520	0.398	0.304	0.458	0	0	1	0	0	0	A1o	A	(b.61.6.1)*1
1wv3_1	186	186	33	20	19	12.540	0.846	0.564	0.426	0.543	0.514	0	0	1	0	0	0	A1m	A	(b.26.1.4,b.26.1.4)*1
1wv8_1	142	142	26	22	19	10.868	0.634	0.531	0.365	0.587	0.458	0	0	1	0	0	0	C2o=	C2	(d.304.1.1)*2
1wvc_1	1524	1524	55	54	44	130.680	0.561	0.300	0.305	0.136	0.318	0	1	0	0	1	0	D3	D3	(c.68.1.13)*6
1wve_1	1180	1180	57	40	34	77.520	0.770	0.564	0.438	0.489	0.513	0	0	1	0	0	0	C2m≠	C2	(a.3.1.1)*2+(d.145.1.1,d.58.32.1)*2
1wvf_1	1030	1030	53	42	33	73.458	0.707	0.564	0.417	0.504	0.501	0	0	1	0	0	0	C2m=	C2	(d.145.1.1,d.58.32.1)*2
1ww9_1	1167	1167	58	57	32	105.792	0.652	0.294	0.309	0.021	0.306	1	0	0	0	1	0	C3	C3	(b.33.1.2,d.129.3.3)*3
1wwi_1	148	148	27	17	16	7.344	0.818	0.589	0.502	0.614	0.555	0	0	1	1	0	0	A1o	A	(a.22.1.4)*1
1wxx_1	764	764	50	37	31	57.350	0.735	0.475	0.374	0.370	0.434	0	1	0	0	0	0	C2m=	C2	(b.122.1.9,c.66.1.51)*2
1wy6_1	159	159	35	16	13	7.280	1.207	0.602	0.521	0.561	0.568	0	0	1	1	0	0	A1o	A	(a.118.20.1)*1
1wyw_1	295	295	36	25	19	17.100	0.818	0.571	0.447	0.622	0.519	0	0	1	0	0	0	A2	A	(c.18.1.2)*1+(d.15.1.1)*1
1wzd_1	416	416	52	24	22	27.456	1.130	0.502	0.402	0.497	0.465	0	0	1	0	0	0	A2	A	(a.132.1.1)*2
1x0c_1	549	549	41	32	24	31.488	0.732	0.601	0.471	0.587	0.548	0	0	1	0	0	0	A1m	A	(b.133.1.0,b.80.1.0)*1
1x0g_1	427	427	42	33	21	29.106	0.778	0.510	0.384	0.359	0.452	0	0	1	0	0	0	C2o=	C2	(b.124.1.0)*4
1x0l_1	1318	1318	72	45	45	145.800	0.800	0.404	0.266	0.505	0.345	1	0	0	0	0	0	D2	D2	(c.77.1.0)*4
1x0p_1	1399	1399	56	55	39	120.120	0.596	0.304	0.326	0.000	0.311	0	1	0	0	1	0	D4+	D5	(d.58.10.2)*10
1x0u_1	3108	3108	73	70	42	214.620	0.652	0.465	0.408	0.141	0.447	0	1	0	0	0	0	D3	D3	(c.14.1.0,c.14.1.0)*6
1x3l_1	436	436	45	33	21	31.185	0.833	0.476	0.367	0.521	0.431	0	1	0	0	0	0	A1o	A	(c.118.1.0)*1
1x54_1	868	868	55	45	31	76.725	0.724	0.553	0.364	0.530	0.469	0	0	1	0	0	0	C2m=	C2	(b.40.4.0,d.104.1.0)*2
1x6i_1	176	176	30	16	16	7.680	0.938	0.563	0.536	0.466	0.558	0	0	1	1	0	0	C2o=	C2	(a.218.1.0)*2
1x6j_1	88	88	25	15	13	4.875	0.893	0.508	0.437	0.382	0.483	0	0	1	0	0	0	A1o	A	(a.218.1.0)*1
1x6m_1	390	390	42	29	25	30.450	0.778	0.464	0.345	0.499	0.409	0	1	0	0	0	0	C2o=	C2	(b.88.1.4)*2
1x6z_1	120	120	28	17	10	4.760	1.037	0.594	0.534	0.483	0.579	0	0	1	1	0	0	A1o	A	(d.24.1.1)*1
1x75_1	451	451	43	31	29	38.657	0.717	0.496	0.347	0.601	0.435	0	1	0	0	0	0	C2o≠	C2	(b.34.6.1)*2+(e.11.1.1)*2
1x7f_1	347	347	45	26	20	23.400	0.978	0.557	0.414	0.580	0.493	0	0	1	0	0	0	A1m	A	(c.1.8.12,b.62.1.2)*1
1x8p_1	184	184	22	21	18	8.316	0.564	0.543	0.508	0.225	0.528	0	0	1	1	0	0	A1o	A	(b.60.1.1)*1
1x8z_1	302	302	51	30	23	35.190	0.962	0.244	0.224	0.039	0.240	1	0	0	0	0	0	C2o=	C2	(a.29.6.1)*2
1x91_1	149	149	35	16	14	7.840	1.167	0.612	0.477	0.587	0.557	0	0	1	0	0	0	A1o	A	(a.29.6.1)*1
1x9j_1	2976	2976	79	77	38	231.154	0.687	0.314	0.321	0.005	0.306	0	1	0	0	1	0	D4+	D4	(c.55.1.2,c.55.1.2)*8
1x9y_1	346	346	39	25	23	22.425	0.812	0.567	0.443	0.432	0.520	0	0	1	0	0	0	A1m	A	(d.17.1.4,d.3.1.1)*1
1x9z_1	364	364	46	40	25	46.000	0.708	0.208	0.199	0.007	0.200	1	0	0	0	0	0	C2o=	C2	(d.292.1.1)*2
1xa6_1	399	399	46	34	22	34.408	0.821	0.447	0.334	0.515	0.404	0	1	0	0	0	0	A1m	A	(d.93.1.1,g.49.1.1,a.116.1.1)*1
1xak_1	68	68	21	15	11	3.465	0.808	0.603	0.485	0.546	0.557	0	0	1	0	0	0	A1o	A	(b.1.24.1)*1
1xbi_1	118	118	20	17	16	5.440	0.606	0.600	0.511	0.734	0.570	0	0	1	1	0	0	A1o	A	(d.79.3.1)*1
1xcf_1	952	952	64	46	33	97.152	0.810	0.406	0.274	0.524	0.347	1	0	0	0	0	0	A4+	A	(c.1.2.4)*4
1xck_1	3668	3668	81	80	49	317.520	0.628	0.220	0.273	0.001	0.243	1	0	0	0	1	0	C4+	C7	(a.129.1.1,d.56.1.1,c.8.5.1)*7
1xcr_1	313	313	29	26	22	16.588	0.604	0.598	0.500	0.565	0.565	0	0	1	1	0	0	A1o	A	(d.290.1.2)*1
1xd4_1	824	824	71	51	32	115.872	0.855	0.170	0.192	0.018	0.182	1	0	0	0	1	0	A1m	A	(a.87.1.1,b.55.1.1,a.117.1.1)*1
1xd5_1	112	112	21	18	12	4.536	0.700	0.639	0.558	0.506	0.606	0	0	1	1	0	0	A1o	A	(b.78.1.1)*1
1xdi_1	1836	1836	76	51	50	193.800	0.752	0.432	0.277	0.399	0.365	1	0	0	0	0	0	D2	D2	(c.3.1.5,d.87.1.1)*4
1xdp_1	1374	1374	66	46	38	115.368	0.786	0.359	0.350	0.088	0.361	0	1	0	0	0	0	C2m=	C2	(a.7.15.1,d.322.1.2,d.136.1.4,d.136.1.4)*2
1xdt_1	1118	1118	50	49	34	83.300	0.602	0.422	0.352	0.463	0.402	0	1	0	0	0	0	C2m≠	C2	(d.166.1.1,f.1.2.1,b.2.1.1)*2+(g.3.11.1)*2
1xeo_1	165	165	25	21	19	9.975	0.625	0.569	0.442	0.456	0.514	0	0	1	0	0	0	A1o	A	(d.167.1.1)*1
1xff_1	477	477	51	24	21	25.704	1.133	0.551	0.462	0.584	0.519	0	0	1	0	0	0	C2o=	C2	(d.153.1.1)*2
1xfi_1	343	343	35	28	21	20.580	0.714	0.556	0.453	0.519	0.517	0	0	1	0	0	0	A1o	A	(e.50.1.1)*1
1xfj_1	256	256	30	24	17	12.240	0.732	0.582	0.514	0.598	0.561	0	0	1	1	0	0	A1o	A	(d.194.1.2)*1
1xg0_1	494	494	39	32	24	29.952	0.696	0.510	0.420	0.391	0.471	0	0	1	0	0	0	A4+	A	(a.1.1.3)*2+(d.184.1.1)*2
1xg2_1	468	468	41	32	28	36.736	0.683	0.557	0.377	0.597	0.478	0	0	1	0	0	0	A2	A	(a.29.6.0)*1+(b.80.1.5)*1
1xhk_1	372	372	38	33	20	25.080	0.717	0.440	0.386	0.326	0.431	0	1	0	0	0	0	C2o=	C2	(d.14.1.10)*2
1xiz_2	156	156	22	19	17	7.106	0.611	0.577	0.522	0.658	0.571	0	0	1	1	0	0	A1o	A	(d.112.1.1)*1
1xjl_1	638	638	61	42	25	64.050	0.910	0.357	0.296	0.236	0.337	1	0	0	0	0	0	C2o=	C2	(a.65.1.1)*2
1xkp_1	477	477	54	26	24	33.696	1.080	0.487	0.378	0.491	0.438	0	1	0	0	0	0	A3	A	(a.243.1.3)*1+(d.198.1.1)*2
1xkr_1	205	205	29	22	17	10.846	0.744	0.564	0.482	0.550	0.540	0	0	1	0	0	0	A1o	A	(d.252.1.1)*1
1xly_1	408	408	40	28	27	30.240	0.727	0.558	0.401	0.525	0.487	0	0	1	0	0	0	C2o=	C2	(a.232.1.1)*2
1xmk_1	79	79	21	17	12	4.284	0.724	0.596	0.462	0.417	0.536	0	0	1	0	0	0	A1o	A	(a.4.5.19)*1
1xov_1	315	315	56	22	21	25.872	1.302	0.521	0.356	0.543	0.446	0	0	1	0	0	0	A1m	A	(c.56.5.6,b.34.11.4)*1
1xpc_1	490	490	47	31	30	43.710	0.770	0.509	0.354	0.589	0.449	0	0	1	0	0	0	C2o=	C2	(a.123.1.1)*2
1xpp_1	397	397	55	34	24	44.880	0.948	0.383	0.273	0.351	0.330	1	0	0	0	0	0	C2o=	C2	(d.74.3.2)*4
1xqb_1	372	372	49	30	21	30.870	0.961	0.520	0.358	0.526	0.443	0	0	1	0	0	0	C2o=	C2	(e.56.1.1)*2
1xqo_1	253	253	29	21	19	11.571	0.725	0.564	0.524	0.380	0.548	0	0	1	1	0	0	A1o	A	(a.96.1.6)*1
1xrs_1	1456	1456	91	43	36	140.868	1.152	0.458	0.316	0.529	0.397	0	1	0	0	0	0	C2m≠	C2	(c.1.19.4)*2+(d.230.4.1,c.23.6.1)*2
1xs0_1	256	256	32	22	20	14.080	0.762	0.601	0.468	0.696	0.547	0	0	1	0	0	0	C2o=	C2	(d.233.1.1)*2
1xsz_1	356	356	42	37	22	34.188	0.712	0.514	0.312	0.542	0.416	0	0	1	0	0	0	A1m	A	(a.118.3.1,d.129.9.1)*1
1xta_1	439	439	41	35	33	47.355	0.603	0.421	0.277	0.236	0.350	1	0	0	0	0	0	C2m=	C2	(d.111.1.1,g.19.1.0)*2
1xu1_1	524	524	38	35	31	41.230	0.576	0.564	0.377	0.592	0.477	0	0	1	0	0	0	C3	C3	(b.22.1.1)*3+(g.24.1.2)*3
1xv2_2	465	465	43	28	20	24.080	0.896	0.580	0.503	0.516	0.554	0	0	1	1	0	0	C2o=	C2	(d.290.1.1)*2
1xwl_1	580	580	45	34	31	47.430	0.692	0.353	0.322	0.272	0.342	0	1	0	0	0	0	A1m	A	(c.55.3.5,e.8.1.1)*1
1xwm_1	424	424	42	29	21	25.578	0.840	0.552	0.449	0.448	0.520	0	0	1	0	0	0	C2o=	C2	(a.7.12.1)*2
1xx6_1	344	344	36	33	23	27.324	0.643	0.543	0.376	0.560	0.469	0	0	1	0	0	0	C2m=	C2	(c.37.1.24,g.39.1.14)*2
1xx9_1	749	749	60	33	28	55.440	0.984	0.441	0.372	0.316	0.409	0	1	0	0	0	0	C2o≠	C2	(b.16.1.1)*2+(b.47.1.2)*2
1xyf_1	854	854	54	38	35	71.820	0.740	0.374	0.304	0.247	0.348	0	1	0	0	0	0	C2m=	C2	(c.1.8.3,b.42.2.1)*2
1xzp_1	587	587	52	49	37	94.276	0.605	0.361	0.203	0.576	0.291	1	0	0	0	0	0	A2	A	(d.250.1.2)*1+(d.250.1.2,a.24.25.1,c.37.1.8)*1
1y02_1	91	91	26	16	13	5.408	0.897	0.610	0.451	0.662	0.545	0	0	1	0	0	0	A1m	A	(g.50.1.1,a.140.2.1)*1
1y0n_1	71	71	22	15	12	3.960	0.815	0.590	0.458	0.693	0.535	0	0	1	0	0	0	A1o	A	(d.291.1.1)*1
1y0p_1	568	568	44	36	23	36.432	0.746	0.519	0.411	0.459	0.474	0	0	1	0	0	0	A1m	A	(a.138.1.3,c.3.1.4,d.168.1.1)*1
1y1l_1	496	496	48	34	21	34.272	0.873	0.512	0.401	0.328	0.463	0	0	1	0	0	0	D2	D2	(c.44.1.1)*4
1y2g_2	140	140	26	20	15	7.800	0.743	0.589	0.467	0.695	0.543	0	0	1	0	0	0	A1o	A	(d.129.4.1)*1
1y60_1	841	841	38	38	26	37.544	0.594	0.580	0.516	0.340	0.548	0	0	1	1	0	0	C4+	C5	(d.14.1.12)*5
1y64_1	768	768	64	50	38	121.600	0.727	0.340	0.203	0.545	0.284	1	0	0	0	0	0	A2	A	(a.207.1.1)*1+(c.55.1.0,c.55.1.1)*1
1y6m_1	692	692	90	44	39	154.440	1.084	0.295	0.159	0.267	0.228	1	0	0	0	0	0	C2m≠	C2	(a.26.1.3)*2+(b.1.2.1,b.1.2.1)*2
1y6x_1	174	174	39	25	18	17.550	0.907	0.459	0.287	0.482	0.375	1	0	0	0	0	0	C2o=	C2	(a.204.1.4)*2
1y7p_2	434	434	33	31	26	26.598	0.579	0.555	0.449	0.384	0.517	0	0	1	0	0	0	C2m=	C2	(d.58.18.12,c.23.1.7)*2
1y88_1	368	368	53	29	23	35.351	1.019	0.334	0.295	0.146	0.323	1	0	0	0	0	0	C2m=	C2	(c.52.1.30,a.60.4.3)*2
1y8x_1	252	252	42	19	18	14.364	1.135	0.587	0.456	0.536	0.531	0	0	1	0	0	0	A2	A	(c.111.1.2)*1+(d.20.1.1)*1
1yac_1	1632	1632	48	43	42	86.688	0.565	0.492	0.476	0.089	0.486	0	1	0	0	0	0	D4+	D4	(c.33.1.3)*8
1yb0_1	473	473	35	35	28	34.300	0.556	0.445	0.376	0.504	0.424	0	1	0	0	0	0	C3	C3	(d.118.1.1)*3
1yb3_1	166	166	28	21	14	8.232	0.800	0.575	0.506	0.613	0.551	0	0	1	1	0	0	A1o	A	(d.296.1.2)*1
1yba_1	1624	1624	71	53	38	142.994	0.780	0.347	0.309	0.177	0.339	0	1	0	0	0	0	D2	D2	(c.23.12.1,c.2.1.4,d.58.18.1)*4
1ybz_1	76	76	34	15	9	4.590	1.417	0.356	0.357	0.451	0.365	0	1	0	0	1	0	A1o	A	(a.130.1.1)*1
1ycy_1	992	992	40	39	38	59.280	0.519	0.127	0.315	0.000	0.229	1	0	0	0	1	0	D4+	D8	(b.38.1.4)*16
1ydl_1	71	71	31	17	10	5.270	1.148	0.518	0.343	0.608	0.439	0	0	1	0	0	0	A1o	A	(d.295.1.1)*1
1yf2_1	425	425	47	42	30	59.220	0.653	0.230	0.197	0.028	0.209	1	0	0	0	0	0	A1m	A	(d.287.1.2,d.287.1.2)*1
1yf9_1	477	477	38	37	22	30.932	0.644	0.426	0.406	0.154	0.420	0	1	0	0	0	0	C3	C3	(d.20.1.1)*3
1yfs_1	448	448	41	29	28	33.292	0.719	0.408	0.361	0.478	0.394	0	1	0	0	0	0	A1m	A	(d.104.1.1,a.203.1.1)*1
1yge_1	839	839	56	36	30	60.480	0.848	0.535	0.412	0.547	0.488	0	0	1	0	0	0	A1m	A	(b.12.1.1,a.119.1.1)*1
1ygy_1	2108	2108	76	56	50	212.800	0.717	0.362	0.269	0.408	0.324	1	0	0	0	0	0	C2m=	C2	(c.23.12.1,c.2.1.4,d.81.2.2,d.58.18.1)*4
1yhc_1	532	532	55	29	22	35.090	1.078	0.434	0.391	0.277	0.418	0	1	0	0	0	0	C2m=	C2	(d.14.1.7,d.14.1.7)*2
1yi5_1	1356	1356	62	61	33	124.806	0.660	0.444	0.317	0.182	0.378	0	1	0	0	0	0	C4+	C5	(b.96.1.1)*5+(g.7.1.1)*5
1yii_1	316	316	38	24	22	20.064	0.826	0.517	0.418	0.507	0.481	0	0	1	0	0	0	A1o	A	(a.65.1.1)*1
1yj5_1	762	762	64	36	27	62.208	1.016	0.446	0.338	0.314	0.397	0	1	0	0	0	0	A2	A	(c.108.1.9,c.37.1.1)*2
1ykh_1	209	209	65	25	15	24.375	1.625	0.278	0.240	0.074	0.262	1	0	0	0	0	0	A2	A	(a.252.1.1)*1+(a.252.1.2)*1
1yla_1	402	402	37	31	22	25.234	0.698	0.460	0.406	0.289	0.441	0	1	0	0	0	0	C2m=	C2	(d.20.1.1,a.5.2.1)*2
1ylf_1	354	354	43	41	28	49.364	0.623	0.307	0.208	0.109	0.256	1	0	0	0	0	0	C3	C3	(a.4.5.0)*2+(a.4.5.55)*1
1ylo_1	4152	4152	70	70	69	338.100	0.504	0.304	0.330	0.046	0.324	0	1	0	0	1	0	TOI	T	(c.56.5.4,b.49.3.1)*12
1ylx_1	200	200	25	23	20	11.500	0.581	0.578	0.465	0.637	0.534	0	0	1	0	0	0	C2o=	C2	(d.82.5.1)*2
1ym7_1	608	608	53	41	28	60.844	0.768	0.395	0.295	0.365	0.353	1	0	0	0	0	0	A1m	A	(a.91.1.1,d.144.1.7,b.55.1.1)*1
1ynt_1	1427	1427	91	59	34	182.546	0.978	0.295	0.211	0.284	0.260	1	0	0	0	0	0	A4+	A	(b.1.1.0,b.1.1.2)*2+(b.1.1.2)*2+(b.6.2.1,b.6.2.1)*2+(d.15.7.1)*1
1yoz_1	229	229	29	24	23	16.008	0.617	0.541	0.401	0.347	0.474	0	0	1	0	0	0	C2o=	C2	(a.253.1.1)*2
1yp4_1	1725	1725	61	57	52	180.804	0.560	0.446	0.295	0.250	0.371	1	0	0	0	0	0	D2	D2	(c.68.1.6,b.81.1.4)*4
1yq2_1	6120	6120	87	86	71	531.222	0.554	0.388	0.321	0.035	0.348	0	1	0	0	0	0	D3	D3	(b.18.1.5,b.1.4.1,c.1.8.3,b.1.4.1,b.30.5.1)*6
1yqe_1	282	282	30	24	20	14.400	0.682	0.612	0.508	0.543	0.573	0	0	1	1	0	0	A1o	A	(c.56.7.1)*1
1yro_1	395	395	41	27	23	25.461	0.820	0.527	0.439	0.292	0.492	0	0	1	0	0	0	A2	A	(c.68.1.2)*1+(d.2.1.2)*1
1yt3_1	375	375	42	32	22	29.568	0.778	0.393	0.348	0.201	0.373	0	1	0	0	0	0	A1m	A	(c.55.3.5,a.60.8.3,a.60.8.3)*1
1yt8_1	525	525	42	33	28	38.808	0.689	0.448	0.372	0.208	0.416	0	1	0	0	0	0	A1m	A	(c.46.1.2,c.46.1.2,c.46.1.2,c.46.1.2)*1
1yu0_1	1128	1128	54	38	37	75.924	0.720	0.524	0.400	0.314	0.472	0	0	1	0	0	0	C3	C3	(b.163.1.1,d.169.1.8)*3
1yu5_1	67	67	19	16	12	3.648	0.679	0.586	0.456	0.774	0.532	0	0	1	0	0	0	A1o	A	(a.14.1.1)*1
1yuw_1	554	554	59	34	28	56.168	0.952	0.425	0.289	0.437	0.365	1	0	0	0	0	0	A1m	A	(c.55.1.1,c.55.1.1,b.130.1.1)*1
1yuz_1	402	402	40	24	23	22.080	0.851	0.569	0.466	0.553	0.538	0	0	1	0	0	0	C2m=	C2	(a.25.1.1,g.41.5.1)*2
1yvr_1	520	520	48	31	22	32.736	0.906	0.492	0.421	0.456	0.466	0	1	0	0	0	0	A1m	A	(a.118.25.1,c.62.1.5)*1
1yvs_1	324	324	43	43	17	31.433	0.717	0.435	0.304	0.547	0.379	0	1	0	0	0	0	C3	C3	(d.1.1.2)*3
1yw9_1	369	369	38	32	26	31.616	0.655	0.550	0.355	0.620	0.460	0	0	1	0	0	0	A1m	A	(d.127.1.1,a.4.5.25)*1
1yy3_1	315	315	38	25	22	20.900	0.809	0.443	0.370	0.537	0.413	0	1	0	0	0	0	A1o	A	(e.53.1.0)*1
1yyf_1	7056	7056	162	66	65	694.980	1.237	0.379	0.292	0.065	0.332	1	0	0	0	0	0	D4+	D6	(c.37.1.20)*12+(d.153.1.4)*12
1yzm_1	46	46	24	10	7	1.680	1.412	0.629	0.565	0.516	0.606	0	0	1	1	0	0	A1o	A	(a.2.19.1)*1
1yzy_1	412	412	41	25	22	22.550	0.872	0.445	0.424	0.438	0.440	0	1	0	0	0	0	A1o	A	(c.146.1.1)*1
1z0g_1	1174	1174	56	52	34	99.008	0.651	0.370	0.331	0.078	0.356	0	1	0	0	0	0	C4+	C6	(d.14.1.0)*6
1z0j_1	220	220	32	24	19	14.592	0.744	0.592	0.421	0.575	0.513	0	0	1	0	0	0	A2	A	(a.2.19.1)*1+(c.37.1.8)*1
1z0p_1	146	146	28	23	16	10.304	0.718	0.565	0.390	0.481	0.488	0	0	1	0	0	0	C2o=	C2	(a.2.18.1)*2
1z1a_2	119	119	32	15	13	6.240	1.143	0.597	0.478	0.560	0.545	0	0	1	0	0	0	A1o	A	(d.339.1.1)*1
1z21_1	96	96	25	18	12	5.400	0.833	0.624	0.476	0.611	0.557	0	0	1	0	0	0	A1o	A	(a.243.1.2)*1
1z2u_1	150	150	32	17	14	7.616	1.032	0.623	0.490	0.562	0.558	0	0	1	0	0	0	A1o	A	(d.20.1.1)*1
1z3e_1	186	186	32	27	17	14.688	0.727	0.480	0.357	0.614	0.427	0	1	0	0	0	0	A2	A	(a.60.3.1)*1+(c.47.1.12)*1
1z3x_1	236	236	39	22	18	15.444	0.975	0.569	0.432	0.690	0.518	0	0	1	0	0	0	A1m	A	(a.118.1.22,a.261.1.1)*1
1z45_1	1348	1348	93	49	36	164.052	1.094	0.341	0.244	0.236	0.296	1	0	0	0	0	0	C2m=	C2	(c.2.1.2,b.30.5.4)*2
1z52_1	901	901	64	34	33	71.808	0.955	0.381	0.344	0.119	0.366	0	1	0	0	0	0	C2m=	C2	(d.169.1.0,f.8.1.1)*2
1z5b_1	926	926	56	45	42	105.840	0.644	0.471	0.295	0.490	0.394	1	0	0	0	0	0	C2m=	C2	(d.122.1.2,a.156.1.3,d.14.1.3)*2
1z5y_1	254	254	41	21	19	16.359	1.025	0.487	0.395	0.564	0.452	0	1	0	0	0	0	A2	A	(b.1.17.1)*1+(c.47.1.10)*1
1z67_1	127	127	31	20	15	9.300	0.886	0.468	0.339	0.522	0.412	0	1	0	0	0	0	A1o	A	(a.259.1.1)*1
1z6r_1	764	764	50	47	31	72.850	0.641	0.467	0.316	0.564	0.401	0	1	0	0	0	0	C2m=	C2	(a.4.5.63,c.55.1.10,c.55.1.10)*2
1z8u_2	226	226	37	25	22	20.350	0.787	0.543	0.343	0.463	0.448	0	0	1	0	0	0	A2	A	(a.1.1.2)*1+(a.7.11.1)*1
1z92_1	244	244	43	23	21	20.769	0.977	0.497	0.351	0.612	0.433	0	1	0	0	0	0	A2	A	(a.26.1.2)*1+(g.18.1.1,g.18.1.1)*1
1z94_1	570	570	38	35	31	41.230	0.576	0.469	0.379	0.214	0.428	0	1	0	0	0	0	D2	D2	(d.129.3.5)*4
1z96_1	38	38	12	9	9	0.972	0.667	0.617	0.607	0.688	0.627	0	0	1	1	0	0	A1o	A	(a.5.2.1)*1
1z9d_1	238	238	29	26	19	14.326	0.644	0.440	0.398	0.432	0.429	0	1	0	0	0	0	A1o	A	(c.73.1.3)*1
1za3_1	543	543	51	42	24	51.408	0.773	0.343	0.270	0.368	0.314	1	0	0	0	0	0	A3	A	(b.1.1.1,b.1.1.2)*2+(g.24.1.1,g.24.1.1,g.24.1.1)*1
1zao_1	271	271	40	24	19	18.240	0.930	0.537	0.405	0.566	0.481	0	0	1	0	0	0	A1m	A	(a.4.5.56,d.144.1.9)*1
1zat_1	248	248	50	22	16	17.600	1.316	0.533	0.375	0.679	0.464	0	0	1	0	0	0	A1m	A	(d.335.1.1,b.160.1.1)*1
1zav_1	353	353	58	26	19	28.652	1.289	0.358	0.312	0.335	0.340	0	1	0	0	0	0	A4+	A	(a.108.1.1)*6+(d.58.62.1)*1
1zbd_1	301	301	48	27	18	23.328	1.067	0.508	0.368	0.604	0.452	0	0	1	0	0	0	A2	A	(c.37.1.8)*1+(g.50.1.1)*1
1zbp_1	266	266	37	25	19	17.575	0.841	0.554	0.411	0.579	0.493	0	0	1	0	0	0	A1o	A	(e.61.1.1)*1
1zbx_1	317	317	44	34	24	35.904	0.759	0.427	0.284	0.567	0.366	1	0	0	0	0	0	A2	A	(b.34.12.1)*1+(d.339.1.1)*1
1zc3_1	282	282	40	27	19	20.520	0.870	0.531	0.394	0.490	0.473	0	0	1	0	0	0	A2	A	(b.55.1.1)*1+(c.37.1.8)*1
1zck_1	454	454	35	35	26	31.850	0.574	0.478	0.385	0.324	0.433	0	1	0	0	0	0	C3	C3	(c.45.1.1)*3
1zd0_1	141	141	33	20	17	11.220	0.892	0.488	0.335	0.676	0.420	0	1	0	0	0	0	A1o	A	(d.329.1.1)*1
1zdy_1	301	301	27	26	20	14.040	0.587	0.543	0.511	0.218	0.532	0	0	1	1	0	0	A1o	A	(d.313.1.1)*1
1ze3_1	443	443	51	38	21	40.698	0.864	0.461	0.308	0.612	0.396	0	1	0	0	0	0	A3	A	(b.1.11.1,b.7.2.1)*1+(b.167.1.1)*1+(b.2.3.2)*1
1zei_1	318	318	29	26	22	16.588	0.604	0.503	0.464	0.179	0.480	0	0	1	0	0	0	D3	D3	(g.1.1.1)*6
1zel_2	295	295	45	22	20	19.800	1.071	0.554	0.393	0.655	0.480	0	0	1	0	0	0	A1m	A	(a.4.5.83,d.377.1.1)*1
1zfj_1	1908	1908	80	78	38	237.120	0.690	0.307	0.215	0.097	0.266	1	0	0	0	0	0	C4+	C4	(c.1.5.1,d.37.1.1)*4
1zhq_1	226	226	25	23	23	13.225	0.543	0.567	0.453	0.315	0.517	0	0	1	0	0	0	C2m=	C2	(d.230.7.1,d.230.7.1)*2
1zhv_1	134	134	27	23	16	9.936	0.692	0.537	0.363	0.601	0.464	0	0	1	0	0	0	A1m	A	(d.58.18.8,d.58.18.8)*1
1zhx_1	436	436	37	31	26	29.822	0.649	0.546	0.410	0.373	0.487	0	0	1	0	0	0	A1o	A	(d.338.1.1)*1
1zin_1	217	217	29	24	19	13.224	0.674	0.470	0.423	0.493	0.461	0	1	0	0	0	0	A1m	A	(c.37.1.1,g.41.2.1)*1
1zjc_1	826	826	60	29	27	46.980	1.071	0.469	0.450	0.411	0.467	0	1	0	0	0	0	C2o=	C2	(e.60.1.1)*2
1zjk_1	390	390	69	26	21	37.674	1.468	0.348	0.273	0.215	0.318	1	0	0	0	0	0	A1m	A	(g.18.1.1,g.18.1.1,b.47.1.2)*1
1zk4_1	1004	1004	44	41	31	55.924	0.611	0.572	0.467	0.328	0.533	0	0	1	0	0	0	D2	D2	(c.2.1.2)*4
1zke_2	165	165	39	15	12	7.020	1.444	0.593	0.536	0.503	0.569	0	0	1	1	0	0	C2o=	C2	(a.30.6.1)*2
1zl0_1	306	306	30	24	21	15.120	0.667	0.544	0.461	0.564	0.511	0	0	1	0	0	0	A1m	A	(c.23.16.7,c.8.10.1)*1
1zlh_1	375	375	35	25	21	18.375	0.761	0.585	0.512	0.566	0.564	0	0	1	1	0	0	A2	A	(c.56.5.1)*1+(g.9.1.3,g.9.1.3)*1
1zoy_1	1092	1092	69	36	34	84.456	0.986	0.509	0.372	0.539	0.451	0	0	1	0	0	0	A4+	A	(c.3.1.4,d.168.1.1,a.7.3.1)*1+(d.15.4.2,a.1.2.1)*1+(f.21.2.2)*2
1zps_1	252	252	29	23	20	13.340	0.674	0.556	0.465	0.516	0.521	0	0	1	0	0	0	C2o=	C2	(b.168.1.1)*2
1zpw_1	82	82	21	17	11	3.927	0.750	0.555	0.474	0.556	0.528	0	0	1	0	0	0	A1o	A	(d.58.58.1)*1
1zq1_1	1890	1890	92	54	53	263.304	0.860	0.260	0.206	0.142	0.242	1	0	0	0	0	0	C2m≠	C2	(b.38.3.1,c.88.1.1)*2+(d.128.1.5,d.74.4.1,a.182.1.2)*2
1zq7_1	813	813	67	44	21	61.908	1.031	0.469	0.356	0.568	0.428	0	1	0	0	0	0	D2	D2	(d.309.1.1)*4
1zro_1	1176	1176	91	48	41	179.088	1.022	0.297	0.214	0.412	0.264	1	0	0	0	0	0	C2m=	C2	(a.264.1.1,a.264.1.1)*2
1zrs_1	588	588	46	33	23	34.914	0.821	0.567	0.450	0.475	0.518	0	0	1	0	0	0	C2m=	C2	(c.23.16.7,c.8.10.1)*2
1zru_1	758	758	49	43	41	86.387	0.583	0.312	0.243	0.470	0.297	1	0	0	0	0	0	C3	C3	(b.163.1.2,b.108.1.4,b.21.1.3)*3
1zso_1	315	315	46	23	19	20.102	1.095	0.556	0.434	0.343	0.503	0	0	1	0	0	0	C2o=	C2	(b.166.1.1)*2
1zsq_1	513	513	43	30	26	33.540	0.768	0.547	0.420	0.462	0.491	0	0	1	0	0	0	A1m	A	(b.55.1.8,c.45.1.3)*1
1zsw_1	328	328	41	30	24	29.520	0.759	0.544	0.344	0.626	0.451	0	0	1	0	0	0	A1m	A	(d.32.1.10,d.32.1.10)*1
1zt2_1	534	534	67	37	25	61.975	1.081	0.318	0.252	0.441	0.292	1	0	0	0	0	0	A2	A	(a.262.1.1)*1+(d.264.1.1)*1
1zt3_1	80	80	23	18	13	5.382	0.742	0.535	0.393	0.699	0.475	0	0	1	0	0	0	A1o	A	(g.28.1.1)*1
1ztb_1	388	388	40	31	22	27.280	0.755	0.526	0.373	0.567	0.461	0	0	1	0	0	0	A1o	A	(d.258.1.0)*1
1zun_1	598	598	41	37	29	43.993	0.621	0.526	0.387	0.413	0.464	0	0	1	0	0	0	A2	A	(c.26.2.2)*1+(c.37.1.8,b.43.3.1,b.44.1.1)*1
1zwy_1	690	690	42	36	32	48.384	0.618	0.513	0.407	0.236	0.468	0	0	1	0	0	0	D2	D2	(c.51.4.0)*3+(c.51.4.3)*1
1zxx_1	1276	1276	54	45	40	97.200	0.635	0.516	0.379	0.278	0.460	0	0	1	0	0	0	D2	D2	(c.89.1.0)*4
1zy9_1	526	526	37	32	23	27.232	0.673	0.615	0.507	0.650	0.572	0	0	1	1	0	0	A1m	A	(b.30.5.11,c.1.8.13)*1
1zym_1	495	495	68	24	23	37.536	1.447	0.431	0.347	0.577	0.410	0	1	0	0	0	0	C2m=	C2	(c.8.1.2,a.60.10.1)*2
1zzk_1	80	80	23	15	13	4.485	0.821	0.572	0.443	0.565	0.518	0	0	1	0	0	0	A1o	A	(d.51.1.0)*1
256b_1	106	106	26	14	13	4.732	0.963	0.541	0.518	0.495	0.542	0	0	1	1	0	0	A1o	A	(a.24.3.1)*1
2a19_1	632	632	72	35	29	73.080	1.125	0.398	0.260	0.580	0.332	1	0	0	0	0	0	A3	A	(b.40.4.0,a.60.14.0)*1+(d.144.1.0)*2
2a1a_1	862	862	94	33	32	99.264	1.446	0.367	0.262	0.414	0.323	1	0	0	0	0	0	C2m≠	C2	(b.40.4.0,a.60.14.0)*2+(d.144.1.0)*2
2a1t_1	2100	2100	71	56	50	198.800	0.670	0.436	0.304	0.521	0.375	0	1	0	0	0	0	A4+	A	(c.26.2.3)*1+(c.26.2.3,c.31.1.0)*1+(e.6.1.1,a.29.3.0)*4
2a1v_1	138	138	23	22	17	8.602	0.590	0.584	0.435	0.561	0.520	0	0	1	0	0	0	A1o	A	(d.198.3.1)*1
2a26_1	94	94	32	14	13	5.824	1.185	0.566	0.438	0.312	0.508	0	0	1	0	0	0	C2o=	C2	(a.2.16.1)*2
2a2l_1	1152	1152	45	45	28	56.700	0.616	0.464	0.471	0.089	0.459	0	1	0	0	1	0	D4+	D4	(d.110.9.1)*8
2a5y_1	1047	1047	68	48	33	107.712	0.840	0.436	0.297	0.509	0.378	1	0	0	0	0	0	A3	A	(a.77.1.3,c.37.1.20,a.4.5.80)*1+(c.37.1.20,a.4.5.80)*1+(f.1.4.1)*1
2a65_1	509	509	43	28	26	31.304	0.796	0.576	0.460	0.563	0.530	0	0	1	0	0	0	A1o	A	(f.54.1.1)*1
2a6q_1	228	228	34	23	19	14.858	0.810	0.478	0.400	0.553	0.450	0	1	0	0	0	0	A3	A	(d.298.1.1)*1+(d.306.1.1)*2
2a6t_1	230	230	40	26	22	22.880	0.833	0.416	0.288	0.554	0.358	1	0	0	0	0	0	A1m	A	(a.242.1.1,d.113.1.7)*1
2a72_1	266	266	52	21	20	21.840	1.268	0.466	0.341	0.388	0.409	0	1	0	0	0	0	C2o=	C2	(a.91.1.0)*2
2a8k_1	94	94	21	18	14	5.292	0.656	0.553	0.441	0.615	0.510	0	0	1	0	0	0	A1o	A	(d.243.1.2)*1
2a90_1	160	160	27	21	15	8.505	0.750	0.534	0.452	0.636	0.506	0	0	1	0	0	0	A1m	A	(d.289.1.1,d.289.1.1)*1
2a9d_1	728	728	48	43	32	66.048	0.640	0.506	0.334	0.528	0.433	0	0	1	0	0	0	C2m=	C2	(d.176.1.1,b.1.18.6)*2
2a9s_1	332	332	31	25	20	15.500	0.689	0.593	0.511	0.515	0.569	0	0	1	1	0	0	C2o=	C2	(c.51.5.1)*2
2a9u_1	261	261	63	25	24	37.800	1.286	0.293	0.205	0.103	0.249	1	0	0	0	0	0	C2o=	C2	(a.118.23.1)*2
2aaf_1	1626	1626	51	49	47	117.453	0.531	0.367	0.367	0.044	0.369	0	1	0	0	1	0	D2	D2	(d.126.1.4)*4
2ab5_1	518	518	48	40	35	67.200	0.640	0.474	0.275	0.546	0.385	1	0	0	0	0	0	C2m=	C2	(d.95.2.0,d.95.2.0)*2
2adf_1	616	616	57	31	25	44.175	1.018	0.402	0.351	0.376	0.381	0	1	0	0	0	0	A3	A	(b.1.1.0)*1+(b.1.1.1,b.1.1.2)*1+(c.62.1.1)*1
2adm_1	385	385	46	28	26	33.488	0.852	0.454	0.340	0.512	0.408	0	1	0	0	0	0	A1m	A	(c.66.1.27,d.287.1.1)*1
2ae0_1	335	335	43	26	20	22.360	0.935	0.512	0.414	0.498	0.474	0	0	1	0	0	0	A1o	A	(b.52.1.4)*1
2aen_1	1312	1312	89	56	50	249.200	0.840	0.242	0.163	0.392	0.212	1	0	0	0	0	0	A4+	A	(b.29.1.0)*8
2afh_1	2572	2572	84	58	55	267.960	0.743	0.473	0.310	0.569	0.403	0	1	0	0	0	0	A4+	A	(c.37.1.10)*2+(c.92.2.3)*4
2ahm_1	1968	1968	67	57	54	206.226	0.604	0.289	0.267	0.011	0.276	1	0	0	0	0	0	D2	D2	(a.8.9.1)*8+(d.302.1.1)*8
2aho_1	660	660	74	39	26	75.036	1.138	0.328	0.256	0.287	0.299	1	0	0	0	0	0	A2	A	(b.40.4.5,a.60.14.1,d.58.51.1)*1+(c.37.1.8,b.43.3.1,b.44.1.1)*1
2ahr_1	2574	2574	64	61	58	226.432	0.538	0.437	0.308	0.211	0.368	0	1	0	0	0	0	D4+	D5	(c.2.1.6,a.100.1.10)*10
2ahu_1	2060	2060	72	64	51	235.008	0.626	0.402	0.264	0.328	0.342	1	0	0	0	0	0	D2	D2	(c.124.1.2,c.124.1.3)*4
2aib_1	196	196	32	19	18	10.944	0.865	0.447	0.414	0.419	0.442	0	1	0	0	0	0	C2o=	C2	(a.134.1.1)*2
2aio_1	1064	1064	46	46	44	93.104	0.511	0.480	0.337	0.315	0.420	0	1	0	0	0	0	D2	D2	(d.157.1.1)*4
2aj7_1	306	306	40	35	18	25.200	0.755	0.526	0.355	0.461	0.447	0	0	1	0	0	0	C2o=	C2	(b.158.1.1)*2
2aja_2	345	345	58	30	24	41.760	1.074	0.433	0.259	0.642	0.354	1	0	0	0	0	0	A1o	A	(a.118.24.1)*1
2ala_1	384	384	80	27	15	32.400	1.905	0.434	0.313	0.596	0.380	0	1	0	0	0	0	A1m	A	(f.10.1.1,b.1.18.0)*1
2aly_1	2102	2102	105	62	47	305.970	0.963	0.371	0.222	0.477	0.310	1	0	0	0	0	0	C2m≠	C2	(a.6.1.1,b.40.4.4,b.153.1.1,a.6.1.1,d.104.1.1,d.58.13.1)*2+(d.104.1.1)*2
2ap3_1	192	192	59	16	13	12.272	2.034	0.500	0.401	0.317	0.455	0	0	1	0	0	1	A1o	A	(a.24.27.1)*1
2apl_1	149	149	37	17	15	9.435	1.156	0.535	0.416	0.639	0.491	0	0	1	0	0	0	A1o	A	(a.258.1.1)*1
2apo_1	359	359	39	35	20	27.300	0.709	0.458	0.351	0.637	0.417	0	1	0	0	0	0	A2	A	(d.265.1.2,b.122.1.1)*1+(g.41.16.1)*1
2aq2_1	344	344	39	27	25	26.325	0.750	0.509	0.378	0.602	0.457	0	0	1	0	0	0	A2	A	(b.1.1.1)*1+(b.40.2.2,d.15.6.1)*1
2arh_1	584	584	40	38	29	44.080	0.597	0.451	0.367	0.494	0.422	0	1	0	0	0	0	C3	C3	(d.108.1.9)*3
2ass_1	537	537	53	36	26	49.608	0.855	0.364	0.291	0.475	0.337	1	0	0	0	0	0	A3	A	(a.158.1.1,c.10.1.3)*1+(d.42.1.1,a.157.1.1)*1+(d.97.1.1)*1
2au5_1	129	129	28	24	16	10.752	0.700	0.569	0.357	0.586	0.468	0	0	1	0	0	0	A1o	A	(a.244.1.1)*1
2aua_1	409	409	43	39	23	38.571	0.694	0.446	0.307	0.553	0.379	0	1	0	0	0	0	C2o=	C2	(d.166.1.6)*2
2aus_1	728	728	65	39	29	73.515	0.956	0.394	0.285	0.324	0.347	1	0	0	0	0	0	C2m≠	C2	(d.265.1.0,b.122.1.0)*2+(g.41.16.1)*2
2auw_1	306	306	57	34	24	46.512	0.983	0.323	0.211	0.482	0.273	1	0	0	0	0	0	A2	A	(d.331.1.1,a.35.1.10)*2
2av5_1	106	106	20	19	11	4.180	0.667	0.577	0.559	0.561	0.572	0	0	1	1	0	0	A1o	A	(d.58.59.1)*1
2avu_1	672	672	49	38	26	48.412	0.766	0.408	0.371	0.266	0.398	0	1	0	0	0	0	C2o≠	C2	(a.145.1.1)*4+(e.64.1.1)*2
2awo_1	746	746	46	42	37	71.484	0.582	0.466	0.308	0.334	0.391	0	1	0	0	0	0	C2m=	C2	(c.37.1.12,b.40.6.3)*2
2axv_1	1209	1209	76	45	39	133.380	0.905	0.416	0.274	0.302	0.350	1	0	0	0	0	0	D2	D2	(a.35.1.0,a.118.8.4)*4
2ayd_1	76	76	21	14	11	3.234	0.840	0.582	0.492	0.574	0.544	0	0	1	0	0	0	A1o	A	(g.79.1.0)*1
2b0a_1	372	372	38	26	20	19.760	0.826	0.600	0.504	0.528	0.562	0	0	1	1	0	0	C2o=	C2	(c.8.8.1)*2
2b0o_1	530	530	37	36	31	41.292	0.552	0.467	0.373	0.331	0.434	0	1	0	0	0	0	C2m=	C2	(g.45.1.0,d.211.1.0)*2
2b0t_1	735	735	47	35	35	57.575	0.671	0.399	0.341	0.216	0.381	0	1	0	0	0	0	A1o	A	(c.77.1.2)*1
2b1y_1	202	202	50	25	18	22.500	1.163	0.299	0.223	0.177	0.266	1	0	0	0	0	0	C2o=	C2	(b.156.1.1)*2
2b2y_1	430	430	52	32	23	38.272	0.945	0.450	0.331	0.283	0.395	0	1	0	0	0	0	A3	A	(b.34.13.2)*1+(b.34.13.2,b.34.13.2)*2
2b3t_1	576	576	54	46	25	62.100	0.761	0.392	0.270	0.538	0.343	1	0	0	0	0	0	A2	A	(c.66.1.30)*1+(e.38.1.1)*1
2b4j_1	444	444	54	28	25	37.800	1.019	0.521	0.348	0.463	0.442	0	0	1	0	0	0	C2o≠	C2	(a.48.4.1)*2+(c.55.3.2)*2
2b4s_1	1161	1161	82	41	36	121.032	1.065	0.380	0.279	0.567	0.340	1	0	0	0	0	0	C2o≠	C2	(c.45.1.2)*2+(d.144.1.7)*2
2b5d_1	2072	2072	64	48	44	135.168	0.696	0.344	0.408	0.068	0.381	0	1	0	0	1	0	D2	D2	(c.6.2.4,a.8.3.3)*4
2b5e_1	483	483	62	35	31	67.270	0.939	0.267	0.206	0.086	0.238	1	0	0	0	0	0	A1m	A	(c.47.1.2,c.47.1.2,c.47.1.2,c.47.1.2)*1
2b5l_2	1309	1309	76	53	36	145.008	0.854	0.405	0.278	0.528	0.350	1	0	0	0	0	0	A2	A	(b.69.4.3,b.69.4.3,b.69.4.3,a.297.1.1)*1+(d.384.1.1)*1
2b5m_1	1119	1119	62	55	36	122.760	0.681	0.374	0.271	0.400	0.337	1	0	0	0	0	0	A1m	A	(b.69.4.3,b.69.4.3,b.69.4.3,a.297.1.1)*1
2b5u_1	554	554	83	44	26	94.952	1.186	0.222	0.165	0.308	0.197	1	0	0	0	0	0	A2	A	(b.110.1.1,h.4.9.1,b.101.1.1)*1+(d.26.2.1)*1
2b78_1	376	376	39	29	21	23.751	0.780	0.514	0.433	0.513	0.482	0	0	1	0	0	0	A1m	A	(b.122.1.9,c.66.1.51)*1
2b7n_1	1638	1638	55	53	33	96.195	0.640	0.501	0.439	0.224	0.469	0	0	1	0	0	0	D3	D3	(d.41.2.0,c.1.17.0)*6
2b8e_3	254	254	40	21	16	13.440	1.081	0.497	0.439	0.287	0.471	0	1	0	0	0	0	A1m	A	(c.108.1.7,d.220.1.1)*1
2b97_1	70	70	15	14	11	2.310	0.600	0.676	0.572	0.724	0.632	0	0	1	1	0	0	A1o	A	(b.138.1.1)*1
2b9d_1	104	104	21	20	12	5.040	0.656	0.480	0.455	0.220	0.464	0	1	0	0	0	0	C2o=	C2	(g.91.1.1)*2
2bas_1	799	799	52	51	30	79.560	0.642	0.457	0.327	0.565	0.408	0	1	0	0	0	0	C2m=	C2	(c.1.33.1,d.110.6.2)*2
2bbh_1	223	223	39	31	22	26.598	0.736	0.448	0.279	0.549	0.374	1	0	0	0	0	0	A1o	A	(d.328.1.1)*1
2bbk_1	960	960	51	37	36	67.932	0.699	0.507	0.396	0.417	0.464	0	0	1	0	0	0	C2o≠	C2	(b.69.2.1)*2+(g.21.1.1)*2
2bcj_1	1344	1344	79	70	44	243.320	0.693	0.200	0.160	0.119	0.182	1	0	0	0	0	0	A4+	A	(a.137.3.1)*1+(a.91.1.1,d.144.1.7,b.55.1.1)*1+(b.69.4.1)*1+(c.37.1.8,a.66.1.1)*1
2bcn_1	696	696	62	34	30	63.240	0.969	0.342	0.306	0.145	0.332	0	1	0	0	0	0	A3	A	(a.3.1.1)*1+(a.93.1.1)*2
2be5_1	3409	3409	102	68	64	443.904	0.773	0.366	0.243	0.365	0.314	1	0	0	0	0	0	A4+	A	(a.143.1.1)*1+(a.177.1.1,a.4.13.1,a.4.13.2)*1+(d.74.3.1,d.181.1.1)*2+(e.29.1.1)*1+(e.29.1.2)*1
2ber_1	601	601	46	36	26	43.056	0.742	0.396	0.347	0.549	0.386	0	1	0	0	0	0	A1m	A	(b.68.1.1,b.1.18.0,b.18.1.0)*1
2bf5_1	92	92	22	17	14	5.236	0.710	0.622	0.471	0.553	0.558	0	0	1	0	0	0	A1o	A	(d.137.1.1)*1
2bh1_1	306	306	34	29	26	25.636	0.618	0.516	0.354	0.466	0.445	0	0	1	0	0	0	A2	A	(c.55.1.11,c.55.1.0)*1+(d.52.10.1)*1
2bhu_1	580	580	45	29	25	32.625	0.833	0.577	0.476	0.570	0.540	0	0	1	0	0	0	A1m	A	(b.1.18.2,c.1.8.1,b.71.1.1)*1
2bhw_1	669	669	46	45	35	72.450	0.575	0.238	0.238	0.009	0.239	1	0	0	0	1	0	C3	C3	(f.43.1.1)*3
2bi0_1	990	990	46	46	34	71.944	0.575	0.519	0.389	0.476	0.470	0	0	1	0	0	0	C3	C3	(d.38.1.4,d.38.1.4)*3
2bib_1	541	541	83	35	27	78.435	1.339	0.318	0.222	0.156	0.273	1	0	0	0	0	0	A1m	A	(d.157.1.8,b.109.1.1)*1
2bj7_1	550	550	51	28	24	34.272	0.981	0.545	0.444	0.627	0.512	0	0	1	0	0	0	C2m=	C2	(a.43.1.3,d.58.18.4)*4
2bjf_1	1312	1312	62	56	33	114.576	0.697	0.543	0.365	0.408	0.463	0	0	1	0	0	0	D2	D2	(d.153.1.0)*4
2bji_1	550	550	42	28	25	29.400	0.792	0.531	0.468	0.519	0.510	0	0	1	0	0	0	C2o=	C2	(e.7.1.1)*2
2bjm_1	920	920	46	45	26	53.820	0.648	0.419	0.421	0.057	0.415	0	1	0	0	1	0	D4+	D4	(b.1.1.1)*8
2bjq_1	340	340	35	26	25	22.750	0.686	0.508	0.407	0.517	0.468	0	0	1	0	0	0	A1m	A	(b.169.1.1,b.169.1.1)*1
2bkp_1	388	388	37	32	29	34.336	0.607	0.516	0.339	0.321	0.434	0	0	1	0	0	0	C2m=	C2	(a.7.12.1,d.286.1.1)*2
2bku_1	1026	1026	58	45	37	96.570	0.707	0.274	0.275	0.279	0.285	1	0	0	0	1	0	A2	A	(a.118.1.1)*1+(c.37.1.8)*1
2bky_1	350	350	38	29	20	22.040	0.776	0.565	0.427	0.476	0.499	0	0	1	0	0	0	C2o=	C2	(d.68.6.1)*4
2bl8_1	93	93	21	19	12	4.788	0.677	0.523	0.462	0.435	0.506	0	0	1	0	0	0	A1o	A	(a.29.8.2)*1
2bln_1	298	298	42	23	19	18.354	1.000	0.524	0.415	0.333	0.473	0	0	1	0	0	0	A1m	A	(c.65.1.1,b.46.1.1)*1
2bm5_1	364	364	68	18	16	19.584	2.000	0.538	0.463	0.629	0.516	0	0	1	0	0	1	C2o=	C2	(b.80.8.1)*2
2bm7_1	1080	1080	74	39	36	103.896	0.987	0.454	0.311	0.527	0.393	0	1	0	0	0	0	D3	D3	(b.80.8.1)*6
2bmu_1	1353	1353	52	51	37	98.124	0.591	0.513	0.388	0.094	0.452	0	0	1	0	0	0	D3	D3	(c.73.1.3)*6
2bnk_1	128	128	31	16	15	7.440	1.000	0.565	0.461	0.512	0.530	0	0	1	0	0	0	C2o=	C2	(a.251.1.1)*2
2bnm_1	776	776	50	39	34	66.300	0.685	0.349	0.312	0.013	0.324	0	1	0	0	0	0	D2	D2	(a.35.1.3,b.82.1.10)*4
2bo3_1	184	184	42	32	21	28.224	0.792	0.450	0.225	0.436	0.344	1	0	0	0	0	0	C2o=	C2	(a.292.1.1)*2
2bo9_1	1048	1048	71	43	32	97.696	0.947	0.468	0.332	0.464	0.414	0	1	0	0	0	0	A4+	A	(c.56.5.1)*2+(d.17.1.5,d.17.1.5)*2
2boe_1	281	281	31	21	20	13.020	0.756	0.566	0.495	0.616	0.545	0	0	1	0	0	0	A1o	A	(c.6.1.1)*1
2bs2_1	2302	2302	76	75	43	245.100	0.644	0.461	0.291	0.195	0.372	1	0	0	0	0	0	C2m≠	C2	(c.3.1.4,d.168.1.1,a.7.3.1)*2+(d.15.4.2,a.1.2.1)*2+(f.21.2.1)*2
2bsy_1	249	249	26	24	21	13.104	0.578	0.530	0.460	0.605	0.509	0	0	1	0	0	0	A1m	A	(b.85.4.1,b.85.4.1)*1
2btc_1	252	252	27	23	19	11.799	0.643	0.618	0.509	0.710	0.580	0	0	1	1	0	0	A2	A	(b.47.1.2)*1+(g.3.2.1)*1
2btd_1	209	209	29	20	16	9.280	0.806	0.611	0.530	0.531	0.583	0	0	1	1	0	0	A1o	A	(a.208.1.0)*1
2bti_1	117	117	28	22	14	8.624	0.778	0.545	0.377	0.538	0.468	0	0	1	0	0	0	C2o=	C2	(b.151.1.1)*2
2bto_1	2817	2817	65	64	62	257.920	0.516	0.367	0.305	0.356	0.348	0	1	0	0	0	0	A4+	A	(c.32.1.1,d.79.2.1)*6+(c.47.1.1)*3
2bw3_1	1204	1204	65	48	39	121.680	0.747	0.305	0.277	0.111	0.292	1	0	0	0	0	0	C2m≠	C2	(a.270.1.1)*2+(a.270.1.1,c.55.3.12)*2
2bwv_1	1760	1760	63	58	45	164.430	0.612	0.342	0.292	0.097	0.318	1	0	0	0	0	0	D2	D2	(c.55.2.1,d.127.1.1)*4
2bxx_1	134	134	28	19	16	8.512	0.800	0.474	0.383	0.618	0.439	0	1	0	0	0	0	A1o	A	(b.148.1.1)*1
2bz1_1	348	348	34	27	20	18.360	0.723	0.550	0.469	0.456	0.524	0	0	1	0	0	0	C2o=	C2	(c.144.1.1)*2
2c0g_1	228	228	38	24	19	17.328	0.884	0.457	0.349	0.443	0.414	0	1	0	0	0	0	A1m	A	(c.47.1.7,a.71.1.0)*1
2c0l_1	414	414	47	33	21	32.571	0.870	0.440	0.348	0.400	0.401	0	1	0	0	0	0	A2	A	(a.118.8.1)*1+(d.106.1.1)*1
2c1i_1	383	383	64	26	19	31.616	1.422	0.441	0.337	0.310	0.398	0	1	0	0	0	0	A1m	A	(d.341.1.1,c.6.2.3)*1
2c1v_1	670	670	56	34	28	53.312	0.903	0.517	0.366	0.520	0.455	0	0	1	0	0	0	C2m=	C2	(a.3.1.0,a.3.1.0)*2
2c1w_2	276	276	31	24	23	17.112	0.660	0.580	0.457	0.466	0.534	0	0	1	0	0	0	A1o	A	(d.294.1.1)*1
2c2a_1	482	482	47	39	29	53.157	0.691	0.378	0.262	0.551	0.337	1	0	0	0	0	0	C2m=	C2	(a.30.2.1,d.122.1.3)*2
2c2v_1	735	735	94	38	31	110.732	1.362	0.272	0.196	0.542	0.254	1	0	0	0	0	0	C2o≠	C2	(d.20.1.1)*4+(g.44.1.0)*1+(g.44.1.2)*1
2c3b_1	277	277	37	26	19	18.278	0.822	0.571	0.423	0.579	0.508	0	0	1	0	0	0	C2o=	C2	(b.62.1.1)*2
2c42_1	2462	2462	70	52	49	178.360	0.693	0.560	0.399	0.489	0.490	0	0	1	0	0	0	C2m=	C2	(c.36.1.8,c.48.1.3,c.64.1.1,d.58.1.5,c.36.1.12)*2
2c4b_1	142	142	31	20	14	8.680	0.912	0.491	0.376	0.551	0.440	0	1	0	0	0	0	A1m	A	(d.1.1.2,g.3.2.1)*1
2c4k_1	305	305	34	27	21	19.278	0.708	0.499	0.397	0.615	0.458	0	1	0	0	0	0	A1m	A	(c.61.1.2,c.61.1.2)*1
2c71_1	205	205	25	22	18	9.900	0.625	0.592	0.505	0.594	0.568	0	0	1	1	0	0	A1o	A	(c.6.2.3)*1
2ca5_1	62	62	38	15	7	3.990	1.727	0.488	0.356	0.475	0.431	0	1	0	0	0	0	A1o	A	(a.2.20.1)*1
2car_1	390	390	43	30	21	27.090	0.843	0.498	0.383	0.601	0.452	0	1	0	0	0	0	C2o≠	C2	(c.51.4.0)*1+(c.51.4.1)*1
2cay_1	526	526	43	39	37	62.049	0.566	0.448	0.280	0.270	0.371	1	0	0	0	0	0	D2	D2	(b.55.1.12)*4
2caz_1	225	225	44	26	19	21.736	0.978	0.489	0.310	0.653	0.413	0	1	0	0	0	0	A3	A	(a.2.17.1)*1+(a.2.17.2)*1+(a.2.17.3)*1
2cb8_1	86	86	23	17	11	4.301	0.821	0.577	0.489	0.794	0.545	0	0	1	0	0	0	A1o	A	(a.11.1.1)*1
2cc0_1	384	384	33	26	21	18.018	0.702	0.548	0.474	0.324	0.515	0	0	1	0	0	0	C2o=	C2	(c.6.2.3)*2
2ccq_1	99	99	22	16	13	4.576	0.759	0.634	0.534	0.624	0.594	0	0	1	1	0	0	A1o	A	(d.314.1.1)*1
2ce2_1	166	166	22	21	19	8.778	0.550	0.618	0.491	0.647	0.564	0	0	1	0	0	0	A1o	A	(c.37.1.8)*1
2cg6_1	180	180	40	24	15	14.400	1.026	0.497	0.335	0.585	0.429	0	1	0	0	0	0	C2m=	C2	(g.27.1.1,g.27.1.1)*2
2cg7_1	90	90	36	12	11	4.752	1.565	0.626	0.467	0.634	0.560	0	0	1	0	0	0	A1m	A	(g.27.1.1,g.27.1.1)*1
2ch4_1	459	459	52	35	26	47.320	0.852	0.409	0.281	0.446	0.354	1	0	0	0	0	0	A2	A	(b.40.7.1)*1+(d.122.1.3,b.40.7.1)*1
2ci1_1	275	275	26	24	22	13.728	0.565	0.563	0.500	0.467	0.540	0	0	1	1	0	0	A1o	A	(d.126.1.0)*1
2ci2_1	390	390	43	43	15	27.735	0.741	0.472	0.405	0.097	0.447	0	1	0	0	0	0	C4+	C6	(d.40.1.1)*6
2ci8_1	198	198	51	19	16	15.504	1.457	0.505	0.361	0.472	0.438	0	0	1	0	0	0	C2o=	C2	(d.93.1.0)*2
2cjt_1	248	248	32	30	17	16.320	0.681	0.491	0.400	0.512	0.460	0	1	0	0	0	0	C2o=	C2	(b.7.1.1)*2
2clt_1	367	367	43	26	22	24.596	0.896	0.460	0.375	0.503	0.426	0	1	0	0	0	0	A1m	A	(d.92.1.11,b.66.1.1)*1
2cly_2	292	292	99	30	20	59.400	1.980	0.193	0.151	0.093	0.174	1	0	0	0	0	0	A3	A	(f.45.1.1)*1+(f.52.1.1)*1+(f.53.1.1)*1
2cme_1	157	157	33	22	15	10.890	0.892	0.556	0.389	0.322	0.480	0	0	1	0	0	0	C2o=	C2	(b.164.1.1)*2
2cn4_1	346	346	47	21	19	18.753	1.175	0.465	0.415	0.459	0.448	0	1	0	0	0	0	C2o=	C2	(d.35.1.1)*2
2cnq_1	301	301	31	26	21	16.926	0.660	0.561	0.469	0.550	0.526	0	0	1	0	0	0	A1o	A	(d.143.1.1)*1
2co6_1	333	333	39	28	19	20.748	0.830	0.523	0.412	0.585	0.478	0	0	1	0	0	0	A2	A	(b.1.11.1,b.7.2.1)*1+(b.2.3.2)*1
2cqz_1	1038	1038	49	48	34	79.968	0.598	0.525	0.398	0.273	0.474	0	0	1	0	0	0	D3	D3	(a.211.1.1)*6
2cs7_1	55	55	18	15	10	2.700	0.720	0.630	0.493	0.396	0.573	0	0	1	0	0	0	A1o	A	(d.9.2.1)*1
2csb_1	517	517	49	31	28	42.532	0.831	0.532	0.360	0.620	0.452	0	0	1	0	0	0	A1m	A	(a.267.1.1,a.60.2.4,a.60.2.4,a.60.2.4,a.60.2.4)*1
2csu_1	869	869	55	38	31	64.790	0.797	0.485	0.368	0.396	0.437	0	1	0	0	0	0	C2m=	C2	(c.2.1.8,c.23.4.1,c.23.4.1)*2
2cu2_1	670	670	75	29	25	54.375	1.389	0.495	0.362	0.584	0.445	0	1	0	0	0	0	C2m=	C2	(c.68.1.20,b.81.4.1)*2
2cu5_1	382	382	30	26	25	19.500	0.588	0.572	0.506	0.292	0.548	0	0	1	1	0	0	C3	C3	(d.273.1.0)*3
2cun_1	810	810	55	44	34	82.280	0.705	0.318	0.280	0.150	0.304	1	0	0	0	0	0	C2o=	C2	(c.86.1.0)*2
2cve_1	190	190	50	16	15	12.000	1.613	0.484	0.395	0.599	0.450	0	1	0	0	0	0	A1m	A	(d.14.1.11,d.58.11.2)*1
2cvz_1	1153	1153	59	52	42	128.856	0.628	0.497	0.275	0.560	0.390	1	0	0	0	0	0	D2	D2	(c.2.1.6,a.100.1.1)*4
2cw4_1	124	124	22	20	14	6.160	0.647	0.571	0.485	0.642	0.545	0	0	1	0	0	0	A1o	A	(d.79.1.1)*1
2cwy_1	94	94	20	14	13	3.640	0.741	0.599	0.567	0.702	0.597	0	0	1	1	0	0	A1o	A	(a.246.2.1)*1
2cx0_1	184	184	30	22	15	9.900	0.811	0.603	0.484	0.634	0.558	0	0	1	0	0	0	A1m	A	(d.17.6.4,b.122.1.1)*1
2cx8_1	398	398	43	34	28	40.936	0.694	0.480	0.295	0.557	0.394	1	0	0	0	0	0	C2m≠	C2	(b.122.1.2,c.116.1.5)*1+(c.116.1.5)*1
2cyj_1	118	118	20	18	13	4.680	0.645	0.593	0.567	0.687	0.586	0	0	1	1	0	0	A1o	A	(c.103.1.1)*1
2cyy_1	302	302	34	26	25	22.100	0.667	0.491	0.372	0.312	0.439	0	1	0	0	0	0	C2m=	C2	(a.4.5.0,d.58.4.2)*2
2cz9_1	346	346	35	30	22	23.100	0.673	0.567	0.422	0.475	0.500	0	0	1	0	0	0	A1m	A	(d.14.1.0,d.58.26.0)*1
2czr_1	226	226	39	29	18	20.358	0.830	0.439	0.317	0.623	0.392	0	1	0	0	0	0	A1o	A	(c.52.4.1)*1
2czv_1	651	651	54	35	22	41.580	0.947	0.546	0.439	0.556	0.506	0	0	1	0	0	0	C2o≠	C2	(c.6.3.2)*2+(d.58.59.1)*2
2d00_1	654	654	54	39	32	67.392	0.761	0.209	0.239	0.011	0.224	1	0	0	0	1	0	C2o=	C2	(c.149.1.1)*6
2d1s_1	539	539	42	30	29	36.540	0.712	0.499	0.410	0.525	0.467	0	1	0	0	0	0	A1o	A	(e.23.1.1)*1
2d1z_1	427	427	48	24	21	24.192	1.067	0.581	0.451	0.670	0.528	0	0	1	0	0	0	A1m	A	(c.1.8.3,b.42.2.0)*1
2d28_1	144	144	26	21	17	9.282	0.684	0.549	0.405	0.694	0.486	0	0	1	0	0	0	A1o	A	(d.52.10.1)*1
2d5b_1	500	500	53	28	24	35.616	1.019	0.542	0.417	0.619	0.494	0	0	1	0	0	0	A1m	A	(c.26.1.1,a.27.1.0)*1
2d5f_1	2307	2307	52	51	51	135.252	0.510	0.468	0.453	0.122	0.466	0	1	0	0	0	0	D3	D3	(b.82.1.0,b.82.1.0)*6
2d5r_1	368	368	41	27	21	23.247	0.854	0.519	0.438	0.636	0.494	0	0	1	0	0	0	A2	A	(c.55.3.9)*1+(d.370.1.1)*1
2d69_1	3342	3342	68	67	65	296.140	0.515	0.396	0.330	0.056	0.364	0	1	0	0	0	0	D4+	D4	(d.58.9.1,c.1.14.1)*8
2dbs_1	162	162	24	21	17	8.568	0.632	0.604	0.483	0.486	0.551	0	0	1	0	0	0	C2o=	C2	(d.374.1.1)*2
2dby_1	355	355	44	32	21	29.568	0.830	0.428	0.330	0.578	0.389	0	1	0	0	0	0	A1m	A	(c.37.1.0,d.15.10.0)*1
2dc4_1	328	328	49	22	20	21.560	1.167	0.486	0.421	0.597	0.472	0	1	0	0	0	0	C2o=	C2	(d.63.1.2)*2
2dd8_1	624	624	68	33	26	58.344	1.153	0.457	0.311	0.602	0.396	0	1	0	0	0	0	A3	A	(b.1.1.1,b.1.1.2)*2+(d.318.1.1)*1
2ddz_1	1130	1130	46	45	41	84.870	0.535	0.538	0.381	0.396	0.459	0	0	1	0	0	0	D3	D3	(d.104.1.4)*6
2dfa_1	988	988	50	47	43	101.050	0.556	0.431	0.288	0.338	0.377	1	0	0	0	0	0	D2	D2	(c.6.2.5)*4
2dge_1	406	406	38	36	29	39.672	0.585	0.464	0.308	0.232	0.385	0	1	0	0	0	0	D2	D2	(a.3.1.0)*4
2dhh_1	3066	3066	85	60	54	275.400	0.746	0.369	0.305	0.091	0.336	0	1	0	0	0	0	C3	C3	(f.35.1.1,d.58.44.1,d.58.44.1,d.225.1.1,f.35.1.1,d.58.44.1,d.58.44.1,d.225.1.1)*3
2di4_1	1053	1053	62	61	19	71.858	0.775	0.491	0.384	0.211	0.442	0	1	0	0	0	0	C4+	C6	(a.269.1.1)*6
2dlb_1	140	140	33	18	15	8.910	1.000	0.585	0.433	0.496	0.518	0	0	1	0	0	0	C2o=	C2	(b.174.1.1)*2
2dm9_1	236	236	45	20	18	16.200	1.184	0.507	0.377	0.534	0.453	0	0	1	0	0	0	C2o=	C2	(d.81.4.1)*2
2dqn_1	988	988	63	43	32	86.688	0.840	0.435	0.318	0.625	0.393	0	1	0	0	0	0	A3	A	(a.137.12.1)*1+(c.117.1.1)*1+(d.128.1.5,a.182.1.2)*1
2dsr_1	219	219	29	27	22	17.226	0.592	0.519	0.342	0.645	0.437	0	0	1	0	0	0	A3	A	(g.1.1.1)*1+(g.28.1.1)*1+(g.3.9.1)*1
2dsx_1	52	52	13	12	10	1.560	0.591	0.640	0.606	0.492	0.637	0	0	1	1	0	0	A1o	A	(g.41.5.1)*1
2dsy_1	314	314	36	30	20	21.600	0.720	0.415	0.381	0.027	0.391	0	1	0	0	0	0	D2	D2	(d.304.1.2)*4
2dt8_1	280	280	34	26	17	15.028	0.791	0.590	0.481	0.473	0.542	0	0	1	0	0	0	A1o	A	(c.119.1.0)*1
2dvn_1	372	372	39	27	24	25.272	0.765	0.517	0.402	0.424	0.466	0	0	1	0	0	0	A2	A	(c.51.4.1)*2
2dwk_1	162	162	34	21	15	10.710	0.944	0.519	0.413	0.690	0.484	0	0	1	0	0	0	A1o	A	(a.256.1.1)*1
2dy1_1	660	660	65	33	32	68.640	1.000	0.309	0.260	0.406	0.292	1	0	0	0	0	0	A1m	A	(c.37.1.8,b.43.3.1,d.58.11.1,d.14.1.1,d.58.11.1)*1
2dyj_1	91	91	21	15	12	3.780	0.778	0.605	0.540	0.592	0.582	0	0	1	1	0	0	A1o	A	(d.52.7.1)*1
2dyn_1	1776	1776	68	64	54	235.008	0.576	0.331	0.260	0.017	0.298	1	0	0	0	0	0	D4+	D4	(b.55.1.1)*16
2e00_1	2742	2742	69	69	53	252.333	0.566	0.345	0.328	0.005	0.337	0	1	0	0	0	0	D3	D3	(d.3.1.1)*6
2e1b_1	216	216	33	22	19	13.794	0.805	0.460	0.400	0.532	0.437	0	1	0	0	0	0	A1m	A	(b.43.3.6,d.67.1.2)*1
2e2a_1	307	307	34	22	22	16.456	0.773	0.580	0.475	0.553	0.538	0	0	1	0	0	0	C3	C3	(a.7.2.1)*3
2e2d_1	345	345	40	27	21	22.680	0.833	0.519	0.414	0.601	0.479	0	0	1	0	0	0	A2	A	(b.40.3.1)*1+(d.92.1.11)*1
2e89_1	631	631	48	38	36	65.664	0.649	0.417	0.289	0.580	0.362	1	0	0	0	0	0	C2m=	C2	(c.26.2.5,d.229.1.1)*2
2eb6_1	2668	2668	65	64	60	249.600	0.524	0.468	0.321	0.119	0.395	0	1	0	0	0	0	D4+	D5	(d.177.1.0)*10
2ec5_1	711	711	57	49	24	67.032	0.781	0.401	0.305	0.501	0.362	0	1	0	0	0	0	A1m	A	(a.296.1.1,c.150.1.2,d.3.1.17)*1
2ed6_1	510	510	34	32	32	34.816	0.531	0.520	0.389	0.305	0.458	0	0	1	0	0	0	C3	C3	(b.170.1.1)*3
2eey_1	960	960	41	41	30	50.430	0.577	0.565	0.487	0.381	0.538	0	0	1	0	0	0	D3	D3	(d.58.21.0)*6
2ef0_1	287	287	30	26	20	15.600	0.652	0.541	0.457	0.630	0.507	0	0	1	0	0	0	A1m	A	(c.78.1.0,c.78.1.0)*1
2ef7_1	506	506	44	40	26	45.760	0.667	0.339	0.286	0.160	0.317	1	0	0	0	0	0	D2	D2	(d.37.1.1)*4
2eho_2	695	695	55	34	29	54.230	0.873	0.462	0.368	0.228	0.420	0	1	0	0	0	0	A4+	A	(a.278.1.1)*1+(a.278.1.4,d.344.1.0)*1+(d.344.1.0,a.278.1.2)*1+(d.344.1.4,a.278.1.3)*1
2ehz_1	2392	2392	56	55	50	154.000	0.533	0.247	0.371	0.000	0.310	1	0	0	0	1	0	D4+	D4	(d.32.1.0,d.32.1.0)*8
2eif_1	133	133	35	18	15	9.450	1.061	0.528	0.370	0.558	0.469	0	0	1	0	0	0	A1m	A	(b.34.5.2,b.40.4.5)*1
2eix_1	486	486	48	33	29	45.936	0.774	0.413	0.325	0.320	0.375	0	1	0	0	0	0	C2m=	C2	(b.43.4.0,c.25.1.0)*2
2ejb_1	352	352	41	22	19	17.138	1.000	0.604	0.498	0.591	0.555	0	0	1	0	0	0	C2o=	C2	(c.34.1.0)*2
2ekm_1	480	480	33	32	25	26.400	0.579	0.569	0.473	0.396	0.533	0	0	1	0	0	0	C3	C3	(d.256.1.0)*3
2elc_1	1316	1316	57	55	46	144.210	0.564	0.369	0.250	0.491	0.319	1	0	0	0	0	0	C2m=	C2	(a.46.2.1,c.27.1.1)*4
2end_1	137	137	27	19	15	7.695	0.794	0.577	0.451	0.561	0.520	0	0	1	0	0	0	A1o	A	(a.18.1.1)*1
2erl_1	40	40	16	9	8	1.152	0.941	0.651	0.590	0.720	0.629	0	0	1	1	0	0	A1o	A	(a.10.1.1)*1
2es4_2	592	592	44	34	30	44.880	0.688	0.523	0.359	0.650	0.454	0	0	1	0	0	0	A2	A	(a.137.15.1)*1+(c.69.1.18)*1
2es9_1	100	100	19	17	14	4.522	0.613	0.588	0.509	0.507	0.563	0	0	1	1	0	0	A1o	A	(a.247.1.1)*1
2etd_1	141	141	36	16	11	6.336	1.333	0.591	0.502	0.627	0.558	0	0	1	1	0	0	A1o	A	(a.29.9.1)*1
2euc_1	216	216	26	22	19	10.868	0.634	0.561	0.490	0.570	0.540	0	0	1	0	0	0	C2o=	C2	(a.249.1.1)*2
2eul_1	312	312	49	31	28	42.532	0.831	0.311	0.202	0.337	0.258	1	0	0	0	0	0	C2m=	C2	(a.2.1.1,d.26.1.2)*2
2ev6_1	273	273	43	34	18	26.316	0.827	0.456	0.312	0.532	0.392	0	1	0	0	0	0	C2m=	C2	(a.4.5.24,a.76.1.1)*2
2evr_1	444	444	45	27	24	29.160	0.882	0.526	0.395	0.602	0.472	0	0	1	0	0	0	C2m=	C2	(b.34.11.3,d.3.1.16)*2
2ewn_1	635	635	56	46	27	69.552	0.767	0.413	0.282	0.400	0.358	1	0	0	0	0	0	C2m=	C2	(a.4.5.1,d.104.1.2,b.34.1.1)*2
2ex3_1	766	766	63	41	34	87.822	0.840	0.392	0.267	0.400	0.332	1	0	0	0	0	0	A2	A	(a.263.1.1)*1+(c.55.3.5,e.8.1.1)*1
2ey4_2	453	453	48	37	23	40.848	0.800	0.465	0.331	0.601	0.412	0	1	0	0	0	0	A3	A	(b.43.3.5)*1+(d.265.1.2,b.122.1.1)*1+(g.41.16.1)*1
2eyi_1	234	234	34	23	17	13.294	0.850	0.579	0.463	0.574	0.534	0	0	1	0	0	0	A1m	A	(a.40.1.0,a.40.1.0)*1
2eyq_1	1146	1146	66	50	42	138.600	0.717	0.361	0.254	0.392	0.313	1	0	0	0	0	0	A1m	A	(c.37.1.19,c.37.1.19,b.34.18.1,c.37.1.19,c.37.1.19,d.315.1.1)*1
2f06_1	576	576	37	32	28	33.152	0.617	0.559	0.453	0.384	0.512	0	0	1	0	0	0	D2	D2	(d.58.18.11,d.58.18.11)*4
2f1f_1	321	321	31	30	28	26.040	0.534	0.530	0.365	0.568	0.461	0	0	1	0	0	0	C2m=	C2	(d.58.18.6,d.58.18.6)*2
2f1l_1	328	328	35	27	22	20.790	0.714	0.523	0.408	0.447	0.469	0	0	1	0	0	0	C2m=	C2	(b.43.3.4,b.41.1.4)*2
2f1m_2	471	471	70	40	26	72.800	1.061	0.275	0.180	0.481	0.239	1	0	0	0	0	0	A2	A	(f.46.1.0)*2
2f22_1	285	285	30	25	23	17.250	0.625	0.565	0.455	0.633	0.526	0	0	1	0	0	0	C2o=	C2	(a.213.1.2)*2
2f23_1	154	154	39	21	12	9.828	1.182	0.481	0.381	0.514	0.442	0	1	0	0	0	0	A1m	A	(a.2.1.1,d.26.1.2)*1
2f2b_1	980	980	39	39	32	48.672	0.549	0.584	0.507	0.436	0.561	0	0	1	1	0	0	C4+	C4	(f.19.1.0)*4
2f2h_1	4638	4638	100	99	65	643.500	0.610	0.403	0.249	0.114	0.323	1	0	0	0	0	0	D3	D3	(b.30.5.11,c.1.8.13,b.71.1.4,b.150.1.1)*6
2f3o_1	3092	3092	67	65	63	274.365	0.523	0.424	0.329	0.104	0.378	0	1	0	0	0	0	D2	D2	(c.7.1.0)*4
2f48_1	1103	1103	55	49	32	86.240	0.679	0.497	0.372	0.509	0.442	0	1	0	0	0	0	C2o=	C2	(c.89.1.1)*2
2f4i_2	178	178	29	24	16	11.136	0.725	0.578	0.429	0.599	0.511	0	0	1	0	0	0	A1o	A	(b.40.11.1)*1
2f4m_1	356	356	43	31	23	30.659	0.796	0.510	0.354	0.597	0.445	0	0	1	0	0	0	A2	A	(a.189.1.1)*1+(d.3.1.4)*1
2f5g_1	260	260	40	20	20	16.000	1.000	0.600	0.462	0.570	0.541	0	0	1	0	0	0	C2o=	C2	(d.58.57.1)*2
2f5v_1	2308	2308	66	54	53	188.892	0.617	0.456	0.355	0.091	0.408	0	1	0	0	0	0	D2	D2	(c.3.1.2,d.16.1.1)*4
2f62_1	316	316	40	37	21	31.080	0.690	0.445	0.306	0.625	0.390	0	1	0	0	0	0	C2o=	C2	(c.23.14.1)*2
2f8s_2	704	704	46	43	30	59.340	0.630	0.360	0.336	0.140	0.350	0	1	0	0	0	0	A1m	A	(b.34.14.1,c.44.3.1,c.55.3.15)*1
2f9z_1	347	347	39	30	22	25.740	0.750	0.519	0.371	0.575	0.453	0	0	1	0	0	0	A2	A	(d.194.1.3)*1+(d.252.1.1)*1
2fa1_1	318	318	35	24	22	18.480	0.761	0.566	0.435	0.504	0.506	0	0	1	0	0	0	C2o=	C2	(d.190.1.2)*2
2fb5_1	612	612	58	56	29	94.192	0.682	0.340	0.211	0.387	0.285	1	0	0	0	0	0	C3	C3	(d.320.1.1)*3
2fcl_1	157	157	25	22	16	8.800	0.658	0.560	0.467	0.575	0.519	0	0	1	0	0	0	A1o	A	(d.218.1.11)*1
2fcw_1	184	184	40	23	17	15.640	1.000	0.457	0.327	0.499	0.398	0	1	0	0	0	0	A2	A	(a.13.1.1)*1+(g.12.1.1,g.12.1.1)*1
2fdo_1	187	187	32	22	19	13.376	0.780	0.579	0.393	0.589	0.494	0	0	1	0	0	0	C2o=	C2	(d.337.1.1)*2
2fe8_1	315	315	57	26	20	29.640	1.239	0.488	0.313	0.617	0.411	0	1	0	0	0	0	A1m	A	(d.15.1.9,d.3.1.23)*1
2fef_1	847	847	50	48	33	79.200	0.617	0.458	0.325	0.350	0.405	0	1	0	0	0	0	C3	C3	(a.29.11.1,a.254.1.1)*3
2fez_1	373	373	39	28	23	25.116	0.765	0.474	0.382	0.600	0.442	0	1	0	0	0	0	A1m	A	(a.4.6.1,a.118.8.3,b.26.1.2)*1
2ffh_1	407	407	45	34	24	36.720	0.776	0.415	0.301	0.467	0.366	0	1	0	0	0	0	A1m	A	(a.24.13.1,c.37.1.10,a.36.1.1)*1
2ffm_1	83	83	19	16	13	3.952	0.655	0.598	0.496	0.463	0.561	0	0	1	0	0	0	A1o	A	(d.267.1.1)*1
2fg1_1	157	157	27	20	16	8.640	0.750	0.596	0.486	0.562	0.556	0	0	1	0	0	0	A1o	A	(c.50.1.2)*1
2fgg_1	84	84	40	20	11	8.800	1.290	0.323	0.234	0.402	0.285	1	0	0	0	0	0	A1o	A	(d.50.5.1)*1
2fgq_1	990	990	47	47	33	72.897	0.588	0.419	0.347	0.508	0.395	0	1	0	0	0	0	C3	C3	(f.4.3.1)*3
2fgz_1	926	926	58	41	35	83.230	0.763	0.489	0.324	0.613	0.417	0	1	0	0	0	0	A1m	A	(b.1.18.2,b.1.18.2,c.1.8.1,b.71.1.1)*1
2fh1_2	324	324	34	31	24	25.296	0.618	0.490	0.354	0.573	0.429	0	1	0	0	0	0	A1m	A	(d.109.1.1,d.109.1.1,d.109.1.1)*1
2fhz_1	199	199	26	21	18	9.828	0.667	0.596	0.507	0.493	0.563	0	0	1	1	0	0	A2	A	(d.243.1.2)*1+(d.311.1.1)*1
2fi0_1	79	79	22	13	12	3.432	0.880	0.556	0.500	0.495	0.539	0	0	1	1	0	0	A1o	A	(a.248.1.1)*1
2fid_1	206	206	50	22	15	16.500	1.351	0.415	0.336	0.251	0.381	0	1	0	0	0	0	A3	A	(d.15.1.1)*2+(g.39.1.15)*1
2fif_1	132	132	40	16	13	8.320	1.379	0.518	0.395	0.548	0.462	0	0	1	0	0	0	A2	A	(d.15.1.1)*1+(g.39.1.15)*1
2fim_1	456	456	47	34	24	38.352	0.810	0.438	0.342	0.506	0.399	0	1	0	0	0	0	A2	A	(d.23.1.1)*2
2fiy_1	285	285	29	27	18	14.094	0.644	0.588	0.489	0.638	0.548	0	0	1	0	0	0	A1o	A	(e.59.1.1)*1
2fj8_1	120	120	30	20	16	9.600	0.833	0.475	0.341	0.670	0.426	0	1	0	0	0	0	A1m	A	(g.3.13.1,g.3.13.1)*1
2fjh_1	1062	1062	79	55	32	139.040	0.908	0.300	0.218	0.328	0.268	1	0	0	0	0	0	C2m≠	C2	(b.1.1.0,b.1.1.2)*2+(b.1.1.1)*2+(g.17.1.1)*2
2fju_1	873	873	61	46	32	89.792	0.782	0.416	0.291	0.534	0.370	1	0	0	0	0	0	A2	A	(b.55.1.1,a.39.1.7,c.1.18.1,b.7.1.1)*1+(c.37.1.8)*1
2fm8_1	479	479	55	36	25	49.500	0.902	0.466	0.294	0.543	0.389	1	0	0	0	0	0	A3	A	(a.257.1.1)*1+(d.198.1.0)*1+(d.198.1.1)*1
2fm9_1	201	201	32	23	18	13.248	0.780	0.539	0.397	0.625	0.476	0	0	1	0	0	0	A1o	A	(a.257.1.1)*1
2fma_1	59	59	23	11	8	2.024	1.211	0.630	0.572	0.616	0.614	0	0	1	1	0	0	A1o	A	(d.230.3.1)*1
2fmm_1	772	772	93	35	34	110.670	1.348	0.330	0.226	0.492	0.296	1	0	0	0	0	0	C2o≠	C2	(a.283.1.1)*2+(b.34.13.2)*8
2fn0_1	820	820	61	35	30	64.050	0.938	0.451	0.352	0.579	0.413	0	1	0	0	0	0	C2o=	C2	(d.161.1.1)*2
2fna_1	352	352	39	34	21	27.846	0.709	0.497	0.368	0.449	0.441	0	1	0	0	0	0	A1m	A	(c.37.1.20,a.4.5.11)*1
2fnj_1	403	403	50	31	24	37.200	0.909	0.437	0.315	0.416	0.387	0	1	0	0	0	0	A3	A	(b.29.1.22)*1+(d.15.1.1)*1+(d.42.1.1)*1
2fok_2	560	560	45	36	29	46.980	0.692	0.433	0.334	0.499	0.393	0	1	0	0	0	0	A1m	A	(a.4.5.12,a.4.5.12,a.4.5.12,c.52.1.12)*1
2fp1_1	329	329	48	25	21	25.200	1.043	0.486	0.354	0.567	0.432	0	1	0	0	0	0	C2o=	C2	(a.130.1.4)*2
2fp4_1	698	698	49	36	33	58.212	0.710	0.499	0.346	0.492	0.430	0	1	0	0	0	0	A2	A	(c.2.1.8,c.23.4.1)*1+(d.142.1.4,c.23.4.1)*1
2fpn_1	410	410	67	27	24	43.416	1.314	0.347	0.261	0.342	0.313	1	0	0	0	0	0	C2o=	C2	(d.129.10.1)*2
2fqm_2	139	139	33	26	16	13.728	0.786	0.503	0.306	0.616	0.411	0	0	1	0	0	0	C2o=	C2	(d.378.1.1)*2
2fr0_1	468	468	40	26	25	26.000	0.784	0.553	0.451	0.599	0.516	0	0	1	0	0	0	A1m	A	(c.2.1.2,c.2.1.2)*1
2fsq_1	232	232	28	25	17	11.900	0.667	0.492	0.482	0.438	0.500	0	1	0	0	0	0	A1o	A	(d.61.1.4)*1
2fsu_1	170	170	25	18	16	7.200	0.735	0.591	0.534	0.611	0.574	0	0	1	1	0	0	A1o	A	(c.67.2.1)*1
2ftx_1	149	149	25	21	17	8.925	0.658	0.596	0.445	0.460	0.528	0	0	1	0	0	0	A2	A	(d.300.1.1)*1+(d.300.1.2)*1
2fu5_1	264	264	35	28	20	19.600	0.729	0.503	0.380	0.486	0.453	0	0	1	0	0	0	A2	A	(b.88.1.1)*1+(c.37.1.8)*1
2fup_1	128	128	34	13	12	5.304	1.360	0.542	0.522	0.415	0.542	0	0	1	1	0	0	A1o	A	(a.47.5.1)*1
2fy8_1	1776	1776	77	67	42	216.678	0.706	0.432	0.258	0.038	0.328	1	0	0	0	0	0	D4+	D4	(c.2.1.9,d.286.1.1)*8
2fyg_1	128	128	31	20	17	10.540	0.838	0.532	0.344	0.650	0.450	0	0	1	0	0	0	A1o	A	(g.86.1.1)*1
2fyw_1	1600	1600	57	56	49	156.408	0.543	0.194	0.270	0.001	0.238	1	0	0	0	1	0	D3	D3	(c.135.1.1)*6
2fzt_1	157	157	50	14	14	9.800	1.786	0.524	0.434	0.508	0.490	0	0	1	0	0	0	C2o=	C2	(a.46.3.1)*2
2g2c_1	152	152	24	18	16	6.912	0.706	0.583	0.501	0.640	0.553	0	0	1	1	0	0	A1o	A	(c.57.1.1)*1
2g3r_1	119	119	25	17	15	6.375	0.781	0.600	0.472	0.397	0.540	0	0	1	0	0	0	A1m	A	(b.34.9.1,b.34.9.1)*1
2g45_1	193	193	49	25	17	20.825	1.167	0.334	0.239	0.428	0.296	1	0	0	0	0	0	A2	A	(d.15.1.1)*1+(g.44.1.5)*1
2g6t_1	612	612	49	41	28	56.252	0.710	0.287	0.294	0.030	0.295	1	0	0	0	1	0	C2o=	C2	(c.147.1.1)*2
2g6y_1	861	861	43	41	27	47.601	0.632	0.517	0.464	0.224	0.492	0	0	1	0	0	0	D2	D2	(d.22.1.0)*4
2g77_1	504	504	44	36	25	39.600	0.721	0.553	0.390	0.556	0.477	0	0	1	0	0	0	A2	A	(a.69.2.1,a.69.2.1)*1+(c.37.1.8)*1
2g7o_1	272	272	36	27	27	26.244	0.667	0.519	0.319	0.475	0.424	0	0	1	0	0	0	C4+	C4	(a.241.1.1)*4
2g81_1	279	279	35	22	20	15.400	0.833	0.594	0.449	0.579	0.530	0	0	1	0	0	0	A2	A	(b.47.1.2)*1+(g.3.13.1)*1
2g82_1	1320	1320	52	46	45	107.640	0.571	0.490	0.354	0.471	0.437	0	1	0	0	0	0	D2	D2	(c.2.1.3,d.81.1.1)*4
2g8l_1	571	571	52	28	26	37.856	0.963	0.321	0.371	0.060	0.348	0	1	0	0	1	0	C2o=	C2	(e.50.1.1)*2
2ga4_1	633	633	46	32	28	41.216	0.767	0.547	0.423	0.525	0.496	0	0	1	0	0	0	A4+	A	(b.40.2.1)*5+(d.165.1.2)*1
2ga6_1	1419	1419	44	43	43	81.356	0.512	0.287	0.379	0.009	0.324	1	0	0	0	1	0	TOI	T	(g.86.1.1)*12
2ga9_1	733	733	48	43	29	59.856	0.667	0.502	0.363	0.590	0.442	0	0	1	0	0	0	A2	A	(c.66.1.25)*1+(e.69.1.1)*1
2gax_1	135	135	30	20	15	9.000	0.857	0.423	0.345	0.480	0.390	0	1	0	0	0	0	A1o	A	(c.131.1.1)*1
2gb5_1	526	526	42	35	31	45.570	0.636	0.442	0.323	0.516	0.398	0	1	0	0	0	0	C2m=	C2	(d.113.1.4,g.41.14.1,d.113.1.4)*2
2gbl_1	2968	2968	85	56	55	261.800	0.766	0.413	0.333	0.051	0.371	0	1	0	0	0	0	C4+	C6	(c.37.1.11,c.37.1.11)*6
2gc4_1	759	759	60	32	30	57.600	0.968	0.497	0.367	0.555	0.440	0	1	0	0	0	0	A4+	A	(a.3.1.1)*1+(b.6.1.1)*1+(b.69.2.0)*1+(g.21.1.1)*1
2ge7_1	215	215	31	24	19	14.136	0.721	0.596	0.434	0.527	0.529	0	0	1	0	0	0	C2o=	C2	(d.254.1.2)*2
2gec_1	277	277	43	29	25	31.175	0.796	0.462	0.277	0.574	0.377	1	0	0	0	0	0	A2	A	(b.148.1.1)*2
2gep_1	472	472	33	32	27	28.512	0.559	0.558	0.437	0.567	0.505	0	0	1	0	0	0	A1m	A	(d.58.36.1,d.134.1.1,d.58.36.1,d.134.1.1)*1
2gf4_1	328	328	40	29	17	19.720	0.870	0.577	0.439	0.393	0.515	0	0	1	0	0	0	D2	D2	(a.8.10.1)*4
2gfq_1	846	846	57	48	33	90.288	0.704	0.281	0.254	0.056	0.268	1	0	0	0	0	0	A3	A	(c.56.7.1)*3
2gg2_1	263	263	30	24	22	15.840	0.652	0.595	0.461	0.683	0.541	0	0	1	0	0	0	A1o	A	(d.127.1.1)*1
2ghp_1	935	935	70	40	36	100.800	0.921	0.447	0.297	0.113	0.372	1	0	0	0	0	0	D2	D2	(d.58.7.1,d.58.7.1,d.58.7.1)*4
2ghv_1	366	366	48	34	26	42.432	0.800	0.429	0.275	0.318	0.357	1	0	0	0	0	0	C2o=	C2	(d.318.1.1)*2
2ghw_1	423	423	56	34	19	36.176	1.057	0.581	0.358	0.556	0.472	0	0	1	0	0	0	A2	A	(b.1.1.1,b.1.1.1)*1+(d.318.1.1)*1
2gix_1	818	818	43	40	37	63.640	0.558	0.390	0.350	0.306	0.380	0	1	0	0	0	0	C4+	C4	(b.1.18.16)*4
2gj3_1	238	238	30	24	23	16.560	0.638	0.512	0.391	0.509	0.467	0	0	1	0	0	0	C2o=	C2	(d.110.3.0)*2
2gk6_1	602	602	43	41	31	54.653	0.597	0.425	0.326	0.233	0.380	0	1	0	0	0	0	A1m	A	(c.37.1.19,b.49.4.1,c.37.1.19)*1
2gke_1	274	274	31	24	21	15.624	0.689	0.602	0.475	0.514	0.553	0	0	1	0	0	0	A1m	A	(d.21.1.1,d.21.1.1)*1
2gkp_1	164	164	24	23	17	9.384	0.600	0.526	0.453	0.523	0.507	0	0	1	0	0	0	A1o	A	(d.351.1.1)*1
2gkt_1	51	51	15	13	9	1.755	0.682	0.702	0.555	0.857	0.632	0	0	1	1	0	0	A1o	A	(g.68.1.1)*1
2glk_1	1552	1552	55	43	39	92.235	0.671	0.530	0.456	0.515	0.509	0	0	1	0	0	0	D2	D2	(c.1.15.3)*4
2glz_1	297	297	32	29	23	21.344	0.615	0.532	0.382	0.609	0.468	0	0	1	0	0	0	C2o=	C2	(d.81.3.1)*2
2gmh_1	581	581	41	38	28	43.624	0.621	0.555	0.401	0.442	0.489	0	0	1	0	0	0	A1m	A	(c.3.1.2,d.16.1.8,d.58.1.6)*1
2gno_1	296	296	40	23	21	19.320	0.909	0.459	0.381	0.179	0.419	0	1	0	0	0	0	A1m	A	(c.37.1.20,a.80.1.1)*1
2gnu_1	816	816	51	38	31	60.078	0.739	0.424	0.365	0.616	0.410	0	1	0	0	0	0	A3	A	(f.23.10.0,b.41.1.1)*1+(f.26.1.1)*2
2gnx_1	288	288	46	24	19	20.976	1.070	0.545	0.396	0.566	0.485	0	0	1	0	0	0	A1m	A	(a.246.3.1,d.109.3.1)*1
2gol_1	237	237	38	27	19	19.494	0.826	0.484	0.344	0.467	0.420	0	1	0	0	0	0	A2	A	(a.61.1.1)*1+(a.73.1.1)*1
2gom_1	121	121	34	15	15	7.650	1.133	0.490	0.407	0.433	0.463	0	1	0	0	0	0	C2o=	C2	(a.7.17.1)*2
2gp4_1	523	523	41	31	26	33.046	0.719	0.526	0.411	0.522	0.479	0	0	1	0	0	0	A1m	A	(d.334.1.1,c.8.2.2)*1
2gpi_1	91	91	24	16	12	4.608	0.857	0.625	0.493	0.567	0.565	0	0	1	0	0	0	A1o	A	(d.354.1.1)*1
2gqv_1	236	236	32	27	19	16.416	0.696	0.525	0.401	0.256	0.471	0	0	1	0	0	0	D2	D2	(b.34.4.1)*4
2gqw_1	802	802	48	38	37	67.488	0.640	0.342	0.304	0.209	0.330	0	1	0	0	0	0	C2m=	C2	(c.3.1.5,c.3.1.5,d.87.1.1)*2
2gr8_1	234	234	30	17	17	8.670	0.882	0.605	0.558	0.390	0.595	0	0	1	1	0	0	C3	C3	(d.24.1.4)*3
2grk_1	228	228	31	28	20	17.360	0.646	0.521	0.360	0.605	0.453	0	0	1	0	0	0	A1o	A	(b.27.1.1)*1
2grr_1	314	314	42	27	20	22.680	0.894	0.406	0.353	0.367	0.391	0	1	0	0	0	0	A2	A	(a.118.12.1)*1+(d.20.1.1)*1
2gs5_1	193	193	27	23	18	11.178	0.659	0.576	0.430	0.633	0.511	0	0	1	0	0	0	A1o	A	(d.310.1.1)*1
2gsk_1	671	671	48	30	28	40.320	0.828	0.426	0.413	0.566	0.439	0	1	0	0	0	0	A2	A	(d.212.1.2)*1+(f.4.3.3)*1
2gsv_1	135	135	23	21	16	7.728	0.622	0.635	0.478	0.571	0.560	0	0	1	0	0	0	C2o=	C2	(a.23.7.1)*2
2gtc_1	515	515	29	28	27	21.924	0.527	0.483	0.501	0.155	0.493	0	1	0	0	1	0	C4+	C5	(d.230.5.1)*5
2gts_1	77	77	39	11	9	3.861	1.950	0.549	0.486	0.327	0.527	0	0	1	0	0	0	A1o	A	(a.25.5.1)*1
2gud_1	242	242	28	19	19	10.108	0.737	0.562	0.509	0.489	0.545	0	0	1	1	0	0	C2o=	C2	(b.77.3.1)*2
2guk_1	446	446	39	32	23	28.704	0.709	0.512	0.414	0.165	0.462	0	0	1	0	0	0	D2	D2	(d.360.1.1)*4
2gum_1	1732	1732	102	47	46	220.524	1.097	0.327	0.232	0.519	0.296	1	0	0	0	0	0	C3	C3	(e.76.1.1)*3
2gvi_1	402	402	36	30	25	27.000	0.655	0.484	0.391	0.519	0.443	0	1	0	0	0	0	C2m=	C2	(d.81.3.1,g.39.1.18)*2
2gvk_1	1854	1854	52	52	47	127.088	0.525	0.442	0.396	0.160	0.427	0	1	0	0	0	0	D3	D3	(d.58.4.14)*6
2gwf_2	260	260	41	20	18	14.760	1.079	0.541	0.449	0.572	0.506	0	0	1	0	0	0	A2	A	(c.46.1.4)*1+(d.345.1.1)*1
2gx9_1	249	249	35	26	20	18.200	0.761	0.518	0.360	0.619	0.447	0	0	1	0	0	0	C2o=	C2	(d.299.1.1)*2
2h1l_1	3368	3368	101	98	37	366.226	0.748	0.432	0.290	0.404	0.361	1	0	0	0	0	0	C4+	C6	(b.2.5.2)*6+(c.37.1.20)*6
2h1t_1	370	370	50	26	22	28.600	1.042	0.540	0.388	0.533	0.478	0	0	1	0	0	0	C2o=	C2	(b.178.1.1)*2
2h21_2	440	440	66	33	28	60.984	1.082	0.260	0.203	0.062	0.231	1	0	0	0	0	0	A1m	A	(b.85.7.3,a.166.1.1)*1
2h2b_1	214	214	33	22	17	12.342	0.846	0.369	0.387	0.267	0.382	0	1	0	0	1	0	C2o=	C2	(b.36.1.1)*2
2h2i_1	1952	1952	52	51	51	135.252	0.510	0.307	0.363	0.001	0.330	0	1	0	0	1	0	D4+	D4	(c.31.1.0)*8
2h4o_1	496	496	35	34	34	40.460	0.515	0.228	0.284	0.000	0.243	1	0	0	0	1	0	D4+	D4	(d.368.1.1)*8
2h61_1	728	728	48	38	33	60.192	0.676	0.441	0.349	0.177	0.398	0	1	0	0	0	0	D2	D2	(a.39.1.2)*8
2h64_1	582	582	57	38	32	69.312	0.814	0.409	0.247	0.507	0.333	1	0	0	0	0	0	C2o≠	C2	(g.17.1.2)*2+(g.7.1.3)*4
2h6b_1	1896	1896	69	51	45	158.355	0.719	0.391	0.333	0.088	0.362	0	1	0	0	0	0	D2	D2	(b.82.3.2,a.4.5.4)*8
2h85_1	2082	2082	70	55	55	211.750	0.636	0.412	0.296	0.312	0.361	1	0	0	0	0	0	D3	D3	(c.66.1.48,d.294.1.2)*6
2h8e_1	240	240	28	27	23	17.388	0.560	0.503	0.401	0.479	0.470	0	0	1	0	0	0	C2o=	C2	(d.79.6.1)*2
2h9g_1	534	534	47	44	25	51.700	0.681	0.349	0.276	0.319	0.321	1	0	0	0	0	0	A3	A	(b.1.1.0,b.1.1.2)*1+(b.1.1.1,b.1.1.2)*1+(g.24.1.1,g.24.1.1,g.24.1.1)*1
2h9g_2	490	490	47	29	26	35.438	0.855	0.393	0.351	0.399	0.377	0	1	0	0	0	0	A3	A	(b.1.1.0,b.1.1.2)*1+(b.1.1.1,b.1.1.2)*1+(g.24.1.1)*1
2hba_1	52	52	19	12	10	2.280	0.864	0.579	0.497	0.630	0.557	0	0	1	0	0	0	A1o	A	(d.100.1.1)*1
2hbj_1	390	390	47	26	24	29.328	0.940	0.485	0.382	0.527	0.445	0	1	0	0	0	0	A1m	A	(c.55.3.5,a.60.8.4)*1
2hbw_1	221	221	30	23	18	12.420	0.732	0.582	0.458	0.600	0.531	0	0	1	0	0	0	A1m	A	(b.34.11.0,d.3.1.16)*1
2hcb_1	1272	1272	79	43	40	135.880	0.952	0.303	0.271	0.169	0.292	1	0	0	0	0	0	A4+	A	(c.37.1.20,a.4.12.2)*4
2hd3_2	561	561	41	38	21	32.718	0.695	0.346	0.404	0.019	0.373	0	1	0	0	1	0	C4+	C6	(b.40.15.1)*6
2hdz_1	66	66	26	17	9	3.978	1.000	0.591	0.432	0.796	0.518	0	0	1	0	0	0	A1o	A	(a.21.1.1)*1
2hek_1	1476	1476	56	53	42	124.656	0.589	0.497	0.365	0.232	0.436	0	1	0	0	0	0	D2	D2	(a.211.1.1)*4
2hf1_1	61	61	25	13	10	3.250	1.087	0.549	0.428	0.657	0.499	0	0	1	0	0	0	A1o	A	(b.171.1.1)*1
2hh6_1	224	224	43	34	23	33.626	0.754	0.340	0.213	0.391	0.286	1	0	0	0	0	0	C2o=	C2	(a.69.4.1)*2
2hhp_1	508	508	42	38	27	43.092	0.646	0.477	0.352	0.270	0.416	0	1	0	0	0	0	A1m	A	(d.218.1.3,a.160.1.1,d.58.16.1)*1
2hi7_1	322	322	43	28	19	22.876	0.915	0.410	0.352	0.295	0.384	0	1	0	0	0	0	A2	A	(a.29.15.1)*1+(c.47.1.13)*1
2hj9_1	1081	1081	61	43	39	102.297	0.744	0.461	0.326	0.510	0.400	0	1	0	0	0	0	A4+	A	(c.93.1.1)*2+(d.110.6.3)*2
2hkj_1	461	461	50	40	26	52.000	0.758	0.446	0.272	0.529	0.367	1	0	0	0	0	0	A1m	A	(d.122.1.2,a.156.1.3,d.14.1.3)*1
2hkq_1	272	272	39	31	16	19.344	0.830	0.469	0.340	0.572	0.411	0	1	0	0	0	0	C2o≠	C2	(a.245.1.1)*2+(b.34.10.1)*2
2hld_1	3289	3289	74	61	59	266.326	0.617	0.395	0.335	0.357	0.369	0	1	0	0	0	0	A4+	A	(a.137.8.1)*1+(b.49.1.1,c.37.1.11,a.69.1.1)*6+(b.93.1.1,a.2.10.1)*1+(c.49.2.1)*1
2hmq_1	904	904	42	42	34	59.976	0.553	0.356	0.393	0.000	0.362	0	1	0	0	1	0	D4+	D4	(a.24.4.1)*8
2hmq_2	226	226	32	25	19	15.200	0.727	0.530	0.424	0.430	0.490	0	0	1	0	0	0	C2o=	C2	(a.24.4.1)*2
2hng_1	250	250	45	24	21	22.680	1.000	0.420	0.325	0.628	0.389	0	1	0	0	0	0	C2o=	C2	(d.33.1.2)*2
2hnu_1	162	162	27	18	15	7.290	0.818	0.622	0.476	0.546	0.553	0	0	1	0	0	0	C2o=	C2	(b.9.1.1)*2
2hq4_2	159	159	30	18	15	8.100	0.909	0.643	0.528	0.537	0.599	0	0	1	1	0	0	A1o	A	(d.342.1.1)*1
2hqs_1	520	520	55	27	25	37.125	1.058	0.561	0.396	0.599	0.487	0	0	1	0	0	0	A2	A	(c.51.2.1,b.68.4.1)*1+(d.79.7.1)*1
2hqt_10	121	121	27	18	15	7.290	0.818	0.618	0.442	0.659	0.539	0	0	1	0	0	0	A1o	A	(a.45.1.2)*1
2hqy_1	594	594	50	37	25	46.250	0.806	0.508	0.384	0.526	0.462	0	0	1	0	0	0	C2m=	C2	(d.108.1.4,d.108.1.4)*2
2hs1_1	198	198	36	19	15	10.260	1.059	0.549	0.480	0.521	0.529	0	0	1	0	0	0	C2o=	C2	(b.50.1.1)*2
2hs3_1	602	602	47	29	23	31.349	0.904	0.543	0.490	0.630	0.531	0	0	1	0	0	0	A1m	A	(d.79.4.1,d.139.1.1,d.79.4.1,d.139.1.1)*1
2hs5_1	207	207	34	21	18	12.852	0.872	0.519	0.409	0.579	0.475	0	0	1	0	0	0	A1m	A	(a.4.5.6,a.78.1.1)*1
2hsg_1	328	328	53	26	18	24.804	1.205	0.403	0.342	0.545	0.384	0	1	0	0	0	0	A1m	A	(a.35.1.5,c.93.1.1)*1
2hth_1	202	202	29	29	23	19.343	0.558	0.444	0.308	0.648	0.385	0	1	0	0	0	0	A2	A	(b.55.1.12)*1+(d.15.1.1)*1
2htm_2	603	603	67	28	22	41.272	1.340	0.557	0.401	0.582	0.489	0	0	1	0	0	0	C2o≠	C2	(c.1.31.0)*2+(d.15.3.2)*2
2hue_1	321	321	36	32	19	21.888	0.706	0.488	0.390	0.536	0.449	0	1	0	0	0	0	A3	A	(a.22.1.1)*2+(b.1.22.1)*1
2huh_1	294	294	38	23	20	17.480	0.884	0.549	0.424	0.708	0.499	0	0	1	0	0	0	C2o=	C2	(b.7.5.1)*2
2hw4_1	116	116	33	17	13	7.293	1.100	0.638	0.445	0.650	0.549	0	0	1	0	0	0	A1o	A	(d.322.1.1)*1
2hwj_1	773	773	45	37	34	56.610	0.634	0.382	0.371	0.192	0.381	0	1	0	0	0	0	D2	D2	(d.268.1.3)*4
2hxv_1	698	698	61	45	27	74.115	0.847	0.402	0.279	0.504	0.345	1	0	0	0	0	0	C2m=	C2	(c.97.1.2,c.71.1.2)*2
2hyd_1	1156	1156	81	40	36	116.640	1.066	0.470	0.303	0.275	0.384	0	1	0	0	0	0	C2m=	C2	(f.37.1.1,c.37.1.12)*2
2hz5_1	173	173	29	21	18	10.962	0.744	0.559	0.425	0.607	0.503	0	0	1	0	0	0	C2o=	C2	(d.110.7.1)*2
2i00_2	794	794	50	37	36	66.600	0.685	0.505	0.368	0.389	0.449	0	0	1	0	0	0	C2m=	C2	(d.108.1.10,d.106.1.4)*2
2i0u_1	732	732	38	37	35	49.210	0.528	0.263	0.342	0.010	0.296	1	0	0	0	1	0	D3	D3	(a.133.1.2)*6
2i0z_1	416	416	52	24	19	23.712	1.209	0.514	0.430	0.471	0.481	0	0	1	0	0	0	A1m	A	(c.3.1.8,e.74.1.1)*1
2i15_1	359	359	55	37	25	50.875	0.887	0.323	0.209	0.247	0.268	1	0	0	0	0	0	A3	A	(a.291.1.1)*3
2i1q_1	311	311	35	28	23	22.540	0.686	0.483	0.374	0.589	0.445	0	1	0	0	0	0	A1m	A	(a.60.4.1,c.37.1.11)*1
2i1s_2	181	181	36	25	14	12.600	0.923	0.629	0.426	0.583	0.532	0	0	1	0	0	0	A1o	A	(d.343.1.1)*1
2i5h_1	178	178	38	21	15	11.970	1.056	0.581	0.427	0.638	0.518	0	0	1	0	0	0	A1o	A	(e.71.1.1)*1
2i5i_1	1566	1566	54	45	45	109.350	0.600	0.447	0.395	0.308	0.428	0	1	0	0	0	0	D3	D3	(c.6.2.8)*6
2i5n_1	1178	1178	78	39	35	106.470	1.054	0.460	0.335	0.426	0.409	0	1	0	0	0	0	A4+	A	(a.138.1.2)*1+(f.23.10.1,b.41.1.1)*1+(f.26.1.1)*2
2i5u_1	77	77	17	15	11	2.805	0.654	0.624	0.590	0.495	0.617	0	0	1	1	0	0	A1o	A	(a.275.1.1)*1
2i5v_1	246	246	49	23	15	16.905	1.289	0.506	0.362	0.658	0.442	0	0	1	0	0	0	A1o	A	(b.76.1.1)*1
2i71_1	747	747	63	42	25	66.150	0.940	0.505	0.347	0.593	0.439	0	0	1	0	0	0	C2o=	C2	(e.72.1.1)*2
2i7c_1	562	562	41	27	26	28.782	0.774	0.581	0.492	0.485	0.538	0	0	1	0	0	0	C2o=	C2	(c.66.1.0)*2
2i8d_1	242	242	27	26	21	14.742	0.574	0.503	0.440	0.533	0.483	0	0	1	0	0	0	C2o=	C2	(d.198.4.1)*2
2i9a_2	127	127	33	20	12	7.920	1.031	0.561	0.423	0.513	0.501	0	0	1	0	0	0	A1m	A	(g.3.11.1,g.14.1.1)*1
2i9i_1	442	442	47	29	21	28.623	0.940	0.521	0.429	0.526	0.490	0	0	1	0	0	0	C2o=	C2	(c.51.6.1)*2
2i9w_1	177	177	34	22	17	12.716	0.872	0.563	0.391	0.519	0.487	0	0	1	0	0	0	A1m	A	(g.74.1.1,d.17.4.30,g.74.1.1)*1
2i9x_1	171	171	31	20	18	11.160	0.816	0.552	0.413	0.588	0.494	0	0	1	0	0	0	C2o=	C2	(d.366.1.1)*2
2ia1_1	339	339	50	27	24	32.400	0.980	0.579	0.358	0.508	0.470	0	0	1	0	0	0	C2o=	C2	(d.359.1.1)*2
2ia7_1	111	111	26	21	17	9.282	0.684	0.391	0.302	0.679	0.362	0	1	0	0	0	0	A1o	A	(d.373.1.1)*1
2iaf_1	140	140	21	20	18	7.560	0.553	0.615	0.482	0.577	0.558	0	0	1	0	0	0	A1o	A	(d.81.2.1)*1
2iay_1	114	114	23	19	16	6.992	0.657	0.555	0.422	0.527	0.503	0	0	1	0	0	0	A1o	A	(d.376.1.1)*1
2iaz_1	441	441	36	34	31	37.944	0.554	0.306	0.284	0.502	0.311	1	0	0	0	0	0	D2	D2	(a.281.1.2)*4
2ibg_2	355	355	49	29	19	26.999	1.021	0.487	0.368	0.500	0.436	0	1	0	0	0	0	A2	A	(b.1.2.1,b.1.2.1)*1+(d.65.1.2)*1
2ibz_1	2179	2179	103	84	54	467.208	0.746	0.265	0.151	0.222	0.210	1	0	0	0	0	0	A4+	A	(a.3.1.3,f.23.11.1)*1+(b.1.1.1)*2+(d.185.1.1,d.185.1.1)*2+(f.21.1.2,f.32.1.1)*1+(f.23.12.1,b.33.1.1)*1+(f.23.13.1)*1+(f.23.14.1)*1+(f.27.1.1)*1+(f.28.1.1)*1
2ich_2	323	323	30	27	23	18.630	0.600	0.583	0.466	0.582	0.534	0	0	1	0	0	0	A1o	A	(b.176.1.1)*1
2icu_2	213	213	26	24	19	11.856	0.605	0.580	0.463	0.605	0.537	0	0	1	0	0	0	A1o	A	(d.303.1.0)*1
[truncated: 1,595 more rows]
